# Supplementary material for: Chronic Intermittent Hypoxia Exposure Induces a Unique Microglial Transcriptome in 5XFAD Mice
Source: Mol Neurobiol. 2025 Nov 19;63(1):81. doi: 10.1007/s12035-025-05390-7 (PMC12627174; doi:10.1007/s12035-025-05390-7)
Supplement: Supplementary file 1 — (XLSX 342 KB) [file 12035_2025_5390_MOESM1_ESM.xlsx]

## Sheet: F WT NX vs. 5X NX
gene name	logFC	logCPM	LR	PValue	FDR
Bag1	1.00016	6.48055	59.3822	1.29839e-14	3.36465e-13
Lipa	1.00069	7.60695	59.4246	1.27069e-14	3.30495e-13
Rpl29	1.00148	7.00052	52.9596	3.40475e-13	7.49204e-12
Gm32643	1.00217	2.45682	13.2282	0.000275764	0.00128814
Eno1b	1.00238	2.82607	12.6572	0.000374126	0.00168315
Chd5	1.00537	1.22185	8.42524	0.00370047	0.0123515
Ergic3	1.00622	7.67755	58.706	1.83081e-14	4.64232e-13
Tmem238	1.00627	1.12304	7.4605	0.00630673	0.0193696
Raver2	1.00664	0.505814	5.65226	0.0174329	0.0453833
Foxd2	1.00688	0.75912	8.39488	0.00376279	0.0125329
Man2b2	1.0071	8.72998	48.6364	3.08094e-12	5.93092e-11
Rpl13a	1.00718	9.45585	26.3092	2.90903e-07	2.64014e-06
Itga5	1.00906	6.20728	43.1063	5.18458e-11	8.51005e-10
Rpl17-ps3	1.00909	6.65233	36.2807	1.70849e-09	2.23001e-08
Gm27042	1.00918	0.917518	8.48994	0.00357115	0.0119764
Gga2	1.00996	5.35028	67.4868	2.121e-16	6.836e-15
Rps19-ps6	1.01302	2.44324	10.8021	0.00101382	0.00402373
Olfm4	1.01309	3.58102	20.1564	7.13611e-06	4.92771e-05
Pgam1-ps2	1.01565	0.799963	5.7687	0.0163141	0.0429848
Cenpb	1.01843	6.46824	31.1406	2.39997e-08	2.60407e-07
Rps13-ps2	1.01869	1.23913	8.86551	0.00290609	0.0100509
Acot1	1.01876	1.15503	8.00848	0.00465588	0.0149753
Plekhb2	1.01931	6.93175	72.2677	1.879e-17	6.76486e-16
Bcl6	1.02043	5.18826	42.5205	6.99439e-11	1.12204e-09
Dhx32	1.02212	5.51216	57.2458	3.84601e-14	9.44742e-13
Nucb1	1.02334	8.50363	58.8519	1.69994e-14	4.34944e-13
Gm14586	1.02379	0.578263	8.33007	0.00389942	0.0129423
Nenf	1.02414	4.80147	33.1121	8.69971e-09	1.01061e-07
Rgs1	1.0248	6.13879	18.1959	1.99311e-05	0.000125058
Gm2a	1.02498	8.54095	52.4444	4.42613e-13	9.57573e-12
Pmaip1	1.02597	4.45047	26.966	2.0707e-07	1.92752e-06
Bola2	1.02651	4.26703	29.9404	4.45522e-08	4.64531e-07
Clybl	1.02746	1.8948	13.0978	0.000295638	0.00137147
Gm9118	1.02752	1.78316	12.4233	0.00042401	0.00187537
Dtnbp1	1.03046	5.62287	58.0173	2.59829e-14	6.4724e-13
Rpl22	1.03063	7.38438	48.0426	4.17063e-12	7.86804e-11
4933432I03Rik	1.0312	0.712447	8.48415	0.00358255	0.0120089
Gm46060	1.03149	1.19609	7.45948	0.00631032	0.0193718
Ccl5	1.03262	2.56583	6.84731	0.00887747	0.0257864
Iqgap3	1.03738	5.15668	74.2627	6.83838e-18	2.55969e-16
Rpl3-ps1	1.03929	5.19925	61.8582	3.69095e-15	1.02398e-13
Gltp	1.04061	7.35825	51.9538	5.68217e-13	1.22184e-11
Creg1	1.04123	8.79749	49.1687	2.34872e-12	4.59005e-11
Rpl35	1.04157	7.54007	48.411	3.45616e-12	6.58159e-11
Rps11	1.04166	5.2469	43.2668	4.77622e-11	7.90394e-10
Igbp1	1.04172	5.8118	61.8285	3.74719e-15	1.03553e-13
Rpl9	1.04258	7.91259	56.2277	6.45461e-14	1.53489e-12
Nrp2	1.04341	6.56216	47.0676	6.85783e-12	1.26508e-10
Coa5	1.04404	6.71618	83.3717	6.79871e-20	3.06353e-18
Rnd2	1.04408	1.71947	11.4476	0.000715865	0.0029738
Atxn10	1.04411	6.9093	74.0021	7.80321e-18	2.90546e-16
Rps3	1.04417	9.09203	35.0951	3.13994e-09	3.92118e-08
Rplp1	1.04496	9.63657	26.2978	2.92619e-07	2.65402e-06
Baalc	1.04518	0.676183	5.65893	0.0173667	0.0452415
Gm4705	1.04757	-0.107991	5.52332	0.0187646	0.0482203
Serpinb6a	1.04764	4.23311	13.5987	0.000226338	0.00108155
Tomm7	1.04799	4.42039	23.2637	1.41244e-06	1.12716e-05
Syt11	1.04813	5.64608	46.7663	7.99785e-12	1.46204e-10
Aldh1b1	1.04871	1.61146	10.1828	0.00141755	0.00538297
Rps3a1	1.0503	9.20034	31.415	2.08366e-08	2.27482e-07
Rpl3	1.05086	9.21773	35.2373	2.91878e-09	3.66766e-08
Hgf	1.05161	2.68713	12.0916	0.000506492	0.0021882
Grrp1	1.05193	0.698309	6.22397	0.0126032	0.0347203
Foxd2os	1.05197	0.0390562	8.06385	0.00451573	0.0146041
Rps10	1.05296	7.69639	55.7141	8.38159e-14	1.96018e-12
Rpl7	1.05467	8.88522	38.9659	4.31272e-10	6.18872e-09
Gm8292	1.05571	0.92351	6.89881	0.00862533	0.025168
H2-T22	1.05782	5.87577	53.8041	2.21513e-13	4.95916e-12
Rps24	1.05788	8.79636	39.9653	2.58511e-10	3.84613e-09
Rpl36-ps12	1.05848	1.19968	8.80601	0.00300241	0.0103335
Rpl24	1.05979	7.39046	51.3174	7.85759e-13	1.6422e-11
Slc2a3	1.05984	4.25375	44.4555	2.60204e-11	4.46258e-10
Ung	1.05995	0.876432	7.00739	0.00811738	0.0239526
Gm8325	1.06026	1.0109	8.31006	0.00394261	0.0130458
Gm38729	1.06029	1.14199	9.28437	0.00231118	0.00826281
Gm17828	1.06045	1.37653	5.84071	0.0156595	0.0415065
Ifih1	1.062	5.59016	55.6061	8.85472e-14	2.06401e-12
Pfdn5	1.0634	6.75258	59.6268	1.14663e-14	2.99329e-13
Phf11d	1.06367	4.95433	64.9427	7.7109e-16	2.33123e-14
Gm29901	1.06473	0.776941	6.12479	0.01333	0.0364103
Gm2000	1.06473	3.87356	28.8117	7.97686e-08	7.96504e-07
Rpl11	1.06588	8.08224	40.6	1.86807e-10	2.83598e-09
Cxcl10	1.06626	3.98052	6.05675	0.0138533	0.0375327
Dnaaf4	1.06704	-0.00772176	7.77029	0.00531124	0.0167444
Nme2	1.06878	6.07456	48.7348	2.9302e-12	5.66385e-11
Rpl9-ps4	1.06887	4.00212	19.7806	8.68615e-06	5.8945e-05
Gm4366	1.06906	3.1094	21.396	3.73559e-06	2.74571e-05
Scarb1	1.06929	6.01504	73.503	1.00482e-17	3.7024e-16
Dhx58	1.07037	5.16086	54.4707	1.57784e-13	3.59498e-12
Fdps	1.07114	4.16828	42.603	6.70572e-11	1.07695e-09
Cytip	1.07125	3.99047	16.4551	4.98169e-05	0.000283724
Gm15459	1.07225	4.09526	26.8154	2.23849e-07	2.07144e-06
Lyz2	1.07239	10.3536	5.74297	0.0165548	0.043554
Cox6a1	1.07446	6.80743	40.9486	1.5629e-10	2.39323e-09
Rpl9-ps7	1.07633	1.93318	12.1353	0.000494759	0.00214405
Tmem82	1.07677	0.404464	9.3033	0.00228741	0.00819771
Gm8451	1.07681	0.550502	8.1341	0.00434403	0.0141458
Epb41l5	1.07718	2.35528	17.7351	2.53901e-05	0.000155249
Maged1	1.07782	7.10895	93.3388	4.40668e-22	2.42607e-20
LOC118567690	1.07958	1.97086	13.847	0.00019831	0.000963894
Mfap3l	1.0812	2.94451	20.644	5.53105e-06	3.92668e-05
Rps10-ps2	1.08321	6.54848	51.7831	6.19821e-13	1.32275e-11
Gm31292	1.08384	0.97338	10.0953	0.0014865	0.00560419
Atg7	1.08407	4.58436	43.8025	3.63243e-11	6.13309e-10
Hspa1b	1.08433	7.14787	19.3498	1.08831e-05	7.22594e-05
Rpl31	1.08441	7.29556	40.4947	1.9715e-10	2.98711e-09
Lyst	1.08755	7.07068	99.5409	1.9215e-23	1.21916e-21
Rps16-ps2	1.08834	5.18536	39.6355	3.06062e-10	4.49685e-09
Bnip3	1.08861	5.78133	31.0864	2.46789e-08	2.67162e-07
Fzd7	1.09068	6.18652	43.684	3.85913e-11	6.49261e-10
Aldh1l2	1.09075	3.60631	23.5655	1.20731e-06	9.78366e-06
Rps7-ps3	1.09103	6.40765	45.3618	1.63797e-11	2.87183e-10
Gm34432	1.0933	2.26227	14.4583	0.0001433	0.000724124
Mb21d2	1.09367	3.0363	20.9013	4.83568e-06	3.47486e-05
Uqcrh	1.09389	5.83924	55.9691	7.36184e-14	1.73028e-12
Gm32131	1.09454	0.352046	6.81349	0.00904716	0.0262258
Tgoln1	1.0954	8.32095	66.1992	4.07585e-16	1.26745e-14
Fnip2	1.09556	7.33568	82.5682	1.02084e-19	4.51373e-18
Rpl17-ps10	1.09608	7.29383	38.2458	6.23697e-10	8.72867e-09
Sc5d	1.09687	4.84903	59.0991	1.49926e-14	3.86395e-13
Gm51770	1.09733	0.361617	8.15215	0.00430102	0.0140316
Gm7143	1.09778	0.913378	9.82801	0.00171874	0.00635776
Gm9843	1.09847	3.82744	33.4146	7.44639e-09	8.74348e-08
Ly6e	1.09858	10.1077	29.7225	4.98529e-08	5.14492e-07
Rpl12	1.09937	8.37766	41.9828	9.208e-11	1.45244e-09
Mgst3	1.09977	3.2797	21.7977	3.02965e-06	2.25851e-05
H2bc8	1.10073	3.04865	9.57785	0.00196939	0.00717059
LOC118567856	1.10096	1.83631	9.06453	0.00260615	0.0091477
Mpst	1.10115	4.21507	38.5257	5.40367e-10	7.66866e-09
Slc2a1	1.10141	6.87109	29.4201	5.82707e-08	5.95287e-07
Eef1b2	1.10203	7.88339	51.3449	7.74846e-13	1.62179e-11
Pogk	1.10247	6.20827	62.0014	3.43217e-15	9.55942e-14
Rps7	1.10275	7.92064	51.3664	7.66383e-13	1.60645e-11
Ctsa	1.10355	10.6517	25.0342	5.63237e-07	4.84158e-06
Gm41107	1.10418	1.69894	9.74974	0.00179348	0.00660119
Glmp	1.1057	7.62248	82.5275	1.04208e-19	4.579e-18
Rack1	1.10649	8.82824	45.1748	1.80213e-11	3.12479e-10
Rps13	1.10669	7.58822	57.1092	4.12264e-14	1.00398e-12
Rpl10a	1.10691	8.59275	56.0618	7.02296e-14	1.65613e-12
Rora	1.1079	4.18323	36.967	1.20145e-09	1.60523e-08
Rpl4	1.1086	9.53291	33.2471	8.11587e-09	9.49755e-08
Npr1	1.10905	2.30879	13.9301	0.000189737	0.000927318
Mical1	1.10908	6.16549	73.0152	1.28656e-17	4.69164e-16
Rpl10	1.10936	9.43217	35.4325	2.64047e-09	3.35368e-08
P3h3	1.10952	6.00232	72.0651	2.08217e-17	7.43957e-16
Fxyd5	1.11012	5.05954	6.6894	0.00969879	0.0278976
Rps15	1.11333	8.39929	48.7475	2.91129e-12	5.635e-11
Gm13408	1.11457	0.338558	9.18808	0.00243597	0.00864906
Pabpc1	1.11498	9.35989	39.7257	2.92261e-10	4.30749e-09
Lrrc8c	1.11511	2.71529	13.3166	0.000263069	0.00123578
Rusc2	1.11869	5.62528	76.7455	1.94471e-18	7.62207e-17
Gpx3	1.11895	3.83155	14.898	0.000113485	0.000589899
Gm5148	1.11939	4.10419	36.961	1.20519e-09	1.60718e-08
Prrg1	1.11939	0.208072	6.45254	0.0110794	0.03124
Rps23	1.12054	8.53366	48.8126	2.8163e-12	5.4661e-11
Rps15a	1.12187	7.559	62.3809	2.83057e-15	7.94637e-14
Prdx6	1.12552	5.27941	43.2344	4.85591e-11	8.01707e-10
Ptprg	1.12657	2.71159	10.8196	0.00100429	0.00399147
Eef1g	1.12672	7.67635	69.08	9.45495e-17	3.1928e-15
Cfb	1.12744	1.53819	7.88539	0.00498359	0.0158527
Xaf1	1.12838	5.42935	67.5154	2.09051e-16	6.75377e-15
Fblim1	1.12871	6.08652	52.7073	3.87155e-13	8.46654e-12
Postn	1.12889	3.917	21.315	3.89678e-06	2.84938e-05
Mansc1	1.12936	1.88513	12.9223	0.00032469	0.00148819
2210418O10Rik	1.13013	-0.0153342	8.52208	0.00350864	0.0118048
Paqr8	1.13234	2.79603	19.1468	1.21039e-05	7.97289e-05
Tspan5	1.13285	4.32279	51.1846	8.40777e-13	1.75201e-11
Fcho1	1.13298	1.95945	12.549	0.000396418	0.00176993
Arhgef5	1.13388	2.46771	14.7934	0.000119952	0.000618741
Rplp2	1.1343	8.16081	52.9504	3.42079e-13	7.51565e-12
Dhcr7	1.13685	5.13067	77.8444	1.11484e-18	4.46853e-17
H2-T23	1.13705	8.48052	58.3247	2.2224e-14	5.58522e-13
Dusp3	1.1373	6.62331	57.0812	4.18174e-14	1.01662e-12
Ldha	1.13838	7.9008	33.6149	6.71751e-09	7.98707e-08
Rpl7a-ps11	1.13919	2.02474	14.3916	0.000148465	0.000747822
Fau	1.1395	8.97363	42.9328	5.66541e-11	9.235e-10
Gsto1	1.14111	5.0713	52.8406	3.61745e-13	7.9354e-12
Gm14648	1.1422	0.862627	9.85917	0.00168987	0.0062692
TrnC	1.1432	1.48581	11.6038	0.000658185	0.0027536
Rps6	1.14322	8.9271	42.7637	6.17663e-11	9.98779e-10
S100a1	1.14354	3.21637	22.3525	2.2692e-06	1.73551e-05
Atp1b3	1.14372	8.19708	67.4506	2.16036e-16	6.94704e-15
Cdk1	1.14537	2.68769	15.0091	0.000106994	0.000560064
Fuca1	1.14539	7.35555	87.8272	7.14301e-21	3.49711e-19
Rps21	1.14539	7.32876	46.1648	1.08714e-11	1.9545e-10
Car13	1.14569	1.23715	8.18056	0.00423416	0.0138646
Chic1	1.14693	3.30889	25.7726	3.84099e-07	3.40302e-06
Echs1	1.14705	6.23029	62.861	2.21816e-15	6.32757e-14
Lrrc9	1.14738	2.09725	14.6469	0.00012965	0.000664402
Rps20	1.14785	7.82533	62.7874	2.30273e-15	6.52932e-14
Sil1	1.14843	5.65768	60.5044	7.34159e-15	1.95624e-13
Esrrg	1.14961	1.10861	8.96798	0.00274753	0.0095916
Npm1	1.15317	7.54636	76.6657	2.02487e-18	7.91432e-17
Rpl19-ps11	1.15548	3.34	24.4015	7.82098e-07	6.5712e-06
Tmem254a	1.15561	4.26262	41.6003	1.11978e-10	1.74876e-09
Gm42333	1.15724	0.730314	8.10487	0.00441465	0.0143329
Gm10154	1.15766	2.14495	12.6535	0.000374854	0.00168589
2310022B05Rik	1.158	4.95422	57.7935	2.91136e-14	7.20154e-13
Eif3h	1.15942	6.9784	73.3789	1.07004e-17	3.93245e-16
Rps4x	1.15986	9.16353	42.1494	8.45589e-11	1.33828e-09
Slc18a1	1.16074	0.565827	9.11777	0.00253139	0.00894521
Lancl2	1.16095	1.86399	13.5582	0.00023128	0.0011033
Gm11249	1.16229	2.64446	10.4162	0.00124916	0.00481589
Slc25a13	1.16257	3.14248	25.9514	3.50125e-07	3.1287e-06
Gm21399	1.16435	0.127461	8.00219	0.00467208	0.0150171
Rps16	1.16521	8.18821	51.4117	7.489e-13	1.57447e-11
Gpr162	1.16591	4.75161	29.4113	5.8535e-08	5.97124e-07
Plek	1.16699	9.85033	34.8661	3.53169e-09	4.37948e-08
Rps25	1.16739	8.35776	49.329	2.16436e-12	4.24148e-11
Gm16315	1.16757	0.662925	11.4214	0.000726021	0.00301334
Slc16a1	1.16977	5.05945	92.7297	5.99459e-22	3.225e-20
Rps2-ps10	1.17047	2.92905	12.9027	0.000328107	0.0015019
Pgam1	1.17188	6.89988	38.453	5.60884e-10	7.92011e-09
Rpl14-ps1	1.1735	6.28697	61.3899	4.68216e-15	1.274e-13
Eif4b	1.17503	8.28256	68.7516	1.1168e-16	3.72679e-15
Shroom4	1.17517	0.754825	7.74017	0.00540058	0.0169655
Atp2a1	1.17613	1.25315	9.72534	0.00181745	0.00667577
Rpl18a	1.17902	8.88077	40.4923	1.97395e-10	2.98711e-09
Nap1l1	1.17918	6.54584	58.6598	1.87431e-14	4.74411e-13
Rps19	1.18013	7.62392	59.8208	1.03897e-14	2.73242e-13
Gm9493	1.18088	3.16943	25.1668	5.25806e-07	4.55008e-06
Gm6344	1.18233	6.18772	56.1469	6.7255e-14	1.58863e-12
Scpep1	1.18264	7.29235	93.9089	3.30382e-22	1.85499e-20
H2-M3	1.1832	6.26162	78.2774	8.95404e-19	3.63011e-17
Tspan17	1.18344	2.99554	23.0741	1.5588e-06	1.23454e-05
Tmem132a	1.18359	6.42444	77.9614	1.05074e-18	4.2477e-17
Cd9	1.18374	10.2352	32.8567	9.92104e-09	1.13939e-07
Rpl38-ps2	1.18432	3.19998	20.695	5.38552e-06	3.84211e-05
Gm2225	1.18545	0.0544744	9.12903	0.00251585	0.00889698
Ier3	1.18548	5.52623	18.0277	2.17712e-05	0.000135343
Gm30189	1.18554	1.0937	10.1217	0.00146534	0.00553915
Nsa2	1.18646	6.43215	70.4333	4.76101e-17	1.65512e-15
Slc39a2	1.18705	1.02778	9.39177	0.00217961	0.00784716
Cox7a2l	1.18712	7.35432	73.5131	9.99683e-18	3.69308e-16
Gm4786	1.18834	1.01789	11.1471	0.000841636	0.00342094
Gm13436	1.18902	0.631996	11.4928	0.000698668	0.00290749
Rpl7a-ps5	1.19028	3.24052	13.7651	0.000207146	0.000999968
Rpl13	1.19128	9.08822	42.8755	5.83366e-11	9.47652e-10
Atp6v1a	1.19261	7.03982	50.174	1.40697e-12	2.83175e-11
LOC118567384	1.1947	1.00533	6.34041	0.0118017	0.0329225
Socs6	1.19568	6.8306	115.333	6.65192e-27	5.70412e-25
Eef2	1.19621	10.7109	27.3674	1.68244e-07	1.59123e-06
Gm20559	1.19648	3.60743	23.3927	1.32081e-06	1.06183e-05
Ndrg2	1.19771	4.84171	28.1526	1.1212e-07	1.09406e-06
Bcl2a1b	1.1999	6.59818	62.0842	3.29075e-15	9.20173e-14
Osm	1.19991	5.53065	26.1624	3.13876e-07	2.82868e-06
Cacna1s	1.19992	3.13479	29.8736	4.61154e-08	4.80122e-07
Slc25a43	1.20034	2.36531	18.7895	1.45969e-05	9.49135e-05
Ggct	1.20093	1.98578	15.437	8.53003e-05	0.000457684
Hmcn2	1.20095	-0.0625932	8.8463	0.00293684	0.0101424
Gm10177	1.20125	1.88773	12.2717	0.00045989	0.00200771
Rps2	1.20141	8.42956	51.8186	6.08716e-13	1.30102e-11
Rps12-ps4	1.20518	1.02193	10.3782	0.00127511	0.0049078
Amotl2	1.20527	1.95581	12.3156	0.000449198	0.00197137
Rps12	1.2063	7.61793	57.1904	3.95602e-14	9.67716e-13
Gm13841	1.20741	4.17201	48.8456	2.76929e-12	5.38223e-11
Gm5425	1.20756	0.211516	9.77954	0.00176464	0.00650884
Bcl2a1d	1.20952	3.21033	14.0355	0.000179395	0.000881648
Capn5	1.21029	1.0907	11.7009	0.000624686	0.00263526
Rpl27a	1.21109	8.52659	58.0952	2.49739e-14	6.24304e-13
Tsku	1.21204	0.16499	7.10361	0.00769288	0.0229295
Gm9616	1.21318	5.18779	56.0014	7.24211e-14	1.70497e-12
Rpl6	1.21343	8.86502	45.6153	1.4391e-11	2.54522e-10
Sh3bgrl	1.21446	5.29041	24.6173	6.99208e-07	5.92401e-06
Stat2	1.21686	6.62447	53.971	2.03473e-13	4.56249e-12
Unc13a	1.21687	3.50477	35.7907	2.19692e-09	2.82327e-08
Gm15427	1.21716	6.45308	43.7057	3.81662e-11	6.42874e-10
Clec1b	1.21741	0.39649	7.50125	0.00616562	0.0189853
Bcas1	1.21743	1.83542	7.66388	0.00563373	0.0175654
Gm15772	1.21831	3.99102	27.2797	1.76048e-07	1.66061e-06
Trp53inp2	1.21874	5.05449	64.1628	1.14553e-15	3.36267e-14
Ier5l	1.21942	0.883127	8.68402	0.00321012	0.0109393
Atox1	1.21973	5.716	57.7472	2.98067e-14	7.36012e-13
Sorbs1	1.22005	3.33578	22.3024	2.32913e-06	1.77942e-05
Naglu	1.22023	8.31182	82.9027	8.61953e-20	3.83515e-18
Dipk2a	1.22171	5.4083	109.135	1.51607e-25	1.17862e-23
Gng5	1.22274	6.37171	67.6959	1.90758e-16	6.19044e-15
Shisa5	1.2243	8.01603	67.8615	1.7539e-16	5.71796e-15
Rpl36	1.22457	7.07345	84.3316	4.18379e-20	1.93452e-18
Zbtb42	1.22835	1.92451	9.72886	0.00181397	0.00666472
Gca	1.2288	3.96628	49.5174	1.9662e-12	3.87461e-11
Creb3l1	1.23003	2.16422	16.6485	4.49864e-05	0.000260439
Ggh	1.23105	5.80263	93.2091	4.70517e-22	2.58037e-20
Rps26	1.2315	7.74007	64.4811	9.74627e-16	2.90316e-14
Pcdhga7	1.23224	1.08336	15.1801	9.77254e-05	0.000517678
Gm10132	1.23297	3.36761	32.218	1.37805e-08	1.55239e-07
Gm15500	1.23405	5.46476	45.1812	1.79623e-11	3.11839e-10
Card11	1.23448	4.23096	36.6715	1.39811e-09	1.8436e-08
Nsa2-ps1	1.23464	2.0791	16.8957	3.94909e-05	0.000232815
Mtss2	1.2347	2.88077	17.5422	2.81e-05	0.000170638
Coro1c	1.23486	6.71171	69.1789	8.9925e-17	3.0439e-15
Rpl23a	1.23664	8.32422	51.6644	6.58466e-13	1.39471e-11
Rpl37	1.23669	7.12253	67.9757	1.65521e-16	5.40868e-15
Tpd52	1.23724	7.68888	61.4944	4.43996e-15	1.21746e-13
Tceal9	1.23859	4.56386	59.05	1.53716e-14	3.95442e-13
Rpl6l	1.23888	4.94455	62.7334	2.36664e-15	6.69713e-14
Rpl28-ps1	1.23926	3.56502	32.0678	1.48884e-08	1.66395e-07
Cadm4	1.24058	3.38743	32.2774	1.33659e-08	1.50809e-07
Scd1	1.24126	2.92229	14.3388	0.000152687	0.000766632
Pea15a	1.24132	8.44778	72.3204	1.82949e-17	6.60345e-16
Sptbn1	1.24144	5.8668	43.5141	4.20919e-11	7.03138e-10
Gm10275	1.24159	5.89006	61.4699	4.49566e-15	1.23035e-13
Il18bp	1.24415	3.32777	19.5489	9.80572e-06	6.56918e-05
Gm5602	1.24489	1.05283	13.0396	0.00030498	0.00140834
Gm5805	1.24516	3.28909	12.2972	0.000453638	0.00198593
Mpeg1	1.24572	12.027	20.2492	6.79834e-06	4.72213e-05
Gm15337	1.24578	0.979158	13.7261	0.000211495	0.00101784
Gm15710	1.24622	2.63918	22.6071	1.98748e-06	1.53834e-05
Cxcl13	1.24652	2.29614	7.50613	0.00614892	0.018938
Adap1	1.24753	6.00604	89.4477	3.14847e-21	1.58533e-19
Gm26947	1.24919	3.89514	39.7613	2.86971e-10	4.24279e-09
Rpl14	1.251	7.83455	64.4001	1.01554e-15	3.01235e-14
Aifm2	1.25218	2.10446	14.5663	0.000135316	0.000687957
Txndc16	1.25255	6.41482	91.3026	1.23296e-21	6.50936e-20
Abcb1b	1.25337	6.04881	77.6701	1.21771e-18	4.86704e-17
Rpl23a-ps3	1.25622	4.00431	47.8497	4.60186e-12	8.64698e-11
Gm8730	1.25661	1.99191	19.394	1.06341e-05	7.07619e-05
Cdkn2b	1.25688	0.258744	11.7524	0.000607636	0.00257178
Rpl39-ps	1.25725	0.668741	11.6903	0.000628277	0.00264647
Gvin2	1.25806	4.33245	40.4457	2.02161e-10	3.0527e-09
Atp6v0c-ps2	1.2584	0.975477	13.1966	0.000280452	0.00130745
Mfsd12	1.26051	6.57904	79.7576	4.23287e-19	1.76149e-17
Kcna7	1.26078	0.569606	10.1931	0.00140967	0.00535592
Adcy4	1.26106	1.99716	8.47063	0.00360926	0.0120755
Eif3f	1.26116	7.52223	96.8806	7.36372e-23	4.4148e-21
Rplp0	1.26201	9.48762	41.544	1.15249e-10	1.79588e-09
Glipr1	1.26201	3.99986	25.187	5.20309e-07	4.51094e-06
Rpl30	1.26267	7.63099	45.0329	1.93754e-11	3.35137e-10
Soat1	1.26279	7.34411	99.3959	2.0675e-23	1.29438e-21
Rpl37a	1.26306	7.78808	62.8487	2.23211e-15	6.35455e-14
Rps2-ps13	1.26409	4.18103	42.2195	8.15842e-11	1.29454e-09
Cdkn1a	1.26617	5.02302	27.8261	1.32726e-07	1.27925e-06
1700003F12Rik	1.26622	2.85748	21.331	3.86434e-06	2.83151e-05
Daam1	1.26778	5.41199	118.131	1.62302e-27	1.45342e-25
Zc2hc1a	1.26917	2.46651	26.0275	3.36583e-07	3.01795e-06
Rps18	1.26942	8.06492	72.1112	2.03403e-17	7.28595e-16
Tecpr1	1.26975	6.77329	91.0188	1.42315e-21	7.43033e-20
Gaa	1.27201	8.12596	102.918	3.49364e-24	2.41129e-22
AW112010	1.27221	3.87002	38.9889	4.26224e-10	6.12249e-09
Gm10073	1.27255	1.6874	14.1356	0.000170094	0.000843261
Dhcr24	1.27332	2.82009	22.896	1.71007e-06	1.34197e-05
Hspa12a	1.27374	4.81658	66.7756	3.04248e-16	9.65203e-15
Dgkz	1.27393	8.22387	94.6917	2.22469e-22	1.26924e-20
Efemp2	1.27593	4.31177	59.4106	1.27977e-14	3.32248e-13
Galns	1.27696	5.31024	46.7852	7.921e-12	1.45174e-10
Gem	1.27699	4.03107	21.1788	4.18369e-06	3.04344e-05
Gm12867	1.27786	0.655077	12.4735	0.000412765	0.00183021
Zfp541	1.2791	0.883463	12.6742	0.000370733	0.00167001
Gm6807	1.27929	1.91117	14.0917	0.000174112	0.000858967
Trerf1	1.27988	2.38714	17.9637	2.25157e-05	0.000139055
Qpct	1.28148	2.1198	14.381	0.000149301	0.000751498
Rpl26	1.28533	8.21265	58.4355	2.1007e-14	5.30764e-13
Rps14	1.28565	8.79603	53.4905	2.59846e-13	5.77168e-12
Rps13-ps1	1.2862	1.02122	13.7734	0.000206235	0.000996157
Lrfn3	1.28637	2.90803	18.9998	1.30735e-05	8.57169e-05
Sdf4	1.28662	8.43004	94.0805	3.0295e-22	1.71458e-20
Gm10335	1.2871	4.90281	61.5934	4.22229e-15	1.16455e-13
Srebf2	1.28807	6.64383	101.25	8.10957e-24	5.38696e-22
Plbd2	1.28886	7.43061	99.399	2.06432e-23	1.29438e-21
Gdap10	1.28929	2.77117	28.9074	7.59241e-08	7.608e-07
Trem2	1.28946	10.9565	29.3741	5.96695e-08	6.07821e-07
Dubr	1.28984	3.25921	30.7876	2.87866e-08	3.08328e-07
Crppa	1.28999	0.0720733	11.3157	0.000768526	0.00316009
Prelid2	1.29015	2.05147	16.6659	4.45741e-05	0.000258263
Gper1	1.29113	1.57057	7.29107	0.00692982	0.021003
Idi1	1.293	2.42594	18.2901	1.89689e-05	0.000119604
Hcst	1.29341	3.3599	30.5339	3.28091e-08	3.48772e-07
Rpl39	1.29558	6.61945	83.3459	6.88804e-20	3.0888e-18
Tmed3	1.29566	7.05418	110.687	6.92847e-26	5.53847e-24
Tmem106a	1.29658	6.10122	57.2212	3.89458e-14	9.55017e-13
Dll1	1.29715	2.57215	17.46	2.93413e-05	0.000177338
Trps1	1.29973	3.95748	42.6147	6.66562e-11	1.07275e-09
F830016B08Rik	1.30063	3.90637	20.1545	7.14337e-06	4.93032e-05
Rpl5	1.3019	8.93134	52.5155	4.26855e-13	9.27738e-12
Rpl17	1.30284	6.42144	18.02	2.18593e-05	0.000135712
Rps3a3	1.30504	1.1557	16.5964	4.62399e-05	0.000266279
Lamc1	1.30519	4.90555	81.2277	2.01148e-19	8.62438e-18
Alkbh2	1.30604	3.75124	50.5742	1.14741e-12	2.34946e-11
Cd34	1.30727	8.1356	101.693	6.48428e-24	4.34816e-22
Gm10288	1.30729	1.54334	15.4137	8.63602e-05	0.000462495
Gm11263	1.31001	-0.169857	5.69322	0.0170306	0.0446068
Slc25a25	1.31171	5.54043	66.1346	4.21151e-16	1.30437e-14
Rpl10-ps5	1.31392	1.31336	14.8807	0.000114531	0.000594458
Cd300lb	1.31442	3.25139	8.07331	0.00449219	0.0145396
Rttn	1.31497	4.88277	84.1012	4.70074e-20	2.15167e-18
Rpl19	1.31872	8.68055	61.4319	4.58326e-15	1.2519e-13
Vkorc1	1.31966	5.95844	94.7603	2.14892e-22	1.23598e-20
Tnik	1.32091	0.666954	12.6645	0.000372659	0.00167797
Crip1	1.32123	3.56218	9.62332	0.00192122	0.00701325
Ifi208	1.32259	1.22339	12.309	0.000450775	0.00197584
Ogfod3	1.32297	3.8214	45.5625	1.47844e-11	2.61155e-10
Kcnq3	1.32378	0.406783	10.1558	0.00143851	0.0054494
Gm5424	1.32403	1.2626	7.58923	0.00587179	0.0182033
Akap1	1.32466	5.38255	64.7045	8.70137e-16	2.60838e-14
Prickle1	1.32613	4.00044	46.5962	8.72304e-12	1.5864e-10
Shisa7	1.32774	3.85229	47.8306	4.64673e-12	8.71971e-11
Il12rb2	1.32824	3.47279	37.472	9.27349e-10	1.26285e-08
Rpl36a	1.33306	6.82306	85.7331	2.05936e-20	9.64828e-19
Rps15a-ps6	1.33311	0.667575	12.3809	0.000433744	0.00191265
Tuba4a	1.33456	3.36217	27.5613	1.52191e-07	1.45497e-06
Timp2	1.33516	10.0115	44.0499	3.20112e-11	5.4373e-10
Sdf2l1	1.33573	6.8773	83.343	6.89843e-20	3.0888e-18
Slc15a3	1.33616	8.06242	76.2484	2.50139e-18	9.67699e-17
Gm4204	1.33702	4.15007	51.4284	7.4255e-13	1.56344e-11
Siglecf	1.3372	6.18116	81.3569	1.8842e-19	8.12791e-18
Rps5	1.33752	8.3494	62.1489	3.18437e-15	8.9219e-14
Creb3l2	1.33823	6.051	60.9427	5.87609e-15	1.57762e-13
Bst2	1.33839	7.06705	68.356	1.36493e-16	4.52279e-15
LOC115487221	1.33856	0.567679	12.2384	0.000468159	0.00203752
Gm4332	1.33967	3.43612	37.3873	9.6849e-10	1.31686e-08
H3c15	1.34215	-0.0529139	8.22866	0.0041234	0.0135679
Bri3bp	1.34632	5.29898	74.7518	5.33767e-18	2.00325e-16
Rpl36a-ps2	1.34697	2.90129	29.8352	4.7037e-08	4.88998e-07
Rpl38	1.3471	6.36676	55.1755	1.10233e-13	2.56105e-12
H2bc6	1.34733	2.17711	15.6292	7.70537e-05	0.000416671
Cd244a	1.34776	3.43384	38.5062	5.45813e-10	7.73043e-09
Rab3d	1.34897	3.71262	32.0111	1.53298e-08	1.70923e-07
Smco4	1.3493	1.71642	19.4006	1.05971e-05	7.05595e-05
Fam107a	1.35177	2.85291	24.8868	6.07972e-07	5.20084e-06
Pcdhgb1	1.35245	1.61102	17.4211	2.99478e-05	0.000180445
Gm10369	1.35502	0.192526	11.5436	0.00067983	0.00283744
AY512915	1.35593	-0.332717	6.92004	0.00852349	0.0249377
Gm52698	1.35616	0.481235	14.8031	0.000119342	0.000615817
Zfp503	1.35855	1.83916	18.7881	1.46079e-05	9.4941e-05
Phf11b	1.35976	5.08694	67.2695	2.36817e-16	7.58081e-15
Gm46591	1.36111	1.38859	16.4874	4.89743e-05	0.000279636
Perp	1.36303	3.21128	22.9401	1.67126e-06	1.31414e-05
Slc8a2	1.36397	1.01658	16.3141	5.36632e-05	0.000302985
Tspo	1.36531	5.96428	59.3629	1.3112e-14	3.39162e-13
Akt3	1.36601	6.2006	98.3452	3.51452e-23	2.14341e-21
Rpl23	1.36615	7.90278	69.7975	6.57171e-17	2.24597e-15
Rps18-ps4	1.37215	0.24895	12.9984	0.000311761	0.0014359
Plekhm2	1.37257	7.18632	181.221	2.62308e-41	5.45795e-39
Gm10155	1.37355	0.104594	10.2102	0.00139669	0.0053166
P3h4	1.37358	3.12691	30.9204	2.68825e-08	2.89909e-07
Spryd7	1.37419	4.08728	51.8382	6.02682e-13	1.29007e-11
Egr2	1.37508	5.47047	27.0939	1.93812e-07	1.81246e-06
Itgad	1.3756	-0.0471698	9.29156	0.00230212	0.00824416
Fgr	1.37594	4.97949	22.1576	2.51154e-06	1.9095e-05
Gm7331	1.37619	0.772353	14.8534	0.000116197	0.000601564
Nrp1	1.37647	8.65431	80.9066	2.36647e-19	1.00853e-17
Slc16a3	1.37696	6.53125	70.0764	5.70513e-17	1.96883e-15
H2-Ab1	1.37711	8.18906	20.8842	4.87901e-06	3.50066e-05
Gpc4	1.37935	0.75322	5.50984	0.0189097	0.0485051
Nfil3	1.38022	3.96827	19.8355	8.43999e-06	5.74398e-05
Gab3	1.38066	2.53127	26.6262	2.46879e-07	2.26972e-06
Rps27a-ps2	1.38275	1.69064	19.2057	1.17364e-05	7.73806e-05
Rps12-ps3	1.3846	6.35089	66.4248	3.63497e-16	1.14038e-14
Nrap	1.38514	1.53763	17.0439	3.65248e-05	0.000216774
Nr4a3	1.3854	1.44045	8.60301	0.00335608	0.0113628
Gm11808	1.38689	6.31602	58.7563	1.78461e-14	4.55784e-13
Eef1a1-ps1	1.3895	1.18878	14.4374	0.000144893	0.000731394
Crem	1.39141	3.48465	34.7059	3.8347e-09	4.73449e-08
H2-Q4	1.39198	7.01916	70.0815	5.69041e-17	1.96855e-15
Gm14681	1.39314	2.3377	25.8135	3.76044e-07	3.33374e-06
Prr5l	1.3956	4.43663	49.0019	2.55715e-12	4.9905e-11
Fasn	1.39583	5.9354	111.379	4.88715e-26	4.02025e-24
Cd274	1.39863	6.36696	141.194	1.4592e-32	1.79532e-30
Aldoa	1.39889	9.32949	42.9762	5.54102e-11	9.0531e-10
Usp12	1.39936	8.19445	123.27	1.21685e-28	1.15552e-26
Ctsl	1.40153	10.5553	29.7503	4.91441e-08	5.07547e-07
Zfand2a	1.40191	5.6683	96.126	1.07801e-22	6.35529e-21
4930512H18Rik	1.40267	0.209859	10.0478	0.00152532	0.00573679
Gm6136	1.40282	6.04714	101.059	8.92747e-24	5.8751e-22
Gm32438	1.40384	0.834194	14.5958	0.000133211	0.000679206
Grasp	1.40442	1.8378	18.3141	1.87316e-05	0.000118319
Dna2	1.41184	4.54655	92.8356	5.68227e-22	3.0804e-20
Speg	1.41302	5.91061	95.8155	1.26107e-22	7.34272e-21
Pwwp2b	1.41362	4.04642	81.601	1.66529e-19	7.24991e-18
Gbp2	1.41377	4.3165	17.8344	2.40991e-05	0.00014793
Gm8129	1.4145	0.141939	9.32585	0.00225944	0.00810361
Mt1	1.41569	5.7024	67.5152	2.09072e-16	6.75377e-15
Rpl32	1.41747	7.96493	81.2816	1.95736e-19	8.41785e-18
Rpl17-ps9	1.41799	0.0903827	11.2215	0.000808544	0.00330543
Mdfic	1.41878	4.6388	44.7694	2.21662e-11	3.82475e-10
Rpsa	1.41926	8.89723	58.371	2.17064e-14	5.46484e-13
Gm10443	1.41941	2.91943	27.2289	1.80737e-07	1.70143e-06
Erc1	1.41982	2.31492	18.0739	2.12492e-05	0.000132622
Ddah1	1.42133	0.599337	10.4999	0.00119384	0.00462658
Dmc1	1.42188	-0.150572	13.8533	0.000197651	0.000961351
Runx2	1.42339	1.73472	12.3473	0.000441623	0.00194355
Cxcr6	1.42394	0.650737	13.5305	0.000234713	0.00111854
Rps27	1.42395	7.01339	51.5286	7.05612e-13	1.48788e-11
Tent5c	1.42411	8.67891	99.7031	1.77046e-23	1.13349e-21
St8sia4	1.42413	5.57482	63.8225	1.36149e-15	3.94748e-14
Hexa	1.42473	10.4635	42.9825	5.52306e-11	9.03419e-10
Adgrg3	1.42567	1.04321	8.93828	0.00279255	0.00972718
Uba52	1.42656	8.00157	76.5939	2.09985e-18	8.18477e-17
Rpl10a-ps1	1.42949	2.9189	37.0295	1.16356e-09	1.55901e-08
Ppp1r3e	1.42971	1.73023	20.0677	7.47465e-06	5.14642e-05
Rspo1	1.42983	2.57968	28.8445	7.84265e-08	7.84209e-07
Gm44040	1.43216	0.17466	15.8079	7.01083e-05	0.000383441
Ly6c2	1.43496	2.07432	6.72304	0.00951751	0.0274284
Synj2	1.43532	5.82583	104.5	1.57223e-24	1.12351e-22
Agap1	1.43562	4.80076	38.0953	6.73734e-10	9.37332e-09
Ifi209	1.43568	5.08088	37.2941	1.0159e-09	1.37419e-08
Gpm6b	1.43635	4.07146	30.1348	4.03029e-08	4.23345e-07
Cadm1	1.43869	8.01645	126.2	2.77985e-29	2.80944e-27
Galc	1.43885	6.67892	116.806	3.16607e-27	2.78241e-25
Npc2	1.4411	9.84653	53.6177	2.43554e-13	5.4354e-12
Bex3	1.4416	3.26923	38.1884	6.42342e-10	8.97186e-09
Ropn1l	1.4437	1.12923	18.4217	1.77031e-05	0.000112475
H3c14	1.44515	0.508242	16.8599	4.02418e-05	0.000236356
Usp30	1.4464	5.78131	89.0781	3.79521e-21	1.9042e-19
Rps28	1.44712	6.41788	61.0358	5.60471e-15	1.50762e-13
Rpl9-ps6	1.44719	5.26378	75.2638	4.11838e-18	1.56642e-16
Stx3	1.44736	3.87612	57.4384	3.4873e-14	8.58118e-13
Wfdc17	1.44861	4.24743	8.33457	0.00388976	0.0129132
Aldh2	1.44888	7.15424	83.3973	6.71149e-20	3.03389e-18
Pcdhga4	1.44974	3.0058	42.9175	5.70968e-11	9.29647e-10
Nek5	1.45143	1.40231	21.319	3.88858e-06	2.84632e-05
Vps13c	1.45176	7.57092	163.172	2.29453e-37	3.73165e-35
Hacd2	1.45381	5.64529	104.401	1.65207e-24	1.17463e-22
Slfn9	1.45421	4.24832	47.7604	4.81611e-12	9.00173e-11
Stk32c	1.45475	0.0641828	8.68678	0.00320526	0.0109254
Gm12164	1.45503	0.467097	16.1817	5.75459e-05	0.00032259
Hmgn3	1.45558	3.69405	65.5802	5.57972e-16	1.70513e-14
Dnajb14	1.45563	6.93432	160.162	1.0427e-36	1.63924e-34
Rpl21-ps15	1.4557	6.77617	89.8694	2.54413e-21	1.30424e-19
Gvin1	1.45582	4.18675	40.9199	1.58595e-10	2.42329e-09
Cxcl9	1.45755	2.24447	14.1183	0.000171663	0.000848955
Cd300lf	1.45769	4.47463	9.07296	0.00259417	0.00911695
Gm13680	1.46216	3.15134	35.2433	2.90978e-09	3.6631e-08
Mt2	1.46364	2.51116	14.2343	0.000161402	0.00080553
AA414768	1.46403	1.74892	18.9702	1.32775e-05	8.69336e-05
Rell1	1.46475	4.85877	89.455	3.13695e-21	1.58517e-19
Mcam	1.46618	3.20354	10.3247	0.00131259	0.00503438
Atf3	1.46775	7.4355	53.3495	2.79177e-13	6.16237e-12
Gpd2	1.46854	3.8073	54.1063	1.89933e-13	4.27924e-12
Pdyn	1.47091	0.890672	9.06589	0.00260422	0.0091432
Cyp51	1.4721	4.70122	75.0148	4.67206e-18	1.76751e-16
Plekhb1	1.47318	2.87265	15.0571	0.000104306	0.000548637
Tlr2	1.4746	8.08402	96.3552	9.60149e-23	5.73213e-21
Fth1	1.47542	10.7843	23.1882	1.46899e-06	1.16834e-05
Gm26728	1.47579	2.54246	23.5746	1.20161e-06	9.74304e-06
Nat8l	1.47671	5.60437	113.937	1.34518e-26	1.1397e-24
Gm8995	1.47714	8.22782	66.9286	2.81527e-16	8.97147e-15
Fam78b	1.48208	1.2164	13.6226	0.000223479	0.00107005
Oas2	1.48323	5.26388	35.6607	2.34856e-09	3.00179e-08
Scd2	1.48386	8.16089	102.711	3.87713e-24	2.66298e-22
9330175E14Rik	1.48412	0.28684	8.70929	0.00316593	0.0108147
Gm52775	1.48458	1.09255	17.279	3.2273e-05	0.000193405
Ddx31	1.48513	5.75213	90.7868	1.60019e-21	8.29346e-20
Eef1a1	1.4864	12.4384	23.4538	1.27951e-06	1.03156e-05
Gm45855	1.48951	2.2808	23.8125	1.06188e-06	8.7099e-06
Mx1	1.49149	5.00302	49.9405	1.58476e-12	3.17604e-11
Slc44a1	1.49257	6.46007	115.584	5.8629e-27	5.05818e-25
Tnf	1.49352	5.18837	15.6789	7.50582e-05	0.000407677
Sp100	1.49815	6.1698	90.1969	2.15599e-21	1.11332e-19
Milr1	1.49902	5.11114	79.9876	3.76769e-19	1.57254e-17
Cd69	1.49952	1.21934	13.7735	0.000206219	0.000996157
Clic4	1.50248	5.7737	25.9506	3.50263e-07	3.1287e-06
TrnN	1.50426	0.956747	15.8563	6.83373e-05	0.000374914
Rims2	1.50452	-0.188748	8.66701	0.00324022	0.0110233
Gm9794	1.50706	6.70779	87.1527	1.00456e-20	4.85101e-19
B3gnt7	1.51077	3.17104	40.0074	2.53006e-10	3.77216e-09
Capn1	1.51212	4.54814	74.8366	5.11331e-18	1.92415e-16
Gm15880	1.51227	2.98014	33.6652	6.54624e-09	7.81627e-08
Gm10677	1.51333	0.931612	20.4936	5.98322e-06	4.20758e-05
Ccl6	1.51821	8.26095	39.2069	3.81191e-10	5.52045e-09
Rps24-ps3	1.52136	0.393747	17.5957	2.73212e-05	0.000166337
Thy1	1.52156	0.607521	10.979	0.000921489	0.00370297
Gm36897	1.5222	1.44172	20.202	6.96812e-06	4.82584e-05
Chst11	1.52352	6.92715	152.491	4.94837e-35	7.14434e-33
Zc3h12d	1.52356	1.31403	16.4783	4.9211e-05	0.000280647
Ifi213	1.52364	4.81453	50.6906	1.08135e-12	2.22708e-11
Ctsz	1.52393	11.0419	37.6645	8.40209e-10	1.15419e-08
Tigar	1.52591	3.92389	76.2469	2.5032e-18	9.67699e-17
Dram1	1.52694	1.48175	12.6384	0.000377906	0.001698
Fkbp10	1.52787	0.188635	16.4991	4.86741e-05	0.000278146
Rpsa-ps10	1.52893	4.77994	79.584	4.62155e-19	1.912e-17
Pebp1	1.52946	6.45034	77.5699	1.28109e-18	5.07737e-17
Ube2l6	1.53184	4.88269	68.9427	1.01369e-16	3.39873e-15
Abca5	1.53188	2.68061	29.7748	4.85249e-08	5.02462e-07
Rtkn2	1.53259	-0.0324447	12.8408	0.000339139	0.0015459
Plaur	1.53485	5.60452	41.6385	1.09809e-10	1.71678e-09
H2-T-ps	1.53506	1.43224	19.8992	8.1634e-06	5.56645e-05
Gm28809	1.53578	2.22334	25.0829	5.49168e-07	4.73503e-06
Anxa2	1.53953	5.22478	8.20081	0.00418717	0.013733
Gm12070	1.53973	1.56205	21.5069	3.52553e-06	2.59941e-05
Pgk1	1.54026	7.3307	48.214	3.82154e-12	7.23842e-11
Ydjc	1.55186	1.73345	19.328	1.10081e-05	7.29868e-05
Gpi1	1.55384	8.27213	87.6935	7.64269e-21	3.72884e-19
Osbpl3	1.55487	4.5866	124.477	6.62546e-29	6.37712e-27
Marchf3	1.55951	2.89426	44.2626	2.87144e-11	4.90676e-10
Insig1	1.56031	4.96815	104.8	1.35139e-24	9.85606e-23
Myh10	1.56292	5.29013	93.1896	4.75169e-22	2.59582e-20
Rtp4	1.56646	5.05615	67.725	1.87962e-16	6.11374e-15
Cd83	1.56744	8.12781	110.512	7.56702e-26	5.98762e-24
Pcdhb22	1.56891	3.26785	58.0442	2.56288e-14	6.39546e-13
Cd72	1.57027	5.14208	56.7428	4.96711e-14	1.20342e-12
Prdx4	1.57512	5.33863	137.802	8.05234e-32	9.41592e-30
B2m	1.57654	11.4054	38.0659	6.83957e-10	9.50619e-09
Gm11703	1.57674	3.2892	53.3856	2.74102e-13	6.06928e-12
Lrguk	1.579	5.44012	91.777	9.70168e-22	5.14116e-20
Rtcb	1.58063	7.57756	131.259	2.17289e-30	2.3116e-28
Creg2	1.58308	1.30747	8.86017	0.00291461	0.0100754
H2-K1	1.5845	9.62176	53.3508	2.78996e-13	6.16237e-12
Gm7336	1.58511	3.54884	37.5782	8.78215e-10	1.20173e-08
H2-Aa	1.59154	8.24978	23.1828	1.47311e-06	1.17095e-05
H3c4	1.59583	0.0703778	17.4961	2.87897e-05	0.000174602
Fgf2	1.59762	4.32891	83.572	6.14358e-20	2.79503e-18
H2ac7	1.60091	0.0178873	13.1136	0.000293167	0.00136135
Isg15	1.60186	3.76976	28.7217	8.35634e-08	8.32047e-07
Megf9	1.60208	3.40738	61.8323	3.73988e-15	1.03553e-13
Cnn3	1.60237	2.95608	33.636	6.64513e-09	7.92097e-08
Gm30712	1.60825	0.561984	15.0903	0.000102486	0.000540266
Cd22	1.613	6.11898	140.75	1.82502e-32	2.18833e-30
Gnptab	1.61319	6.48966	183.693	7.5709e-42	1.67376e-39
H1f2	1.61426	5.77192	22.8814	1.72307e-06	1.34993e-05
Cd68	1.62773	9.81133	66.1339	4.21298e-16	1.30437e-14
Prnp	1.6292	4.24942	43.2586	4.79632e-11	7.92794e-10
Gm15682	1.62953	2.89008	38.6094	5.17682e-10	7.36149e-09
Rpl41	1.63178	8.15856	52.6275	4.03195e-13	8.80371e-12
Lrpap1	1.63191	7.79599	86.0209	1.78047e-20	8.39729e-19
Mrc2	1.63589	8.39342	141.923	1.01092e-32	1.26579e-30
Gm36043	1.64434	2.24248	26.3968	2.78001e-07	2.53443e-06
Trim72	1.6452	1.18302	25.4181	4.61559e-07	4.04622e-06
Eml2	1.6529	3.73609	63.2893	1.78467e-15	5.12197e-14
Gtf3c4	1.65304	6.90873	127.135	1.73586e-29	1.76696e-27
Gm16071	1.65684	1.03153	17.8739	2.36041e-05	0.000145206
Gpr153	1.65698	1.75532	23.5591	1.21136e-06	9.80526e-06
Ifit3b	1.66428	2.66731	23.7339	1.10619e-06	9.05754e-06
Cmpk2	1.66485	3.44763	33.0618	8.92769e-09	1.0337e-07
Pkm	1.66778	9.56959	50.5551	1.15864e-12	2.3656e-11
Gucy2g	1.67145	-0.238538	12.6008	0.000385582	0.0017285
Kbtbd11	1.67476	3.77758	57.1882	3.96033e-14	9.67716e-13
Gyg	1.67659	5.52486	86.879	1.15365e-20	5.49598e-19
Akap5	1.6769	4.41403	84.0956	4.71425e-20	2.15167e-18
Hsf4	1.68126	1.36105	21.9031	2.86766e-06	2.15135e-05
Cep170b	1.6851	2.14382	20.4699	6.05754e-06	4.25773e-05
Gcnt2	1.69058	6.19621	105.415	9.90496e-25	7.37607e-23
Tcim	1.69075	4.69723	99.5758	1.88795e-23	1.20327e-21
Stat1	1.69172	7.71249	102.344	4.66708e-24	3.15954e-22
Dio2	1.6926	1.36934	14.9104	0.000112743	0.000586345
Stard4	1.69474	3.54261	68.1044	1.55066e-16	5.09055e-15
Gm11545	1.6977	4.60172	116.248	4.195e-27	3.6639e-25
Tyrobp	1.69784	9.98768	61.0365	5.60255e-15	1.50762e-13
H2bc4	1.69958	5.45167	48.6319	3.08803e-12	5.93649e-11
Gm13456	1.70056	4.04782	87.6822	7.68626e-21	3.73721e-19
Gm34643	1.70714	0.369033	12.8486	0.000337736	0.001541
Tmem151a	1.70896	2.13784	16.9556	3.8264e-05	0.000226716
Tpi1	1.71	7.65432	72.574	1.60885e-17	5.83681e-16
Uck2	1.71195	2.58406	32.1678	1.41419e-08	1.58678e-07
Rpl10-ps1	1.71253	1.05893	23.2764	1.40311e-06	1.12162e-05
Phf11a	1.71616	2.41634	26.1019	3.23871e-07	2.91319e-06
Gm5820	1.71644	1.12464	19.0526	1.27164e-05	8.34141e-05
LOC118568604	1.71692	-0.0999097	13.3993	0.000251723	0.00119009
Ndufa1	1.71825	4.44527	81.0435	2.20801e-19	9.4384e-18
Rpl34-ps1	1.72079	5.54365	28.4625	9.55287e-08	9.4125e-07
Gm5431	1.72567	4.44478	104.013	2.00996e-24	1.40787e-22
Cybb	1.72702	7.05354	36.1586	1.81896e-09	2.36984e-08
Fyn	1.73157	5.28696	176.559	2.73387e-40	5.52593e-38
B230217C12Rik	1.73228	0.598563	21.924	2.83666e-06	2.13262e-05
Prkg1	1.73726	3.30955	47.723	4.9091e-12	9.16343e-11
Gusb	1.73907	9.1561	91.778	9.69675e-22	5.14116e-20
Gbp4	1.74339	2.8974	21.999	2.72795e-06	2.05635e-05
Tcf24	1.74957	2.56641	32.7776	1.0333e-08	1.18382e-07
H1f4	1.75087	1.05169	13.0037	0.000310872	0.00143231
Irf7	1.75253	5.20039	47.2898	6.12312e-12	1.13547e-10
Dgki	1.7542	1.08597	22.2981	2.33442e-06	1.78154e-05
Gm34189	1.76268	3.05699	51.0178	9.15317e-13	1.89617e-11
Adcy3	1.76345	4.7739	157.327	4.3419e-36	6.75094e-34
Col3a1	1.76364	-0.0918804	13.0758	0.000299143	0.001385
Eepd1	1.76465	5.15246	102.495	4.32375e-24	2.95539e-22
Tsc22d1	1.76956	5.72346	108.898	1.70874e-25	1.31397e-23
Shcbp1l	1.77222	1.77614	34.0639	5.33321e-09	6.41663e-08
Nim1k	1.77358	0.791309	21.0545	4.46412e-06	3.2358e-05
Gm26797	1.77932	1.41262	25.6368	4.121e-07	3.6329e-06
Fndc4	1.78024	2.89472	37.3178	1.00366e-09	1.35892e-08
Ttyh2	1.78128	4.60811	99.365	2.10001e-23	1.30895e-21
4930486L24Rik	1.78326	1.90129	35.7401	2.25478e-09	2.88976e-08
Gla	1.78942	4.47695	27.0859	1.94612e-07	1.81874e-06
Samd9l	1.78993	5.24769	57.7126	3.03346e-14	7.47742e-13
Serpine1	1.79269	5.63444	56.7012	5.07322e-14	1.22493e-12
Il27ra	1.79303	1.28579	18.9431	1.34676e-05	8.80558e-05
Enpp1	1.79666	4.81073	156.698	5.96006e-36	9.16618e-34
Ctsb	1.79866	12.5429	32.8806	9.79946e-09	1.12726e-07
Gm4951	1.79947	4.28198	54.1313	1.87529e-13	4.2318e-12
Zfp9	1.8012	0.132388	22.4763	2.12758e-06	1.63515e-05
5730552O08Rik	1.80282	0.383581	22.8597	1.74263e-06	1.36299e-05
Reps2	1.80611	2.98652	44.2747	2.85383e-11	4.88256e-10
Lrrc14b	1.80792	1.39081	27.4232	1.6346e-07	1.55221e-06
Synpo	1.82217	1.9507	25.745	3.89632e-07	3.44988e-06
Rpl21	1.82253	6.73732	50.2578	1.34816e-12	2.72502e-11
Prr15	1.826	2.09351	33.8713	5.88811e-09	7.05426e-08
Alcam	1.82719	3.92019	16.0932	6.0299e-05	0.000336026
Plxnc1	1.83343	4.21519	20.2619	6.75326e-06	4.69311e-05
Gm40106	1.83787	-0.0962568	19.9776	7.83552e-06	5.37135e-05
C2	1.83973	3.10043	50.5161	1.18193e-12	2.40968e-11
Got1	1.84159	6.13853	156.558	6.39477e-36	9.72899e-34
Pdzrn3	1.8435	0.223985	13.7547	0.000208303	0.00100464
Bcl2	1.84897	4.64717	103.93	2.09617e-24	1.46102e-22
Oasl1	1.84921	2.64103	23.6519	1.15434e-06	9.39742e-06
Dgat2	1.85629	1.86702	23.0489	1.57936e-06	1.24909e-05
Fgl2	1.86121	6.48181	87.1275	1.01744e-20	4.89177e-19
Ifitm3	1.86338	5.88127	31.499	1.99539e-08	2.18859e-07
Cd63	1.86697	8.95114	88.1678	6.01314e-21	2.95417e-19
Ptpru	1.86827	1.85102	27.3793	1.67209e-07	1.58356e-06
Optn	1.8724	3.93718	99.3229	2.14508e-23	1.33117e-21
Ly9	1.87272	7.20032	226.867	2.87557e-51	9.46197e-49
Cpd	1.87501	7.77153	123.335	1.17787e-28	1.12606e-26
Atp6v0e2	1.87773	1.30276	23.8202	1.05768e-06	8.68043e-06
Socs2	1.88088	2.52488	34.5332	4.1904e-09	5.13134e-08
Gng12	1.88843	7.22084	184.598	4.80261e-42	1.0786e-39
Tmem154	1.89709	4.37209	167.444	2.67638e-38	4.56242e-36
Serpine2	1.89844	10.0348	88.6848	4.63e-21	2.30669e-19
Gm6166	1.90417	0.213739	6.45913	0.0110384	0.031143
Apoc1	1.91231	0.25726	15.3686	8.8446e-05	0.000472742
Tpi-rs11	1.91274	0.169273	22.091	2.60021e-06	1.97162e-05
TrnW	1.9128	-0.165935	11.6219	0.00065181	0.0027315
Rassf3	1.91502	6.72225	174.475	7.79406e-40	1.51066e-37
Glb1	1.91529	7.46265	190.068	3.07249e-43	7.36824e-41
Rsad2	1.91816	3.642	23.1973	1.46204e-06	1.16412e-05
LOC118567435	1.91957	0.145785	20.248	6.80262e-06	4.72278e-05
Adarb1	1.92196	5.9556	173.464	1.2964e-39	2.41352e-37
Mocos	1.92603	2.77041	15.8467	6.8686e-05	0.000376535
Antxr2	1.92643	3.83737	25.4838	4.46103e-07	3.91801e-06
Fmn1	1.92696	5.134	132.388	1.23061e-30	1.3819e-28
Gm10561	1.92919	-0.131653	17.0199	3.69899e-05	0.00021935
Nptxr	1.93034	1.38073	26.4295	2.73328e-07	2.49504e-06
Dpp7	1.93239	6.95725	154.226	2.06659e-35	3.04585e-33
LOC118568759	1.93761	1.92747	34.826	3.60521e-09	4.46283e-08
Satb2	1.94029	2.26772	41.0703	1.46854e-10	2.25607e-09
Ctsd	1.94612	14.223	26.8656	2.18112e-07	2.01967e-06
Selenom	1.94799	3.40912	47.8267	4.65619e-12	8.72588e-11
Gpr65	1.94963	5.29036	136.59	1.4822e-31	1.71898e-29
Ifit1	1.95556	3.42151	33.1359	8.59352e-09	1.00074e-07
Ephx1	1.96031	6.01577	171.613	3.28829e-39	5.88936e-37
Apbb2	1.96047	6.14539	141.065	1.55716e-32	1.89934e-30
Arrdc4	1.97007	5.80386	139.152	4.08066e-32	4.85187e-30
H2-D1	1.97081	10.6544	64.3154	1.06013e-15	3.12494e-14
LOC118568312	1.97368	11.1534	8.71085	0.00316322	0.0108081
Gm7609	1.97819	0.323578	11.3494	0.000754719	0.00311509
Helz2	1.97954	5.2282	57.9877	2.63766e-14	6.53594e-13
H2bc3	1.98348	-0.590508	11.8961	0.000562503	0.00240014
Nlrc3	1.99118	2.71002	49.4738	2.01043e-12	3.95627e-11
Plekha6	1.99312	1.94024	25.3292	4.83341e-07	4.21627e-06
F630206G17Rik	2.00486	0.194022	16.7572	4.24815e-05	0.000247456
Gm12474	2.01036	2.02814	31.8275	1.68494e-08	1.86982e-07
Anxa5	2.013	7.04281	59.9218	9.87012e-15	2.6006e-13
Stum	2.0167	0.600877	20.5448	5.82508e-06	4.11272e-05
Crlf2	2.02058	8.08802	148.725	3.29405e-34	4.56936e-32
Gm39518	2.02109	2.16596	36.0783	1.8955e-09	2.46276e-08
Kcnj2	2.02424	7.829	143.186	5.35265e-33	7.01246e-31
Cxcr4	2.02489	5.2115	15.8697	6.78576e-05	0.000372572
Ccrl2	2.02919	5.97927	42.2622	7.98208e-11	1.2704e-09
Hbb-y	2.04112	2.35646	5.86682	0.0154289	0.0409883
Pld3	2.0437	8.87939	115.135	7.35329e-27	6.26757e-25
LOC118567924	2.04512	5.47298	102.436	4.45433e-24	3.03001e-22
LOC118568508	2.04529	-0.164972	23.4592	1.27592e-06	1.02924e-05
Vat1	2.06169	6.34268	39.7814	2.84042e-10	4.20388e-09
Tgtp2	2.06313	3.19673	32.6274	1.11632e-08	1.27584e-07
Gm12163	2.06616	-0.452729	19.269	1.13533e-05	7.49945e-05
Ntn3	2.06802	0.0164898	24.7586	6.49772e-07	5.53499e-06
Pdzk1ip1	2.06882	0.454097	28.909	7.58614e-08	7.6071e-07
Ifit3	2.06969	5.22049	71.4831	2.79643e-17	9.81804e-16
5930430L01Rik	2.07811	1.22693	28.1847	1.10272e-07	1.07677e-06
Serpinb6b	2.07933	1.44944	20.4186	6.22215e-06	4.35828e-05
Gnas	2.08835	10.2828	77.6345	1.23983e-18	4.92761e-17
Tafa3	2.09207	1.46172	34.4522	4.36858e-09	5.33313e-08
Plau	2.09346	8.20775	97.479	5.44297e-23	3.29113e-21
Capg	2.09416	6.67806	55.7259	8.33127e-14	1.95164e-12
Trib3	2.09872	0.730636	21.8722	2.91433e-06	2.18058e-05
Rap2b	2.09979	5.84762	120.941	3.93759e-28	3.6896e-26
Masp1	2.10123	5.33077	210.288	1.18874e-47	3.50407e-45
Il1r1	2.10683	3.88111	107.951	2.75565e-25	2.08501e-23
Ccl4	2.11213	7.55638	71.7639	2.42548e-17	8.60103e-16
Cd74	2.11578	10.0518	38.4152	5.71865e-10	8.04437e-09
Rgs11	2.1311	3.81202	91.0308	1.41455e-21	7.41277e-20
Arhgap26	2.13888	4.11137	119.519	8.06227e-28	7.40734e-26
Cxcl14	2.14472	4.0208	22.8552	1.7468e-06	1.36549e-05
Etv4	2.1448	2.18504	54.8368	1.30968e-13	3.01311e-12
C030034L19Rik	2.14485	2.19961	33.8532	5.94298e-09	7.11398e-08
Cd52	2.14959	7.2638	153.235	3.4031e-35	4.96396e-33
H2-Q5	2.15085	3.80831	66.2348	4.00282e-16	1.24749e-14
Cpe	2.16019	5.15026	36.0211	1.95194e-09	2.5268e-08
Kif5a	2.16031	5.91265	9.85989	0.00168921	0.0062692
Ppm1j	2.16162	2.15244	49.6703	1.81878e-12	3.59413e-11
Slc16a8	2.16297	2.10283	35.7078	2.29242e-09	2.93533e-08
Treml2	2.17159	5.59473	195.957	1.59298e-44	4.02483e-42
Nlrc5	2.17326	6.00922	91.043	1.40584e-21	7.39449e-20
Iqcg	2.18018	1.3314	34.0878	5.26819e-09	6.3492e-08
Cdk18	2.18287	4.15167	62.0791	3.2993e-15	9.20745e-14
Lrfn4	2.1914	2.31529	50.3008	1.31898e-12	2.67422e-11
Mif	2.19459	6.46966	105.203	1.10236e-24	8.12356e-23
Hectd2	2.20554	3.82913	125.545	3.8672e-29	3.85024e-27
Ifi207	2.21652	5.57951	86.0974	1.71287e-20	8.10546e-19
Igsf10	2.22367	2.83603	79.6068	4.56842e-19	1.89556e-17
Usp18	2.22879	4.64341	95.095	1.81467e-22	1.05229e-20
Gpr137c	2.24599	2.46398	43.2789	4.74663e-11	7.86417e-10
Tmem205	2.24823	3.40427	88.502	5.07842e-21	2.52121e-19
Ifi211	2.24952	3.41859	44.4199	2.64977e-11	4.53893e-10
Rftn1	2.25772	5.76009	132.088	1.43148e-30	1.58234e-28
Ramp1	2.2596	5.98996	200.164	1.92286e-45	5.03826e-43
Ptk7	2.26848	1.23249	31.9838	1.55467e-08	1.73068e-07
Lilrb4a	2.276	7.76092	50.3004	1.31925e-12	2.67422e-11
Rxrg	2.27834	3.57639	135.973	2.02214e-31	2.32611e-29
Arhgap24	2.28304	5.52278	173.727	1.13551e-39	2.14217e-37
Abca8b	2.28727	-0.0337363	29.6414	5.1984e-08	5.3376e-07
H4c12	2.28833	-0.000478772	30.1259	4.0488e-08	4.24974e-07
Iigp1	2.29155	3.65651	29.7626	4.88322e-08	5.05064e-07
Adssl1	2.297	6.2404	127.356	1.55265e-29	1.60353e-27
Ccl3	2.30865	7.33092	104.723	1.40496e-24	1.01943e-22
Phlda1	2.31145	2.79961	25.7035	3.98101e-07	3.52046e-06
C3	2.31273	5.32873	26.0095	3.39739e-07	3.04046e-06
Slc2a6	2.31833	4.23739	70.8127	3.92809e-17	1.36893e-15
Ifi204	2.32285	5.99691	110.458	7.77659e-26	6.11283e-24
Asb10	2.32601	5.55359	110.956	6.05068e-26	4.89206e-24
Lars2	2.34946	7.52884	12.6004	0.000385672	0.0017285
Olfr111	2.36009	6.87194	92.7869	5.82398e-22	3.14517e-20
Mcoln2	2.36488	0.848853	9.11589	0.00253399	0.0089477
LOC118568626	2.37989	3.48664	84.2186	4.42991e-20	2.03503e-18
Tmem202	2.38259	0.641824	30.0401	4.23212e-08	4.42574e-07
Pdgfc	2.38566	2.44724	52.5727	4.14608e-13	9.02505e-12
Gm13889	2.38656	5.58752	77.9351	1.06483e-18	4.28021e-17
Mrgpre	2.39733	4.63983	239.151	6.02251e-54	2.13031e-51
Gvin3	2.39883	6.09427	155.248	1.23584e-35	1.84062e-33
Slfn5	2.4081	6.21436	94.982	1.92122e-22	1.10952e-20
Adamts1	2.40864	6.20306	79.5206	4.77228e-19	1.9686e-17
Oas1a	2.42254	5.4261	104.655	1.45386e-24	1.04952e-22
Ifit2	2.42407	5.8637	93.7565	3.56829e-22	1.9877e-20
Plekhh2	2.4243	5.33081	183.473	8.45712e-42	1.81303e-39
Tnfsf8	2.42487	5.40474	260.295	1.47971e-58	5.98183e-56
Gm30757	2.43111	0.170112	30.0799	4.1461e-08	4.34221e-07
Gm41914	2.44028	0.757807	23.0223	1.6013e-06	1.26362e-05
Gm34194	2.44516	-0.368441	24.3561	8.00745e-07	6.71591e-06
Ptger4	2.44657	4.26568	80.5152	2.88482e-19	1.2148e-17
Fgf13	2.45388	4.21441	163.275	2.17812e-37	3.58351e-35
Btla	2.45985	2.52728	42.8554	5.8939e-11	9.5634e-10
LOC118568088	2.47282	1.23686	38.1577	6.52501e-10	9.0958e-09
Sdc3	2.47754	8.94075	160.996	6.85526e-37	1.08983e-34
Il3ra	2.4802	4.87307	205.226	1.51167e-46	4.11319e-44
Inf2	2.48366	5.28742	45.5576	1.48216e-11	2.61485e-10
Ldlr	2.49197	5.21516	133.5	7.02785e-31	7.95496e-29
Gm4841	2.49866	0.906889	24.6803	6.76736e-07	5.73705e-06
Fzd9	2.51462	0.768798	26.62	2.47666e-07	2.27411e-06
Hcar2	2.51876	6.58495	42.849	5.91317e-11	9.58367e-10
St14	2.52509	7.04304	309.901	2.29509e-69	1.24897e-66
Clec1a	2.52519	3.21723	80.7847	2.51698e-19	1.06945e-17
Rasl11a	2.52556	0.157972	21.7871	3.04638e-06	2.26859e-05
Rab11fip4	2.53244	4.42695	172.783	1.82532e-39	3.31108e-37
Zbp1	2.5523	4.50374	86.9369	1.12037e-20	5.35543e-19
Gm30845	2.56019	2.1675	59.6483	1.13419e-14	2.9663e-13
Ripk4	2.56068	-0.360494	24.5984	7.06112e-07	5.97893e-06
Myo5a	2.57149	7.36626	224.932	7.59855e-51	2.44345e-48
LOC68395	2.57439	2.75068	46.3432	9.92495e-12	1.79118e-10
Arap2	2.57789	5.63788	189.039	5.15425e-43	1.21546e-40
H2-Q6	2.59452	2.43009	36.5838	1.46242e-09	1.92481e-08
Sox5	2.59931	0.911675	35.3949	2.69196e-09	3.41602e-08
Klrb1c	2.6079	0.974459	39.6056	3.10787e-10	4.55681e-09
Hif1a	2.60793	8.97794	213.359	2.54152e-48	7.65105e-46
Gm32854	2.61267	1.06817	44.0824	3.14833e-11	5.35406e-10
9130214F15Rik	2.61539	0.761452	31.153	2.38475e-08	2.58955e-07
Dab1	2.62464	0.880125	46.346	9.91109e-12	1.79118e-10
Olfr110	2.62941	3.5119	107.529	3.40826e-25	2.5515e-23
Nbl1	2.6296	4.96269	233.399	1.08167e-52	3.73283e-50
Aplp2	2.63279	8.77376	183.127	1.00606e-41	2.12458e-39
Olfr114	2.63344	-0.087714	28.5255	9.24721e-08	9.13041e-07
Gm36304	2.63553	0.178267	36.8902	1.24973e-09	1.66189e-08
Lrrc27	2.64546	2.56975	69.8637	6.35486e-17	2.17712e-15
Rai14	2.6491	4.74137	64.9193	7.80297e-16	2.35404e-14
Slc45a3	2.65276	1.45591	36.964	1.20328e-09	1.60615e-08
Col9a2	2.65365	1.68603	49.4233	2.06283e-12	4.05374e-11
Sh3pxd2b	2.66863	5.5408	69.9595	6.05338e-17	2.07887e-15
1500009C09Rik	2.66949	0.485352	36.3143	1.67928e-09	2.19595e-08
Psat1	2.70245	7.2866	294.365	5.56395e-66	2.71463e-63
Tox2	2.70655	2.16861	54.5452	1.51914e-13	3.46682e-12
LOC118567875	2.71505	1.6986	45.5361	1.4985e-11	2.6371e-10
Hs3st1	2.73027	1.55611	36.2583	1.72822e-09	2.25369e-08
Atp10a	2.73109	3.65787	59.1717	1.44496e-14	3.73079e-13
Nexn	2.73485	3.39662	104.637	1.46697e-24	1.05361e-22
Sulf2	2.7537	6.29143	194.671	3.03938e-44	7.41451e-42
Bambi	2.75626	3.06684	85.0792	2.86643e-20	1.32974e-18
Ifi206	2.77287	3.24117	78.8333	6.75795e-19	2.75557e-17
Fabp5	2.7779	6.53443	7.19035	0.00732966	0.0220092
Dact1	2.78177	3.52359	174.229	8.82365e-40	1.68711e-37
Gas2l3	2.78637	4.74011	146.161	1.1971e-33	1.61312e-31
Oas1g	2.79867	3.55804	78.8782	6.60598e-19	2.70139e-17
Oas3	2.80927	3.94152	67.3714	2.24883e-16	7.21512e-15
Cacna1a	2.80955	6.56157	313.329	4.11271e-70	2.32763e-67
H2-Q7	2.82176	2.66917	60.1385	8.84108e-15	2.34256e-13
Zfp618	2.82319	0.652088	34.1307	5.15316e-09	6.22116e-08
Cdkn2a	2.83418	1.46374	49.839	1.66896e-12	3.32593e-11
Chst10	2.85317	4.24603	148.383	3.91225e-34	5.37422e-32
Sv2b	2.85344	-0.176949	32.6027	1.13058e-08	1.29004e-07
H1f3	2.85435	1.86511	21.8301	2.97897e-06	2.22425e-05
H2-Q9	2.85861	1.51583	48.3733	3.52333e-12	6.70047e-11
Oasl2	2.88785	6.07841	103.482	2.62835e-24	1.82297e-22
S100b	2.89119	2.23227	33.0739	8.87236e-09	1.02813e-07
Cacnb4	2.90229	2.54273	102.274	4.835e-24	3.25764e-22
Gvin-ps6	2.91225	-0.23952	34.081	5.28647e-09	6.36581e-08
Cpq	2.92567	5.50347	449.239	1.0562e-99	1.35857e-96
Nceh1	2.92927	6.90524	178.89	8.46869e-41	1.73657e-38
F2r	2.94139	1.40787	31.6024	1.89199e-08	2.08694e-07
Galnt9	2.94329	0.91577	43.1189	5.15109e-11	8.47475e-10
Cdo1	2.95906	1.46628	46.4092	9.59636e-12	1.73853e-10
Ak4	2.96176	2.6198	30.3424	3.62132e-08	3.83232e-07
Slc4a11	2.96533	0.505571	22.2865	2.34854e-06	1.79038e-05
Klrb1a	2.96733	-0.0642402	41.43	1.2217e-10	1.89331e-09
Ghr	2.97542	2.05131	64.7833	8.36046e-16	2.51151e-14
Lgals3bp	2.9784	9.94158	204.443	2.24084e-46	5.9822e-44
Ifi27l2a	2.99184	5.69975	146.037	1.27445e-33	1.70115e-31
Maff	2.9921	4.00142	70.894	3.76939e-17	1.31687e-15
Efna5	3.00007	1.26781	65.962	4.59698e-16	1.41705e-14
C77080	3.01531	3.57213	33.5852	6.82088e-09	8.08957e-08
St8sia6	3.01648	5.92369	334.672	9.23288e-75	6.5318e-72
Gm45969	3.03892	1.66104	64.208	1.11952e-15	3.29315e-14
Olfr112	3.06324	0.471343	55.7343	8.29565e-14	1.94652e-12
LOC118567557	3.06758	0.445571	48.1106	4.02834e-12	7.60975e-11
LOC118568792	3.08985	1.27558	50.2486	1.35452e-12	2.73007e-11
Kdf1	3.09796	0.0688046	48.6655	3.03565e-12	5.85967e-11
Gm16183	3.13218	2.37816	96.3215	9.76614e-23	5.80593e-21
Ptchd1	3.13608	6.45166	125.533	3.89133e-29	3.85024e-27
Phlda3	3.13828	2.68139	63.5355	1.57504e-15	4.53875e-14
Rftn2	3.1443	2.6411	94.6955	2.22047e-22	1.26924e-20
Gbp6	3.16766	3.51258	100.383	1.25627e-23	8.1912e-22
Pdcd1	3.17135	5.50537	142.226	8.67839e-33	1.10622e-30
Gm52546	3.17479	3.41953	188.581	6.48812e-43	1.50493e-40
Pkp2	3.1794	1.02296	27.194	1.84031e-07	1.73013e-06
Gm2065	3.20417	3.19482	141.448	1.28391e-32	1.59351e-30
Fam20c	3.20987	6.74277	74.8874	4.98345e-18	1.88029e-16
Tmem51	3.2449	3.65768	68.1222	1.53672e-16	5.05652e-15
Lingo1	3.26592	0.363247	35.3323	2.77989e-09	3.52128e-08
Ifi44	3.2675	3.03558	57.9977	2.62426e-14	6.51416e-13
4930597O21Rik	3.26868	0.0290885	36.9877	1.18877e-09	1.59129e-08
Gm13391	3.27455	4.68628	325.888	7.5581e-73	5.09236e-70
Bhlhe40	3.27813	5.93414	38.4617	5.58397e-10	7.89287e-09
Igf1os	3.2928	-0.385073	31.6936	1.80514e-08	1.99695e-07
Adora1	3.29927	3.64196	183.587	7.98654e-42	1.73849e-39
4930556M19Rik	3.30845	1.48457	61.3912	4.67888e-15	1.274e-13
Zbtb16	3.3147	2.68161	128.399	9.17806e-30	9.61929e-28
Lpl	3.31693	8.7934	51.106	8.75104e-13	1.82086e-11
Pacsin1	3.31804	4.98913	316.808	7.17972e-71	4.23274e-68
Bcar3	3.32056	3.51939	125.495	3.96585e-29	3.89672e-27
Ascl4	3.34791	-0.256318	38.6689	5.02139e-10	7.15485e-09
Klrb1b	3.34893	3.54036	104.1	1.92326e-24	1.36061e-22
Sel1l3	3.35753	1.91673	31.602	1.89239e-08	2.08694e-07
Ahnak2	3.37196	3.3586	23.899	1.01526e-06	8.35654e-06
Kynu	3.37986	2.90774	99.5103	1.95146e-23	1.23264e-21
Fgf1	3.38522	4.48588	275.846	6.03775e-62	2.51259e-59
LOC118568405	3.39676	-0.0368122	46.0298	1.16466e-11	2.08592e-10
Npas4	3.40384	1.29639	45.4064	1.60112e-11	2.81069e-10
Armc2	3.44523	2.09553	69.4072	8.0096e-17	2.73079e-15
Gas7	3.46479	5.73231	171.381	3.6949e-39	6.53489e-37
Gabre	3.47341	0.89841	73.196	1.17393e-17	4.30309e-16
Rragd	3.48846	4.57029	318.042	3.86731e-71	2.37907e-68
Gm5182	3.49676	3.81706	303.268	6.39289e-68	3.23046e-65
Plxna2	3.49844	3.10663	54.4657	1.58188e-13	3.59838e-12
Kif1a	3.50238	5.3455	119.028	1.03241e-27	9.42422e-26
Aldh1a1	3.51629	1.83488	74.102	7.41826e-18	2.76942e-16
2900052N01Rik	3.55337	1.59023	66.7353	3.10521e-16	9.80707e-15
Tcap	3.55631	1.94924	99.784	1.69953e-23	1.09303e-21
Myo1e	3.57311	7.73601	239.859	4.22043e-54	1.53115e-51
Wipf3	3.58377	2.67375	115.81	5.23161e-27	4.54123e-25
Robo2	3.60811	0.403452	51.6179	6.74248e-13	1.426e-11
Clec7a	3.61484	8.64767	121.632	2.77826e-28	2.62064e-26
Flt1	3.62795	6.63615	75.6431	3.39864e-18	1.29966e-16
Olfr98	3.64564	-0.584584	37.5407	8.95245e-10	1.22267e-08
Xylt1	3.67685	4.20872	195.308	2.20699e-44	5.47836e-42
Cd28	3.68914	3.02036	54.7164	1.39242e-13	3.1931e-12
Apoe	3.70232	13.6024	72.2443	1.90137e-17	6.82804e-16
Gm41823	3.71117	-0.357399	45.329	1.66562e-11	2.91591e-10
Cpeb1	3.71226	4.34036	276.736	3.86204e-62	1.65588e-59
Atp1a3	3.72936	7.54315	292.984	1.11289e-65	5.24874e-63
A430093F15Rik	3.75473	2.01952	113.752	1.4767e-26	1.24368e-24
Kcnh2	3.77083	3.84747	82.8048	9.05698e-20	4.01716e-18
Gm44026	3.77934	-0.268619	38.9347	4.38225e-10	6.28211e-09
Gm30873	3.79388	-0.482814	48.2474	3.75703e-12	7.12577e-11
Axl	3.80788	9.22753	223.892	1.28048e-50	4.0261e-48
LOC115488490	3.83863	-0.294347	56.3719	5.99813e-14	1.43357e-12
Cd5	3.85955	3.27995	198.098	5.43165e-45	1.39732e-42
Cd200r4	3.88829	4.82285	108.539	2.04772e-25	1.5577e-23
Ldlrad3	3.89882	4.10855	165.657	6.57226e-38	1.09401e-35
Arnt2	3.90734	5.17999	364.471	2.99302e-81	2.49108e-78
Efr3b	3.93727	5.42336	357.073	1.22158e-79	9.09694e-77
Corin	3.97077	0.875678	64.4699	9.80203e-16	2.91363e-14
Cck	3.97124	2.7932	118.503	1.34557e-27	1.21264e-25
Chst2	3.97596	6.72883	698.753	5.58183e-154	2.63258e-150
Slc6a16	3.98612	-0.133558	37.7731	7.947e-10	1.09807e-08
Colec12	3.99314	4.93248	101.649	6.62863e-24	4.42399e-22
Csf1	4.00113	8.62637	232.675	1.55586e-52	5.24141e-50
Fam189a2	4.00943	2.81863	144.653	2.55709e-33	3.38134e-31
Gm15283	4.01566	0.334373	64.3494	1.04199e-15	3.07788e-14
A930002C04Rik	4.01853	0.189669	70.0296	5.84204e-17	2.01117e-15
Rab7b	4.02604	5.87175	99.3067	2.16273e-23	1.33626e-21
Ppp1r3c	4.02769	2.25879	83.2115	7.37289e-20	3.29082e-18
Gm32914	4.03083	0.0547456	33.1913	8.35244e-09	9.74267e-08
2310034O05Rik	4.0473	0.438177	81.5028	1.75011e-19	7.57259e-18
Acaca	4.07302	6.77767	895.368	9.9712e-197	1.41082e-192
Ank	4.15008	9.22912	452.346	2.2262e-100	3.14986e-97
Gpr31c	4.19519	-0.756319	39.8777	2.70374e-10	4.01149e-09
Cox6a2	4.24517	4.98126	486.937	6.61049e-108	1.03924e-104
Serpina3n	4.24901	-0.249729	59.0371	1.54729e-14	3.97326e-13
Cd6	4.28708	-0.229568	62.6665	2.44848e-15	6.9011e-14
Scml4	4.30928	0.835959	71.8788	2.28829e-17	8.15543e-16
C330008A17Rik	4.33125	0.0316896	52.2342	4.92597e-13	1.06085e-11
Egln3	4.35746	5.54771	89.0633	3.82387e-21	1.9118e-19
Ctla2a	4.36124	2.63585	53.6139	2.44025e-13	5.43734e-12
Igfbp5	4.40062	4.43573	146.737	8.95985e-34	1.21897e-31
Fbn2	4.43428	1.45922	113.345	1.81359e-26	1.50944e-24
Itgax	4.45509	9.3193	131.407	2.01755e-30	2.1791e-28
Fxyd6	4.50066	2.38391	142.952	6.02101e-33	7.74466e-31
Minar1	4.51315	5.2686	392.889	1.94541e-87	1.83504e-84
Gm9899	4.62398	-0.193907	49.6854	1.80485e-12	3.57158e-11
Ch25h	4.6737	5.79293	175.396	4.90703e-40	9.77881e-38
BC021767	4.70208	1.47229	61.1775	5.21534e-15	1.41093e-13
Dpys	4.78581	-0.310441	65.5894	5.55373e-16	1.70086e-14
Prrg3	4.83371	0.451976	55.0304	1.18677e-13	2.74373e-12
Sox7	4.9672	3.30083	111.583	4.40868e-26	3.64786e-24
Cfap161	5.02857	1.44216	60.4492	7.55006e-15	2.008e-13
Cspg4	5.05734	5.53465	309.435	2.8997e-69	1.51955e-66
Igf1	5.07156	7.3964	169.005	1.22023e-38	2.1055e-36
Tmem178	5.0753	2.52462	125.138	4.74854e-29	4.63359e-27
Actr3b	5.07998	4.39084	244.334	4.46301e-55	1.66177e-52
Abi3bp	5.09618	2.39682	135.858	2.14306e-31	2.44533e-29
Chst3	5.12548	3.16568	222.304	2.84321e-50	8.74535e-48
Ctse	5.1408	5.40317	430.345	1.367e-95	1.48782e-92
Asb11	5.17314	1.227	91.0049	1.43319e-21	7.45523e-20
Lox	5.1874	5.60564	290.262	4.35975e-65	1.98987e-62
Rn7sk	5.2132	5.77636	27.7093	1.40981e-07	1.35328e-06
Mcoln3	5.27075	2.42831	56.5162	5.57382e-14	1.34122e-12
Serpinb1c	5.33171	0.85029	97.5265	5.31394e-23	3.22691e-21
Dcstamp	5.4944	3.8838	52.4177	4.48654e-13	9.69162e-12
Kcnk3	5.50611	2.14252	82.163	1.25315e-19	5.48941e-18
Etl4	5.51334	6.05529	500.507	7.37346e-111	1.30409e-107
Trpm6	5.56302	2.35664	113.695	1.5198e-26	1.2724e-24
Hpse	5.7084	6.45746	143.07	5.67563e-33	7.36738e-31
Rpph1	5.78564	4.18433	28.3363	1.01964e-07	1.00048e-06
Trpc4	5.80853	2.14879	104.962	1.2452e-24	9.12866e-23
Gm1673	6.01707	4.49965	277.134	3.1633e-62	1.39867e-59
Cited4	6.12794	2.93904	149.728	1.98777e-34	2.78464e-32
Pianp	6.13756	5.67596	357.323	1.07759e-79	8.47049e-77
Mamdc2	6.14234	7.19002	31.4698	2.02567e-08	2.21836e-07
Fabp3	6.18097	4.35145	405.46	3.56685e-90	3.60481e-87
Hectd2os	6.35304	0.338803	93.6107	3.84098e-22	2.12289e-20
Rgs16	6.43844	4.84152	205.866	1.0963e-46	3.04148e-44
Kcnk9	6.5078	5.3298	788.18	2.00419e-173	1.41786e-169
Rmrp	6.64461	3.68173	20.8248	5.0326e-06	3.60538e-05
Tmem163	6.78064	3.77421	376.989	5.62898e-84	4.97778e-81
Lgi2	6.97115	5.35768	324.155	1.80217e-72	1.15904e-69
Cst7	7.11336	9.89084	512.134	2.17715e-113	4.40065e-110
Apoc4	7.15151	2.00672	70.9042	3.75003e-17	1.31335e-15
Baiap2l2	7.60185	6.42791	577.146	1.5665e-127	3.69407e-124
Ctnna3	7.71033	2.12663	208.822	2.48245e-47	7.16819e-45
Yipf7	7.79157	1.06525	109.206	1.46231e-25	1.1431e-23
Gfap	7.79343	6.2636	603.861	2.42086e-133	6.85056e-130
Trpm1	8.32453	4.33761	605.315	1.16896e-133	4.13491e-130
Dkk2	8.88536	5.41956	446.031	5.27224e-99	6.21641e-96
Wif1	9.54807	1.31842	107.573	3.33373e-25	2.50899e-23
Apod	-1.0004	1.75404	5.85478	0.0155348	0.0412231
Foxp3	-1.00095	0.197188	6.38845	0.0114865	0.0322275
Per3	-1.00389	5.32745	10.4359	0.0012359	0.00476998
Cfap74	-1.00434	6.707	49.6999	1.79156e-12	3.55025e-11
Hjurp	-1.00536	6.63906	46.3194	1.00467e-11	1.81083e-10
Zfp658	-1.00558	6.12951	38.383	5.81373e-10	8.16057e-09
Chsy1	-1.0079	6.75348	83.4648	6.4861e-20	2.9414e-18
Fcrlb	-1.00802	1.44924	6.1811	0.0129122	0.0354609
Gm33747	-1.01126	1.22921	9.86136	0.00168787	0.00626814
LOC118567423	-1.0113	0.379067	7.446	0.00635777	0.0195048
Pdss1	-1.01141	3.00892	21.7184	3.15751e-06	2.34149e-05
Lefty1	-1.01205	3.19045	21.8034	3.02067e-06	2.253e-05
1500015A07Rik	-1.01449	1.34969	6.9186	0.00853037	0.0249527
Pomk	-1.01509	3.94417	42.8055	6.04623e-11	9.78811e-10
P2ry12	-1.01526	11.2991	16.0678	6.11158e-05	0.000339775
Emp3	-1.01563	3.75297	15.2363	9.48617e-05	0.000503828
Znrf1	-1.0161	6.85781	63.5801	1.53978e-15	4.44619e-14
Kazald1	-1.01649	0.210178	6.05944	0.0138322	0.0374926
Gm46775	-1.01657	0.501474	8.03891	0.00457832	0.014766
Mir142b	-1.0167	1.24785	7.67115	0.00561106	0.0175101
Gm46218	-1.01672	1.39442	6.44507	0.0111261	0.0313405
Il17ra	-1.01704	7.60472	60.5729	7.0905e-15	1.8929e-13
Arhgef10l	-1.01837	4.98134	52.6017	4.08545e-13	8.90679e-12
Gm10384	-1.01854	3.72318	22.7062	1.88756e-06	1.46501e-05
Gm46165	-1.01944	0.489358	6.4931	0.0108294	0.0306327
Celf4	-1.02205	2.22199	10.32	0.00131596	0.00504456
Efnb1	-1.02212	5.20828	48.5283	3.25562e-12	6.22484e-11
Timp3	-1.02259	3.12478	8.06085	0.0045232	0.0146183
Wnk3	-1.02356	1.23757	6.87476	0.00874216	0.0254617
Nbeal2	-1.02395	7.21776	49.3883	2.09993e-12	4.12093e-11
4931402G19Rik	-1.02421	0.911267	9.54864	0.00200098	0.00726505
Smpdl3b	-1.02471	3.40184	24.049	9.39147e-07	7.80728e-06
Nr1d1	-1.02615	3.51571	13.95	0.000187739	0.000918696
LOC118567870	-1.02772	2.42743	9.36487	0.00221183	0.007949
0610005C13Rik	-1.02911	0.485091	7.98713	0.00471111	0.0151077
6330409D20Rik	-1.02932	0.935962	7.63434	0.00572675	0.0178122
Chrnb2	-1.03044	1.19844	8.65818	0.00325596	0.0110662
Gab1	-1.03107	6.13098	39.3828	3.48352e-10	5.08651e-09
Etv1	-1.03179	4.73292	37.7849	7.89915e-10	1.09252e-08
Cd1d1	-1.03207	3.34809	24.7345	6.57955e-07	5.59796e-06
Gm26634	-1.03268	0.271721	5.88068	0.0153079	0.040751
Dbn1	-1.0327	0.463276	5.6507	0.0174484	0.0454153
Gm6277	-1.03535	3.87961	30.4178	3.48309e-08	3.69432e-07
Palm	-1.03708	1.96875	11.14	0.000844879	0.00343216
Lrrc25	-1.03819	5.86603	71.6221	2.60618e-17	9.19572e-16
T2	-1.03838	-0.0852747	5.92875	0.0148958	0.039879
Kcnab3	-1.03979	0.953734	8.8165	0.00298518	0.0102817
Arl4d	-1.03982	1.93355	12.3002	0.000452911	0.00198336
Itga2b	-1.04169	0.0345485	7.94837	0.00481306	0.015369
Zfhx3	-1.04252	7.94667	40.4706	1.996e-10	3.01724e-09
Mdfi	-1.0426	4.47644	47.1396	6.61053e-12	1.22105e-10
Cttn	-1.04272	1.00539	5.72259	0.016748	0.0439803
Ly6g6d	-1.04312	0.670106	7.44061	0.00637684	0.0195506
Gm52147	-1.04321	2.82384	15.7427	7.25668e-05	0.000395511
Klk8	-1.04386	5.65418	45.5441	1.49241e-11	2.62965e-10
Pde4b	-1.04427	4.44732	25.3278	4.8369e-07	4.21672e-06
Gm10615	-1.04532	0.483049	7.12841	0.0075872	0.0226815
Nrip1	-1.04618	7.51363	45.8906	1.25046e-11	2.22831e-10
Clcf1	-1.04637	5.57554	41.8442	9.88412e-11	1.55562e-09
Otulinl	-1.04648	8.36822	51.9338	5.74028e-13	1.23059e-11
Nfasc	-1.04841	2.52185	7.03457	0.00799509	0.0236361
Hrh2	-1.04842	4.41438	39.7591	2.87297e-10	4.24281e-09
Kcnj12	-1.04894	3.88798	27.3541	1.69401e-07	1.60004e-06
Ttc9	-1.04943	4.04375	42.3122	7.78074e-11	1.23975e-09
Izumo4	-1.04993	3.73946	34.5853	4.07971e-09	5.0064e-08
Ccdc152	-1.05024	1.24507	8.84979	0.00293122	0.0101255
Gm13421	-1.0503	1.36157	8.89427	0.00286067	0.0099205
Ltc4s	-1.05082	7.35036	84.3093	4.23118e-20	1.95006e-18
Ttll7	-1.05086	1.28467	6.64622	0.00993664	0.0285064
Aoah	-1.05108	2.39351	11.8772	0.000568268	0.00242174
E330020D12Rik	-1.05139	3.25855	26.7424	2.32468e-07	2.1428e-06
Gm3558	-1.05157	1.14986	8.25473	0.0040646	0.0134087
Fgfr2	-1.05958	1.35453	7.10623	0.00768163	0.0229009
Kiss1r	-1.06226	1.65497	9.24446	0.00236209	0.00841026
Scarf1	-1.0637	2.10398	13.1058	0.000294389	0.00136657
Ly6g5b	-1.06483	0.733309	7.79978	0.00522526	0.0165064
Col27a1	-1.06577	8.55777	43.434	4.38509e-11	7.28224e-10
Gm35658	-1.06691	2.59447	13.8265	0.000200491	0.000971487
Gm11423	-1.06865	1.62324	10.8502	0.000987836	0.00393383
Fcrl1	-1.06945	5.29161	63.487	1.61432e-15	4.6425e-14
4833418N02Rik	-1.07004	1.89099	12.6635	0.000372855	0.00167797
Scamp5	-1.07044	8.0868	56.4905	5.64699e-14	1.35582e-12
Sult4a1	-1.0723	1.44637	8.95424	0.00276827	0.00964734
Gm41130	-1.07304	0.861857	8.34148	0.00387501	0.0128673
Ahrr	-1.07304	1.50625	10.4942	0.00119752	0.00463957
Plxnb1	-1.07324	2.32994	9.08753	0.00257358	0.00905135
Csad	-1.07343	6.41641	73.9043	8.19988e-18	3.04515e-16
Akr1c13	-1.07356	0.141077	7.10879	0.00767071	0.0228779
Pnma2	-1.0743	0.332636	5.82759	0.0157767	0.0417398
Gm3052	-1.07514	3.40255	13.2989	0.000265566	0.00124709
B430209F14Rik	-1.07694	1.95223	12.4655	0.000414531	0.00183689
Vipr1	-1.07798	4.13291	27.4834	1.58446e-07	1.50764e-06
Gm30908	-1.07844	0.73741	8.58984	0.00338044	0.0114316
Ccm2l	-1.07987	1.32406	8.32735	0.00390525	0.0129586
Cd163	-1.08101	4.29073	28.0716	1.16909e-07	1.13843e-06
Gprasp2	-1.08114	5.04349	51.4023	7.52514e-13	1.57972e-11
Pde2a	-1.08289	7.154	40.2115	2.27906e-10	3.42318e-09
Snn	-1.08527	7.6304	98.7298	2.8942e-23	1.77273e-21
Tcf7l2	-1.08622	4.3111	41.469	1.19756e-10	1.85793e-09
Cdkl4	-1.08635	1.06986	8.45296	0.0036445	0.012179
4933417D19Rik	-1.08718	0.200465	7.17544	0.00739083	0.0221788
Itgae	-1.08718	2.96018	13.2353	0.000274726	0.00128372
Gm33869	-1.08799	4.01705	26.5445	2.57539e-07	2.35547e-06
Ermap	-1.08847	3.17224	29.1863	6.5744e-08	6.65134e-07
Ccdc39	-1.08989	3.15881	22.4281	2.18161e-06	1.67304e-05
Arrdc3	-1.09049	5.36348	39.877	2.70476e-10	4.01149e-09
Gm46816	-1.09118	3.15752	20.4194	6.21971e-06	4.35828e-05
Gm3264	-1.09145	4.2394	31.4997	1.99476e-08	2.18859e-07
Myo1g	-1.09146	5.89802	41.4968	1.18067e-10	1.83373e-09
Sox4	-1.09192	6.57751	89.9638	2.42557e-21	1.24798e-19
LOC118568707	-1.09219	2.4942	15.9222	6.59995e-05	0.000363074
Slc16a2	-1.09221	2.10479	6.22494	0.0125963	0.0347092
Vtn	-1.09224	2.34056	6.3097	0.0120079	0.0333989
Adam4	-1.09324	0.983163	8.41454	0.00372232	0.0124127
Eef2k	-1.09353	7.60027	49.8697	1.64298e-12	3.27878e-11
Ushbp1	-1.09361	0.375678	5.91535	0.0150095	0.0401303
Mpi	-1.09403	5.5109	56.1764	6.62509e-14	1.57016e-12
Map4k2	-1.09441	6.91982	66.1258	4.23046e-16	1.30692e-14
Gm36109	-1.09494	1.37941	5.61772	0.0177797	0.0461334
Fam228b	-1.09718	1.62314	12.0249	0.000524953	0.00225762
Olfml2b	-1.09753	5.05394	53.5521	2.51821e-13	5.60221e-12
Gm31619	-1.09869	3.18025	19.282	1.12766e-05	7.45227e-05
Nup210l	-1.09907	2.13731	12.3845	0.000432915	0.00190998
Eps8l2	-1.09908	0.757489	5.55332	0.0184456	0.0475646
Abhd15	-1.09951	6.22176	35.2924	2.83735e-09	3.58443e-08
Klhdc8b	-1.10064	6.11663	61.514	4.39597e-15	1.2099e-13
Pla2g2d	-1.10157	1.686	9.10905	0.00254347	0.00897223
Zc2hc1c	-1.10166	0.248473	8.98854	0.00271677	0.00950535
Maf	-1.10196	8.8417	51.6117	6.76381e-13	1.42838e-11
Rnase12	-1.10225	-0.142044	6.87407	0.00874553	0.0254662
LOC115487216	-1.10359	0.62444	7.95571	0.00479359	0.0153276
Slc4a8	-1.10473	0.444273	6.9315	0.00846904	0.0247938
Id3	-1.10521	0.992862	6.06281	0.0138058	0.0374479
Irs3	-1.10565	0.499122	10.0714	0.00150586	0.00567264
Lrrc4	-1.10745	2.04968	15.0791	0.000103099	0.000543092
Gm21057	-1.10782	1.68187	10.886	0.000968946	0.0038684
Cdh23	-1.10828	5.97333	36.3552	1.64439e-09	2.1543e-08
Gm32620	-1.10999	-0.0336655	6.76931	0.00927385	0.026792
1700001C19Rik	-1.11085	1.32081	10.4599	0.00121991	0.0047134
Gm33470	-1.11146	0.800626	8.87714	0.00288763	0.00999684
Rbfaos	-1.11221	0.706273	7.39056	0.0065567	0.0200196
Ephb6	-1.11305	0.491288	5.8868	0.0152548	0.0406443
LOC118568295	-1.11366	0.91526	9.75488	0.00178847	0.00658644
Nlrp1b	-1.11386	7.19901	27.8888	1.28495e-07	1.241e-06
Plppr4	-1.11403	2.04426	9.8421	0.00170563	0.00631422
Gbp7	-1.11527	5.5467	31.4413	2.05564e-08	2.24944e-07
Gm39000	-1.11537	1.02838	10.3697	0.00128099	0.00492653
Scube1	-1.11703	3.11852	24.4478	7.63489e-07	6.43396e-06
Arid3b	-1.11866	6.07553	60.0032	9.47038e-15	2.50461e-13
Grtp1	-1.1187	0.481341	8.96929	0.00274556	0.00958946
Spns3	-1.11885	3.53911	21.2552	4.02028e-06	2.93514e-05
Gabbr1	-1.11941	7.04044	60.1898	8.6136e-15	2.28656e-13
Gm32133	-1.12022	0.489963	8.5563	0.00344329	0.0116091
Rxfp1	-1.12522	2.47966	6.52378	0.0106442	0.0301812
Cirbp	-1.12527	6.43872	58.7403	1.79917e-14	4.58674e-13
Bmp1	-1.12529	3.33417	33.123	8.65077e-09	1.00658e-07
Gm15706	-1.12567	1.29448	10.1982	0.00140581	0.0053441
Slamf1	-1.12618	2.26033	18.0989	2.09717e-05	0.000131122
Ephb3	-1.12691	3.04238	24.9241	5.96321e-07	5.11354e-06
Ano7	-1.12739	3.81541	38.6876	4.97371e-10	7.10121e-09
4930581F22Rik	-1.12761	2.75462	20.6751	5.44189e-06	3.8731e-05
Gm12708	-1.12815	0.696787	8.32103	0.00391888	0.012987
Snta1	-1.12821	6.3568	55.5528	9.09804e-14	2.11724e-12
Gm15950	-1.1285	-0.215017	6.4725	0.0109557	0.0309343
Gm34058	-1.12862	0.0557132	7.60559	0.00581878	0.018073
Ramp2	-1.12987	0.787304	6.23119	0.012552	0.0346262
Gpd1	-1.12999	3.35308	25.2624	5.00377e-07	4.35147e-06
Mamld1	-1.1303	2.51396	17.5536	2.79316e-05	0.000169688
Rd3	-1.13108	0.0083911	5.99887	0.0143151	0.0385651
Mir7115	-1.13347	3.36988	19.7145	8.99177e-06	6.0743e-05
Tm6sf1	-1.13413	6.74103	79.3582	5.18114e-19	2.13104e-17
Gm9949	-1.13417	2.53448	13.7954	0.000203829	0.000986651
Gm2897	-1.1347	0.335259	8.01393	0.00464188	0.0149442
Emilin1	-1.13529	1.82691	6.55569	0.0104549	0.02974
4933439K11Rik	-1.13591	-0.194355	6.4743	0.0109446	0.0309221
Gm4356	-1.13642	1.49815	11.1541	0.000838477	0.00341006
Ntsr2	-1.13837	1.03251	6.6521	0.00990389	0.0284182
Acvr2b	-1.13844	6.02674	36.5507	1.48744e-09	1.95593e-08
Mfsd6	-1.14038	1.51599	8.04126	0.00457236	0.0147502
Abcc9	-1.14041	0.470869	8.83398	0.00295673	0.0101936
Mrc1	-1.14044	6.50056	30.6598	3.0747e-08	3.28084e-07
Camkk1	-1.14061	4.39769	69.2715	8.58019e-17	2.9113e-15
Ptgds	-1.14215	3.24618	14.2631	0.000158955	0.000794818
Gm36851	-1.14241	2.10841	10.0279	0.00154189	0.00578988
Vstm4	-1.14399	0.073874	8.63425	0.00329901	0.0111857
Idh2	-1.14503	6.45543	93.9565	3.22535e-22	1.81815e-20
Cd79b	-1.14534	3.73788	31.5417	1.95206e-08	2.14939e-07
Dbp	-1.14585	4.09163	18.2304	1.95734e-05	0.000123031
Gm20257	-1.14666	2.31163	15.4307	8.55876e-05	0.000459052
LOC118568309	-1.14706	2.59603	20.5459	5.82188e-06	4.11252e-05
Nova1	-1.14767	4.76379	46.3446	9.91819e-12	1.79118e-10
Gm43837	-1.1477	0.145483	6.89155	0.00866041	0.0252652
Mical2	-1.14849	1.96531	9.10046	0.00255545	0.00899655
Ivns1abp	-1.15036	10.773	25.2275	5.09517e-07	4.42551e-06
Mndal	-1.15044	2.90086	11.9886	0.000535266	0.00229848
Gm41361	-1.15093	0.422151	6.80386	0.00909611	0.0263515
9030025P20Rik	-1.15114	2.00478	14.9914	0.000108005	0.000564315
Cdk5r1	-1.15216	6.47691	110.51	7.57498e-26	5.98762e-24
Gm17025	-1.1523	0.992411	9.80395	0.00174137	0.00642805
Atp1b2	-1.15274	2.55944	9.90677	0.00164671	0.00613626
Itgb7	-1.15349	2.3444	11.5212	0.000688075	0.00286847
5830433I10Rik	-1.15711	0.345035	9.28891	0.00230545	0.00824866
I830077J02Rik	-1.15756	6.6881	81.9111	1.42349e-19	6.21636e-18
Slc23a1	-1.15817	0.817436	9.82844	0.00171834	0.00635776
Dmwd	-1.15818	1.64984	12.5663	0.000392765	0.00175528
Dact3	-1.15823	2.8682	18.4355	1.75753e-05	0.000111813
Gm51987	-1.15885	2.127	12.2718	0.000459857	0.00200771
Ms4a6b	-1.16043	5.4539	68.151	1.51441e-16	4.99474e-15
Mir24-2	-1.16046	1.27836	12.7367	0.000358554	0.00162238
Gm12258	-1.16051	3.90482	35.3208	2.79627e-09	3.53886e-08
LOC100861749	-1.16094	6.49453	28.1887	1.10044e-07	1.07529e-06
Gm6855	-1.16168	0.771585	8.96074	0.00275843	0.00962254
1700009J07Rik	-1.16305	1.12051	12.3508	0.000440796	0.00194169
Col9a3	-1.16315	2.95787	10.6879	0.00107837	0.0042442
Epn2	-1.16429	4.86893	86.8555	1.16749e-20	5.54321e-19
Bmp2	-1.16439	0.807665	8.11511	0.00438978	0.0142686
Bnc2	-1.1646	1.08602	9.20645	0.00241163	0.00856696
Mex3b	-1.167	4.55404	48.4863	3.32605e-12	6.35092e-11
Ddit4	-1.16978	4.10451	14.1138	0.000172075	0.000850398
Gm7598	-1.17141	0.244391	9.72103	0.00182171	0.00668517
Gm3739	-1.17302	5.83575	36.7772	1.32429e-09	1.75423e-08
Gm9054	-1.17596	-0.0189219	8.46414	0.00362217	0.0121158
Gm41610	-1.17723	1.31368	10.9398	0.0009412	0.00377146
Spon1	-1.17822	0.130176	9.70267	0.00184001	0.00674462
Cep68	-1.17837	6.9492	110.721	6.81102e-26	5.47552e-24
Folr1	-1.17837	1.76426	7.79209	0.00524755	0.0165731
Dusp27	-1.18085	4.08093	39.3972	3.45789e-10	5.0543e-09
Klf2	-1.18087	5.78534	7.9964	0.00468705	0.0150516
Gm35831	-1.18236	3.43953	23.1495	1.4988e-06	1.19004e-05
Efnb2	-1.18256	2.37729	17.2589	3.26169e-05	0.000195219
Gm52524	-1.18346	0.399237	9.85888	0.00169014	0.0062692
Unc5a	-1.18426	2.06171	16.6795	4.42556e-05	0.000256734
Sfmbt2	-1.18446	1.71174	13.6737	0.000217481	0.00104381
Gm32645	-1.18525	1.33378	9.48417	0.00207252	0.00750552
LOC115486538	-1.18529	5.28221	24.4613	7.58186e-07	6.39307e-06
Gm39859	-1.18926	1.53421	12.6448	0.000376619	0.00169329
Zfyve28	-1.1904	4.46208	42.2459	8.04882e-11	1.27958e-09
Slc25a37	-1.19046	7.56219	63.8348	1.353e-15	3.93094e-14
Ggnbp2os	-1.19122	1.96667	14.5851	0.000133971	0.000681856
Pip5k1b	-1.19222	0.29518	7.91659	0.00489835	0.0156131
Slc1a4	-1.19246	3.22017	23.6253	1.17041e-06	9.51189e-06
Gm3173	-1.19292	3.31045	19.6195	9.45005e-06	6.36103e-05
Gm16118	-1.19503	5.33889	52.3085	4.74321e-13	1.02304e-11
A530010L16Rik	-1.19522	0.385289	9.28418	0.00231142	0.00826281
Gm38952	-1.19544	0.740067	9.05171	0.00262449	0.00920751
Vangl1	-1.19629	2.80893	23.4059	1.31178e-06	1.05577e-05
Syt6	-1.19885	1.26848	8.80247	0.00300823	0.0103485
Gm51961	-1.19973	0.13595	7.9491	0.00481112	0.0153663
Gm36778	-1.20056	1.36114	12.5899	0.00038784	0.00173721
Prkab1	-1.20123	6.60291	111.363	4.92721e-26	4.02978e-24
Gm16867	-1.20191	0.430476	8.13803	0.00433463	0.0141185
Gm14537	-1.20211	0.138343	5.51499	0.0188541	0.0483887
Gm46626	-1.20323	1.31249	10.577	0.00114504	0.00446138
Stk39	-1.20391	2.22621	9.21446	0.00240112	0.00853389
5330438D12Rik	-1.20406	1.84877	12.0867	0.000507831	0.00219238
Vwf	-1.20489	3.43062	5.93968	0.0148037	0.0396701
P2ry10b	-1.20546	4.35305	51.2472	8.14363e-13	1.69947e-11
Pik3r3	-1.20595	2.27754	21.18	4.18109e-06	3.04312e-05
Plvap	-1.20718	1.2618	11.0504	0.00088667	0.00358545
Camp	-1.20745	1.55466	5.69714	0.0169926	0.044532
Avpr2	-1.20802	1.735	11.0326	0.000895222	0.00361384
5830444B04Rik	-1.21092	3.74137	20.4526	6.11253e-06	4.28999e-05
Tbc1d10c	-1.21149	0.983603	9.81837	0.00172777	0.00638616
Dlc1	-1.21167	3.45151	34.4043	4.47729e-09	5.45643e-08
Gm40782	-1.21312	0.27924	8.76968	0.00306279	0.0104953
LOC118567477	-1.21363	-0.0151576	8.58154	0.00339589	0.0114729
Myl2	-1.21569	2.92917	29.691	5.06694e-08	5.21904e-07
Tmem119	-1.21597	10.9016	26.3237	2.88729e-07	2.62546e-06
Gm41750	-1.21615	1.95745	10.5988	0.00113164	0.00441943
Asb2	-1.21903	6.17504	77.9427	1.06075e-18	4.27593e-17
Gm33023	-1.21916	0.985605	12.1839	0.000482029	0.00209274
Gm52024	-1.22193	-0.367974	7.82308	0.00515832	0.0163241
Pnp2	-1.22204	1.99976	14.9101	0.00011276	0.000586345
Ehd1	-1.22233	2.84557	8.77496	0.00305393	0.0104752
Gpr150	-1.22527	0.937391	11.2203	0.000809056	0.00330561
Spata45	-1.22701	0.112076	6.90295	0.00860538	0.0251254
Gm46687	-1.22839	1.40923	9.59797	0.00194793	0.00710159
Osbpl6	-1.22851	1.39614	9.27022	0.0023291	0.00831134
Cryba4	-1.22862	5.00208	100.415	1.23599e-23	8.09632e-22
Klhl23	-1.22882	4.30563	54.5513	1.5144e-13	3.46158e-12
Atp2b2	-1.2332	2.14225	12.9462	0.000320564	0.00147214
Gm31388	-1.23373	0.492096	7.6056	0.00581875	0.018073
Gm32317	-1.23604	2.26949	19.4133	1.05271e-05	7.01922e-05
Itga9	-1.23771	6.43129	85.1281	2.79645e-20	1.30155e-18
Gm51697	-1.23828	0.334562	9.85934	0.00168972	0.0062692
Slc14a1	-1.23857	1.73266	10.6565	0.00109684	0.00430969
Phyhd1	-1.23878	8.7496	64.0651	1.20377e-15	3.52632e-14
Ednrb	-1.2395	1.5494	10.7784	0.0010269	0.0040699
Cald1	-1.24127	1.81203	6.19616	0.0128028	0.0352083
Slc2a10	-1.24193	0.775782	11.0296	0.000896667	0.0036176
6330418K02Rik	-1.24242	3.53177	37.2834	1.02149e-09	1.38043e-08
Gm30411	-1.2425	-0.156185	7.84724	0.00508983	0.0161326
Ccr5	-1.24403	8.95147	56.3625	6.02677e-14	1.43799e-12
Tmem98	-1.24425	0.691507	7.51485	0.00611925	0.018863
Gm7997	-1.24633	1.00532	8.45654	0.00363733	0.012158
Gsta4	-1.24713	0.54783	7.16546	0.00743206	0.0222741
Lyve1	-1.24903	2.69578	19.3445	1.09131e-05	7.24248e-05
Lfng	-1.25111	6.07734	78.8914	6.5621e-19	2.69122e-17
Kcnip3	-1.25326	4.61829	42.3355	7.68854e-11	1.22644e-09
Kank1	-1.25394	0.396679	7.26259	0.00704057	0.0212584
Gm13547	-1.25444	-0.0989009	6.88924	0.00867162	0.025277
LOC115488283	-1.2571	1.67146	9.87885	0.0016719	0.00621373
Gm10614	-1.25756	0.338025	5.67784	0.0171805	0.0449033
Gjb6	-1.25778	0.0533229	7.2316	0.00716312	0.0215799
Thra	-1.2579	4.24754	49.9304	1.59294e-12	3.1879e-11
Ndrg4	-1.25805	0.914436	5.56767	0.0182951	0.0472799
Khdrbs3	-1.25956	4.81536	88.2356	5.81061e-21	2.86461e-19
Fgd2	-1.26045	9.17373	38.3851	5.8073e-10	8.15963e-09
Rgs18	-1.26079	0.42077	7.73768	0.00540804	0.0169852
Ly6g6e	-1.26102	0.384567	10.6242	0.00111619	0.00437528
Cyb561	-1.26208	1.31559	7.06088	0.00787852	0.0233745
Gm50587	-1.26264	1.66336	15.0441	0.000105027	0.000551402
Spata33	-1.26295	-0.0790563	10.3943	0.00126408	0.00486944
Gm39884	-1.26432	1.86396	18.1258	2.06778e-05	0.000129456
Map7d3	-1.26441	0.245341	10.4654	0.00121634	0.0047009
Ms4a4a	-1.2646	2.21536	14.8045	0.000119249	0.000615562
Gm10406	-1.26566	0.237761	6.63285	0.0100115	0.0286805
Nrm	-1.2674	5.26873	109.018	1.60841e-25	1.24357e-23
Zfp385c	-1.2683	1.59807	13.7873	0.00020472	0.000990283
Gm13840	-1.26896	1.26727	15.1081	0.000101529	0.000536153
Nat1	-1.26896	0.965054	13.8566	0.000197298	0.000959962
Foxred2	-1.27127	1.3891	7.95124	0.00480545	0.0153551
Tex101	-1.27215	0.457996	10.6126	0.0011232	0.00439496
Gm39173	-1.27481	2.50198	16.2815	5.45929e-05	0.000307866
Spint2	-1.27483	1.65771	8.43606	0.00367852	0.012284
LOC118567944	-1.27522	0.436831	11.0361	0.00089356	0.00360919
Pim1	-1.27641	3.93358	9.50974	0.00204384	0.00740925
Gm51701	-1.277	4.01072	51.0979	8.7873e-13	1.82572e-11
Gm39487	-1.279	1.43501	13.9727	0.00018548	0.000909655
Cav2	-1.2796	3.32359	26.022	3.37547e-07	3.02467e-06
LOC118567707	-1.27968	1.38147	11.6841	0.000630363	0.00265352
Pygm	-1.27978	1.88659	12.3047	0.000451821	0.0019792
Hbegf	-1.28007	1.32753	12.7089	0.000363917	0.00164297
Mpdz	-1.2806	0.0445933	5.90968	0.0150579	0.0402292
Arhgap4	-1.28131	8.0584	61.9512	3.52067e-15	9.78663e-14
LOC118568585	-1.28194	0.114697	6.60763	0.0101543	0.02903
Gm3704	-1.28232	1.66378	11.1517	0.000839559	0.00341348
Gm31003	-1.28324	7.54826	72.8335	1.41065e-17	5.13094e-16
Gm34836	-1.28472	5.30669	69.2803	8.54175e-17	2.90522e-15
Tet1	-1.28582	3.49636	33.6225	6.69137e-09	7.96268e-08
Gdf9	-1.28587	2.38737	21.3837	3.75954e-06	2.76044e-05
Cbr2	-1.28664	3.32565	26.6126	2.48614e-07	2.27974e-06
Heg1	-1.28883	2.63847	18.0341	2.16978e-05	0.000135005
Ildr1	-1.28949	2.69791	30.6837	3.03705e-08	3.24311e-07
Gm52503	-1.29028	2.55026	17.5702	2.76889e-05	0.000168358
F13a1	-1.29448	5.17205	33.3969	7.51446e-09	8.8161e-08
Gm5915	-1.2953	-0.259654	9.9039	0.00164929	0.00614424
Pi16	-1.29649	0.157211	8.49195	0.0035672	0.0119659
Epn3	-1.29935	0.702102	7.20125	0.0072853	0.0218816
Cebpd	-1.30009	5.74478	92.489	6.77015e-22	3.62844e-20
Pkd2l2	-1.30182	0.908673	12.1249	0.000497539	0.00215502
Lamb1	-1.30191	0.588085	10.3054	0.00132641	0.00507501
Palld	-1.30263	1.83488	10.7115	0.00106473	0.00419752
Gm16578	-1.30278	0.22231	11.1894	0.000822663	0.0033525
Gm35358	-1.3037	-0.143201	9.76779	0.00177595	0.00654545
Gnb4	-1.30424	1.13881	13.3825	0.000253979	0.00119875
Itga3	-1.30427	0.284939	8.16612	0.00426802	0.0139529
Slc40a1	-1.30645	7.21012	97.4212	5.60431e-23	3.37427e-21
Tsc22d3	-1.31394	5.40374	28.5399	9.17862e-08	9.07535e-07
Mymk	-1.31433	3.73574	54.2297	1.78371e-13	4.03158e-12
Magef1	-1.31488	3.44359	33.1969	8.32833e-09	9.72257e-08
LOC118568401	-1.3184	1.12795	14.4761	0.000141946	0.000718307
Cdhr4	-1.31925	1.50514	10.7101	0.00106551	0.00419941
Il6	-1.31982	2.3923	20.2245	6.88636e-06	4.77155e-05
Ralgps1	-1.32119	5.83685	66.5943	3.33557e-16	1.05111e-14
Ncs1	-1.32125	4.26875	48.618	3.11004e-12	5.97068e-11
Smpd3	-1.32155	0.468636	10.7343	0.0010517	0.00415423
Dnm1	-1.32168	0.306952	10.6253	0.00111553	0.00437462
Tlr8	-1.32251	2.93997	15.2946	9.19777e-05	0.000489245
Slco1c1	-1.32263	2.763	16.0131	6.29049e-05	0.000348626
Gm15707	-1.32341	0.370826	10.2678	0.00135376	0.00517125
Gm7694	-1.32527	4.59092	41.779	1.02195e-10	1.60662e-09
Epor	-1.32612	0.867444	13.9388	0.000188856	0.000923333
Nrxn2	-1.32618	1.01485	11.9216	0.000554861	0.00237326
Kdm6b	-1.32939	5.32506	99.8794	1.61968e-23	1.04643e-21
Gm33641	-1.33045	1.56597	13.4362	0.000246817	0.0011711
Arhgap27os3	-1.33144	3.58902	35.0041	3.29012e-09	4.10149e-08
Gm36266	-1.33637	2.38003	16.3026	5.39908e-05	0.000304713
Cbs	-1.33678	0.27031	11.3789	0.000742834	0.00307231
Lpar6	-1.33988	7.43955	131.449	1.97476e-30	2.14929e-28
Slco1a4	-1.34308	2.09771	5.83452	0.0157147	0.0416146
Zfp334	-1.34333	2.1199	20.2447	6.81425e-06	4.72751e-05
Dnah2	-1.34434	1.53077	16.1445	5.86901e-05	0.000328353
Pcp4l1	-1.34608	2.30985	13.3374	0.000260169	0.00122297
Gm36161	-1.34913	0.634176	5.91899	0.0149786	0.0400627
Gm572	-1.34944	1.71606	16.1152	5.96023e-05	0.000332401
Gm15246	-1.35056	1.60299	14.078	0.000175381	0.00086462
A930033H14Rik	-1.35226	2.44506	20.3438	6.4702e-06	4.52083e-05
Gm47754	-1.3525	1.93916	16.5158	4.82464e-05	0.000275925
Acsl6	-1.35336	1.35247	7.02137	0.00805426	0.0237763
Tppp	-1.35375	6.22041	77.6391	1.23694e-18	4.92761e-17
Adra2a	-1.35389	1.46396	13.5068	0.000237696	0.00113162
Acy1	-1.35409	4.06701	77.5158	1.31662e-18	5.2036e-17
Aifm3	-1.35536	0.888955	10.1325	0.00145678	0.00551215
Gm35828	-1.35561	4.05707	56.6517	5.20247e-14	1.254e-12
Gm38709	-1.35653	1.5211	14.9935	0.000107885	0.000564142
Cd300c	-1.35662	-0.274203	10.6421	0.00110541	0.00433855
Bcam	-1.35676	2.24422	7.96986	0.00475626	0.015222
St6galnac2	-1.35779	0.328559	8.68293	0.00321204	0.0109432
Irf4	-1.35938	3.36392	32.4088	1.24922e-08	1.41515e-07
Kcnd1	-1.36015	5.97475	71.7044	2.4997e-17	8.84205e-16
LOC118567393	-1.36036	1.41357	12.7933	0.000347855	0.00158054
Gm40841	-1.36081	6.90938	61.5105	4.40385e-15	1.2099e-13
LOC118567734	-1.36243	3.65145	33.3313	7.77213e-09	9.1033e-08
LOC108167736	-1.36293	4.61583	42.1057	8.64727e-11	1.36704e-09
Pdlim7	-1.36304	1.63447	5.53517	0.018638	0.0479831
Filip1l	-1.36375	5.6365	56.2058	6.5269e-14	1.54948e-12
Kcnj13	-1.36378	2.80567	8.56614	0.00342472	0.0115565
Gm3740	-1.36499	-0.231771	10.4552	0.00122307	0.00472431
Gm16193	-1.36583	-0.0981768	11.3824	0.000741427	0.00306805
Bcan	-1.36849	2.65421	9.46061	0.00209931	0.00758701
Gm32738	-1.36853	0.0818433	10.2452	0.00137039	0.0052221
Col23a1	-1.37042	-0.214744	11.6287	0.000649427	0.00272259
Gm34861	-1.3706	2.29796	16.7308	4.30749e-05	0.000250603
Ccdc8	-1.37096	1.10184	16.4807	4.91474e-05	0.000280398
Olfm1	-1.37118	2.17992	12.4728	0.000412916	0.00183031
Ifitm6	-1.37255	0.565877	11.1686	0.000831922	0.0033873
Gm39565	-1.3728	2.81279	19.6321	9.38773e-06	6.32509e-05
Gm22157	-1.3732	0.475139	10.6045	0.0011281	0.00440926
E230001N04Rik	-1.37464	-0.0121625	12.3398	0.000443397	0.00195075
Tstd1	-1.37471	2.65788	27.5586	1.52408e-07	1.45606e-06
BC051537	-1.37563	0.193438	12.5265	0.000401218	0.00178848
Prelp	-1.37565	1.48524	7.99934	0.00467944	0.0150339
Slc28a2	-1.3788	0.330836	12.8744	0.000333107	0.00152282
Erbb3	-1.38064	0.103683	9.81557	0.00173041	0.00639424
Chst7	-1.38236	5.69457	76.207	2.55429e-18	9.8476e-17
Cacnb2	-1.38236	3.26941	32.1797	1.40552e-08	1.57831e-07
Treml1	-1.38408	2.34059	16.4018	5.12363e-05	0.000290675
Gm9861	-1.38545	1.31844	16.3995	5.12987e-05	0.000290912
Unc13b	-1.38569	3.49933	40.3096	2.16747e-10	3.26597e-09
Lgals4	-1.38608	2.22971	22.5097	2.09081e-06	1.61126e-05
Acacb	-1.38754	0.697741	6.65913	0.00986491	0.0283236
Gimap5	-1.38777	1.04231	14.4681	0.000142551	0.000720858
Col18a1	-1.38965	1.13099	8.88245	0.00287924	0.00997268
Gnai1	-1.39017	0.149143	10.181	0.00141894	0.00538537
Fbxw10	-1.39059	2.39455	23.4801	1.26215e-06	1.01872e-05
Traf1	-1.39108	0.96678	6.38559	0.0115051	0.0322667
Gm1604a	-1.39166	0.159764	10.1647	0.00143152	0.00543165
Uchl1	-1.39184	0.232653	8.88893	0.00286904	0.00994175
LOC100861738	-1.39388	3.18526	27.4673	1.59771e-07	1.51922e-06
Slit1	-1.39395	0.186217	6.38282	0.011523	0.0322914
Gm41926	-1.39447	0.239387	12.3113	0.000450232	0.00197468
Ptprk	-1.39463	0.457242	8.22884	0.00412299	0.0135679
Gm36338	-1.39556	0.726552	8.20273	0.00418273	0.0137248
Cgref1	-1.39816	1.04726	15.6687	7.54625e-05	0.000409558
Myorg	-1.39875	0.138269	6.33993	0.011805	0.032925
Ggt5	-1.39924	5.72573	96.2717	1.00151e-22	5.929e-21
Cd93	-1.39953	3.70824	16.7613	4.23897e-05	0.000247023
Rtn1	-1.40039	6.35775	125.684	3.60471e-29	3.61724e-27
Chst8	-1.40092	4.43764	63.0589	2.00615e-15	5.73434e-14
Ltbp4	-1.4027	3.49386	5.90245	0.0151199	0.0403489
Bnip5	-1.40432	0.466972	10.6114	0.0011239	0.00439647
Gm51871	-1.40463	1.37697	13.411	0.000250147	0.00118412
Hhip	-1.40466	-0.0709781	8.7692	0.0030636	0.0104953
Qrich2	-1.4053	-0.0973971	9.62551	0.00191893	0.00700852
Dscc1	-1.40582	0.0854678	11.3572	0.000751563	0.00310297
Cd46	-1.40637	2.25051	27.1736	1.85984e-07	1.74734e-06
Gm34589	-1.40639	4.1519	58.7312	1.80751e-14	4.59841e-13
Gm38843	-1.40649	2.93509	34.9032	3.46508e-09	4.30821e-08
Cnga2	-1.40649	0.160917	12.2945	0.000454295	0.00198758
Gm15523	-1.40654	3.48055	49.7035	1.78827e-12	3.54871e-11
Tlr5	-1.40671	4.82338	89.7404	2.71556e-21	1.38709e-19
Serpinb8	-1.40731	1.29392	13.2477	0.000272911	0.00127735
Coro2b	-1.40782	0.769134	10.5145	0.00118442	0.00459512
S1pr5	-1.41115	0.571097	9.2707	0.00232849	0.00831125
Ptpn14	-1.41117	1.54887	19.1363	1.21707e-05	8.00946e-05
BC035044	-1.41538	5.53731	69.0058	9.81754e-17	3.30734e-15
Lst1	-1.41752	4.42194	87.1227	1.01991e-20	4.89177e-19
Armc3	-1.41765	1.59833	20.956	4.69957e-06	3.3891e-05
Gm33699	-1.4178	2.91922	35.7738	2.21603e-09	2.84525e-08
C1rl	-1.41784	3.01241	43.2283	4.87111e-11	8.03279e-10
Iqcd	-1.41814	0.139396	12.8835	0.000331499	0.00151645
Gm5953	-1.41883	0.384928	11.0977	0.000864344	0.00350318
Cpne2	-1.41936	2.16536	13.5602	0.000231034	0.0011025
Ms4a14	-1.42048	1.99403	14.6749	0.000127739	0.000655086
Vav3	-1.42124	0.901082	7.03032	0.00801409	0.0236824
Col11a2	-1.42382	2.73246	20.5955	5.67289e-06	4.01529e-05
Plekhg3	-1.42417	2.45551	17.3611	3.0908e-05	0.000185619
Slc22a4	-1.42449	0.741078	12.3746	0.000435223	0.00191837
Ccl24	-1.42475	1.69606	10.5768	0.00114517	0.00446138
Gm46916	-1.42517	1.57611	13.4235	0.000248491	0.00117746
Pdzd2	-1.42518	0.965975	12.3268	0.000446504	0.00196198
Rnase10	-1.42545	0.372898	9.76914	0.00177465	0.00654236
Angptl2	-1.42553	0.639769	10.9034	0.000959902	0.00383745
Dab2ip	-1.42645	2.52111	23.3085	1.37987e-06	1.10491e-05
Clec4a3	-1.42657	5.45607	101.132	8.6036e-24	5.68843e-22
Gm52866	-1.42871	1.34018	12.8688	0.000334097	0.00152636
C030005K06Rik	-1.42972	-0.180812	12.7845	0.000349501	0.00158616
Gm52528	-1.43001	0.562046	10.6265	0.0011148	0.00437295
Chp2	-1.43038	2.00041	16.6167	4.57453e-05	0.000263753
Gm41611	-1.43039	2.77764	20.7963	5.10824e-06	3.65587e-05
Cnn2	-1.43088	4.09643	55.6671	8.5842e-14	2.00425e-12
Eln	-1.43145	1.14698	6.35361	0.0117143	0.0327058
Gpr132	-1.43175	1.40805	7.67447	0.00560075	0.0174934
Krt8	-1.43319	0.223044	13.6751	0.000217317	0.00104356
Ly6m	-1.43344	1.09357	13.2396	0.000274099	0.00128164
Rasl2-9	-1.43424	1.56396	17.2439	3.28758e-05	0.000196519
Gm10790	-1.43468	6.77354	73.0815	1.24405e-17	4.54832e-16
Mir17hg	-1.43503	2.42685	26.55	2.5681e-07	2.35033e-06
Gm27008	-1.43736	2.80815	25.8666	3.65852e-07	3.24949e-06
Eps8	-1.43794	2.97605	31.531	1.96281e-08	2.15955e-07
Slc4a5	-1.43811	1.56747	6.92055	0.00852109	0.0249359
4930481B07Rik	-1.43839	-0.125904	12.4931	0.000408466	0.00181399
Fxyd1	-1.43929	0.634115	8.78091	0.00304399	0.0104512
Gm39308	-1.43962	0.418943	15.2194	9.57144e-05	0.000508166
Prkca	-1.44093	5.78049	92.9996	5.23051e-22	2.8464e-20
Zic1	-1.44152	0.122942	8.63864	0.00329107	0.0111667
Myo18b	-1.44207	6.27225	36.3251	1.67001e-09	2.18584e-08
Alb	-1.4423	0.0535938	7.82115	0.00516383	0.0163379
Ccdc125	-1.44374	1.70516	22.6024	1.99238e-06	1.54129e-05
Ada	-1.44442	0.940723	15.6664	7.55546e-05	0.000409587
Gm19689	-1.44755	0.324397	10.251	0.00136608	0.00520849
Ccdc88c	-1.44769	1.39618	13.2203	0.000276936	0.00129276
Sptb	-1.44937	0.880038	14.5156	0.000139004	0.000705189
Cldn2	-1.45045	1.22374	7.6686	0.00561901	0.0175302
Gm16124	-1.45066	1.11773	16.2014	5.69522e-05	0.000319768
Gm46116	-1.45225	4.71377	80.1127	3.53651e-19	1.48042e-17
Otx2	-1.4525	0.9005	8.91914	0.00282198	0.00980795
Cd209f	-1.45299	3.21034	32.9655	9.38082e-09	1.08174e-07
Lamtor3-ps	-1.45615	3.53361	24.2478	8.47031e-07	7.0957e-06
Gm52743	-1.4631	3.28288	21.8598	2.93316e-06	2.1912e-05
Cachd1	-1.46386	0.32571	9.85365	0.00169495	0.00628126
Snph	-1.46449	4.16849	47.1648	6.52621e-12	1.20705e-10
Bmp7	-1.46551	-0.075922	8.0228	0.00461922	0.014881
Fbln1	-1.46634	0.682573	14.5119	0.000139276	0.000706061
Gm31726	-1.46666	1.33901	17.1816	3.39704e-05	0.000202548
1600010M07Rik	-1.46726	1.30208	15.6289	7.70675e-05	0.000416671
Srl	-1.46798	3.31917	45.2399	1.74314e-11	3.03366e-10
Nlrc4	-1.46824	1.03754	16.6469	4.50237e-05	0.000260457
Snap25	-1.46985	1.24983	6.66892	0.00981089	0.0281971
2310047D07Rik	-1.47003	2.92769	32.0943	1.46866e-08	1.64529e-07
Gm38521	-1.47079	0.00584944	12.203	0.00047713	0.00207274
Dock5	-1.47093	1.30942	10.5334	0.00117234	0.00455698
Adgre4	-1.47128	1.73535	15.9705	6.43359e-05	0.000355166
Gpm6a	-1.47213	2.40126	10.4901	0.00120019	0.00464736
Cdc42ep1	-1.47421	0.755977	16.0823	6.06474e-05	0.000337641
Galnt16	-1.4746	2.66854	28.6084	8.85968e-08	8.79072e-07
Dnajb7	-1.47487	0.401019	14.2636	0.000158904	0.000794818
Gata2	-1.47521	0.704155	6.56753	0.0103856	0.0295844
LOC118568498	-1.47564	3.76762	32.4991	1.19249e-08	1.35522e-07
Slc38a3	-1.4771	2.04713	9.91326	0.00164092	0.00611788
Gm52681	-1.47969	1.15138	13.9042	0.000192368	0.000938556
Gm51544	-1.48179	0.993232	17.9132	2.31213e-05	0.000142484
Gm20045	-1.48392	2.34303	24.0174	9.54705e-07	7.9273e-06
4930430E12Rik	-1.48507	1.26787	5.77709	0.0162364	0.0428148
Gm30327	-1.48622	0.564116	12.9482	0.000320223	0.00147105
Lrba	-1.48658	7.20204	127.235	1.64997e-29	1.6917e-27
Pde1b	-1.49008	6.63675	72.3368	1.81436e-17	6.56558e-16
Gm5296	-1.49033	0.0452079	10.7022	0.00107006	0.00421501
Relt	-1.49103	3.5645	38.491	5.50059e-10	7.78278e-09
Klf7	-1.49118	5.68864	132.241	1.32524e-30	1.47644e-28
Sulf1	-1.49141	2.20171	7.15194	0.00748828	0.0224189
Stab1	-1.49218	9.785	43.4546	4.33913e-11	7.22287e-10
Frmpd4	-1.49349	1.04542	15.1012	0.000101899	0.000537573
Erp27	-1.49388	-0.389253	10.5681	0.00115058	0.00447921
Ccr2	-1.49615	4.46491	32.4608	1.21623e-08	1.38109e-07
Gucy1b1	-1.49699	0.184915	8.31814	0.00392511	0.0130031
Gm33100	-1.49758	0.928074	13.9471	0.000188026	0.000919594
Setbp1	-1.49795	2.75601	32.5769	1.14567e-08	1.30621e-07
Hr	-1.50549	0.489459	13.4456	0.000245581	0.00116641
Trim9	-1.5082	0.317916	13.5677	0.000230108	0.00109845
Zfp507	-1.51196	0.721449	14.7193	0.000124765	0.000641461
Gm13479	-1.51301	4.42356	61.2893	4.9274e-15	1.33559e-13
Ahr	-1.51316	1.08911	13.0558	0.000302348	0.00139756
Ccdc80	-1.51328	0.593945	16.0301	6.23422e-05	0.000346049
Dancr	-1.51376	1.03889	16.586	4.6493e-05	0.000267411
L3mbtl1	-1.51652	0.138296	10.7324	0.00105273	0.00415601
Myrip	-1.51854	0.843542	12.2437	0.00046682	0.00203232
Gm29941	-1.51947	2.28244	22.2063	2.44863e-06	1.86467e-05
Syn1	-1.52065	-0.0241215	13.9145	0.000191314	0.00093406
Plac8	-1.52101	1.69912	10.6757	0.00108553	0.0042712
Lypd6	-1.52145	3.09397	43.0059	5.45752e-11	8.93732e-10
Gm41425	-1.52494	-0.0952437	11.6135	0.000654739	0.00274161
Gm35853	-1.52542	1.114	18.0497	2.15212e-05	0.000134083
Trp53i11	-1.52603	4.87081	118.049	1.69126e-27	1.50501e-25
Gm14834	-1.528	-0.282504	10.6018	0.00112976	0.0044133
Ager	-1.52809	1.23026	16.0286	6.23928e-05	0.000346195
Ncaph	-1.52942	4.07387	75.8834	3.00915e-18	1.15383e-16
Mapk11	-1.52973	-0.101262	13.3627	0.000256685	0.0012093
Ryr1	-1.52973	-0.37091	8.9505	0.00277393	0.0096647
Slc38a11	-1.53047	0.685599	5.90448	0.0151024	0.0403177
1110006O24Rik	-1.53049	0.641132	16.1375	5.89068e-05	0.000329305
Gm30122	-1.53117	0.656105	14.4622	0.000142998	0.000722859
LOC118567790	-1.53122	1.21041	15.0452	0.000104967	0.000551293
Gm39673	-1.53459	5.76508	80.5376	2.85228e-19	1.20469e-17
Gm35866	-1.53481	1.68513	23.4365	1.29109e-06	1.0403e-05
Gm36449	-1.53541	-0.107168	12.8673	0.00033437	0.00152679
4930445E18Rik	-1.5382	1.00478	19.9022	8.15071e-06	5.56048e-05
LOC118568037	-1.53852	2.76883	29.9562	4.41922e-08	4.61118e-07
Adrb2	-1.53957	6.91178	89.5433	3e-21	1.52687e-19
Ppp1r1b	-1.54052	2.08528	9.70164	0.00184104	0.00674666
Omg	-1.54505	0.00522922	10.624	0.00111632	0.00437528
Ntn4	-1.54604	0.453238	6.94452	0.00840765	0.0246345
Gm14154	-1.54635	0.417241	14.5232	0.000138447	0.000702864
Rnd3	-1.54869	0.446325	12.3254	0.000446825	0.00196278
Prlr	-1.54889	2.90385	7.67264	0.00560643	0.0175072
Frem1	-1.5513	0.446282	7.27062	0.00700918	0.0211817
Slc43a1	-1.55202	1.1958	14.2169	0.0001629	0.000811862
Fam83g	-1.5538	1.77467	22.8818	1.72274e-06	1.34993e-05
Cyp2d22	-1.55531	1.24047	22.5017	2.09953e-06	1.6171e-05
Cgnl1	-1.559	2.57759	15.845	6.87483e-05	0.000376585
Pdlim4	-1.56025	5.26369	119.744	7.19871e-28	6.65716e-26
S100a8	-1.56039	3.68867	8.87461	0.00289164	0.0100058
Rasgrp2	-1.56157	1.7784	16.8638	4.01606e-05	0.000235977
Mcemp1	-1.56242	0.906189	6.1415	0.0132046	0.0361096
Alpl	-1.56298	1.12027	7.09779	0.0077179	0.0229799
Gm52823	-1.56305	-0.132301	12.6806	0.000369477	0.00166541
Sox13	-1.56352	1.76295	17.7935	2.4622e-05	0.000150943
Sirpb1a	-1.56422	-0.13503	5.97013	0.0145502	0.039087
Gm39715	-1.56459	-0.310847	12.5303	0.000400397	0.00178622
Lcat	-1.56478	-0.0924485	14.0375	0.0001792	0.000880994
Pdgfrb	-1.56662	1.58348	13.6665	0.000218318	0.00104676
Fam72a	-1.56834	4.5557	95.86	1.23304e-22	7.20923e-21
9930012K11Rik	-1.56986	1.64307	26.0354	3.35212e-07	3.00755e-06
Gm32992	-1.57067	0.810323	14.2468	0.000160337	0.000801061
Col4a4	-1.57383	0.159998	7.91975	0.0048898	0.0155894
Gm41308	-1.57562	1.43116	21.6615	3.25247e-06	2.40309e-05
Ahnak	-1.57692	4.81821	16.0753	6.08743e-05	0.000338699
Fads6	-1.57715	3.68163	68.3229	1.38802e-16	4.58856e-15
Cfap65	-1.57743	0.0477013	6.01998	0.0141448	0.0382083
LOC115487644	-1.57757	0.0380431	14.4288	0.000145561	0.000733977
Abca4	-1.57851	1.59578	8.10913	0.00440429	0.014305
Pglyrp1	-1.57992	0.866401	11.3091	0.000771267	0.00316952
LOC102631992	-1.5826	5.14345	68.9276	1.02144e-16	3.41664e-15
Gm32098	-1.58397	4.37473	80.2539	3.2927e-19	1.38244e-17
Nhsl2	-1.58412	4.87659	98.7517	2.8623e-23	1.76081e-21
Gm31940	-1.5846	0.148985	11.317	0.000768005	0.00315887
Gm13293	-1.58572	2.847	28.7482	8.24279e-08	8.21319e-07
Tgfbr3	-1.58899	0.865324	14.893	0.000113784	0.000591235
Gm8339	-1.58934	-0.400932	7.88774	0.00497711	0.0158356
Pcolce	-1.59188	2.52285	30.2973	3.70637e-08	3.9077e-07
A2m	-1.59189	1.60334	6.09841	0.0135303	0.0368411
Patl2	-1.59205	-0.10813	12.4781	0.000411743	0.00182683
Gm20337	-1.59462	-0.157172	12.3124	0.000449969	0.00197415
Csrp2	-1.59568	-0.116864	11.2514	0.000795621	0.00326202
Gm9157	-1.59593	0.505403	19.7401	8.8718e-06	6.01183e-05
Slc6a1	-1.59722	1.75382	9.22973	0.00238117	0.00847248
Slc13a3	-1.59763	4.13645	81.5625	1.69805e-19	7.36986e-18
Gm35887	-1.59932	0.468774	16.5484	4.74252e-05	0.000271777
LOC118568291	-1.60336	0.155368	13.9659	0.000186155	0.000912335
Pf4	-1.60658	3.57376	22.1045	2.58209e-06	1.96208e-05
Kcnc3	-1.60666	0.383639	16.5734	4.68018e-05	0.00026875
Gm52013	-1.60836	2.20498	22.0212	2.6966e-06	2.03815e-05
Trpm3	-1.60852	4.00249	9.30633	0.00228363	0.00818625
Iho1	-1.61024	1.88437	18.9682	1.32913e-05	8.69834e-05
Gm31386	-1.61065	-0.378801	13.871	0.000195792	0.00095329
1700011L22Rik	-1.6111	-0.176366	10.3013	0.0013294	0.00508506
Gm35243	-1.61223	2.15305	26.7872	2.27136e-07	2.09774e-06
Actn1	-1.61357	5.00712	59.9325	9.81691e-15	2.59141e-13
Enpp5	-1.62045	2.99016	40.1554	2.34536e-10	3.50788e-09
Gm21188	-1.6215	-0.175991	6.6369	0.00998876	0.0286385
Gimap1	-1.62476	3.87892	96.0371	1.12749e-22	6.61945e-21
Prr22	-1.63132	0.0346758	12.113	0.00050072	0.00216693
Kcnk12	-1.63643	4.60538	85.2463	2.63427e-20	1.23011e-18
Aqp1	-1.63647	1.38152	8.96983	0.00274475	0.00958899
Fbn1	-1.63888	-0.189428	10.1024	0.00148074	0.00558844
Strip2	-1.64084	1.86509	7.37658	0.00660786	0.020141
Sdc2	-1.64283	0.74376	13.8328	0.000199822	0.000969242
Klhdc7a	-1.64395	0.541541	11.3411	0.000758104	0.00312632
Hes1	-1.64706	3.20784	45.2602	1.72517e-11	3.00608e-10
Gm41569	-1.64883	0.787045	15.7169	7.35645e-05	0.000400372
Lbp	-1.64937	1.26485	10.1178	0.00146844	0.00554645
Nfe2	-1.65615	-0.0904623	10.9448	0.000938687	0.00376246
Sema3b	-1.65678	0.792158	12.7925	0.000348012	0.00158075
Gm3317	-1.66029	1.26973	12.4487	0.000418277	0.00185117
Tgm1	-1.66202	1.22647	16.8152	4.12012e-05	0.000240692
Pla2g7	-1.66497	3.87434	12.775	0.000351277	0.00159353
Cd209b	-1.66511	1.61034	15.9273	6.58212e-05	0.000362375
Efcab6	-1.66643	0.957708	21.2455	4.04059e-06	2.94693e-05
Cd38	-1.66855	2.38226	16.3461	5.27645e-05	0.000298387
Shoc1	-1.67464	0.272372	15.4464	8.48799e-05	0.000455601
Lrrc70	-1.67484	2.22831	30.8253	2.82338e-08	3.02866e-07
Abcg3	-1.67677	3.58211	61.3674	4.73596e-15	1.28616e-13
Upk1b	-1.67942	6.95055	76.1797	2.58994e-18	9.9579e-17
Cd300ld4	-1.68177	3.46609	63.9985	1.24516e-15	3.64003e-14
Il1bos	-1.6822	0.809809	13.9582	0.000186925	0.000915157
Fam110a	-1.68285	5.24879	118.691	1.2241e-27	1.11024e-25
Sntb1	-1.68457	-0.139624	10.4417	0.00123199	0.00475619
Fgfr3	-1.68567	1.58741	14.1602	0.000167881	0.000833746
Cav1	-1.68628	1.6135	11.6837	0.000630513	0.00265352
Stard13	-1.68916	0.834261	14.417	0.000146475	0.000738325
Ovgp1	-1.69086	1.02926	19.2421	1.15148e-05	7.59904e-05
Epha2	-1.69136	5.44282	91.9523	8.87901e-22	4.74072e-20
Gadl1	-1.69148	1.59848	14.6022	0.000132761	0.000677645
Gm33858	-1.6929	5.65162	38.1154	6.66817e-10	9.28622e-09
LOC118568655	-1.69514	4.21831	63.9019	1.30771e-15	3.80716e-14
Vldlr	-1.69549	0.478539	8.90587	0.00284256	0.00986736
Clec12a	-1.69558	2.83611	22.6825	1.91096e-06	1.48155e-05
Gm32006	-1.6975	3.48098	40.2353	2.25143e-10	3.38528e-09
Lrrk2	-1.7025	1.37319	13.4632	0.000243289	0.00115591
Tmem53	-1.70544	-0.0309044	15.1776	9.78595e-05	0.000518194
Mrvi1	-1.70576	0.583043	13.3751	0.00025499	0.00120262
Angptl7	-1.71363	3.54696	51.0538	8.98671e-13	1.86441e-11
Sgsh	-1.71407	4.42409	125.078	4.89258e-29	4.74145e-27
Ovol1	-1.71431	1.49977	27.3997	1.65456e-07	1.568e-06
Cfp	-1.71712	3.27991	18.2038	1.9848e-05	0.000124592
Cmah	-1.71805	1.81456	19.8658	8.30713e-06	5.65628e-05
LOC118568587	-1.71884	1.35635	20.7226	5.30858e-06	3.79541e-05
Qprt	-1.7233	2.09859	33.0745	8.86927e-09	1.02813e-07
Npr3	-1.72582	0.47243	11.6306	0.000648758	0.00272139
Akap3	-1.72583	0.833979	20.9872	4.62366e-06	3.33947e-05
Dsp	-1.72729	0.800141	9.29476	0.00229811	0.00823187
Kcng2	-1.72856	0.263767	17.0734	3.59633e-05	0.0002138
Gria2	-1.73218	0.298177	12.8975	0.000329029	0.00150564
Lin7b	-1.73671	0.451025	20.2717	6.71875e-06	4.67603e-05
Grap	-1.73849	5.62384	120.861	4.09878e-28	3.81537e-26
Pcnx2	-1.74098	3.65793	68.076	1.57313e-16	5.15235e-15
Flt3	-1.74307	1.90627	23.8017	1.06789e-06	8.75413e-06
Nsg2	-1.74329	1.64498	12.8788	0.000332324	0.00151973
Col8a2	-1.74474	1.30361	14.2314	0.000161655	0.000806507
Gm34346	-1.74838	0.491798	17.7044	2.58026e-05	0.000157635
Mmp11	-1.74859	1.76018	31.0209	2.5526e-08	2.757e-07
D930028M14Rik	-1.74997	0.698805	16.715	4.34356e-05	0.000252494
Gm36462	-1.75105	0.865519	18.3369	1.85086e-05	0.000117119
Gm6610	-1.75466	1.22348	20.0513	7.53929e-06	5.18587e-05
Mtss1	-1.75833	5.83495	130.602	3.02572e-30	3.19484e-28
Atp2b3	-1.76383	3.20839	8.52084	0.00351103	0.0118083
Htra1	-1.77209	1.71907	18.092	2.10478e-05	0.00013154
Cd209g	-1.77523	1.5656	24.8692	6.13552e-07	5.24541e-06
Clec4a1	-1.77549	2.80538	49.1949	2.31747e-12	4.53525e-11
Ggta1	-1.77579	6.61448	167.152	3.09837e-38	5.21891e-36
Tctn2	-1.7782	0.392354	18.2373	1.95022e-05	0.000122638
F5	-1.77938	2.86618	15.0633	0.000103964	0.000547037
Podxl2	-1.78115	1.0132	21.1207	4.31253e-06	3.13234e-05
Kcp	-1.78399	2.70598	45.4834	1.53939e-11	2.70569e-10
Gm19688	-1.78464	-0.318229	13.6177	0.000224069	0.00107215
Camk2n1	-1.78597	6.18598	152.47	5.00096e-35	7.14733e-33
Sec16b	-1.79005	2.90645	44.1959	2.97106e-11	5.05876e-10
Ccn1	-1.79526	0.533732	12.8717	0.000333596	0.00152456
Car12	-1.79626	2.27689	10.347	0.00129686	0.00498079
Gm13868	-1.79751	-0.0469458	15.9763	6.41399e-05	0.000354367
Gm13067	-1.80003	1.43745	23.909	1.00996e-06	8.31778e-06
Gja1	-1.80092	1.47049	13.9287	0.000189875	0.000927672
Gm41598	-1.8036	3.47284	59.0262	1.55584e-14	3.98796e-13
Trim16	-1.80495	1.03745	29.3579	6.01694e-08	6.12033e-07
Tlcd5	-1.80855	0.0372085	15.8608	6.81747e-05	0.000374168
Myb	-1.81184	0.0965143	19.7347	8.89724e-06	6.0233e-05
S100a9	-1.81515	4.43633	16.1145	5.96249e-05	0.000332401
Vat1l	-1.81548	2.2468	9.67064	0.00187236	0.00684904
Gm15232	-1.81633	1.51087	25.9063	3.58402e-07	3.19134e-06
Gm30789	-1.81897	5.70119	76.3274	2.40329e-18	9.3418e-17
Gm39624	-1.81905	1.48465	22.3012	2.33058e-06	1.77957e-05
Gm32605	-1.82136	3.87733	93.89	3.33559e-22	1.86543e-20
Unc5cl	-1.82289	1.05569	16.5544	4.72746e-05	0.000271025
Gm36365	-1.82528	6.66767	173.106	1.55201e-39	2.85186e-37
Gm34655	-1.82799	0.168401	18.2884	1.89857e-05	0.000119657
Adgre5	-1.828	3.10562	14.0404	0.000178922	0.000880029
LOC118568063	-1.83195	1.08485	17.5087	2.85994e-05	0.000173596
Drc7	-1.83276	1.14983	16.1808	5.75751e-05	0.000322626
Sox17	-1.83346	1.01147	8.74989	0.0030962	0.0105894
Gm40096	-1.83976	2.29726	40.0157	2.51928e-10	3.76402e-09
Tmem52	-1.84092	2.85645	38.3669	5.86169e-10	8.21972e-09
Crybb1	-1.84218	7.18854	256.702	8.9833e-58	3.53069e-55
Gm42364	-1.84272	-0.201556	16.9527	3.83224e-05	0.000226967
Mboat1	-1.84326	2.51537	44.2372	2.90894e-11	4.96484e-10
Clec10a	-1.84702	3.618	44.1958	2.97112e-11	5.05876e-10
8030442B05Rik	-1.84713	2.51826	36.4441	1.57109e-09	2.06209e-08
LOC102636563	-1.84717	-0.332535	14.5766	0.000134578	0.000684698
Gm36003	-1.84815	1.98111	30.5464	3.2598e-08	3.46789e-07
LOC115490435	-1.85424	0.88716	20.3949	6.2997e-06	4.40823e-05
Gimap6	-1.85881	4.33207	82.5434	1.03375e-19	4.55656e-18
Cacnb3	-1.85912	0.706495	9.00839	0.00268744	0.00940736
Slc2a12	-1.85957	1.31216	16.9258	3.88687e-05	0.00022953
Hdgfl3	-1.86065	3.90638	94.433	2.53531e-22	1.44065e-20
Dok3	-1.8612	5.75036	104.058	1.96455e-24	1.38291e-22
Klra2	-1.86558	1.81049	16.3183	5.3544e-05	0.000302433
Rasgrp4	-1.86715	4.76347	89.4796	3.09817e-21	1.57118e-19
Ltf	-1.87099	3.42268	8.47408	0.00360242	0.0120584
Sh3d19	-1.87357	1.41871	18.8763	1.39473e-05	9.08565e-05
Mgst1	-1.87359	1.02035	7.97184	0.00475105	0.0152088
Hba-a1	-1.87785	3.65321	13.9988	0.000182931	0.000897777
Gm42372	-1.87901	-0.243797	16.7205	4.33107e-05	0.000251871
Kcne2	-1.88066	1.34693	10.572	0.00114815	0.00447157
Krt10	-1.88228	0.936201	11.0309	0.000896077	0.00361625
Kl	-1.8865	3.97093	14.325	0.000153808	0.000771164
Gm35999	-1.88767	2.00024	29.1249	6.78599e-08	6.84843e-07
E130215H24Rik	-1.8893	0.222606	18.7787	1.46796e-05	9.53197e-05
Tgm2	-1.89141	6.77903	151.095	9.98927e-35	1.41338e-32
Pcdh7	-1.89779	0.0225501	16.8519	4.04122e-05	0.000236963
Gm15912	-1.89786	1.29737	26.4499	2.70463e-07	2.47049e-06
Trp53cor1	-1.89829	1.94128	29.5138	5.55195e-08	5.68412e-07
Igfbp2	-1.90422	2.81139	16.6704	4.44686e-05	0.000257758
Klrd1	-1.9057	1.2521	29.2309	6.42449e-08	6.51613e-07
Plbd1	-1.91791	3.26344	19.1072	1.23576e-05	8.11737e-05
Clic6	-1.91923	3.11269	14.5258	0.000138254	0.00070239
Gm39439	-1.92877	0.620389	20.6516	5.50917e-06	3.91312e-05
Tcstv1	-1.93139	0.565948	17.6542	2.64926e-05	0.000161534
Gm41556	-1.93706	0.495228	18.0776	2.12077e-05	0.00013248
Clec4a2	-1.94223	5.1716	174.558	7.4758e-40	1.4691e-37
LOC102639987	-1.94281	0.365597	20.2302	6.86609e-06	4.75984e-05
Gprc5c	-1.94358	0.520866	18.5972	1.61454e-05	0.000103555
Crhr2	-1.94387	-0.30283	16.8537	4.03746e-05	0.000236869
Sema6d	-1.94405	4.23688	50.2509	1.35292e-12	2.73007e-11
Pecam1	-1.94658	4.89628	139.003	4.39852e-32	5.18622e-30
Enpp2	-1.94903	7.26856	17.8411	2.40145e-05	0.000147474
Tll2	-1.95175	-0.206606	19.4991	1.00648e-05	6.72997e-05
LOC118568068	-1.9525	1.56792	30.2498	3.79837e-08	3.9928e-07
Il7r	-1.95599	4.20076	110.997	5.92593e-26	4.81873e-24
Gm52877	-1.95893	1.50077	26.937	2.10199e-07	1.95536e-06
Gm39285	-1.9667	2.66183	42.887	5.79943e-11	9.43174e-10
Il2ra	-1.97144	-0.203046	10.9798	0.000921088	0.00370267
Afm	-1.9726	1.53158	18.8243	1.43329e-05	9.33252e-05
Gm12958	-1.97299	0.082487	19.2062	1.17331e-05	7.73806e-05
Sfrp1	-1.97501	0.0184114	10.6618	0.00109372	0.00430057
Gm21358	-1.97994	0.761796	28.4314	9.70784e-08	9.53862e-07
Gm34849	-1.98409	0.601316	14.6971	0.000126238	0.000648192
Col6a3	-1.98845	6.49962	87.3908	8.90618e-21	4.31553e-19
Gm36417	-1.99122	-0.0583474	17.4894	2.88907e-05	0.000174989
Col8a1	-1.9965	1.59217	15.638	7.66968e-05	0.000415301
Scube3	-2.00117	0.483086	21.2083	4.11978e-06	3.00004e-05
Tspan18	-2.00242	4.94148	85.8461	1.94498e-20	9.14268e-19
Slc7a10	-2.01101	1.43206	10.2521	0.00136526	0.00520677
Siglece	-2.02248	5.79446	208.36	3.13061e-47	8.85901e-45
Pnpla3	-2.02452	0.685963	28.215	1.08558e-07	1.06223e-06
Cecr2	-2.02527	0.330403	27.6836	1.42872e-07	1.3705e-06
Gm13778	-2.03541	2.53588	50.932	9.56203e-13	1.97508e-11
Mmp15	-2.03734	1.9887	36.8484	1.27683e-09	1.69632e-08
Ltb	-2.0406	2.84505	52.4743	4.35906e-13	9.45956e-12
Mmp28	-2.04244	2.95796	35.1402	3.06807e-09	3.83821e-08
Mmp9	-2.04279	2.91321	18.3983	1.79218e-05	0.000113762
Gimap9	-2.04439	2.80963	66.7623	3.06301e-16	9.69541e-15
S100a10	-2.05903	2.32847	19.5644	9.7265e-06	6.52848e-05
Slc39a12	-2.06838	3.722	75.5151	3.62631e-18	1.38298e-16
Dnah6	-2.07612	0.174011	8.70549	0.00317253	0.0108242
Plxna1	-2.07947	4.09302	59.6763	1.11813e-14	2.92971e-13
Gm11523	-2.08039	4.08598	93.6396	3.78541e-22	2.10039e-20
Sgms2	-2.08541	1.3326	17.4011	3.02657e-05	0.000181916
Fgf11	-2.08584	4.29791	127.408	1.51256e-29	1.57362e-27
Klk9	-2.09818	1.11181	25.719	3.94913e-07	3.49445e-06
Gm6749	-2.09873	1.3375	34.7777	3.69587e-09	4.56707e-08
Gm29927	-2.09882	0.978256	20.9923	4.61133e-06	3.33227e-05
Slc4a10	-2.10751	2.51979	15.0657	0.000103831	0.000546542
Atp8b4	-2.11628	1.29485	13.2481	0.000272858	0.00127735
Qrfp	-2.12181	-0.401109	16.8351	4.07726e-05	0.000238681
Gpr37l1	-2.12335	1.61806	24.2344	8.52967e-07	7.13276e-06
Gm30013	-2.12713	0.00151669	20.7215	5.31168e-06	3.79571e-05
1700020L24Rik	-2.13051	0.998567	31.2934	2.2183e-08	2.41437e-07
Gm11827	-2.13142	-0.00732316	23.157	1.49302e-06	1.18612e-05
Htr2c	-2.13308	2.00793	10.2493	0.00136738	0.00521205
Hbb-bs	-2.14088	3.89731	12.5867	0.000388499	0.00173952
F630028O10Rik	-2.14399	0.918442	22.5399	2.05823e-06	1.58789e-05
Gm40860	-2.14627	2.81151	64.7986	8.29587e-16	2.49741e-14
Ccdc162	-2.1463	3.29632	55.0816	1.1563e-13	2.67766e-12
Tmem204	-2.14701	4.52315	105.358	1.01954e-24	7.55261e-23
Kcnk1	-2.14846	0.782244	12.9346	0.000322558	0.00147985
Gm3764	-2.15579	1.89963	17.483	2.89886e-05	0.000175432
Atp1b1	-2.16273	2.93677	33.464	7.25935e-09	8.54829e-08
Gm35242	-2.16342	0.152423	25.8928	3.60905e-07	3.20958e-06
Slc26a11	-2.1638	3.38441	47.1676	6.51676e-12	1.20688e-10
Skint3	-2.16584	1.00154	28.4358	9.68575e-08	9.52354e-07
Anpep	-2.18281	2.83468	7.16502	0.0074339	0.0222749
Ecrg4	-2.18553	1.94388	14.7568	0.000122305	0.000629956
P2rx1	-2.18573	3.48582	78.6037	7.59066e-19	3.08622e-17
Pilrb2	-2.19051	0.50772	17.938	2.28214e-05	0.000140697
Gp9	-2.19488	3.86613	117.548	2.17737e-27	1.92548e-25
Hpca	-2.1951	-0.191411	18.526	1.67606e-05	0.00010716
Adtrp	-2.19994	1.24234	29.7162	5.00161e-08	5.158e-07
Gm31482	-2.20036	1.06802	37.5244	9.02759e-10	1.23055e-08
Gm39348	-2.20596	1.64117	30.8473	2.79157e-08	3.00365e-07
Hbb-bt	-2.20619	0.912603	12.5091	0.000404972	0.00180301
Ecscr	-2.20974	6.31896	162.941	2.57652e-37	4.14263e-35
Ttr	-2.21432	8.2772	22.5295	2.06942e-06	1.59565e-05
Zfp57	-2.21566	1.1146	30.1243	4.05221e-08	4.25016e-07
Ltb4r1	-2.21638	0.4808	18.703	1.52743e-05	9.85035e-05
Hif3a	-2.21654	-0.371328	21.009	4.57129e-06	3.30672e-05
Slc36a2	-2.22157	2.10269	29.6219	5.25087e-08	5.38757e-07
Cd209a	-2.2239	3.63976	54.2938	1.72648e-13	3.90847e-12
Dpp4	-2.22391	0.67909	17.9783	2.23433e-05	0.000138261
Gm38907	-2.22819	-0.0929558	12.5377	0.000398826	0.00178012
Slc5a5	-2.2351	1.06214	30.638	3.10952e-08	3.31299e-07
Gm30723	-2.24624	4.37687	65.4002	6.11342e-16	1.8562e-14
Slco4a1	-2.24878	5.55849	77.2357	1.51728e-18	5.97995e-17
Treml4	-2.26308	0.45556	20.1028	7.33874e-06	5.0553e-05
Gm42043	-2.27129	1.94629	44.7762	2.20891e-11	3.8161e-10
Cass4	-2.27628	3.99943	142.104	9.22808e-33	1.16579e-30
Napsa	-2.28106	1.25384	19.8323	8.45434e-06	5.75099e-05
S100a6	-2.28857	2.46491	15.1169	0.000101053	0.000533908
Slc12a5	-2.29001	1.47607	23.0326	1.59281e-06	1.25903e-05
Kmo	-2.29474	0.179617	20.4566	6.09985e-06	4.28322e-05
Fam181b	-2.31398	0.555828	27.128	1.9042e-07	1.78664e-06
Slc13a4	-2.31852	1.51965	18.515	1.68569e-05	0.000107727
Nhs	-2.32447	1.29429	22.0184	2.7005e-06	2.04001e-05
Ccr1	-2.32559	3.8861	24.373	7.93737e-07	6.66108e-06
Adamtsl2	-2.32895	3.17014	66.2463	3.97952e-16	1.24296e-14
Hlf	-2.32981	4.02587	56.158	6.68751e-14	1.5823e-12
Ctnnd2	-2.34534	3.19989	63.763	1.40326e-15	4.06027e-14
Siglecg	-2.34573	2.37036	39.9466	2.60997e-10	3.87904e-09
Cd209c	-2.34769	0.857744	34.3394	4.62926e-09	5.63193e-08
Mgl2	-2.3511	3.87608	66.2637	3.94452e-16	1.23476e-14
Sema4b	-2.35857	5.02129	252.913	6.01822e-57	2.3014e-54
Mmp8	-2.35936	1.50318	9.46336	0.00209617	0.00757953
Serpinf1	-2.35964	4.79448	186.62	1.73874e-42	3.96797e-40
Gm36884	-2.36179	2.46572	71.609	2.62351e-17	9.23383e-16
Adcy8	-2.36531	3.63341	54.3206	1.70305e-13	3.86162e-12
Phf24	-2.36629	1.89245	26.9012	2.14128e-07	1.98799e-06
Miat	-2.36928	0.153308	15.9853	6.38364e-05	0.000353097
Sell	-2.37038	0.969568	12.9038	0.000327919	0.00150153
LOC118568485	-2.37532	0.526352	27.5306	1.54629e-07	1.47528e-06
Sod3	-2.37575	0.262209	22.0975	2.59151e-06	1.96713e-05
Mapk12	-2.38312	1.88273	48.5439	3.22982e-12	6.18386e-11
Gm33048	-2.3887	-0.30481	25.2774	4.96481e-07	4.32024e-06
Gpr165	-2.39056	4.49668	108.704	1.88442e-25	1.44122e-23
Gm51448	-2.39759	0.505398	24.3291	8.1201e-07	6.80636e-06
Hepacam2	-2.40357	0.0890424	19.5866	9.61395e-06	6.456e-05
Bank1	-2.40586	4.92381	131.33	2.09718e-30	2.24796e-28
Slc5a10	-2.40767	1.9143	46.852	7.65569e-12	1.40676e-10
Sostdc1	-2.41287	1.53536	18.579	1.63005e-05	0.000104502
Kng2	-2.4182	0.678411	32.3065	1.3167e-08	1.48683e-07
Unc79	-2.45217	1.17405	40.8934	1.60765e-10	2.4538e-09
Gm41071	-2.45273	3.69269	80.6351	2.71493e-19	1.1501e-17
Mycl	-2.46515	3.38874	131.91	1.56566e-30	1.71725e-28
Hp	-2.47144	2.20858	15.9606	6.4675e-05	0.000356759
Gm28874	-2.47239	0.180972	22.9674	1.6477e-06	1.29735e-05
Steap2	-2.4788	1.20948	22.0851	2.60823e-06	1.97664e-05
Gm7033	-2.48286	2.11243	49.8755	1.63818e-12	3.27381e-11
Gm35247	-2.48505	2.04057	48.4646	3.36308e-12	6.41298e-11
Gm40863	-2.49056	1.4476	43.6794	3.86821e-11	6.50016e-10
Nrarp	-2.52551	3.406	140.95	1.64987e-32	1.99522e-30
Ear2	-2.52647	0.788878	24.6869	6.74419e-07	5.72427e-06
Ifitm1	-2.5412	1.04258	8.00991	0.0046522	0.0149668
Cd36	-2.54272	4.42242	14.9487	0.000110477	0.000575739
Duoxa1	-2.54384	1.56182	40.205	2.28665e-10	3.43094e-09
Krt80	-2.54663	0.964873	22.4017	2.21183e-06	1.69438e-05
Dpep2	-2.55133	0.995547	14.6557	0.000129042	0.000661526
Rara	-2.55257	1.24321	23.2714	1.40677e-06	1.12343e-05
Gm52697	-2.57085	2.41763	52.4485	4.41676e-13	9.57011e-12
Cd24a	-2.58164	1.96201	14.9915	0.000107996	0.000564315
Gda	-2.58217	2.36054	14.5738	0.000134776	0.000685458
5730435O14Rik	-2.59332	0.141885	27.8474	1.31271e-07	1.26609e-06
Gm3227	-2.59835	-0.554328	26.0741	3.2856e-07	2.94974e-06
Gm38987	-2.62959	-0.213834	22.3966	2.2177e-06	1.69796e-05
Acod1	-2.6362	2.29154	6.47426	0.0109448	0.0309221
Gm32249	-2.65001	4.58491	170.675	5.2697e-39	9.20506e-37
Hsf2bp	-2.65163	3.18466	44.5534	2.47512e-11	4.25005e-10
Gm9618	-2.66598	-0.382515	23.9754	9.75757e-07	8.08645e-06
LOC118567482	-2.67907	-0.0126597	34.6308	3.98555e-09	4.90361e-08
Gm33434	-2.69373	0.230597	32.8767	9.81942e-09	1.12864e-07
Emp1	-2.69825	2.19113	7.84253	0.00510313	0.0161675
Apobec2	-2.70445	0.85363	35.7434	2.25094e-09	2.88744e-08
LOC118568492	-2.70944	0.669266	32.9858	9.28343e-09	1.07138e-07
Tslp	-2.71567	0.453795	41.7191	1.05374e-10	1.65109e-09
Ccr1l1	-2.73796	1.30924	39.2614	3.70707e-10	5.38515e-09
S100a4	-2.75141	1.70888	25.4881	4.45109e-07	3.9117e-06
Cxcr2	-2.75178	1.73016	11.7649	0.000603569	0.00255762
Tmem44	-2.80974	5.23454	156	8.46468e-36	1.27412e-33
Clec4n	-2.8143	2.68016	15.1938	9.7023e-05	0.000514342
Tbx19	-2.90857	-0.116484	30.7456	2.94169e-08	3.14841e-07
Gm30604	-2.92202	-0.113726	33.5859	6.81863e-09	8.08957e-08
Gm40579	-2.93325	-0.0793838	38.5427	5.35697e-10	7.61002e-09
[truncated: 14 more rows]

## Sheet: F WT NX vs WT CIH
Gene name	logFC	logCPM	LR	PValue	FDR
Erdr1_1	-3.27855	2.97652	27.135	1.89731e-07	0.000549385
G530011O06Rik	-2.36473	5.95953	30.1786	3.94025e-08	0.000142617
Mid1-ps1	-2.33624	4.84137	32.0199	1.52605e-08	7.3647e-05
Mid1	-2.03148	5.60909	37.3398	9.92365e-10	1.29231e-05
Gm33272	-1.87751	3.58692	36.1951	1.7852e-09	1.29231e-05
Gm10076	-1.33238	4.00863	19.4253	1.0461e-05	0.0252424
Fmr1nb	2.53371	0.248652	13.8063	0.000202659	0.293409
Xlr3a	3.04855	-0.142917	18.0727	2.12631e-05	0.0388498
LOC118568479	3.83799	4.87418	18.0545	2.14669e-05	0.0388498

## Sheet: F 5X NX vs 5X CIH
Gene name	logFC	logCPM	LR	PValue	FDR
Ptpn5	3.41924	-0.320715	24.8855	6.08e-07	0.00286505
Celsr3	2.2158	0.206011	23.9979	9.64e-07	0.00340628
Syt7	2.34259	0.0979269	21.4905	3.56e-06	0.00837289
Unc79	1.84996	0.687159	20.6352	5.56e-06	0.0112145
LOC115487644	1.77058	0.146515	20.1513	7.15e-06	0.0112318
Miat	2.8761	0.605588	20.2121	6.93e-06	0.0112318
Rtl1	2.99021	0.305319	18.8744	1.4e-05	0.0197245
Rpl34-ps1	-1.2545	5.52464	32.9757	9.33e-09	0.000131842
Rn7sk	-4.35976	5.58283	21.6204	3.32e-06	0.00837289

## Sheet: F WT CIH vs 5XFAD CIH
Gene Name	logFC	logCPM	LR	PValue	FDR
Mamdc2	9.66633	7.01681	2241.3	0	0
Gpnmb	9.47735	8.81468	917.417	1.60568e-201	8.25594e-199
Dkk2	8.91344	5.19959	1595.3	0	0
Gfap	8.40738	6.91497	355.218	3.09681e-79	4.35628e-77
Atp6v0d2	8.20447	4.48754	736.084	4.25835e-162	1.54869e-159
Yipf7	8.14246	1.39311	185.419	3.17989e-42	1.57526e-40
Lgi2	7.94668	5.40626	885.036	1.75743e-194	8.735e-192
Baiap2l2	7.52829	6.50447	2099.92	0	0
Cst7	7.39004	9.83416	1842.58	0	0
Tmem163	7.32715	3.99357	823.237	4.78731e-181	2.23074e-178
Dcstamp	7.21588	3.87501	935.924	1.52232e-205	1.03179e-202
Mcoln3	6.99874	2.25116	248.463	5.61835e-56	4.52839e-54
Hectd2os	6.94318	0.270962	117.675	2.04217e-27	5.22313e-26
Trpm1	6.9166	4.22857	991.766	1.10675e-217	9.16821e-215
Spp1	6.90458	9.35979	357.681	9.00628e-80	1.29128e-77
Fabp5	6.78969	6.36507	1690.12	0	0
Hpse	6.71305	6.33914	1432.15	2.17252654585006e-313	4.62779190359576e-310
Asb11	6.64804	1.40834	163.877	1.60945e-37	6.6478e-36
Tmem178	6.56469	2.63005	309.277	3.13861e-69	3.41604e-67
Cited4	6.55735	2.74054	448.945	1.22381e-99	2.3099e-97
Klrb1a	6.47697	-0.159314	69.2266	8.7777e-17	1.18127e-15
Rgs16	6.45412	4.5552	1337.21	9.27072e-293	1.72795e-289
Apoc4	6.40071	1.8881	97.1072	6.56739e-23	1.31799e-21
Wif1	6.19188	0.975534	149.108	2.71541e-34	9.8755e-33
Gm1673	6.14272	4.58187	534.953	2.36245e-118	6.07354e-116
Kcnk9	6.06748	5.05672	510.258	5.57344e-113	1.27855e-110
Fabp3	6.04731	4.32308	918.844	7.85866e-202	4.18502e-199
Pianp	6.0394	5.67564	788.031	2.15954e-173	8.94468e-171
Actr3b	6.0282	4.5322	708.033	5.35792e-156	1.81573e-153
Igf1	5.83645	7.30756	799.081	8.54927e-176	3.64223e-173
2900052N01Rik	5.63672	2.27325	124.106	7.98413e-29	2.22526e-27
Ctnna3	5.59054	2.10277	242.391	1.18411e-54	9.05446e-53
Ctse	5.50466	5.30578	815.513	2.28676e-179	1.03327e-176
Serpinb1c	5.49413	1.00359	124.289	7.28229e-29	2.03414e-27
Ahnak2	5.48291	3.36388	472.89	7.53302e-105	1.58204e-102
Egln3	5.3773	5.39224	1301.5	5.32848e-285	8.8281e-282
Etl4	5.29406	5.94757	1576.98	0	0
Cspg4	5.20811	5.82208	214.889	1.17809e-48	7.289e-47
Kcnk3	5.20075	2.09718	162.197	3.74762e-37	1.53942e-35
Lox	5.15465	5.46094	919.127	6.82181e-202	3.76741e-199
Abi3bp	5.14939	2.43916	294.248	5.90184e-66	5.98655e-64
Rab7b	5.13413	5.87154	922.73	1.12384e-202	6.70301e-200
Ctla2a	5.13006	2.60994	183.22	9.60256e-42	4.69455e-40
Sox7	5.1209	3.07346	276.356	4.67484e-62	4.38406e-60
Trpc4	5.05386	2.04807	190.2	2.8746e-43	1.47804e-41
Ch25h	5.02118	5.78373	919.316	6.20642e-202	3.55938e-199
Lpl	4.97017	8.87249	1038.31	8.44671e-228	7.40876e-225
Itgax	4.85216	9.15601	1113.62	3.61642e-244	3.85174e-241
Scml4	4.81566	0.949242	135.679	2.34483e-31	7.39192e-30
Trpm6	4.78968	2.17182	179.983	4.88735e-41	2.3135e-39
Aldh1a1	4.78062	2.38157	124.288	7.28475e-29	2.03414e-27
Serpina3n	4.69918	0.325556	54.4781	1.57188e-13	1.66111e-12
Minar1	4.67742	5.25249	940.078	1.90333e-206	1.35146e-203
Cox6a2	4.66143	5.14889	480.356	1.78753e-106	3.86288e-104
BC021767	4.61631	1.99509	113.208	1.94305e-26	4.73411e-25
Tcap	4.61363	2.25298	186.349	1.99184e-42	9.90013e-41
Gm6166	4.60938	-0.194829	62.2361	3.04648e-15	3.73877e-14
Igfbp5	4.60858	4.22021	311.506	1.0262e-69	1.14192e-67
Gm30873	4.60454	-0.416831	57.0058	4.34537e-14	4.84258e-13
Ppp1r3c	4.56148	2.33428	236.452	2.33529e-53	1.71535e-51
Cd200r4	4.54192	4.7551	926.001	2.18556e-203	1.41691e-200
S100b	4.50615	2.84596	94.6164	2.31101e-22	4.46945e-21
Cck	4.43237	2.80415	247.346	9.84114e-56	7.80539e-54
Dio2	4.42864	1.52457	73.2906	1.11897e-17	1.59056e-16
Cd5	4.38422	3.25731	384.056	1.6293e-85	2.47903e-83
Gm9899	4.37477	-0.167718	55.8331	7.88921e-14	8.54459e-13
Pkp2	4.32908	1.14367	104.214	1.81645e-24	4.00076e-23
Efr3b	4.32364	5.43476	333.972	1.31109e-74	1.69997e-72
Csf1	4.31897	8.67278	1163.37	5.57611e-255	6.3958e-252
Clec7a	4.30763	8.53338	978.938	6.7977e-215	5.33477e-212
Arnt2	4.2601	5.14025	607.099	4.78303e-134	1.4264e-131
Axl	4.25044	9.07937	940.548	1.50439e-206	1.1216e-203
Fxyd6	4.24209	2.42968	228.403	1.3293e-51	9.1342e-50
Chst2	4.21429	6.73188	1082.77	1.8366e-237	1.7116e-234
Cd28	4.19942	3.10468	208.855	2.44171e-47	1.45633e-45
Ank	4.19692	9.21743	1199.62	7.36302e-263	9.9809e-260
Atp1a3	4.18807	7.36905	1243.15	2.55421e-272	3.80858e-269
Bhlhe40	4.18331	5.73352	1102.43	9.77612e-242	9.71811e-239
Chst3	4.177	3.2183	288.172	1.2442e-64	1.22054e-62
Ldlrad3	4.17446	4.0992	439.308	1.5311e-97	2.85378e-95
Cfap161	4.14372	1.35081	87.5205	8.34104e-21	1.44117e-19
Olfr112	4.11946	0.653668	95.9731	1.16454e-22	2.28781e-21
Scrg1	4.10142	-0.368189	38.4608	5.58635e-10	4.19005e-09
LOC118568382	4.06276	-0.656579	36.0695	1.90406e-09	1.34175e-08
Sel1l3	4.04074	1.99143	128.422	9.07535e-30	2.67436e-28
Fam20c	4.00648	6.64242	1163.94	4.19019e-255	5.20667e-252
Apoe	3.99567	13.4595	560.517	6.48782e-124	1.7275e-121
Acaca	3.98477	6.55596	587.999	6.82648e-130	1.92056e-127
Npas4	3.98356	1.90382	87.8571	7.03581e-21	1.22082e-19
Gm41823	3.97322	-0.325423	40.7557	1.72502e-10	1.37329e-09
Colec12	3.9664	4.7844	211.737	5.74134e-48	3.50857e-46
Kcnh2	3.96616	3.72385	165.056	8.89414e-38	3.70449e-36
Selenbp2	3.96282	-0.0488543	41.5641	1.1407e-10	9.24905e-10
Phlda3	3.96067	2.69741	166.765	3.76474e-38	1.58576e-36
Prrg3	3.95609	0.295282	55.2672	1.0521e-13	1.12862e-12
Gas7	3.94751	5.6851	925.484	2.83202e-203	1.75951e-200
Gm45969	3.94675	1.60497	155.295	1.20693e-35	4.67443e-34
Mcoln2	3.89789	0.923279	87.3927	8.8977e-21	1.5338e-19
A930002C04Rik	3.84859	0.312043	73.4546	1.02978e-17	1.47361e-16
Cpeb1	3.84073	4.41469	603.785	2.51522e-133	7.35382e-131
Fam189a2	3.83175	2.67057	138.797	4.87785e-32	1.6056e-30
Corin	3.83121	1.09887	101.431	7.40147e-24	1.56766e-22
4930556M19Rik	3.79976	1.70346	163.963	1.54148e-37	6.38472e-36
A430093F15Rik	3.79954	2.25042	180.304	4.16037e-41	1.98196e-39
Ak4	3.7944	2.52499	135.183	3.01149e-31	9.43368e-30
Tmem51	3.78484	3.489	355.083	3.31388e-79	4.58016e-77
Kif1a	3.74979	5.10059	210.084	1.31661e-47	7.91612e-46
Cpe	3.71479	5.68568	68.4497	1.30154e-16	1.739e-15
Kif5a	3.7135	6.39745	45.3453	1.65184e-11	1.4463e-10
Fbn2	3.70346	1.61392	77.2315	1.52051e-18	2.30176e-17
Cxcl14	3.6843	3.69101	257.333	6.54385e-58	5.48176e-56
C77080	3.67018	3.19476	245.91	2.02347e-55	1.57145e-53
Lingo1	3.59608	0.782071	75	4.70706e-18	6.8609e-17
Xylt1	3.59064	3.88647	421.943	9.21774e-94	1.61701e-91
C330008A17Rik	3.54965	0.323008	55.5768	8.98772e-14	9.69724e-13
Plxna2	3.5379	3.15243	100.015	1.51225e-23	3.16258e-22
Myo1e	3.52355	7.56405	713.641	3.23206e-157	1.12077e-154
Pdcd1	3.5046	5.5693	422.883	5.7531e-94	1.02124e-91
Wipf3	3.49945	2.70663	188.205	7.83579e-43	3.94728e-41
Rragd	3.48637	4.37429	570.163	5.1742e-126	1.40277e-123
Stac2	3.48042	1.39541	90.1423	2.21637e-21	4.01559e-20
1500009C09Rik	3.47569	1.25273	70.9518	3.66065e-17	5.07285e-16
Hs3st1	3.47257	2.08897	102.905	3.51551e-24	7.60809e-23
LOC118567557	3.43697	0.143895	51.3289	7.81166e-13	7.80172e-12
Gm2065	3.42549	3.26895	249.61	3.15836e-56	2.5876e-54
Mir155hg	3.4058	-0.499645	33.5821	6.83168e-09	4.52542e-08
Gm5182	3.40439	3.6033	333.008	2.12662e-74	2.73362e-72
C3	3.40235	5.12632	232.157	2.01818e-52	1.41282e-50
Adora1	3.39246	3.41681	283.594	1.23708e-63	1.1978e-61
Bcar3	3.38545	3.23341	219.27	1.30534e-49	8.38965e-48
Armc2	3.38406	2.00904	126.401	2.51174e-29	7.27234e-28
F2r	3.3792	1.45636	88.3708	5.42648e-21	9.47473e-20
Fgf1	3.37919	4.43257	727.762	2.74731e-160	9.75361e-158
Sh3pxd2b	3.37755	5.35264	508.347	1.45164e-112	3.23066e-110
Gm13391	3.37228	4.63337	530.48	2.22109e-117	5.51978e-115
Hcar2	3.37088	6.33041	417.727	7.62574e-93	1.32218e-90
Ptchd1	3.33711	6.57417	531.518	1.32021e-117	3.33654e-115
Gm16183	3.30256	2.59865	199.732	2.38982e-45	1.32471e-43
Ghr	3.29827	2.22501	153.177	3.50412e-35	1.31944e-33
Maff	3.29554	4.03023	198.178	5.21716e-45	2.87059e-43
Serpinb6b	3.29347	1.38536	81.443	1.80386e-19	2.91097e-18
Klrb1b	3.25205	3.04233	221.942	3.4099e-50	2.21065e-48
Rai14	3.24917	4.59798	542.869	4.48016e-120	1.17199e-117
Nceh1	3.24614	6.77201	751.464	1.92818e-165	7.18778e-163
Gm52546	3.24462	3.3846	210.819	9.1028e-48	5.49521e-46
Flt1	3.24267	6.41926	49.0818	2.45509e-12	2.33617e-11
Ifi27l2a	3.21783	5.42895	318.963	2.43667e-71	2.88359e-69
Cd6	3.18673	0.0140732	40.8236	1.66607e-10	1.32992e-09
Gm30474	3.17604	-0.023443	28.3727	1.00069e-07	5.74338e-07
Slc41a2	3.17025	1.52287	71.136	3.33434e-17	4.62927e-16
Lilrb4a	3.15244	7.87408	783.036	2.63298e-172	1.06109e-169
Kynu	3.13077	2.90607	167.584	2.49395e-38	1.05947e-36
Inf2	3.12549	5.19074	355.081	3.3174e-79	4.58016e-77
Pacsin1	3.09011	4.99935	410.787	2.4707e-91	4.1394e-89
Gas2l3	3.07094	4.57385	456.515	2.75649e-101	5.48027e-99
Tox2	3.06475	2.22817	113.465	1.70683e-26	4.17221e-25
Anxa2	3.03235	5.02014	348.402	9.44559e-78	1.29214e-75
Lgals3	3.03009	5.06273	321.051	8.5514e-72	1.02831e-69
Ldlr	2.99484	5.37263	454.296	8.37925e-101	1.64399e-98
Zbtb16	2.98369	2.58761	136.045	1.95056e-31	6.18826e-30
Sulf2	2.9766	6.24566	876.524	1.24516e-192	5.9892e-190
Dab1	2.97646	1.0417	53.7216	2.31006e-13	2.40372e-12
Rftn2	2.96911	2.59847	193.52	5.41949e-44	2.8758e-42
Ptprt	2.96281	1.09402	46.2509	1.04039e-11	9.28383e-11
Gabre	2.95057	0.855821	75.4485	3.75061e-18	5.50989e-17
Gvin-ps6	2.94638	-0.229265	22.3346	2.29039e-06	1.08903e-05
Cdk18	2.94479	4.2769	252.982	5.81317e-57	4.81556e-55
Ptger4	2.9268	4.36861	379.326	1.74462e-84	2.62768e-82
Slc2a6	2.92458	4.2925	293.656	7.94213e-66	7.948e-64
St8sia6	2.9193	5.69323	467.088	1.37879e-103	2.85544e-101
Slc45a3	2.91374	1.85845	82.7468	9.32646e-20	1.52653e-18
Gm32914	2.91357	0.241803	34.546	4.16302e-09	2.82287e-08
Cacnb4	2.90359	2.78564	175.314	5.11301e-40	2.30333e-38
Alcam	2.89405	3.7025	207.976	3.79689e-47	2.24665e-45
Kdf1	2.89069	-0.0783129	38.1414	6.5798e-10	4.88603e-09
Ifi44	2.88623	2.52374	91.8827	9.19679e-22	1.6993e-20
Chst10	2.86697	4.19074	451.65	3.1558e-100	6.11119e-98
Zfp618	2.86432	0.995746	54.0978	1.90754e-13	1.99883e-12
Cpq	2.86043	5.3217	392.062	2.94444e-87	4.57339e-85
Rims1	2.86021	1.71863	25.6179	4.16163e-07	2.19195e-06
Cacna1a	2.85802	6.71924	696.31	1.89742e-153	6.2872e-151
LOC68395	2.8534	2.27521	101.198	8.32399e-24	1.75557e-22
Bambi	2.84977	2.9671	176.998	2.19215e-40	1.01199e-38
Ddah1	2.84591	0.873894	34.5902	4.06953e-09	2.76324e-08
Capg	2.83785	6.6852	696.246	1.95897e-153	6.35003e-151
Cxcr4	2.82766	4.7834	347.913	1.20659e-77	1.63559e-75
Fam107a	2.81349	3.44922	38.2794	6.13059e-10	4.57066e-09
Ccl3	2.80747	7.29543	128.247	9.91328e-30	2.90978e-28
Creg2	2.8004	1.37772	88.8003	4.36752e-21	7.67973e-20
Cd300lf	2.79676	4.35049	238.707	7.52585e-54	5.6109e-52
Myo5a	2.79417	7.27671	777.152	5.00904e-171	1.91512e-168
Olfr114	2.78706	-0.218646	27.5197	1.55506e-07	8.73679e-07
Oas1g	2.783	3.33837	141.75	1.10312e-32	3.73831e-31
Vat1	2.76265	6.32535	512.717	1.62613e-113	3.78863e-111
Pgk1-rs7	2.75411	-0.391531	31.1394	2.40153e-08	1.49143e-07
Cdkn2a	2.74376	1.3235	63.4893	1.61242e-15	2.01195e-14
Gm15283	2.74251	0.429904	42.1773	8.33605e-11	6.87114e-10
LOC118568792	2.73266	1.17144	73.3978	1.05983e-17	1.51516e-16
Scd1	2.72841	3.33298	48.3572	3.5523e-12	3.30639e-11
Gm30845	2.72344	2.00208	127.192	1.68682e-29	4.92215e-28
Btla	2.71699	2.82998	69.2897	8.50115e-17	1.14612e-15
Ddn	2.71538	2.31142	22.5866	2.00876e-06	9.61562e-06
Rab11fip4	2.70828	4.35133	502.901	2.22261e-111	4.87372e-109
Galnt9	2.70669	0.727056	49.8536	1.65653e-12	1.60393e-11
Gm10561	2.69838	-0.158647	30.5493	3.25483e-08	1.98417e-07
Col2a1	2.68587	-0.0303568	16.2262	5.62103e-05	0.000212351
Gm44026	2.68214	0.238747	20.8432	4.98453e-06	2.25965e-05
Rasl11a	2.67836	-0.043876	36.5177	1.51289e-09	1.07576e-08
Apoc1	2.67343	0.208511	29.2914	6.22705e-08	3.66278e-07
Ndrg2	2.67296	5.23027	86.9482	1.11401e-20	1.90712e-19
Gm34643	2.67177	0.540075	47.2119	6.37133e-12	5.79639e-11
Lgals3bp	2.66749	9.66799	339.711	7.3768e-76	9.82103e-74
Aplp2	2.66722	8.73717	526.174	1.92043e-116	4.69434e-114
Tmem205	2.66116	3.5179	184.551	4.91782e-42	2.42012e-40
Stra6l	2.66098	1.50792	38.367	5.86141e-10	4.38752e-09
Psat1	2.65943	7.21679	810.767	2.46072e-178	1.07917e-175
H2-Q7	2.65472	2.47251	59.4212	1.27291e-14	1.49688e-13
Gm30757	2.64701	0.438153	39.8317	2.76818e-10	2.15655e-09
Ramp1	2.63449	6.09718	394.057	1.08314e-87	1.70008e-85
Adssl1	2.61955	6.27758	594.827	2.23357e-131	6.40475e-129
Wfdc17	2.61908	3.89999	101.118	8.66456e-24	1.82482e-22
Gm41914	2.61717	0.830274	58.0728	2.52592e-14	2.89056e-13
Ntm	2.6098	1.30004	47.4082	5.76406e-12	5.25354e-11
Mt2	2.60899	2.52537	116.519	3.6582e-27	9.26102e-26
Oasl2	2.60729	5.803	114.102	1.23764e-26	3.05032e-25
Mocos	2.60695	2.39559	152.154	5.86408e-35	2.16434e-33
Ass1	2.59237	1.72841	94.7306	2.18141e-22	4.24081e-21
Plekhb1	2.5921	3.24124	25.5022	4.41886e-07	2.31557e-06
Robo2	2.58416	0.729656	18.0014	2.20737e-05	8.97574e-05
2310034O05Rik	2.58118	0.908064	43.7288	3.77189e-11	3.20106e-10
Ascl4	2.57976	-0.227247	26.6776	2.40397e-07	1.30823e-06
Slc7a2	2.57688	1.84328	46.4463	9.41648e-12	8.44312e-11
Dact1	2.56906	3.53512	201.533	9.6665e-46	5.43914e-44
Slc1a2	2.56874	5.05831	25.9218	3.55524e-07	1.89059e-06
Hif1a	2.5653	8.81793	781.754	5.00262e-172	1.963e-169
Acpp	2.56251	-0.385558	20.7853	5.13764e-06	2.32355e-05
Gpm6b	2.55807	4.54322	48.71	2.96747e-12	2.79166e-11
Mif	2.55716	6.37104	459.118	7.48023e-102	1.50727e-99
Phlda1	2.55259	2.93548	112.487	2.79459e-26	6.74275e-25
Clec1a	2.5496	2.95292	145.589	1.59685e-33	5.66919e-32
Vegfa	2.53984	4.26215	179.857	5.2066e-41	2.45682e-39
Asb10	2.5272	5.65254	425.814	1.32408e-94	2.37871e-92
Gm34194	2.52172	0.267606	39.8324	2.76715e-10	2.15655e-09
Nexn	2.52168	3.41461	197.146	8.76187e-45	4.71654e-43
Antxr2	2.51634	3.50717	184.399	5.30803e-42	2.60356e-40
Tmem151a	2.51152	2.19063	29.8639	4.63468e-08	2.77541e-07
LOC115488490	2.50749	0.0138449	26.2011	3.0765e-07	1.64776e-06
Col9a2	2.50555	1.81886	104.625	1.47568e-24	3.25983e-23
Dram1	2.49676	1.35677	77.2628	1.49658e-18	2.26783e-17
Gm5424	2.49585	1.027	46.8692	7.58852e-12	6.86188e-11
Shc3	2.49391	0.983295	23.5553	1.21375e-06	5.99873e-06
Tnfsf8	2.49298	5.28334	449.582	8.89439e-100	1.70031e-97
Wasf3	2.48467	2.12129	36.0179	1.95508e-09	1.3764e-08
Il3ra	2.48427	4.88006	211.293	7.1736e-48	4.36594e-46
Fgf13	2.48321	4.29078	413.548	6.19122e-92	1.04906e-89
Gbp6	2.47204	2.9725	92.1495	8.03686e-22	1.49052e-20
Sv2b	2.46171	0.344496	35.0222	3.25971e-09	2.23268e-08
St14	2.45283	7.05249	608.029	3.0019e-134	9.13496e-132
Dmc1	2.45147	-0.150606	29.7628	4.88268e-08	2.91222e-07
Atp10a	2.45128	3.57081	155.607	1.03151e-35	4.02638e-34
Nbl1	2.45098	4.91584	274.742	1.05084e-61	9.73232e-60
Gfra1	2.44997	0.205823	26.5459	2.57344e-07	1.39132e-06
Rpl21	2.44655	6.82271	144.341	2.99326e-33	1.04771e-31
Klrb1c	2.44488	1.12416	53.2131	2.99249e-13	3.08583e-12
Zc3h12d	2.43755	1.08455	52.4449	4.4249e-13	4.49453e-12
Kif5c	2.43213	2.98594	50.4434	1.2265e-12	1.20239e-11
Arap2	2.42763	5.50285	515.001	5.17799e-114	1.24531e-111
Mak	2.41654	-0.0553783	24.9736	5.81197e-07	2.99766e-06
Anxa5	2.4122	6.93938	346.481	2.47375e-77	3.32307e-75
Trib3	2.411	0.757184	37.1888	1.0723e-09	7.73914e-09
LOC118567924	2.40774	5.14593	52.4238	4.47263e-13	4.53992e-12
Plekhh2	2.40501	5.30115	639.401	4.51055e-141	1.40118e-138
Fzd9	2.39916	0.790247	49.8021	1.70062e-12	1.64449e-11
Tmem202	2.39824	0.552418	37.5802	8.77288e-10	6.39669e-09
Sdc3	2.39495	8.7144	318.151	3.66166e-71	4.29914e-69
Adamts1	2.39065	6.06312	59.0303	1.55266e-14	1.81071e-13
Gm32854	2.38916	1.28141	45.6	1.45042e-11	1.27715e-10
Ccl4	2.38587	7.42712	73.3749	1.07221e-17	1.52993e-16
Rapgef4	2.38507	3.32861	24.1459	8.93044e-07	4.48658e-06
Cdo1	2.37589	1.49458	43.9262	3.40988e-11	2.91041e-10
Arhgap24	2.36779	5.5212	514.128	8.01877e-114	1.8979e-111
Fgr	2.36566	4.9669	311.557	1.00032e-69	1.12149e-67
C030034L19Rik	2.36549	2.11727	87.0461	1.06019e-20	1.81916e-19
Rftn1	2.36493	5.78598	578.644	7.3953e-128	2.04206e-125
Rgs11	2.36488	4.04869	248.757	4.84682e-56	3.92777e-54
Bcas1	2.36443	2.24932	17.2865	3.21456e-05	0.000126671
9130214F15Rik	2.3591	1.05663	40.2838	2.19628e-10	1.73091e-09
Abca8b	2.35766	0.0122287	22.1812	2.48096e-06	1.17366e-05
Il1r1	2.35339	3.79649	236.24	2.59807e-53	1.89901e-51
LOC118568626	2.34783	3.63383	212.38	4.15614e-48	2.55029e-46
Ripk4	2.34602	-0.358681	21.3069	3.91323e-06	1.7976e-05
Oas3	2.3452	3.4957	62.817	2.26829e-15	2.8022e-14
Plxnc1	2.34396	3.96488	228.028	1.60438e-51	1.09237e-49
Gla	2.34379	4.4164	326.208	6.43664e-73	7.86694e-71
Slc6a16	2.33657	0.15739	15.7829	7.10414e-05	0.00026318
Olfr110	2.32868	3.49816	250.876	1.67302e-56	1.37825e-54
Cxcl13	2.32746	2.03299	20.5752	5.7333e-06	2.57188e-05
Gm36304	2.31864	0.144229	30.6659	3.0651e-08	1.87387e-07
Etv4	2.31595	2.50706	82.7427	9.34588e-20	1.52803e-18
Cd52	2.31567	7.15185	410.681	2.6056e-91	4.3169e-89
Rxrg	2.30408	3.94437	102.331	4.69716e-24	1.00776e-22
Cybb	2.2994	6.73237	203.854	3.01205e-46	1.76128e-44
Mtss2	2.29767	3.37384	50.8783	9.8276e-13	9.72392e-12
Cd72	2.29416	5.15467	261.426	8.39019e-59	7.19e-57
Ppm1j	2.29095	2.34099	96.8672	7.41357e-23	1.47984e-21
Scg3	2.28999	1.61495	22.7363	1.85825e-06	8.93532e-06
Kcnj2	2.28534	7.89071	475.467	2.07075e-105	4.41099e-103
Adgrg3	2.28491	1.09032	34.5087	4.24345e-09	2.87218e-08
Prnp	2.28243	4.14618	72.7342	1.4834e-17	2.08866e-16
Crip1	2.2786	3.72276	78.4185	8.33675e-19	1.28552e-17
Ptk7	2.27742	1.37666	48.5147	3.27826e-12	3.07242e-11
Plau	2.27654	8.20613	247.514	9.04679e-56	7.21373e-54
LOC118568088	2.26958	1.40371	64.3961	1.0176e-15	1.28046e-14
F2rl1	2.26123	-0.185386	12.6171	0.000382245	0.00122231
Baalc	2.26114	1.21547	23.6068	1.18167e-06	5.84992e-06
Ccl6	2.26068	8.20319	366.309	1.1908e-81	1.75802e-79
Adcy1	2.25619	0.567287	10.8943	0.000964621	0.00282972
Gvin3	2.25202	5.7675	175.711	4.18834e-40	1.91571e-38
Cpd	2.24751	7.77456	429.831	1.76897e-95	3.21672e-93
Pdgfc	2.23852	2.4356	81.3609	1.88042e-19	3.02825e-18
Gpr65	2.2377	5.36653	304.705	3.11027e-68	3.31266e-66
LOC118567875	2.23762	1.72817	67.8561	1.75874e-16	2.32076e-15
Oas1a	2.23517	5.14241	116.933	2.96981e-27	7.55679e-26
Tmem154	2.2299	4.38009	297.305	1.27327e-66	1.30039e-64
Rap2b	2.22379	5.70999	327.618	3.17317e-73	4.00976e-71
Arhgap26	2.22177	4.108	366.943	8.66743e-82	1.2924e-79
Cacna1e	2.21896	2.16667	56.6806	5.12673e-14	5.65838e-13
Slfn5	2.21688	5.94853	83.8549	5.32456e-20	8.85111e-19
Efna5	2.21356	1.3598	48.466	3.36064e-12	3.14172e-11
Mrgpre	2.21322	4.48248	242.438	1.15649e-54	8.88884e-53
Pla2r1	2.19785	-0.754452	9.35034	0.00222945	0.00598978
Clic4	2.19633	5.68063	197.251	8.3122e-45	4.4907e-43
Sox5	2.19394	0.98407	29.9978	4.32541e-08	2.6017e-07
Treml2	2.19392	5.39701	321.471	6.9253e-72	8.39537e-70
Gm30712	2.19049	0.500372	33.5596	6.91121e-09	4.57494e-08
Ndufa1	2.18579	4.48531	161.275	5.9577e-37	2.43384e-35
Optn	2.18473	3.84669	237.432	1.42774e-53	1.05916e-51
Tst	2.18459	0.991344	46.9654	7.22522e-12	6.54527e-11
Olfr111	2.18089	6.90868	276.48	4.39189e-62	4.14478e-60
Plaur	2.17221	5.72129	189.679	3.7366e-43	1.9081e-41
Ephx1	2.17139	6.09299	319.403	1.95367e-71	2.3305e-69
Crlf2	2.1707	8.06631	397.746	1.70464e-88	2.73311e-86
Lrfn4	2.16627	2.2908	86.6033	1.32625e-20	2.26267e-19
Apbb2	2.16132	6.12017	679.43	8.89124e-150	2.82079e-147
Il4i1	2.16015	-0.197208	23.2699	1.40789e-06	6.90336e-06
Ifi204	2.15959	5.69334	96.9781	7.00985e-23	1.40301e-21
Arhgef26	2.14804	0.0177712	17.7636	2.50117e-05	0.000100417
Gm7609	2.14	0.251875	26.82	2.23312e-07	1.22239e-06
Tafa3	2.13161	1.43191	52.7977	3.69741e-13	3.77617e-12
Uck2	2.13061	2.49819	82.0769	1.30894e-19	2.12379e-18
H2-Q9	2.12956	1.52096	24.1914	8.72197e-07	4.39369e-06
Lrrc27	2.12511	2.6236	97.3097	5.92886e-23	1.19305e-21
Fxyd5	2.1173	4.89328	237.31	1.51782e-53	1.1204e-51
Socs2	2.11708	2.84886	124.349	7.06608e-29	1.98049e-27
Cd300lb	2.11204	3.10826	152.619	4.64003e-35	1.73402e-33
Plp2	2.1099	2.27346	62.3193	2.92047e-15	3.59004e-14
Gm15337	2.10911	1.14142	42.3578	7.60117e-11	6.28624e-10
Gm40106	2.10618	-0.0966723	24.5286	7.32135e-07	3.72971e-06
H19	2.10184	1.55582	5.64056	0.0175496	0.0372024
Ankrd55	2.09959	-0.152228	21.6763	3.22746e-06	1.50436e-05
Gm13889	2.08368	5.26281	105.452	9.7244e-25	2.16742e-23
F630206G17Rik	2.08306	0.368685	26.642	2.44866e-07	1.32929e-06
Tpi-rs11	2.0815	-0.118504	19.6747	9.18102e-06	3.99004e-05
LOC118568604	2.07735	0.014503	21.5635	3.42305e-06	1.58562e-05
Thy1	2.0762	1.19275	44.0588	3.18657e-11	2.72761e-10
5730552O08Rik	2.0737	0.693148	31.0449	2.52133e-08	1.56063e-07
Ifi207	2.07206	5.27236	158.98	1.89042e-36	7.61837e-35
Kbtbd11	2.07126	3.67511	167.952	2.07255e-38	8.85496e-37
Samd9l	2.05341	5.32831	129.224	6.05853e-30	1.796e-28
Gnas	2.05038	10.2507	398.146	1.39463e-88	2.26036e-86
Lyz2	2.0458	10.0761	226.485	3.48364e-51	2.31895e-49
Ttyh2	2.04447	4.52859	317.747	4.48306e-71	5.22241e-69
Ptpru	2.04347	1.806	47.6889	4.99511e-12	4.58916e-11
Slc16a8	2.04224	2.13906	47.8013	4.71681e-12	4.3415e-11
Gm12163	2.04152	-0.134239	22.9135	1.69456e-06	8.20645e-06
Slc4a11	2.03961	0.0794983	13.5847	0.00022804	0.000765491
Tpi1	2.03798	7.45343	286.634	2.69216e-64	2.62371e-62
Gm32673	2.0369	-0.00490422	20.3367	6.49419e-06	2.88113e-05
Cep170b	2.02535	2.25026	66.6549	3.23451e-16	4.18661e-15
Pgk1	2.02146	7.11796	266.796	5.66411e-60	5.05734e-58
Synpo	2.02014	2.21016	28.7017	8.44279e-08	4.88136e-07
Eml2	2.01943	3.7709	137.031	1.187e-31	3.81452e-30
H2-Q6	2.01905	1.80244	27.3426	1.70418e-07	9.51724e-07
Aifm2	2.01772	1.88181	57.1111	4.11878e-14	4.59694e-13
Ccrl2	2.01556	5.55406	58.6904	1.84538e-14	2.13637e-13
Ifi211	2.01417	3.0607	67.465	2.1446e-16	2.81746e-15
4930597O21Rik	2.01042	0.119716	23.291	1.39253e-06	6.83251e-06
Masp1	2.00655	5.22877	235.759	3.30661e-53	2.38188e-51
Cd74	2.00576	9.69111	67.3156	2.31346e-16	3.03128e-15
Cd63	2.00397	8.96654	222.311	2.83291e-50	1.84461e-48
Nim1k	2.00203	0.809392	29.8862	4.58162e-08	2.74584e-07
Ifitm3	2.0006	5.47286	106.616	5.40303e-25	1.21883e-23
Gm42323	1.99808	-0.0425261	18.2555	1.93167e-05	7.91948e-05
Gng12	1.99263	7.20441	438.501	2.29427e-97	4.22345e-95
Zbp1	1.99187	4.018	45.9761	1.19702e-11	1.05991e-10
Sdr39u1	1.98581	0.0952425	20.6412	5.53911e-06	2.49377e-05
Pld3	1.98559	8.81268	395.63	4.92375e-88	7.81042e-86
Rps27a-ps2	1.98297	1.97138	31.6249	1.87014e-08	1.1786e-07
Satb2	1.98181	2.49979	73.9344	8.0756e-18	1.16007e-16
Abca5	1.97922	2.61718	89.5129	3.04639e-21	5.42709e-20
Sec14l5	1.97776	0.663965	7.0024	0.00814004	0.0189118
H2-Q5	1.97681	3.68016	108.747	1.84351e-25	4.2817e-24
Igfbp6	1.97652	0.188955	22.624	1.97009e-06	9.44264e-06
Dgat2	1.9759	1.71337	50.1453	1.42773e-12	1.38871e-11
B230217C12Rik	1.97556	0.980906	42.9483	5.62063e-11	4.70574e-10
Usp18	1.97024	4.39118	64.9475	7.69204e-16	9.72824e-15
Rassf3	1.96518	6.53535	510.046	6.19742e-113	1.40015e-110
5930430L01Rik	1.96383	1.44608	39.6347	3.06187e-10	2.37049e-09
Cnn3	1.96073	2.95401	49.0211	2.53225e-12	2.40346e-11
Dlgap3	1.96024	1.10226	12.7681	0.000352577	0.0011372
Plekha6	1.96004	2.39367	50.8586	9.92646e-13	9.81521e-12
Hsf4	1.95693	1.74085	60.7976	6.32563e-15	7.63119e-14
Prr15	1.95419	1.97566	73.1423	1.20629e-17	1.70979e-16
Oasl1	1.95301	2.60949	24.3282	8.1243e-07	4.12326e-06
Perp	1.94021	3.25996	102.691	3.91708e-24	8.42821e-23
Runx2	1.93705	1.5299	48.3721	3.52546e-12	3.28551e-11
Gm8129	1.93439	0.463083	15.1877	9.73375e-05	0.000350919
B4galnt4	1.93298	-0.301204	13.5389	0.000233663	0.00078278
Ydjc	1.93207	2.0193	57.6551	3.12346e-14	3.531e-13
Gm10155	1.92494	0.284981	29.3983	5.89282e-08	3.47579e-07
Fam78b	1.92393	0.901152	40.7926	1.69274e-10	1.34975e-09
Zbtb42	1.92236	1.81032	40.5153	1.95086e-10	1.54238e-09
Stard4	1.92167	3.66126	187.301	1.23468e-42	6.15731e-41
Pkm	1.9203	9.36743	327.146	4.02259e-73	4.9984e-71
H1f3	1.91983	0.509721	10.1725	0.00142549	0.00400669
H2-D1	1.91137	10.4613	207.747	4.25903e-47	2.51014e-45
Bcl2a1d	1.91135	3.09079	93.2677	4.56796e-22	8.64376e-21
Nlrc3	1.90419	2.89692	110.253	8.62411e-26	2.01874e-24
Phf11a	1.90351	2.1845	30.6155	3.14565e-08	1.92233e-07
Gm39518	1.89722	2.12077	55.093	1.14961e-13	1.22792e-12
Ntn3	1.89598	0.151821	25.5859	4.23114e-07	2.22542e-06
Rims2	1.89448	0.195169	19.3305	1.09936e-05	4.70512e-05
Gadd45b	1.89086	3.6963	25.9976	3.41839e-07	1.82237e-06
Dpp7	1.89028	6.90812	415.222	2.67643e-92	4.58716e-90
Rasl10b	1.89023	1.28877	14.6394	0.000130162	0.000459808
Arrdc4	1.88903	5.85143	293.89	7.06395e-66	7.11693e-64
Dgki	1.88764	1.0735	35.2766	2.86052e-09	1.97079e-08
Dna2	1.88552	4.71738	168.703	1.42023e-38	6.1029e-37
Gadd45a	1.8838	1.69697	48.729	2.93885e-12	2.76649e-11
Ikbke	1.87706	2.7361	31.4347	2.0626e-08	1.29225e-07
Marchf3	1.87263	2.86519	95.1241	1.7882e-22	3.49461e-21
Gm7336	1.87055	3.26746	37.6225	8.58464e-10	6.27171e-09
Rph3a	1.86773	0.886251	13.671	0.000217791	0.000734061
Mcam	1.86192	3.25717	12.7564	0.000354788	0.00114285
Cyp51	1.85792	4.80496	200.873	1.34659e-45	7.52021e-44
Sorbs1	1.85735	3.89229	50.6541	1.10165e-12	1.08642e-11
Tmod2	1.85723	2.28532	23.8453	1.04397e-06	5.20973e-06
Cd44	1.8566	3.87847	175.619	4.38554e-40	1.99978e-38
Rab15	1.85418	0.211327	10.0335	0.00153718	0.00428509
Rab11fip1	1.85131	2.08513	59.0296	1.55315e-14	1.81071e-13
Gm10076	1.84974	4.45544	21.8593	2.93387e-06	1.37786e-05
LOC118568508	1.84956	0.190539	16.8103	4.13081e-05	0.000160027
Scn3b	1.84027	-0.318967	18.0351	2.16868e-05	8.82804e-05
Aldoc	1.83939	3.3287	17.1867	3.38809e-05	0.000133087
1700003F12Rik	1.83468	3.16039	65.2242	6.68435e-16	8.48981e-15
Rem1	1.83168	-0.289895	10.776	0.00102823	0.00299509
Rsad2	1.82381	3.41092	40.5887	1.87891e-10	1.48865e-09
4930486L24Rik	1.82236	1.99536	46.3863	9.70909e-12	8.68981e-11
Tsc22d1	1.82215	5.82149	235.114	4.57104e-53	3.27686e-51
Ctsb	1.81724	12.4765	264.742	1.58792e-59	1.39279e-57
Dhcr24	1.81656	3.04062	49.0532	2.4911e-12	2.36742e-11
Rgs6	1.8157	-0.201417	13.9383	0.000188913	0.000643563
Ctsd	1.80873	14.1591	326.423	5.77988e-73	7.12263e-71
Mmp12	1.80856	2.60075	40.5781	1.8891e-10	1.49593e-09
Gcm2	1.80759	-0.344996	12.9103	0.00032677	0.00106039
Insyn1	1.80599	-0.145582	13.8524	0.000197741	0.000671338
Mlc1	1.80547	1.4601	10.8464	0.000989867	0.00289353
Sh3bgrl	1.80541	5.02453	229.208	8.87081e-52	6.12373e-50
Gm46591	1.8052	1.48318	47.5792	5.28257e-12	4.83835e-11
Fbxo2	1.80176	0.256739	15.3955	8.71942e-05	0.000317497
Drp2	1.79793	0.278963	15.1246	0.000100642	0.000361609
Akap5	1.79723	4.46686	234.516	6.173e-53	4.38312e-51
Prdx4	1.79466	5.35845	259.437	2.27618e-58	1.92842e-56
Fyn	1.79354	5.25718	240.439	3.15488e-54	2.36394e-52
Iqcg	1.79256	1.26218	32.1235	1.44676e-08	9.22299e-08
Ifit2	1.78998	5.54775	38.9283	4.39671e-10	3.33975e-09
Gm36043	1.78879	2.0824	45.3123	1.6799e-11	1.46915e-10
Fmn1	1.78302	5.02281	274.081	1.46359e-61	1.34713e-59
Gyg	1.7824	5.4302	244.283	4.58015e-55	3.53858e-53
Gpr137c	1.78234	2.28496	53.4272	2.68351e-13	2.77874e-12
Serpine1	1.77909	5.69508	133.381	7.46309e-31	2.28505e-29
Serpine2	1.77184	10.0423	289.818	5.44849e-65	5.41617e-63
Ppp1r3e	1.76695	1.7715	47.4449	5.65709e-12	5.15919e-11
Glb1	1.76506	7.31295	385.455	8.08038e-86	1.24213e-83
Fgl2	1.76368	6.09644	117.883	1.83957e-27	4.72115e-26
Tyrobp	1.76219	9.97269	194.38	3.51739e-44	1.87314e-42
Rab3d	1.76194	3.61218	126.377	2.54244e-29	7.34696e-28
Selenom	1.76171	3.3435	76.7056	1.98442e-18	2.9649e-17
Rimklb	1.76156	0.54423	10.1295	0.00145917	0.00409056
Glipr1	1.7592	3.89564	157.096	4.877e-36	1.94441e-34
Slc16a3	1.75717	6.45766	246.302	1.66218e-55	1.29763e-53
Plin2	1.75643	5.7824	302.048	1.17923e-67	1.22961e-65
Il27ra	1.75611	1.1544	34.8319	3.5944e-09	2.45628e-08
Megf9	1.75523	3.30344	80.934	2.33381e-19	3.73785e-18
Gm12070	1.75418	1.49363	43.4991	4.24149e-11	3.58328e-10
H2-T-ps	1.75373	1.39731	30.9628	2.63027e-08	1.62469e-07
Insig1	1.75225	5.15053	227.496	2.09576e-51	1.41028e-49
Gm6311	1.74915	0.105515	22.7679	1.82797e-06	8.79821e-06
Pcdhb22	1.74782	3.27382	102.815	3.68003e-24	7.94108e-23
Adarb1	1.74498	5.95996	327.321	3.68308e-73	4.61499e-71
Lrpap1	1.74306	7.74036	305.54	2.04607e-68	2.19489e-66
Gm28913	1.74169	0.547133	19.3926	1.06419e-05	4.57428e-05
Gm26797	1.74102	1.50498	20.0127	7.69299e-06	3.37577e-05
Gm12164	1.73872	0.765536	25.3511	4.77884e-07	2.49065e-06
Ctsl	1.73846	10.5044	275.717	6.44042e-62	6.00207e-60
Mdfic	1.73588	4.51703	193.109	6.66422e-44	3.51131e-42
Rnd2	1.73281	2.19445	62.5082	2.65338e-15	3.2725e-14
C920009B18Rik	1.73248	1.79289	49.0032	2.55548e-12	2.42215e-11
Arpin	1.73245	0.20536	21.7225	3.15078e-06	1.47139e-05
Zfp503	1.72281	1.88614	50.1844	1.39953e-12	1.36306e-11
Igsf10	1.72183	2.70196	67.9063	1.71455e-16	2.26847e-15
Ly9	1.72135	7.08402	225.397	6.01622e-51	3.96937e-49
Pebp1	1.72128	6.27946	330.241	8.51796e-74	1.08557e-71
Trim6	1.72115	0.0279997	13.0595	0.000301753	0.000986342
Nlrc5	1.7195	5.76567	76.767	1.92363e-18	2.87984e-17
Bex3	1.71886	3.43461	96.1381	1.07142e-22	2.10765e-21
Asrgl1	1.71479	3.11521	61.6873	4.02569e-15	4.90417e-14
Gcnt2	1.71341	5.97789	268.644	2.24113e-60	2.02531e-58
Gm5805	1.71211	3.07985	22.2282	2.42096e-06	1.14709e-05
Fth1	1.71018	10.5689	312.044	7.83281e-70	8.8481e-68
Gsn	1.70907	4.65905	125.914	3.21028e-29	9.20548e-28
Chst11	1.70893	6.91617	338.649	1.25639e-75	1.65788e-73
Gusb	1.70025	9.1598	362.494	8.06353e-81	1.17878e-78
Gm13456	1.69876	3.97948	66.7956	3.01164e-16	3.90492e-15
Tcim	1.69858	4.53359	141.487	1.2593e-32	4.25792e-31
Cadm4	1.6981	3.44333	67.7625	1.84421e-16	2.43139e-15
Scd2	1.69766	8.17453	300.798	2.20773e-67	2.27031e-65
Rpl21-ps11	1.69472	-0.29895	15.4679	8.39192e-05	0.000306096
LOC118568759	1.69311	1.7289	27.3714	1.679e-07	9.38715e-07
B3gnt7	1.68455	3.15595	78.9399	6.4027e-19	9.96562e-18
Agap1	1.68192	4.86429	247.61	8.6189e-56	6.90948e-54
Reps2	1.68023	2.80885	61.7299	3.93944e-15	4.80302e-14
Rps28	1.67886	6.72671	42.9417	5.63948e-11	4.71887e-10
Got1	1.67766	6.12085	259.182	2.58714e-58	2.17948e-56
Rpl38	1.67739	6.52689	56.2665	6.32843e-14	6.9232e-13
Gucy2g	1.67203	-0.246417	9.98168	0.00158106	0.00438852
Gm5820	1.67193	1.25129	31.8948	1.6275e-08	1.03311e-07
Trnp1	1.67041	-0.00394329	10.0606	0.00151475	0.00422966
Hectd2	1.66935	3.63392	134.45	4.35463e-31	1.34993e-29
Atp2a1	1.66352	1.42562	38.1452	6.56728e-10	4.87916e-09
Cdk1	1.66103	2.78463	64.3205	1.0574e-15	1.32942e-14
Dtna	1.65967	1.88959	12.0527	0.000517178	0.00160995
Rps27	1.65864	7.16147	40.888	1.61204e-10	1.28955e-09
Ankrd33b	1.65536	1.67601	25.0185	5.6784e-07	2.93485e-06
Il1rn	1.65408	1.80111	34.6097	4.02903e-09	2.73823e-08
Gm9794	1.6504	6.75854	97.4278	5.58565e-23	1.12856e-21
Nes	1.65025	4.53986	56.4067	5.89305e-14	6.46587e-13
Rpsa	1.64923	8.87254	190.597	2.35505e-43	1.21509e-41
Gpi1	1.64344	8.1531	300.935	2.06111e-67	2.13425e-65
Enpp1	1.64293	4.81633	202.52	5.88677e-46	3.37606e-44
Prr5l	1.64129	4.28987	129.158	6.26137e-30	1.85245e-28
Idi1	1.63659	2.4712	65.1741	6.85645e-16	8.70099e-15
Mrc2	1.63477	8.36511	306.159	1.49924e-68	1.61993e-66
Gnptab	1.63099	6.41753	289.087	7.86168e-65	7.76328e-63
Gm12474	1.6304	2.09498	34.4179	4.44617e-09	2.99579e-08
Pdzk1ip1	1.62982	0.751532	22.0566	2.64724e-06	1.24875e-05
Gm6807	1.62766	1.8243	19.6503	9.29879e-06	4.03065e-05
Cd69	1.62696	0.991351	16.6218	4.56224e-05	0.0001756
Muc3a	1.62664	0.405295	15.061	0.000104094	0.000373381
Tnf	1.62127	5.06657	26.7464	2.31979e-07	1.26659e-06
Gpc1	1.61967	1.53503	37.9754	7.16416e-10	5.29098e-09
Aldoa	1.61595	9.15374	260.791	1.15396e-58	9.83241e-57
Stum	1.6145	0.804069	18.2997	1.88732e-05	7.75683e-05
Dll1	1.61433	2.87123	54.5378	1.52484e-13	1.61369e-12
Gm5425	1.61195	0.229025	15.1284	0.00010044	0.000361018
Gm11545	1.61162	4.62063	105.76	8.32323e-25	1.86069e-23
Pak6	1.61126	-0.120679	11.5808	0.000666368	0.00202945
Ifitm2	1.61062	3.86427	122.856	1.49973e-28	4.1032e-27
Prkg1	1.61047	3.3344	97.288	5.99412e-23	1.20456e-21
Car13	1.61006	0.933738	30.8109	2.84429e-08	1.74748e-07
Ptgs2	1.59614	3.27126	19.0723	1.25856e-05	5.32381e-05
Tigar	1.59482	3.9998	179.305	6.87205e-41	3.23247e-39
Tshz2	1.59443	-0.386196	6.85478	0.00884044	0.0203165
Rpl36a-ps2	1.59264	3.17556	37.8266	7.73205e-10	5.68224e-09
Tspo	1.59006	5.8653	141.45	1.28301e-32	4.32828e-31
Tsku	1.58714	0.193106	12.1334	0.000495275	0.00154878
Milr1	1.58663	5.14161	187.918	9.05313e-43	4.54516e-41
Tuba4a	1.58239	3.30588	66.3498	3.77596e-16	4.86212e-15
Rpsa-ps10	1.58143	4.78308	123.761	9.50068e-29	2.63317e-27
Gm7331	1.5812	0.731284	19.3267	1.10158e-05	4.71323e-05
AA414768	1.58089	1.86033	45.6397	1.42128e-11	1.25401e-10
Rps12-ps4	1.58033	1.119	28.342	1.01664e-07	5.8327e-07
Mt1	1.57381	5.79659	220.591	6.72144e-50	4.33867e-48
Bcl2	1.57347	4.65837	137.569	9.05271e-32	2.94727e-30
Ephb1	1.57114	-0.280051	6.57985	0.010314	0.0233053
Fndc4	1.5711	2.89619	74.5006	6.06207e-18	8.73348e-17
S100a1	1.56839	3.26466	76.3134	2.42034e-18	3.59341e-17
Rpl23	1.56806	7.9052	113.063	2.09009e-26	5.0758e-25
Rpl21-ps15	1.56604	6.69886	203.735	3.1972e-46	1.85837e-44
Gm32438	1.56602	0.911704	28.774	8.13365e-08	4.70811e-07
Rpl41	1.56537	8.22463	192.138	1.08558e-43	5.69968e-42
Helz2	1.56526	4.93462	41.217	1.36229e-10	1.09564e-09
Gm4841	1.56452	0.431637	13.182	0.000282654	0.000933063
Eef1a1	1.5631	12.3276	200.978	1.27776e-45	7.16269e-44
Adcy3	1.5598	4.61985	202.953	4.73612e-46	2.72665e-44
Fuom	1.55971	2.08947	43.5656	4.09977e-11	3.46748e-10
Gm15590	1.5594	1.23436	29.3988	5.89128e-08	3.47579e-07
Nfil3	1.5569	3.74336	69.9912	5.95703e-17	8.12675e-16
Sdc1	1.55584	0.0253485	12.2563	0.0004637	0.00145962
Phactr3	1.55288	0.213793	10.7908	0.00102007	0.00297387
Cd68	1.55243	9.82046	264.1	2.19204e-59	1.90032e-57
Ung	1.5514	1.11115	17.3189	3.16022e-05	0.00012478
Gm17828	1.55081	1.48096	20.0709	7.46253e-06	3.28338e-05
Smco4	1.55042	1.7676	32.5224	1.1783e-08	7.57311e-08
Srebf2	1.54891	6.70592	249.524	3.29751e-56	2.68684e-54
Gria1	1.5477	0.579357	9.27935	0.00231752	0.00619625
Uba52	1.54679	8.02007	170.847	4.83149e-39	2.09425e-37
Rpl32	1.54652	7.9806	129.932	4.24083e-30	1.27234e-28
Aldh2	1.54589	7.0728	197.027	9.30124e-45	4.98888e-43
Gpd2	1.5457	3.73481	125.992	3.08739e-29	8.88727e-28
Rpl36a	1.54559	6.85066	111.467	4.67569e-26	1.12089e-24
Mdk	1.54416	1.79094	37.5496	8.91194e-10	6.48224e-09
Ptprz1	1.54301	1.76745	11.0488	0.00088743	0.00262393
Luzp2	1.54153	0.725296	11.1715	0.000830629	0.00247019
Hmgn3	1.54032	3.68184	125.454	4.04814e-29	1.14975e-27
Rtcb	1.54025	7.50048	177.854	1.42578e-40	6.623e-39
Slc44a1	1.53793	6.35799	267.588	3.80679e-60	3.41947e-58
Ube2c	1.53737	1.28555	25.8879	3.61836e-07	1.9221e-06
Gm15772	1.53523	3.93725	97.0455	6.77527e-23	1.35788e-21
Cmpk2	1.53322	3.28918	32.5707	1.14934e-08	7.40617e-08
Gpr153	1.52899	1.62853	23.1556	1.49411e-06	7.29013e-06
Trerf1	1.52805	2.52991	54.7243	1.3868e-13	1.47178e-12
Zap70	1.52602	-0.300489	9.51445	0.00203861	0.00552886
Ldha	1.52539	7.736	197.341	7.94583e-45	4.30838e-43
Gpx3	1.52503	3.66186	47.0941	6.76599e-12	6.14794e-11
Eepd1	1.5184	5.04694	175.401	4.89406e-40	2.21138e-38
Gm28809	1.51713	2.22822	48.3732	3.52354e-12	3.28551e-11
Sqle	1.51672	3.45965	110.815	6.49444e-26	1.53956e-24
Snhg11	1.51563	2.03727	10.8129	0.00100797	0.00294357
Gm20559	1.51508	3.96543	58.2982	2.25251e-14	2.58562e-13
Tcf24	1.51472	2.45933	54.2743	1.74371e-13	1.83619e-12
Mobp	1.5147	4.04557	7.06664	0.00785323	0.0183316
Ctsz	1.51461	11.0432	200.518	1.6101e-45	8.95827e-44
Pdzrn3	1.50756	0.302898	12.2876	0.000455966	0.00143862
LOC118567435	1.50737	0.207591	12.5682	0.000392371	0.00125389
Gm14681	1.50672	2.10397	30.277	3.74539e-08	2.26378e-07
Alkbh2	1.50653	3.71172	96.5317	8.78277e-23	1.74149e-21
Tspan17	1.50401	2.76799	51.9784	5.61135e-13	5.66108e-12
Gm11808	1.50172	6.24669	137.431	9.70444e-32	3.15257e-30
Tub	1.50137	0.290041	7.50469	0.00615383	0.0147334
Kcna3	1.50133	2.85284	44.2736	2.85539e-11	2.44975e-10
Cyp4f18	1.50094	3.1492	57.9573	2.67874e-14	3.05372e-13
Rell1	1.50053	4.78552	117.954	1.77452e-27	4.56205e-26
Nrap	1.50013	1.90764	23.047	1.58085e-06	7.68572e-06
Rpl19	1.4985	8.67297	154.124	2.17536e-35	8.25362e-34
Pcsk1n	1.49849	1.85971	11.6811	0.00063138	0.00193118
Crppa	1.49584	0.143551	11.3446	0.000756691	0.00227114
Gm6789	1.49543	0.020592	11.666	0.000636539	0.00194505
Ifi206	1.49534	2.71053	17.7277	2.54891e-05	0.000102196
Rian	1.49439	0.441957	6.40675	0.0113687	0.0254151
Rps5	1.4943	8.31893	132.277	1.30122e-30	3.9678e-29
Ifit3b	1.49344	2.70708	17.8434	2.39852e-05	9.66345e-05
Rps15a-ps6	1.49049	0.703836	20.3728	6.37278e-06	2.83352e-05
Gm10819	1.48889	1.40542	21.643	3.28412e-06	1.52839e-05
Thbs1	1.48869	5.19914	227.913	1.69983e-51	1.1521e-49
Cdkn2b	1.48821	0.101985	10.4268	0.00124202	0.00354175
St8sia4	1.48493	5.44021	218.82	1.63608e-49	1.03371e-47
Gm11703	1.48372	3.27575	75.2064	4.23986e-18	6.19809e-17
Kcnq3	1.48335	0.38103	9.07253	0.00259479	0.00685521
Pgam1	1.48228	6.70398	179.078	7.70258e-41	3.60041e-39
Gm10369	1.48087	0.469917	15.3499	8.93266e-05	0.000324549
Zfand2a	1.47966	5.58792	270.606	8.37384e-61	7.66026e-59
Rgs20	1.47819	-0.351385	6.78519	0.00919172	0.0210243
Nrsn1	1.47788	0.489246	7.69632	0.00553336	0.0134137
H2-K1	1.47618	9.45383	140.218	2.38475e-32	7.90199e-31
Zfp365	1.47517	0.810642	11.4512	0.000714463	0.00215874
Dnajb14	1.4718	6.79564	316.113	1.01766e-70	1.1763e-68
Mgst3	1.47084	3.35529	70.3232	5.0342e-17	6.91206e-16
Fasn	1.47081	5.92685	219.048	1.45864e-49	9.33465e-48
Gm5602	1.46953	0.995892	15.373	8.8242e-05	0.000320999
Diaph3	1.46836	0.673277	18.5598	1.64658e-05	6.84859e-05
Hacd2	1.46734	5.64249	234.954	4.95417e-53	3.53453e-51
Capn1	1.46706	4.38919	129.85	4.42051e-30	1.32358e-28
Col16a1	1.46686	0.331	8.10878	0.00440515	0.0109416
Rpl39-ps	1.46684	0.820458	17.1315	3.48784e-05	0.000136645
Rpl30	1.46613	7.78821	54.807	1.32965e-13	1.41314e-12
Rcan2	1.46448	1.16163	13.9436	0.000188376	0.000642029
Rpl5	1.46439	8.91694	180.438	3.8882e-41	1.86421e-39
Synj2	1.46319	5.78792	241.567	1.79053e-54	1.34841e-52
Nrp1	1.4623	8.60954	227.493	2.09967e-51	1.41028e-49
Atp6v0e2	1.46048	1.2701	26.0008	3.41278e-07	1.82002e-06
Npc2	1.46039	9.81055	172.749	1.85735e-39	8.16959e-38
Tnik	1.4593	0.574089	14.3072	0.00015527	0.000539177
Tpm4	1.45866	6.06179	202.285	6.62421e-46	3.78443e-44
Gm11249	1.45843	2.52042	17.0362	3.66732e-05	0.000143188
Prickle1	1.45811	4.12657	167.809	2.22674e-38	9.48656e-37
Gm15880	1.4571	3.06002	55.0378	1.18234e-13	1.26108e-12
Cd22	1.45667	6.05079	137.975	7.38184e-32	2.41383e-30
Slc25a25	1.4562	5.6872	136.108	1.88994e-31	6.00873e-30
Gm4786	1.45277	1.2752	10.5691	0.00114993	0.00330187
Galns	1.45201	5.24964	182.507	1.37447e-41	6.65413e-40
Me1	1.45119	0.943927	13.1698	0.000284495	0.000938103
Pcdhgb1	1.45092	1.42607	26.7012	2.37477e-07	1.29376e-06
9330175E14Rik	1.4496	0.363084	10.2845	0.00134153	0.00379501
Gm10073	1.44848	2.07524	19.5988	9.55282e-06	4.13115e-05
mt-Rnr1	1.44767	6.91985	60.5148	7.30287e-15	8.76756e-14
Sparcl1	1.44744	4.93298	7.57012	0.00593437	0.0142722
Gtf3c4	1.44725	6.82715	246.698	1.36272e-55	1.06945e-53
Slc25a43	1.44427	2.36591	34.6237	4.0001e-09	2.72106e-08
Rpl27a	1.44392	8.48746	107.923	2.79433e-25	6.41019e-24
Rpl39	1.44317	6.76258	69.455	7.81791e-17	1.06072e-15
Esrrg	1.44182	1.24047	27.8898	1.28426e-07	7.27565e-07
Il1b	1.44101	5.7371	31.3544	2.14972e-08	1.34344e-07
Rpl17	1.44038	6.4734	26.751	2.31437e-07	1.26409e-06
Hcst	1.44016	3.47341	59.5908	1.1678e-14	1.37653e-13
Gm10275	1.43965	5.92476	111.475	4.65612e-26	1.11799e-24
Stx3	1.43923	3.98688	113.536	1.64665e-26	4.03172e-25
Fdps	1.4371	4.25333	140.715	1.85693e-32	6.22218e-31
Rps14	1.43701	8.79533	103.422	2.70819e-24	5.88656e-23
Lrrc8c	1.43588	2.68849	51.0604	8.95658e-13	8.89158e-12
Cd244a	1.43582	3.34714	80.3879	3.07672e-19	4.89094e-18
Gm6136	1.43571	5.97259	160.997	6.85279e-37	2.79186e-35
Ell2	1.43559	4.57995	110.394	8.03436e-26	1.88662e-24
Cstb	1.43484	5.24783	157.337	4.32005e-36	1.72698e-34
Rps15a-ps7	1.43458	0.893983	16.6863	4.40977e-05	0.000170303
Irf7	1.43366	4.91256	29.7965	4.79856e-08	2.86779e-07
Cytip	1.43305	3.83851	92.2342	7.70008e-22	1.43162e-20
Paqr8	1.43254	3.07465	29.5125	5.55573e-08	3.28476e-07
H2-Aa	1.43018	7.87209	33.1229	8.6515e-09	5.66546e-08
Lancl2	1.42979	1.93091	37.0628	1.14385e-09	8.23961e-09
Acot1	1.42962	0.983081	25.1685	5.25331e-07	2.72555e-06
Usp12	1.4275	8.17035	264.515	1.77972e-59	1.55189e-57
Myh10	1.42668	5.19156	118.713	1.21029e-27	3.14951e-26
Csrp1	1.42535	3.61112	23.9915	9.67611e-07	4.84163e-06
Efhd1	1.42531	0.0921219	12.0458	0.000519077	0.00161485
Gm9843	1.42382	4.0816	57.6697	3.10036e-14	3.50755e-13
Cdkn1a	1.42328	4.87384	87.1543	1.00378e-20	1.72635e-19
Grrp1	1.42244	0.776995	11.2034	0.000816493	0.00243154
Neil2	1.4218	2.38359	33.679	6.49989e-09	4.31812e-08
Mfsd12	1.42117	6.59903	241.636	1.72968e-54	1.3092e-52
Galc	1.42095	6.61998	255.025	2.08412e-57	1.73611e-55
Lrrc8b	1.4209	3.46022	73.1357	1.21036e-17	1.71392e-16
Tceal9	1.41997	4.58907	138.582	5.43734e-32	1.78582e-30
Rplp0	1.41953	9.44908	171.371	3.71284e-39	1.62352e-37
Speg	1.41896	6.04993	201.889	8.08302e-46	4.56537e-44
Gm10154	1.41781	2.22031	17.6675	2.63081e-05	0.000105141
Prdx6	1.41635	5.21381	216.555	5.10276e-49	3.18357e-47
Acod1	1.41413	0.712331	11.4426	0.000717807	0.00216752
Ly6i	1.41272	0.188529	11.9221	0.000554729	0.00171503
Gm15500	1.41265	5.60025	92.2063	7.80954e-22	1.45016e-20
Rpl23a-ps3	1.41033	4.09594	88.5797	4.88284e-21	8.55558e-20
Sc5d	1.41032	5.0113	173.003	1.63393e-39	7.22952e-38
Rpl37a	1.41017	7.85029	78.2578	9.04347e-19	1.38874e-17
Gm10677	1.41004	0.761678	14.3079	0.000155208	0.00053909
Lsamp	1.40966	0.580053	7.94693	0.00481691	0.0118464
Rpl23a	1.40559	8.27931	110.642	7.08644e-26	1.67193e-24
Bnip3	1.40441	5.73823	92.412	7.03857e-22	1.3119e-20
Rps19	1.40416	7.66857	99.3934	2.07015e-23	4.29917e-22
Pea15a	1.40396	8.47281	196.513	1.2047e-44	6.43848e-43
Rasal1	1.40114	0.515126	11.0938	0.000866152	0.00256661
Map2	1.39995	1.8823	9.58204	0.0019649	0.00534256
Trp53inp2	1.39952	5.29831	182.821	1.1733e-41	5.6987e-40
Gm15682	1.39795	2.76353	45.9528	1.21134e-11	1.07195e-10
Cadm1	1.39592	8.08345	166.399	4.52703e-38	1.89614e-36
Rps16	1.3954	8.19821	92.4971	6.74243e-22	1.25985e-20
Ptprg	1.39532	3.05043	13.578	0.000228853	0.000768046
Fzd7	1.39516	6.00266	117.738	1.97879e-27	5.06971e-26
Plxnd1	1.39449	4.02255	57.201	3.93461e-14	4.40458e-13
Atox1	1.39296	5.72354	152.886	4.0568e-35	1.51987e-33
Rps16-ps2	1.39235	5.1685	84.3422	4.1614e-20	6.96416e-19
Bcl2a1b	1.39032	6.54662	153.097	3.64887e-35	1.37049e-33
Rpl10a-ps1	1.39015	2.86455	56.6927	5.09528e-14	5.62783e-13
C2	1.38866	2.61481	39.0679	4.09329e-10	3.11881e-09
Anxa4	1.38781	5.3464	160.757	7.73301e-37	3.13334e-35
Aopep	1.38687	4.58519	118.81	1.15286e-27	3.01056e-26
Ftl1-ps1	1.38686	4.05511	101.766	6.24747e-24	1.3289e-22
Tmem158	1.38621	0.875546	17.453	2.94492e-05	0.000116818
Cd83	1.38613	7.93205	231.672	2.57471e-52	1.794e-50
Stk32c	1.38528	-0.176237	10.7261	0.00105637	0.00306331
Sdf2l1	1.38455	6.80254	190.804	2.12214e-43	1.09872e-41
Rpl14-ps1	1.38436	6.16626	96.4861	8.9874e-23	1.7797e-21
Shcbp1l	1.38408	1.87229	29.5694	5.39502e-08	3.19734e-07
Gm10240	1.38259	-0.131027	11.5899	0.000663127	0.00202
A730081D07Rik	1.38205	0.783623	15.8891	6.71643e-05	0.000249934
Rpl38-ps2	1.38184	3.45776	19.6101	9.49637e-06	4.10793e-05
Siglecf	1.381	6.06204	230.24	5.28548e-52	3.66566e-50
Aldh1b1	1.38085	1.76928	32.7613	1.04198e-08	6.7552e-08
Coro1c	1.38032	6.72504	232.56	1.64868e-52	1.15959e-50
Rpl6l	1.38016	4.91672	65.8025	4.98458e-16	6.37436e-15
Septin11	1.37998	5.14204	198.288	4.93579e-45	2.72584e-43
Ifit1	1.37997	3.12874	23.6599	1.14955e-06	5.70037e-06
Gm15710	1.37908	2.69901	40.5716	1.89543e-10	1.50015e-09
Rps18	1.37862	8.11866	108.915	1.69435e-25	3.94141e-24
Hip1	1.3761	4.64203	84.9667	3.03433e-20	5.10665e-19
Gm5421	1.37603	0.33702	15.6355	7.68006e-05	0.00028248
Rpl17-ps8	1.3753	0.117131	11.9864	0.000535902	0.00166268
1110008P14Rik	1.37525	1.85746	31.5629	1.93084e-08	1.21378e-07
Dhcr7	1.37384	5.23646	212.777	3.4047e-48	2.09783e-46
Tmem238	1.37322	1.09473	19.8034	8.58293e-06	3.74649e-05
Pmaip1	1.37114	4.39158	91.6053	1.05807e-21	1.94777e-20
Tlr2	1.37039	8.01254	142.664	6.9631e-33	2.39232e-31
Rps26	1.36794	7.6904	135.611	2.42679e-31	7.63415e-30
Mfap3l	1.36791	3.02923	73.5435	9.84444e-18	1.41009e-16
Sptbn1	1.36787	5.88093	58.5652	1.9666e-14	2.27142e-13
Rpl26	1.36751	8.20286	116.142	4.42537e-27	1.11653e-25
Pygo1	1.36719	-0.209198	9.98983	0.00157407	0.00437646
Rps12	1.36714	7.69684	75.6711	3.35081e-18	4.93715e-17
Rpl10-ps1	1.36661	1.22793	25.4919	4.44238e-07	2.32504e-06
Gm34189	1.36606	3.31592	71.8448	2.32801e-17	3.24723e-16
Rgs1	1.3644	5.797	31.2086	2.31736e-08	1.44336e-07
Runx3	1.36318	1.86354	28.5194	9.27628e-08	5.34461e-07
Rpl37	1.36232	7.21657	55.1545	1.11418e-13	1.19179e-12
Rps24-ps3	1.36228	0.6022	19.8402	8.41915e-06	3.67607e-05
Rhoc	1.36199	5.12468	93.8436	3.41462e-22	6.52762e-21
Eef1a1-ps1	1.3617	1.05469	21.1614	4.22183e-06	1.93222e-05
Plppr2	1.36106	0.613127	11.7196	0.000618452	0.0018967
Gm32131	1.36021	0.421642	12.9443	0.000320897	0.00104291
Hexa	1.36003	10.4394	179.11	7.5825e-41	3.55543e-39
Pygl	1.35806	4.88886	143.221	5.25852e-33	1.81925e-31
Lpar1	1.35748	0.202283	9.9459	0.00161208	0.00446632
Rps3a2	1.35591	1.71749	34.2258	4.9075e-09	3.29714e-08
P2ry2	1.35562	1.29089	21.1047	4.34852e-06	1.98655e-05
Abat	1.3556	2.61446	16.2672	5.50087e-05	0.000208076
H2-Ab1	1.35517	7.8628	35.6634	2.3453e-09	1.6311e-08
Rilpl2	1.35513	3.55154	88.6171	4.79135e-21	8.40515e-20
Gm10443	1.35434	3.06105	19.0958	1.24316e-05	5.26166e-05
Gm29901	1.35411	0.868689	21.2627	4.00451e-06	1.83784e-05
B2m	1.35302	11.2248	144.661	2.54767e-33	8.93842e-32
Serpinb6a	1.35294	4.09638	84.851	3.21723e-20	5.40226e-19
Rps3a3	1.35022	1.23323	18.8869	1.38699e-05	5.83232e-05
Trps1	1.35009	3.81192	102.026	5.48046e-24	1.16909e-22
Slc25a13	1.34947	3.04773	60.2905	8.18418e-15	9.77057e-14
B3gnt3	1.34789	1.02314	19.2457	1.14929e-05	4.89493e-05
Ifit3	1.34768	5.03537	26.6525	2.43532e-07	1.32305e-06
Qpct	1.34679	2.16034	33.4184	7.43164e-09	4.90758e-08
Fcho1	1.3463	2.10378	36.1391	1.83724e-09	1.29589e-08
Slc15a3	1.34614	7.99075	208.72	2.61295e-47	1.55226e-45
Ly6c2	1.34592	1.85646	7.46018	0.00630786	0.0150635
LOC118568383	1.34571	-0.254312	8.83816	0.00294997	0.00768643
Hmcn2	1.34391	0.658978	6.76898	0.00927557	0.0211906
Gm12174	1.34347	2.50635	41.8385	9.91341e-11	8.09522e-10
Adcyap1r1	1.34345	1.14792	8.00804	0.00465701	0.0114854
Gdf11	1.34272	1.05466	12.0113	0.000528804	0.00164271
Bfsp1	1.34045	0.182618	11.9725	0.000539913	0.00167478
Rps11	1.34031	5.43502	82.4053	1.10858e-19	1.8046e-18
Rps21	1.34	7.44786	54.1299	1.87666e-13	1.96786e-12
Cd9	1.33992	10.2603	127.004	1.85423e-29	5.40009e-28
Mcf2l	1.33987	0.843518	7.41908	0.00645357	0.0153696
Meox1	1.33983	-0.0708152	8.66306	0.00324726	0.00836556
Shisa7	1.33714	3.78896	76.8606	1.83458e-18	2.7576e-17
Scrn1	1.3371	0.202105	9.51915	0.00203339	0.00551772
Phf11b	1.33671	5.04132	70.4486	4.72417e-17	6.51036e-16
Meg3	1.33622	2.05999	10.4536	0.00122407	0.00349456
Il2rg	1.33584	4.12053	72.5059	1.66529e-17	2.33595e-16
Gm42333	1.33582	1.01375	15.8651	6.80197e-05	0.000252802
Cped1	1.3346	0.458846	9.43123	0.00213322	0.00576448
Fut7	1.33433	1.03696	24.2817	8.32237e-07	4.20661e-06
Rps2	1.33412	8.40393	131.061	2.40054e-30	7.24584e-29
Rps12-ps3	1.33321	6.33212	92.7357	5.97651e-22	1.12378e-20
Slc17a7	1.33295	0.202906	5.0881	0.0240906	0.0490932
Mbp	1.33272	6.77778	38.0277	6.97475e-10	5.16644e-09
Rps2-ps10	1.33265	2.76038	27.1101	1.92193e-07	1.06337e-06
Adgrb1	1.33174	1.39115	5.54454	0.0185384	0.0390542
Ube2l6	1.33165	4.74538	116.861	3.07905e-27	7.82142e-26
Pgam1-ps2	1.3308	0.441117	14.4413	0.000144596	0.000506061
Rpl34	1.32738	7.75115	94.6138	2.31401e-22	4.46945e-21
Map1a	1.32634	1.78859	7.14466	0.00751876	0.0176388
Gm11263	1.32588	-0.085612	9.77584	0.0017682	0.00485286
Egr2	1.32581	5.56054	31.2055	2.3211e-08	1.44499e-07
Rpl13	1.32538	9.09471	120.749	4.33693e-28	1.16729e-26
Rplp2	1.32527	8.25755	104.132	1.89272e-24	4.16258e-23
Efemp2	1.32423	4.31306	110.603	7.22988e-26	1.70308e-24
Creb3l1	1.32364	2.07112	27.3341	1.71168e-07	9.55195e-07
Rpl6	1.32301	8.82668	145.014	2.13263e-33	7.49993e-32
Rpl36	1.32244	7.14546	80.2534	3.29339e-19	5.21314e-18
Gsto1	1.32171	5.13392	132.252	1.31801e-30	4.01079e-29
Tnr	1.32148	-0.343051	5.19772	0.0226165	0.0464055
Tmed3	1.32143	7.0324	227.327	2.28138e-51	1.52545e-49
Lrrc14b	1.32087	1.4001	23.4655	1.27174e-06	6.2708e-06
Adap1	1.32007	6.07447	218.856	1.60702e-49	1.01967e-47
Rps6-ps4	1.31983	4.46012	73.5731	9.69761e-18	1.3904e-16
Nat8l	1.31948	5.74328	226.228	3.96262e-51	2.62607e-49
N4bp3	1.31916	2.04728	11.2793	0.00078376	0.00234201
Kcna2	1.31598	0.570746	10.7906	0.00102014	0.00297387
Usp30	1.3143	5.74839	189.705	3.68835e-43	1.88993e-41
Bmerb1	1.31418	0.0592218	9.22388	0.00238879	0.00636968
Cd274	1.31273	6.23438	180.386	3.99178e-41	1.90774e-39
Rpl9-ps6	1.31173	5.09855	148.571	3.55808e-34	1.28773e-32
Rps29	1.31135	7.66286	22.9481	1.66436e-06	8.06806e-06
Rtkn2	1.31109	0.472255	14.9125	0.000112614	0.000402105
ND3	1.3099	1.89112	19.905	8.13867e-06	3.563e-05
Gm52698	1.30906	0.621113	13.8392	0.000199138	0.000675772
Cd34	1.30897	8.08917	173.282	1.42008e-39	6.32084e-38
Chaf1b	1.30831	1.10351	16.1029	5.99929e-05	0.000225329
Gm39212	1.30675	0.982299	17.1717	3.4148e-05	0.00013403
H1f2	1.30655	5.07228	14.0541	0.000177622	0.000609836
Unc80	1.3041	-0.229541	5.70927	0.0168756	0.036004
Rps25	1.30333	8.35696	110.765	6.66122e-26	1.5766e-24
Dlgap5	1.30316	1.14981	17.6766	2.61825e-05	0.000104751
Ptpn7	1.30314	1.17854	19.4234	1.04718e-05	4.50505e-05
Uqcrh	1.30245	5.87912	112.863	2.31201e-26	5.5965e-25
Nap1l1	1.30136	6.43155	152.303	5.439e-35	2.01243e-33
Rpl14	1.30109	7.83175	119.953	6.47639e-28	1.71832e-26
Akt3	1.30105	6.18923	175.775	4.05445e-40	1.86592e-38
Atp6v1a	1.30083	6.86907	184.707	4.5478e-42	2.24544e-40
Tmem229a	1.30027	1.49477	10.4434	0.00123092	0.0035121
Spryd7	1.29999	3.95707	92.5307	6.62899e-22	1.24021e-20
Iqgap1	1.29966	5.64217	98.7127	2.91921e-23	5.98738e-22
H60b	1.29963	0.25334	9.10053	0.00255535	0.00676171
Gm13436	1.29947	0.638431	12.7638	0.00035339	0.00113933
Rps23	1.29946	8.59186	63.8428	1.34755e-15	1.68568e-14
Unc13a	1.29892	3.56547	58.8981	1.66054e-14	1.92838e-13
Ifi213	1.29785	4.46534	23.807	1.06496e-06	5.30915e-06
Nsa2-ps1	1.29741	2.19467	34.5056	4.25025e-09	2.87548e-08
G0s2	1.29692	0.841223	16.8276	4.09338e-05	0.000158701
Gm7143	1.29673	0.882074	12.9148	0.000325993	0.00105809
Sestd1	1.29654	1.99973	26.2438	3.00917e-07	1.61518e-06
Gm8995	1.29602	8.14496	106.052	7.18162e-25	1.6103e-23
Glipr2	1.29547	1.161	16.1215	5.94067e-05	0.000223464
Chd5	1.29546	1.28347	18.5617	1.64496e-05	6.84375e-05
Gm9616	1.29486	5.13389	67.8833	1.7346e-16	2.29296e-15
Aldh1l1	1.29441	2.01277	30.7279	2.96864e-08	1.81937e-07
Rpl18a	1.29315	8.87097	97.603	5.11253e-23	1.03577e-21
Sp100	1.29311	5.96974	78.0996	9.79717e-19	1.50139e-17
Id2	1.29148	4.88772	58.8895	1.66782e-14	1.93532e-13
Slfn9	1.29012	4.12162	37.0118	1.17415e-09	8.44561e-09
Slc39a2	1.28943	1.3403	24.3088	8.20646e-07	4.15788e-06
Rps6	1.28937	8.87911	129.738	4.67551e-30	1.39433e-28
Gm2000	1.28715	3.98415	70.1542	5.48442e-17	7.50948e-16
Pqlc3	1.28613	3.96155	75.8557	3.05165e-18	4.51869e-17
Hmmr	1.28523	1.18537	22.2148	2.43781e-06	1.15434e-05
Mfsd4b3-ps	1.28453	-0.227816	6.15426	0.0131096	0.0288271
Gm4951	1.28377	3.93043	34.5337	4.18938e-09	2.83816e-08
Gm12918	1.28365	1.99452	29.7922	4.80914e-08	2.87296e-07
Haao	1.28329	4.50587	89.6907	2.78459e-21	4.98451e-20
Gm5786	1.28323	-0.129131	6.66227	0.00984754	0.0223802
H2-Q4	1.2827	6.88908	110.849	6.38497e-26	1.51602e-24
Slc8a2	1.27991	1.20872	17.7972	2.45744e-05	9.8768e-05
2310022B05Rik	1.27987	4.98519	149.627	2.09144e-34	7.64351e-33
Ftl1	1.27871	10.8144	156.983	5.16151e-36	2.05235e-34
Rps20	1.27832	7.83801	105.636	8.85894e-25	1.97748e-23
Rps2-ps13	1.27797	4.21152	91.3994	1.17411e-21	2.14811e-20
Mapt	1.27792	2.61951	9.60789	0.00193743	0.00527462
Slc16a1	1.27707	5.08086	122.035	2.26778e-28	6.14816e-27
Tecpr1	1.27697	6.81201	281.857	2.95746e-63	2.84508e-61
Ddo	1.27692	0.279892	6.8819	0.00870727	0.0200733
Pfkl	1.27668	7.49494	155.005	1.39698e-35	5.39648e-34
2610524H06Rik	1.27647	1.09757	13.4074	0.000250635	0.000835319
Akap1	1.27607	5.48283	114.636	9.4541e-27	2.3417e-25
Sdf4	1.2743	8.3693	190.817	2.1083e-43	1.09536e-41
Gm4332	1.27261	3.41423	35.0407	3.22892e-09	2.21465e-08
Plekhh1	1.26935	2.42459	30.7804	2.88948e-08	1.77378e-07
Ms4a4b	1.26907	-0.228108	5.53257	0.0186657	0.0393007
Cenpb	1.26728	6.47135	124.364	7.01359e-29	1.96948e-27
Tmem106a	1.26702	5.99295	142.594	7.21049e-33	2.47162e-31
Fau	1.26699	8.99493	76.8132	1.87914e-18	2.8189e-17
Tpd52	1.26642	7.63407	175.735	4.13631e-40	1.89774e-38
Timp2	1.26626	9.94667	172.922	1.70177e-39	7.50744e-38
Mirt1	1.26573	1.96464	27.1467	1.88586e-07	1.04458e-06
Rps15	1.26547	8.41308	93.4511	4.16358e-22	7.89862e-21
Bri3bp	1.26521	5.23209	154.368	1.92404e-35	7.35625e-34
Vkorc1	1.26509	5.93716	125.785	3.4263e-29	9.78727e-28
Gm10335	1.26412	4.87623	56.1886	6.58432e-14	7.19786e-13
Magi2	1.26304	0.403738	9.65371	0.0018897	0.0051569
Gm10288	1.2617	1.64971	20.437	6.16252e-06	2.74871e-05
Ddx31	1.26012	5.67549	174.947	6.15003e-40	2.76214e-38
Zfp13	1.25954	0.917658	15.3532	8.91682e-05	0.000324132
Nr4a3	1.25934	1.46489	10.027	0.00154261	0.00429701
Gm13841	1.2587	4.08252	88.9291	4.0921e-21	7.21244e-20
Shank3	1.25823	1.45914	6.6388	0.0099781	0.022643
Ggct	1.25754	1.77164	23.1187	1.52306e-06	7.42167e-06
Pcdh9	1.25684	0.908394	8.97105	0.00274291	0.00720188
Nsun7	1.25669	0.114602	9.1903	0.00243302	0.00647834
Gm13408	1.25668	0.403825	13.0916	0.000296627	0.000971448
Sag	1.2551	0.413889	10.3392	0.00130232	0.00369673
Rpl12	1.25469	8.38926	97.9521	4.28622e-23	8.71921e-22
Rpl31	1.25337	7.38022	81.3607	1.8806e-19	3.02825e-18
LOC118568032	1.25329	0.595517	13.0532	0.000302764	0.000988955
Rpl35	1.25304	7.56342	94.5813	2.35226e-22	4.53746e-21
Msmo1	1.25279	5.28494	147.386	6.46235e-34	2.32193e-32
Rps4x	1.2501	9.13365	110.971	6.0042e-26	1.43246e-24
Nsa2	1.2498	6.40939	118.668	1.23781e-27	3.20992e-26
Cyb5r3	1.24898	5.65589	142.226	8.67892e-33	2.9546e-31
Gm32643	1.24854	2.79602	32.1979	1.39238e-08	8.89539e-08
Chchd10	1.24848	2.7154	39.9011	2.67151e-10	2.08669e-09
Atf5	1.24812	3.78121	28.5401	9.17762e-08	5.28981e-07
Slc43a3	1.24807	2.89864	48.5202	3.26898e-12	3.06564e-11
Mical1	1.24784	6.20509	147.144	7.29758e-34	2.61573e-32
Eef1b2	1.24618	7.84209	118.341	1.4603e-27	3.77374e-26
Rpl9-ps4	1.24508	3.82926	39.5423	3.21026e-10	2.48279e-09
Gapdh	1.24481	4.55545	13.2133	0.000277977	0.000918235
Trem2	1.24443	10.9812	145.259	1.88524e-33	6.64559e-32
Ncan	1.24334	0.72128	7.01595	0.00807869	0.0187751
Eno1b	1.243	2.59914	40.7163	1.76016e-10	1.39902e-09
Olfm4	1.24263	3.82167	51.5043	7.1442e-13	7.14947e-12
mt-Rnr2	1.24165	8.16196	55.3166	1.02596e-13	1.10217e-12
Ggh	1.24095	5.70177	137.257	1.05957e-31	3.42717e-30
P3h4	1.24033	3.183	45.4229	1.58767e-11	1.39257e-10
Naglu	1.23985	8.3251	145.442	1.71919e-33	6.0746e-32
Lmna	1.23734	3.32789	54.8388	1.30831e-13	1.39146e-12
Eef2-ps2	1.23712	3.29167	50.1934	1.39314e-12	1.35772e-11
Rps7-ps3	1.23656	6.2906	97.3487	5.81321e-23	1.17136e-21
Kndc1	1.23629	0.981549	6.51397	0.010703	0.0240968
Nme2	1.23578	6.09767	137.216	1.08142e-31	3.48273e-30
Cenpe	1.23478	2.06917	28.9273	7.51465e-08	4.36846e-07
Fads2	1.23478	2.40106	15.9085	6.64806e-05	0.000247575
Rspo1	1.23405	2.50812	30.4829	3.3683e-08	2.04999e-07
Dubr	1.2336	3.18234	42.8195	6.00322e-11	5.00918e-10
Mx1	1.23253	4.99733	18.8061	1.44704e-05	6.06943e-05
Rack1	1.23137	8.80477	127.462	1.47182e-29	4.30319e-28
Eef2	1.23106	10.6273	149.743	1.97294e-34	7.22813e-33
Gm9118	1.2308	1.7635	18.5299	1.67259e-05	6.95096e-05
Pwwp2b	1.23022	3.86746	78.5008	7.9967e-19	1.23692e-17
Scimp	1.22894	2.35336	35.1977	2.97874e-09	2.04682e-08
Amot	1.22692	0.859778	10.7013	0.00107061	0.00310037
Gm45855	1.22633	2.27798	25.6867	4.01588e-07	2.11967e-06
Dgkz	1.22632	8.19092	173.386	1.34828e-39	6.01923e-38
Rpl9	1.22465	7.95859	115.04	7.71069e-27	1.91943e-25
Lmnb1	1.22371	4.5309	152.336	5.34912e-35	1.9841e-33
Rpl10-ps5	1.22331	1.185	21.1906	4.15796e-06	1.90533e-05
Rpl19-ps11	1.22331	3.50151	22.9206	1.68837e-06	8.18175e-06
Rps15a	1.22293	7.59961	106.077	7.09265e-25	1.59275e-23
Gm11942	1.22258	1.29337	14.8804	0.000114549	0.00040833
Rps3a1	1.22211	9.17427	83.2104	7.37685e-20	1.21677e-18
Slc2a1	1.22144	6.71173	104.023	1.99941e-24	4.3843e-23
Syt11	1.2204	5.59731	137.639	8.73967e-32	2.85158e-30
Rplp1	1.2203	9.67023	85.0048	2.9764e-20	5.01482e-19
Eif3f	1.21997	7.48757	154.542	1.76315e-35	6.77585e-34
Rab13	1.21985	0.356274	12.5041	0.00040607	0.00129378
Eef1g	1.21913	7.65483	138.878	4.68299e-32	1.54487e-30
Olfr99	1.21891	0.130523	10.6402	0.00110656	0.00319147
Gm26728	1.21878	2.47021	32.0284	1.51935e-08	9.67337e-08
Cox7a2l	1.21785	7.31977	109.197	1.46897e-25	3.42248e-24
Cacna1s	1.21607	3.09057	43.4018	4.45773e-11	3.75532e-10
Gm41358	1.21517	0.0309962	9.22255	0.00239052	0.00637316
AI839979	1.21472	0.833722	13.3015	0.000265193	0.000879319
Cox6a1	1.21434	6.83239	122.6	1.70554e-28	4.64924e-27
Cplx2	1.21287	2.00672	9.58738	0.0019592	0.00532803
Gm10709	1.21283	2.12427	14.2679	0.000158547	0.000549406
Gm6477	1.21216	0.247953	8.54654	0.00346179	0.00885399
Zc2hc1a	1.21116	2.4764	43.3841	4.49822e-11	3.78515e-10
Pcgf2	1.21065	2.40031	35.823	2.16083e-09	1.50914e-08
Smpdl3a	1.21064	5.29493	98.1711	3.83748e-23	7.82773e-22
Bst2	1.20888	6.91024	108.288	2.32414e-25	5.3729e-24
Gm15427	1.20743	6.32432	84.9141	3.11605e-20	5.23827e-19
Rpl15-ps3	1.20714	1.11616	16.2144	5.65612e-05	0.000213623
Tomm7	1.20704	4.48529	46.1772	1.08024e-11	9.61069e-11
Syne3	1.20676	0.947364	14.4201	0.000146232	0.000510766
Osbpl3	1.206	4.50495	112.991	2.16782e-26	5.256e-25
Ier5l	1.20565	0.984236	15.8176	6.97524e-05	0.00025879
Rpl4	1.20506	9.47115	123.81	9.27068e-29	2.57901e-27
Fgf2	1.20496	4.3798	83.9955	4.95895e-20	8.25255e-19
Cdca7l	1.20494	0.491238	11.2954	0.000777006	0.00232276
Capn5	1.20458	1.11569	19.5173	9.96915e-06	4.29748e-05
Plek	1.20397	9.80347	148.47	3.74377e-34	1.35166e-32
Gaa	1.20322	8.0603	171.065	4.33157e-39	1.88854e-37
Ropn1l	1.20244	1.18106	12.9234	0.000324504	0.00105395
Gm4204	1.20235	4.0508	72.3478	1.80428e-17	2.52853e-16
Rpl3	1.20143	9.18184	107.662	3.1873e-25	7.30044e-24
Mansc1	1.20087	1.86156	20.6454	5.5271e-06	2.48986e-05
Plekhm2	1.20041	7.12614	152.417	5.13787e-35	1.91049e-33
Gca	1.1998	4.0627	97.6913	4.88972e-23	9.9198e-22
Rps10	1.19935	7.74772	84.1118	4.67566e-20	7.78981e-19
Cntn2	1.19774	2.16698	5.5532	0.0184469	0.038878
Rps3	1.19709	9.05909	84.7028	3.46755e-20	5.81604e-19
Gm5148	1.197	4.1692	44.6263	2.38466e-11	2.05654e-10
Vps13c	1.19638	7.44786	169.128	1.14722e-38	4.94397e-37
Gper1	1.19597	1.59223	10.5946	0.00113419	0.0032592
Slc35e4	1.19551	3.37454	53.0346	3.27731e-13	3.36788e-12
Prelid2	1.19435	2.08502	30.8952	2.72344e-08	1.67737e-07
H2bc4	1.19354	4.81231	20.892	4.85912e-06	2.20696e-05
Eno1	1.19296	8.53659	156.717	5.90237e-36	2.32831e-34
Gm10175	1.19285	0.32252	12.348	0.000441457	0.00139639
Fundc2	1.19149	4.42004	96.1737	1.05231e-22	2.0728e-21
Rpl7a-ps11	1.19057	2.06074	29.6153	5.26877e-08	3.12749e-07
Gstm5	1.19015	3.33484	48.1501	3.94804e-12	3.65875e-11
Nrp2	1.18894	6.5378	154.304	1.98764e-35	7.57998e-34
Pfdn5	1.18876	6.76724	94.0941	3.00878e-22	5.78889e-21
Irak1bp1	1.18848	1.20096	15.1068	0.000101597	0.000364688
Slain1	1.18796	0.612236	8.2318	0.00411627	0.0103329
Plce1	1.18663	1.13833	11.3428	0.000757412	0.00227284
Gm5431	1.18655	4.21446	59.7848	1.05819e-14	1.25128e-13
Gm14586	1.18538	0.848226	15.1294	0.000100389	0.00036096
Bola2	1.18513	4.3687	49.4992	1.98454e-12	1.90913e-11
Enah	1.18509	2.17903	11.4954	0.000697703	0.00211538
Rpl13a	1.18317	9.48136	70.4084	4.8214e-17	6.63822e-16
Rpl17-ps3	1.18262	6.70265	72.1441	2.00043e-17	2.79817e-16
ATP6	1.18223	3.33488	39.2961	3.64176e-10	2.79333e-09
Rpl28-ps1	1.1803	3.54419	50.507	1.18742e-12	1.16484e-11
Gm36048	1.17916	-0.0879246	7.89652	0.00495299	0.012151
Gm5905	1.17884	-0.0581601	8.48053	0.00358967	0.00914654
Postn	1.17642	3.84126	51.1776	8.43748e-13	8.39861e-12
Brsk1	1.17623	1.32802	10.0632	0.00151264	0.00422457
Rps7	1.17398	7.9127	85.9643	1.83213e-20	3.09738e-19
Echs1	1.17307	6.25815	134.548	4.14668e-31	1.28815e-29
Gm16071	1.17268	1.23747	14.2378	0.000161104	0.000557101
Rpl24	1.17266	7.3678	79.4249	5.00899e-19	7.86201e-18
Soat1	1.17073	7.27578	189.462	4.16667e-43	2.12045e-41
Nphp1	1.17051	2.85582	28.6094	8.85517e-08	5.10593e-07
Oas2	1.17037	4.87345	18.571	1.63688e-05	6.81394e-05
Msantd3	1.17016	-0.102721	6.06245	0.0138086	0.0301597
Eif4b	1.16948	8.1978	128.272	9.78672e-30	2.8783e-28
Osm	1.16852	5.47066	46.5385	8.98353e-12	8.06948e-11
Atp5mpl	1.16839	4.47007	61.2824	4.94492e-15	5.99461e-14
Prdx1	1.16711	6.93961	118.175	1.58768e-27	4.08875e-26
Gm6344	1.16706	6.07516	73.3548	1.0832e-17	1.54265e-16
Rps8	1.16596	8.14684	80.707	2.61788e-19	4.18384e-18
Sacs	1.16412	3.53705	53.4992	2.587e-13	2.68252e-12
Tmem160	1.16281	4.96219	53.1296	3.12249e-13	3.21543e-12
Cox4i1	1.1628	7.47263	94.2221	2.82034e-22	5.43334e-21
Hsd17b7	1.1627	2.67902	24.1811	8.76883e-07	4.41339e-06
Cdnf	1.16261	0.271664	11.5328	0.000683781	0.00207909
Bag1	1.16257	6.47943	155.616	1.0272e-35	4.02009e-34
Lsp1	1.16225	7.06402	63.895	1.31229e-15	1.64433e-14
Rpl7a-ps5	1.16132	3.453	15.0666	0.000103784	0.000372449
Atg7	1.16107	4.50089	106.733	5.09426e-25	1.15266e-23
ND4L	1.1608	1.32029	15.2584	9.37584e-05	0.000339163
Gm16315	1.16062	1.00368	15.8708	6.78171e-05	0.000252112
Mpped1	1.15816	-0.00796648	7.36275	0.00665889	0.0158006
Melk	1.15798	0.380427	9.40752	0.00216098	0.00583421
Gcat	1.15791	1.63231	23.1543	1.49508e-06	7.29248e-06
Tmem26	1.15702	0.59979	12.8507	0.000337357	0.00109164
Mapk8ip2	1.15681	0.191388	6.27775	0.0122263	0.0271195
Rpl17-ps10	1.15642	7.17075	39.693	2.97184e-10	2.30437e-09
Fkbp10	1.15576	0.426099	7.85153	0.00507778	0.0124224
Gramd3	1.15527	2.12013	27.5736	1.51231e-07	8.50303e-07
LOC118567690	1.153	2.13966	29.2298	6.42825e-08	3.77369e-07
Plbd2	1.15282	7.37927	191.1	1.82919e-43	9.53671e-42
Rps10-ps2	1.15251	6.5471	99.9718	1.54586e-23	3.22382e-22
Tent5c	1.15218	8.52918	154.393	1.90025e-35	7.28398e-34
Rpl10a	1.15131	8.57534	118.682	1.22929e-27	3.19337e-26
Ssx2ip	1.15046	4.04449	80.5274	2.86696e-19	4.56235e-18
Rps24	1.15006	8.81303	81.8493	1.46872e-19	2.37786e-18
Foxd2os	1.14971	0.224041	8.48595	0.003579	0.00912247
Arhgef5	1.14946	2.32412	25.3777	4.71336e-07	2.45823e-06
Scpep1	1.14886	7.20194	156.719	5.89492e-36	2.32831e-34
Gm44040	1.14828	0.301106	8.82407	0.00297283	0.0077361
Septin3	1.14826	0.817836	9.09405	0.00256442	0.00678102
Hgf	1.14675	2.55745	34.4033	4.47969e-09	3.01565e-08
Rps13	1.14549	7.6204	91.4457	1.14697e-21	2.10363e-20
Eif3h	1.14322	6.91377	120.656	4.5445e-28	1.22095e-26
Itga5	1.14257	6.24186	155.363	1.16617e-35	4.52832e-34
Npm1	1.14143	7.46331	93.5055	4.05076e-22	7.69438e-21
Lamc1	1.14099	4.86632	71.0696	3.44849e-17	4.78329e-16
Cox8a	1.13902	6.57906	103.417	2.71561e-24	5.89409e-23
Coq7	1.13886	2.95477	36.555	1.48416e-09	1.05634e-08
Acot11	1.13846	2.68205	28.6338	8.74403e-08	5.04575e-07
Rpl10	1.13835	9.36753	111.442	4.73376e-26	1.13299e-24
Gm16418	1.1379	0.913401	9.76943	0.00177438	0.00486714
Isg15	1.13771	3.51144	17.2268	3.31723e-05	0.000130441
Atp1b3	1.1377	8.14163	152.529	4.85628e-35	1.8103e-33
Rpl22	1.13719	7.39575	74.3364	6.58767e-18	9.48154e-17
Gm10132	1.13691	3.32883	39.4332	3.39475e-10	2.61597e-09
Rpl11	1.13627	8.10635	63.5187	1.58855e-15	1.98382e-14
Stat1	1.13595	7.38573	67.9779	1.6534e-16	2.1934e-15
Pcdhga4	1.13543	2.9962	31.0832	2.47197e-08	1.53199e-07
Fdft1	1.13477	4.1254	90.1584	2.19837e-21	3.98782e-20
Gm13394	1.13413	0.466179	10.5272	0.0011763	0.00336851
Pabpc1	1.13353	9.29735	136.541	1.51932e-31	4.84073e-30
Abcb1b	1.13341	6.04802	197.443	7.54868e-45	4.10797e-43
Gm12758	1.1314	0.143412	9.46757	0.00209136	0.00565696
Tspan5	1.12943	4.34429	82.8303	8.94078e-20	1.46824e-18
Sil1	1.12892	5.64504	136.854	1.29792e-31	4.162e-30
Mmp19	1.12823	0.937271	13.5385	0.000233719	0.00078279
Txndc16	1.12754	6.31113	123.766	9.48034e-29	2.63243e-27
Bcl6	1.12665	5.19773	118.763	1.17997e-27	3.07598e-26
Gng5	1.12649	6.31066	128.888	7.17472e-30	2.11846e-28
3110082I17Rik	1.12532	3.88068	59.8271	1.03565e-14	1.22755e-13
Rpl18	1.12389	8.11181	67.2419	2.40152e-16	3.1384e-15
AI507597	1.12287	-0.146513	7.53575	0.00604866	0.0145143
Creb3l2	1.12279	5.9089	86.3479	1.50906e-20	2.56868e-19
Gys1	1.12262	4.09899	80.742	2.57191e-19	4.11478e-18
Mxra7	1.12159	2.7253	36.961	1.20516e-09	8.66028e-09
Nrcam	1.12137	0.505492	5.35563	0.0206555	0.0428126
Fuca1	1.12085	7.31829	134.654	3.93001e-31	1.22339e-29
Htatip2	1.11957	3.0035	43.2421	4.83677e-11	4.06087e-10
Slamf7	1.11896	3.37995	49.5377	1.94592e-12	1.8744e-11
Gem	1.11895	4.39597	6.41918	0.0112894	0.025253
Rpl27	1.11618	7.59953	49.7887	1.71229e-12	1.65469e-11
Rpl7	1.11588	8.8607	89.9452	2.44843e-21	4.40925e-20
Abtb2	1.11575	0.188702	7.56449	0.00595294	0.0143145
Gltp	1.11455	7.31527	157.427	4.12935e-36	1.65518e-34
Pcdhgb6	1.11451	1.61521	22.0646	2.63632e-06	1.24399e-05
Afdn	1.11435	5.34592	96.5932	8.51423e-23	1.69049e-21
Rps13-ps2	1.11432	1.18102	14.2421	0.000160738	0.000555966
Gdf15	1.11261	1.20358	8.56394	0.00342887	0.00878637
Gm8292	1.11233	1.25738	9.30507	0.00228521	0.00611993
COX3	1.11197	3.28098	47.8021	4.71488e-12	4.3415e-11
Ctla2b	1.11196	4.64902	77.3905	1.4029e-18	2.12804e-17
Kcna7	1.11132	1.0163	11.2276	0.000805884	0.00240235
Adgrg5	1.10977	0.207688	7.20503	0.00726997	0.017109
Nenf	1.10872	4.92625	56.7877	4.85496e-14	5.38232e-13
Ercc6	1.10808	5.24383	132.96	9.22412e-31	2.81846e-29
Cox6c	1.10739	5.39514	83.1538	7.59113e-20	1.25073e-18
Daam1	1.10657	5.2973	89.6996	2.77214e-21	4.9682e-20
Gm12867	1.10615	0.807653	11.7672	0.000602853	0.00185228
Gm19582	1.10542	0.284896	10.6512	0.00110002	0.00317569
Gm4737	1.10353	1.20025	13.5769	0.000228982	0.000768306
Rab36	1.10319	1.53538	17.6418	2.66657e-05	0.000106484
Ddhd1	1.10274	5.24389	143.786	3.95651e-33	1.3784e-31
H2ac18	1.10271	0.576251	9.46212	0.00209759	0.00567232
TrnP	1.10261	3.8136	53.3289	2.82131e-13	2.91334e-12
Nectin3	1.10219	0.213795	5.12253	0.0236172	0.0482339
Trim72	1.1021	1.46968	13.2234	0.000276474	0.000914485
Micos13	1.10088	4.44624	53.3474	2.79485e-13	2.88801e-12
Erc1	1.10088	2.19132	24.2623	8.40692e-07	4.24359e-06
Slc18a1	1.10041	0.544008	11.3847	0.000740536	0.00222668
Rps10-ps1	1.09924	2.19319	19.3553	1.0852e-05	4.65384e-05
Rps11-ps1	1.09879	0.229582	7.3071	0.00686826	0.0162436
Rpl29	1.09777	7.03364	81.5209	1.73417e-19	2.80457e-18
Cops9	1.09708	4.86488	44.6516	2.3541e-11	2.03255e-10
Rps17	1.09664	7.45601	60.3201	8.06209e-15	9.63252e-14
Dhx32	1.09604	5.51875	143.156	5.43506e-33	1.87164e-31
Gprc5b	1.09501	2.40753	8.44464	0.0036612	0.00930336
Rpl8	1.09486	8.57332	102.145	5.16005e-24	1.10389e-22
Ier3	1.09479	5.27937	22.3422	2.28138e-06	1.08509e-05
Card11	1.09434	4.31678	59.5665	1.18229e-14	1.39251e-13
6330403K07Rik	1.09378	0.279074	9.74244	0.00180062	0.00493639
Limch1	1.09363	1.41165	5.69327	0.0170301	0.0362713
AW112010	1.09345	3.77906	52.9985	3.33803e-13	3.42555e-12
Tmem107	1.09297	0.515015	11.5993	0.000659763	0.00201057
Mtmr11	1.091	2.89047	35.3222	2.79436e-09	1.92901e-08
Gm4366	1.09043	3.25957	40.8765	1.62159e-10	1.29609e-09
Ssr4	1.09043	6.91332	106.951	4.56339e-25	1.03727e-23
Mpeg1	1.08971	11.9087	110.899	6.2252e-26	1.48044e-24
Gm8730	1.08912	1.92135	21.366	3.79439e-06	1.74678e-05
Dipk2a	1.08894	5.36674	164.643	1.09484e-37	4.54738e-36
Eif3k	1.08883	6.07549	98.7441	2.87326e-23	5.90941e-22
Ndufa2	1.08762	5.0701	46.4209	9.53904e-12	8.54274e-11
Tgtp2	1.08654	2.52053	15.2285	9.52527e-05	0.000343818
Phldb1	1.08508	5.14953	75.5645	3.5366e-18	5.20576e-17
Itgal	1.08246	3.89809	26.6115	2.48765e-07	1.34787e-06
Ogfod3	1.08213	3.78559	50.2093	1.38188e-12	1.34763e-11
P4htm	1.08077	0.471423	9.09991	0.00255622	0.00676171
H2-M3	1.0799	6.20799	113.375	1.78605e-26	4.35872e-25
Pgm1	1.07931	5.17183	115.148	7.30248e-27	1.82086e-25
Timeless	1.07894	3.04837	24.6861	6.74693e-07	3.4465e-06
Brdt	1.07849	0.945483	11.9513	0.000546102	0.00169221
TrnC	1.0779	1.29307	8.1559	0.00429212	0.0107005
Plscr1	1.07766	2.38716	26.5852	2.52167e-07	1.36531e-06
Rpl35a	1.07695	7.43895	25.9633	3.47978e-07	1.85178e-06
COX2	1.07549	3.93615	36.9214	1.22988e-09	8.82521e-09
Lrguk	1.07548	5.27725	31.0326	2.53736e-08	1.5699e-07
Cox6b1	1.07535	5.66885	86.1509	1.66713e-20	2.82164e-19
Gm16477	1.07518	1.87692	22.7272	1.86706e-06	8.97186e-06
Gab3	1.07505	2.49024	31.6788	1.81898e-08	1.14878e-07
Rpl3-ps1	1.07501	5.32097	53.1135	3.14815e-13	3.23962e-12
Gm2223	1.07492	1.72766	20.7372	5.26833e-06	2.37999e-05
Plin3	1.07345	4.15074	52.6897	3.90643e-13	3.98146e-12
Gm10177	1.07338	1.91127	14.5866	0.000133866	0.000471887
Ahcy	1.07314	3.39657	56.7486	4.95245e-14	5.48111e-13
Tpt1	1.07119	10.0455	79.8527	4.03391e-19	6.35831e-18
Gm2225	1.07055	0.220398	7.19372	0.00731592	0.0172041
Grasp	1.07012	1.92157	9.34509	0.00223583	0.006003
Guca1a	1.06976	2.57436	20.7938	5.11481e-06	2.31463e-05
Snrpg	1.06955	4.14334	41.4088	1.23498e-10	9.9809e-10
Tmem82	1.06887	0.721226	9.34334	0.00223797	0.00600619
Ifi209	1.06867	4.7937	24.1412	8.95254e-07	4.49466e-06
Pogk	1.06807	6.23349	125.937	3.17396e-29	9.11886e-28
COX1	1.06775	12.2817	73.3801	1.06937e-17	1.52733e-16
Mapkapk2	1.06737	7.48188	156.948	5.25378e-36	2.08349e-34
Prxl2a	1.06598	3.59064	39.9658	2.58445e-10	2.02187e-09
Xdh	1.06597	3.53192	29.1795	6.59737e-08	3.86992e-07
Glmp	1.06596	7.6288	146.242	1.14926e-33	4.09967e-32
Plekhb2	1.06581	6.80477	145.59	1.59579e-33	5.66919e-32
Nuf2	1.0629	1.12138	14.0745	0.000175707	0.000603401
Gpr162	1.06199	4.92404	57.2956	3.74998e-14	4.21054e-13
Tmem132a	1.06053	6.34896	151.3	9.00976e-35	3.30898e-33
Slc2a3	1.06047	4.25539	82.5616	1.02426e-19	1.67098e-18
Lyplal1	1.05764	1.99726	22.3276	2.29876e-06	1.0921e-05
Aldh1l2	1.05651	3.62698	29.3737	5.96827e-08	3.51751e-07
4933432I03Rik	1.05632	0.711722	9.87749	0.00167313	0.00461771
Mfge8	1.05595	5.42316	54.9966	1.2074e-13	1.28689e-12
AI504432	1.05479	4.53752	58.5113	2.02131e-14	2.3292e-13
Gm11478	1.05422	0.281674	6.33304	0.0118509	0.0263902
Gm14303	1.05421	2.15615	11.1881	0.00082323	0.00245014
Gm26947	1.05328	4.03174	67.2862	2.34815e-16	3.07403e-15
Gm38729	1.0529	1.54934	14.0413	0.000178843	0.000613463
Dusp3	1.05254	6.66512	140.448	2.12429e-32	7.07037e-31
Dok4	1.05189	1.82078	23.0294	1.59543e-06	7.74901e-06
Rgs3	1.05085	4.99082	69.6948	6.9229e-17	9.41856e-16
Igbp1	1.05076	5.77649	93.6395	3.78548e-22	7.20885e-21
LOC118567856	1.05009	1.87385	15.6665	7.55519e-05	0.000278506
Atxn10	1.04854	6.8804	117.036	2.81884e-27	7.18492e-26
Atp5e	1.04734	5.57671	53.9378	2.06941e-13	2.16085e-12
Kif21a	1.0471	1.19841	9.07069	0.00259739	0.00686087
Tbc1d4	1.047	5.50816	141.123	1.51229e-32	5.07876e-31
Pacsin3	1.04697	1.04588	11.6815	0.000631233	0.00193113
Prrg1	1.04619	0.0254697	6.59961	0.0102001	0.0230724
Rpl10-ps6	1.04548	-0.0810601	5.8564	0.0155205	0.0334238
Slc25a24	1.04515	1.02589	11.125	0.00085174	0.00252893
Lrp11	1.04257	1.86934	17.8729	2.36161e-05	9.54308e-05
Adam8	1.04189	3.39011	35.4921	2.5609e-09	1.77442e-08
Il12rb2	1.04116	3.65797	49.4785	2.0056e-12	1.92814e-11
P3h3	1.04101	6.07145	154.749	1.58861e-35	6.12087e-34
Adamts17	1.0405	0.0882961	5.51289	0.0188768	0.0396719
Ctsa	1.03934	10.6556	124.592	6.24972e-29	1.75829e-27
Nmb	1.03875	1.50586	16.2855	5.448e-05	0.00020639
Gm8451	1.03861	0.428153	8.36503	0.00382511	0.009677
Rpl37rt	1.03816	4.13904	21.4095	3.70931e-06	1.71025e-05
4930487H11Rik	1.03553	0.574323	10.3806	0.00127344	0.00362372
Siva1	1.03497	3.18399	35.8375	2.14483e-09	1.50008e-08
Gvin1	1.03425	4.03267	39.455	3.35712e-10	2.58965e-09
Camk2n2	1.03413	0.94576	8.0211	0.00462354	0.0114142
Sec61g	1.03349	3.84022	33.4091	7.46757e-09	4.92913e-08
Nrbf2	1.03267	4.88907	92.2708	7.55901e-22	1.40715e-20
Arhgap10	1.03201	1.18474	9.21976	0.00239417	0.00638061
Mir682	1.02979	3.23792	5.82083	0.0158375	0.0340474
Atp1a1	1.02857	8.75828	113.597	1.59665e-26	3.92217e-25
Gm34931	1.02749	0.0101807	6.62783	0.0100398	0.0227553
Srxn1	1.02594	2.94125	34.4894	4.28573e-09	2.89762e-08
Gm15860	1.02479	0.570681	9.97323	0.00158833	0.00440624
Crem	1.02432	3.31486	39.9017	2.67067e-10	2.08669e-09
4930512H18Rik	1.0235	0.394748	5.39927	0.0201451	0.0419223
Metrnl	1.02056	3.08873	29.8479	4.67313e-08	2.79507e-07
Clec9a	1.02043	1.06319	12.2317	0.000469834	0.00147675
Bik	1.02039	1.43381	9.56238	0.00198605	0.00539811
Zfp704	1.02032	5.54945	134.934	3.41406e-31	1.065e-29
Mapk8ip1	1.02011	2.84773	15.4777	8.34838e-05	0.000304955
Creg1	1.01967	8.73096	106.505	5.71371e-25	1.28503e-23
Srebf1	1.01955	6.56335	167.526	2.56747e-38	1.0876e-36
Rpl7a	1.01927	6.59696	61.8379	3.72932e-15	4.55429e-14
Rpl15	1.01883	7.58665	89.1433	3.6723e-21	6.50329e-20
Tmsb10	1.01846	5.9136	89.9514	2.44078e-21	4.40078e-20
Il18bp	1.01799	3.08253	22.7192	1.87482e-06	9.00045e-06
Gm9493	1.01761	3.11135	25.6682	4.05449e-07	2.13854e-06
Scarb1	1.01752	6.1581	112.178	3.26579e-26	7.85424e-25
Kif1c	1.01741	6.21519	101.505	7.12718e-24	1.51387e-22
Gvin2	1.0172	4.29882	57.8664	2.8054e-14	3.18351e-13
Shisa5	1.01642	7.89925	114.527	9.9914e-27	2.47068e-25
Tmem254a	1.01491	4.42106	30.5835	3.19808e-08	1.95277e-07
Grhl1	1.01361	-0.0339607	6.20215	0.0127595	0.0281237
Akr1a1	1.01349	8.54176	95.7008	1.33628e-22	2.62175e-21
Spc25	1.01298	0.350798	8.19975	0.00418961	0.0104943
Dtnbp1	1.01221	5.67	103.915	2.11212e-24	4.62465e-23
Rusc2	1.01062	5.59182	110.078	9.42165e-26	2.20198e-24
Fam162a	1.01024	3.6739	49.0796	2.45781e-12	2.33727e-11
Rttn	1.01007	4.79786	82.7196	9.45568e-20	1.54429e-18
Tmem120b	1.00866	3.67536	60.321	8.05812e-15	9.63252e-14
Gm2a	1.008	8.43099	114.81	8.66291e-27	2.1493e-25
Ptges3l	1.00762	0.296198	7.4037	0.00650898	0.0154868
Foxd2	1.00762	0.642467	10.3491	0.00129538	0.00367905
Itprip	1.0061	4.09567	55.3464	1.01055e-13	1.0864e-12
Gm8325	1.00397	1.35212	5.07125	0.0243259	0.0495185
Coa5	1.00331	6.62796	122.674	1.64355e-28	4.48846e-27
Shcbp1	1.003	-0.0243521	5.50589	0.0189525	0.0397966
Fblim1	1.00233	6.05047	123.303	1.1972e-28	3.28757e-27
Hspa12a	1.00213	4.89299	77.594	1.26553e-18	1.92554e-17
Hmgcs1	1.00195	5.57986	108.542	2.0442e-25	4.74045e-24
Impdh1	1.00193	2.96967	21.6891	3.20607e-06	1.49486e-05
Kcnma1	1.00097	5.27721	89.8367	2.58657e-21	4.64119e-20
Kif11	1.0005	2.09494	16.8813	3.97928e-05	0.000154552
Ptger3	-2.94658	1.99147	133.909	5.71876e-31	1.76547e-29
Gm39847	-2.94024	-0.316351	28.1395	1.12881e-07	6.43168e-07
Gm40579	-2.81211	0.240777	31.5834	1.9106e-08	1.20257e-07
LOC118568492	-2.73957	0.684027	58.4337	2.10261e-14	2.42101e-13
Ccr3	-2.67307	1.2539	65.1483	6.94677e-16	8.8081e-15
Gm29927	-2.60486	1.02317	58.4223	2.11475e-14	2.43311e-13
Ccr7	-2.55133	-0.543519	15.3244	9.05402e-05	0.000328478
Tmem44	-2.53189	5.44229	314.499	2.28699e-70	2.62318e-68
Apobec2	-2.51395	1.1296	63.1221	1.94281e-15	2.41612e-14
5730435O14Rik	-2.48017	0.852882	54.1734	1.83558e-13	1.92749e-12
Gm9618	-2.44744	-0.142171	26.9324	2.10701e-07	1.15932e-06
Gm36884	-2.44235	2.55931	120.389	5.19971e-28	1.38452e-26
Mycl	-2.43587	3.39139	233.301	1.1365e-52	8.03146e-51
Gm36774	-2.38946	0.925057	42.8573	5.88805e-11	4.91583e-10
Gm51448	-2.38216	0.531377	40.1197	2.38862e-10	1.87654e-09
Mmp28	-2.36311	3.22338	223.913	1.26751e-50	8.32593e-49
4930453L07Rik	-2.34903	-0.487214	18.3997	1.79088e-05	7.39923e-05
Hsf2bp	-2.32697	3.37929	120.469	4.99465e-28	1.33708e-26
Gm30723	-2.30461	4.66594	198.087	5.46054e-45	2.99346e-43
Gm52697	-2.29956	2.74003	101.891	5.86597e-24	1.24954e-22
Bank1	-2.28081	4.90167	356.449	1.67066e-79	2.3725e-77
Gm32249	-2.23557	4.83594	302.179	1.10444e-67	1.15974e-65
Gm12958	-2.21633	0.0431441	26.9722	2.06398e-07	1.13859e-06
Adamtsl2	-2.21029	3.16719	97.4481	5.52874e-23	1.11858e-21
Gpr165	-2.20776	4.52779	125.476	4.00437e-29	1.13949e-27
Hlf	-2.20641	4.26702	228.23	1.44972e-51	9.91594e-50
Duoxa1	-2.19891	1.70509	32.2933	1.32568e-08	8.49107e-08
Cd209a	-2.19449	3.35879	69.5319	7.51889e-17	1.02108e-15
Siglecg	-2.16871	2.45221	80.3278	3.17174e-19	5.03126e-18
Cd209c	-2.16605	0.855967	23.2229	1.4427e-06	7.05779e-06
Gm39285	-2.16477	2.89869	121.412	3.10461e-28	8.3864e-27
1700020L24Rik	-2.16274	1.10985	44.0555	3.19201e-11	2.7307e-10
Tmem204	-2.13408	4.56475	188.218	7.78685e-43	3.93592e-41
Sema4b	-2.1309	5.24156	181.091	2.80019e-41	1.34689e-39
Slc5a10	-2.11673	2.00391	65.2632	6.55335e-16	8.33053e-15
Tspan18	-2.10836	5.01434	359.416	3.77414e-80	5.4637e-78
Ccdc162	-2.10642	3.56141	137.241	1.06782e-31	3.44639e-30
LOC118568485	-2.10378	0.882787	35.3418	2.76627e-09	1.91051e-08
Gm9522	-2.08823	1.39546	8.20233	0.00418365	0.010487
Klrd1	-2.08413	1.32852	54.4215	1.61786e-13	1.70607e-12
Ccr1l1	-2.07373	1.40487	50.7113	1.07002e-12	1.05593e-11
Fgf11	-2.07093	4.47071	207.375	5.13552e-47	3.01479e-45
Crybb1	-2.06722	7.16824	461.424	2.35555e-102	4.81146e-100
Hepacam2	-2.05757	0.0305462	18.6564	1.56522e-05	6.53572e-05
Gm35242	-2.04561	0.658845	37.576	8.79181e-10	6.40424e-09
Gm35887	-2.03242	0.279311	25.4684	4.49689e-07	2.35192e-06
Il7r	-2.00901	4.0645	279.245	1.09704e-62	1.04191e-60
Efna4	-2.00336	-0.0321905	24.2806	8.32737e-07	4.2077e-06
Gm11827	-1.99632	0.361107	21.4951	3.54737e-06	1.64015e-05
Gm31223	-1.99387	0.837843	41.3245	1.28945e-10	1.03986e-09
Gm40860	-1.94657	3.11343	104.223	1.80799e-24	3.98802e-23
Adcy8	-1.94509	3.73905	216.848	4.40586e-49	2.77197e-47
Gm35247	-1.94477	2.27388	47.3603	5.90665e-12	5.38021e-11
Slco4a1	-1.9442	5.61179	125.815	3.37557e-29	9.66088e-28
8030442B05Rik	-1.94217	2.82196	98.8059	2.78506e-23	5.74386e-22
Adtrp	-1.94016	1.35839	46.7777	7.95144e-12	7.16398e-11
LOC118567482	-1.93094	0.28592	19.008	1.30173e-05	5.49395e-05
Gm11655	-1.92815	-0.225305	18.1566	2.03467e-05	8.2984e-05
Gm43837	-1.92805	-0.0757754	17.784	2.47459e-05	9.94035e-05
LOC102636563	-1.92285	-0.159749	17.8965	2.33248e-05	9.44842e-05
Gm21761	-1.92165	0.404225	26.0079	3.40015e-07	1.81394e-06
Tcstv1	-1.92043	0.808625	32.8586	9.91092e-09	6.44491e-08
Gm38987	-1.91933	0.0914912	15.8891	6.71634e-05	0.000249934
P2rx1	-1.91666	3.48133	153.572	2.87189e-35	1.08687e-33
Serpinf1	-1.91575	4.83566	268.974	1.89869e-60	1.72631e-58
Gm13293	-1.91297	3.03742	58.322	2.22541e-14	2.55845e-13
Clec4a4	-1.90854	-0.348468	15.5494	8.03778e-05	0.000294258
Nrarp	-1.90315	3.50807	116.129	4.45334e-27	1.12169e-25
Gm38907	-1.90269	0.255939	24.8834	6.09029e-07	3.13254e-06
Gm40863	-1.89294	1.85195	39.4256	3.40806e-10	2.62488e-09
Nhs	-1.88328	1.48643	44.2711	2.85901e-11	2.45145e-10
Mmp15	-1.88254	2.01432	37.7897	7.87971e-10	5.78505e-09
Gm41556	-1.88013	0.859197	32.9336	9.53625e-09	6.21754e-08
Gm39348	-1.87932	2.04177	69.096	9.37837e-17	1.25983e-15
Gck	-1.8786	-0.175429	9.83462	0.00171258	0.00471752
LOC118568063	-1.87845	1.08375	27.5059	1.56614e-07	8.79572e-07
Gm11523	-1.86647	4.40423	175.527	4.59372e-40	2.08198e-38
Akap3	-1.86616	1.35888	30.9403	2.66087e-08	1.64155e-07
Avpr2	-1.86591	2.02577	55.7033	8.42777e-14	9.11948e-13
Siglece	-1.86567	5.96893	264.887	1.47664e-59	1.30285e-57
Col6a3	-1.86181	6.72377	112.399	2.92154e-26	7.03766e-25
Gm51695	-1.85925	0.320062	23.0315	1.59367e-06	7.74297e-06
Gm42364	-1.85805	0.206089	18.8714	1.39831e-05	5.87501e-05
Fam181b	-1.8578	0.551832	20.8863	4.87367e-06	2.21289e-05
Sema6d	-1.85247	4.34179	139.399	3.60278e-32	1.19115e-30
Pcnx2	-1.84529	3.93429	119.867	6.76399e-28	1.79144e-26
Ecscr	-1.84313	6.57157	400.224	4.92136e-89	8.064e-87
Gm33048	-1.83679	0.101859	17.9444	2.27453e-05	9.23121e-05
Gm30789	-1.83043	5.76242	280.961	4.63545e-63	4.43072e-61
Gm41071	-1.81385	3.99201	120.308	5.41564e-28	1.43944e-26
Mapk12	-1.80958	2.10755	60.0602	9.19983e-15	1.09393e-13
Gp9	-1.80414	3.92463	209.696	1.60042e-47	9.58391e-46
Ctnnd2	-1.79586	3.16304	62.1804	3.13394e-15	3.84294e-14
Rgs18	-1.79262	0.0778246	13.1203	0.000292113	0.000960673
Pecam1	-1.79168	5.00847	137.292	1.04082e-31	3.37384e-30
Gm8817	-1.79125	0.124468	19.2772	1.1305e-05	4.82175e-05
Pdzrn4	-1.79029	0.232159	17.6256	2.68949e-05	0.000107285
Tmem52	-1.78785	2.8865	57.1557	4.0264e-14	4.50395e-13
Gm21103	-1.78326	0.534431	27.6122	1.48238e-07	8.34732e-07
Gm36449	-1.7797	0.286086	21.3173	3.89209e-06	1.78955e-05
Lyve1	-1.77862	2.63688	51.2117	8.29232e-13	8.25964e-12
Gm32098	-1.77841	4.59496	203.732	3.20301e-46	1.85837e-44
Skint3	-1.77629	1.04395	35.7034	2.29756e-09	1.59865e-08
1700011L22Rik	-1.77157	0.03403	14.9464	0.000110609	0.000395704
Gm19688	-1.77124	-0.235227	15.0038	0.000107295	0.000384494
Slc39a12	-1.76976	3.87294	182.321	1.50906e-41	7.28208e-40
Gm13778	-1.76722	2.90216	89.2705	3.44349e-21	6.11989e-20
Mboat1	-1.744	2.75707	88.3976	5.35346e-21	9.3582e-20
Clec4a2	-1.74374	5.16551	236.101	2.78564e-53	2.02618e-51
Pnpla3	-1.74315	1.06533	27.6958	1.41969e-07	8.01246e-07
Gm39624	-1.74223	1.67716	33.0547	8.96036e-09	5.86257e-08
Rnase10	-1.7384	0.232795	16.6081	4.59537e-05	0.00017683
Slc26a11	-1.7369	3.40974	120.594	4.68829e-28	1.25732e-26
Il1bos	-1.73423	0.980406	22.1755	2.48826e-06	1.17673e-05
Phf24	-1.73129	2.18614	26.5715	2.53967e-07	1.37405e-06
Trp53cor1	-1.72399	2.13615	58.9587	1.61016e-14	1.87279e-13
Slc36a2	-1.72086	2.17822	51.7812	6.20428e-13	6.23817e-12
Gm35999	-1.72017	2.11148	32.6742	1.08973e-08	7.04639e-08
Gm32605	-1.71217	4.0822	77.6978	1.20078e-18	1.83263e-17
Gm36365	-1.71117	6.88956	266.663	6.05608e-60	5.37513e-58
Efcab6	-1.70181	1.16116	26.0609	3.30816e-07	1.76803e-06
Bcat1	-1.70156	0.39955	18.206	1.98251e-05	8.10339e-05
LOC118568037	-1.69854	2.95191	93.6067	3.84887e-22	7.32021e-21
Rasgrp4	-1.69221	4.85507	261.73	7.20216e-59	6.20759e-57
Gm21358	-1.68506	1.1385	33.0447	9.00656e-09	5.89021e-08
Gm7033	-1.68267	2.42497	42.6754	6.46198e-11	5.37993e-10
Gm6749	-1.67695	1.7121	26.7416	2.32559e-07	1.2686e-06
Gm30604	-1.67318	0.118624	16.9688	3.80001e-05	0.000148175
LOC118568068	-1.67186	2.07182	42.0295	8.99053e-11	7.38204e-10
Slc13a3	-1.67098	4.29982	123.573	1.04453e-28	2.8896e-27
Gimap9	-1.66931	2.6038	67.142	2.52642e-16	3.29872e-15
Ltb	-1.66717	2.84316	89.172	3.61941e-21	6.42488e-20
Dcaf12l1	-1.6659	-0.3001	11.5724	0.000669369	0.00203776
Cass4	-1.66557	4.1453	159.062	1.81354e-36	7.32837e-35
Gm31482	-1.6654	1.21335	37.6586	8.42745e-10	6.16593e-09
Ltb4r1	-1.66534	0.47574	18.4256	1.76666e-05	7.30472e-05
LOC118567790	-1.65711	1.54938	33.7126	6.38863e-09	4.24892e-08
Gm32017	-1.65506	-0.249919	13.1011	0.000295129	0.000968262
Pdlim4	-1.65331	5.37827	314.121	2.76386e-70	3.14594e-68
Afm	-1.65246	1.88447	34.539	4.17798e-09	2.83172e-08
Gm19689	-1.64705	0.673467	25.7048	3.97835e-07	2.10061e-06
Gm31095	-1.64692	-0.160984	9.35956	0.00221826	0.00596934
LOC102631992	-1.64298	5.45061	115.414	6.38791e-27	1.60084e-25
Gpr150	-1.64221	1.20003	34.4739	4.3201e-09	2.91876e-08
Gm23369	-1.64077	-0.281135	13.5869	0.000227776	0.000764775
Vsnl1	-1.6343	-0.18741	11.42	0.000726572	0.00219044
Gm36003	-1.63282	2.2771	38.3466	5.92315e-10	4.42707e-09
Tbx19	-1.63103	0.502001	11.0649	0.000879791	0.00260186
LOC118568655	-1.62366	4.61548	168.254	1.78061e-38	7.6295e-37
Mtss1	-1.62331	5.81513	338.202	1.57209e-75	2.05627e-73
Ggta1	-1.62293	6.72463	303.167	6.72641e-68	7.11329e-66
Gm27008	-1.62007	3.02796	68.3212	1.3892e-16	1.8528e-15
Gm12977	-1.61207	1.55262	30.5054	3.32942e-08	2.02798e-07
F630028O10Rik	-1.61008	0.817778	20.0772	7.43788e-06	3.2735e-05
Fam72a	-1.60969	4.77015	173.168	1.50443e-39	6.67635e-38
Upk1b	-1.60904	7.01985	235.842	3.17301e-53	2.29673e-51
Gm20045	-1.6002	2.94687	44.7546	2.23343e-11	1.93461e-10
Gm40773	-1.59779	-0.126297	15.6604	7.57959e-05	0.000279267
Gm36778	-1.59742	1.73588	35.809	2.1764e-09	1.5193e-08
Klk9	-1.59452	1.56781	29.7569	4.89774e-08	2.92004e-07
Prkca	-1.59351	5.81762	310.264	1.9131e-69	2.09752e-67
Angptl7	-1.59247	3.73378	115.804	5.24674e-27	1.31707e-25
Dok3	-1.5778	5.87576	198.065	5.52218e-45	3.01616e-43
Kng2	-1.57554	0.76374	18.3954	1.79489e-05	7.4117e-05
Gm15523	-1.56809	3.55305	103.258	2.94152e-24	6.37515e-23
Sostdc1	-1.56683	1.2915	13.778	0.000205732	0.000697516
Fam110a	-1.5628	5.35756	241.742	1.63998e-54	1.24764e-52
Qprt	-1.5625	1.99937	47.8619	4.57332e-12	4.21724e-11
LOC118568498	-1.56241	4.00225	119.599	7.74373e-28	2.04005e-26
Adra2a	-1.56058	1.4282	16.4321	5.04232e-05	0.000192538
Mgl2	-1.55873	3.44051	57.9404	2.70184e-14	3.07535e-13
Lst1	-1.55191	4.48274	223.544	1.52516e-50	9.97441e-49
Ada	-1.55144	1.29967	25.4058	4.64512e-07	2.42519e-06
Vstm4	-1.5503	0.40312	17.9782	2.23445e-05	9.07597e-05
Kcnk12	-1.5458	4.80338	172.169	2.48551e-39	1.09004e-37
Gm41425	-1.54389	0.192805	16.1022	6.00142e-05	0.000225352
Gm46116	-1.54326	4.88517	149.299	2.46712e-34	8.99444e-33
Napsa	-1.54205	1.09856	17.9293	2.29265e-05	9.2997e-05
Gm32992	-1.54186	0.928905	23.8472	1.04294e-06	5.2063e-06
Gm30327	-1.53979	1.03212	19.7748	8.71255e-06	3.79751e-05
Pkd2l2	-1.53931	1.05601	24.9748	5.80851e-07	2.99691e-06
Gm35828	-1.53925	4.32971	113.58	1.61075e-26	3.95031e-25
Cd300ld4	-1.53819	3.6802	67.9304	1.69367e-16	2.24284e-15
Abcg3	-1.53806	3.82219	95.6929	1.34158e-22	2.62869e-21
2310047D07Rik	-1.53695	3.2555	63.852	1.34128e-15	1.67925e-14
D930028M14Rik	-1.53431	1.24003	29.6945	5.05782e-08	3.01307e-07
Gm52528	-1.52871	0.632893	19.7614	8.77383e-06	3.82087e-05
Ly6g6e	-1.52696	0.690578	23.231	1.43662e-06	7.03034e-06
Gm52866	-1.52694	1.84576	36.6778	1.39355e-09	9.93747e-09
Tslp	-1.52582	0.760732	14.8215	0.000118179	0.000419762
Gm52877	-1.51603	1.42564	34.9031	3.46534e-09	2.36917e-08
Gm42043	-1.51522	2.07664	44.8086	2.17263e-11	1.88459e-10
Gm52024	-1.51398	0.0197121	14.6762	0.000127651	0.000451363
Chst8	-1.51001	4.56502	143.878	3.77707e-33	1.31897e-31
Mymk	-1.50828	3.73701	93.8956	3.32611e-22	6.38296e-21
Gm36266	-1.50266	2.71734	73.3557	1.0827e-17	1.54265e-16
Gm35866	-1.50122	1.75962	41.2887	1.31324e-10	1.0579e-09
Rnf152	-1.49991	-0.0866227	7.80791	0.0052018	0.0126863
LOC115490435	-1.49882	1.14098	23.6753	1.14039e-06	5.65868e-06
Kcng2	-1.49205	0.343634	15.6868	7.47421e-05	0.000275725
Cdhr4	-1.48979	1.91776	32.7265	1.06083e-08	6.86848e-08
Sgsh	-1.48687	4.55822	131.62	1.81214e-30	5.49203e-29
Ear2	-1.48622	0.587932	10.1446	0.00144728	0.00406334
Filip1l	-1.4836	5.73811	211.28	7.22091e-48	4.37687e-46
Gm32006	-1.4831	3.91512	58.7804	1.76291e-14	2.04248e-13
Irf4	-1.48264	3.3733	52.8196	3.6564e-13	3.73941e-12
Gm41308	-1.4801	1.77132	37.0054	1.17803e-09	8.46943e-09
Slc40a1	-1.47857	7.27672	311.333	1.11909e-69	1.23605e-67
Gm41598	-1.47321	3.70831	86.2082	1.61957e-20	2.7505e-19
Gm33699	-1.47308	3.12966	96.8283	7.5609e-23	1.50521e-21
Ccn1	-1.47181	1.01559	21.1098	4.33702e-06	1.9819e-05
Tgm2	-1.47178	6.63253	177.662	1.5704e-40	7.27213e-39
Gm42074	-1.46928	0.160432	15.6917	7.45517e-05	0.00027509
Gadl1	-1.46901	1.81417	39.6676	3.01085e-10	2.33219e-09
Gm36462	-1.46761	0.977838	21.6582	3.25806e-06	1.5172e-05
Snph	-1.46541	4.3736	68.2053	1.47329e-16	1.96145e-15
Gm15774	-1.46362	3.09769	46.1097	1.11811e-11	9.93572e-11
Gimap5	-1.46319	1.03801	21.7632	3.08458e-06	1.44182e-05
Gfra2	-1.46277	-0.452635	5.97384	0.0145196	0.0315692
Gpr132	-1.46263	1.31699	26.9982	2.03642e-07	1.12463e-06
Gm34105	-1.45979	-0.272561	11.8982	0.000561883	0.00173462
Ildr1	-1.45971	2.6616	43.7171	3.79441e-11	3.21834e-10
Trim16	-1.45606	1.2165	26.7771	2.28324e-07	1.248e-06
3300005D01Rik	-1.45539	-0.0294169	11.6431	0.000644409	0.00196619
Clec4a3	-1.45356	5.4485	165.603	6.75384e-38	2.82091e-36
Gimap6	-1.45212	4.35676	118.29	1.49778e-27	3.86391e-26
Gm3052	-1.44947	3.57994	82.425	1.09758e-19	1.78863e-18
Cracdl	-1.4491	0.791384	17.3025	3.1877e-05	0.000125745
Grap	-1.44606	5.57658	247.254	1.03088e-55	8.13306e-54
Ccl24	-1.44413	1.69781	28.3989	9.87219e-08	5.67261e-07
Scn11a	-1.4417	0.0199799	12.423	0.000424079	0.00134656
Gm39884	-1.44165	2.14471	31.3551	2.14897e-08	1.34344e-07
Gm15612	-1.43805	-0.0628931	11.0371	0.000893062	0.00263953
Gm13479	-1.4286	4.54229	187.404	1.17224e-42	5.86552e-41
Stab1	-1.42811	9.88373	106.803	4.9168e-25	1.1159e-23
Gm47112	-1.42746	-0.252464	10.3661	0.0012835	0.00364955
Gm52117	-1.42351	-0.0837203	10.3542	0.00129178	0.00366959
Steap1	-1.42179	-0.00415867	7.08514	0.0077726	0.0181657
Gm35117	-1.41885	1.50802	23.4642	1.2726e-06	6.27297e-06
Myo18b	-1.41867	6.37474	170.98	4.51982e-39	1.96487e-37
Cd209b	-1.41376	1.30594	12.2572	0.000463463	0.00145926
Cacnb2	-1.41352	3.42072	51.24	8.17373e-13	8.14696e-12
Shoc1	-1.41296	0.680371	13.4222	0.000248661	0.00082895
Nhsl2	-1.41261	4.96732	78.3905	8.45577e-19	1.30118e-17
Sfmbt2	-1.41118	2.32743	33.7607	6.2324e-09	4.14687e-08
Kcnd1	-1.41088	6.14118	135.938	2.05881e-31	6.50402e-30
LOC118567681	-1.41031	-0.220027	8.86213	0.00291148	0.00759501
Gm40128	-1.40949	-0.0199795	9.51843	0.00203419	0.00551888
Gm28874	-1.40821	0.570257	15.5527	8.02365e-05	0.000293911
Ager	-1.40631	1.56926	30.924	2.68333e-08	1.65335e-07
Gm10790	-1.40593	6.97618	218.903	1.56943e-49	1.00008e-47
Nlrc4	-1.40482	0.902907	16.9167	3.90576e-05	0.00015198
LOC118568587	-1.40431	1.81542	26.5782	2.53081e-07	1.36976e-06
Enpp5	-1.40344	3.12348	42.1659	8.38503e-11	6.90388e-10
Gm41055	-1.40336	-0.220125	11.1928	0.000821149	0.00244443
Lrrc70	-1.40314	2.32254	48.846	2.76868e-12	2.61124e-11
Gm30411	-1.40142	-0.0636285	7.98987	0.00470397	0.0115929
Dpp4	-1.40127	0.378042	12.5267	0.00040118	0.00127957
Itga9	-1.3997	6.4327	163.14	2.33111e-37	9.60198e-36
S100a10	-1.39898	2.0118	31.3144	2.19441e-08	1.37022e-07
Fads6	-1.39835	3.75176	87.1671	9.97281e-21	1.71714e-19
Gm15575	-1.39809	0.444121	14.0345	0.000179485	0.000615382
Scube1	-1.39522	3.28979	89.8892	2.51875e-21	4.53041e-20
Spats2l	-1.39419	-0.153731	11.2233	0.000807772	0.00240718
Slc5a5	-1.39368	1.07658	19.2566	1.14275e-05	4.86984e-05
Tlr5	-1.39292	5.01611	89.8838	2.52571e-21	4.53746e-20
Gm572	-1.39228	2.04908	27.817	1.33351e-07	7.53751e-07
C1rl	-1.39082	2.98727	60.4581	7.51598e-15	9.00167e-14
Tppp	-1.3884	6.2771	142.23	8.66287e-33	2.9546e-31
Gm15912	-1.38773	1.46666	31.168	2.36638e-08	1.47082e-07
Lbp	-1.38721	1.39572	10.5274	0.00117621	0.00336851
Col8a1	-1.3867	1.62415	12.5483	0.000396561	0.00126592
Ptpn14	-1.38552	2.06488	19.0507	1.2729e-05	5.38142e-05
Bnc2	-1.38505	1.34206	25.6006	4.19904e-07	2.21087e-06
Tmem262	-1.38502	-0.173863	9.39457	0.0021763	0.00587132
Spata45	-1.38369	0.347091	12.9149	0.000325981	0.00105809
LOC118567423	-1.38014	0.244609	14.1456	0.000169195	0.000582648
Ecrg4	-1.37875	1.91102	10.8691	0.000977809	0.00286278
BC035044	-1.37746	5.51368	193.487	5.51146e-44	2.91423e-42
Adrb2	-1.37629	6.9386	174.264	8.66661e-40	3.88071e-38
Gm41611	-1.37527	2.87383	45.4493	1.56641e-11	1.37554e-10
Cgref1	-1.37462	0.969913	19.2799	1.12886e-05	4.81613e-05
2500004C02Rik	-1.37178	2.61687	30.5953	3.17859e-08	1.94166e-07
Acy1	-1.37067	4.24985	135.471	2.60441e-31	8.17566e-30
Kcp	-1.3692	2.82536	59.5605	1.1859e-14	1.39566e-13
Kmo	-1.36911	0.223278	13.2174	0.000277354	0.000916814
LOC102639987	-1.36624	0.623279	16.347	5.27394e-05	0.000200509
Htr2c	-1.36469	1.92674	9.48675	0.00206961	0.00560376
Gm41569	-1.36375	1.29962	21.1219	4.30977e-06	1.97065e-05
Slc2a12	-1.35557	1.44396	8.82519	0.002971	0.00773597
E330020D12Rik	-1.35249	3.5254	71.1684	3.27991e-17	4.5622e-16
Tgm1	-1.34971	1.37375	27.8908	1.28359e-07	7.27467e-07
Cfhr2	-1.34943	0.490077	12.4672	0.000414159	0.00131843
Gm15246	-1.34853	1.85587	30.8646	2.76678e-08	1.70126e-07
Ttr	-1.34765	8.43867	12.7274	0.00036033	0.00115895
Gm46626	-1.34742	1.47427	25.7285	3.92985e-07	2.07868e-06
LOC108167736	-1.34635	4.85709	54.0313	1.97324e-13	2.06187e-12
Pde1b	-1.34542	6.85055	107.031	4.38221e-25	9.97606e-24
Mrvi1	-1.34371	0.775823	5.94395	0.0147679	0.0320157
Trp53i11	-1.34248	5.01674	129.978	4.14322e-30	1.24556e-28
Gm10615	-1.34152	1.09463	16.3674	5.21752e-05	0.000198668
Gm32317	-1.3404	2.54647	42.0258	9.00792e-11	7.38818e-10
Patl2	-1.33869	0.337559	10.2745	0.00134878	0.00381263
Gm51701	-1.3385	4.17237	87.9909	6.57565e-21	1.14277e-19
Actn1	-1.33776	5.00599	215.485	8.73697e-49	5.42821e-47
Gm41662	-1.3371	0.792084	20.3437	6.47052e-06	2.87148e-05
Cd163	-1.3342	4.03179	41.8358	9.92703e-11	8.10191e-10
Tbc1d10c	-1.33187	1.31045	21.6384	3.292e-06	1.5311e-05
Gm30639	-1.33084	-0.132409	8.81565	0.00298658	0.00776645
Nr6a1os	-1.32987	2.78185	47.6598	5.06983e-12	4.65494e-11
Alb	-1.32768	0.144496	6.71233	0.00957483	0.021817
Ggt5	-1.32681	5.79235	169.518	9.42999e-39	4.07567e-37
Lrba	-1.32643	7.22885	201.896	8.05655e-46	4.56537e-44
Gm4925	-1.32319	-0.272881	8.66461	0.0032445	0.00835989
Pde10a	-1.32141	1.6703	20.2316	6.86088e-06	3.03388e-05
Gm35243	-1.31959	2.46838	37.3454	9.89544e-10	7.16963e-09
Setbp1	-1.31853	2.82908	35.7679	2.22285e-09	1.54956e-08
Smpd3	-1.31835	0.450927	13.9928	0.000183512	0.000627317
Gbp7	-1.31776	5.5546	100.074	1.4678e-23	3.07824e-22
Ralgps1	-1.31636	5.84194	203.184	4.2171e-46	2.43725e-44
Gm40841	-1.31617	7.1163	113.861	1.39766e-26	3.43903e-25
Ncaph	-1.31614	4.09709	109.766	1.10257e-25	2.57284e-24
Gimap1	-1.31516	3.92811	119.674	7.45478e-28	1.9674e-26
Arhgap4	-1.31494	8.19586	128.035	1.10296e-29	3.2311e-28
Cfap74	-1.31493	6.85405	107.289	3.84798e-25	8.77327e-24
Gm7694	-1.31484	4.80939	125.367	4.23051e-29	1.19926e-27
Cbr2	-1.3145	3.20436	37.2411	1.04393e-09	7.5417e-09
Bmp2	-1.31098	1.04397	23.1468	1.50097e-06	7.31882e-06
LOC118568295	-1.30839	0.926997	18.6669	1.55662e-05	6.50343e-05
Fbln1	-1.30792	0.768456	12.7124	0.000363235	0.00116703
Gm41750	-1.30654	2.07893	39.2844	3.66354e-10	2.80859e-09
Clec4a1	-1.30155	2.78192	54.0364	1.9681e-13	2.05795e-12
Gm39439	-1.30106	0.674781	13.8634	0.000196591	0.000667739
Slc12a5	-1.30048	1.64471	18.0063	2.20178e-05	8.95547e-05
Pnp2	-1.29918	1.98358	32.2699	1.34178e-08	8.58313e-08
Gm34336	-1.29896	0.119548	7.09872	0.00771391	0.0180342
Adgre4	-1.29826	1.63691	15.3017	9.16332e-05	0.000331935
Rgs4	-1.29758	1.23094	7.74087	0.00539848	0.0131252
Lpar6	-1.29698	7.53125	183.162	9.88601e-42	4.81733e-40
Gm47754	-1.2934	2.14145	23.7329	1.10676e-06	5.50095e-06
Sec16b	-1.29277	3.12704	33.7794	6.17282e-09	4.10906e-08
Gm13067	-1.29277	1.54988	22.2454	2.39936e-06	1.13794e-05
Cdh23	-1.29009	6.00887	151.63	7.63397e-35	2.81062e-33
Gm29975	-1.28796	0.436341	11.687	0.000629389	0.00192628
Gm51544	-1.28692	1.11184	18.8714	1.39832e-05	5.87501e-05
Gm39673	-1.28621	6.10184	100.544	1.15804e-23	2.43204e-22
Gm15707	-1.28447	0.683064	14.235	0.000161337	0.000557648
Gm33434	-1.28428	0.444109	13.8266	0.00020048	0.000680172
Plvap	-1.28391	1.53835	20.0541	7.528e-06	3.31023e-05
Gm40096	-1.2833	2.63651	37.5855	8.74907e-10	6.38246e-09
Tnfrsf25	-1.28104	0.485848	14.434	0.000145159	0.000507854
Gm46816	-1.28031	3.3517	57.3492	3.64913e-14	4.10657e-13
Strip2	-1.2762	1.89201	9.37296	0.0022021	0.00593449
Flt3	-1.27581	2.01678	27.4252	1.63291e-07	9.14664e-07
Ak5	-1.27275	-0.197169	7.01951	0.00806263	0.0187466
Fbxw10	-1.26624	2.48666	43.8772	3.49637e-11	2.97891e-10
4930521O11Rik	-1.26592	-0.251215	7.59854	0.00584156	0.0140671
Foxred2	-1.26017	1.26295	15.4713	8.37666e-05	0.000305763
Iqcd	-1.25216	0.151583	9.59407	0.00195206	0.00531057
Gm30122	-1.25209	0.731652	12.4114	0.000426731	0.00135296
Fgd2	-1.25196	9.29188	143.207	5.29656e-33	1.82817e-31
Drc7	-1.247	1.21147	6.82422	0.008993	0.0206109
Mmp11	-1.24591	2.05518	31.6235	1.87148e-08	1.17895e-07
Tet1	-1.24357	3.6715	61.3134	4.8675e-15	5.91037e-14
Angptl2	-1.24309	0.539105	8.01731	0.00463323	0.0114343
Clcf1	-1.24035	5.81476	148.143	4.41458e-34	1.59e-32
Chst7	-1.23776	5.73665	180.163	4.46546e-41	2.12052e-39
Gm14834	-1.23711	-0.0775383	8.89775	0.00285522	0.00746523
Xlr4a	-1.23449	1.76275	7.18059	0.00736966	0.017319
Gm26641	-1.23139	-0.140877	6.68792	0.00970682	0.0220941
Gm30013	-1.22884	0.438343	12.9939	0.00031251	0.00101877
LOC118567660	-1.22489	0.522595	10.2298	0.00138189	0.0038944
Cebpd	-1.22338	5.79239	216.821	4.46549e-49	2.79769e-47
Gm21992	-1.22314	0.0253344	8.92467	0.00281344	0.00736632
Plbd1	-1.22287	2.77005	30.1286	4.04315e-08	2.4375e-07
LOC115487911	-1.22009	-0.0222858	6.53683	0.0105664	0.0238179
4933431G14Rik	-1.21867	1.86759	12.9456	0.00032067	0.0010424
Cd209f	-1.21707	3.05991	18.7132	1.51926e-05	6.35626e-05
Tmem119	-1.21664	10.937	129.76	4.62357e-30	1.3816e-28
Mpi	-1.21579	5.63445	175.539	4.56494e-40	2.07524e-38
Frmpd4	-1.21489	1.18793	18.4522	1.74222e-05	7.21617e-05
Camk2n1	-1.21469	6.22966	62.9207	2.15196e-15	2.66289e-14
Dnase1l2	-1.21397	2.76213	31.5009	1.99352e-08	1.25107e-07
Kl	-1.21315	4.02461	11.8742	0.000569169	0.00175639
Dlc1	-1.21225	3.60571	48.8763	2.72629e-12	2.57459e-11
Slc43a1	-1.21009	1.48734	20.5179	5.90771e-06	2.64534e-05
Acvr2b	-1.20934	6.11185	108.516	2.07144e-25	4.79616e-24
Eps8	-1.2072	2.84574	54.3937	1.6409e-13	1.72915e-12
Gm31726	-1.20665	1.44195	16.8481	4.0494e-05	0.000157037
Gm38565	-1.20653	1.32715	15.5235	8.14843e-05	0.000298162
Nup210l	-1.20648	2.25433	25.5967	4.20757e-07	2.2138e-06
Plxna1	-1.20255	3.63919	56.9368	4.5004e-14	5.00787e-13
Gm13710	-1.20225	1.37282	7.02155	0.00805345	0.0187282
Rtn1	-1.20188	6.35704	202.06	7.41863e-46	4.22211e-44
Ms4a6b	-1.2018	5.46212	132.241	1.32519e-30	4.02441e-29
Gm24105	-1.20027	-0.0642366	8.58269	0.00339373	0.00870979
Gm13291	-1.19955	2.87915	24.0879	9.20343e-07	4.6144e-06
Gm4325	-1.19927	-0.206675	5.22231	0.0222989	0.045843
Ms4a4a	-1.19683	2.0379	18.1614	2.02947e-05	8.27944e-05
Casp12	-1.19571	1.57254	18.2963	1.89079e-05	7.7647e-05
Lgals4	-1.19421	2.40977	33.1701	8.44391e-09	5.53681e-08
A2m	-1.19092	1.61498	5.42968	0.0197973	0.0413095
Vipr1	-1.19075	4.25958	103.623	2.44727e-24	5.3272e-23
Phtf1os	-1.19069	0.267784	8.94764	0.00277829	0.00728635
Unc5cl	-1.18946	1.20545	16.8958	3.94896e-05	0.000153501
Gpd1	-1.18675	3.41568	48.4581	3.37418e-12	3.15241e-11
Zfp334	-1.18671	2.18336	32.1765	1.40787e-08	8.98659e-08
Abhd15	-1.18564	6.19792	108.128	2.51967e-25	5.79797e-24
Clec12a	-1.18442	2.65587	29.3649	5.99546e-08	3.53074e-07
LOC118567509	-1.18045	0.707728	14.1537	0.000168467	0.000580275
Gm35853	-1.18029	1.14267	20.2165	6.91529e-06	3.05522e-05
Ttc9	-1.17643	4.1243	87.0854	1.03935e-20	1.78545e-19
Gm7997	-1.17643	1.32738	13.3642	0.000256473	0.000852491
Cryba4	-1.17622	5.06846	148.747	3.25693e-34	1.18161e-32
LOC118568020	-1.17564	0.146205	8.73045	0.00312939	0.0080997
Gm14230	-1.174	2.31359	31.2626	2.25384e-08	1.40497e-07
Ivns1abp	-1.17342	10.8873	142.016	9.64694e-33	3.27666e-31
Xlr4c	-1.17239	0.754752	5.73883	0.0165938	0.0354877
Rxfp1	-1.17124	2.79336	31.6808	1.81709e-08	1.14808e-07
Lypd6	-1.17121	3.20524	46.8506	7.66092e-12	6.91896e-11
Snta1	-1.17054	6.33073	191.664	1.37794e-43	7.20926e-42
Grtp1	-1.17032	0.652058	8.19968	0.00418978	0.0104943
Slc15a2	-1.16944	3.40238	6.09559	0.013552	0.0296992
Tsc22d3	-1.16822	5.41496	63.0578	2.00729e-15	2.49422e-14
Hdgfl3	-1.16787	4.09193	60.7885	6.35467e-15	7.66002e-14
Gm34589	-1.1673	4.47009	40.2673	2.21489e-10	1.74373e-09
Tmem181c-ps	-1.16673	1.93365	27.8883	1.28527e-07	7.27865e-07
Gm35060	-1.16646	2.40608	27.3807	1.67092e-07	9.34551e-07
Gm33864	-1.16342	3.0124	43.7326	3.76455e-11	3.19665e-10
Lin7b	-1.15984	0.853944	14.8119	0.000118786	0.00042159
Gm51871	-1.15921	1.47837	18.5162	1.68469e-05	6.9954e-05
Phyhd1	-1.15691	8.93464	153.453	3.05054e-35	1.15156e-33
Gm52743	-1.15593	3.14507	33.2948	7.91948e-09	5.21357e-08
Tex101	-1.1547	0.873895	14.8328	0.000117477	0.000417767
Slc25a37	-1.1545	7.63522	155.428	1.12896e-35	4.39526e-34
Xlr4b	-1.15433	2.51174	15.3024	9.16011e-05	0.000331923
Klra2	-1.15398	1.73868	20.5088	5.9359e-06	2.65637e-05
Klf7	-1.15371	5.79892	89.4336	3.17099e-21	5.64232e-20
Gm6610	-1.15238	1.53008	14.8232	0.000118075	0.00041955
Gm52013	-1.15234	2.32388	26.3569	2.83799e-07	1.5277e-06
Slc1a4	-1.15128	3.34401	30.6907	3.02612e-08	1.85308e-07
Gabbr1	-1.15095	7.24136	106.701	5.17644e-25	1.16948e-23
Nlrp1b	-1.15048	7.31606	91.5612	1.08191e-21	1.98675e-20
B430209F14Rik	-1.14956	2.15394	28.9968	7.24963e-08	4.21933e-07
Armc3	-1.14932	1.8018	20.4502	6.12021e-06	2.73147e-05
Gprasp2	-1.1485	5.06661	133.468	7.14371e-31	2.19629e-29
Gdf9	-1.14753	2.5977	34.2252	4.90889e-09	3.29714e-08
Galnt16	-1.14664	2.96677	44.0389	3.21912e-11	2.74915e-10
Kcnab1	-1.1459	0.243643	7.87433	0.00501414	0.0122829
Podxl2	-1.14297	1.19674	14.7812	0.000120734	0.000428125
Fgfbp3	-1.14272	1.82879	12.9538	0.000319269	0.00103876
BC051537	-1.14232	0.786722	11.5592	0.000674159	0.00205193
LOC118567734	-1.14208	3.80998	51.0331	9.08201e-13	9.01011e-12
Lfng	-1.14201	6.11127	111.06	5.7395e-26	1.3715e-24
Gm4598	-1.14162	0.0833443	8.99208	0.00271152	0.00713078
Smpdl3b	-1.14072	3.40476	50.6172	1.12255e-12	1.10484e-11
Gm15850	-1.13935	1.49433	17.4629	2.92972e-05	0.000116307
Cnn2	-1.13875	4.01892	72.5225	1.65136e-17	2.31859e-16
Khdrbs3	-1.13581	4.9189	110.663	7.01328e-26	1.65729e-24
Cmah	-1.13576	1.64247	14.0075	0.000182086	0.000623012
Dact3	-1.13573	3.04341	37.9391	7.29895e-10	5.38519e-09
Snap25	-1.13563	1.72709	7.34121	0.00673913	0.0159782
Tbx6	-1.13486	3.91086	38.6472	5.07759e-10	3.82577e-09
Atp2b3	-1.13311	3.16432	12.0333	0.00052259	0.0016251
Qrich2	-1.12914	0.459119	10.9699	0.000926033	0.0027251
Gm34836	-1.12846	5.49931	124.954	5.20807e-29	1.47358e-27
Klhl23	-1.12719	4.49421	115.965	4.83763e-27	1.21642e-25
Ccr5	-1.1271	8.94475	138.055	7.08734e-32	2.32262e-30
F5	-1.12568	2.81141	12.6171	0.000382245	0.00122231
Mmp23	-1.12315	2.85635	30.4607	3.40706e-08	2.07104e-07
Olfr1029	-1.12102	0.355343	9.77657	0.0017675	0.00485183
1600010M07Rik	-1.12064	1.29641	17.7321	2.54293e-05	0.000102012
Mdfi	-1.11929	4.71052	122.144	2.14647e-28	5.82988e-27
Slc22a4	-1.11706	0.581656	9.50296	0.00205141	0.00556156
Cldn2	-1.11697	1.30179	7.31133	0.00685212	0.0162126
Cav1	-1.11687	1.90162	7.64937	0.00567921	0.013717
Gm38843	-1.11685	3.2203	34.5284	4.20067e-09	2.84451e-08
Srl	-1.11609	3.46048	57.2479	3.84199e-14	4.31061e-13
Cep68	-1.11582	7.00417	133.589	6.72026e-31	2.07037e-29
Gm31560	-1.11572	-0.254419	5.31653	0.0211241	0.0436745
Pcdhgb8	-1.11541	1.60709	17.6742	2.62158e-05	0.000104828
Fbxo24	-1.11412	1.58187	19.4411	1.03752e-05	4.46479e-05
Ankrd24	-1.11352	4.30442	72.817	1.42247e-17	2.00667e-16
Gm51697	-1.11306	0.288119	8.50568	0.0035404	0.00903182
Gm2956	-1.11277	3.1087	50.8536	9.9518e-13	9.83375e-12
Doc2g	-1.11195	1.94484	18.2686	1.91841e-05	7.86946e-05
Maf	-1.11187	8.87436	160.902	7.18802e-37	2.92045e-35
Mir17hg	-1.11038	2.97363	35.4515	2.61477e-09	1.81007e-08
Unc5a	-1.10976	2.13906	28.1818	1.10441e-07	6.29984e-07
Cpsf4l	-1.10961	1.74513	14.3658	0.000150509	0.000524356
Tstd1	-1.10826	2.96956	45.5637	1.47753e-11	1.29979e-10
Pde2a	-1.10586	7.23174	70.9256	3.70962e-17	5.13594e-16
Ano7	-1.10516	4.2566	49.6882	1.8023e-12	1.74055e-11
Zfp385c	-1.10514	2.11126	20.6422	5.53611e-06	2.49317e-05
Tmem72	-1.10382	1.34106	6.38678	0.0114973	0.0256911
Srp54b	-1.10327	2.94585	9.87571	0.00167475	0.00462106
Gm31388	-1.1006	0.672621	10.9361	0.000943065	0.00277085
Gm34861	-1.09984	2.73768	29.1149	6.82107e-08	3.9839e-07
Gm20257	-1.09796	2.67892	29.4866	5.63048e-08	3.32763e-07
Gm14154	-1.09726	0.739086	13.6467	0.000220625	0.000742605
Cd46	-1.09701	2.44366	21.1186	4.31716e-06	1.97343e-05
Cd59a	-1.09616	0.704329	6.32151	0.0119282	0.0265266
Ttll3	-1.09596	5.5364	47.7423	4.86089e-12	4.46861e-11
Gm9054	-1.09411	0.218182	8.08629	0.00446013	0.0110602
Slc13a4	-1.09366	1.48405	9.69211	0.00185061	0.00505764
Efnb1	-1.09356	5.24493	140.576	1.99194e-32	6.65961e-31
Irs3	-1.09331	1.14121	14.2672	0.000158605	0.00054948
Mrc1	-1.09326	6.2561	35.5532	2.48178e-09	1.7216e-08
Cd209g	-1.0922	1.53093	8.94111	0.00278824	0.00730547
Gm21057	-1.09158	2.15016	24.6466	6.8867e-07	3.5155e-06
Nrm	-1.09035	5.41924	143.536	4.48714e-33	1.55962e-31
Gm35831	-1.08791	3.56917	35.8507	2.13032e-09	1.49131e-08
1700040D17Rik	-1.08606	0.161984	8.31605	0.00392963	0.00991617
Gm15232	-1.08485	1.85761	18.5986	1.61339e-05	6.72553e-05
Ncs1	-1.08443	4.33766	93.6879	3.69407e-22	7.04378e-21
Col27a1	-1.08376	8.64354	113.097	2.05456e-26	4.99763e-25
Gm38521	-1.08375	0.504218	7.7238	0.00544976	0.0132369
Gm26634	-1.08301	0.39657	8.38669	0.00377979	0.0095786
Igfbp2	-1.0822	3.14182	10.6018	0.00112978	0.00324964
Cd300c	-1.08205	-0.149937	5.48706	0.0191578	0.0401605
Zfp69	-1.08175	5.6626	61.2092	5.13223e-15	6.21663e-14
Zfr2	-1.08088	1.8342	17.0869	3.57082e-05	0.000139639
Treml1	-1.0795	2.6117	31.082	2.47353e-08	1.53231e-07
Ccr2	-1.07939	4.27509	70.5791	4.42178e-17	6.10492e-16
Tcf7l2	-1.07896	4.38748	119.789	7.03568e-28	1.86009e-26
Cdk5r1	-1.07764	6.62834	188.692	6.13603e-43	3.11205e-41
Sulf1	-1.07699	2.27331	6.36208	0.0116585	0.0260044
Mndal	-1.07654	2.74427	23.5892	1.19253e-06	5.89973e-06
Gm22573	-1.07196	-0.0666588	5.7227	0.0167469	0.0357449
Ptprk	-1.07164	0.634293	5.50977	0.0189106	0.0397372
Zfhx3	-1.07019	7.97115	98.544	3.17882e-23	6.50197e-22
P2ry12	-1.06967	11.3357	135.063	3.19847e-31	9.99841e-30
Ovgp1	-1.06882	0.898985	10.7727	0.00103006	0.00299809
Cfp	-1.06821	2.74501	33.9492	5.65691e-09	3.78592e-08
Fcrl1	-1.06777	5.33919	115.3	6.76652e-27	1.69288e-25
Ermap	-1.06494	3.36723	55.3018	1.03376e-13	1.10975e-12
Pdgfrb	-1.0641	1.65156	8.26392	0.00404407	0.010174
Gm7285	-1.06384	2.16194	19.2972	1.1187e-05	4.77744e-05
Pnp	-1.06366	7.05044	145.559	1.62053e-33	5.73959e-32
Magef1	-1.06309	3.82973	47.9033	4.47761e-12	4.1341e-11
Sigirr	-1.06247	0.316767	7.73957	0.00540236	0.0131325
Rac3	-1.06071	3.19568	45.1331	1.84089e-11	1.60336e-10
Zfp658	-1.05999	6.22455	134.325	4.63798e-31	1.43479e-29
Cd38	-1.05905	1.6364	14.7287	0.000124142	0.000439584
Mir7115	-1.05852	3.58341	20.8428	4.98574e-06	2.25965e-05
Etv1	-1.05826	4.79514	86.8015	1.19979e-20	2.05162e-19
6030468B19Rik	-1.05814	3.86091	35.392	2.69598e-09	1.86369e-08
Kcnip3	-1.05802	4.68414	44.4986	2.54537e-11	2.18881e-10
Rap1gap2	-1.05802	5.67849	147.119	7.39067e-34	2.64274e-32
F13a1	-1.0578	4.9063	24.8697	6.13373e-07	3.15162e-06
4833418N02Rik	-1.05775	2.1039	23.7543	1.09452e-06	5.44737e-06
Ccl7	-1.0565	1.47095	14.2561	0.000159541	0.000552338
Slc2a5	-1.05624	8.83884	140.501	2.06858e-32	6.90037e-31
5330438D12Rik	-1.05602	2.11225	15.4937	8.2783e-05	0.000302692
Atp1b1	-1.05586	3.073	8.87987	0.00288332	0.0075321
Myo1g	-1.0558	5.90174	126.186	2.8001e-29	8.07589e-28
Timd4	-1.05471	0.413319	7.0977	0.00771828	0.0180416
Snn	-1.0543	7.70911	178.177	1.21186e-40	5.6469e-39
Gm31386	-1.05218	0.204481	6.65481	0.00988887	0.0224707
Gm36851	-1.05162	2.24885	17.7743	2.48725e-05	9.98854e-05
Prkab1	-1.0512	6.73635	154.181	2.11442e-35	8.04289e-34
Csad	-1.05067	6.59778	122.972	1.41417e-28	3.87624e-27
Marchf10	-1.05021	2.38205	21.8013	3.02392e-06	1.41569e-05
Cspg4b	-1.0489	0.263414	5.64446	0.0175106	0.0371252
Slc16a9	-1.04855	1.89482	17.8348	2.4094e-05	9.69941e-05
Spns3	-1.04786	3.72767	54.6213	1.46141e-13	1.54766e-12
Efnb2	-1.04681	2.51683	21.61	3.34114e-06	1.55057e-05
Scamp5	-1.04649	8.25134	136.652	1.43671e-31	4.58731e-30
Asb2	-1.04628	6.30461	157.655	3.68162e-36	1.47969e-34
Myl2	-1.04606	3.01707	34.7589	3.73168e-09	2.54776e-08
3110056K07Rik	-1.04599	3.4619	30.1035	4.09585e-08	2.4676e-07
Gm33387	-1.04582	0.8746	9.93454	0.00162206	0.0044898
Gm36685	-1.04549	1.41164	17.0107	3.71706e-05	0.000144978
Olfml2b	-1.04423	5.17024	76.8796	1.81708e-18	2.73406e-17
Otulinl	-1.0436	8.41855	155.657	1.00625e-35	3.94846e-34
Eef2k	-1.0435	7.63722	112.491	2.78874e-26	6.73954e-25
Gm33100	-1.04339	0.78953	7.63869	0.00571292	0.0137863
Col11a2	-1.04274	2.82713	24.8358	6.24265e-07	3.20317e-06
Gm41665	-1.04254	0.238545	7.2123	0.00724056	0.0170559
Gm2921	-1.04114	0.294678	8.13658	0.00433811	0.0108007
Slc4a10	-1.04112	2.55304	9.4786	0.00207883	0.00562668
Gm39565	-1.03964	2.93872	38.3287	5.97764e-10	4.46556e-09
Txnip	-1.03963	8.64282	122.57	1.73167e-28	4.71184e-27
Myb	-1.03944	0.537768	9.49116	0.00206464	0.00559234
Slfn4	-1.03918	1.59718	7.31804	0.00682658	0.0161599
9330136K24Rik	-1.03587	0.461899	7.18435	0.00735424	0.0172855
Gm36417	-1.0356	0.185796	7.64262	0.00570051	0.0137608
Fam83g	-1.03525	2.04596	25.0015	5.72852e-07	2.95769e-06
Epn2	-1.03518	4.95461	120.409	5.14784e-28	1.37316e-26
Lamtor3-ps	-1.031	3.65674	32.4623	1.21527e-08	7.80064e-08
Nbeal2	-1.03069	7.33667	103.716	2.33521e-24	5.09814e-23
Btbd3	-1.02939	4.81217	77.2099	1.53723e-18	2.32471e-17
Osbpl6	-1.02916	1.66413	15.4688	8.38767e-05	0.000306035
Gm9157	-1.0272	0.709635	10.6369	0.00110853	0.00319593
Aqp1	-1.02701	1.5789	6.17735	0.0129396	0.0284996
Trim15	-1.02696	0.922893	11.6641	0.000637179	0.00194612
Gm33641	-1.0263	1.76041	17.9693	2.245e-05	9.11633e-05
Clec10a	-1.02615	3.22314	12.7829	0.0003498	0.00112881
LOC118567382	-1.02483	2.19074	14.3189	0.000154306	0.000536207
4930568A12Rik	-1.0247	0.970825	11.4372	0.000719876	0.00217333
Gm3264	-1.02326	4.46201	74.5707	5.85057e-18	8.45329e-17
4930581F22Rik	-1.02089	2.9748	32.9831	9.29631e-09	6.07438e-08
Adgrg1	-1.01924	9.55856	166.897	3.52293e-38	1.48812e-36
Clec4e	-1.01837	0.1593	6.59454	0.0102292	0.0231278
Inka1	-1.01784	5.31991	91.3685	1.19257e-21	2.17922e-20
Gm46162	-1.01726	8.08053	92.6275	6.31253e-22	1.18398e-20
Arid3b	-1.01604	6.21577	121.696	2.69039e-28	7.28065e-27
LOC118568309	-1.01596	3.05534	27.1263	1.90586e-07	1.05526e-06
Gm34849	-1.01596	0.787749	9.78752	0.001757	0.00482747
Gm39308	-1.01553	0.591946	9.13796	0.00250361	0.00664258
Zfp691	-1.01533	6.30651	143.362	4.89911e-33	1.69885e-31
Pcolce	-1.01523	2.70222	23.1789	1.4761e-06	7.20934e-06
Gm32849	-1.01328	5.60348	66.935	2.80602e-16	3.65101e-15
5830444B04Rik	-1.01266	3.53775	13.841	0.000198942	0.000675263
Hjurp	-1.01249	6.75901	125.596	3.76918e-29	1.07461e-27
Dapp1	-1.01028	6.7529	106.58	5.50362e-25	1.23964e-23
Unc79	-1.00905	1.91759	12.0503	0.000517844	0.00161168
Gm10384	-1.0087	4.14931	49.2874	2.21078e-12	2.11178e-11
Tll2	-1.00627	0.164868	8.18212	0.00423052	0.010577
Nsg2	-1.00621	1.73937	6.31481	0.0119734	0.0266152
Mkrn3	-1.0062	1.19639	9.26829	0.00233155	0.00623138
Ltc4s	-1.00527	7.48663	136.744	1.3721e-31	4.39041e-30
Sapcd1	-1.00505	0.761166	8.56487	0.00342711	0.00878336
Gm51749	-1.00418	-0.135108	6.46835	0.0109812	0.024645
LOC118568402	-1.00396	5.66564	71.7702	2.41781e-17	3.36935e-16
Tmc7	-1.00375	5.38803	103.746	2.3002e-24	5.02907e-23
Gm51644	-1.00266	3.04198	24.5488	7.24505e-07	3.6921e-06
Gm35816	-1.00243	2.09105	16.4935	4.8817e-05	0.000186883
Trmt10a	-1.00086	3.80992	42.918	5.70826e-11	4.77375e-10
Plxna4	-1.00029	6.62252	108.142	2.5018e-25	5.76573e-24
