# Supplementary material for: Chronic Intermittent Hypoxia Exposure Induces a Unique Microglial Transcriptome in 5XFAD Mice
Source: Mol Neurobiol. 2025 Nov 19;63(1):81. doi: 10.1007/s12035-025-05390-7 (PMC12627174; doi:10.1007/s12035-025-05390-7)
Supplement: Supplementary file 2 — (XLSX 437 KB) [file 12035_2025_5390_MOESM2_ESM.xlsx]

## Sheet: M WT NX vs 5X NX
	Gene Name	logFC	logCPM	LR	PValue	FDR
ENSMUSG00000061100	Retnla	-5.64495	0.0564145	28.7597	8.19404e-08	2.02247e-06
ENSMUSG00000013415	Igf2bp1	-3.69404	-0.75558	10.2534	0.00136435	0.010481
ENSMUSG00000022818	Cyp2ab1	-3.26441	-0.374925	11.0828	0.000871306	0.00720053
ENSMUSG00000036218	Pdzrn4	-3.1942	-0.142868	8.7237	0.003141	0.0207822
ENSMUSG00000030693	Klk10	-3.17645	-0.420715	10.8917	0.000965987	0.00786037
ENSMUSG00000040016	Ptger3	-3.04293	2.30377	57.8639	2.80894e-14	1.62765e-12
ENSMUSG00000107876	Gm43936	-3.00128	0.540632	24.2396	8.50653e-07	1.67134e-05
ENSMUSG00000117304	AC154912.4	-2.95739	-0.518292	8.90392	0.00284558	0.0191435
ENSMUSG00000026572	Tbx19	-2.71323	0.550068	18.546	1.65855e-05	0.000240498
ENSMUSG00000109593	Gm45431	-2.66717	1.00947	22.805	1.79299e-06	3.26747e-05
ENSMUSG00000040694	Apobec2	-2.63282	1.57309	30.2728	3.75345e-08	9.94262e-07
ENSMUSG00000059493	Nhs	-2.60481	0.561202	15.9357	6.55312e-05	0.000803379
ENSMUSG00000002076	Hsf2bp	-2.58191	2.97702	77.3616	1.42359e-18	1.29555e-16
ENSMUSG00000100599	1700120C14Rik	-2.54627	-0.430494	7.47617	0.00625209	0.0360449
ENSMUSG00000094258	Gm8159	-2.506	0.845199	16.2784	5.46848e-05	0.000687453
ENSMUSG00000112643	Gm19688	-2.43723	-0.0269289	11.8111	0.000588802	0.00518663
ENSMUSG00000041798	Gck	-2.43528	-0.0690541	9.65928	0.00188398	0.0136726
ENSMUSG00000100813	Gm28874	-2.34944	1.92312	39.3052	3.62478e-10	1.29879e-08
ENSMUSG00000107751	Gm6749	-2.29933	2.04179	24.1785	8.7809e-07	1.72069e-05
ENSMUSG00000085881	Gm15912	-2.29895	2.03441	28.4612	9.5596e-08	2.34392e-06
ENSMUSG00000075225	Ccdc162	-2.26957	3.65237	68.3272	1.385e-16	1.02697e-14
ENSMUSG00000098447	Gm27184	-2.25399	-0.0511367	8.1156	0.00438858	0.0272614
ENSMUSG00000114864	Gm41071	-2.2445	3.3414	59.0207	1.56022e-14	9.37017e-13
ENSMUSG00000035448	Ccr3	-2.23307	1.16346	14.1722	0.000166821	0.00180235
ENSMUSG00000105699	Gm43703	-2.21806	0.357283	12.2343	0.000469189	0.00425685
ENSMUSG00000029368	Alb	-2.20459	0.840456	14.6692	0.000128124	0.00142902
ENSMUSG00000047884	Klk9	-2.20432	1.04921	15.2584	9.37609e-05	0.00109258
ENSMUSG00000087217	Gm13209	-2.19548	-0.0949966	7.56247	0.00595962	0.0348228
ENSMUSG00000085760	Gm14302	-2.1847	-0.360805	7.23539	0.00714802	0.0402405
ENSMUSG00000003476	Crhr2	-2.18365	0.206202	8.62136	0.00332244	0.0216828
ENSMUSG00000028487	Bnc2	-2.17822	-0.174927	7.25663	0.00706398	0.039843
ENSMUSG00000020122	Egfr	-2.16257	0.459784	7.63016	0.00574002	0.0337793
ENSMUSG00000022537	Tmem44	-2.15305	5.66956	142.939	6.06096e-33	1.23162e-30
ENSMUSG00000031494	Cd209a	-2.14871	4.1127	81.8175	1.49249e-19	1.49592e-17
ENSMUSG00000030539	Sema4b	-2.11569	5.46205	161.315	5.83999e-37	1.46831e-34
ENSMUSG00000022376	Adcy8	-2.11306	3.34886	44.8674	2.10838e-11	8.76069e-10
ENSMUSG00000049362	Olfr173	-2.11238	1.10787	14.6554	0.000129062	0.00143839
ENSMUSG00000097178	2310002F09Rik	-2.10638	0.341081	11.453	0.00071378	0.0060992
ENSMUSG00000055546	Timd4	-2.09343	0.419138	12.8554	0.000336511	0.00321223
ENSMUSG00000073599	Ecscr	-2.08505	7.37166	76.7394	1.9507e-18	1.74318e-16
ENSMUSG00000028583	Pdpn	-2.0721	-0.0415385	9.27046	0.00232879	0.016295
ENSMUSG00000056880	Gadl1	-2.05334	1.31198	16.8653	4.0129e-05	0.000531021
ENSMUSG00000078931	Pdf	-2.05206	0.10723	9.07381	0.00259296	0.0178074
ENSMUSG00000026357	Rgs18	-2.0367	0.828252	15.7975	7.04964e-05	0.000853668
ENSMUSG00000038963	Slco4a1	-1.9982	5.92793	144.381	2.93246e-33	6.12679e-31
ENSMUSG00000027358	Bmp2	-1.99114	0.994357	11.2084	0.000814277	0.00681274
ENSMUSG00000104091	Gm37317	-1.99064	1.95181	10.72	0.00105983	0.0085073
ENSMUSG00000042371	Slc5a10	-1.97583	2.63916	24.5593	7.20562e-07	1.44249e-05
ENSMUSG00000035403	Crb2	-1.97382	0.186768	7.4179	0.00645781	0.0370711
ENSMUSG00000028654	Mycl	-1.96447	3.32993	50.5872	1.13983e-12	5.4865e-11
ENSMUSG00000003882	Il7r	-1.94466	4.27086	69.7148	6.85285e-17	5.32226e-15
ENSMUSG00000111792	Gm33858	-1.93695	5.51265	52.1941	5.02763e-13	2.53673e-11
ENSMUSG00000030054	Gp9	-1.93266	4.61563	45.2949	1.69486e-11	7.08212e-10
ENSMUSG00000026736	4930426L09Rik	-1.92682	0.98454	15.8276	6.93824e-05	0.000841553
ENSMUSG00000110062	B430319F04Rik	-1.92626	0.579513	7.77797	0.00528873	0.0315834
ENSMUSG00000028195	Cyr61	-1.91507	0.996491	11.2048	0.000815856	0.0068221
ENSMUSG00000084918	Gm12708	-1.90525	1.01771	14.6852	0.000127039	0.00142012
ENSMUSG00000003949	Hlf	-1.90063	3.798	43.3104	4.6709e-11	1.8676e-09
ENSMUSG00000096284	Tcstv1	-1.89769	0.566945	7.99135	0.00470014	0.0288345
ENSMUSG00000014198	Zfp385c	-1.89115	2.74535	34.5845	4.08141e-09	1.27729e-07
ENSMUSG00000000753	Serpinf1	-1.88535	5.64015	50.9435	9.50631e-13	4.63871e-11
ENSMUSG00000020787	P2rx1	-1.88095	3.83655	45.6289	1.42914e-11	6.03987e-10
ENSMUSG00000030165	Klrd1	-1.87761	1.93035	23.6812	1.13686e-06	2.18165e-05
ENSMUSG00000036036	Zfp57	-1.86884	0.924191	13.0855	0.000297591	0.00289663
ENSMUSG00000108461	AV356131	-1.86774	1.08955	13.4913	0.000239672	0.00241401
ENSMUSG00000017723	Wfdc2	-1.85945	0.589382	6.81657	0.00903161	0.0485065
ENSMUSG00000040950	Mgl2	-1.85212	3.55866	33.4833	7.18787e-09	2.16717e-07
ENSMUSG00000112360	Gm48614	-1.84954	1.36085	13.544	0.00023304	0.00236128
ENSMUSG00000091119	Ccdc152	-1.84833	1.04096	10.5046	0.00119078	0.00940079
ENSMUSG00000020682	Mmp28	-1.84082	3.02728	35.4522	2.61387e-09	8.46598e-08
ENSMUSG00000100465	Gm29264	-1.82578	1.24106	7.53767	0.00604222	0.0350941
ENSMUSG00000038224	Serpinf2	-1.82194	0.2063	8.30596	0.00395151	0.0249965
ENSMUSG00000086495	Gm13778	-1.8189	1.69678	16.2278	5.61637e-05	0.000702346
ENSMUSG00000030474	Siglece	-1.81484	6.37428	92.7924	5.80772e-22	7.06162e-20
ENSMUSG00000027217	Tspan18	-1.8101	5.12173	70.1226	5.57311e-17	4.37415e-15
ENSMUSG00000074570	Cass4	-1.80864	4.65092	62.355	2.86808e-15	1.84979e-13
ENSMUSG00000042826	Fgf11	-1.80465	4.05079	61.01	5.67848e-15	3.58445e-13
ENSMUSG00000037683	Armc3	-1.80029	2.89649	29.5804	5.36446e-08	1.37675e-06
ENSMUSG00000013766	Ly6g6e	-1.79239	1.15033	16.4391	5.02394e-05	0.000645239
ENSMUSG00000061039	Olfr920	-1.7873	1.06094	11.3296	0.000762806	0.00644022
ENSMUSG00000045345	9530056K15Rik	-1.78447	0.202841	6.89773	0.00863054	0.0467758
ENSMUSG00000024379	Tslp	-1.7755	1.55192	21.3939	3.73955e-06	6.4056e-05
ENSMUSG00000027273	Snap25	-1.7712	1.87592	18.0867	2.11065e-05	0.000298754
ENSMUSG00000050844	1700020N01Rik	-1.75785	0.97046	14.0468	0.000178317	0.00190436
ENSMUSG00000037922	Bank1	-1.75335	5.13242	81.2097	2.02992e-19	1.99416e-17
ENSMUSG00000043592	Unc5cl	-1.74794	0.214102	7.91877	0.00489245	0.0297315
ENSMUSG00000050138	Kcnk12	-1.74645	4.9225	42.1827	8.31311e-11	3.20303e-09
ENSMUSG00000066170	E230001N04Rik	-1.73491	0.504225	9.05842	0.00261488	0.0179165
ENSMUSG00000068735	Trp53i11	-1.72754	5.30787	78.0292	1.01527e-18	9.41281e-17
ENSMUSG00000110863	Gm34655	-1.7158	0.633295	7.9521	0.00480317	0.0292849
ENSMUSG00000036040	Adamtsl2	-1.70812	2.82046	17.5818	2.75213e-05	0.000380122
ENSMUSG00000035085	1700020L24Rik	-1.70621	2.04713	10.4612	0.00121906	0.00954931
ENSMUSG00000068196	Col8a1	-1.7041	1.4959	8.41944	0.00371231	0.0237261
ENSMUSG00000034845	Plvap	-1.69307	1.53229	17.2798	3.22599e-05	0.000436229
ENSMUSG00000112368	Gm49376	-1.69144	0.497459	7.08953	0.00775354	0.0429485
ENSMUSG00000030148	Clec4a2	-1.68968	5.59371	69.6947	6.92327e-17	5.34895e-15
ENSMUSG00000078202	Nrarp	-1.68722	1.67323	7.95017	0.00480829	0.0293041
ENSMUSG00000023153	Tmem52	-1.68485	3.70996	27.9042	1.27476e-07	3.02557e-06
ENSMUSG00000030268	Bcat1	-1.6753	0.37522	7.20035	0.00728893	0.0408787
ENSMUSG00000029369	Afm	-1.67492	1.90684	15.8763	6.76219e-05	0.000824921
ENSMUSG00000034739	Mfrp	-1.66933	2.14842	14.023	0.00018059	0.00192586
ENSMUSG00000100876	2810454H06Rik	-1.66497	0.448203	8.81167	0.0029931	0.0199546
ENSMUSG00000015354	Pcolce2	-1.6529	0.610984	7.8225	0.00515997	0.0310016
ENSMUSG00000022441	Efcab6	-1.65105	1.11678	14.0201	0.000180871	0.00192748
ENSMUSG00000024168	Tmem204	-1.63852	5.02268	65.42	6.05202e-16	4.13713e-14
ENSMUSG00000117007	AC167363.1	-1.6374	0.765888	10.7944	0.00101807	0.00822553
ENSMUSG00000057914	Cacnb2	-1.63351	3.12101	27.8328	1.32264e-07	3.11665e-06
ENSMUSG00000064039	Ccr1l1	-1.63231	1.08372	8.62631	0.00331342	0.021643
ENSMUSG00000051124	Gimap9	-1.63136	2.96718	23.3202	1.37154e-06	2.58191e-05
ENSMUSG00000114784	Gm47754	-1.62962	2.88736	31.1591	2.37718e-08	6.56667e-07
ENSMUSG00000052305	Hbb-bs	-1.62799	5.52639	14.5823	0.000134166	0.00148969
ENSMUSG00000006154	Eps8l1	-1.62683	5.4276	9.58044	0.00196661	0.0141615
ENSMUSG00000020264	Slc36a2	-1.62623	2.42462	25.655	4.08246e-07	8.63898e-06
ENSMUSG00000035373	Ccl7	-1.62181	1.65453	14.9345	0.000111307	0.00126718
ENSMUSG00000083962	Gm15707	-1.62089	0.510226	8.57728	0.00340384	0.0221071
ENSMUSG00000043639	Rbm20	-1.61702	0.425079	7.888	0.00497638	0.0300936
ENSMUSG00000031210	Gpr165	-1.60948	3.30809	11.2349	0.000802721	0.00672744
ENSMUSG00000036062	Phf24	-1.60927	0.939591	10.323	0.00131386	0.0101615
ENSMUSG00000045509	Gpr150	-1.58881	1.24444	11.1307	0.00084912	0.00704466
ENSMUSG00000035711	Dok3	-1.58846	6.2429	49.4369	2.04852e-12	9.37892e-11
ENSMUSG00000068417	Pnp2	-1.58009	2.00854	17.3138	3.16872e-05	0.000429661
ENSMUSG00000047867	Gimap6	-1.57277	4.82534	70.1226	5.57311e-17	4.37415e-15
ENSMUSG00000024548	Setbp1	-1.56628	1.92603	9.32626	0.00225893	0.0159037
ENSMUSG00000018459	Slc13a3	-1.56475	4.31193	46.7167	8.20251e-12	3.5474e-10
ENSMUSG00000037820	Tgm2	-1.56262	6.22973	82.0003	1.36065e-19	1.37305e-17
ENSMUSG00000030589	Rasgrp4	-1.55766	4.0408	37.1421	1.09829e-09	3.7367e-08
ENSMUSG00000051906	Cd209f	-1.55646	3.36233	23.4394	1.28912e-06	2.44849e-05
ENSMUSG00000016552	Foxred2	-1.55522	1.44333	13.6605	0.000219013	0.00225613
ENSMUSG00000083649	Rasl2-9	-1.55004	1.85568	18.4263	1.766e-05	0.000253846
ENSMUSG00000049436	Upk1b	-1.53417	7.09052	68.6584	1.17083e-16	8.86125e-15
ENSMUSG00000025150	Cbr2	-1.5284	4.19027	30.864	2.76755e-08	7.56056e-07
ENSMUSG00000097887	Gm26542	-1.52726	3.97546	26.8809	2.16386e-07	4.84876e-06
ENSMUSG00000097504	4930516B21Rik	-1.52703	3.26055	31.797	1.71154e-08	4.82681e-07
ENSMUSG00000035778	Ggta1	-1.51802	6.53704	101.267	8.03743e-24	1.05511e-21
ENSMUSG00000027368	Dusp2	-1.51489	1.73529	12.7656	0.000353059	0.00334223
ENSMUSG00000021061	Sptb	-1.51433	1.45473	11.9062	0.000559464	0.00496654
ENSMUSG00000022240	Ctnnd2	-1.51415	3.01012	20.854	4.95653e-06	8.22429e-05
ENSMUSG00000000901	Mmp11	-1.51259	2.17057	13.1783	0.000283215	0.00277858
ENSMUSG00000015143	Actn1	-1.50251	5.11862	55.0465	1.17714e-13	6.3497e-12
ENSMUSG00000021322	Aoah	-1.50171	2.53921	17.2973	3.1964e-05	0.000433017
ENSMUSG00000108234	Gm44428	-1.50051	1.67816	14.1434	0.000169394	0.00181955
ENSMUSG00000021200	Asb2	-1.49822	6.6082	70.7411	4.0731e-17	3.26597e-15
ENSMUSG00000111889	Gm48071	-1.49689	0.559839	7.80375	0.0052138	0.0312256
ENSMUSG00000008318	Relt	-1.49613	3.75584	39.4397	3.38344e-10	1.2182e-08
ENSMUSG00000073940	Hbb-bt	-1.49577	2.23867	8.18056	0.00423417	0.0264573
ENSMUSG00000030214	Plbd1	-1.49409	3.82855	16.1636	5.81007e-05	0.000724257
ENSMUSG00000006235	Epor	-1.49383	1.95624	11.3854	0.000740223	0.00628533
ENSMUSG00000029343	Crybb1	-1.49306	7.89679	25.7215	3.94416e-07	8.38219e-06
ENSMUSG00000069919	Hba-a1	-1.48377	5.18227	14.4206	0.000146193	0.00160588
ENSMUSG00000027459	Fam110a	-1.4819	5.94411	30.7791	2.89141e-08	7.85552e-07
ENSMUSG00000078607	1810010H24Rik	-1.48133	1.44789	12.6315	0.000379307	0.00355217
ENSMUSG00000041202	Pla2g2d	-1.48094	2.19295	17.5595	2.78458e-05	0.000383889
ENSMUSG00000086291	Gm15513	-1.47767	3.73702	39.8769	2.70488e-10	9.83435e-09
ENSMUSG00000026589	Sec16b	-1.47324	3.20044	25.1678	5.25531e-07	1.08425e-05
ENSMUSG00000004837	Grap	-1.47206	5.99277	59.2726	1.37272e-14	8.34547e-13
ENSMUSG00000038527	C1rl	-1.47156	3.47079	30.4833	3.36757e-08	9.04972e-07
ENSMUSG00000090273	Prr22	-1.45669	0.747263	6.84729	0.0088776	0.04787
ENSMUSG00000016493	Cd46	-1.45413	2.14389	16.64	4.5188e-05	0.000589033
ENSMUSG00000030468	Siglecg	-1.4513	2.67969	17.2606	3.25876e-05	0.000440259
ENSMUSG00000048126	Col6a3	-1.45069	5.35297	38.486	5.51481e-10	1.93855e-08
ENSMUSG00000028080	Lrba	-1.44983	7.26677	94.3371	2.66111e-22	3.26239e-20
ENSMUSG00000113789	Gm47322	-1.44606	0.914983	8.86943	0.00289985	0.0194556
ENSMUSG00000006445	Epha2	-1.44027	5.39612	53.7063	2.32817e-13	1.21179e-11
ENSMUSG00000103223	Gm37730	-1.42865	1.47646	11.8392	0.000579956	0.00511479
ENSMUSG00000101505	1700109G14Rik	-1.42852	1.23034	9.93206	0.00162424	0.012053
ENSMUSG00000023034	Nr4a1	-1.42533	5.18272	45.5849	1.46163e-11	6.15963e-10
ENSMUSG00000000318	Clec10a	-1.41955	3.69602	26.7324	2.33675e-07	5.18137e-06
ENSMUSG00000106227	Gm43464	-1.41908	1.1498	11.7539	0.000607158	0.00532139
ENSMUSG00000073413	Ly6g6d	-1.41764	1.4178	9.36937	0.00220642	0.0155857
ENSMUSG00000102752	Gm7694	-1.4133	4.80829	53.4435	2.66138e-13	1.3708e-11
ENSMUSG00000042286	Stab1	-1.40985	9.66043	60.207	8.53868e-15	5.2997e-13
ENSMUSG00000055184	Fam72a	-1.40778	3.85529	33.3044	7.88058e-09	2.36163e-07
ENSMUSG00000005043	Sgsh	-1.40656	4.62512	48.5753	3.17851e-12	1.42879e-10
ENSMUSG00000085175	Gm11423	-1.40477	2.63452	13.4245	0.000248353	0.00248299
ENSMUSG00000050965	Prkca	-1.40088	5.4088	52.6597	3.96656e-13	2.00819e-11
ENSMUSG00000036949	Slc39a12	-1.39997	3.93631	32.3671	1.27632e-08	3.68345e-07
ENSMUSG00000069917	Hba-a2	-1.39611	2.49622	8.59121	0.00337789	0.021977
ENSMUSG00000031790	Mmp15	-1.39604	2.16153	16.543	4.75589e-05	0.000616147
ENSMUSG00000042817	Flt3	-1.39389	2.13258	11.65	0.000642036	0.00557282
ENSMUSG00000115222	AC174678.1	-1.39171	0.853586	7.7289	0.00543437	0.0323489
ENSMUSG00000113856	Gm10790	-1.3874	7.30405	68.4947	1.2722e-16	9.53125e-15
ENSMUSG00000072720	Myo18b	-1.38293	5.92635	45.9375	1.22088e-11	5.21918e-10
ENSMUSG00000020388	Pdlim4	-1.3791	5.87103	39.0005	4.23704e-10	1.50725e-08
ENSMUSG00000022528	Hes1	-1.3713	3.49901	20.3486	6.4541e-06	0.000104406
ENSMUSG00000027224	Duoxa1	-1.37024	2.62776	11.6885	0.000628889	0.00548761
ENSMUSG00000110682	A530010L16Rik	-1.36927	1.26394	8.71789	0.00315103	0.0208021
ENSMUSG00000037347	Chst7	-1.36872	5.94815	57.2666	3.80557e-14	2.18806e-12
ENSMUSG00000021298	Gpr132	-1.3673	1.63713	9.17107	0.00245871	0.0170353
ENSMUSG00000117079	AC154187.1	-1.36351	2.98521	20.1784	7.05448e-06	0.000112887
ENSMUSG00000043832	Clec4a3	-1.36298	5.77084	63.6944	1.45296e-15	9.66511e-14
ENSMUSG00000099632	2900093K20Rik	-1.36285	1.50656	10.121	0.00146591	0.0110978
ENSMUSG00000097343	9030407P20Rik	-1.36155	1.24168	9.02608	0.00266155	0.0181858
ENSMUSG00000053063	Clec12a	-1.36116	3.47607	22.107	2.57862e-06	4.57004e-05
ENSMUSG00000106617	Gm36266	-1.35753	2.88952	26.5965	2.50694e-07	5.50933e-06
ENSMUSG00000047150	1700001C19Rik	-1.3572	1.63231	10.1562	0.0014382	0.0109239
ENSMUSG00000022353	Mtss1	-1.357	5.59736	59.1005	1.49818e-14	9.07099e-13
ENSMUSG00000023993	Treml1	-1.35153	3.27938	24.1137	9.08103e-07	1.77014e-05
ENSMUSG00000028989	Angptl7	-1.35041	3.54828	32.3526	1.28582e-08	3.70366e-07
ENSMUSG00000030865	Chp2	-1.34937	1.78155	10.1204	0.00146634	0.0110978
ENSMUSG00000040247	Tbc1d10c	-1.34893	1.63331	7.68156	0.00557878	0.0330137
ENSMUSG00000034906	Ncaph	-1.34856	4.45896	40.4248	2.0433e-10	7.50255e-09
ENSMUSG00000036185	Sapcd1	-1.34665	1.18456	7.22334	0.00719617	0.0404348
ENSMUSG00000100213	Gm28151	-1.34611	3.06618	23.4189	1.30291e-06	2.47154e-05
ENSMUSG00000020889	Nr1d1	-1.34458	3.94677	24.9408	5.91178e-07	1.20461e-05
ENSMUSG00000111844	Gm47097	-1.34007	2.46415	19.5147	9.98307e-06	0.000152984
ENSMUSG00000085287	4833418N02Rik	-1.33531	2.44414	13.6577	0.000219343	0.00225797
ENSMUSG00000030674	Qprt	-1.33199	2.86664	17.125	3.49979e-05	0.000469827
ENSMUSG00000111147	Gm33699	-1.32796	5.3862	55.3456	1.01098e-13	5.55439e-12
ENSMUSG00000025804	Ccr1	-1.3262	3.58339	23.9931	9.66826e-07	1.87231e-05
ENSMUSG00000079481	Nhsl2	-1.31938	4.19553	27.5208	1.5541e-07	3.5909e-06
ENSMUSG00000029570	Lfng	-1.31763	6.3232	51.7714	6.23521e-13	3.12477e-11
ENSMUSG00000001300	Efnb2	-1.31705	2.34011	11.7759	0.000600023	0.00526671
ENSMUSG00000113216	Gm40841	-1.31653	4.54769	26.9711	2.06522e-07	4.65585e-06
ENSMUSG00000100502	Gm28286	-1.31575	3.59616	33.8968	5.81133e-09	1.78479e-07
ENSMUSG00000079168	Cd209g	-1.31528	1.90477	9.78619	0.00175828	0.012912
ENSMUSG00000026938	Fcna	-1.31397	1.65722	12.6299	0.000379616	0.00355282
ENSMUSG00000059791	Nrm	-1.31268	5.92085	43.5463	4.14055e-11	1.66905e-09
ENSMUSG00000014791	Elmo3	-1.31221	2.3574	14.4768	0.000141893	0.00156494
ENSMUSG00000031390	Avpr2	-1.3118	2.05959	16.8277	4.09314e-05	0.000539713
ENSMUSG00000005947	Itgae	-1.31177	2.70373	10.418	0.00124795	0.00973293
ENSMUSG00000009214	Mymk	-1.30455	4.17621	19.3771	1.07286e-05	0.00016323
ENSMUSG00000018476	Kdm6b	-1.30342	4.91938	41.4596	1.20332e-10	4.53045e-09
ENSMUSG00000090019	Gimap1	-1.30138	4.29027	28.1034	1.15004e-07	2.76047e-06
ENSMUSG00000104918	Gm42944	-1.29909	4.58726	26.1674	3.13066e-07	6.78951e-06
ENSMUSG00000042734	Ttc9	-1.29729	4.29567	35.6907	2.31266e-09	7.52324e-08
ENSMUSG00000060212	Pcnx2	-1.29334	3.51932	26.1835	3.10461e-07	6.75274e-06
ENSMUSG00000086264	Gm15850	-1.29323	2.96282	23.6639	1.14714e-06	2.19853e-05
ENSMUSG00000116632	AC126457.1	-1.28979	4.12375	30.994	2.58826e-08	7.11005e-07
ENSMUSG00000090164	BC035044	-1.28456	5.97826	47.4487	5.64617e-12	2.47797e-10
ENSMUSG00000096629	Gm3383	-1.28284	2.02146	7.45845	0.00631395	0.0363591
ENSMUSG00000097318	1700007L15Rik	-1.27063	1.19189	7.50883	0.00613972	0.0355213
ENSMUSG00000052291	5330438D12Rik	-1.26826	4.11625	30.3484	3.61008e-08	9.61434e-07
ENSMUSG00000026564	Dusp27	-1.26427	4.08561	37.6264	8.56791e-10	2.94205e-08
ENSMUSG00000002944	Cd36	-1.26029	3.63689	22.3637	2.25597e-06	4.0368e-05
ENSMUSG00000054675	Tmem119	-1.25861	11.3479	28.9545	7.4098e-08	1.84734e-06
ENSMUSG00000102704	Gm38309	-1.25438	1.49704	7.96314	0.00477395	0.0291667
ENSMUSG00000029513	Prkab1	-1.25286	7.06784	63.838	1.35086e-15	9.02639e-14
ENSMUSG00000043336	Filip1l	-1.25208	5.38064	52.6904	3.90501e-13	1.9838e-11
ENSMUSG00000004814	Ccl24	-1.24251	2.2363	9.52481	0.00202713	0.0144987
ENSMUSG00000100280	Gm28417	-1.24205	4.01458	28.7859	8.0838e-08	2.00192e-06
ENSMUSG00000024486	Hbegf	-1.24136	1.52717	10.1663	0.00143034	0.0108864
ENSMUSG00000115338	Pnp	-1.23995	6.79239	27.9221	1.26296e-07	3.00719e-06
ENSMUSG00000022218	Tgm1	-1.23963	1.21505	8.17049	0.00425774	0.0265822
ENSMUSG00000034107	Ano7	-1.23944	4.34412	32.3834	1.26561e-08	3.65966e-07
ENSMUSG00000027318	Adam33	-1.2364	2.89954	14.7127	0.0001252	0.00140274
ENSMUSG00000009731	Kcnd1	-1.23273	5.99567	65.6631	5.34983e-16	3.67404e-14
ENSMUSG00000021708	Rasgrf2	-1.23247	2.96115	18.7251	1.50984e-05	0.000221753
ENSMUSG00000065987	Cd209b	-1.22663	1.781	7.33907	0.00674716	0.0384379
ENSMUSG00000096904	Gm3591	-1.22573	4.56572	41.3595	1.26654e-10	4.7444e-09
ENSMUSG00000034987	Hrh2	-1.22541	4.55106	27.2721	1.76747e-07	4.04608e-06
ENSMUSG00000084866	A930006K02Rik	-1.22478	1.18366	7.96554	0.00476763	0.0291521
ENSMUSG00000015766	Eps8	-1.22242	2.80923	16.8972	3.94587e-05	0.00052402
ENSMUSG00000020717	Pecam1	-1.22131	5.19716	33.78	6.171e-09	1.88355e-07
ENSMUSG00000021356	Irf4	-1.2208	3.26102	21.8737	2.91195e-06	5.07589e-05
ENSMUSG00000036353	P2ry12	-1.21936	11.4884	40.6978	1.77685e-10	6.54039e-09
ENSMUSG00000032528	Vipr1	-1.21881	3.76899	25.9264	3.54694e-07	7.61438e-06
ENSMUSG00000045730	Adrb2	-1.2178	6.83521	71.4591	2.83071e-17	2.28211e-15
ENSMUSG00000024013	Fgd2	-1.21697	9.36649	50.3056	1.31571e-12	6.23553e-11
ENSMUSG00000096573	1700009J07Rik	-1.21512	1.19603	8.05783	0.00453075	0.027934
ENSMUSG00000026315	Serpinb8	-1.21278	1.58705	10.0366	0.00153463	0.0115323
ENSMUSG00000018238	Gdf9	-1.21278	2.78024	16.9456	3.84662e-05	0.000511298
ENSMUSG00000052368	Gm9873	-1.2116	2.58871	15.7976	7.04911e-05	0.000853668
ENSMUSG00000090185	Gm15523	-1.20977	2.41218	15.8503	6.85558e-05	0.000833571
ENSMUSG00000033446	Lpar6	-1.20954	7.10356	64.9439	7.70601e-16	5.24362e-14
ENSMUSG00000097640	Gm20033	-1.20623	2.04617	8.47591	0.00359881	0.0231003
ENSMUSG00000012819	Cdh23	-1.2045	5.90941	55.2947	1.03747e-13	5.67892e-12
ENSMUSG00000023262	Acy1	-1.20357	4.40832	25.1835	5.21262e-07	1.07995e-05
ENSMUSG00000035773	Kiss1r	-1.20177	1.03465	7.02571	0.00803477	0.0441927
ENSMUSG00000017667	Zfp334	-1.19949	2.05747	9.08226	0.00258101	0.0177664
ENSMUSG00000049037	Clec4a1	-1.19862	3.3379	15.5547	8.01523e-05	0.000952331
ENSMUSG00000089797	Gm16118	-1.19859	4.53104	25.3529	4.7744e-07	1.00175e-05
ENSMUSG00000021087	Rtn1	-1.1929	6.42979	56.8577	4.68511e-14	2.66279e-12
ENSMUSG00000001281	Itgb7	-1.192	2.85126	8.5758	0.00340659	0.0221153
ENSMUSG00000022665	Ccdc80	-1.19169	0.929334	6.77568	0.00924085	0.0494417
ENSMUSG00000025573	6030468B19Rik	-1.19157	3.87122	17.2572	3.26451e-05	0.000440634
ENSMUSG00000045268	Zfp691	-1.19098	6.11659	58.3832	2.15721e-14	1.2749e-12
ENSMUSG00000033730	Egr3	-1.18644	2.85959	13.6768	0.000217122	0.00224445
ENSMUSG00000000686	Abhd15	-1.18433	4.45235	25.5091	4.40294e-07	9.27745e-06
ENSMUSG00000023092	Fhl1	-1.18431	1.01812	7.08432	0.00777612	0.0430254
ENSMUSG00000105679	Gm43338	-1.17385	1.09878	7.65732	0.00565425	0.0333765
ENSMUSG00000060402	Chst8	-1.17234	5.14821	19.1836	1.1873e-05	0.00017917
ENSMUSG00000048924	Ccdc125	-1.16764	2.31261	12.4	0.000429333	0.00395327
ENSMUSG00000071637	Cebpd	-1.16743	6.22228	19.1721	1.19448e-05	0.000180071
ENSMUSG00000106205	C230096K16Rik	-1.16667	3.07185	17.5341	2.82207e-05	0.000387617
ENSMUSG00000096574	Gm2956	-1.16561	2.75739	16.1409	5.8801e-05	0.00073146
ENSMUSG00000079056	Kcnip3	-1.16418	4.92914	30.9885	2.59561e-08	7.11705e-07
ENSMUSG00000038831	Ralgps1	-1.1625	5.37322	32.9829	9.29711e-09	2.74728e-07
ENSMUSG00000085912	Trp53cor1	-1.16015	1.68506	8.1258	0.00436398	0.0271427
ENSMUSG00000097296	Gm26532	-1.16004	4.00813	19.1858	1.18593e-05	0.000179145
ENSMUSG00000073412	Lst1	-1.15946	5.54629	15.1801	9.77291e-05	0.00113035
ENSMUSG00000032306	Mpi	-1.15848	5.95565	49.7317	1.76272e-12	8.12055e-11
ENSMUSG00000029299	Abcg3	-1.15773	3.58187	19.6019	9.53768e-06	0.000146613
ENSMUSG00000107726	Gm44037	-1.15621	1.78905	9.47346	0.00208466	0.0148593
ENSMUSG00000063522	2010109I03Rik	-1.15547	2.03428	8.08086	0.00447353	0.027675
ENSMUSG00000095295	Gm3488	-1.15309	3.11974	18.4183	1.77348e-05	0.000254428
ENSMUSG00000097177	9330159M07Rik	-1.15294	2.07675	8.18424	0.00422559	0.026426
ENSMUSG00000015316	Slamf1	-1.15177	2.54191	14.3178	0.000154399	0.00168905
ENSMUSG00000055866	Per2	-1.14829	2.87669	7.90899	0.00491897	0.0298437
ENSMUSG00000033152	Podxl2	-1.14626	1.72341	7.58811	0.00587544	0.0343812
ENSMUSG00000025993	Slc40a1	-1.14334	7.09796	55.6376	8.71401e-14	4.82327e-12
ENSMUSG00000003545	Fosb	-1.14247	4.99356	14.2872	0.000156926	0.00171039
ENSMUSG00000032717	Mdfi	-1.14153	5.09602	20.0296	7.62531e-06	0.00012059
ENSMUSG00000023019	Gpd1	-1.14045	3.91061	23.6313	1.16675e-06	2.22462e-05
ENSMUSG00000039672	Kcne2	-1.13939	1.73059	7.23238	0.00716002	0.0402928
ENSMUSG00000026712	Mrc1	-1.13916	6.40453	35.1348	3.07658e-09	9.85702e-08
ENSMUSG00000022519	Srl	-1.13875	2.90046	10.777	0.00102769	0.00828971
ENSMUSG00000024677	Ms4a6b	-1.13821	5.91608	54.7911	1.34049e-13	7.12716e-12
ENSMUSG00000041679	Lrrc29	-1.13745	2.39738	12.7361	0.000358667	0.00338883
ENSMUSG00000051817	Sox12	-1.13667	2.10349	11.6382	0.000646113	0.00560166
ENSMUSG00000020377	Ltc4s	-1.13653	7.15321	25.0267	5.65418e-07	1.15529e-05
ENSMUSG00000022489	Pde1b	-1.13405	6.88	45.7881	1.3176e-11	5.61645e-10
ENSMUSG00000025746	Il6	-1.13303	3.00276	12.8529	0.000336964	0.00321449
ENSMUSG00000010051	Hyal1	-1.13163	1.73317	7.66508	0.00562996	0.0332728
ENSMUSG00000091971	Hspa1a	-1.13082	4.27711	7.55932	0.00597006	0.0348523
ENSMUSG00000079484	Phyhd1	-1.13063	5.75658	29.8287	4.71965e-08	1.23043e-06
ENSMUSG00000058488	Kl	-1.1301	4.07105	9.63835	0.00190556	0.0137888
ENSMUSG00000022900	Ildr1	-1.12791	2.65135	15.3525	8.92014e-05	0.00104602
ENSMUSG00000016763	Scube1	-1.12647	3.15521	18.3004	1.88664e-05	0.000269619
ENSMUSG00000029373	Pf4	-1.12396	4.39964	13.9792	0.000184841	0.00196414
ENSMUSG00000097440	Gm6277	-1.12263	5.55156	35.2818	2.85289e-09	9.18e-08
ENSMUSG00000102674	8030442B05Rik	-1.1223	2.74792	12.5525	0.000395685	0.00367769
ENSMUSG00000059824	Dbp	-1.11832	4.47325	13.7172	0.000212502	0.00220284
ENSMUSG00000030084	Plxna1	-1.11644	3.12487	17.8268	2.41951e-05	0.000338276
ENSMUSG00000044788	Fads6	-1.11246	3.37492	19.1506	1.208e-05	0.000181924
ENSMUSG00000042155	Klhl23	-1.11184	4.11513	25.9727	3.46276e-07	7.45524e-06
ENSMUSG00000019737	Syne4	-1.11139	2.29749	11.6237	0.000651156	0.00564208
ENSMUSG00000090173	Fbxw10	-1.11077	2.4938	14.7336	0.000123822	0.00139255
ENSMUSG00000046447	Camk2n1	-1.10897	6.62577	26.2353	3.02242e-07	6.58364e-06
ENSMUSG00000028644	Ermap	-1.10673	3.1305	14.7866	0.000120389	0.00135599
ENSMUSG00000039115	Itga9	-1.10604	6.0245	26.4224	2.74339e-07	6.01114e-06
ENSMUSG00000100627	A830008E24Rik	-1.1059	3.38758	16.3518	5.2605e-05	0.000670397
ENSMUSG00000109556	Gm38843	-1.10479	4.2447	16.6531	4.48774e-05	0.000585498
ENSMUSG00000040253	Gbp7	-1.10392	4.84397	34.3247	4.66425e-09	1.45662e-07
ENSMUSG00000090086	AI480526	-1.10264	4.04053	21.5811	3.39173e-06	5.85035e-05
ENSMUSG00000098108	Gm27008	-1.09942	1.63112	8.44491	0.00366067	0.0234466
ENSMUSG00000008845	Cd163	-1.0949	4.51844	18.2383	1.94921e-05	0.000277492
ENSMUSG00000091472	Gm3739	-1.0926	5.80342	40.8856	1.61404e-10	5.98568e-09
ENSMUSG00000002104	Rapsn	-1.08948	4.58829	19.6537	9.2824e-06	0.000143582
ENSMUSG00000031217	Efnb1	-1.08883	5.11909	34.2958	4.73393e-09	1.47528e-07
ENSMUSG00000109118	Gm32031	-1.08732	1.4041	7.62766	0.00574799	0.0338087
ENSMUSG00000079164	Tlr5	-1.08551	3.83936	10.15	0.00144303	0.0109493
ENSMUSG00000021384	Susd3	-1.0846	7.79148	25.8924	3.60995e-07	7.73844e-06
ENSMUSG00000027200	Sema6d	-1.08217	3.90868	19.118	1.22878e-05	0.000184491
ENSMUSG00000055148	Klf2	-1.08192	5.4818	15.1841	9.75223e-05	0.00112931
ENSMUSG00000085887	Arhgap27os3	-1.08173	3.60569	16.3823	5.17657e-05	0.000661156
ENSMUSG00000028885	Smpdl3b	-1.07773	3.97317	18.9287	1.35697e-05	0.000202305
ENSMUSG00000020798	Spns3	-1.07771	4.28486	22.2651	2.3748e-06	4.23921e-05
ENSMUSG00000057706	Mex3b	-1.0767	3.97297	20.8341	5.00835e-06	8.30099e-05
ENSMUSG00000110218	Gm20219	-1.07333	1.672	7.33557	0.00676032	0.0384814
ENSMUSG00000059994	Fcrl1	-1.07182	5.50665	42.6984	6.38647e-11	2.48653e-09
ENSMUSG00000016918	Sulf1	-1.07173	2.38181	10.0328	0.00153779	0.0115401
ENSMUSG00000045193	Cirbp	-1.06994	7.37899	22.1724	2.49225e-06	4.43817e-05
ENSMUSG00000058290	Espl1	-1.06848	5.12722	35.8104	2.17485e-09	7.13754e-08
ENSMUSG00000113536	Gm49327	-1.06821	1.76427	8.82248	0.00297542	0.0198817
ENSMUSG00000111535	Gm35154	-1.06363	2.03029	8.8543	0.00292399	0.0195645
ENSMUSG00000040592	Cd79b	-1.06006	4.46771	13.9465	0.000188085	0.00199289
ENSMUSG00000037972	Snn	-1.05988	7.74451	51.5376	7.0239e-13	3.4847e-11
ENSMUSG00000090272	Mndal	-1.05811	2.68106	9.20416	0.00241466	0.0167945
ENSMUSG00000061882	Ccdc62	-1.05597	4.06443	20.9013	4.83556e-06	8.05058e-05
ENSMUSG00000069763	Tmem100	-1.05504	5.69213	34.9999	3.29726e-09	1.0496e-07
ENSMUSG00000038463	Olfml2b	-1.04536	5.3536	24.4832	7.4961e-07	1.49258e-05
ENSMUSG00000087259	2610035D17Rik	-1.04216	2.94644	8.72893	0.003132	0.0207411
ENSMUSG00000024399	Ltb	-1.04184	3.5119	6.86302	0.00879975	0.0475539
ENSMUSG00000024985	Tcf7l2	-1.04043	4.39169	26.1737	3.12043e-07	6.77723e-06
ENSMUSG00000074342	I830077J02Rik	-1.04009	6.9981	41.3026	1.30392e-10	4.8599e-09
ENSMUSG00000031785	Adgrg1	-1.03976	9.97273	29.6039	5.29984e-08	1.36489e-06
ENSMUSG00000025104	Hdgfl3	-1.03974	3.29144	11.3667	0.000747727	0.00634179
ENSMUSG00000096793	Gm3002	-1.03907	2.8006	8.4946	0.00356201	0.0229223
ENSMUSG00000055435	Maf	-1.03525	8.75366	44.2415	2.90264e-11	1.18944e-09
ENSMUSG00000039109	F13a1	-1.0332	5.1548	22.7485	1.84647e-06	3.35559e-05
ENSMUSG00000030302	Atp2b2	-1.03235	2.29899	7.22194	0.0072018	0.040439
ENSMUSG00000027488	Snta1	-1.03211	6.67055	23.3625	1.3417e-06	2.53216e-05
ENSMUSG00000018417	Myo1b	-1.03048	5.43535	20.2786	6.69453e-06	0.000107825
ENSMUSG00000102059	Gm20257	-1.03025	3.13275	10.2008	0.00140379	0.0107395
ENSMUSG00000028976	Slc2a5	-1.02856	9.28092	29.3305	6.10267e-08	1.55278e-06
ENSMUSG00000097077	Gm16712	-1.0285	1.89077	7.27963	0.00697408	0.0394562
ENSMUSG00000022610	Mapk12	-1.02812	1.98703	7.54054	0.0060326	0.035052
ENSMUSG00000021573	Tppp	-1.02116	5.69714	28.1883	1.10067e-07	2.65486e-06
ENSMUSG00000093898	Gm3629	-1.02072	2.22037	10.1867	0.00141456	0.0108044
ENSMUSG00000028957	Per3	-1.02045	4.898	12.2992	0.000453143	0.00413148
ENSMUSG00000028545	Bend5	-1.01914	2.68792	9.01101	0.00268359	0.0182775
ENSMUSG00000036106	Prr5	-1.01884	3.18826	9.20338	0.00241569	0.0167945
ENSMUSG00000060244	Alyref2	-1.01766	2.31344	9.02644	0.00266102	0.0181858
ENSMUSG00000047583	Tyw3	-1.0171	3.36672	16.6727	4.44148e-05	0.000580484
ENSMUSG00000074272	Ceacam1	-1.01687	5.01603	24.4405	7.66425e-07	1.51994e-05
ENSMUSG00000006344	Ggt5	-1.01625	5.92059	35.8372	2.14511e-09	7.05554e-08
ENSMUSG00000094634	Gm3468	-1.0159	4.38306	24.0957	9.16637e-07	1.78444e-05
ENSMUSG00000078794	Dact3	-1.01554	3.41166	9.11609	0.00253371	0.0174651
ENSMUSG00000056724	Nbeal2	-1.0145	7.00607	36.9164	1.23304e-09	4.1665e-08
ENSMUSG00000103367	Gm38158	-1.01181	4.98468	28.8414	7.85537e-08	1.95514e-06
ENSMUSG00000059336	Slc14a1	-1.0094	2.68559	12.3047	0.000451822	0.00412197
ENSMUSG00000001741	Il16	-1.00692	6.95178	31.7518	1.75191e-08	4.93127e-07
ENSMUSG00000032515	Csrnp1	-1.00637	4.15069	20.0516	7.53788e-06	0.000119493
ENSMUSG00000056069	Otulinl	-1.00605	8.5766	43.0815	5.25057e-11	2.08254e-09
ENSMUSG00000063849	Ppcdc	-1.00506	7.74981	40.3736	2.09761e-10	7.66403e-09
ENSMUSG00000007030	Vwa7	-1.00207	2.01711	7.78449	0.00526967	0.0314949
ENSMUSG00000050299	Gm9843	1.00009	5.52278	11.6744	0.000633646	0.00551391
ENSMUSG00000019158	Tmem160	1.00099	5.09192	10.6826	0.00108146	0.00864815
ENSMUSG00000022415	Syngr1	1.00159	8.97761	23.8793	1.02569e-06	1.98372e-05
ENSMUSG00000038900	Rpl12	1.00358	9.13266	15.8992	6.68052e-05	0.000815628
ENSMUSG00000058454	Dhcr7	1.00433	5.6108	29.2545	6.34679e-08	1.61213e-06
ENSMUSG00000026603	Smyd2	1.00547	1.63195	6.93282	0.00846281	0.0460012
ENSMUSG00000020572	Nampt	1.00607	5.84062	43.1427	5.08904e-11	2.02388e-09
ENSMUSG00000089682	Bcl2l2	1.00708	3.97174	19.6364	9.36654e-06	0.000144566
ENSMUSG00000035790	Cep19	1.00777	2.39544	8.71835	0.00315024	0.0208021
ENSMUSG00000000278	Scpep1	1.00906	7.26732	37.0153	1.17209e-09	3.96957e-08
ENSMUSG00000008683	Rps15a	1.00916	8.40484	16.6242	4.55652e-05	0.000593428
ENSMUSG00000040721	Zfhx2	1.00986	3.23358	17.2446	3.28626e-05	0.000442363
ENSMUSG00000050856	Atp5k	1.01012	4.12504	9.52534	0.00202654	0.0144987
ENSMUSG00000019986	Ahi1	1.01075	2.47123	8.36867	0.00381746	0.0242623
ENSMUSG00000035885	Cox8a	1.01095	6.93986	13.7827	0.000205214	0.00213624
ENSMUSG00000028333	Anp32b	1.01258	6.40528	25.3472	4.78852e-07	1.00329e-05
ENSMUSG00000028496	Mllt3	1.01298	2.33966	9.89913	0.00165357	0.012237
ENSMUSG00000063172	Hspb11	1.01317	2.72344	7.23036	0.00716809	0.0403179
ENSMUSG00000060419	Rps16-ps2	1.01366	6.04227	13.4337	0.00024714	0.00247373
ENSMUSG00000028081	Rps3a1	1.01426	9.76553	17.3857	3.05118e-05	0.00041677
ENSMUSG00000064109	Hcst	1.01492	4.24592	13.5684	0.000230029	0.00234037
ENSMUSG00000027995	Tlr2	1.01576	7.79919	43.9201	3.42051e-11	1.39779e-09
ENSMUSG00000069972	Rps13-ps2	1.01607	3.03889	10.6061	0.00112717	0.0089558
ENSMUSG00000028645	Slc2a1	1.01644	6.87007	27.5636	1.52011e-07	3.52332e-06
ENSMUSG00000071532	Gm10335	1.0168	5.1437	12.6116	0.000383362	0.0035766
ENSMUSG00000111686	Rab7-ps1	1.02095	1.78031	7.93212	0.0048565	0.0295493
ENSMUSG00000064368	mt-Nd6	1.0211	9.36038	16.6055	4.60182e-05	0.000598277
ENSMUSG00000081684	Rps2-ps13	1.02163	4.85382	16.265	5.50724e-05	0.000691153
ENSMUSG00000096617	Gm5559	1.02172	4.38906	14.2111	0.000163402	0.00177057
ENSMUSG00000060938	Rpl26	1.02239	9.12071	14.8049	0.000119228	0.00134497
ENSMUSG00000025466	Fuom	1.0247	2.57223	10.1023	0.00148087	0.0112021
ENSMUSG00000081855	Rpl17-ps5	1.02503	3.79077	13.4655	0.000242995	0.00244213
ENSMUSG00000084349	Rpl3-ps1	1.02532	6.30328	15.768	7.16025e-05	0.000863538
ENSMUSG00000032902	Slc16a1	1.02659	4.81366	28.4517	9.60677e-08	2.3516e-06
ENSMUSG00000029614	Rpl6	1.0296	9.43439	19.4306	1.04323e-05	0.000158883
ENSMUSG00000030872	Gga2	1.02983	4.76954	29.7749	4.85227e-08	1.26278e-06
ENSMUSG00000027378	Nphp1	1.03109	2.92527	13.6002	0.00022616	0.0023121
ENSMUSG00000026688	Mgst3	1.0315	3.70569	15.5922	7.85786e-05	0.000937005
ENSMUSG00000063696	Gm8730	1.0317	2.9647	9.17709	0.00245063	0.0169952
ENSMUSG00000003500	Impdh1	1.03211	2.94039	9.14072	0.00249982	0.0172717
ENSMUSG00000018585	Atox1	1.03352	6.54667	19.8872	8.21497e-06	0.000129227
ENSMUSG00000109783	Gm45338	1.03413	1.96954	9.67612	0.00186679	0.0136039
ENSMUSG00000028234	Rps20	1.0363	8.4388	15.5807	7.90586e-05	0.000941553
ENSMUSG00000027611	Procr	1.03643	3.07715	13.1511	0.00028735	0.00281171
ENSMUSG00000057863	Rpl36	1.0365	7.94189	14.9862	0.000108299	0.00123864
ENSMUSG00000035121	Neil2	1.03731	2.36522	9.14379	0.00249564	0.0172508
ENSMUSG00000028416	Bag1	1.03826	6.96327	22.9356	1.67517e-06	3.06907e-05
ENSMUSG00000006740	Kif5b	1.03852	5.8928	16.3825	5.17615e-05	0.000661156
ENSMUSG00000025290	Rps24	1.03907	9.59676	16.569	4.69127e-05	0.000608307
ENSMUSG00000071644	Eef1g	1.03936	7.9371	27.7172	1.40408e-07	3.28001e-06
ENSMUSG00000029592	Usp30	1.04083	5.82931	41.3455	1.27568e-10	4.7666e-09
ENSMUSG00000026358	Rgs1	1.04107	5.4606	25.664	4.06332e-07	8.61076e-06
ENSMUSG00000004530	Coro1c	1.04114	6.6747	47.2112	6.37363e-12	2.78898e-10
ENSMUSG00000057135	Scimp	1.04188	2.93855	9.98665	0.00157679	0.011742
ENSMUSG00000028926	Cdk14	1.04201	4.26749	18.6331	1.58442e-05	0.000231331
ENSMUSG00000032198	Dock6	1.04205	4.93884	30.8505	2.78692e-08	7.59948e-07
ENSMUSG00000033083	Tbc1d4	1.0422	4.61851	16.303	5.39777e-05	0.000681748
ENSMUSG00000023992	Trem2	1.04287	11.6527	18.397	1.79341e-05	0.000256791
ENSMUSG00000067121	Gm7027	1.04336	1.79368	6.7895	0.00916957	0.0491407
ENSMUSG00000007892	Rplp1	1.04345	10.3661	13.279	0.000268402	0.00265431
ENSMUSG00000066116	Gm10154	1.04435	3.62651	14.1567	0.000168198	0.00181326
ENSMUSG00000035969	Rusc2	1.04602	5.66293	38.0463	6.90869e-10	2.39447e-08
ENSMUSG00000066571	4931406P16Rik	1.04675	4.47335	8.10591	0.00441212	0.0273618
ENSMUSG00000078126	Rpl23a-ps3	1.04972	5.64394	16.3484	5.2702e-05	0.000671057
ENSMUSG00000029053	Prkcz	1.04993	2.40311	10.1792	0.00142031	0.0108323
ENSMUSG00000028943	Espn	1.05013	2.38467	11.8688	0.000570837	0.00504344
ENSMUSG00000062006	Rpl34	1.05128	8.50736	15.4014	8.69255e-05	0.00102256
ENSMUSG00000030342	Cd9	1.05193	10.3585	26.4616	2.68823e-07	5.89898e-06
ENSMUSG00000046364	Rpl27a	1.0527	9.22651	16.4508	4.99283e-05	0.000641831
ENSMUSG00000075702	Selenom	1.05411	3.11677	8.70372	0.00317561	0.0209143
ENSMUSG00000047965	Rpl9-ps7	1.05417	2.37307	9.67574	0.00186717	0.0136039
ENSMUSG00000036305	Rpl39-ps	1.05447	2.3421	9.49886	0.002056	0.0146769
ENSMUSG00000022594	Lynx1	1.05631	1.97051	6.85129	0.00885772	0.0477975
ENSMUSG00000032238	Rora	1.05771	3.44571	10.2968	0.00133261	0.0102905
ENSMUSG00000025465	Echs1	1.05795	6.57692	42.9222	5.69593e-11	2.24121e-09
ENSMUSG00000084106	Gm6136	1.0583	6.93097	28.4332	9.69892e-08	2.36634e-06
ENSMUSG00000084416	Rpl10a-ps1	1.05859	4.32941	17.3423	3.12156e-05	0.000424041
ENSMUSG00000049517	Rps23	1.05913	9.55158	15.851	6.85301e-05	0.000833571
ENSMUSG00000078974	Sec61g	1.06079	4.9558	13.3698	0.000255712	0.0025475
ENSMUSG00000016487	Ppfibp1	1.06091	3.71319	15.5644	7.97408e-05	0.000948577
ENSMUSG00000028270	Gbp2	1.06093	3.85408	7.44655	0.0063558	0.0365576
ENSMUSG00000048537	Phldb1	1.06299	5.14164	29.5843	5.35369e-08	1.37637e-06
ENSMUSG00000066315	Gm12918	1.06583	3.38106	11.3592	0.000750771	0.00635313
ENSMUSG00000019872	Smpdl3a	1.06692	5.69485	39.4622	3.34467e-10	1.20796e-08
ENSMUSG00000021069	Pygl	1.06764	4.81708	29.7458	4.92564e-08	1.27963e-06
ENSMUSG00000070427	Il18bp	1.06829	3.40151	17.2829	3.22077e-05	0.000435921
ENSMUSG00000002580	Mien1	1.06878	3.25647	13.8576	0.000197197	0.00207169
ENSMUSG00000031644	Nek1	1.06886	3.3575	12.0239	0.000525217	0.00468776
ENSMUSG00000000740	Rpl13	1.07057	9.88728	14.2478	0.000160246	0.00174018
ENSMUSG00000030677	Kif22	1.07131	2.11252	9.02117	0.00266871	0.018218
ENSMUSG00000023191	P3h3	1.07675	6.07947	43.5068	4.22494e-11	1.69845e-09
ENSMUSG00000025068	Gsto1	1.07881	5.71761	20.3797	6.35011e-06	0.000102871
ENSMUSG00000025153	Fasn	1.07882	5.66959	36.5768	1.46769e-09	4.89252e-08
ENSMUSG00000084821	Gm15880	1.08039	3.30282	18.4662	1.72945e-05	0.000249074
ENSMUSG00000058542	Gm15590	1.08135	2.29055	8.86397	0.00290854	0.0194963
ENSMUSG00000055093	Gm8430	1.08188	3.53619	11.5617	0.000673246	0.00579624
ENSMUSG00000001542	Ell2	1.08212	4.09116	26.8498	2.199e-07	4.89788e-06
ENSMUSG00000050708	Ftl1	1.08277	9.87368	15.9073	6.65219e-05	0.000813108
ENSMUSG00000026701	Prdx6	1.08335	5.6158	27.0884	1.94362e-07	4.4085e-06
ENSMUSG00000043263	Ifi209	1.0842	4.34559	27.4708	1.59481e-07	3.67351e-06
ENSMUSG00000078193	Gm2000	1.08473	5.02474	15.0029	0.000107345	0.00123152
ENSMUSG00000016206	H2-M3	1.08553	6.30393	33.5441	6.96677e-09	2.10908e-07
ENSMUSG00000036499	Eea1	1.08589	5.46188	18.7361	1.50117e-05	0.000220697
ENSMUSG00000091086	Rpl6l	1.08598	6.08843	20.494	5.98193e-06	9.72982e-05
ENSMUSG00000008668	Rps18	1.0861	8.97408	17.0583	3.62488e-05	0.00048574
ENSMUSG00000057113	Npm1	1.08611	7.75339	36.5852	1.46139e-09	4.88249e-08
ENSMUSG00000018537	Pcgf2	1.08631	2.88134	13.8217	0.000201001	0.00210123
ENSMUSG00000031010	Usp9x	1.08638	5.95013	7.93301	0.00485411	0.0295493
ENSMUSG00000024590	Lmnb1	1.08657	4.35259	25.0391	5.61793e-07	1.14947e-05
ENSMUSG00000020189	Osbpl8	1.08699	6.15829	32.5338	1.17138e-08	3.4071e-07
ENSMUSG00000083411	Rpl30-ps10	1.08789	5.21723	21.376	3.77459e-06	6.45816e-05
ENSMUSG00000068240	Gm11808	1.08881	6.67486	10.6389	0.00110731	0.00882635
ENSMUSG00000084111	Gm15710	1.09362	3.99099	12.5003	0.000406882	0.0037676
ENSMUSG00000028917	Plekhm2	1.09504	7.08167	50.2174	1.37619e-12	6.48078e-11
ENSMUSG00000032018	Sc5d	1.09738	4.96237	35.4386	2.63215e-09	8.50661e-08
ENSMUSG00000041488	Stx3	1.09879	3.90935	20.8206	5.04388e-06	8.35055e-05
ENSMUSG00000026675	Hsd17b7	1.09902	2.43833	7.4505	0.00634187	0.0364916
ENSMUSG00000046805	Mpeg1	1.09988	11.7014	29.11	6.83832e-08	1.72516e-06
ENSMUSG00000073987	Ggh	1.10041	6.12771	41.8464	9.87309e-11	3.74572e-09
ENSMUSG00000026104	Stat1	1.1017	6.05289	33.5627	6.90026e-09	2.09322e-07
ENSMUSG00000060989	Gm11847	1.10326	1.90554	8.18082	0.00423355	0.0264573
ENSMUSG00000022360	Atad2	1.10374	4.0031	19.7537	8.80889e-06	0.000137404
ENSMUSG00000058603	Rpl28-ps1	1.10389	4.93074	14.5861	0.000133901	0.00148785
ENSMUSG00000044533	Rps2	1.10487	8.93352	20.5	5.96315e-06	9.70991e-05
ENSMUSG00000060739	Nsa2	1.10722	6.82833	31.4404	2.05658e-08	5.7561e-07
ENSMUSG00000040483	Xaf1	1.10756	5.00247	42.5943	6.73543e-11	2.61553e-09
ENSMUSG00000031246	Sh3bgrl	1.10786	4.89677	31.7372	1.76512e-08	4.95905e-07
ENSMUSG00000026600	Soat1	1.1088	7.236	48.1625	3.92328e-12	1.73725e-10
ENSMUSG00000046721	Rpl14-ps1	1.11582	6.80729	18.7391	1.4988e-05	0.000220567
ENSMUSG00000026796	Fam129b	1.11675	5.65011	30.8744	2.75278e-08	7.53409e-07
ENSMUSG00000082475	Gm7206	1.11742	1.53594	7.95515	0.00479509	0.0292589
ENSMUSG00000034574	Daam1	1.11746	4.90558	31.8761	1.64324e-08	4.66971e-07
ENSMUSG00000067274	Rplp0	1.11767	10.2695	20.6156	5.61361e-06	9.2422e-05
ENSMUSG00000026615	Eprs	1.11812	6.43882	47.0637	6.87154e-12	2.98922e-10
ENSMUSG00000027078	Ube2l6	1.1183	5.07457	23.0761	1.55714e-06	2.88371e-05
ENSMUSG00000041697	Cox6a1	1.11954	7.24047	16.5277	4.79452e-05	0.000620348
ENSMUSG00000079641	Rpl39	1.12036	7.88646	19.714	8.99397e-06	0.00013985
ENSMUSG00000074093	Svip	1.12046	3.63158	22.6391	1.95465e-06	3.52741e-05
ENSMUSG00000020277	Pfkl	1.12067	7.40077	45.7609	1.33605e-11	5.66256e-10
ENSMUSG00000063810	Alms1	1.12089	2.26635	6.97744	0.00825437	0.0451162
ENSMUSG00000047215	Rpl9	1.12107	8.64405	21.283	3.96222e-06	6.72489e-05
ENSMUSG00000025321	Itgb8	1.12193	1.90749	9.07481	0.00259154	0.0178059
ENSMUSG00000045005	Fzd5	1.12202	2.8648	17.6381	2.67186e-05	0.000370414
ENSMUSG00000069793	Slfn9	1.12233	3.31577	14.2012	0.000164263	0.00177602
ENSMUSG00000029455	Aldh2	1.12239	7.24886	33.6401	6.63099e-09	2.01566e-07
ENSMUSG00000066621	Tecpr1	1.12267	6.66175	59.3709	1.30587e-14	8.00463e-13
ENSMUSG00000021458	2010111I01Rik	1.1241	4.85202	32.1632	1.41753e-08	4.06725e-07
ENSMUSG00000058655	Eif4b	1.12473	8.10729	56.0146	7.19334e-14	4.02664e-12
ENSMUSG00000058013	44815	1.12563	4.89537	38.395	5.77795e-10	2.02146e-08
ENSMUSG00000039195	1110008P14Rik	1.12574	2.71441	11.7086	0.000622135	0.00543827
ENSMUSG00000026123	Plekhb2	1.12631	6.65697	53.5651	2.50162e-13	1.293e-11
ENSMUSG00000038390	Gpr162	1.12722	5.78845	39.5596	3.18201e-10	1.15408e-08
ENSMUSG00000037563	Rps16	1.12818	8.9054	17.5821	2.7517e-05	0.000380122
ENSMUSG00000021838	Samd4	1.1286	1.91791	7.00003	0.00815081	0.0446343
ENSMUSG00000029076	Sdf4	1.12929	8.71192	42.5058	7.04724e-11	2.72947e-09
ENSMUSG00000018774	Cd68	1.12999	10.6154	23.3468	1.3527e-06	2.54967e-05
ENSMUSG00000079139	Gm4204	1.13002	4.28345	32.6857	1.0833e-08	3.16332e-07
ENSMUSG00000083563	Gm13340	1.13035	1.48967	8.53219	0.0034892	0.0225627
ENSMUSG00000026222	Sp100	1.13065	5.68277	44.7623	2.22464e-11	9.19231e-10
ENSMUSG00000046718	Bst2	1.13093	7.33999	18.0807	2.11742e-05	0.000299426
ENSMUSG00000070639	Lrrc8b	1.13149	2.92418	17.4124	3.00851e-05	0.00041208
ENSMUSG00000036825	Ssx2ip	1.13152	3.70293	21.0604	4.45025e-06	7.47621e-05
ENSMUSG00000037697	Ddhd1	1.13186	4.44346	19.7887	8.64904e-06	0.000135623
ENSMUSG00000080921	Rpl38-ps2	1.13213	4.7366	15.2314	9.51089e-05	0.00110741
ENSMUSG00000063556	Gm10132	1.13244	3.27482	17.0562	3.62888e-05	0.000485838
ENSMUSG00000040043	Rbms2	1.13254	4.07033	29.0559	7.03184e-08	1.76797e-06
ENSMUSG00000058558	Rpl5	1.13313	9.56599	24.7816	6.42073e-07	1.29939e-05
ENSMUSG00000045690	Wdr89	1.13409	5.87217	14.4213	0.000146144	0.00160588
ENSMUSG00000024608	Rps14	1.13443	9.60997	17.6447	2.66258e-05	0.000369819
ENSMUSG00000041308	Sntb2	1.13447	3.68137	21.8747	2.91045e-06	5.07589e-05
ENSMUSG00000016494	Cd34	1.13562	8.80945	50.582	1.14287e-12	5.4865e-11
ENSMUSG00000027074	Slc43a3	1.13797	2.76299	16.332	5.31587e-05	0.000676291
ENSMUSG00000040596	Pogk	1.13812	5.78636	31.6293	1.86597e-08	5.23246e-07
ENSMUSG00000024736	Tmem132a	1.13874	5.87767	22.1315	2.54596e-06	4.51756e-05
ENSMUSG00000067038	Rps12-ps3	1.13882	6.97983	17.4058	3.01901e-05	0.000413137
ENSMUSG00000106037	Gm4332	1.1415	4.59596	13.4621	0.00024343	0.00244319
ENSMUSG00000079435	Rpl36a	1.14154	7.56401	19.4732	1.02023e-05	0.000155862
ENSMUSG00000058546	Rpl23a	1.14242	7.74266	13.287	0.00026725	0.00264645
ENSMUSG00000026893	Gca	1.1453	3.51876	21.8153	3.00196e-06	5.21442e-05
ENSMUSG00000099032	Tcf24	1.1462	1.69327	7.04407	0.00795279	0.0438068
ENSMUSG00000046993	Gm5637	1.14686	2.62402	8.81414	0.00298905	0.0199458
ENSMUSG00000019971	Cep290	1.14757	2.51889	7.59948	0.00583851	0.0342191
ENSMUSG00000039001	Rps21	1.14809	8.62449	15.6825	7.49148e-05	0.000899827
ENSMUSG00000046330	Rpl37a	1.14918	8.94559	17.6924	2.59665e-05	0.000361338
ENSMUSG00000044339	Alkbh2	1.15006	3.40675	16.2503	5.55011e-05	0.000695946
ENSMUSG00000032353	Tmed3	1.15044	7.49099	32.9101	9.652e-09	2.8352e-07
ENSMUSG00000064372	mt-Tp	1.15045	4.38901	20.3109	6.58257e-06	0.000106137
ENSMUSG00000033355	Rtp4	1.15053	5.16125	18.6489	1.57136e-05	0.000229877
ENSMUSG00000031198	Fundc2	1.15104	4.71655	28.0701	1.17e-07	2.80385e-06
ENSMUSG00000039270	Megf9	1.1511	4.06089	21.2108	4.11436e-06	6.95923e-05
ENSMUSG00000061848	Gm5805	1.15292	2.42354	11.6444	0.00064397	0.00558634
ENSMUSG00000004032	Gstm5	1.15399	4.08459	16.8885	3.96419e-05	0.000525982
ENSMUSG00000017466	Timp2	1.15477	10.0303	39.217	3.79233e-10	1.35555e-08
ENSMUSG00000086583	Gm15500	1.15522	6.10752	24.3648	7.97105e-07	1.57657e-05
ENSMUSG00000027035	Cers6	1.15606	4.89919	27.3206	1.72367e-07	3.95193e-06
ENSMUSG00000020315	Sptbn1	1.15683	5.70268	17.5988	2.72758e-05	0.000377433
ENSMUSG00000020814	Mxra7	1.15818	2.13985	11.773	0.000600948	0.00527171
ENSMUSG00000025967	Eef1b2	1.1583	8.38393	21.9777	2.75837e-06	4.84232e-05
ENSMUSG00000029994	Anxa4	1.15861	5.00107	45.1536	1.82172e-11	7.59085e-10
ENSMUSG00000024737	Slc15a3	1.15956	8.34686	38.6896	4.96844e-10	1.75481e-08
ENSMUSG00000024909	Efemp2	1.16056	4.62769	21.6914	3.20232e-06	5.54943e-05
ENSMUSG00000045725	Prr15	1.16198	2.10041	7.54245	0.0060262	0.0350285
ENSMUSG00000051166	Eml5	1.16305	2.65941	11.9069	0.00055927	0.00496654
ENSMUSG00000024521	Pmaip1	1.16345	3.61113	20.8975	4.84519e-06	8.05758e-05
ENSMUSG00000032482	Cspg5	1.1636	2.05406	9.0665	0.00260335	0.0178622
ENSMUSG00000069682	Gm10275	1.16373	6.93167	20.0649	7.48593e-06	0.000119021
ENSMUSG00000040952	Rps19	1.166	8.32374	18.1255	2.06816e-05	0.0002933
ENSMUSG00000057322	Rpl38	1.16609	8.10412	19.312	1.11006e-05	0.000168716
ENSMUSG00000062382	Ftl1-ps1	1.168	4.40644	16.4507	4.99308e-05	0.000641831
ENSMUSG00000002006	Pdzd4	1.16809	2.31863	9.90825	0.0016454	0.0121856
ENSMUSG00000105388	Rpl36a-ps2	1.16992	4.29994	19.1917	1.18229e-05	0.000178778
ENSMUSG00000069939	Gm12070	1.17167	2.69087	14.2039	0.000164028	0.00177602
ENSMUSG00000045414	1190002N15Rik	1.17294	5.0118	31.1349	2.40705e-08	6.63684e-07
ENSMUSG00000083596	Rpl21-ps15	1.17334	7.09267	22.5171	2.08277e-06	3.74949e-05
ENSMUSG00000041453	Rpl21	1.17354	8.2217	16.087	6.0499e-05	0.000749118
ENSMUSG00000020808	Pimreg	1.17389	1.4443	6.93453	0.00845471	0.0459909
ENSMUSG00000025508	Rplp2	1.17574	9.01258	15.9152	6.62429e-05	0.000811435
ENSMUSG00000063142	Kcnma1	1.17661	3.72176	13.8373	0.00019934	0.00208681
ENSMUSG00000050914	Ankrd37	1.17786	1.91241	9.72158	0.00182117	0.0133211
ENSMUSG00000066180	Gm10155	1.1788	1.79984	6.94725	0.00839481	0.0456986
ENSMUSG00000034854	Mfsd12	1.17882	6.5495	33.217	8.24287e-09	2.46522e-07
ENSMUSG00000068014	Gm14648	1.17908	2.86086	14.0678	0.000176336	0.00188728
ENSMUSG00000031327	Chic1	1.18003	2.32793	11.0267	0.000898069	0.0073765
ENSMUSG00000019726	Lyst	1.18024	6.18977	21.0288	4.52431e-06	7.59204e-05
ENSMUSG00000021830	Txndc16	1.18156	6.2359	58.872	1.68272e-14	1.00247e-12
ENSMUSG00000026495	Efcab2	1.18264	2.24614	13.5832	0.000228219	0.00232967
ENSMUSG00000022211	Carmil3	1.18343	1.98639	10.8152	0.00100672	0.00815603
ENSMUSG00000026879	Gsn	1.18423	4.75248	33.522	7.04632e-09	2.12882e-07
ENSMUSG00000081087	Rps15a-ps7	1.18512	2.62133	12.5935	0.000387087	0.00360413
ENSMUSG00000078636	Gm7336	1.18521	3.18516	15.7707	7.15006e-05	0.000863011
ENSMUSG00000057841	Rpl32	1.18761	8.76646	21.5381	3.4686e-06	5.97598e-05
ENSMUSG00000021823	Vcl	1.1879	3.38958	7.54763	0.00600891	0.0349425
ENSMUSG00000021003	Galc	1.18802	6.34925	62.5538	2.59259e-15	1.67941e-13
ENSMUSG00000062190	Lancl2	1.18844	1.57273	7.72713	0.0054397	0.0323676
ENSMUSG00000040268	Plekha1	1.18853	6.86773	46.3138	1.00751e-11	4.34459e-10
ENSMUSG00000030577	Cd22	1.19046	5.65129	42.8707	5.84809e-11	2.29499e-09
ENSMUSG00000046432	Bex3	1.19048	3.91464	16.5119	4.83449e-05	0.000624693
ENSMUSG00000031004	Mki67	1.19117	3.82151	18.8533	1.41166e-05	0.000209197
ENSMUSG00000053581	Zfand2a	1.19297	5.37434	53.2563	2.92745e-13	1.49744e-11
ENSMUSG00000027506	Tpd52	1.19439	7.63648	65.6921	5.2716e-16	3.63716e-14
ENSMUSG00000020120	Plek	1.19555	9.46108	46.1249	1.1095e-11	4.77054e-10
ENSMUSG00000020234	4930404N11Rik	1.20047	1.29664	6.96756	0.00830007	0.0453159
ENSMUSG00000031748	Gnao1	1.20114	3.03346	8.11587	0.00438795	0.0272614
ENSMUSG00000018428	Akap1	1.20229	5.20093	43.591	4.04688e-11	1.63574e-09
ENSMUSG00000019066	Rab3d	1.20462	3.72398	18.8762	1.39479e-05	0.000207318
ENSMUSG00000027931	Npr1	1.20511	2.44678	11.0869	0.00086939	0.00718871
ENSMUSG00000060639	Hist1h4i	1.2054	2.19242	9.01165	0.00268264	0.0182775
ENSMUSG00000037742	Eef1a1	1.20649	12.5119	34.8197	3.61699e-09	1.14158e-07
ENSMUSG00000001700	Gramd3	1.20777	2.29396	10.4188	0.00124738	0.00973293
ENSMUSG00000068267	Cenpb	1.20785	6.82706	25.652	4.08869e-07	8.63984e-06
ENSMUSG00000027329	Spef1	1.20986	1.16545	7.54758	0.00600906	0.0349425
ENSMUSG00000012848	Rps5	1.20995	9.19602	21.8967	2.87732e-06	5.02735e-05
ENSMUSG00000037738	Nek5	1.21108	1.07489	8.15076	0.00430431	0.0268165
ENSMUSG00000060716	Plekhh1	1.21283	1.77527	7.9886	0.00470727	0.0288663
ENSMUSG00000091649	Phf11b	1.21393	5.49813	33.4362	7.36392e-09	2.21575e-07
ENSMUSG00000022351	Sqle	1.21474	3.41275	24.4884	7.47574e-07	1.49053e-05
ENSMUSG00000000386	Mx1	1.21582	4.5262	28.3587	1.00792e-07	2.44305e-06
ENSMUSG00000011752	Pgam1	1.21767	6.55068	63.4719	1.62673e-15	1.07727e-13
ENSMUSG00000058163	Gm5431	1.2184	4.12004	29.9589	4.4131e-08	1.16484e-06
ENSMUSG00000060802	B2m	1.21927	11.8129	23.3684	1.33758e-06	2.52761e-05
ENSMUSG00000041774	Ydjc	1.21937	2.56586	13.9829	0.000184485	0.00196175
ENSMUSG00000045328	Cenpe	1.2195	1.60997	7.11118	0.00766046	0.0425282
ENSMUSG00000083307	AA414768	1.22084	1.85997	11.1653	0.000833401	0.00692974
ENSMUSG00000051065	Mb21d2	1.2212	2.60545	18.6104	1.60344e-05	0.000233879
ENSMUSG00000052459	Atp6v1a	1.22552	6.71121	53.433	2.67566e-13	1.37338e-11
ENSMUSG00000080859	Rpl10-ps1	1.22574	3.05986	13.5295	0.000234843	0.00237469
ENSMUSG00000012443	Kif11	1.22994	1.75143	11.3021	0.000774201	0.00651788
ENSMUSG00000017404	Rpl19	1.23059	8.97876	22.973	1.64296e-06	3.01629e-05
ENSMUSG00000018102	Hist1h2bc	1.23191	4.87767	16.8013	4.15048e-05	0.000545818
ENSMUSG00000022769	Sdf2l1	1.23192	7.242	25.1273	5.36685e-07	1.10419e-05
ENSMUSG00000031425	Plp1	1.23282	5.8012	15.4326	8.55015e-05	0.00100901
ENSMUSG00000061175	Fnip2	1.23327	6.69281	47.2045	6.39527e-12	2.79022e-10
ENSMUSG00000094989	Rpl9-ps4	1.2334	4.01245	19.6332	9.38263e-06	0.000144566
ENSMUSG00000060438	Rps10-ps1	1.23533	3.11459	12.939	0.000321812	0.00308782
ENSMUSG00000036181	Hist1h1c	1.23563	5.65181	22.7998	1.79784e-06	3.2723e-05
ENSMUSG00000019823	Mical1	1.23713	5.64862	49	2.55966e-12	1.15762e-10
ENSMUSG00000060260	Pwwp2b	1.2373	4.33941	32.8575	9.91699e-09	2.90728e-07
ENSMUSG00000040209	Zfp704	1.24014	4.86372	23.1479	1.50007e-06	2.79197e-05
ENSMUSG00000110631	Gm42047	1.24178	4.39585	10.4896	0.00120049	0.00945626
ENSMUSG00000030747	Dgat2	1.24193	1.93738	8.06012	0.00452502	0.0279219
ENSMUSG00000113625	Gm3379	1.24308	1.72701	8.17492	0.00424736	0.0265286
ENSMUSG00000035929	H2-Q4	1.24332	6.47275	31.3899	2.11073e-08	5.89184e-07
ENSMUSG00000081049	Rps24-ps3	1.24457	1.68435	8.94443	0.00278317	0.0188175
ENSMUSG00000063882	Uqcrh	1.24647	6.63639	25.391	4.68086e-07	9.83512e-06
ENSMUSG00000071415	Rpl23	1.24694	8.71253	25.8682	3.65534e-07	7.82443e-06
ENSMUSG00000039782	Cpeb2	1.24712	6.56121	26.7385	2.32928e-07	5.18029e-06
ENSMUSG00000000555	Itga5	1.24837	6.21164	68.3179	1.39153e-16	1.02697e-14
ENSMUSG00000001918	Slc1a5	1.24844	3.57312	25.5178	4.38326e-07	9.24912e-06
ENSMUSG00000030683	Sez6l2	1.25052	3.32599	14.408	0.000147179	0.00161483
ENSMUSG00000026478	Lamc1	1.25285	4.45301	37.0973	1.12379e-09	3.81471e-08
ENSMUSG00000038859	Baiap2l1	1.25298	2.21434	8.66095	0.00325102	0.0213423
ENSMUSG00000090136	Gm10177	1.25594	3.07992	12.0772	0.000510428	0.00458058
ENSMUSG00000059461	Gm7331	1.25934	3.19871	13.5553	0.000231639	0.00235352
ENSMUSG00000070000	Fcho1	1.26062	2.0336	7.60265	0.00582826	0.0341725
ENSMUSG00000028518	Prkaa2	1.26413	1.81042	9.65079	0.0018927	0.0137218
ENSMUSG00000073555	Gm4951	1.26441	2.79116	20.1194	7.27552e-06	0.000116173
ENSMUSG00000082536	Gm13456	1.26561	5.23826	35.0951	3.13986e-09	1.00381e-07
ENSMUSG00000024610	Cd74	1.26597	10.1144	13.4242	0.000248399	0.00248299
ENSMUSG00000032518	Rpsa	1.26786	9.55636	26.8908	2.1528e-07	4.83859e-06
ENSMUSG00000075268	Gm10819	1.26881	1.69497	7.39936	0.00652471	0.0373697
ENSMUSG00000083394	Gm11703	1.27097	3.34382	16.6962	4.38688e-05	0.00057436
ENSMUSG00000003518	Dusp3	1.27349	5.94335	40.0863	2.42982e-10	8.85599e-09
ENSMUSG00000043542	Zc2hc1a	1.27746	2.29155	16.2906	5.43329e-05	0.000684189
ENSMUSG00000037411	Serpine1	1.27774	5.10419	49.1324	2.39251e-12	1.08867e-10
ENSMUSG00000005054	Cstb	1.27775	5.8751	27.8221	1.32998e-07	3.12661e-06
ENSMUSG00000025059	Gk	1.27896	3.49186	28.1574	1.11837e-07	2.69316e-06
ENSMUSG00000026335	Pam	1.2796	1.8966	9.98252	0.00158033	0.0117625
ENSMUSG00000082088	Gm15753	1.28335	2.34717	11.5114	0.0006917	0.00593665
ENSMUSG00000006219	Fblim1	1.28341	5.87908	54.796	1.33709e-13	7.12716e-12
ENSMUSG00000026207	Speg	1.28439	6.19528	50.2314	1.36641e-12	6.45519e-11
ENSMUSG00000015396	Cd83	1.28534	7.96837	66.7855	3.02714e-16	2.12818e-14
ENSMUSG00000020256	Aldh1l2	1.28608	2.40856	7.55561	0.00598235	0.0348687
ENSMUSG00000056153	Socs6	1.28685	6.27539	53.6775	2.36248e-13	1.22535e-11
ENSMUSG00000106574	Gm2451	1.28784	0.753627	6.86422	0.00879386	0.0475394
ENSMUSG00000044468	Tent5c	1.28787	8.26853	56.718	5.03009e-14	2.84795e-12
ENSMUSG00000113061	Gm11361	1.29003	2.93263	16.3523	5.25922e-05	0.000670397
ENSMUSG00000068923	Syt11	1.29022	5.63251	51.1274	8.65612e-13	4.25182e-11
ENSMUSG00000054051	Ercc6	1.29588	4.50489	25.193	5.18701e-07	1.07765e-05
ENSMUSG00000024873	Cnih2	1.29825	0.738582	7.01657	0.00807586	0.0443366
ENSMUSG00000040710	St8sia4	1.30138	5.00091	22.7468	1.84813e-06	3.35559e-05
ENSMUSG00000033542	Arhgef5	1.30202	2.18066	13.6677	0.000218172	0.00225217
ENSMUSG00000078606	Gm4070	1.30246	3.41118	14.9876	0.000108218	0.00123864
ENSMUSG00000044080	S100a1	1.30423	3.93697	21.331	3.86431e-06	6.58131e-05
ENSMUSG00000002233	Rhoc	1.30476	5.5486	29.0194	7.16573e-08	1.79555e-06
ENSMUSG00000037905	Bri3bp	1.30537	5.24287	54.8445	1.30453e-13	6.98606e-12
ENSMUSG00000068397	Gm10240	1.30658	1.12713	9.36379	0.00221314	0.0156245
ENSMUSG00000067288	Rps28	1.30662	7.64296	20.4391	6.15595e-06	9.99096e-05
ENSMUSG00000042804	Gpr153	1.30683	0.943695	7.06345	0.00786724	0.0434323
ENSMUSG00000047676	Rpsa-ps10	1.31304	5.37718	29.8585	4.6475e-08	1.21804e-06
ENSMUSG00000024164	C3	1.31441	4.21046	23.05	1.57841e-06	2.91583e-05
ENSMUSG00000107176	Gm9794	1.31574	7.63131	27.1981	1.83637e-07	4.18445e-06
ENSMUSG00000015340	Cybb	1.31584	6.42958	43.7234	3.78222e-11	1.54136e-09
ENSMUSG00000083773	Gm13394	1.31625	1.63899	10.3894	0.00126744	0.00985904
ENSMUSG00000045294	Insig1	1.31705	4.74829	33.3078	7.86678e-09	2.36163e-07
ENSMUSG00000028063	Lmna	1.31764	3.77612	16.2803	5.46294e-05	0.000687339
ENSMUSG00000062488	Ifit3b	1.31972	2.90071	16.8369	4.07331e-05	0.000537576
ENSMUSG00000004709	Cd244a	1.31988	3.26791	14.973	0.00010906	0.00124542
ENSMUSG00000110686	Gm45855	1.32122	3.15532	15.1865	9.73962e-05	0.00112873
ENSMUSG00000026819	Slc25a25	1.32685	5.60837	52.8877	3.53179e-13	1.80036e-11
ENSMUSG00000099974	Bcl2a1d	1.32693	3.64443	19.1083	1.23506e-05	0.000185059
ENSMUSG00000025232	Hexa	1.32737	10.7	44.4116	2.6611e-11	1.09348e-09
ENSMUSG00000020695	Mrc2	1.32867	7.82358	58.0132	2.60369e-14	1.51463e-12
ENSMUSG00000013698	Pea15a	1.33082	8.34327	72.8398	1.40614e-17	1.17846e-15
ENSMUSG00000041390	Mdfic	1.33116	4.25726	41.9738	9.25044e-11	3.53662e-09
ENSMUSG00000058173	Smco4	1.33122	2.1412	14.0292	0.000179997	0.00192092
ENSMUSG00000081603	Gm14681	1.33366	2.51438	15.5391	8.0815e-05	0.000959048
ENSMUSG00000056413	Adap1	1.3407	6.32203	47.039	6.95894e-12	3.01839e-10
ENSMUSG00000021242	Npc2	1.341	10.12	40.7275	1.75007e-10	6.47393e-09
ENSMUSG00000040658	Dnph1	1.34153	1.11183	8.33518	0.00388845	0.0246607
ENSMUSG00000020821	Kif1c	1.34715	6.02247	68.0911	1.5611e-16	1.14076e-14
ENSMUSG00000016256	Ctsz	1.34725	11.5657	30.3035	3.69451e-08	9.80401e-07
ENSMUSG00000035376	Hacd2	1.34903	5.86319	58.7078	1.82911e-14	1.08532e-12
ENSMUSG00000039013	Siglecf	1.34904	6.11346	69.2161	8.82437e-17	6.74746e-15
ENSMUSG00000036427	Gpi1	1.34957	8.31898	49.1048	2.42644e-12	1.10073e-10
ENSMUSG00000022463	Srebf2	1.35096	6.59777	77.4057	1.39214e-18	1.28268e-16
ENSMUSG00000064360	mt-Nd3	1.35623	2.45273	13.2955	0.000266042	0.0026382
ENSMUSG00000025498	Irf7	1.35849	4.92994	23.1889	1.46839e-06	2.74334e-05
ENSMUSG00000031799	Tpm4	1.35867	6.04978	63.0406	2.02485e-15	1.32906e-13
ENSMUSG00000040528	Milr1	1.35951	5.4112	45.5589	1.48114e-11	6.22414e-10
ENSMUSG00000038028	Tigar	1.35979	3.57956	29.3739	5.96745e-08	1.52098e-06
ENSMUSG00000063889	Crem	1.35991	3.12844	23.8603	1.03584e-06	2.00073e-05
ENSMUSG00000029822	Osbpl3	1.36034	4.36677	45.9593	1.20735e-11	5.17624e-10
ENSMUSG00000032369	Plscr1	1.36208	2.22636	14.9804	0.000108635	0.00124152
ENSMUSG00000083496	Gm11263	1.36245	3.85398	17.3822	3.05672e-05	0.000417143
ENSMUSG00000023067	Cdkn1a	1.36364	4.56401	34.6576	3.93094e-09	1.2328e-07
ENSMUSG00000058385	Hist1h2bg	1.36728	2.38707	11.7165	0.000619469	0.00541816
ENSMUSG00000080848	Gm9385	1.36797	1.63157	8.65932	0.00325393	0.0213456
ENSMUSG00000001783	Rtcb	1.36998	7.66304	73.8221	8.54828e-18	7.32978e-16
ENSMUSG00000061833	Gm6311	1.37005	1.26548	8.00738	0.00465871	0.028604
ENSMUSG00000020654	Adcy3	1.3703	3.87739	22.0596	2.64315e-06	4.66213e-05
ENSMUSG00000037370	Enpp1	1.37062	4.64643	54.1135	1.89233e-13	9.95421e-12
ENSMUSG00000071052	Rpl7a-ps5	1.37092	4.81365	19.7369	8.88679e-06	0.000138328
ENSMUSG00000063229	Ldha	1.37141	8.10898	50.5747	1.14712e-12	5.48914e-11
ENSMUSG00000091957	Rps2-ps10	1.37417	1.96189	12.6859	0.000368416	0.00346329
ENSMUSG00000056313	Tcim	1.37447	3.72895	32.4683	1.21155e-08	3.51704e-07
ENSMUSG00000081281	Gm6274	1.37531	1.34449	7.61562	0.00578647	0.0339941
ENSMUSG00000026806	Ddx31	1.37558	5.94267	69.5883	7.30695e-17	5.61613e-15
ENSMUSG00000036390	Gadd45a	1.37582	1.68888	7.73089	0.00542839	0.0323262
ENSMUSG00000061533	Cep128	1.37908	1.85563	11.1831	0.000825463	0.00688627
ENSMUSG00000026827	Gpd2	1.3802	3.48087	34.0192	5.45721e-09	1.68651e-07
ENSMUSG00000109675	Nxpe1-ps	1.38051	1.128	9.33035	0.0022539	0.0158757
ENSMUSG00000041736	Tspo	1.38087	6.38999	25.1808	5.22002e-07	1.07997e-05
ENSMUSG00000090516	Rps11-ps1	1.38151	2.11867	13.9149	0.000191279	0.00202096
ENSMUSG00000111394	AC160637.1	1.38329	4.23819	12.1136	0.000500561	0.00450292
ENSMUSG00000019843	Fyn	1.38373	4.9872	54.5203	1.53854e-13	8.15095e-12
ENSMUSG00000024661	Fth1	1.38439	11.1094	26.8741	2.17149e-07	4.8585e-06
ENSMUSG00000104802	Gm5869	1.38491	1.56741	12.9729	0.000316024	0.00304805
ENSMUSG00000054072	Iigp1	1.38526	2.62467	13.3571	0.000257445	0.00256305
ENSMUSG00000009687	Fxyd5	1.38595	5.50865	22.89	1.71545e-06	3.13001e-05
ENSMUSG00000020460	Rps27a	1.38868	8.23029	19.5056	1.00304e-05	0.000153551
ENSMUSG00000025875	Tspan17	1.3896	2.61172	19.7002	9.05931e-06	0.000140571
ENSMUSG00000072949	Acot1	1.3902	1.30433	8.70409	0.00317497	0.0209143
ENSMUSG00000057696	Rpl30-ps1	1.39163	0.784641	7.49736	0.00617896	0.0356926
ENSMUSG00000020057	Dram1	1.39361	2.07417	7.28526	0.00695226	0.0393827
ENSMUSG00000030695	Aldoa	1.39758	9.6366	38.7477	4.82285e-10	1.70745e-08
ENSMUSG00000074212	Dnajb14	1.40003	7.1117	81.5003	1.75235e-19	1.74459e-17
ENSMUSG00000032988	Slc16a8	1.40138	2.10268	7.80119	0.00522118	0.0312428
ENSMUSG00000048142	Nat8l	1.40144	5.58256	71.4931	2.78228e-17	2.25532e-15
ENSMUSG00000045055	Rpsa-ps2	1.40473	2.38557	15.5539	8.01848e-05	0.000952331
ENSMUSG00000027239	Mdk	1.40759	2.43015	9.70319	0.00183949	0.0134418
ENSMUSG00000024665	Fads2	1.41074	1.99206	11.9744	0.000539372	0.00480543
ENSMUSG00000058799	Nap1l1	1.41177	6.39149	77.3833	1.40804e-18	1.28931e-16
ENSMUSG00000034853	Acot11	1.4126	2.3276	18.7486	1.49132e-05	0.000219685
ENSMUSG00000024942	Capn1	1.41456	4.41663	36.4164	1.59356e-09	5.28834e-08
ENSMUSG00000081559	Gm12411	1.41552	2.69045	9.00464	0.00269295	0.0183328
ENSMUSG00000042712	Tceal9	1.4157	4.7822	34.1093	5.21021e-09	1.61353e-07
ENSMUSG00000045594	Glb1	1.41812	7.60838	78.4035	8.40038e-19	7.88679e-17
ENSMUSG00000066487	Gm5786	1.41975	0.685249	7.8623	0.00504761	0.0304746
ENSMUSG00000055013	Agap1	1.42144	4.54256	50.7783	1.03413e-12	5.01317e-11
ENSMUSG00000037225	Fgf2	1.42252	4.45399	26.3912	2.78801e-07	6.09093e-06
ENSMUSG00000032997	Chpf	1.4236	0.793847	7.90302	0.00493523	0.0299179
ENSMUSG00000024302	Dtna	1.42504	1.90295	8.21906	0.00414527	0.0260224
ENSMUSG00000022237	Ankrd33b	1.42639	0.587735	6.884	0.00869706	0.0470847
ENSMUSG00000032959	Pebp1	1.42885	6.69492	37.6576	8.43154e-10	2.90194e-08
ENSMUSG00000025492	Ifitm3	1.42909	6.4125	18.5313	1.67133e-05	0.000241643
ENSMUSG00000038375	Trp53inp2	1.43002	5.13346	55.4539	9.56751e-14	5.276e-12
ENSMUSG00000041688	Amot	1.43263	0.690908	7.53463	0.00605241	0.0351395
ENSMUSG00000024697	Gna14	1.43774	0.677848	8.13413	0.00434397	0.0270295
ENSMUSG00000072825	Cep170b	1.44275	1.96144	9.05868	0.00261451	0.0179165
ENSMUSG00000034926	Dhcr24	1.44595	2.8536	9.46769	0.00209123	0.0148926
ENSMUSG00000020900	Myh10	1.44886	4.72698	57.0788	4.18689e-14	2.398e-12
ENSMUSG00000048148	Nwd1	1.45005	1.83002	8.42523	0.00370049	0.023671
ENSMUSG00000025161	Slc16a3	1.45072	7.04235	72.878	1.3792e-17	1.16909e-15
ENSMUSG00000036158	Prickle1	1.45091	3.81793	33.034	9.05622e-09	2.69759e-07
ENSMUSG00000082016	Pgam1-ps2	1.45226	0.523557	7.479	0.00624228	0.0360023
ENSMUSG00000093674	Rpl41	1.45389	9.44143	24.0241	9.51356e-07	1.84717e-05
ENSMUSG00000020638	Cmpk2	1.45394	2.88449	18.6965	1.53266e-05	0.00022481
ENSMUSG00000061232	H2-K1	1.45844	10.1441	35.078	3.16751e-09	1.01047e-07
ENSMUSG00000033579	Fa2h	1.45947	1.21735	7.69651	0.00553278	0.0328162
ENSMUSG00000044986	Tst	1.46307	1.58742	11.3879	0.000739238	0.00628056
ENSMUSG00000026536	Ifi211	1.46433	2.71719	27.3496	1.69803e-07	3.9052e-06
ENSMUSG00000032076	Cadm1	1.46488	8.15299	91.92	9.025e-22	1.06287e-19
ENSMUSG00000059159	Gm8129	1.46765	3.13291	14.4198	0.000146255	0.00160588
ENSMUSG00000032802	Srxn1	1.47005	2.90731	24.1494	8.91437e-07	1.74454e-05
ENSMUSG00000072940	Gm10443	1.47295	4.4341	21.3081	3.91075e-06	6.65276e-05
ENSMUSG00000029103	Lrpap1	1.47318	7.99902	67.0798	2.60742e-16	1.85065e-14
ENSMUSG00000028874	Fgr	1.47344	5.06103	56.2048	6.53006e-14	3.68315e-12
ENSMUSG00000062328	Rpl17	1.47739	7.08005	23.5183	1.23733e-06	2.35616e-05
ENSMUSG00000025738	Fbxl16	1.47881	1.75347	10.4794	0.00120716	0.00948968
ENSMUSG00000020914	Top2a	1.48216	3.45947	36.8275	1.29055e-09	4.35092e-08
ENSMUSG00000022995	Enah	1.48446	2.50308	14.9871	0.000108247	0.00123864
ENSMUSG00000028494	Plin2	1.48466	5.87734	67.3754	2.24434e-16	1.61614e-14
ENSMUSG00000116757	AC121151.1	1.48494	3.67477	18.1231	2.07073e-05	0.000293383
ENSMUSG00000032530	Lyzl4	1.48623	3.10942	16.4269	5.05635e-05	0.00064884
ENSMUSG00000058258	Idi1	1.49046	1.70809	8.91665	0.00282582	0.0190447
ENSMUSG00000019942	Cdk1	1.49175	3.30208	19.12	1.22753e-05	0.00018449
ENSMUSG00000027935	Rab13	1.49196	0.839641	7.50206	0.00616283	0.0356272
ENSMUSG00000030579	Tyrobp	1.49266	10.6554	35.7327	2.26329e-09	7.39507e-08
ENSMUSG00000031647	Mfap3l	1.49448	2.93425	31.2865	2.22626e-08	6.17278e-07
ENSMUSG00000025289	Prdx4	1.50085	5.99879	51.0547	8.9828e-13	4.39772e-11
ENSMUSG00000061684	Rpl21-ps8	1.50702	2.96407	23.0329	1.5925e-06	2.93456e-05
ENSMUSG00000066456	Hmgn3	1.5078	3.95239	31.8228	1.689e-08	4.77681e-07
ENSMUSG00000110057	Gm2225	1.51186	1.57733	12.2586	0.000463114	0.00421044
ENSMUSG00000038523	1700003F12Rik	1.51268	3.25577	18.6441	1.57538e-05	0.000230238
ENSMUSG00000006931	P3h4	1.51484	3.36794	17.8884	2.34245e-05	0.00032812
ENSMUSG00000039081	Zfp503	1.51927	1.30231	8.52506	0.0035029	0.0226414
ENSMUSG00000104913	Gm6560	1.52348	2.91458	28.9781	7.3201e-08	1.83114e-06
ENSMUSG00000074896	Ifit3	1.525	5.21226	38.1774	6.45964e-10	2.25464e-08
ENSMUSG00000095524	Gm15682	1.52557	2.11631	11.5351	0.000682946	0.00586886
ENSMUSG00000063286	Gm8995	1.52697	7.22272	22.3067	2.32398e-06	4.15349e-05
ENSMUSG00000069516	Lyz2	1.52939	10.622	41.9226	9.49599e-11	3.62117e-09
ENSMUSG00000091712	Sec14l5	1.52968	0.961795	7.05691	0.00789601	0.0435587
ENSMUSG00000039899	Fgl2	1.53154	5.61858	55.777	8.11776e-14	4.51007e-12
ENSMUSG00000023805	Synj2	1.53255	5.08342	58.0899	2.50413e-14	1.46823e-12
ENSMUSG00000053931	Cnn3	1.53346	3.15405	17.2214	3.32675e-05	0.000447407
ENSMUSG00000027750	Postn	1.53479	3.75743	37.296	1.01495e-09	3.46907e-08
ENSMUSG00000025534	Gusb	1.53768	9.25915	85.4763	2.345e-20	2.46707e-18
ENSMUSG00000038539	Atf5	1.54512	4.13137	18.7629	1.4802e-05	0.000218264
ENSMUSG00000018411	Mapt	1.54738	2.68449	17.9175	2.30687e-05	0.000323442
ENSMUSG00000024998	Plce1	1.55118	1.2236	11.4766	0.000704783	0.00603972
ENSMUSG00000025867	Cplx2	1.5536	2.45844	14.81	0.000118906	0.00134236
ENSMUSG00000029608	Rph3a	1.55439	0.705301	7.95445	0.00479693	0.0292589
ENSMUSG00000053550	Shisa7	1.5553	3.30588	23.7352	1.10544e-06	2.12411e-05
ENSMUSG00000006360	Crip1	1.556	4.70012	22.0188	2.69997e-06	4.75105e-05
ENSMUSG00000034317	Trim59	1.55712	1.45076	10.3179	0.00131747	0.0101788
ENSMUSG00000083087	Gm11249	1.55822	1.52444	9.87213	0.00167801	0.01239
ENSMUSG00000043079	Synpo	1.56037	2.22485	13.92	0.000190756	0.00201832
ENSMUSG00000038679	Trps1	1.56122	3.1336	20.2153	6.91983e-06	0.000110972
ENSMUSG00000066632	Pgk1-rs7	1.56144	0.967875	12.4481	0.000418422	0.0038624
ENSMUSG00000027254	Map1a	1.56291	1.77604	11.5665	0.000671511	0.00578803
ENSMUSG00000045382	Cxcr4	1.56466	4.37307	27.8396	1.31803e-07	3.11333e-06
ENSMUSG00000029309	Sparcl1	1.56529	5.61382	15.9607	6.46713e-05	0.000796128
ENSMUSG00000109237	9130214F15Rik	1.56613	0.908693	8.81303	0.00299086	0.0199489
ENSMUSG00000041607	Mbp	1.56727	6.9348	48.2202	3.80936e-12	1.69186e-10
ENSMUSG00000022021	Diaph3	1.56922	0.299463	6.92674	0.00849161	0.0461409
ENSMUSG00000028412	Slc44a1	1.57085	6.0983	99.6439	1.82412e-23	2.35295e-21
ENSMUSG00000030730	Atp2a1	1.57231	0.595767	7.50332	0.00615853	0.0356162
ENSMUSG00000021477	Ctsl	1.57361	10.7302	62.0977	3.26838e-15	2.09884e-13
ENSMUSG00000063193	Cd300lb	1.57484	2.89137	23.2488	1.42343e-06	2.66269e-05
ENSMUSG00000079445	B3gnt7	1.58054	3.29494	26.6112	2.48792e-07	5.47565e-06
ENSMUSG00000002341	Ncan	1.58395	0.998498	7.89846	0.00494768	0.0299646
ENSMUSG00000041827	Oasl1	1.58637	2.3509	13.4721	0.000242131	0.0024351
ENSMUSG00000064349	mt-Tc	1.58842	2.20606	15.7373	7.27754e-05	0.00087697
ENSMUSG00000025203	Scd2	1.59015	7.9077	99.1386	2.35435e-23	3.01072e-21
ENSMUSG00000056888	Glipr1	1.59502	4.28257	48.7577	2.89618e-12	1.30583e-10
ENSMUSG00000026249	Serpine2	1.5969	10.1252	82.7907	9.12199e-20	9.39692e-18
ENSMUSG00000027230	Creb3l1	1.5988	2.47864	13.8472	0.000198291	0.00208023
ENSMUSG00000034612	Chst11	1.60029	6.75471	89.346	3.31456e-21	3.66926e-19
ENSMUSG00000016239	Lonrf3	1.60508	4.31166	14.0981	0.000173522	0.00185985
ENSMUSG00000037849	Ifi206	1.60573	2.26671	25.2879	4.93803e-07	1.03025e-05
ENSMUSG00000035666	Gtf3c4	1.60641	6.51282	79.2864	5.3729e-19	5.10907e-17
ENSMUSG00000056498	Tmem154	1.607	3.86651	34.8411	3.57738e-09	1.13149e-07
ENSMUSG00000019851	Perp	1.60783	3.22879	24.5396	7.27996e-07	1.4554e-05
ENSMUSG00000084616	Gm25047	1.60904	1.76579	7.52452	0.00608647	0.0353096
ENSMUSG00000021886	Gpr65	1.61139	4.81527	58.0528	2.55173e-14	1.49025e-12
ENSMUSG00000039904	Gpr37	1.61295	1.69484	7.00643	0.00812173	0.0445225
ENSMUSG00000064043	Trerf1	1.62054	2.25404	19.9029	8.14759e-06	0.000128303
ENSMUSG00000037638	Zbtb42	1.62214	1.85631	16.1109	5.97393e-05	0.000741567
ENSMUSG00000056145	AI504432	1.62293	3.7896	27.4967	1.5736e-07	3.6303e-06
ENSMUSG00000029640	Usp12	1.62638	7.42599	48.4985	3.30542e-12	1.48135e-10
ENSMUSG00000028871	Rspo1	1.63558	2.74111	20.9998	4.59322e-06	7.69028e-05
ENSMUSG00000028028	Alpk1	1.63636	3.95278	21.1821	4.17636e-06	7.05605e-05
ENSMUSG00000052920	Prkg1	1.63661	2.05561	15.8624	6.81171e-05	0.000829597
ENSMUSG00000025352	Gdf11	1.64106	0.616792	7.26197	0.00704299	0.0397397
ENSMUSG00000057329	Bcl2	1.64631	4.41158	39.0103	4.21566e-10	1.50325e-08
ENSMUSG00000021360	Gcnt2	1.64778	5.46306	81.2157	2.02382e-19	1.99416e-17
ENSMUSG00000037868	Egr2	1.64848	4.76889	72.5229	1.65107e-17	1.37596e-15
ENSMUSG00000027580	Helz2	1.64855	4.06515	32.9492	9.45973e-09	2.78977e-07
ENSMUSG00000038179	Slamf7	1.6488	3.0409	23.0529	1.57605e-06	2.9151e-05
ENSMUSG00000019528	Gyg	1.64906	5.60611	71.8793	2.28766e-17	1.87487e-15
ENSMUSG00000064339	mt-Rnr2	1.65136	8.31308	51.6449	6.65017e-13	3.3215e-11
ENSMUSG00000037996	Slc24a2	1.65193	1.24215	8.10599	0.00441193	0.0273618
ENSMUSG00000008734	Gprc5b	1.65802	2.91159	17.1227	3.50407e-05	0.000469976
ENSMUSG00000029207	Apbb2	1.65843	6.24756	95.499	1.47966e-22	1.84447e-20
ENSMUSG00000045868	Gvin1	1.65936	3.00957	12.9512	0.000319725	0.00307375
ENSMUSG00000060377	Rpl36a-ps1	1.66099	0.271073	8.64956	0.00327141	0.0214252
ENSMUSG00000036875	Dna2	1.66298	3.96331	29.0218	7.15681e-08	1.79555e-06
ENSMUSG00000084314	Rps15a-ps3	1.66663	0.304914	8.02536	0.00461267	0.0283683
ENSMUSG00000030325	Klrb1c	1.66835	0.994846	11.117	0.000855391	0.00708479
ENSMUSG00000007891	Ctsd	1.67535	13.7757	42.7281	6.29027e-11	2.462e-09
ENSMUSG00000040564	Apoc1	1.6759	0.965885	8.03485	0.00458858	0.0282318
ENSMUSG00000039278	Pcsk1n	1.67772	2.20017	13.0079	0.00031018	0.00300733
ENSMUSG00000025810	Nrp1	1.6779	7.45378	67.1339	2.53683e-16	1.8092e-14
ENSMUSG00000069792	Wfdc17	1.67802	4.65726	50.1843	1.39962e-12	6.51604e-11
ENSMUSG00000024378	Stard4	1.68807	3.28745	24.2556	8.43626e-07	1.65973e-05
ENSMUSG00000075611	Gm11545	1.68812	2.24016	20.379	6.3523e-06	0.000102871
ENSMUSG00000040260	Daam2	1.68838	2.57591	24.1457	8.93134e-07	1.74555e-05
ENSMUSG00000097855	A930007I19Rik	1.68958	1.47829	15.5055	8.22648e-05	0.000973139
ENSMUSG00000001467	Cyp51	1.69207	4.54719	67.9878	1.64507e-16	1.19622e-14
ENSMUSG00000025190	Got1	1.69321	6.23434	85.2916	2.57448e-20	2.68943e-18
ENSMUSG00000038552	Fndc4	1.69751	2.87492	28.4262	9.73386e-08	2.37097e-06
ENSMUSG00000020330	Hmmr	1.70097	1.06109	11.5962	0.000660877	0.00571646
ENSMUSG00000058897	Col25a1	1.70348	1.28132	11.6741	0.000633761	0.00551391
ENSMUSG00000033595	Lgi3	1.70585	1.99176	11.3797	0.000742513	0.00630116
ENSMUSG00000035311	Gnptab	1.71553	6.00205	103.258	2.94268e-24	4.04182e-22
ENSMUSG00000004902	Slc25a18	1.71587	1.21555	8.49975	0.00355196	0.0228887
ENSMUSG00000074785	Plxnc1	1.71661	3.11202	27.9324	1.25625e-07	3.00085e-06
ENSMUSG00000021939	Ctsb	1.72331	12.6591	68.4167	1.32351e-16	9.86582e-15
ENSMUSG00000003363	Pld3	1.72923	9.22911	68.6983	1.14739e-16	8.72841e-15
ENSMUSG00000049723	Mmp12	1.73069	2.73598	23.0791	1.55468e-06	2.88277e-05
ENSMUSG00000054871	Tmem158	1.7325	1.05383	9.89184	0.00166014	0.0122703
ENSMUSG00000032294	Pkm	1.73311	9.49198	82.2148	1.22071e-19	1.24883e-17
ENSMUSG00000072572	Slc39a2	1.74277	1.26916	11.365	0.000748431	0.00634413
ENSMUSG00000023951	Vegfa	1.74516	3.26493	36.693	1.38278e-09	4.64076e-08
ENSMUSG00000022010	Tsc22d1	1.74783	6.05034	61.6455	4.11211e-15	2.60679e-13
ENSMUSG00000024411	Aqp4	1.75351	1.29739	9.67429	0.00186864	0.013608
ENSMUSG00000034488	Edil3	1.75688	1.1083	11.0084	0.000906988	0.0074374
ENSMUSG00000016427	Ndufa1	1.76019	5.29546	35.7632	2.22823e-09	7.29658e-08
ENSMUSG00000044703	Phf11a	1.77361	2.47355	19.7838	8.67134e-06	0.000135828
ENSMUSG00000079037	Prnp	1.77482	4.2885	33.7747	6.18773e-09	1.88478e-07
ENSMUSG00000021057	Akap5	1.78077	3.48112	32.9929	9.24969e-09	2.73872e-07
ENSMUSG00000038331	Satb2	1.78765	1.99275	18.0413	2.16161e-05	0.000304513
ENSMUSG00000048978	Nrsn1	1.7889	0.293865	7.74624	0.00538243	0.0321042
ENSMUSG00000105748	Gm43088	1.79347	1.9685	25.3216	4.8524e-07	1.01381e-05
ENSMUSG00000068748	Ptprz1	1.80054	1.57843	11.0574	0.000883335	0.00727966
ENSMUSG00000056215	Lrguk	1.80323	4.24957	31.8985	1.62444e-08	4.62514e-07
ENSMUSG00000036402	Gng12	1.80504	6.9574	130.64	2.96767e-30	5.50281e-28
ENSMUSG00000004891	Nes	1.80554	4.48635	58.2289	2.33331e-14	1.37351e-12
ENSMUSG00000032231	Anxa2	1.81134	5.38601	38.4268	5.68476e-10	1.99356e-08
ENSMUSG00000018800	Abca5	1.81153	2.01873	20.0512	7.5398e-06	0.000119493
ENSMUSG00000050335	Lgals3	1.81707	5.54914	33.0475	8.99335e-09	2.68425e-07
ENSMUSG00000034714	Ttyh2	1.82062	4.67399	71.67	2.54374e-17	2.07329e-15
ENSMUSG00000048022	Tmem229a	1.8277	1.66658	13.7459	0.000209274	0.00217393
ENSMUSG00000048965	Mrgpre	1.83015	4.59889	94.6779	2.24023e-22	2.7693e-20
ENSMUSG00000035284	Vps13c	1.83133	6.07672	17.3923	3.04049e-05	0.000415692
ENSMUSG00000023456	Tpi1	1.8338	7.92505	66.85	2.92968e-16	2.06947e-14
ENSMUSG00000097572	Gm26797	1.83628	0.48043	8.90492	0.00284404	0.0191418
ENSMUSG00000064337	mt-Rnr1	1.83742	7.4752	35.5257	2.51713e-09	8.17049e-08
ENSMUSG00000040811	Eml2	1.8375	3.38274	37.7378	8.09212e-10	2.79159e-08
ENSMUSG00000085939	Cd63-ps	1.83806	5.67154	59.512	1.21552e-14	7.48177e-13
ENSMUSG00000033316	Galnt9	1.84451	0.644934	11.2699	0.00078776	0.00661326
ENSMUSG00000026958	Dpp7	1.84849	7.1185	106.887	4.71357e-25	6.99212e-23
ENSMUSG00000032841	Prr5l	1.85102	4.20939	68.1491	1.51588e-16	1.11319e-14
ENSMUSG00000047881	Rell1	1.85163	4.14966	79.0145	6.16548e-19	5.82539e-17
ENSMUSG00000054793	Cadm4	1.85206	3.62011	38.1398	6.5853e-10	2.28774e-08
ENSMUSG00000004707	Ly9	1.85638	6.94602	162.282	3.59032e-37	9.18254e-35
ENSMUSG00000026981	Il1rn	1.86406	1.50514	14.1637	0.000167575	0.00180918
ENSMUSG00000000682	Cd52	1.86828	7.50912	67.3044	2.32658e-16	1.66727e-14
ENSMUSG00000025006	Sorbs1	1.8806	1.8878	19.1924	1.1818e-05	0.000178778
ENSMUSG00000038776	Ephx1	1.88155	6.54418	103.525	2.57163e-24	3.5652e-22
ENSMUSG00000103174	Gm37168	1.88519	2.11082	20.9252	4.77558e-06	7.96861e-05
ENSMUSG00000025351	Cd63	1.88808	9.15347	55.9009	7.62188e-14	4.25049e-12
ENSMUSG00000073411	H2-D1	1.89529	10.6715	60.8436	6.17941e-15	3.88413e-13
ENSMUSG00000019699	Akt3	1.89751	5.13723	50.0358	1.50969e-12	6.99837e-11
ENSMUSG00000028019	Pdgfc	1.90129	2.44719	32.4539	1.22055e-08	3.53627e-07
ENSMUSG00000074151	Nlrc5	1.90215	4.92439	59.9086	9.93672e-15	6.14172e-13
ENSMUSG00000027699	Ect2	1.90321	0.76898	15.0614	0.00010407	0.00119673
ENSMUSG00000057880	Abat	1.90772	2.78097	23.0128	1.60923e-06	2.96171e-05
ENSMUSG00000018341	Il12rb2	1.91537	1.36978	12.0387	0.000521079	0.00465644
ENSMUSG00000071068	Treml2	1.91807	5.21775	126.288	2.65974e-29	4.81153e-27
ENSMUSG00000062070	Pgk1	1.92043	7.07154	129.922	4.26282e-30	7.80675e-28
ENSMUSG00000052013	Btla	1.92806	2.01202	15.9536	6.49142e-05	0.000798456
ENSMUSG00000045932	Ifit2	1.92866	5.04818	74.1653	7.18405e-18	6.19582e-16
ENSMUSG00000027523	Gnas	1.93221	6.41086	76.769	1.92174e-18	1.72771e-16
ENSMUSG00000027712	Anxa5	1.93488	7.20791	112.961	2.20064e-26	3.43624e-24
ENSMUSG00000024186	Rgs11	1.93514	3.40832	41.5396	1.15507e-10	4.35987e-09
ENSMUSG00000049526	Tmem202	1.94359	1.24214	8.92612	0.00281121	0.0189724
ENSMUSG00000036894	Rap2b	1.94895	4.59735	44.8395	2.13863e-11	8.86159e-10
ENSMUSG00000050105	Grrp1	1.95199	1.05816	10.8072	0.00101108	0.00818241
ENSMUSG00000048279	Sacs	1.95312	2.68492	24.0839	9.22297e-07	1.7931e-05
ENSMUSG00000030431	Tmem238	1.95843	1.44141	10.8004	0.00101479	0.00820795
ENSMUSG00000027514	Zbp1	1.96132	4.21237	28.4364	9.68251e-08	2.36623e-06
ENSMUSG00000055675	Kbtbd11	1.97173	3.2307	50.4657	1.21267e-12	5.76561e-11
ENSMUSG00000005465	Il27ra	1.98152	0.63964	12.9938	0.000312522	0.00302608
ENSMUSG00000011148	Adssl1	1.99257	6.54172	106.332	6.23562e-25	9.15833e-23
ENSMUSG00000030107	Usp18	1.99311	4.31672	51.5713	6.9042e-13	3.43681e-11
ENSMUSG00000032011	Thy1	1.99433	1.56161	14.5535	0.000136239	0.00150931
ENSMUSG00000095930	Nim1k	1.99628	0.680762	11.5905	0.000662888	0.00572701
ENSMUSG00000022893	Adamts1	1.99633	4.55823	50.665	1.09557e-12	5.29372e-11
ENSMUSG00000029641	Rasl11a	2.00489	0.46705	8.20253	0.0041832	0.026183
ENSMUSG00000078921	Tgtp2	2.00578	2.54232	33.9978	5.51756e-09	1.70134e-07
ENSMUSG00000073902	Gm1966	2.00816	4.1891	17.0381	3.66374e-05	0.00048918
ENSMUSG00000036334	Igsf10	2.01324	1.46156	13.52	0.000236031	0.00238507
ENSMUSG00000049551	Fzd9	2.01773	0.993993	12.0973	0.000504951	0.00453691
ENSMUSG00000055413	H2-Q5	2.01856	3.55709	28.7705	8.14841e-08	2.01456e-06
ENSMUSG00000040616	Tmem51	2.02313	2.69783	22.9972	1.62237e-06	2.98219e-05
ENSMUSG00000020524	Gria1	2.02538	0.765805	13.5118	0.000237065	0.00239226
ENSMUSG00000026610	Esrrg	2.03041	0.263774	11.5691	0.000670579	0.00578672
ENSMUSG00000025324	Atp10a	2.03151	3.12423	20.523	5.89188e-06	9.61497e-05
ENSMUSG00000029338	Antxr2	2.03351	3.61442	76.2976	2.43983e-18	2.16721e-16
ENSMUSG00000044609	Gm9294	2.03644	0.190276	9.39075	0.00218083	0.015427
ENSMUSG00000073490	Ifi207	2.03704	4.82007	91.5676	1.07846e-21	1.24984e-19
ENSMUSG00000037242	Clic4	2.03913	5.42814	78.1622	9.49161e-19	8.85525e-17
ENSMUSG00000040883	Tmem205	2.04427	4.07285	40.9861	1.53316e-10	5.69998e-09
ENSMUSG00000015222	Map2	2.04512	1.77488	15.7783	7.12141e-05	0.000860413
ENSMUSG00000040867	Begain	2.04736	0.33666	7.12529	0.0076004	0.0422739
ENSMUSG00000034459	Ifit1	2.04838	3.17658	31.8209	1.69059e-08	4.77681e-07
ENSMUSG00000037855	Zfp365	2.05183	0.599373	6.77559	0.0092413	0.0494417
ENSMUSG00000046223	Plaur	2.05394	6.19209	74.7347	5.38403e-18	4.69804e-16
ENSMUSG00000025795	Rassf3	2.05738	6.27221	146.617	9.51642e-34	2.07598e-31
ENSMUSG00000020085	Aifm2	2.05875	1.75391	27.9046	1.27445e-07	3.02557e-06
ENSMUSG00000028716	Pdzk1ip1	2.06007	1.15604	8.47761	0.00359543	0.0230886
ENSMUSG00000073591	Pcdhb22	2.06046	3.38807	56.8965	4.59361e-14	2.62083e-12
ENSMUSG00000021822	Plau	2.06052	7.96579	158.775	2.09575e-36	5.09645e-34
ENSMUSG00000020841	Cpd	2.07245	7.36698	101.488	7.18847e-24	9.52087e-22
ENSMUSG00000026672	Optn	2.07508	3.60216	67.5057	2.10077e-16	1.52014e-14
ENSMUSG00000017146	Brca1	2.08121	0.77412	13.1967	0.000280448	0.00275616
ENSMUSG00000017412	Cacnb4	2.08915	2.41922	18.2694	1.91767e-05	0.00027379
ENSMUSG00000017724	Etv4	2.09329	2.71386	27.1986	1.83588e-07	4.18445e-06
ENSMUSG00000106951	5930430L01Rik	2.09431	1.00595	11.5342	0.000683263	0.00586886
ENSMUSG00000001313	Rnd2	2.09898	2.81942	29.8988	4.55186e-08	1.19933e-06
ENSMUSG00000057315	Arhgap24	2.09989	5.0414	137.552	9.13203e-32	1.78243e-29
ENSMUSG00000056749	Nfil3	2.10534	3.5178	53.7229	2.30856e-13	1.21008e-11
ENSMUSG00000090675	Olfr111	2.11226	5.48688	23.3136	1.37624e-06	2.58747e-05
ENSMUSG00000049265	Kcnk3	2.11424	0.861065	9.5188	0.00203377	0.0145393
ENSMUSG00000023046	Igfbp6	2.11869	0.214657	6.93309	0.00846154	0.0460012
ENSMUSG00000018927	Ccl6	2.12266	8.94232	104.792	1.3566e-24	1.93498e-22
ENSMUSG00000026072	Il1r1	2.13906	3.17261	51.4524	7.33534e-13	3.62708e-11
ENSMUSG00000036452	Arhgap26	2.14162	3.73081	59.0039	1.5736e-14	9.4124e-13
ENSMUSG00000015980	Lrrc27	2.14325	2.74884	37.9694	7.18637e-10	2.48491e-08
ENSMUSG00000039264	Gimap3	2.15643	0.935098	14.4851	0.000141276	0.00155929
ENSMUSG00000033307	Mif	2.16357	7.23584	64.0628	1.20516e-15	8.12606e-14
ENSMUSG00000017639	Rab11fip4	2.16787	3.87623	80.0739	3.60671e-19	3.45173e-17
ENSMUSG00000045934	Mtmr11	2.16855	1.4527	27.8562	1.30675e-07	3.0916e-06
ENSMUSG00000032661	Oas3	2.16983	2.51277	21.1051	4.34779e-06	7.32899e-05
ENSMUSG00000042659	Arrdc4	2.17256	5.27348	114.738	8.98149e-27	1.41736e-24
ENSMUSG00000027555	Car13	2.17278	0.460675	13.0964	0.000295859	0.00288356
ENSMUSG00000044042	Fmn1	2.17383	4.2698	60.3619	7.89253e-15	4.91923e-13
ENSMUSG00000032656	44623	2.17863	2.33329	36.0969	1.87742e-09	6.1888e-08
ENSMUSG00000033467	Crlf2	2.18323	8.39675	49.8625	1.64904e-12	7.6205e-11
ENSMUSG00000025743	Sdc3	2.18884	8.66321	124.195	7.63527e-29	1.30186e-26
ENSMUSG00000073489	Ifi204	2.19629	5.31044	90.2345	2.11538e-21	2.41381e-19
ENSMUSG00000038180	Spag4	2.1987	-0.222687	7.76498	0.00532689	0.0317857
ENSMUSG00000020641	Rsad2	2.19981	2.77666	30.8056	2.85214e-08	7.76305e-07
ENSMUSG00000039981	Zc3h12d	2.20362	1.13182	16.5801	4.66379e-05	0.000605272
ENSMUSG00000029648	Flt1	2.20896	5.9839	23.4775	1.26384e-06	2.40357e-05
ENSMUSG00000031137	Fgf13	2.21775	4.05663	69.8291	6.46726e-17	5.04923e-15
ENSMUSG00000028459	Cd72	2.22368	5.04729	92.6128	6.35947e-22	7.60777e-20
ENSMUSG00000016496	Cd274	2.22778	5.42201	165.329	7.75282e-38	2.09101e-35
ENSMUSG00000105769	Gm43351	2.22967	1.86745	22.0684	2.63111e-06	4.65195e-05
ENSMUSG00000033249	Hsf4	2.23188	1.59104	24.7849	6.40982e-07	1.29895e-05
ENSMUSG00000020027	Socs2	2.23307	1.91332	29.6893	5.07149e-08	1.31522e-06
ENSMUSG00000028626	Col9a2	2.23712	1.49695	15.8487	6.86143e-05	0.000833599
ENSMUSG00000036103	Colec12	2.24238	3.92195	72.5085	1.66318e-17	1.3783e-15
ENSMUSG00000033082	Clec1a	2.24265	3.12339	61.9988	3.43671e-15	2.19742e-13
ENSMUSG00000046093	Hpcal4	2.24374	0.776775	9.39543	0.00217527	0.015395
ENSMUSG00000031266	Gla	2.24717	4.44602	105.382	1.00739e-24	1.45084e-22
ENSMUSG00000026558	Uck2	2.24908	2.35831	50.1979	1.38996e-12	6.51604e-11
ENSMUSG00000022887	Masp1	2.25048	5.23501	145.019	2.1273e-33	4.50806e-31
ENSMUSG00000047959	Kcna3	2.25317	1.23906	7.71256	0.00548379	0.0325777
ENSMUSG00000021614	Vcan	2.25783	0.582829	9.86483	0.00168468	0.0124269
ENSMUSG00000054404	Slfn5	2.2599	5.3947	118.685	1.22734e-27	2.04566e-25
ENSMUSG00000073409	H2-Q6	2.26396	6.01599	54.9738	1.22149e-13	6.56509e-12
ENSMUSG00000049092	Gpr137c	2.26778	2.07693	36.5854	1.46126e-09	4.88249e-08
ENSMUSG00000038204	Asb10	2.26794	5.83804	126.03	3.0282e-29	5.41208e-27
ENSMUSG00000028194	Ddah1	2.27249	1.4983	16.8815	3.97882e-05	0.00052698
ENSMUSG00000023972	Ptk7	2.27307	0.501095	8.78961	0.00302951	0.0201341
ENSMUSG00000007021	Syngr3	2.27314	-0.28365	8.02408	0.00461596	0.0283768
ENSMUSG00000056737	Capg	2.27636	7.09775	104.519	1.55685e-24	2.19946e-22
ENSMUSG00000018930	Ccl4	2.29727	7.38231	88.5888	4.86033e-21	5.3406e-19
ENSMUSG00000076441	Ass1	2.29737	1.42212	16.2971	5.41456e-05	0.00068299
ENSMUSG00000087006	Gm13889	2.29753	5.16251	36.2649	1.72238e-09	5.69039e-08
ENSMUSG00000031995	St14	2.30034	7.11925	169.637	8.88187e-39	2.48592e-36
ENSMUSG00000020431	Adcy1	2.30174	0.326361	11.8828	0.00056656	0.00502052
ENSMUSG00000020598	Nrcam	2.30264	0.299127	8.47297	0.00360463	0.0231277
ENSMUSG00000074796	Slc4a11	2.30714	-0.160434	8.93875	0.00279184	0.0188589
ENSMUSG00000039007	Cpq	2.30984	5.07342	89.6555	2.83465e-21	3.18554e-19
ENSMUSG00000021109	Hif1a	2.31038	8.18714	183.744	7.38041e-42	2.32938e-39
ENSMUSG00000041695	Kcnj2	2.3191	7.5198	156.378	6.99949e-36	1.67468e-33
ENSMUSG00000037999	Arap2	2.32965	5.0027	80.5085	2.89457e-19	2.78819e-17
ENSMUSG00000028909	Ptpru	2.33465	1.3811	14.6371	0.000130322	0.00145064
ENSMUSG00000082064	Rpl5-ps2	2.34422	-0.558027	7.30096	0.00689178	0.0391246
ENSMUSG00000040852	Plekhh2	2.34571	4.73678	85.9845	1.81348e-20	1.93534e-18
ENSMUSG00000097532	Gm4349	2.34774	0.151649	11.1188	0.000854557	0.00708184
ENSMUSG00000021363	Mak	2.35027	-0.163537	10.2951	0.00133386	0.0102948
ENSMUSG00000028037	Ifi44	2.35209	1.56221	28.4218	9.75622e-08	2.37252e-06
ENSMUSG00000039316	Rftn1	2.35428	5.59236	176.877	2.32986e-40	7.0533e-38
ENSMUSG00000033880	Lgals3bp	2.35563	9.81068	125.187	4.63128e-29	8.0824e-27
ENSMUSG00000103865	Gm37416	2.35986	2.84235	31.3529	2.1514e-08	5.98759e-07
ENSMUSG00000050967	Creg2	2.36008	0.731642	19.956	7.92441e-06	0.000125054
ENSMUSG00000017390	Aldoc	2.36707	3.90071	23.1489	1.49932e-06	2.79197e-05
ENSMUSG00000097194	9330175E14Rik	2.36717	1.49872	22.1499	2.52164e-06	4.47976e-05
ENSMUSG00000026012	Cd28	2.3672	2.18149	38.1678	6.49155e-10	2.26046e-08
ENSMUSG00000026080	Chst10	2.3853	3.88984	83.173	7.51765e-20	7.79838e-18
ENSMUSG00000034993	Vat1	2.38778	6.32594	121.361	3.18613e-28	5.37081e-26
ENSMUSG00000034353	Ramp1	2.39285	6.75721	102.15	5.14816e-24	6.94252e-22
ENSMUSG00000060550	H2-Q7	2.40515	5.12661	51.1319	8.6363e-13	4.25182e-11
ENSMUSG00000011008	Mcoln2	2.40709	0.126452	9.57653	0.0019708	0.0141779
ENSMUSG00000117239	AC166110.3	2.41004	0.834794	12.9881	0.00031347	0.00302932
ENSMUSG00000068758	Il3ra	2.41034	5.49098	62.8051	2.28205e-15	1.49128e-13
ENSMUSG00000071324	Armc2	2.41145	2.00835	29.8383	4.69615e-08	1.22862e-06
ENSMUSG00000041180	Hectd2	2.41268	2.23936	17.5348	2.82091e-05	0.000387617
ENSMUSG00000037600	Kdf1	2.41788	0.441707	13.7984	0.000203508	0.00212146
ENSMUSG00000049871	Nlrc3	2.42123	2.38996	26.9291	2.11059e-07	4.75091e-06
ENSMUSG00000103088	Pcdhgb6	2.42142	0.698482	12.4984	0.000407291	0.00376903
ENSMUSG00000009670	Tex11	2.44362	0.415489	8.41346	0.00372453	0.0237899
ENSMUSG00000063297	Luzp2	2.44508	0.532295	12.4845	0.000410335	0.00379247
ENSMUSG00000020262	Adarb1	2.44968	5.3208	95.5533	1.43964e-22	1.80979e-20
ENSMUSG00000032418	Me1	2.45064	1.12218	26.6331	2.45996e-07	5.43021e-06
ENSMUSG00000024654	Asrgl1	2.45513	3.61392	70.5371	4.51702e-17	3.58318e-15
ENSMUSG00000097649	Gm10561	2.45621	0.10401	7.18237	0.00736235	0.0412016
ENSMUSG00000047797	Gjb1	2.46186	-0.17241	7.85191	0.00507671	0.030624
ENSMUSG00000032181	Scg3	2.46198	2.00539	25.2426	5.05534e-07	1.05324e-05
ENSMUSG00000031996	Aplp2	2.46428	8.41926	222.269	2.89427e-50	1.12983e-47
ENSMUSG00000015843	Rxrg	2.46951	3.1941	60.3863	7.79553e-15	4.87928e-13
ENSMUSG00000036067	Slc2a6	2.47997	4.47957	53.7091	2.32479e-13	1.21179e-11
ENSMUSG00000073405	H2-T-ps	2.48252	1.72902	28.6212	8.80152e-08	2.16207e-06
ENSMUSG00000081251	Gm12164	2.48693	0.358287	10.0877	0.0014926	0.0112621
ENSMUSG00000081343	Gm16071	2.48744	0.369839	10.9462	0.000937972	0.0076534
ENSMUSG00000041120	Nbl1	2.4947	5.37177	76.1469	2.63334e-18	2.32517e-16
ENSMUSG00000051022	Hs3st1	2.50028	2.28579	33.7801	6.17079e-09	1.88355e-07
ENSMUSG00000026764	Kif5c	2.51797	2.47758	43.6765	3.874e-11	1.57444e-09
ENSMUSG00000022636	Alcam	2.52289	3.21594	57.6521	3.12836e-14	1.80569e-12
ENSMUSG00000090894	Olfr110	2.53311	3.45703	70.6549	4.25511e-17	3.39356e-15
ENSMUSG00000024640	Psat1	2.53701	7.12137	227.754	1.84163e-51	7.80537e-49
ENSMUSG00000039616	Mocos	2.53761	2.09418	50.5576	1.15719e-12	5.51952e-11
ENSMUSG00000040276	Pacsin1	2.54821	4.89132	153.684	2.71521e-35	6.39324e-33
ENSMUSG00000055737	Ghr	2.56221	1.40158	24.5052	7.41114e-07	1.47964e-05
ENSMUSG00000029561	Oasl2	2.56446	5.71698	148.871	3.06013e-34	6.98368e-32
ENSMUSG00000111118	Gm6545	2.58179	0.215377	10.9441	0.000939044	0.00765793
ENSMUSG00000000982	Ccl3	2.58595	8.25782	102.822	3.66707e-24	4.99058e-22
ENSMUSG00000002228	Ppm1j	2.60304	1.96251	33.0143	9.14816e-09	2.71408e-07
ENSMUSG00000030772	Dkk3	2.60877	0.217424	13.6267	0.000222992	0.00228286
ENSMUSG00000034593	Myo5a	2.60898	6.6422	90.1116	2.25099e-21	2.54894e-19
ENSMUSG00000032193	Ldlr	2.61019	5.15407	104.004	2.01924e-24	2.8258e-22
ENSMUSG00000039103	Nexn	2.61375	3.27864	85.8732	1.91856e-20	2.03285e-18
ENSMUSG00000029778	Adcyap1r1	2.63121	1.13193	20.0433	7.57079e-06	0.000119856
ENSMUSG00000040711	Sh3pxd2b	2.63243	4.63911	144.021	3.51564e-33	7.2432e-31
ENSMUSG00000020684	Rasl10b	2.63254	1.66901	17.7738	2.48786e-05	0.00034685
ENSMUSG00000045502	Hcar2	2.63395	5.78273	191.695	1.35662e-43	4.57367e-41
ENSMUSG00000047798	Cd300lf	2.63648	4.30686	107.21	4.00338e-25	5.99859e-23
ENSMUSG00000066861	Oas1g	2.63815	2.80354	41.4296	1.22194e-10	4.58892e-09
ENSMUSG00000097365	C030034L19Rik	2.64002	1.9748	33.994	5.52815e-09	1.70134e-07
ENSMUSG00000025931	Paqr8	2.64293	2.79911	48.3358	3.59142e-12	1.59986e-10
ENSMUSG00000032715	Trib3	2.65404	1.36246	21.5114	3.51723e-06	6.04572e-05
ENSMUSG00000111942	Gm5182	2.65781	2.89623	24.4637	7.57227e-07	1.50371e-05
ENSMUSG00000032517	Mobp	2.66233	4.28533	42.1598	8.41121e-11	3.23243e-09
ENSMUSG00000052776	Oas1a	2.66689	4.74757	131.745	1.70085e-30	3.19371e-28
ENSMUSG00000006800	Sulf2	2.67249	6.24052	204.691	1.97768e-46	7.33422e-44
ENSMUSG00000041556	Fbxo2	2.67825	0.789878	9.44341	0.00211909	0.0150621
ENSMUSG00000017400	Stac2	2.68402	0.450646	12.3716	0.000435911	0.00400143
ENSMUSG00000066607	Insyn1	2.69649	-0.000756639	7.45855	0.00631359	0.0363591
ENSMUSG00000042349	Ikbke	2.70988	1.65525	30.5744	3.21298e-08	8.66569e-07
ENSMUSG00000019874	Fabp7	2.71129	-0.116433	12.7932	0.000347888	0.0032996
ENSMUSG00000059213	Ddn	2.738	2.10691	30.6619	3.07138e-08	8.31402e-07
ENSMUSG00000074607	Tox2	2.74882	1.93408	33.0274	9.08689e-09	2.7013e-07
ENSMUSG00000060568	Fam78b	2.75148	0.606175	15.4548	8.4501e-05	0.000998795
ENSMUSG00000030361	Klrb1a	2.75679	-0.0185094	7.00854	0.00811217	0.0444865
ENSMUSG00000086108	Gm5602	2.76227	-0.198946	9.85429	0.00169437	0.0124797
ENSMUSG00000049044	Rapgef4	2.77165	2.78666	22.9349	1.67584e-06	3.06907e-05
ENSMUSG00000071604	Fam189a2	2.77459	2.76439	65.8157	4.95113e-16	3.43285e-14
ENSMUSG00000029602	Rasal1	2.77771	0.210517	13.9031	0.000192476	0.00203216
ENSMUSG00000026640	Plxna2	2.78465	2.91001	29.5379	5.48339e-08	1.40485e-06
ENSMUSG00000046687	Gm5424	2.79211	1.20782	31.9919	1.5482e-08	4.42505e-07
ENSMUSG00000086040	Wipf3	2.79732	2.63261	38.6478	5.07594e-10	1.78852e-08
ENSMUSG00000029636	Wasf3	2.80427	2.08403	34.1128	5.20078e-09	1.61353e-07
ENSMUSG00000038319	Kcnh2	2.808	3.22916	47.9383	4.39846e-12	1.9361e-10
ENSMUSG00000052565	Hist1h1d	2.81272	1.58942	27.0809	1.95113e-07	4.41878e-06
ENSMUSG00000037679	Inf2	2.81906	4.72397	146.199	1.17428e-33	2.52453e-31
ENSMUSG00000039942	Ptger4	2.82504	4.01576	111.894	3.7701e-26	5.8256e-24
ENSMUSG00000074802	Gas2l3	2.82823	4.45092	132.191	1.35902e-30	2.58457e-28
ENSMUSG00000102882	Gm2065	2.83819	0.518572	11.9147	0.000556917	0.00494986
ENSMUSG00000028121	Bcar3	2.84584	3.14853	89.5325	3.01649e-21	3.36441e-19
ENSMUSG00000068606	Gm4841	2.8459	0.666851	17.6739	2.62205e-05	0.000364532
ENSMUSG00000045045	Lrfn4	2.85826	2.11177	31.3878	2.11302e-08	5.89184e-07
ENSMUSG00000026866	Kynu	2.86711	2.65256	72.9789	1.31041e-17	1.11716e-15
ENSMUSG00000028519	Dab1	2.86988	0.884244	15.778	7.12274e-05	0.000860413
ENSMUSG00000115138	Gm36899	2.88799	0.121285	11.8312	0.000582473	0.00513393
ENSMUSG00000021750	Fam107a	2.91543	4.00746	52.084	5.31753e-13	2.6739e-11
ENSMUSG00000042388	Dlgap3	2.92094	1.69175	22.7313	1.86312e-06	3.37867e-05
ENSMUSG00000004558	Ndrg2	2.9247	5.85842	61.8358	3.73324e-15	2.37678e-13
ENSMUSG00000112148	Lilrb4a	2.93273	6.07429	55.2539	1.05927e-13	5.77689e-12
ENSMUSG00000106755	Tpi-rs11	2.94106	0.678892	18.2507	1.93656e-05	0.000275956
ENSMUSG00000029189	Sel1l3	2.94136	1.4772	21.4772	3.58069e-06	6.14768e-05
ENSMUSG00000031342	Gpm6b	2.94575	4.5478	45.7798	1.32322e-11	5.62424e-10
ENSMUSG00000104654	Gm43814	2.9491	0.42594	16.4051	5.11466e-05	0.000655189
ENSMUSG00000089651	Gm16353	2.96346	0.464309	17.8591	2.37882e-05	0.0003329
ENSMUSG00000014602	Kif1a	2.9783	4.48995	149.76	1.95585e-34	4.53329e-32
ENSMUSG00000024598	Fbn2	2.97908	0.540828	13.9728	0.000185479	0.00196809
ENSMUSG00000005089	Slc1a2	2.99023	5.23547	42.4838	7.12712e-11	2.75322e-09
ENSMUSG00000044548	Dact1	2.99074	2.60079	72.8438	1.4033e-17	1.17846e-15
ENSMUSG00000024232	Bambi	3.00623	3.10182	92.6311	6.3008e-22	7.59887e-20
ENSMUSG00000079017	Ifi27l2a	3.02885	6.09456	74.3712	6.47274e-18	5.61501e-16
ENSMUSG00000079298	Klrb1b	3.03771	2.50296	80.8774	2.4017e-19	2.32855e-17
ENSMUSG00000097654	Gm26714	3.03783	2.79922	54.2536	1.76216e-13	9.30246e-12
ENSMUSG00000033763	Mtss1l	3.0395	3.75819	55.2116	1.08229e-13	5.88085e-12
ENSMUSG00000025978	Rftn2	3.04208	1.97096	45.4319	1.58038e-11	6.6224e-10
ENSMUSG00000086109	Gm13391	3.06463	3.38083	91.6205	1.05e-21	1.22643e-19
ENSMUSG00000037071	Scd1	3.06841	3.88171	91.9194	9.02803e-22	1.06287e-19
ENSMUSG00000027698	Nceh1	3.07165	6.50259	310.563	1.64685e-69	1.22147e-66
ENSMUSG00000036585	Fgf1	3.08603	4.36034	163.315	2.13464e-37	5.55531e-35
ENSMUSG00000033066	Gas7	3.08646	5.36297	274.613	1.12095e-61	5.54272e-59
ENSMUSG00000035805	Mlc1	3.09035	1.65885	20.4425	6.14513e-06	9.98432e-05
ENSMUSG00000061451	Tmem151a	3.10655	2.32087	62.5645	2.57855e-15	1.67764e-13
ENSMUSG00000028362	Tnfsf8	3.11411	4.67081	118.336	1.46357e-27	2.41229e-25
ENSMUSG00000102599	Gm38386	3.11818	1.34581	40.7143	1.76192e-10	6.50158e-09
ENSMUSG00000055865	Fam19a3	3.1387	0.9824	20.7683	5.18341e-06	8.56243e-05
ENSMUSG00000104000	Gm38335	3.14942	-0.0850597	11.5967	0.000660689	0.00571646
ENSMUSG00000041801	Phlda3	3.15589	2.2054	25.8447	3.70023e-07	7.90911e-06
ENSMUSG00000063060	Sox7	3.16689	1.96745	30.2135	3.87003e-08	1.02332e-06
ENSMUSG00000084932	Gm15156	3.17802	2.2794	59.0753	1.51755e-14	9.15098e-13
ENSMUSG00000031302	Nlgn3	3.1811	-0.371498	8.31156	0.00393936	0.0249409
ENSMUSG00000032220	Myo1e	3.21047	7.45575	351.279	2.23158e-78	2.06895e-75
ENSMUSG00000096971	4930556M19Rik	3.2251	2.01722	74.9348	4.8652e-18	4.27044e-16
ENSMUSG00000034656	Cacna1a	3.23445	6.13531	118.136	1.61868e-27	2.63863e-25
ENSMUSG00000042842	Serpinb6b	3.23707	1.49397	43.0742	5.2704e-11	2.08483e-09
ENSMUSG00000032186	Tmod2	3.27937	2.31484	24.8202	6.2936e-07	1.28065e-05
ENSMUSG00000002985	Apoe	3.28092	13.5808	115.525	6.04006e-27	9.63422e-25
ENSMUSG00000115855	Gm34643	3.28227	0.0279484	11.5961	0.000660896	0.00571646
ENSMUSG00000066687	Zbtb16	3.29625	1.50445	48.47	3.35373e-12	1.49847e-10
ENSMUSG00000021508	Cxcl14	3.3031	3.46611	65.8153	4.95234e-16	3.43285e-14
ENSMUSG00000100157	2310034O05Rik	3.31837	0.438351	14.7311	0.000123982	0.00139329
ENSMUSG00000041552	Ptchd1	3.32155	4.23042	87.0147	1.07716e-20	1.16633e-18
ENSMUSG00000027748	Trpc4	3.33446	1.27725	36.508	1.52044e-09	5.05701e-08
ENSMUSG00000003418	St8sia6	3.35117	6.15009	167.526	2.56749e-38	7.05299e-36
ENSMUSG00000042429	Adora1	3.36708	3.23918	87.1162	1.02328e-20	1.11613e-18
ENSMUSG00000026285	Pdcd1	3.37391	5.60659	200.602	1.54343e-45	5.58419e-43
ENSMUSG00000024727	Trpm6	3.43431	1.13044	21.6114	3.33869e-06	5.76556e-05
ENSMUSG00000022296	Baalc	3.44264	0.944571	32.0199	1.52603e-08	4.3701e-07
ENSMUSG00000041670	Rims1	3.44604	1.2206	27.1666	1.8666e-07	4.2468e-06
ENSMUSG00000060843	Ctnna3	3.49952	1.7045	44.5748	2.44819e-11	1.00879e-09
ENSMUSG00000048376	F2r	3.52828	0.959282	16.819	4.11194e-05	0.000541229
ENSMUSG00000026437	Cdk18	3.53293	4.46572	184.778	4.38875e-42	1.44673e-39
ENSMUSG00000048058	Ldlrad3	3.53325	3.71863	158.812	2.05687e-36	5.08526e-34
ENSMUSG00000022246	Rai14	3.54116	4.15648	146.688	9.18285e-34	2.03311e-31
ENSMUSG00000051611	Olfr112	3.55049	0.477578	15.4098	8.65405e-05	0.00101884
ENSMUSG00000114961	A930002C04Rik	3.56159	0.205869	17.0393	3.66139e-05	0.00048918
ENSMUSG00000104621	Gm43185	3.57252	0.108918	15.1594	9.88035e-05	0.00114147
ENSMUSG00000030701	Plekhb1	3.58914	3.9709	65.9551	4.61313e-16	3.22788e-14
ENSMUSG00000050390	C77080	3.59735	2.44558	49.4502	2.03475e-12	9.34475e-11
ENSMUSG00000074280	Gm6166	3.59793	-0.487981	13.866	0.000196317	0.0020639
ENSMUSG00000019232	Etnppl	3.62288	0.125631	10.0681	0.00150856	0.0113594
ENSMUSG00000026185	Igfbp5	3.63046	3.52661	43.3521	4.57249e-11	1.8332e-09
ENSMUSG00000024670	Cd6	3.65287	-0.530037	9.27112	0.00232795	0.016295
ENSMUSG00000042622	Maff	3.6579	3.8504	140.495	2.07496e-32	4.15946e-30
ENSMUSG00000035258	Abi3bp	3.68387	1.28921	25.4022	4.6539e-07	9.79234e-06
ENSMUSG00000103755	Gm37805	3.68449	-0.252608	15.9132	6.63159e-05	0.000811659
ENSMUSG00000105514	Gm42913	3.72603	-0.359548	8.15564	0.00429276	0.0267558
ENSMUSG00000068099	1500009C09Rik	3.7336	2.18245	42.7053	6.36398e-11	2.4843e-09
ENSMUSG00000040907	Atp1a3	3.74654	7.48844	299.811	3.62179e-67	2.14903e-64
ENSMUSG00000058934	Igf1os	3.74873	1.10848	27.923	1.26243e-07	3.00719e-06
ENSMUSG00000044303	Cdkn2a	3.76011	1.27113	26.8707	2.17532e-07	4.85975e-06
ENSMUSG00000028278	Rragd	3.76903	3.97822	163.953	1.54923e-37	4.10381e-35
ENSMUSG00000030657	Xylt1	3.82037	5.37462	252.262	8.34443e-57	3.75095e-54
ENSMUSG00000032537	Ephb1	3.83173	-0.389752	9.69509	0.00184761	0.0134946
ENSMUSG00000020532	Acaca	3.84814	6.00836	240.202	3.55371e-54	1.55046e-51
ENSMUSG00000032911	Cspg4	3.86462	4.85421	34.8619	3.53944e-09	1.12188e-07
ENSMUSG00000025854	Fam20c	3.86584	6.62584	439.762	1.2199e-97	1.508e-94
ENSMUSG00000108820	Gm44620	3.86827	0.937716	25.9475	3.50823e-07	7.54219e-06
ENSMUSG00000049556	Lingo1	3.89102	1.06098	40.3807	2.08993e-10	7.65482e-09
ENSMUSG00000027296	Itpka	3.90535	-0.140094	18.5431	1.66101e-05	0.00024062
ENSMUSG00000015709	Arnt2	3.92288	4.61888	225.153	6.79949e-51	2.72604e-48
ENSMUSG00000002602	Axl	3.93976	8.72911	360.518	2.17219e-80	2.14815e-77
ENSMUSG00000044258	Ctla2a	3.95265	1.88054	64.6521	8.93593e-16	6.05277e-14
ENSMUSG00000028527	Ak4	3.98073	1.68294	30.4661	3.39759e-08	9.09745e-07
ENSMUSG00000040649	Rimklb	4.02801	0.215306	21.0704	4.42704e-06	7.44566e-05
ENSMUSG00000031340	Gabre	4.05817	0.472221	27.8313	1.32364e-07	3.11665e-06
ENSMUSG00000022265	Ank	4.06172	8.99743	439.026	1.76356e-97	2.01235e-94
ENSMUSG00000067279	Ppp1r3c	4.06386	2.5059	29.8949	4.561e-08	1.19961e-06
ENSMUSG00000067577	A430093F15Rik	4.09061	2.24015	50.1859	1.39847e-12	6.51604e-11
ENSMUSG00000030785	Cox6a2	4.15665	5.51247	196.222	1.39438e-44	4.92482e-42
ENSMUSG00000079293	Clec7a	4.15826	8.54449	473.014	7.07762e-105	1.04989e-101
ENSMUSG00000007682	Dio2	4.20176	1.92839	39.3566	3.53066e-10	1.26813e-08
ENSMUSG00000062082	Cd200r4	4.22429	4.24438	174.895	6.31014e-40	1.87209e-37
ENSMUSG00000025586	Cpeb1	4.24019	3.73751	174.231	8.81143e-40	2.56292e-37
ENSMUSG00000014599	Csf1	4.24333	8.2021	611.472	5.35342e-135	1.98532e-131
ENSMUSG00000028327	Stra6l	4.24606	0.883376	31.8305	1.68227e-08	4.77146e-07
ENSMUSG00000020658	Efr3b	4.29003	5.1796	125.313	4.34775e-29	7.67791e-27
ENSMUSG00000072812	Ahnak2	4.35028	2.07709	59.3133	1.34461e-14	8.20823e-13
ENSMUSG00000033350	Chst2	4.36509	6.37908	487.788	4.31686e-108	7.11514e-105
ENSMUSG00000039313	AF529169	4.3822	4.89776	252.648	6.8737e-57	3.18639e-54
ENSMUSG00000045903	Npas4	4.3914	0.821233	26.8556	2.19233e-07	4.89038e-06
ENSMUSG00000007877	Tcap	4.46554	2.38711	101.796	6.15443e-24	8.22476e-22
ENSMUSG00000066705	Fxyd6	4.49755	2.22143	50.182	1.40125e-12	6.51604e-11
ENSMUSG00000030103	Bhlhe40	4.51035	5.51413	308.384	4.91099e-69	3.31135e-66
ENSMUSG00000037852	Cpe	4.51826	5.97508	107.304	3.81875e-25	5.78033e-23
ENSMUSG00000053279	Aldh1a1	4.53463	3.30024	72.2447	1.90101e-17	1.56664e-15
ENSMUSG00000013523	Bcas1	4.56565	2.63749	68.6418	1.18073e-16	8.89085e-15
ENSMUSG00000059974	Ntm	4.60196	1.48024	43.1475	5.07651e-11	2.02388e-09
ENSMUSG00000025089	Gfra1	4.67792	-0.381366	20.5636	5.76826e-06	9.4653e-05
ENSMUSG00000033208	S100b	4.70304	3.25945	105.759	8.32668e-25	1.21096e-22
ENSMUSG00000032532	Cck	4.75765	2.9691	76.7996	1.89213e-18	1.71145e-16
ENSMUSG00000030789	Itgax	4.76398	8.89789	614.836	9.9303e-136	4.9102e-132
ENSMUSG00000053957	Gm12474	4.77611	-0.0763845	27.246	1.79148e-07	4.09473e-06
ENSMUSG00000004552	Ctse	4.81498	4.36819	297.203	1.33982e-66	7.64421e-64
ENSMUSG00000020053	Igf1	4.85918	7.30534	596.071	1.19788e-131	3.55388e-128
ENSMUSG00000036617	Etl4	4.89802	5.37255	183.781	7.24344e-42	2.32938e-39
ENSMUSG00000074657	Kif5a	4.97463	6.04728	279.653	8.93671e-63	4.57128e-60
ENSMUSG00000057337	Chst3	4.98161	2.51754	82.0641	1.31743e-19	1.33855e-17
ENSMUSG00000052688	Rab7b	4.99868	5.43028	345.181	4.74904e-77	4.14396e-74
ENSMUSG00000021091	Serpina3n	5.12373	0.75469	35.3154	2.804e-09	9.0423e-08
ENSMUSG00000041957	Pkp2	5.12545	0.276559	38.9443	4.36062e-10	1.5475e-08
ENSMUSG00000024669	Cd5	5.217	3.35183	99.7928	1.69201e-23	2.20169e-21
ENSMUSG00000036853	Mcoln3	5.21982	0.960524	50.8326	1.00588e-12	4.8922e-11
ENSMUSG00000026435	Slc45a3	5.29348	1.3547	56.1348	6.76702e-14	3.80235e-12
ENSMUSG00000053141	Ptprt	5.29361	0.981702	63.4314	1.66054e-15	1.09477e-13
ENSMUSG00000035273	Hpse	5.32322	5.70857	688.6	9.00989e-152	6.68264e-148
ENSMUSG00000028773	Fabp3	5.34522	4.59908	173.495	1.27597e-39	3.63994e-37
ENSMUSG00000026475	Rgs16	5.3507	2.87367	98.4607	3.3154e-23	4.20347e-21
ENSMUSG00000106743	Gm42847	5.41832	-0.00369026	32.7314	1.05814e-08	3.09594e-07
ENSMUSG00000015568	Lpl	5.46625	8.87576	707.263	7.87793e-156	1.16861e-151
ENSMUSG00000050370	Ch25h	5.57501	5.82991	210.944	8.54732e-48	3.25105e-45
ENSMUSG00000037386	Rims2	5.60717	0.0698072	33.8586	5.92654e-09	1.81641e-07
ENSMUSG00000035105	Egln3	5.68789	5.16429	283.033	1.6391e-63	8.68371e-61
ENSMUSG00000070803	Cited4	5.78643	3.23158	80.8877	2.38915e-19	2.32855e-17
ENSMUSG00000070858	Gm1673	5.81209	4.86721	91.2265	1.28131e-21	1.4734e-19
ENSMUSG00000024529	Lox	5.81637	4.84214	191.991	1.1686e-43	4.03141e-41
ENSMUSG00000056367	Actr3b	5.88234	4.98588	304.915	2.79953e-68	1.80557e-65
ENSMUSG00000030329	Pianp	6.24592	5.76149	135.791	2.21638e-31	4.26984e-29
ENSMUSG00000097558	Gm26902	6.45966	2.39852	117.405	2.3406e-27	3.77397e-25
ENSMUSG00000024245	Tmem178	6.49935	2.72201	177.927	1.37436e-40	4.24733e-38
ENSMUSG00000027533	Fabp5	6.51986	6.44873	285.026	6.03125e-64	3.31362e-61
ENSMUSG00000022303	Dcstamp	6.52272	3.25003	271.505	5.33165e-61	2.55128e-58
ENSMUSG00000074336	Apoc4	6.5315	0.954609	64.0352	1.22217e-15	8.20347e-14
ENSMUSG00000036760	Kcnk9	6.55111	4.41207	124.872	5.42967e-29	9.36554e-27
ENSMUSG00000011154	Cfap161	6.66416	0.0159868	49.31	2.18549e-12	9.97524e-11
ENSMUSG00000029304	Spp1	6.69496	8.59967	495.982	7.11444e-110	1.31919e-106
ENSMUSG00000068129	Cst7	7.0007	10.4256	576.419	2.25424e-127	5.57323e-124
ENSMUSG00000028238	Atp6v0d2	7.14719	3.72127	308.828	3.93088e-69	2.7767e-66
ENSMUSG00000030523	Trpm1	7.15145	4.38179	449.666	8.52774e-100	1.15e-96
ENSMUSG00000099696	2900052N01Rik	7.4483	2.88765	147.614	5.76112e-34	1.29486e-31
ENSMUSG00000018126	Baiap2l2	7.46265	7.0914	302.127	1.1334e-67	7.00539e-65
ENSMUSG00000026347	Tmem163	7.47185	4.10043	226.344	3.73908e-51	1.54071e-48
ENSMUSG00000031382	Asb11	7.72217	1.00825	86.2286	1.60293e-20	1.72303e-18
ENSMUSG00000116121	Gm49486	7.86635	-0.0515524	43.6413	3.94423e-11	1.5986e-09
ENSMUSG00000079049	Serpinb1c	7.92471	0.000688039	48.0614	4.13078e-12	1.82369e-10
ENSMUSG00000028031	Dkk2	7.94418	4.29269	344.05	8.37103e-77	6.89866e-74
ENSMUSG00000033207	Mamdc2	7.98065	6.43397	137.798	8.06672e-32	1.59549e-29
ENSMUSG00000020218	Wif1	8.1143	0.15982	55.0606	1.16873e-13	6.32736e-12
ENSMUSG00000039252	Lgi2	8.33197	5.18348	373.005	4.14862e-83	4.39576e-80
ENSMUSG00000029816	Gpnmb	8.50594	8.03049	499.24	1.39073e-110	2.94715e-107
ENSMUSG00000029158	Yipf7	9.15022	1.14669	110.214	8.79785e-26	1.34544e-23
ENSMUSG00000020932	Gfap	9.99585	7.59141	324.602	1.44082e-72	1.1249e-69

## Sheet: M WT NX vs WT CIH
	Gene name	logFC	logCPM	LR	PValue	FDR
ENSMUSG00000109432	Gm44785	-4.5036	-0.658747	9.44172	0.00212104	0.0107038
ENSMUSG00000016458	Wt1	-3.20102	0.136762	7.57912	0.00590484	0.0240348
ENSMUSG00000107091	Gm43343	-2.43479	0.242503	14.2675	0.000158579	0.0013012
ENSMUSG00000114401	Gm38604	-2.19208	0.932361	17.7456	2.52502e-05	0.000282965
ENSMUSG00000052435	Cebpe	-2.11518	0.474317	11.5431	0.000680023	0.00424887
ENSMUSG00000030877	Mfsd13b	-2.11204	-0.279839	6.81586	0.00903519	0.0338013
ENSMUSG00000009633	G0s2	-2.07052	1.7071	27.7214	1.40108e-07	4.01383e-06
ENSMUSG00000087632	Gm6058	-1.99699	-0.0376515	9.81486	0.00173107	0.0090561
ENSMUSG00000017002	Slpi	-1.97758	1.67336	23.5151	1.2394e-06	2.3656e-05
ENSMUSG00000022322	Shcbp1	-1.93625	0.389582	10.5706	0.001149	0.00653092
ENSMUSG00000094530	Gm21399	-1.90998	0.236543	12.4785	0.000411657	0.00282929
ENSMUSG00000104145	D130019J16Rik	-1.90927	2.08134	22.3445	2.2786e-06	3.96979e-05
ENSMUSG00000096563	Gm24095	-1.90702	-0.0635132	9.9902	0.00157375	0.00836746
ENSMUSG00000026822	Lcn2	-1.86693	5.04285	19.4961	1.00805e-05	0.000133897
ENSMUSG00000041754	Trem3	-1.85404	0.671727	14.1136	0.000172097	0.00138407
ENSMUSG00000102649	Gm38021	-1.85332	1.35883	17.7481	2.5217e-05	0.000282804
ENSMUSG00000097047	1110020A21Rik	-1.8507	0.402403	6.53148	0.0105982	0.0383094
ENSMUSG00000113198	Gm6988	-1.83661	0.20235	10.7718	0.00103057	0.00597102
ENSMUSG00000116004	AC162302.1	-1.81315	2.29037	32.67	1.09212e-08	5.18172e-07
ENSMUSG00000056071	S100a9	-1.81271	7.09336	25.3408	4.80438e-07	1.08247e-05
ENSMUSG00000112824	Gm47917	-1.81254	3.10615	45.6989	1.37897e-11	2.43072e-09
ENSMUSG00000097410	Gm26668	-1.80582	0.629914	15.7664	7.16644e-05	0.000670255
ENSMUSG00000097566	A930024N18Rik	-1.76821	-0.298482	6.07196	0.0137344	0.0469717
ENSMUSG00000038357	Camp	-1.75991	4.56507	20.1695	7.08743e-06	0.000100846
ENSMUSG00000032484	Ngp	-1.75986	6.5369	14.6888	0.000126801	0.00107818
ENSMUSG00000059213	Ddn	-1.73988	-0.127192	6.56275	0.0104135	0.0378061
ENSMUSG00000030413	Pglyrp1	-1.72215	3.2587	23.9621	9.82517e-07	1.94981e-05
ENSMUSG00000113159	Gm48771	-1.7206	0.157581	7.73975	0.00540184	0.0224137
ENSMUSG00000116733	Gm49623	-1.71127	0.284745	8.69729	0.00318683	0.0147782
ENSMUSG00000109764	Klkb1	-1.69358	0.875161	9.22975	0.00238114	0.011759
ENSMUSG00000056054	S100a8	-1.69147	6.66915	17.7193	2.5601e-05	0.00028604
ENSMUSG00000024352	Spata24	-1.68911	1.87728	28.4921	9.40792e-08	2.8885e-06
ENSMUSG00000051748	Wfdc21	-1.67583	1.8747	12.943	0.00032112	0.00230429
ENSMUSG00000103364	Gm38157	-1.62512	4.05667	35.6923	2.31076e-09	1.46704e-07
ENSMUSG00000102051	I830127L07Rik	-1.61908	1.99534	14.1881	0.000165412	0.00134183
ENSMUSG00000105870	7330423F06Rik	-1.60551	1.39544	15.6306	7.69999e-05	0.000710838
ENSMUSG00000059108	Ifitm6	-1.60303	2.86811	16.2767	5.47319e-05	0.000537384
ENSMUSG00000024501	Dpysl3	-1.60057	0.454757	11.0581	0.000882984	0.00523743
ENSMUSG00000078780	Gm5150	-1.58677	0.187076	7.76446	0.00532843	0.0221643
ENSMUSG00000103932	Gm36963	-1.57636	1.66436	19.7595	8.78231e-06	0.000119514
ENSMUSG00000097318	1700007L15Rik	-1.57111	1.23398	14.2517	0.000159915	0.00130644
ENSMUSG00000087452	Gm11998	-1.56383	1.13135	14.1597	0.000167932	0.00135933
ENSMUSG00000094258	Gm8159	-1.55232	1.14109	9.38603	0.00218645	0.0109601
ENSMUSG00000022584	Ly6c2	-1.54717	2.85672	15.6364	7.67607e-05	0.000709066
ENSMUSG00000092540	Gm8738	-1.52979	0.840709	8.6824	0.00321297	0.0148626
ENSMUSG00000096974	Gm26881	-1.52177	0.556906	8.43374	0.00368323	0.0164832
ENSMUSG00000031503	Col4a2	-1.51444	2.35679	8.50124	0.00354904	0.0160747
ENSMUSG00000090329	Gm17160	-1.48324	0.0946422	6.28366	0.0121856	0.0426681
ENSMUSG00000106706	C530043K16Rik	-1.47752	0.830329	9.62506	0.0019194	0.00985553
ENSMUSG00000111324	Gm31410	-1.47615	1.22732	13.2221	0.000276664	0.00204906
ENSMUSG00000097464	Gm26736	-1.46978	2.87272	27.498	1.57254e-07	4.35516e-06
ENSMUSG00000116021	AC133868.1	-1.44948	3.22349	36.0647	1.90875e-09	1.28246e-07
ENSMUSG00000033389	Arhgap44	-1.42735	0.182526	6.52269	0.0106507	0.0384303
ENSMUSG00000046709	Mapk10	-1.42673	0.193198	7.74626	0.00538239	0.0223521
ENSMUSG00000032496	Ltf	-1.42475	5.52052	11.9554	0.000544891	0.00355734
ENSMUSG00000031146	Plp2	-1.41992	2.02657	12.6063	0.000384441	0.00267289
ENSMUSG00000031722	Hp	-1.41369	3.32714	27.5072	1.56515e-07	4.34271e-06
ENSMUSG00000040809	Chil3	-1.40693	4.29236	11.1664	0.000832933	0.00499753
ENSMUSG00000050844	1700020N01Rik	-1.39005	1.18296	11.9899	0.000534889	0.00350579
ENSMUSG00000022651	Retnlg	-1.37742	4.46966	14.8256	0.000117924	0.00101836
ENSMUSG00000072596	Ear2	-1.37262	2.71423	12.8909	0.000330185	0.00235579
ENSMUSG00000109593	Gm45431	-1.35418	1.3794	12.2798	0.000457888	0.00309591
ENSMUSG00000017723	Wfdc2	-1.34927	0.814193	6.83386	0.00894456	0.0335544
ENSMUSG00000052270	Fpr2	-1.32919	1.41801	7.61419	0.00579109	0.0236489
ENSMUSG00000029322	Plac8	-1.32163	2.7964	13.4424	0.000246001	0.00186436
ENSMUSG00000066270	Gm10157	-1.31879	0.477518	7.76966	0.00531311	0.0221067
ENSMUSG00000036587	Fut7	-1.31867	0.998548	10.0105	0.0015565	0.00830294
ENSMUSG00000080824	Gm9001	-1.30763	0.847532	7.64251	0.00570087	0.023376
ENSMUSG00000047905	Gm8566	-1.30457	0.742471	6.27884	0.0122188	0.0427722
ENSMUSG00000046908	Ltb4r1	-1.29276	1.85085	11.9859	0.000536056	0.00351191
ENSMUSG00000027907	S100a11	-1.28836	3.59362	17.0965	3.55287e-05	0.000374614
ENSMUSG00000050640	Tmem150c	-1.28691	1.02721	6.74902	0.00937993	0.034856
ENSMUSG00000024659	Anxa1	-1.27995	3.71205	13.7092	0.000213407	0.00165415
ENSMUSG00000030785	Cox6a2	-1.27976	1.96202	14.1392	0.000169765	0.00137121
ENSMUSG00000069379	Gm4950	-1.27368	2.28335	17.6574	2.64479e-05	0.000293237
ENSMUSG00000090248	Gm14027	-1.25263	0.771904	7.61317	0.00579435	0.0236558
ENSMUSG00000025492	Ifitm3	-1.25142	5.18023	27.8393	1.31819e-07	3.82021e-06
ENSMUSG00000034765	Dusp5	-1.25118	1.68915	14.4567	0.000143417	0.00119711
ENSMUSG00000031375	Bgn	-1.24723	1.46263	6.43637	0.0111807	0.0398669
ENSMUSG00000084383	Gm13370	-1.2407	2.05516	15.6897	7.46289e-05	0.000692362
ENSMUSG00000026736	4930426L09Rik	-1.23969	1.26831	10.8347	0.000996142	0.00579771
ENSMUSG00000058443	Rpl10-ps3	-1.23378	0.758926	7.29195	0.00692642	0.0274401
ENSMUSG00000104682	Gm42636	-1.2289	0.840167	8.93402	0.00279908	0.0133562
ENSMUSG00000036185	Sapcd1	-1.22432	1.35387	8.18838	0.00421595	0.0183307
ENSMUSG00000104291	A130071D04Rik	-1.22307	3.20192	22.2679	2.37138e-06	4.11231e-05
ENSMUSG00000100691	2010320M18Rik	-1.21276	3.23022	33.5349	6.99967e-09	3.65422e-07
ENSMUSG00000097660	Gm26762	-1.21206	1.2327	7.57266	0.00592603	0.0241014
ENSMUSG00000087406	E130215H24Rik	-1.21088	1.46748	8.88299	0.0028784	0.0136694
ENSMUSG00000000157	Itgb2l	-1.20804	1.48699	6.97748	0.00825419	0.0314369
ENSMUSG00000047150	1700001C19Rik	-1.20601	1.80293	12.297	0.000453695	0.00306927
ENSMUSG00000034855	Cxcl10	-1.20381	2.82484	12.0046	0.000530683	0.00348432
ENSMUSG00000079017	Ifi27l2a	-1.20269	3.57542	17.9268	2.29571e-05	0.000261174
ENSMUSG00000047139	Cd24a	-1.20154	2.35708	11.0535	0.000885201	0.0052485
ENSMUSG00000028443	Nudt2	-1.19899	2.70171	22.1876	2.47263e-06	4.25832e-05
ENSMUSG00000081895	Rpl17-ps10	-1.19482	7.30242	47.9563	4.35832e-12	1.0705e-09
ENSMUSG00000050335	Lgals3	-1.19443	4.04645	24.6595	6.84065e-07	1.44582e-05
ENSMUSG00000106662	Gm43034	-1.19027	1.2601	8.58076	0.00339733	0.0155142
ENSMUSG00000001025	S100a6	-1.18788	2.94319	10.5131	0.0011853	0.00669908
ENSMUSG00000090200	1700025N21Rik	-1.18098	0.950755	7.74622	0.00538252	0.0223521
ENSMUSG00000035042	Ccl5	-1.18068	2.72073	7.79894	0.00522769	0.021824
ENSMUSG00000027358	Bmp2	-1.17617	1.31279	5.95237	0.0146975	0.0495862
ENSMUSG00000052212	Cd177	-1.16922	3.32962	9.98361	0.0015794	0.00839155
ENSMUSG00000060591	Ifitm2	-1.16877	3.07894	10.7436	0.00104641	0.00604407
ENSMUSG00000027368	Dusp2	-1.16039	1.96485	10.9373	0.000942484	0.00553557
ENSMUSG00000023031	Cela1	-1.15785	1.03086	7.35487	0.00668815	0.026758
ENSMUSG00000108461	AV356131	-1.1576	1.39043	7.16878	0.00741831	0.0289525
ENSMUSG00000111535	Gm35154	-1.14837	2.1397	15.4068	8.66761e-05	0.000788189
ENSMUSG00000062619	2310039H08Rik	-1.14661	2.68568	16.2386	5.58459e-05	0.000544752
ENSMUSG00000044199	S1pr4	-1.14285	2.50531	20.028	7.63176e-06	0.000106785
ENSMUSG00000035692	Isg15	-1.14085	2.58123	16.44	5.02143e-05	0.000499244
ENSMUSG00000100876	2810454H06Rik	-1.14072	0.696334	6.25137	0.0124097	0.0432608
ENSMUSG00000117007		-1.1343	1.02146	6.82008	0.00901384	0.0337467
ENSMUSG00000086604	Gm15510	-1.13118	1.02839	8.14485	0.00431836	0.0187034
ENSMUSG00000090778	Gm3235	-1.13033	2.19756	14.828	0.000117772	0.00101764
ENSMUSG00000066233	Tmem42	-1.12376	2.69518	18.3881	1.80175e-05	0.00021301
ENSMUSG00000106446	Gm42970	-1.12346	2.35397	11.5444	0.000679523	0.00424751
ENSMUSG00000104835	Gm5547	-1.12281	2.42434	17.4164	3.00226e-05	0.000324552
ENSMUSG00000008540	Mgst1	-1.1095	2.11246	12.4696	0.000413631	0.00284025
ENSMUSG00000028464	Tpm2	-1.10261	2.79769	6.14443	0.0131826	0.0452809
ENSMUSG00000020846	Rflnb	-1.10244	1.37834	7.26688	0.00702378	0.0277013
ENSMUSG00000062933	Gm10123	-1.10137	6.12116	28.0615	1.17519e-07	3.46612e-06
ENSMUSG00000081094	Rpl19-ps11	-1.09171	4.11223	11.9778	0.000538381	0.00352406
ENSMUSG00000094796	BC147527	-1.09056	2.85026	10.9457	0.000938212	0.00551772
ENSMUSG00000037683	Armc3	-1.07872	3.22868	27.5316	1.54552e-07	4.30419e-06
ENSMUSG00000096617	Gm5559	-1.07407	3.50416	26.2709	2.96724e-07	7.25641e-06
ENSMUSG00000087259	2610035D17Rik	-1.07325	3.07819	11.7796	0.000598831	0.00384252
ENSMUSG00000063234	Gpr84	-1.06674	6.54802	31.0505	2.51396e-08	9.83463e-07
ENSMUSG00000074063	Osgin1	-1.06529	3.76744	21.7074	3.17564e-06	5.23439e-05
ENSMUSG00000032231	Anxa2	-1.06373	3.9289	15.8935	6.70096e-05	0.000635849
ENSMUSG00000029059	Fam213b	-1.06207	4.663	33.4483	7.3183e-09	3.75835e-07
ENSMUSG00000045193	Cirbp	-1.05801	7.5288	32.7997	1.02159e-08	4.92169e-07
ENSMUSG00000014198	Zfp385c	-1.05526	3.1022	15.0974	0.000102104	0.00090576
ENSMUSG00000068758	Il3ra	-1.05099	3.55898	21.7396	3.12285e-06	5.16272e-05
ENSMUSG00000110545	Gm7730	-1.0462	1.36342	8.87105	0.00289728	0.0137374
ENSMUSG00000087331	1810021B22Rik	-1.04604	2.20946	14.9509	0.000110344	0.000961774
ENSMUSG00000021298	Gpr132	-1.0423	1.8649	8.2338	0.00411173	0.0179767
ENSMUSG00000024675	Ms4a4c	-1.04204	2.26475	11.8614	0.000573087	0.0037043
ENSMUSG00000051456	Hspb3	-1.04101	4.17213	26.874	2.17165e-07	5.69841e-06
ENSMUSG00000017652	Cd40	-1.04006	1.45429	8.99692	0.00270435	0.0129941
ENSMUSG00000030588	Yif1b	-1.0356	5.43427	47.9018	4.48105e-12	1.0829e-09
ENSMUSG00000101505	1700109G14Rik	-1.03028	1.47541	7.56004	0.00596768	0.0242314
ENSMUSG00000031821	Gins2	-1.0295	1.73772	10.7948	0.00101786	0.00590877
ENSMUSG00000073421	H2-Ab1	-1.0272	7.76812	28.234	1.07498e-07	3.22128e-06
ENSMUSG00000068240	Gm11808	-1.02701	5.75309	21.2619	4.00619e-06	6.34511e-05
ENSMUSG00000075010	AW112010	-1.01673	3.51987	30.7841	2.88391e-08	1.08567e-06
ENSMUSG00000056737	Capg	-1.01294	5.28012	48.4565	3.37704e-12	9.19968e-10
ENSMUSG00000071497	Nutf2-ps1	-1.00774	1.98942	7.15135	0.00749075	0.0292124
ENSMUSG00000107751	Gm6749	-1.0066	2.47933	14.6987	0.000126136	0.00107503
ENSMUSG00000009687	Fxyd5	-1.00579	4.38868	19.3927	1.06414e-05	0.000139514
ENSMUSG00000057836	Xlr3a	4.75687	0.00715087	24.645	6.89227e-07	1.45137e-05
ENSMUSG00000075014	Gm10800	3.91958	4.72869	8.30674	0.00394982	0.0174213
ENSMUSG00000109640	Gm45413	3.64715	-0.556055	17.6594	2.64205e-05	0.000293229
ENSMUSG00000019232	Etnppl	3.4604	0.162426	11.2078	0.00081453	0.00491903
ENSMUSG00000107505	Gm18009	3.43761	0.406815	26.4742	2.67082e-07	6.70299e-06
ENSMUSG00000086331	Gm16310	3.43608	-0.31165	12.0807	0.000509477	0.00337317
ENSMUSG00000091558	Gm17227	3.17113	-0.383663	15.0336	0.000105612	0.00092972
ENSMUSG00000084088	Gm12941	3.07743	-0.33401	8.44956	0.00365131	0.0163746
ENSMUSG00000106254	Gm42907	2.99415	-0.0968529	10.4753	0.00120982	0.00680687
ENSMUSG00000087129	Gm16316	2.94873	0.596713	15.7014	7.41704e-05	0.000689389
ENSMUSG00000115148	AC107711.1	2.91963	0.119213	15.1425	9.96932e-05	0.000887524
ENSMUSG00000106980	Gm43690	2.72128	-0.425296	9.83045	0.00171646	0.00900483
ENSMUSG00000052105	Mtcl1	2.67435	0.900185	10.2167	0.00139172	0.00761586
ENSMUSG00000115813	AC167565.2	2.66321	-0.400342	12.1205	0.000498701	0.00330914
ENSMUSG00000082936	Gm16166	2.64424	-0.12173	9.54775	0.00200195	0.010199
ENSMUSG00000090459	Gm17210	2.59275	-0.41061	10.1534	0.00144034	0.00781058
ENSMUSG00000029778	Adcyap1r1	2.58628	1.25639	13.7042	0.000213978	0.00165686
ENSMUSG00000038094	Atp13a4	2.57897	0.491069	12.1036	0.000503251	0.00333637
ENSMUSG00000006403	Adamts4	2.57581	0.399322	10.9212	0.000950719	0.00557302
ENSMUSG00000104280	Rps2-ps11	2.52446	-0.262984	7.75583	0.00535394	0.0222581
ENSMUSG00000110077	Gm45632	2.48031	0.209244	10.1391	0.00145154	0.00785708
ENSMUSG00000083465	Gm11652	2.46258	0.197184	11.1424	0.00084377	0.0050488
ENSMUSG00000110458	Gm21769	2.42912	-0.342653	8.48013	0.00359047	0.0162015
ENSMUSG00000096841	Gm25596	2.40756	0.136358	8.59563	0.00336971	0.0154257
ENSMUSG00000103076	Gm37902	2.34407	0.454165	14.2609	0.000159134	0.00130391
ENSMUSG00000063297	Luzp2	2.3009	0.582258	9.61702	0.00192783	0.00987847
ENSMUSG00000109727	Gm45464	2.24595	-0.240696	9.99322	0.00157117	0.00836217
ENSMUSG00000083687	Gm15154	2.23883	0.687396	18.0942	2.1024e-05	0.000241752
ENSMUSG00000091784	Gm17022	2.23721	-0.273521	7.56503	0.00595115	0.0241793
ENSMUSG00000084984	Far1os	2.22342	1.13035	21.5292	3.48479e-06	5.65071e-05
ENSMUSG00000103869	Gm37420	2.20015	1.24743	11.5243	0.00068692	0.00428303
ENSMUSG00000109429	Gm45223	2.19233	3.12398	23.7564	1.09332e-06	2.13296e-05
ENSMUSG00000107390	Gm43323	2.15277	-0.026273	6.31879	0.0119465	0.0420176
ENSMUSG00000092758	Gm25026	2.1226	-0.556002	5.98576	0.0144219	0.0487661
ENSMUSG00000107086	Gm43808	2.12236	-0.460411	7.13767	0.00754812	0.0293284
ENSMUSG00000082855	Gm14537	2.11976	-0.0663078	7.67821	0.00558917	0.0230505
ENSMUSG00000087478	4930506C21Rik	2.11373	2.04147	34.4197	4.44199e-09	2.48337e-07
ENSMUSG00000103088	Pcdhgb6	2.09951	0.609503	12.1849	0.00048179	0.00322694
ENSMUSG00000103900	Gm37500	2.09741	-0.35615	6.3782	0.0115531	0.0408801
ENSMUSG00000035805	Mlc1	2.08557	0.98789	8.18962	0.00421308	0.0183306
ENSMUSG00000104292	Gm38042	2.06628	2.17649	17.6409	2.66793e-05	0.000295444
ENSMUSG00000104966	Gm43273	2.05359	0.289074	7.04181	0.00796284	0.0305681
ENSMUSG00000098062	Gm26931	2.04499	0.678831	16.9084	3.9228e-05	0.000407031
ENSMUSG00000068748	Ptprz1	2.04099	1.91613	11.2757	0.000785267	0.00476921
ENSMUSG00000112744	Gm48880	2.02526	-0.250222	8.48779	0.00357537	0.0161501
ENSMUSG00000105643	Gm42611	2.01808	0.279941	9.2724	0.00232633	0.0115683
ENSMUSG00000111160	Gm48855	2.01242	-0.136904	8.28063	0.00400702	0.0176175
ENSMUSG00000021340	Gpld1	2.01195	0.703129	7.62782	0.00574749	0.0235286
ENSMUSG00000113183	Gm47664	2.00989	0.231892	6.73459	0.00945611	0.0350458
ENSMUSG00000114612	Gm47550	1.98576	1.22802	11.7216	0.000617777	0.0039321
ENSMUSG00000097457	2310031A07Rik	1.98245	0.152718	8.62218	0.00332094	0.0152724
ENSMUSG00000097158	Gm26516	1.971	0.341795	12.0123	0.000528504	0.00347764
ENSMUSG00000095913	Gm21844	1.95808	-0.0569122	8.28933	0.00398786	0.0175581
ENSMUSG00000060961	Slc4a4	1.95417	1.98213	11.3192	0.000767113	0.00467412
ENSMUSG00000030310	Slc6a1	1.95205	2.88275	13.5336	0.000234327	0.00178946
ENSMUSG00000103973	BC055308	1.93408	0.19141	7.21423	0.00723278	0.0283614
ENSMUSG00000117313		1.93185	0.310836	6.22035	0.012629	0.0438215
ENSMUSG00000084433	Gm25945	1.92394	-0.332881	5.97644	0.0144982	0.0489911
ENSMUSG00000096991	Gm26789	1.9125	1.16809	10.2049	0.00140068	0.00763545
ENSMUSG00000094281	Gm8034	1.91163	-0.174347	5.95553	0.0146712	0.0495198
ENSMUSG00000054178	Gm9938	1.90548	1.63049	12.749	0.000356196	0.00250911
ENSMUSG00000102776	Gm38162	1.90262	-0.322726	6.23691	0.0125114	0.0435502
ENSMUSG00000062209	Erbb4	1.8956	0.0270989	6.00997	0.0142253	0.0482547
ENSMUSG00000051844	B230319C09Rik	1.89221	0.429428	6.75378	0.00935494	0.0348063
ENSMUSG00000107102	Gm42726	1.87538	-0.236811	6.66818	0.00981494	0.0360788
ENSMUSG00000083111	Gm14421	1.86547	0.0124336	9.01624	0.00267592	0.0128959
ENSMUSG00000024209	1700061G19Rik	1.85586	0.245326	7.53919	0.00603713	0.0244603
ENSMUSG00000105304	Gm43696	1.85289	-0.137579	6.04399	0.0139537	0.047613
ENSMUSG00000113894	Gm48838	1.83828	2.1711	25.5206	4.37694e-07	1.00122e-05
ENSMUSG00000108551	Gm20274	1.83587	0.454241	7.44366	0.00636602	0.0256266
ENSMUSG00000105824	Gm43466	1.83018	0.459706	8.78984	0.00302913	0.0142319
ENSMUSG00000033981	Gria2	1.8297	1.18626	13.7544	0.000208334	0.00161902
ENSMUSG00000102850	Gm37082	1.82788	0.948992	12.4928	0.000408521	0.00281161
ENSMUSG00000108823	Gm18959	1.8203	0.074241	8.30901	0.00394489	0.0174162
ENSMUSG00000117219		1.81754	1.6412	12.97	0.000316528	0.00228446
ENSMUSG00000104443	4932442E05Rik	1.79156	2.01639	23.0803	1.55375e-06	2.8705e-05
ENSMUSG00000045515	Pou3f3	1.79015	0.431448	6.04627	0.0139357	0.047563
ENSMUSG00000102302	Gm38190	1.78884	2.9593	21.6798	3.22159e-06	5.29847e-05
ENSMUSG00000114370	Gm46411	1.7888	1.57237	10.2555	0.00136276	0.00749017
ENSMUSG00000103756	Gm37285	1.76907	0.788653	12.5081	0.000405195	0.00279256
ENSMUSG00000107041	Gm42735	1.76788	0.38983	10.4684	0.00121435	0.0068283
ENSMUSG00000094410	Gm38394	1.75273	2.9147	30.357	3.59413e-08	1.30075e-06
ENSMUSG00000040055	Gjb6	1.74546	1.20101	6.29836	0.012085	0.0423753
ENSMUSG00000102413	Gm36937	1.73783	0.0700422	8.71345	0.00315871	0.0146903
ENSMUSG00000105358	Gm43099	1.73372	0.348379	11.0113	0.000905587	0.00535243
ENSMUSG00000113491	Gm19221	1.7318	1.38084	11.4945	0.000698015	0.00433417
ENSMUSG00000085732	Gm4279	1.73136	0.217113	8.79872	0.00301441	0.0141777
ENSMUSG00000106087	Gm43609	1.71865	1.11086	12.1676	0.000486271	0.00324886
ENSMUSG00000082715	Gm11633	1.7142	0.755597	6.14216	0.0131996	0.0453288
ENSMUSG00000102145	Gm38056	1.70104	1.24844	11.536	0.000682602	0.00425965
ENSMUSG00000097876	Gm16892	1.69634	1.59476	13.6541	0.000219757	0.00169113
ENSMUSG00000085767	Gm13563	1.68188	2.3999	35.5432	2.49451e-09	1.57702e-07
ENSMUSG00000111793	Gm47950	1.68057	0.962679	10.0335	0.00153723	0.00822584
ENSMUSG00000107802	1700126G02Rik	1.6685	-0.193055	7.08392	0.00777789	0.0300273
ENSMUSG00000090194	Gm16161	1.65908	0.756584	9.81189	0.00173387	0.00906756
ENSMUSG00000029657	Hsph1	1.6566	5.28212	31.6972	1.80179e-08	7.53558e-07
ENSMUSG00000102929	Gm37154	1.65273	0.340914	10.8489	0.000988527	0.00576095
ENSMUSG00000020950	Foxg1	1.65078	-0.311906	6.10833	0.0134546	0.0460883
ENSMUSG00000102976	Zc3h11a	1.64835	4.3948	59.2324	1.40111e-14	1.61483e-11
ENSMUSG00000031980	Agt	1.64452	1.96649	6.65874	0.00986708	0.0362083
ENSMUSG00000091952	Gm17709	1.64376	1.3052	13.1934	0.000280932	0.00207554
ENSMUSG00000027699	Ect2	1.63318	0.725115	13.4591	0.000243826	0.00185308
ENSMUSG00000074569	Gcnt7	1.62263	0.483019	6.22724	0.01258	0.0437321
ENSMUSG00000006522	Itih3	1.62252	2.12435	6.51177	0.0107163	0.038606
ENSMUSG00000102496	Gm36989	1.622	1.45042	13.0585	0.000301915	0.00220019
ENSMUSG00000050953	Gja1	1.61599	2.81413	7.9114	0.00491243	0.0208036
ENSMUSG00000109279	Gm45220	1.61434	3.81469	37.0383	1.1583e-09	8.50723e-08
ENSMUSG00000110422	Gm17999	1.60868	0.405172	7.70415	0.00550941	0.0227717
ENSMUSG00000068130	Zfp442	1.60834	0.780725	7.95542	0.00479437	0.0204074
ENSMUSG00000023087	Noct	1.60454	1.05051	8.4201	0.00371095	0.0165726
ENSMUSG00000048148	Nwd1	1.60149	2.08571	13.8965	0.000193155	0.00151787
ENSMUSG00000103928	Gm37893	1.58869	3.63243	45.9626	1.20531e-11	2.1758e-09
ENSMUSG00000106251	Gm42658	1.58638	1.46827	16.7156	4.34234e-05	0.00044256
ENSMUSG00000108465	Gm45110	1.58495	0.756618	6.8369	0.00892937	0.0335058
ENSMUSG00000103821	D430013B06Rik	1.58316	0.413231	6.03207	0.0140483	0.0478411
ENSMUSG00000084899	Gm15344	1.58213	2.36731	24.9759	5.80506e-07	1.2569e-05
ENSMUSG00000104546	Gm43858	1.57741	2.5828	10.4953	0.00119681	0.00674633
ENSMUSG00000108563	Gm44686	1.57555	2.14549	18.5365	1.66678e-05	0.000200107
ENSMUSG00000109390	Gm45718	1.57143	0.166224	7.17411	0.0073963	0.0288741
ENSMUSG00000026830	Ermn	1.56804	0.879837	9.04258	0.00263763	0.01274
ENSMUSG00000107749	Gm44321	1.56727	2.18438	18.6997	1.53008e-05	0.000186383
ENSMUSG00000052565	Hist1h1d	1.56702	0.774935	9.05355	0.00262186	0.0126761
ENSMUSG00000087312	Gm13833	1.5659	0.660981	6.99693	0.00816495	0.0311683
ENSMUSG00000117333		1.56305	0.437996	10.2912	0.00133668	0.00737931
ENSMUSG00000090877	Hspa1b	1.56086	6.632	9.43584	0.00212786	0.010731
ENSMUSG00000020288	Ahsa2	1.56028	4.20411	49.8268	1.67935e-12	5.99089e-10
ENSMUSG00000097275	Gm26648	1.55242	1.64234	12.9873	0.000313604	0.0022693
ENSMUSG00000109428	Gm45698	1.55042	0.00137569	8.67513	0.00322581	0.0149082
ENSMUSG00000072612	Gm10382	1.54924	2.51141	15.0609	0.000104096	0.000919072
ENSMUSG00000113047	Gm47469	1.54385	1.73245	17.8692	2.36616e-05	0.000267569
ENSMUSG00000098889	Gm27206	1.54181	0.720892	6.77421	0.00924846	0.0344958
ENSMUSG00000043872	Zmym1	1.53846	2.84221	25.6741	4.0422e-07	9.37527e-06
ENSMUSG00000015093	Clic3	1.5382	1.02406	9.35947	0.00221837	0.0110941
ENSMUSG00000024411	Aqp4	1.53442	1.29414	6.99718	0.00816381	0.0311683
ENSMUSG00000103793	Pcdhga6	1.5313	-0.0603796	6.64465	0.00994539	0.0364053
ENSMUSG00000025931	Paqr8	1.53095	2.06995	14.0106	0.000181787	0.00144494
ENSMUSG00000108709	4933431G14Rik	1.52964	1.56265	11.8954	0.00056273	0.00364988
ENSMUSG00000105710	Gm43859	1.52084	1.35238	11.9249	0.000553875	0.00360344
ENSMUSG00000109363	Gm44668	1.51356	0.61684	7.02885	0.0080207	0.0307272
ENSMUSG00000087502	Gm16091	1.50512	0.577106	6.01948	0.0141488	0.0480599
ENSMUSG00000107320	Gm42549	1.50501	0.560763	7.31267	0.00684701	0.0272263
ENSMUSG00000097335	Gm26563	1.5046	0.277338	7.7242	0.00544854	0.0225778
ENSMUSG00000104369	Gm38082	1.50255	1.04079	10.8129	0.00100797	0.00586044
ENSMUSG00000084834	4930565N06Rik	1.49819	1.26338	8.85226	0.00292726	0.0138661
ENSMUSG00000019971	Cep290	1.49482	2.91469	33.4467	7.32456e-09	3.75835e-07
ENSMUSG00000107560	Gm44199	1.48661	2.44217	20.458	6.09538e-06	8.91993e-05
ENSMUSG00000025912	Mybl1	1.48014	0.48792	8.33262	0.00389395	0.0172411
ENSMUSG00000115624	AC154640.4	1.47933	3.43018	29.5699	5.39365e-08	1.78395e-06
ENSMUSG00000107116	Gm43274	1.47807	0.128183	6.99967	0.00815248	0.0311604
ENSMUSG00000086502	B130055M24Rik	1.47476	1.44604	13.9146	0.000191308	0.00150862
ENSMUSG00000050954	Zfp169	1.47128	3.68613	32.9027	9.68875e-09	4.72855e-07
ENSMUSG00000110914	Gm48611	1.46721	1.75985	10.4818	0.00120556	0.00679058
ENSMUSG00000114344	Gm17941	1.46361	1.3046	9.70768	0.001835	0.00948717
ENSMUSG00000020734	Grin2c	1.46309	1.4033	7.83091	0.00513602	0.0215434
ENSMUSG00000005089	Slc1a2	1.46179	4.13016	8.86875	0.00290094	0.0137503
ENSMUSG00000034488	Edil3	1.456	1.04252	7.96345	0.00477315	0.0203347
ENSMUSG00000097139	Gm26626	1.45495	0.484646	7.39421	0.0065434	0.0262279
ENSMUSG00000114253	Gm47798	1.45347	2.32107	15.0284	0.000105906	0.000931213
ENSMUSG00000003282	Plag1	1.45342	1.63961	12.5052	0.000405823	0.00279561
ENSMUSG00000097234	Gm26518	1.4466	0.479486	8.71325	0.00315905	0.0146903
ENSMUSG00000106099	Gm42664	1.43231	2.40729	12.9538	0.000319269	0.00229665
ENSMUSG00000105272	Gm43071	1.42355	2.63795	21.0406	4.49647e-06	6.93113e-05
ENSMUSG00000026064	Ptp4a1	1.42318	0.9441	9.16587	0.00246571	0.0120929
ENSMUSG00000104214	Gm36638	1.41916	1.53396	15.238	9.4776e-05	0.000848792
ENSMUSG00000108738	Gm44777	1.41845	1.13849	10.5348	0.00117148	0.00663353
ENSMUSG00000085591	Gm13479	1.4169	3.22208	25.729	3.92887e-07	9.15494e-06
ENSMUSG00000061451	Tmem151a	1.41385	1.13113	10.2343	0.00137852	0.00754636
ENSMUSG00000026276	Sept2	1.40678	2.4391	27.097	1.93496e-07	5.1665e-06
ENSMUSG00000112256	Gm48077	1.39425	0.815548	8.41248	0.00372654	0.0166323
ENSMUSG00000086965	Rtl10	1.39353	0.772766	10.1572	0.00143738	0.00779732
ENSMUSG00000109005	Gm45221	1.39322	2.0857	12.2031	0.000477103	0.00320271
ENSMUSG00000084946	Dlx1as	1.39063	1.04194	10.5188	0.00118164	0.00668097
ENSMUSG00000108347	Gm19187	1.38798	0.619575	7.82153	0.00516273	0.0216252
ENSMUSG00000109539	Gm44667	1.36521	4.61275	19.2327	1.15716e-05	0.000148566
ENSMUSG00000102562	Gm37694	1.36444	0.680175	8.45721	0.00363599	0.0163254
ENSMUSG00000106767	Gm42727	1.35433	0.604625	6.82959	0.00896598	0.0336095
ENSMUSG00000109847	Gm45278	1.35428	0.886421	6.38426	0.0115137	0.0407728
ENSMUSG00000105572	Gm43300	1.35105	2.2456	8.24729	0.00408128	0.0178644
ENSMUSG00000093734	Gm25082	1.35001	0.743077	8.25452	0.00406507	0.017809
ENSMUSG00000085713	Gm15736	1.34964	1.63202	8.149	0.0043085	0.0186789
ENSMUSG00000052407	Ccdc171	1.34792	2.1562	18.7065	1.52462e-05	0.00018587
ENSMUSG00000111264	E030022I16Rik	1.34545	1.88681	10.2431	0.001372	0.0075327
ENSMUSG00000091971	Hspa1a	1.34223	5.69376	8.59693	0.00336731	0.0154194
ENSMUSG00000110397	Gm45540	1.33925	3.86826	24.4643	7.56982e-07	1.56872e-05
ENSMUSG00000108573	Gm44986	1.33434	0.567802	8.48671	0.0035775	0.0161548
ENSMUSG00000078889	Gm14288	1.33289	2.02461	17.8019	2.45132e-05	0.000276359
ENSMUSG00000048022	Tmem229a	1.33023	1.46611	7.33349	0.00676816	0.0269988
ENSMUSG00000107331	Gm42732	1.32905	2.76571	25.0451	5.60037e-07	1.21963e-05
ENSMUSG00000105742	Gm42748	1.32722	1.58612	8.34876	0.00385951	0.0171289
ENSMUSG00000046108	Il17c	1.32709	0.450822	6.66352	0.00984064	0.0361378
ENSMUSG00000027840	Wnt2b	1.32395	0.751868	6.71033	0.00958561	0.0354445
ENSMUSG00000036501	Fam13b	1.3234	4.94252	46.5545	8.91068e-12	1.82889e-09
ENSMUSG00000107317	Gm19719	1.32305	3.01671	20.0629	7.49375e-06	0.000105426
ENSMUSG00000074220	Zfp382	1.31997	1.99413	10.1509	0.00144233	0.00781572
ENSMUSG00000102374	Gm38387	1.31773	0.60202	6.31769	0.0119539	0.0420338
ENSMUSG00000027536	Chmp4c	1.30306	1.20519	9.86905	0.00168082	0.00884572
ENSMUSG00000107756	Gm44164	1.30049	1.72013	7.89543	0.00495598	0.0209053
ENSMUSG00000108883	Gm44623	1.2981	0.954753	7.14436	0.00752001	0.0292884
ENSMUSG00000038156	Spon1	1.29554	0.848743	5.98779	0.0144052	0.0487319
ENSMUSG00000034218	Atm	1.2942	4.20218	25.1666	5.25846e-07	1.16035e-05
ENSMUSG00000073125	Xlr3b	1.29117	2.55057	7.4571	0.00631867	0.0254702
ENSMUSG00000105632	Gm43272	1.28976	3.9536	24.6148	7.00114e-07	1.46711e-05
ENSMUSG00000073716	Gm13241	1.28658	1.12782	9.23168	0.00237863	0.0117543
ENSMUSG00000087036	Gm11748	1.28329	1.60109	9.68346	0.00185934	0.00959644
ENSMUSG00000108753	Gm45094	1.2825	1.62034	11.4886	0.000700242	0.0043462
ENSMUSG00000074824	Rslcan18	1.27211	0.344199	6.06555	0.0137844	0.0471318
ENSMUSG00000108064	Gm44423	1.27185	2.77226	12.1346	0.000494957	0.00328867
ENSMUSG00000080530	Gm25540	1.27138	1.15308	6.43872	0.0111659	0.039833
ENSMUSG00000097295	Hmgb1-ps8	1.26662	1.99027	9.9581	0.00160144	0.00848456
ENSMUSG00000029638	Glcci1	1.26235	0.610718	6.22034	0.0126291	0.0438215
ENSMUSG00000034161	Scx	1.26137	1.32248	6.74596	0.009396	0.0349071
ENSMUSG00000069892	9930111J21Rik2	1.26072	5.95396	46.3297	9.99357e-12	1.94459e-09
ENSMUSG00000104399	Gm37963	1.25027	2.81252	28.7989	8.02978e-08	2.51169e-06
ENSMUSG00000085118	Gm15774	1.24928	2.5422	8.70655	0.0031707	0.0147216
ENSMUSG00000041180	Hectd2	1.24685	1.50871	9.13052	0.0025138	0.0122845
ENSMUSG00000102570	Gm37968	1.24627	1.01016	10.914	0.000954384	0.00559231
ENSMUSG00000100201	Gm29093	1.2367	1.73679	12.1236	0.000497885	0.00330665
ENSMUSG00000074519	Zfp971	1.22901	2.38854	19.0805	1.25317e-05	0.000157917
ENSMUSG00000087785	Gm23172	1.22898	1.75209	6.4182	0.0112957	0.0402097
ENSMUSG00000040260	Daam2	1.22746	2.39281	9.94485	0.00161301	0.00854282
ENSMUSG00000044098	Rsbn1	1.22581	4.86237	30.8566	2.77818e-08	1.05648e-06
ENSMUSG00000024795	Kif20b	1.21952	1.85522	15.4785	8.345e-05	0.000763067
ENSMUSG00000056342	Usp34	1.21698	5.71898	56.681	5.12577e-14	4.26663e-11
ENSMUSG00000107962	Gm43980	1.21529	4.1156	24.5592	7.20598e-07	1.50582e-05
ENSMUSG00000109498	Gm45222	1.21339	3.70748	19.2563	1.14293e-05	0.000147244
ENSMUSG00000108486	Gm44836	1.21182	1.30749	6.63226	0.0100148	0.0365445
ENSMUSG00000001998	Ap4e1	1.21077	4.40129	26.5558	2.56035e-07	6.4582e-06
ENSMUSG00000108365	Gm44951	1.20612	3.10572	7.60514	0.00582021	0.023729
ENSMUSG00000068740	Celsr2	1.20579	1.02197	8.81637	0.0029854	0.0140661
ENSMUSG00000039431	Mtmr7	1.20473	1.5076	11.4731	0.000706102	0.00437532
ENSMUSG00000041343	Ankrd42	1.20142	0.683876	6.22119	0.0126231	0.0438209
ENSMUSG00000090093	Gm14399	1.20112	1.70371	8.48866	0.00357366	0.0161472
ENSMUSG00000083899	Gm12346	1.19927	1.19475	9.17948	0.00244744	0.0120269
ENSMUSG00000103230	Gm17970	1.1983	1.80435	8.93518	0.0027973	0.013352
ENSMUSG00000035164	Zc3h12c	1.19595	4.36036	33.5919	6.79743e-09	3.58612e-07
ENSMUSG00000024018	Ccdc167	1.19486	2.89528	13.3466	0.000258887	0.00194334
ENSMUSG00000031431	Tsc22d3	1.19441	6.17372	47.4955	5.5129e-12	1.2404e-09
ENSMUSG00000107000	Gm43481	1.19398	2.84124	10.0584	0.00151653	0.0081354
ENSMUSG00000022899	Slc15a2	1.18928	5.41197	14.1011	0.000173247	0.00139183
ENSMUSG00000060445	Sycp2	1.18928	1.80744	7.27643	0.00698651	0.0275907
ENSMUSG00000024298	Zfp871	1.18543	5.19311	27.6673	1.44078e-07	4.08076e-06
ENSMUSG00000116908	Gm49599	1.18543	2.38546	8.95341	0.00276952	0.013249
ENSMUSG00000055430	Nap1l5	1.18253	0.865869	6.76854	0.00927787	0.0345625
ENSMUSG00000073664	Nbeal1	1.18205	5.34102	63.5491	1.56415e-15	3.90595e-12
ENSMUSG00000069893	9930111J21Rik1	1.18116	4.51533	30.4735	3.38459e-08	1.24598e-06
ENSMUSG00000033799	Fam208b	1.17398	5.55906	41.7374	1.04391e-10	1.19397e-08
ENSMUSG00000046168	Kcnrg	1.1735	1.87279	7.27957	0.00697431	0.0275642
ENSMUSG00000108037	Gm44597	1.17312	2.06324	14.9901	0.000108075	0.000945845
ENSMUSG00000046240	Hepacam	1.17115	1.61461	7.66003	0.00564574	0.0232387
ENSMUSG00000096954	Gdap10	1.16995	1.88484	7.14336	0.00752419	0.0292884
ENSMUSG00000086491	Gm13291	1.1671	2.10899	11.022	0.000900359	0.00532783
ENSMUSG00000101309	Gm29397	1.16245	1.06124	6.43232	0.0112062	0.0399293
ENSMUSG00000059149	Mfsd4a	1.16113	4.32426	21.1646	4.21467e-06	6.61241e-05
ENSMUSG00000104814	Gm42979	1.15657	2.6494	20.4206	6.21578e-06	9.05943e-05
ENSMUSG00000107227	Gm42559	1.15344	1.59211	10.2363	0.00137701	0.00754636
ENSMUSG00000087639	Gm15512	1.15272	1.78678	9.9672	0.00159354	0.0084457
ENSMUSG00000035370	Adat3	1.15257	0.629204	6.67514	0.00977671	0.0359824
ENSMUSG00000089774	Slc5a3	1.1514	4.1829	23.6894	1.13202e-06	2.19988e-05
ENSMUSG00000091515	Zfp422-ps	1.14674	0.961079	6.02029	0.0141424	0.0480599
ENSMUSG00000029161	Cgref1	1.1411	1.53338	6.89499	0.00864377	0.0326632
ENSMUSG00000028028	Alpk1	1.13988	3.74645	28.5017	9.3617e-08	2.88614e-06
ENSMUSG00000058385	Hist1h2bg	1.1391	2.38263	14.0235	0.000180539	0.0014396
ENSMUSG00000113836	AC124426.1	1.13376	1.40554	9.09257	0.00256649	0.0124809
ENSMUSG00000109836	Gm45884	1.1324	3.45323	12.1603	0.000488186	0.00325812
ENSMUSG00000036928	Stag3	1.12628	3.34093	25.7497	3.88686e-07	9.07115e-06
ENSMUSG00000093772	4931403E22Rik	1.12552	1.13786	5.9372	0.0148245	0.0499585
ENSMUSG00000086247	Gm15787	1.12475	1.50334	7.86599	0.00503732	0.0212066
ENSMUSG00000025019	Lcor	1.11844	3.94824	12.9448	0.000320819	0.00230429
ENSMUSG00000085408	C530005A16Rik	1.11727	1.23485	9.11441	0.00253603	0.0123528
ENSMUSG00000086826	Gm11739	1.11221	2.15325	8.85171	0.00292814	0.0138661
ENSMUSG00000022360	Atad2	1.11153	4.15745	24.6437	6.897e-07	1.45137e-05
ENSMUSG00000031210	Gpr165	1.10927	4.68912	16.9562	3.82519e-05	0.00039773
ENSMUSG00000092341	Malat1	1.10918	9.82528	23.9966	9.65084e-07	1.92407e-05
ENSMUSG00000035161	Ints6	1.10724	4.32671	27.4383	1.62183e-07	4.47176e-06
ENSMUSG00000078866	Zfp970	1.10348	3.43453	16.5667	4.69695e-05	0.000471758
ENSMUSG00000112964	E430024I08Rik	1.10181	2.06463	14.6913	0.000126631	0.00107741
ENSMUSG00000048279	Sacs	1.10162	2.21283	11.6452	0.000643688	0.00405908
ENSMUSG00000032525	Nktr	1.09647	6.45216	31.793	1.71508e-08	7.30032e-07
ENSMUSG00000021706	Zfyve16	1.09506	4.94116	49.337	2.15555e-12	7.28838e-10
ENSMUSG00000079065	BC005561	1.09495	3.30788	12.977	0.00031535	0.00227925
ENSMUSG00000094132	Gm3264	1.08605	2.99369	12.3116	0.000450143	0.00305319
ENSMUSG00000097294	Gm26888	1.08242	2.72101	8.6574	0.00325735	0.0150262
ENSMUSG00000051149	Adnp	1.08138	2.2123	7.42347	0.00643787	0.025881
ENSMUSG00000043467	Zbtb37	1.07825	5.80871	25.3268	4.83939e-07	1.08872e-05
ENSMUSG00000103509	Gm38372	1.07702	2.95958	6.53986	0.0105483	0.0381661
ENSMUSG00000027959	Sass6	1.07084	2.87754	18.7777	1.46877e-05	0.000180086
ENSMUSG00000107846	Gm43963	1.06974	2.18201	6.52456	0.0106395	0.0384216
ENSMUSG00000037617	Spag1	1.06816	2.04195	11.324	0.000765117	0.00466472
ENSMUSG00000030660	Pik3c2a	1.06549	5.04386	22.1649	2.502e-06	4.29902e-05
ENSMUSG00000031303	Map3k15	1.06204	2.68938	17.9582	2.25805e-05	0.000257675
ENSMUSG00000025437	Usp33	1.05983	5.08006	30.0009	4.31841e-08	1.49775e-06
ENSMUSG00000026082	Rev1	1.05982	3.73247	17.6647	2.63476e-05	0.000292636
ENSMUSG00000033792	Atp7a	1.05864	4.97752	23.67	1.14351e-06	2.21074e-05
ENSMUSG00000042333	Tnfrsf14	1.05803	5.54891	36.8153	1.2987e-09	9.31025e-08
ENSMUSG00000086507	Adap2os	1.05377	4.8419	23.6729	1.14181e-06	2.21074e-05
ENSMUSG00000102780	Gm38253	1.04762	2.36483	12.9099	0.000326845	0.00233641
ENSMUSG00000112358	AC108802.1	1.04573	2.19628	10.0358	0.00153527	0.00821825
ENSMUSG00000022801	Lrch3	1.04519	4.52032	18.1308	2.06238e-05	0.000238785
ENSMUSG00000031010	Usp9x	1.04509	6.06936	40.4023	2.06697e-10	2.00526e-08
ENSMUSG00000084911	Gm16185	1.04295	3.37553	12.3863	0.000432494	0.0029495
ENSMUSG00000020108	Ddit4	1.04102	4.39925	10.2344	0.00137848	0.00754636
ENSMUSG00000026156	B3gat2	1.03776	1.5758	6.19524	0.0128094	0.0442628
ENSMUSG00000028312	Smc2	1.03759	3.36492	21.7479	3.10931e-06	5.15593e-05
ENSMUSG00000087556	Gm15764	1.03537	2.96565	13.7043	0.000213969	0.00165686
ENSMUSG00000102719	Gm37760	1.03276	1.81214	7.7698	0.00531271	0.0221067
ENSMUSG00000069808	Fam57a	1.02511	0.940147	6.1689	0.0130015	0.0448233
ENSMUSG00000047793	Sned1	1.02483	1.646	7.71186	0.00548591	0.0227084
ENSMUSG00000074269	Rec114	1.02431	1.67041	8.87631	0.00288895	0.0137065
ENSMUSG00000031425	Plp1	1.02329	5.80064	10.4592	0.00122038	0.00685341
ENSMUSG00000027939	Nup210l	1.02145	2.19012	12.9358	0.000322355	0.00230983
ENSMUSG00000025240	Sacm1l	1.01813	4.28269	21.6578	3.25883e-06	5.34798e-05
ENSMUSG00000028410	Dnaja1	1.01739	6.79386	25.9293	3.54154e-07	8.39603e-06
ENSMUSG00000072673	Gm10392	1.00767	2.12482	9.61229	0.0019328	0.00989717
ENSMUSG00000096780	Tmem181b-ps	1.00594	4.73381	41.8539	9.83558e-11	1.15558e-08
ENSMUSG00000010175	Prox1	1.00429	4.1698	30.0076	4.30354e-08	1.49605e-06
ENSMUSG00000028128	F3	1.00248	2.19461	7.77234	0.00530523	0.0220924

## Sheet: M WT CIH vs 5X CIH
	Gene name	logFC	logCPM	LR	PValue	FDR
ENSMUSG00000108850	Gm44914	-6.00987	-0.220876	47.696	4.97716e-12	5.7342e-11
ENSMUSG00000086675	Plxna4os2	-5.49812	-0.689395	30.2721	3.75495e-08	2.65267e-07
ENSMUSG00000075014	Gm10800	-4.15535	4.58229	10.038	0.00153346	0.00433324
ENSMUSG00000113557	Gm47657	-4.08537	-0.0707426	34.4429	4.38932e-09	3.5136e-08
ENSMUSG00000106980	Gm43690	-3.99924	-0.56212	23.1993	1.46047e-06	8.01959e-06
ENSMUSG00000064039	Ccr1l1	-3.94567	0.709018	55.3656	1.00073e-13	1.37581e-12
ENSMUSG00000100183	Gm28512	-3.85569	0.729154	47.7262	4.90089e-12	5.65514e-11
ENSMUSG00000030693	Klk10	-3.70458	-0.61543	22.602	1.99281e-06	1.06271e-05
ENSMUSG00000102423	Gm37465	-3.51931	0.473825	33.6444	6.61662e-09	5.20913e-08
ENSMUSG00000104910	Gm43331	-3.4426	-0.745479	18.8222	1.43489e-05	6.49324e-05
ENSMUSG00000109640	Gm45413	-3.42611	-0.582508	23.1234	1.51931e-06	8.33646e-06
ENSMUSG00000042800	Spata46	-3.36643	0.033269	29.2623	6.32153e-08	4.3134e-07
ENSMUSG00000094286	Gm12424	-3.35618	-0.608742	17.0655	3.61123e-05	0.000150651
ENSMUSG00000104091	Gm37317	-3.32687	2.03415	92.0789	8.32902e-22	2.29017e-20
ENSMUSG00000112711	Gm32552	-3.32283	0.142979	19.7642	8.76085e-06	4.15116e-05
ENSMUSG00000100738	2010106C02Rik	-3.28207	-0.580233	16.7449	4.27568e-05	0.000174821
ENSMUSG00000105358	Gm43099	-3.23906	0.0728444	30.8949	2.7239e-08	1.96177e-07
ENSMUSG00000082981	Polr2k-ps	-3.22173	-0.375419	15.5277	8.13033e-05	0.000311424
ENSMUSG00000031111	Igsf1	-3.22054	-0.339512	21.0325	4.51564e-06	2.2621e-05
ENSMUSG00000096175	Gm21761	-3.14608	-0.418372	18.9166	1.36561e-05	6.20821e-05
ENSMUSG00000059493	Nhs	-3.14458	0.311783	26.389	2.79131e-07	1.71336e-06
ENSMUSG00000074521	Gm14327	-3.13849	-0.62288	16.4165	5.08401e-05	0.000203539
ENSMUSG00000031210	Gpr165	-3.13743	4.16303	118.918	1.09133e-27	4.24844e-26
ENSMUSG00000086006	Gm13293	-3.12755	2.339	55.4064	9.80176e-14	1.35007e-12
ENSMUSG00000102831	Gm37382	-3.1033	-0.473841	14.1541	0.000168426	0.000601964
ENSMUSG00000096841	Gm25596	-3.05205	-0.0109734	20.6091	5.63281e-06	2.77569e-05
ENSMUSG00000103937	Gm37186	-3.0211	-0.549464	17.3662	3.08257e-05	0.000130548
ENSMUSG00000067356	B430203G13Rik	-3.00075	-0.689675	14.0254	0.000180362	0.00063937
ENSMUSG00000109363	Gm44668	-2.99969	0.294002	24.3936	7.85295e-07	4.48181e-06
ENSMUSG00000080613	Gm22151	-2.94176	0.228744	14.7307	0.000124011	0.000456298
ENSMUSG00000026572	Tbx19	-2.93967	0.439597	28.7417	8.27022e-08	5.52331e-07
ENSMUSG00000102894	Gm37851	-2.91898	1.94271	62.0334	3.37672e-15	5.3654e-14
ENSMUSG00000089145	Gm25265	-2.91668	-0.187101	20.0973	7.35988e-06	3.53604e-05
ENSMUSG00000104108	Gm37876	-2.90675	1.48223	51.3056	7.90482e-13	9.96897e-12
ENSMUSG00000044156	Hepacam2	-2.89615	-0.179187	16.3951	5.14182e-05	0.000205631
ENSMUSG00000027233	Patl2	-2.88675	-0.0314552	18.9202	1.36302e-05	6.19834e-05
ENSMUSG00000049653	Spatc1	-2.88393	-0.397625	17.3866	3.04969e-05	0.000129267
ENSMUSG00000040016	Ptger3	-2.87616	2.26649	65.2766	6.50912e-16	1.10171e-14
ENSMUSG00000107971	Gm44260	-2.8423	0.687561	21.2808	3.96685e-06	2.0021e-05
ENSMUSG00000103657	Gm37204	-2.82917	-0.554133	15.8369	6.90422e-05	0.000268774
ENSMUSG00000085009	Gm12977	-2.82908	0.774602	22.5471	2.05054e-06	1.09035e-05
ENSMUSG00000065738	Gm24494	-2.81842	-0.977898	8.66893	0.00323681	0.00837577
ENSMUSG00000107633	Gm44078	-2.80512	-0.353055	15.7436	7.25335e-05	0.00028074
ENSMUSG00000110124	Gm4247	-2.803	-0.31404	13.6269	0.000222966	0.000774984
ENSMUSG00000112317	Gm47580	-2.76958	-0.578121	11.9396	0.000549529	0.00173886
ENSMUSG00000104154	Gm38104	-2.75042	0.298998	18.3494	1.83877e-05	8.12697e-05
ENSMUSG00000112358	AC108802.1	-2.74986	1.72865	29.5692	5.39545e-08	3.72271e-07
ENSMUSG00000064325	Hhip	-2.74836	-0.138753	16.8419	4.06264e-05	0.000167266
ENSMUSG00000075596	B130006D01Rik	-2.74094	1.01075	22.0798	2.61552e-06	1.36285e-05
ENSMUSG00000084252	Gm12036	-2.73158	-0.0922507	19.7343	8.89891e-06	4.20984e-05
ENSMUSG00000104966	Gm43273	-2.71738	0.115031	17.0871	3.5705e-05	0.000149204
ENSMUSG00000104150	Gm44573	-2.6715	0.968076	38.0247	6.98533e-10	6.16183e-09
ENSMUSG00000085591	Gm13479	-2.67005	2.85451	55.5825	8.96199e-14	1.2425e-12
ENSMUSG00000092390	Gm20541	-2.64537	-0.187419	14.2288	0.000161875	0.000580654
ENSMUSG00000102863	Gm37639	-2.58676	0.00288247	16.1712	5.78677e-05	0.00022852
ENSMUSG00000108752	Gm45191	-2.57352	0.281417	24.3413	8.06894e-07	4.59445e-06
ENSMUSG00000103151	Gm38292	-2.57151	0.0814691	12.1538	0.000489887	0.00156927
ENSMUSG00000114598	D130062J10Rik	-2.56928	0.290689	19.877	8.25888e-06	3.936e-05
ENSMUSG00000062773	Tex101	-2.56496	0.272194	20.3968	6.29364e-06	3.06862e-05
ENSMUSG00000084199	Gm12422	-2.54847	0.707547	24.4356	7.68351e-07	4.39869e-06
ENSMUSG00000104918	Gm42944	-2.53715	4.72247	234.299	6.88231e-53	1.0181e-50
ENSMUSG00000104060	Gm37954	-2.5358	0.0949332	13.0475	0.000303684	0.001021
ENSMUSG00000083186	Gm11805	-2.51978	-0.12814	14.5166	0.000138927	0.00050557
ENSMUSG00000030268	Bcat1	-2.51693	0.305786	20.3556	6.43032e-06	3.12804e-05
ENSMUSG00000087443	Ppp1r18os	-2.51391	-0.37697	15.183	9.75801e-05	0.000367023
ENSMUSG00000005672	Kit	-2.51355	-0.200909	13.784	0.000205075	0.000718368
ENSMUSG00000105824	Gm43466	-2.50842	0.263471	16.2434	5.57044e-05	0.000220803
ENSMUSG00000034427	Myo15b	-2.50571	0.534479	8.06047	0.00452415	0.0112936
ENSMUSG00000096992	Gm26788	-2.49143	0.451528	17.7535	2.51454e-05	0.000108095
ENSMUSG00000106254	Gm42907	-2.48208	-0.10543	11.9311	0.000552034	0.00174604
ENSMUSG00000109652	Gm45555	-2.47851	-0.360172	11.6018	0.000658895	0.0020434
ENSMUSG00000022376	Adcy8	-2.47655	3.09306	88.7402	4.50226e-21	1.18088e-19
ENSMUSG00000076620	Ighj2	-2.46802	2.10712	41.1508	1.40923e-10	1.35457e-09
ENSMUSG00000087129	Gm16316	-2.46756	0.572312	17.2122	3.34277e-05	0.000140522
ENSMUSG00000061100	Retnla	-2.45271	-0.255145	10.1729	0.00142523	0.00406311
ENSMUSG00000021340	Gpld1	-2.44726	0.552182	15.5375	8.08863e-05	0.000309907
ENSMUSG00000022537	Tmem44	-2.4347	5.89455	242.308	1.23453e-54	1.92236e-52
ENSMUSG00000083687	Gm15154	-2.41898	0.573461	11.6581	0.000639246	0.00199039
ENSMUSG00000042282	Gucy2f	-2.40665	0.108939	15.0982	0.000102063	0.000382427
ENSMUSG00000062542	Syt9	-2.40208	-0.506764	8.54735	0.00346026	0.00888058
ENSMUSG00000029369	Afm	-2.38604	1.97469	56.6094	5.31576e-14	7.54665e-13
ENSMUSG00000104367	Gm38079	-2.38414	-0.0179145	13.9518	0.00018756	0.000662505
ENSMUSG00000085713	Gm15736	-2.38021	1.31316	20.8175	5.05184e-06	2.51368e-05
ENSMUSG00000113003	Gm47138	-2.36749	-0.241746	7.85893	0.00505704	0.0124433
ENSMUSG00000113423	Gm3791	-2.36254	-0.577753	5.56913	0.0182799	0.0379528
ENSMUSG00000090264	Eif4ebp3	-2.3477	0.126203	10.7749	0.00102887	0.00303491
ENSMUSG00000109680	Gm32098	-2.34078	1.19312	21.287	3.95411e-06	1.99635e-05
ENSMUSG00000034452	Slc24a1	-2.33582	-0.367256	10.6795	0.00108331	0.00317838
ENSMUSG00000108394	Gm45477	-2.33562	0.232703	16.7324	4.30396e-05	0.000175929
ENSMUSG00000039521	Foxp3	-2.33419	-0.106796	12.9105	0.000326749	0.00109037
ENSMUSG00000107583	Gm44104	-2.32505	-0.193706	7.53233	0.00606016	0.0145627
ENSMUSG00000114369	Gm41077	-2.31003	-0.177712	12.9466	0.000320501	0.00107169
ENSMUSG00000115877	AC118646.1	-2.30795	-0.572081	12.2099	0.000475376	0.00152775
ENSMUSG00000101308	Gm28989	-2.3041	-0.470969	7.27909	0.00697618	0.0164775
ENSMUSG00000021198	Unc79	-2.30354	0.873679	23.6063	1.182e-06	6.55125e-06
ENSMUSG00000020950	Foxg1	-2.29877	-0.489687	7.29365	0.00691988	0.0163628
ENSMUSG00000090080	Gm15872	-2.2983	-0.128674	11.9158	0.000556595	0.00175805
ENSMUSG00000076619	Ighj3	-2.2977	1.9135	30.3013	3.6987e-08	2.61543e-07
ENSMUSG00000102323	Gm37790	-2.29698	0.470721	14.8247	0.000117981	0.000436325
ENSMUSG00000112256	Gm48077	-2.2965	0.539233	10.856	0.00098477	0.00291953
ENSMUSG00000061186	Sfmbt2	-2.29577	1.35844	36.5308	1.50273e-09	1.2681e-08
ENSMUSG00000114050	Gm47666	-2.29253	-0.616767	8.94631	0.00278031	0.00731835
ENSMUSG00000097178	2310002F09Rik	-2.29022	-0.406579	10.3609	0.00128716	0.0037153
ENSMUSG00000082383	Gm9670	-2.28767	0.0861561	14.2003	0.000164341	0.000588643
ENSMUSG00000102989	Gm38318	-2.28455	-0.213423	12.8161	0.00034365	0.00114136
ENSMUSG00000059639	Clec4a4	-2.28217	-0.436792	11.5104	0.000692084	0.00213292
ENSMUSG00000108551	Gm20274	-2.2728	0.28935	11.5497	0.000677586	0.00209347
ENSMUSG00000096284	Tcstv1	-2.26857	0.423058	13.9524	0.000187496	0.000662437
ENSMUSG00000102635	Gm36638	-2.26619	-0.482494	8.02228	0.00462054	0.0114973
ENSMUSG00000102732	Gm37342	-2.26239	-0.241712	7.96274	0.00477499	0.0118379
ENSMUSG00000083235	Gm13246	-2.26003	-0.773645	5.33046	0.0209558	0.0427079
ENSMUSG00000103948	4930594C11Rik	-2.25979	0.336877	17.8666	2.36941e-05	0.000102517
ENSMUSG00000023868	Pde10a	-2.25342	0.508574	25.4551	4.52787e-07	2.68783e-06
ENSMUSG00000117313		-2.25314	0.172029	7.21815	0.00721701	0.0169597
ENSMUSG00000090582	Gm17024	-2.25191	-0.00239362	10.9395	0.000941384	0.00280538
ENSMUSG00000097479	Gm26582	-2.24881	-0.230371	15.22	9.56869e-05	0.000360912
ENSMUSG00000110677	Gm45777	-2.24062	0.259681	14.9888	0.00010815	0.000403192
ENSMUSG00000035448	Ccr3	-2.23546	0.837667	18.6608	1.5616e-05	7.0066e-05
ENSMUSG00000086076	Ncr3-ps	-2.23462	0.738216	24.4684	7.55381e-07	4.32779e-06
ENSMUSG00000097578	Gm26798	-2.21944	1.077	21.9155	2.84925e-06	1.47477e-05
ENSMUSG00000108536	Gm45059	-2.20706	-0.0528763	18.0447	2.15784e-05	9.38576e-05
ENSMUSG00000117294		-2.20686	-0.292535	6.05051	0.0139022	0.0299703
ENSMUSG00000103877	Gm21358	-2.20457	0.560337	10.8787	0.000972767	0.00288785
ENSMUSG00000111425	Gm47324	-2.19827	-0.413656	9.93853	0.00161855	0.00454588
ENSMUSG00000102570	Gm37968	-2.19363	0.709205	24.2807	8.32684e-07	4.73583e-06
ENSMUSG00000020334	Slc22a4	-2.19103	0.0490092	13.5086	0.000237475	0.000820405
ENSMUSG00000031548	Sfrp1	-2.18911	-0.160903	9.47201	0.00208631	0.00566914
ENSMUSG00000002076	Hsf2bp	-2.1875	2.80698	74.9674	4.78551e-18	9.95668e-17
ENSMUSG00000089679	Gm16299	-2.17513	-0.210838	9.95649	0.00160283	0.0045086
ENSMUSG00000092528	Nlrp1c-ps	-2.17009	4.79368	38.5681	5.28763e-10	4.7608e-09
ENSMUSG00000097876	Gm16892	-2.15624	1.39654	22.2803	2.35614e-06	1.2417e-05
ENSMUSG00000019982	Myb	-2.1556	-0.0816876	8.29292	0.00398	0.0100643
ENSMUSG00000003282	Plag1	-2.15318	1.38369	26.1147	3.21723e-07	1.95051e-06
ENSMUSG00000052105	Mtcl1	-2.14691	0.88881	8.6959	0.00318927	0.00827263
ENSMUSG00000109727	Gm45464	-2.14558	-0.287638	11.5538	0.000676111	0.00209063
ENSMUSG00000020682	Mmp28	-2.1413	2.89373	74.1205	7.34897e-18	1.50781e-16
ENSMUSG00000076618	Ighj4	-2.13977	2.31595	46.7359	8.12261e-12	9.14443e-11
ENSMUSG00000108365	Gm44951	-2.13144	2.7636	32.6672	1.09366e-08	8.34807e-08
ENSMUSG00000070390	Nlrp1b	-2.12634	6.35381	187.061	1.3927e-42	1.33781e-40
ENSMUSG00000102929	Gm37154	-2.12528	0.167669	18.9367	1.35127e-05	6.15055e-05
ENSMUSG00000038598	AI481877	-2.11933	0.220807	8.33888	0.00388054	0.00984139
ENSMUSG00000037922	Bank1	-2.11457	4.71727	151.385	8.63538e-35	5.06917e-33
ENSMUSG00000103756	Gm37285	-2.11454	0.622342	9.78558	0.00175885	0.00489626
ENSMUSG00000104292	Gm38042	-2.1144	2.04982	8.04316	0.00456759	0.011379
ENSMUSG00000036040	Adamtsl2	-2.11398	2.81365	53.5228	2.55614e-13	3.34629e-12
ENSMUSG00000114370	Gm46411	-2.11217	1.4028	23.6032	1.1839e-06	6.55931e-06
ENSMUSG00000085563	2210411M09Rik	-2.10218	0.508789	11.9771	0.000538591	0.00170644
ENSMUSG00000048191	Muc6	-2.10095	-0.0885432	7.0257	0.00803479	0.0186007
ENSMUSG00000047146	Tet1	-2.09726	3.13563	69.0828	9.44134e-17	1.7502e-15
ENSMUSG00000072673	Gm10392	-2.09157	1.742	22.0836	2.61025e-06	1.36155e-05
ENSMUSG00000078616	Trim30c	-2.09149	1.27161	31.6734	1.82405e-08	1.34849e-07
ENSMUSG00000115692	AC122821.1	-2.08644	0.0710763	9.88644	0.00166502	0.00465871
ENSMUSG00000104339	C130089K02Rik	-2.08521	1.20313	17.1022	3.54206e-05	0.000148309
ENSMUSG00000040165	Cd209c	-2.08063	0.164569	12.3883	0.000432025	0.00140677
ENSMUSG00000028040	Efna4	-2.0781	-0.420501	11.1943	0.000820514	0.00248117
ENSMUSG00000109243	Gm45867	-2.07397	3.5604	75.7955	3.14624e-18	6.66795e-17
ENSMUSG00000108333	Gm45095	-2.06805	0.00339027	9.71665	0.00182606	0.00504913
ENSMUSG00000097278	Gm26650	-2.06493	1.5157	18.8895	1.38516e-05	6.28935e-05
ENSMUSG00000107317	Gm19719	-2.06336	2.72085	25.1539	5.29335e-07	3.10856e-06
ENSMUSG00000021280	Exoc3l4	-2.06236	0.0830298	12.1929	0.000479706	0.00154066
ENSMUSG00000108042	B130021K23Rik	-2.06017	0.0492124	6.27239	0.0122634	0.0268799
ENSMUSG00000109429	Gm45223	-2.05569	3.02206	25.1747	5.23658e-07	3.07766e-06
ENSMUSG00000049612	Omg	-2.05129	0.60532	19.5444	9.8291e-06	4.59551e-05
ENSMUSG00000048329	Mfsd6l	-2.04787	-0.371212	7.56101	0.00596447	0.0143631
ENSMUSG00000024548	Setbp1	-2.04526	2.04681	26.2985	2.92512e-07	1.78968e-06
ENSMUSG00000105710	Gm43859	-2.03421	1.13805	29.4168	5.83687e-08	3.9993e-07
ENSMUSG00000097275	Gm26648	-2.02099	1.43339	28.4676	9.52788e-08	6.30067e-07
ENSMUSG00000097970	Gm27028	-2.01891	-0.0939392	7.57166	0.00592931	0.0142891
ENSMUSG00000108571	Gm6855	-2.01756	0.565631	18.2981	1.88893e-05	8.32129e-05
ENSMUSG00000097140	Gm26779	-2.01627	0.482627	13.4631	0.000243302	0.00083838
ENSMUSG00000074570	Cass4	-2.01009	4.28522	64.5751	9.2924e-16	1.548e-14
ENSMUSG00000086965	Rtl10	-2.00905	0.550859	10.2748	0.00134862	0.00386855
ENSMUSG00000102196	Gm38171	-2.00336	1.24771	33.7678	6.20974e-09	4.89952e-08
ENSMUSG00000038569	Rad9b	-2.00124	2.54173	36.5769	1.46757e-09	1.24144e-08
ENSMUSG00000003949	Hlf	-2.0002	4.07505	62.3607	2.85978e-15	4.56855e-14
ENSMUSG00000100465	Gm29264	-1.99371	1.40734	29.3673	5.98781e-08	4.09702e-07
ENSMUSG00000085433	Gm16001	-1.99106	-0.376753	7.24343	0.0071161	0.0167571
ENSMUSG00000035085	1700020L24Rik	-1.98378	1.35253	19.5221	9.94434e-06	4.64059e-05
ENSMUSG00000098620	Gm27209	-1.9791	0.468253	16.8261	4.09667e-05	0.000168425
ENSMUSG00000072647	Adam1a	-1.97671	0.97962	11.7634	0.00060406	0.00188999
ENSMUSG00000105304	Gm43696	-1.9751	-0.244466	6.7269	0.00949693	0.0215308
ENSMUSG00000079164	Tlr5	-1.96713	3.96925	64.541	9.45421e-16	1.57319e-14
ENSMUSG00000109205	Gm44954	-1.96491	-0.365211	7.23298	0.00715765	0.0168389
ENSMUSG00000048126	Col6a3	-1.96323	5.66263	99.3644	2.10062e-23	6.34173e-22
ENSMUSG00000074805	Il1bos	-1.96267	1.18722	23.7458	1.09934e-06	6.14146e-06
ENSMUSG00000112008	Gm47218	-1.95953	0.843716	17.0049	3.72843e-05	0.000155147
ENSMUSG00000107745	Gm43917	-1.95889	-0.166948	12.3005	0.000452846	0.00146425
ENSMUSG00000112226	Gm48786	-1.95668	-0.376455	9.72877	0.00181406	0.00502217
ENSMUSG00000036949	Slc39a12	-1.95449	3.74454	108.246	2.37445e-25	8.00121e-24
ENSMUSG00000030882	Dnhd1	-1.95105	2.25542	39.9608	2.59114e-10	2.426e-09
ENSMUSG00000107468	5730507A11Rik	-1.95028	0.818369	16.526	4.79887e-05	0.000193327
ENSMUSG00000103321	4933403L11Rik	-1.95	1.55936	25.7026	3.98285e-07	2.3815e-06
ENSMUSG00000113183	Gm47664	-1.94622	0.168913	12.5877	0.000388301	0.00127534
ENSMUSG00000105643	Gm42611	-1.94336	0.216046	10.3598	0.00128785	0.00371659
ENSMUSG00000104822	Gm42967	-1.94293	0.123125	7.53325	0.00605704	0.0145576
ENSMUSG00000021573	Tppp	-1.94065	6.03836	159.433	1.50484e-36	9.80663e-35
ENSMUSG00000101122	Gm17971	-1.93867	0.306047	16.3176	5.35633e-05	0.000213287
ENSMUSG00000059146	Ntrk3	-1.93658	-0.195147	6.10331	0.0134929	0.0292241
ENSMUSG00000048038	Ccdc187	-1.93458	-0.389329	5.72935	0.0166836	0.0350619
ENSMUSG00000021135	Slc10a1	-1.93206	-0.467762	9.4549	0.00210586	0.00571281
ENSMUSG00000101823	Gm29438	-1.92994	1.58564	16.4089	5.10441e-05	0.000204245
ENSMUSG00000030468	Siglecg	-1.92747	2.30031	32.1304	1.44161e-08	1.08088e-07
ENSMUSG00000050953	Gja1	-1.92692	2.62157	11.0992	0.000863655	0.00259781
ENSMUSG00000097159	Gm26517	-1.92448	0.133756	11.4707	0.000707034	0.0021731
ENSMUSG00000038963	Slco4a1	-1.92345	5.95472	130.61	3.01324e-30	1.37577e-28
ENSMUSG00000090665	Gad1-ps	-1.91603	1.76001	30.3501	3.6068e-08	2.55411e-07
ENSMUSG00000028654	Mycl	-1.91347	3.6985	41.7508	1.0368e-10	1.01707e-09
ENSMUSG00000025104	Hdgfl3	-1.91297	3.60835	48.2953	3.66639e-12	4.28073e-11
ENSMUSG00000108714	Gm21057	-1.90513	2.29367	10.4995	0.00119405	0.00347571
ENSMUSG00000115597	AC154239.3	-1.90201	0.0723841	10.0726	0.00150494	0.00426369
ENSMUSG00000085471	4933423P22Rik	-1.89972	0.721193	13.6719	0.000217686	0.000758773
ENSMUSG00000108348	Gm42372	-1.89604	-0.296294	7.2764	0.00698664	0.0164917
ENSMUSG00000070583	Fv1	-1.89305	1.53844	23.9222	1.00307e-06	5.62275e-06
ENSMUSG00000086484	Nron	-1.88904	0.297027	9.31174	0.0022769	0.00612404
ENSMUSG00000106251	Gm42658	-1.88537	1.2953	13.4032	0.000251191	0.000863755
ENSMUSG00000104316	Gm37909	-1.88515	0.279501	10.1402	0.0014507	0.00412618
ENSMUSG00000075225	Ccdc162	-1.87785	3.18202	36.5744	1.46946e-09	1.24144e-08
ENSMUSG00000094132	Gm3264	-1.87484	2.66617	24.0506	9.38381e-07	5.28617e-06
ENSMUSG00000029093	Sorcs2	-1.87359	-0.0259006	8.34625	0.00386483	0.00980324
ENSMUSG00000097177	9330159M07Rik	-1.87053	1.44414	24.9663	5.83415e-07	3.40317e-06
ENSMUSG00000102324	Gm19721	-1.86999	1.93992	22.8889	1.71645e-06	9.31795e-06
ENSMUSG00000114094	Gm48375	-1.86729	-0.41018	5.86225	0.015469	0.0328453
ENSMUSG00000110458	Gm21769	-1.86669	-0.328161	8.6042	0.00335388	0.00864053
ENSMUSG00000021872	Rnase10	-1.86647	0.588766	18.1087	2.08646e-05	9.11549e-05
ENSMUSG00000106288	Gm43593	-1.86462	-0.167838	9.86209	0.0016872	0.0047163
ENSMUSG00000048905	4930539E08Rik	-1.86447	0.335128	12.1807	0.000482868	0.00154981
ENSMUSG00000029161	Cgref1	-1.86279	1.24653	17.6267	2.68785e-05	0.000115084
ENSMUSG00000102808	5430420F09Rik	-1.85809	-0.224048	5.74599	0.0165264	0.0347822
ENSMUSG00000109428	Gm45698	-1.85756	-0.139788	7.93088	0.00485982	0.0120179
ENSMUSG00000082922	Gm6939	-1.85478	0.168695	8.66444	0.0032448	0.00838848
ENSMUSG00000053693	Mast1	-1.85438	0.0823577	12.2498	0.000465303	0.00149994
ENSMUSG00000093772	4931403E22Rik	-1.85235	0.851599	9.60002	0.00194575	0.00533224
ENSMUSG00000103834	Gm37613	-1.85125	-0.110468	6.05579	0.0138608	0.029894
ENSMUSG00000114864	Gm41071	-1.84819	2.80514	30.8106	2.84476e-08	2.04483e-07
ENSMUSG00000093346	Gm26115	-1.84788	1.77312	19.7021	9.05008e-06	4.27452e-05
ENSMUSG00000038732	Mboat1	-1.84746	3.2507	49.6109	1.8747e-12	2.28815e-11
ENSMUSG00000041380	Htr2c	-1.84688	2.25573	20.331	6.51381e-06	3.16345e-05
ENSMUSG00000042826	Fgf11	-1.84563	4.11615	108.896	1.7105e-25	5.84376e-24
ENSMUSG00000114438	Gm47827	-1.84548	0.814862	12.2278	0.000470828	0.00151511
ENSMUSG00000102742	Pcdhga11	-1.84192	-0.27277	6.85501	0.00883931	0.0202133
ENSMUSG00000050965	Prkca	-1.84145	5.49216	138.891	4.65279e-32	2.29429e-30
ENSMUSG00000034463	Scara3	-1.83821	-0.141842	6.80377	0.00909654	0.0207438
ENSMUSG00000084806	Gm15232	-1.8334	0.911269	19.417	1.05069e-05	4.86931e-05
ENSMUSG00000114612	Gm47550	-1.83313	1.15155	16.2756	5.47647e-05	0.000217603
ENSMUSG00000104235	Gm37589	-1.83097	0.254364	7.76911	0.00531473	0.0129973
ENSMUSG00000114253	Gm47798	-1.82791	2.11236	22.918	1.69066e-06	9.18483e-06
ENSMUSG00000097429	Gm26520	-1.82056	1.8484	28.7638	8.17635e-08	5.4705e-07
ENSMUSG00000102674	8030442B05Rik	-1.81951	2.78664	45.5145	1.51513e-11	1.6529e-10
ENSMUSG00000079484	Phyhd1	-1.81825	5.9144	156.951	5.24536e-36	3.31601e-34
ENSMUSG00000017740	Slc12a5	-1.8182	1.09848	20.5872	5.69767e-06	2.80205e-05
ENSMUSG00000074629	4930518I15Rik	-1.81797	1.09877	16.1562	5.8326e-05	0.000230146
ENSMUSG00000022353	Mtss1	-1.81708	5.71658	188.55	6.58786e-43	6.54056e-41
ENSMUSG00000042371	Slc5a10	-1.81521	2.17191	33.521	7.04993e-09	5.52967e-08
ENSMUSG00000083849	Gm13477	-1.81496	-0.348325	6.97907	0.00824685	0.0190291
ENSMUSG00000108486	Gm44836	-1.81213	1.05087	17.7653	2.49895e-05	0.000107587
ENSMUSG00000049493	Pls1	-1.81204	-0.273949	7.71955	0.00546261	0.0133062
ENSMUSG00000087179	Gm14230	-1.81181	-0.10353	9.09509	0.00256296	0.00680803
ENSMUSG00000035778	Ggta1	-1.81164	6.65134	237.401	1.45025e-53	2.18914e-51
ENSMUSG00000025020	Slit1	-1.81162	0.150239	7.74318	0.00539158	0.0131635
ENSMUSG00000009551	6330409D20Rik	-1.8115	0.78027	15.8017	7.03377e-05	0.00027317
ENSMUSG00000085118	Gm15774	-1.81082	2.27624	18.9334	1.35359e-05	6.15925e-05
ENSMUSG00000102719	Gm37760	-1.81049	1.49764	27.392	1.66121e-07	1.05741e-06
ENSMUSG00000030539	Sema4b	-1.80314	5.46611	105.023	1.20709e-24	3.93313e-23
ENSMUSG00000108709	4933431G14Rik	-1.80071	1.3884	15.4428	8.50391e-05	0.000323889
ENSMUSG00000107937	Gm44200	-1.80029	1.47622	11.4218	0.000725853	0.00222448
ENSMUSG00000101210	Gm28720	-1.79988	0.962992	14.0477	0.000178233	0.000633188
ENSMUSG00000022206	Npr3	-1.79807	0.298379	9.31752	0.00226973	0.00610698
ENSMUSG00000113898	Gm19144	-1.79781	0.815044	7.74874	0.005375	0.0131339
ENSMUSG00000057836	Xlr3a	-1.79747	0.219415	6.11138	0.0134314	0.0291126
ENSMUSG00000020264	Slc36a2	-1.79737	2.25562	41.8646	9.782e-11	9.62775e-10
ENSMUSG00000103901	Gm37499	-1.79653	0.731137	13.5721	0.000229579	0.000796846
ENSMUSG00000112360	Gm48614	-1.79463	1.39111	22.147	2.52552e-06	1.32108e-05
ENSMUSG00000115624	AC154640.4	-1.79423	3.22521	41.4077	1.23569e-10	1.20181e-09
ENSMUSG00000094410	Gm38394	-1.79299	2.7789	16.2082	5.67467e-05	0.000224513
ENSMUSG00000081451	Gm12734	-1.79014	-0.314132	7.89595	0.00495457	0.0122175
ENSMUSG00000051236	Msrb3	-1.78738	0.247092	10.2705	0.00135173	0.00387448
ENSMUSG00000059401	Mamld1	-1.78051	2.38181	42.102	8.66328e-11	8.58378e-10
ENSMUSG00000112875	Gm48074	-1.77941	0.520663	6.06843	0.0137619	0.0297201
ENSMUSG00000100502	Gm28286	-1.77935	3.36676	52.6784	3.92898e-13	5.05403e-12
ENSMUSG00000028487	Bnc2	-1.77846	-0.2446	6.2482	0.0124319	0.027201
ENSMUSG00000090707	Gm8237	-1.77661	-0.362457	9.71084	0.00183185	0.00506325
ENSMUSG00000108736	Gm45151	-1.7761	-0.303255	6.46051	0.0110298	0.0244872
ENSMUSG00000102415	A430110C17Rik	-1.77392	0.0371497	9.00389	0.00269406	0.0071141
ENSMUSG00000105632	Gm43272	-1.77148	3.70007	59.2358	1.39866e-14	2.09206e-13
ENSMUSG00000058248	Kcnh1	-1.7706	-0.029079	6.00138	0.0142947	0.0307159
ENSMUSG00000114524	Gm48357	-1.77044	-0.147692	5.30082	0.0213154	0.043325
ENSMUSG00000106535	Gm43031	-1.76957	-0.0404477	8.54142	0.00347155	0.00890492
ENSMUSG00000078866	Zfp970	-1.76778	3.12965	44.3548	2.7394e-11	2.88221e-10
ENSMUSG00000020787	P2rx1	-1.76693	3.10396	26.1316	3.18928e-07	1.93595e-06
ENSMUSG00000111264	E030022I16Rik	-1.76655	1.67162	24.3727	7.9385e-07	4.52715e-06
ENSMUSG00000078202	Nrarp	-1.76611	1.13624	13.3326	0.000260825	0.000891904
ENSMUSG00000047414	Flrt2	-1.76422	0.200214	12.0144	0.000527917	0.00167493
ENSMUSG00000064177	Ghrl	-1.76201	0.188257	6.17483	0.0129581	0.028231
ENSMUSG00000060212	Pcnx2	-1.75946	3.99607	59.5063	1.21906e-14	1.83641e-13
ENSMUSG00000092341	Malat1	-1.75936	9.51028	39.5544	3.19041e-10	2.95342e-09
ENSMUSG00000086916	Gm15903	-1.75691	-0.281037	5.83622	0.0156995	0.0332773
ENSMUSG00000021356	Irf4	-1.75448	3.28625	67.7147	1.88953e-16	3.41708e-15
ENSMUSG00000112640	Gm32687	-1.75054	1.03851	15.0722	0.000103479	0.000387241
ENSMUSG00000040253	Gbp7	-1.74937	4.99959	146.841	8.50103e-34	4.70995e-32
ENSMUSG00000042359	Osbpl6	-1.74932	1.10037	13.1699	0.000284483	0.000964113
ENSMUSG00000103388	Gm37581	-1.74875	0.244046	7.93088	0.00485981	0.0120179
ENSMUSG00000082936	Gm16166	-1.74798	-0.0646407	9.01731	0.00267434	0.00706836
ENSMUSG00000103821	D430013B06Rik	-1.74623	0.29015	5.42338	0.0198688	0.0407938
ENSMUSG00000097997	Gm27017	-1.74581	-0.30579	8.55116	0.00345302	0.00886353
ENSMUSG00000027075	Slc43a1	-1.74438	1.37518	14.2726	0.000158148	0.000569215
ENSMUSG00000114827	Gm46432	-1.74398	-0.143068	5.97117	0.0145416	0.0311624
ENSMUSG00000085852	Gm13807	-1.74119	0.378593	10.2815	0.00134371	0.00385821
ENSMUSG00000054385	Ceacam2	-1.73767	0.452612	6.97469	0.00826707	0.0190728
ENSMUSG00000102302	Gm38190	-1.73604	2.84362	19.7731	8.72011e-06	4.13451e-05
ENSMUSG00000098889	Gm27206	-1.7353	0.583895	11.2385	0.000801162	0.00243159
ENSMUSG00000111792	Gm33858	-1.73487	4.64021	21.383	3.76096e-06	1.90926e-05
ENSMUSG00000057914	Cacnb2	-1.73261	3.32644	71.1995	3.22865e-17	6.21893e-16
ENSMUSG00000027217	Tspan18	-1.73208	4.67313	60.0362	9.31294e-15	1.42027e-13
ENSMUSG00000097379	Gm26873	-1.73173	1.71063	13.5261	0.000235265	0.000813415
ENSMUSG00000037490	Slc2a12	-1.72926	1.28567	15.579	7.91271e-05	0.000303718
ENSMUSG00000082154	Gm16464	-1.72769	0.494102	13.6685	0.000218077	0.000759956
ENSMUSG00000093739	Gm20692	-1.7273	0.154739	6.05314	0.0138816	0.0299345
ENSMUSG00000107362	Gm40309	-1.72565	-0.0896212	6.14096	0.0132086	0.0287049
ENSMUSG00000108681	Gm17825	-1.72548	0.482774	10.3653	0.00128407	0.00370784
ENSMUSG00000109005	Gm45221	-1.7251	1.88661	17.1097	3.5282e-05	0.000147771
ENSMUSG00000086288	Gm15265	-1.72142	1.00769	19.356	1.08476e-05	5.01464e-05
ENSMUSG00000097860	Gm26857	-1.7197	2.05672	16.8449	4.05616e-05	0.000167049
ENSMUSG00000112643	Gm19688	-1.719	-0.163645	7.21875	0.00721457	0.0169567
ENSMUSG00000083962	Gm15707	-1.71893	0.079906	9.34403	0.00223713	0.00603244
ENSMUSG00000097901	Gm26680	-1.71876	1.74148	18.1013	2.09456e-05	9.14277e-05
ENSMUSG00000114344	Gm17941	-1.71608	1.14191	21.5806	3.39273e-06	1.73414e-05
ENSMUSG00000097633	Gm16617	-1.71537	1.17622	17.399	3.02991e-05	0.000128502
ENSMUSG00000109984	Gm38948	-1.7151	0.039004	7.2119	0.00724218	0.0170053
ENSMUSG00000025993	Slc40a1	-1.71426	7.3969	170.228	6.59584e-39	4.87862e-37
ENSMUSG00000043822	Adamtsl5	-1.71398	0.464659	10.1879	0.00141363	0.00403391
ENSMUSG00000107668	Gm44424	-1.71043	-0.363399	7.53399	0.00605457	0.014554
ENSMUSG00000087319	Gm15907	-1.70961	-0.114788	6.47236	0.0109565	0.0243603
ENSMUSG00000081223	Gm12247	-1.70916	-0.106004	10.3894	0.00126743	0.00366623
ENSMUSG00000085767	Gm13563	-1.70881	2.27501	19.4742	1.01966e-05	4.74333e-05
ENSMUSG00000106870	Gm43681	-1.70715	3.76606	77.7463	1.1716e-18	2.54876e-17
ENSMUSG00000048442	Smim5	-1.70661	0.592595	8.45016	0.00365011	0.00930806
ENSMUSG00000081974	Gm11960	-1.7054	-0.0108505	9.95702	0.00160237	0.00450815
ENSMUSG00000103696	Gm37531	-1.70387	-0.258907	6.3438	0.0117792	0.0259532
ENSMUSG00000090069	E430024P14Rik	-1.70288	1.86362	31.3718	2.13048e-08	1.55635e-07
ENSMUSG00000052212	Cd177	-1.70189	1.91958	19.7912	8.63801e-06	4.09952e-05
ENSMUSG00000089636	1700058P15Rik	-1.70185	2.7348	39.0925	4.04201e-10	3.68641e-09
ENSMUSG00000102964	9430034N14Rik	-1.70148	1.15614	20.804	5.08767e-06	2.52896e-05
ENSMUSG00000089736	Tgfbr3l	-1.69833	0.570116	11.1219	0.000853159	0.00256833
ENSMUSG00000000794	Kcnn3	-1.69302	-0.58792	6.16098	0.0130599	0.0284235
ENSMUSG00000040694	Apobec2	-1.69266	0.937673	13.3192	0.000262703	0.000897083
ENSMUSG00000027200	Sema6d	-1.68949	4.06881	71.5071	2.76257e-17	5.36308e-16
ENSMUSG00000043467	Zbtb37	-1.68949	5.50082	44.5891	2.4304e-11	2.57912e-10
ENSMUSG00000028017	Egf	-1.68926	0.857769	11.3249	0.000764756	0.00233499
ENSMUSG00000087478	4930506C21Rik	-1.68896	2.0129	22.932	1.67833e-06	9.12777e-06
ENSMUSG00000108447	Gm44567	-1.68667	0.381937	10.698	0.0010725	0.00315042
ENSMUSG00000097380	Gm26816	-1.68655	0.22964	6.79227	0.00915536	0.0208522
ENSMUSG00000067389	Gm17080	-1.68649	0.804085	11.1722	0.000830311	0.0025072
ENSMUSG00000107560	Gm44199	-1.68427	2.27208	17.5131	2.8533e-05	0.000121604
ENSMUSG00000111063	Zkscan7	-1.68281	1.88394	24.2432	8.49054e-07	4.82152e-06
ENSMUSG00000085912	Trp53cor1	-1.67778	1.42342	15.2999	9.17222e-05	0.000346753
ENSMUSG00000109539	Gm44667	-1.6762	4.39774	31.2973	2.2139e-08	1.61172e-07
ENSMUSG00000081512	Gm15821	-1.67528	0.751658	14.4039	0.000147495	0.000534383
ENSMUSG00000038473	Nos1ap	-1.67281	2.96789	32.6597	1.0979e-08	8.37611e-08
ENSMUSG00000052407	Ccdc171	-1.6722	1.95624	28.4485	9.62251e-08	6.3604e-07
ENSMUSG00000108268	Gm44187	-1.67194	-0.172621	7.80982	0.0051963	0.0127372
ENSMUSG00000107962	Gm43980	-1.67126	3.86008	23.6509	1.15492e-06	6.41798e-06
ENSMUSG00000106904	Gm43029	-1.66993	0.546555	8.90541	0.00284328	0.00746284
ENSMUSG00000025735	Rhbdl1	-1.66573	0.439988	9.66727	0.0018758	0.00516929
ENSMUSG00000038677	Scube3	-1.66526	0.411323	9.00427	0.0026935	0.0071139
ENSMUSG00000059873	Olfr1029	-1.66259	1.3177	14.8517	0.000116302	0.000431299
ENSMUSG00000075027	4631405J19Rik	-1.6616	-0.43472	6.47102	0.0109648	0.0243729
ENSMUSG00000047220	Ccdc36	-1.66022	1.88945	32.2465	1.35804e-08	1.02184e-07
ENSMUSG00000074519	Zfp971	-1.65727	2.15519	29.4805	5.64821e-08	3.88262e-07
ENSMUSG00000110580	D830024N08Rik	-1.65692	0.396942	8.83476	0.00295547	0.00772716
ENSMUSG00000020044	Timp3	-1.65518	2.13219	11.7347	0.000613465	0.00191536
ENSMUSG00000023150	Ivns1abp	-1.65258	10.7192	103.418	2.71355e-24	8.72643e-23
ENSMUSG00000031910	Has3	-1.6517	0.868899	13.1537	0.00028696	0.000970951
ENSMUSG00000024354	Slc23a1	-1.65133	0.522047	10.926	0.000948264	0.0028219
ENSMUSG00000100629	Gm28192	-1.65064	2.41503	28.8993	7.62404e-08	5.13114e-07
ENSMUSG00000091756	Gm3095	-1.64789	0.827706	10.9174	0.000952662	0.00283328
ENSMUSG00000109799	Gm45515	-1.64518	1.92135	15.022	0.000106265	0.000396664
ENSMUSG00000102976	Zc3h11a	-1.64444	4.26222	55.8307	7.89901e-14	1.09925e-12
ENSMUSG00000030589	Rasgrp4	-1.6372	3.89587	63.1589	1.90683e-15	3.11001e-14
ENSMUSG00000068959	Zfp619	-1.637	3.59356	73.1383	1.20873e-17	2.41959e-16
ENSMUSG00000107505	Gm18009	-1.63637	0.567544	7.62157	0.00576742	0.0139476
ENSMUSG00000097077	Gm16712	-1.63442	2.26823	38.9395	4.37139e-10	3.97455e-09
ENSMUSG00000082776	Gm7061	-1.63111	0.652831	15.1505	9.92731e-05	0.000373012
ENSMUSG00000091370	5730435O14Rik	-1.62985	0.115174	10.9489	0.000936598	0.00279393
ENSMUSG00000000792	Slc5a5	-1.62752	1.32284	18.6571	1.56461e-05	7.01799e-05
ENSMUSG00000020734	Grin2c	-1.62727	1.26249	8.4931	0.00356496	0.00912237
ENSMUSG00000103043	Gm37306	-1.62559	0.11798	7.12216	0.00761368	0.0177397
ENSMUSG00000106087	Gm43609	-1.6254	1.02566	8.69665	0.00318795	0.00827213
ENSMUSG00000024168	Tmem204	-1.625	4.98272	96.1158	1.08355e-22	3.13065e-21
ENSMUSG00000027939	Nup210l	-1.62453	1.90426	17.5421	2.81014e-05	0.000119903
ENSMUSG00000047419	Cmya5	-1.62235	3.25984	54.9976	1.20675e-13	1.64076e-12
ENSMUSG00000085914	Gm14320	-1.62191	-0.178801	7.16148	0.00744859	0.0174181
ENSMUSG00000052724	Gm9888	-1.62142	2.0464	20.8478	4.97277e-06	2.47684e-05
ENSMUSG00000027840	Wnt2b	-1.62131	0.581612	8.75313	0.00309072	0.0080438
ENSMUSG00000109781	Gm45509	-1.61824	0.12608	5.70332	0.0169328	0.035523
ENSMUSG00000086942	Gm15489	-1.61713	0.475349	7.31036	0.00685582	0.0162399
ENSMUSG00000031980	Agt	-1.61425	1.85807	7.91917	0.00489138	0.0120879
ENSMUSG00000109132	Gm44545	-1.61307	0.127228	6.67966	0.00975193	0.0220379
ENSMUSG00000112545	1300014J16Rik	-1.61146	-0.120668	8.57784	0.00340279	0.00875738
ENSMUSG00000089875	Etohd2	-1.61145	3.42115	50.5397	1.16776e-12	1.45777e-11
ENSMUSG00000051043	Gprc5c	-1.61027	0.807313	15.1139	0.000101217	0.000379738
ENSMUSG00000082855	Gm14537	-1.60923	-0.0448607	9.93014	0.00162594	0.00456405
ENSMUSG00000110598	Gm45854	-1.6085	0.842662	12.6349	0.000378621	0.00124715
ENSMUSG00000085732	Gm4279	-1.60791	0.155796	6.49154	0.0108389	0.0241658
ENSMUSG00000072720	Myo18b	-1.60762	6.0096	124.215	7.55755e-29	3.19425e-27
ENSMUSG00000043592	Unc5cl	-1.60631	0.645899	10.0756	0.00150244	0.00425786
ENSMUSG00000104503	Gm37738	-1.60625	-0.552269	5.67574	0.0172011	0.0359858
ENSMUSG00000091534	Gm17195	-1.60587	-0.0556855	7.42696	0.00642537	0.0153481
ENSMUSG00000102496	Gm36989	-1.60432	1.34359	11.0394	0.000891956	0.00267316
ENSMUSG00000031494	Cd209a	-1.60418	3.89787	42.4684	7.1834e-11	7.18e-10
ENSMUSG00000058812	0610039K10Rik	-1.60296	1.54262	15.1553	9.90196e-05	0.000372248
ENSMUSG00000106099	Gm42664	-1.6017	2.24234	25.545	4.32173e-07	2.57166e-06
ENSMUSG00000038623	Tm6sf1	-1.6013	6.1469	76.2421	2.50933e-18	5.34878e-17
ENSMUSG00000028195	Cyr61	-1.60055	1.48734	14.1217	0.00017136	0.000611416
ENSMUSG00000104891	2510017J16Rik	-1.60013	0.8587	12.2943	0.00045435	0.00146879
ENSMUSG00000103928	Gm37893	-1.59805	3.49976	39.3613	3.52208e-10	3.24422e-09
ENSMUSG00000003882	Il7r	-1.59668	4.25682	77.9313	1.06687e-18	2.33811e-17
ENSMUSG00000079076	Gm3086	-1.59451	-0.123729	9.72244	0.00182032	0.0050361
ENSMUSG00000102982	Gm38319	-1.59327	0.0969732	5.84468	0.0156242	0.0331368
ENSMUSG00000110148	5830408C22Rik	-1.59293	0.131189	7.97128	0.00475252	0.01179
ENSMUSG00000054178	Gm9938	-1.59267	1.58222	12.3627	0.000438009	0.001425
ENSMUSG00000029299	Abcg3	-1.59231	3.63996	60.3786	7.82609e-15	1.19846e-13
ENSMUSG00000084899	Gm15344	-1.5892	2.24366	13.366	0.000256226	0.000878209
ENSMUSG00000024379	Tslp	-1.58717	1.10535	15.7732	7.14069e-05	0.000276826
ENSMUSG00000001998	Ap4e1	-1.58398	4.16496	70.195	5.3723e-17	1.01627e-15
ENSMUSG00000110397	Gm45540	-1.583	3.67043	27.2486	1.78905e-07	1.13003e-06
ENSMUSG00000109238	Gm35060	-1.58275	1.01569	9.46502	0.00209427	0.00568868
ENSMUSG00000105970	Gm43360	-1.58176	0.0795344	9.76634	0.00177736	0.00493849
ENSMUSG00000095385	D630033O11Rik	-1.5803	0.141927	10.2207	0.00138876	0.00396908
ENSMUSG00000041245	Wnk3	-1.57991	0.716532	12.0688	0.000512729	0.00163571
ENSMUSG00000094258	Gm8159	-1.57927	-0.365787	5.2147	0.0223968	0.0452184
ENSMUSG00000113216	Gm40841	-1.57854	4.59589	93.4752	4.11319e-22	1.15021e-20
ENSMUSG00000113238	Gm47251	-1.57717	-0.13982	5.08052	0.0241961	0.0484348
ENSMUSG00000093722	Gm20612	-1.57635	2.16368	17.0847	3.57486e-05	0.000149345
ENSMUSG00000053925	Gm9929	-1.57621	2.63758	31.3392	2.16665e-08	1.58044e-07
ENSMUSG00000085881	Gm15912	-1.57396	1.58704	23.1089	1.5308e-06	8.39332e-06
ENSMUSG00000086008	Gm8817	-1.57302	0.291778	7.42531	0.00643128	0.015359
ENSMUSG00000114150	Gm46367	-1.57095	0.877849	11.5432	0.000679972	0.0021004
ENSMUSG00000104245	Gm38155	-1.57025	1.45784	15.9723	6.42753e-05	0.000251826
ENSMUSG00000022240	Ctnnd2	-1.5698	3.00931	31.318	2.19034e-08	1.59571e-07
ENSMUSG00000050747	Trim15	-1.56964	0.0440944	5.68898	0.0170717	0.0357606
ENSMUSG00000013562	4833413E03Rik	-1.5687	-0.155385	8.9285	0.00280755	0.00737955
ENSMUSG00000107756	Gm44164	-1.56849	1.53529	7.44221	0.00637116	0.0152407
ENSMUSG00000046108	Il17c	-1.56848	0.298232	9.64435	0.00189935	0.00522251
ENSMUSG00000040732	Erg	-1.56515	0.202473	7.48634	0.00621689	0.0149103
ENSMUSG00000036304	Zdhhc23	-1.56271	0.0673623	7.3219	0.00681192	0.0161437
ENSMUSG00000107320	Gm42549	-1.56027	0.450649	7.25514	0.00706985	0.0166588
ENSMUSG00000087721	Gm26280	-1.55842	0.552508	6.87645	0.00873389	0.0200063
ENSMUSG00000034248	Slc25a37	-1.55818	7.42197	123.172	1.27882e-28	5.29904e-27
ENSMUSG00000086331	Gm16310	-1.55781	-0.139279	7.00968	0.008107	0.0187415
ENSMUSG00000101845	Gm28198	-1.55494	-0.365385	6.13209	0.013275	0.0288281
ENSMUSG00000081137	BC022960	-1.55447	1.47006	17.9585	2.25775e-05	9.78866e-05
ENSMUSG00000005043	Sgsh	-1.55221	4.33585	67.0822	2.60417e-16	4.64139e-15
ENSMUSG00000077714	Snord17	-1.55073	0.0827129	8.95561	0.00276619	0.00728378
ENSMUSG00000116927		-1.55039	0.608107	12.0546	0.000516646	0.00164502
ENSMUSG00000117079		-1.54901	2.63881	26.0729	3.28771e-07	1.98835e-06
ENSMUSG00000039908	Slc26a11	-1.54478	3.50992	36.8359	1.28503e-09	1.09628e-08
ENSMUSG00000060961	Slc4a4	-1.54358	1.95903	8.37515	0.00380386	0.00966182
ENSMUSG00000104548	Gm43857	-1.53983	1.5456	23.9984	9.64155e-07	5.41131e-06
ENSMUSG00000105572	Gm43300	-1.5392	2.07523	27.3642	1.68522e-07	1.07085e-06
ENSMUSG00000036769	Wdr44	-1.53801	5.42838	94.7949	2.11172e-22	5.99591e-21
ENSMUSG00000040522	Tlr8	-1.53751	1.46113	12.2481	0.000465736	0.00150101
ENSMUSG00000079481	Nhsl2	-1.53564	4.24134	47.368	5.88363e-12	6.70341e-11
ENSMUSG00000030307	Slc6a11	-1.53471	3.10656	7.41393	0.00647209	0.0154397
ENSMUSG00000108064	Gm44423	-1.53452	2.57705	30.8973	2.72054e-08	1.9603e-07
ENSMUSG00000030310	Slc6a1	-1.53425	2.85152	15.4024	8.68771e-05	0.00032987
ENSMUSG00000019320	Noxo1	-1.53405	1.79942	22.213	2.4401e-06	1.28229e-05
ENSMUSG00000112847	Gm47573	-1.53287	0.26221	11.3374	0.000759613	0.00232025
ENSMUSG00000092305	Prps1l1	-1.53191	1.36372	14.7903	0.000120154	0.000443474
ENSMUSG00000086953	Aknaos	-1.52802	0.0845301	5.30853	0.0212213	0.043187
ENSMUSG00000000157	Itgb2l	-1.52761	0.183939	6.74278	0.00941277	0.0213661
ENSMUSG00000084984	Far1os	-1.52506	1.16663	11.37	0.000746399	0.00228366
ENSMUSG00000056880	Gadl1	-1.52031	1.28363	14.4472	0.000144142	0.000523135
ENSMUSG00000097494	4933406C10Rik	-1.51833	-0.337741	7.05854	0.00788884	0.0182972
ENSMUSG00000051177	Plcb1	-1.51676	-0.162976	5.07316	0.024299	0.0485947
ENSMUSG00000109876	Gm45449	-1.5144	0.201871	9.6642	0.00187894	0.00517697
ENSMUSG00000005947	Itgae	-1.51363	2.71957	28.3171	1.02983e-07	6.77078e-07
ENSMUSG00000038831	Ralgps1	-1.5125	5.58344	137.246	1.06531e-31	5.18393e-30
ENSMUSG00000112922	Gm47572	-1.51233	1.65858	20.0512	7.53944e-06	3.61996e-05
ENSMUSG00000102018	K230010J24Rik	-1.50654	-0.220434	6.48049	0.0109065	0.0242835
ENSMUSG00000044788	Fads6	-1.50547	3.24495	44.7623	2.2247e-11	2.37617e-10
ENSMUSG00000016493	Cd46	-1.50543	1.98359	20.3474	6.45817e-06	3.14055e-05
ENSMUSG00000074357	AA386476	-1.50322	0.696071	13.211	0.000278313	0.000944717
ENSMUSG00000021575	Ahrr	-1.50124	1.15607	9.73071	0.00181215	0.00501911
ENSMUSG00000096991	Gm26789	-1.50028	1.14626	6.90362	0.00860214	0.019732
ENSMUSG00000116518	AC138177.5	-1.49961	-0.474166	5.39862	0.0201527	0.0412908
ENSMUSG00000038094	Atp13a4	-1.49833	0.597339	6.21561	0.0126629	0.0276613
ENSMUSG00000020717	Pecam1	-1.49811	4.94335	63.1062	1.95853e-15	3.1873e-14
ENSMUSG00000087368	BC065397	-1.49723	0.872748	8.01616	0.00463617	0.0115304
ENSMUSG00000029361	Nos1	-1.49428	0.309669	6.33509	0.0118372	0.0260499
ENSMUSG00000102752	Gm7694	-1.49427	4.85295	103.289	2.89714e-24	9.25646e-23
ENSMUSG00000085188	Gm11368	-1.49413	0.73521	11.2129	0.000812314	0.00246241
ENSMUSG00000106319	Gm42601	-1.49089	0.0469707	7.71857	0.00546556	0.0133112
ENSMUSG00000108543	Gm44735	-1.49059	-0.0151351	5.93274	0.0148621	0.0317205
ENSMUSG00000086600	C030005K06Rik	-1.49008	-0.154376	5.70598	0.0169072	0.0354763
ENSMUSG00000043496	Tril	-1.4897	1.35484	7.72337	0.00545106	0.0132824
ENSMUSG00000032528	Vipr1	-1.48895	4.13036	70.1563	5.47875e-17	1.03508e-15
ENSMUSG00000074272	Ceacam1	-1.4881	5.07889	50.0222	1.52016e-12	1.86931e-11
ENSMUSG00000098183	Gm27010	-1.48677	3.42234	45.6397	1.42133e-11	1.55287e-10
ENSMUSG00000082630	Gm14834	-1.48569	-0.266232	5.25989	0.0218224	0.0442277
ENSMUSG00000109584	Gm7997	-1.48526	0.678692	6.4951	0.0108172	0.024132
ENSMUSG00000085408	C530005A16Rik	-1.48469	1.02819	13.8888	0.000193948	0.000682139
ENSMUSG00000026589	Sec16b	-1.48412	3.14813	36.5826	1.46336e-09	1.23912e-08
ENSMUSG00000115100	AC131586.2	-1.48344	0.0551886	6.81681	0.00903038	0.0206184
ENSMUSG00000030393	Zik1	-1.48273	2.16425	25.3217	4.85227e-07	2.86889e-06
ENSMUSG00000040840	4930579G18Rik	-1.48027	3.14498	10.9591	0.000931451	0.00278026
ENSMUSG00000035773	Kiss1r	-1.47934	0.9749	11.1438	0.000843117	0.00254224
ENSMUSG00000078125	Gm10916	-1.47697	-0.227462	5.3546	0.0206677	0.042159
ENSMUSG00000063558	Aox1	-1.47586	0.19786	6.7758	0.0092402	0.0210196
ENSMUSG00000067928	Zfp760	-1.47574	4.3729	75.1595	4.34189e-18	9.07198e-17
ENSMUSG00000024912	Fosl1	-1.47542	0.206662	5.49887	0.0190287	0.0393145
ENSMUSG00000106933	Gm43621	-1.47492	3.4716	19.3149	1.10835e-05	5.11187e-05
ENSMUSG00000074909	Ranbp6	-1.47485	4.691	86.4012	1.46899e-20	3.70199e-19
ENSMUSG00000015766	Eps8	-1.47241	2.83971	28.275	1.05246e-07	6.90422e-07
ENSMUSG00000051124	Gimap9	-1.47232	2.99843	30.3229	3.65774e-08	2.58771e-07
ENSMUSG00000056608	Chd9	-1.46996	7.37194	135.056	3.20979e-31	1.52187e-29
ENSMUSG00000116249	AC117831.2	-1.46946	1.4475	16.0092	6.30363e-05	0.000247346
ENSMUSG00000038292	Ccdc155	-1.4686	0.197005	6.38204	0.011528	0.0254872
ENSMUSG00000109279	Gm45220	-1.46825	3.71925	21.2071	4.12238e-06	2.07494e-05
ENSMUSG00000085274	BC046401	-1.46566	-0.244159	6.15805	0.0130816	0.0284623
ENSMUSG00000113894	Gm48838	-1.46542	2.13728	9.15357	0.00248233	0.00662756
ENSMUSG00000097295	Hmgb1-ps8	-1.46395	1.81779	11.0883	0.00086874	0.00261045
ENSMUSG00000022580	Rhpn1	-1.46322	-0.142734	5.49682	0.0190511	0.0393497
ENSMUSG00000102850	Gm37082	-1.46264	0.924413	6.81198	0.00905485	0.0206679
ENSMUSG00000046085	4931422A03Rik	-1.4625	1.82498	13.3487	0.000258604	0.000885538
ENSMUSG00000112744	Gm48880	-1.46178	-0.216794	5.761	0.0163858	0.0345489
ENSMUSG00000097828	6430562O15Rik	-1.46129	0.165273	7.89908	0.00494599	0.0122025
ENSMUSG00000103144	Pcdhga1	-1.46029	2.67429	34.659	3.92816e-09	3.1564e-08
ENSMUSG00000025019	Lcor	-1.45986	3.71518	31.2602	2.25662e-08	1.6396e-07
ENSMUSG00000101778	Gm29488	-1.45966	0.461195	5.68859	0.0170755	0.0357606
ENSMUSG00000106543	Gm43378	-1.45886	1.50093	13.5384	0.000233735	0.000808994
ENSMUSG00000107608	Gm43863	-1.4577	0.902872	10.2918	0.00133627	0.00383833
ENSMUSG00000103983	Gm20045	-1.45745	3.09476	24.4129	7.77451e-07	4.44391e-06
ENSMUSG00000037224	Zfyve28	-1.45594	3.28236	40.5809	1.88644e-10	1.78885e-09
ENSMUSG00000079227	Ccr5	-1.4558	8.86772	134.372	4.52916e-31	2.11554e-29
ENSMUSG00000032915	Adgre4	-1.45351	1.78893	13.6756	0.000217255	0.000757448
ENSMUSG00000030029	Lrig1	-1.45291	1.03274	8.38711	0.0037789	0.00960504
ENSMUSG00000055235	Wdr86	-1.45262	0.568514	7.38692	0.00657	0.0156304
ENSMUSG00000073590	3222401L13Rik	-1.45172	4.26885	78.891	6.5632e-19	1.46883e-17
ENSMUSG00000101223	4930568A12Rik	-1.45048	1.14494	16.3368	5.30251e-05	0.000211258
ENSMUSG00000097457	2310031A07Rik	-1.44966	0.177567	7.09856	0.00771458	0.017938
ENSMUSG00000050954	Zfp169	-1.44892	3.56063	38.2549	6.20814e-10	5.55915e-09
ENSMUSG00000106262	Gm43375	-1.4489	0.276642	5.9811	0.01446	0.0310099
ENSMUSG00000054459	Vsnl1	-1.44655	-0.1275	5.45765	0.0194829	0.0401128
ENSMUSG00000105395	Gm42672	-1.44629	0.168352	8.10427	0.00441611	0.0110463
ENSMUSG00000031790	Mmp15	-1.4458	2.14161	18.158	2.03311e-05	8.9008e-05
ENSMUSG00000109593	Gm45431	-1.44138	0.0055896	5.70006	0.0169643	0.035571
ENSMUSG00000031517	Gpm6a	-1.44087	2.80215	13.627	0.000222956	0.000774984
ENSMUSG00000004668	Abca13	-1.4407	0.979641	10.2712	0.0013512	0.00387421
ENSMUSG00000082828	Gm16106	-1.43857	1.69606	16.3771	5.19077e-05	0.000207196
ENSMUSG00000022489	Pde1b	-1.43785	6.84516	102.035	5.45404e-24	1.70908e-22
ENSMUSG00000033721	Vav3	-1.4374	0.449381	7.21937	0.00721209	0.0169535
ENSMUSG00000091119	Ccdc152	-1.43653	1.1647	11.9344	0.00055108	0.0017434
ENSMUSG00000090031	4732440D04Rik	-1.43581	2.42811	34.8608	3.54147e-09	2.85654e-08
ENSMUSG00000015093	Clic3	-1.43504	0.950547	10.7928	0.00101898	0.00300873
ENSMUSG00000104698	Gm42602	-1.43104	0.323689	10.5489	0.00116255	0.00339271
ENSMUSG00000024978	Gpam	-1.4301	3.97584	38.7976	4.70116e-10	4.25347e-09
ENSMUSG00000025887	Casp12	-1.42948	1.64011	22.0814	2.61333e-06	1.36267e-05
ENSMUSG00000030865	Chp2	-1.42903	1.41673	13.3967	0.000252066	0.000866361
ENSMUSG00000079386	Gm3173	-1.42768	2.0478	11.0099	0.000906242	0.00271213
ENSMUSG00000085684	4930469K13Rik	-1.4273	1.83415	10.8672	0.00097883	0.00290468
ENSMUSG00000097197	9530027J09Rik	-1.42602	-0.266771	5.42918	0.019803	0.0406981
ENSMUSG00000086507	Adap2os	-1.42529	4.59667	16.6873	4.40754e-05	0.000179765
ENSMUSG00000048490	Nrip1	-1.42352	7.19531	95.3083	1.62931e-22	4.68006e-21
ENSMUSG00000102854	C130023A14Rik	-1.42308	0.135962	9.30355	0.00228711	0.00614769
ENSMUSG00000086742	Gm16201	-1.42261	0.0201034	6.27069	0.0122751	0.0269016
ENSMUSG00000097158	Gm26516	-1.42092	0.360066	5.36505	0.0205442	0.0419534
ENSMUSG00000096975	Gm16386	-1.42066	-0.308926	6.88062	0.00871352	0.0199689
ENSMUSG00000086944	Gm15859	-1.42034	-0.383884	6.08279	0.0136505	0.0295092
ENSMUSG00000108738	Gm44777	-1.4199	1.02878	10.8592	0.000983052	0.00291545
ENSMUSG00000080530	Gm25540	-1.41856	1.00524	13.4124	0.000249971	0.000860278
ENSMUSG00000016918	Sulf1	-1.41786	2.36377	9.99116	0.00157293	0.00443292
ENSMUSG00000105198	Gm42502	-1.4177	0.536088	9.94108	0.00161631	0.00454046
ENSMUSG00000029088	Kcnip4	-1.41683	0.316497	7.43621	0.00639245	0.0152842
ENSMUSG00000040055	Gjb6	-1.41653	1.17424	6.4974	0.0108033	0.0241117
ENSMUSG00000054252	Fgfr3	-1.41605	2.41221	9.39105	0.00218047	0.00589575
ENSMUSG00000108655	Gm44949	-1.412	3.47725	22.4571	2.14887e-06	1.13977e-05
ENSMUSG00000102953	Gm37019	-1.412	0.771771	8.13858	0.00433332	0.0108686
ENSMUSG00000084960	B430010I23Rik	-1.41063	1.64661	14.0349	0.000179451	0.000636751
ENSMUSG00000087117	Gm11523	-1.41025	0.069578	7.56665	0.00594583	0.0143205
ENSMUSG00000026357	Rgs18	-1.40972	0.216067	6.12104	0.0133582	0.028979
ENSMUSG00000085376	Gm14508	-1.40725	2.26869	16.0598	6.13744e-05	0.000241145
ENSMUSG00000035954	Dock4	-1.4069	7.32373	57.8166	2.87733e-14	4.1894e-13
ENSMUSG00000047108	Dnajb7	-1.40622	0.27876	6.31516	0.011971	0.0263138
ENSMUSG00000015452	Ager	-1.4037	1.44006	16.5055	4.85096e-05	0.000195054
ENSMUSG00000026829	Gbgt1	-1.40359	5.20248	33.5424	6.9727e-09	5.4749e-08
ENSMUSG00000015653	Steap2	-1.4032	1.41194	5.76389	0.0163588	0.0345067
ENSMUSG00000110388	Gm30329	-1.40305	3.88278	39.0558	4.11865e-10	3.75168e-09
ENSMUSG00000012819	Cdh23	-1.40298	5.84527	89.8741	2.53808e-21	6.80179e-20
ENSMUSG00000104214	Gm36638	-1.40189	1.42612	17.6596	2.64173e-05	0.000113273
ENSMUSG00000072966	Gprasp2	-1.40065	4.82194	72.2484	1.89747e-17	3.72272e-16
ENSMUSG00000113184	AC125351.1	-1.40037	2.93427	15.306	9.1425e-05	0.000345984
ENSMUSG00000033717	Adra2a	-1.399	1.432	16.2629	5.51338e-05	0.000218893
ENSMUSG00000029769	Ccdc136	-1.39857	0.086941	5.96274	0.0146113	0.0312891
ENSMUSG00000055184	Fam72a	-1.39656	4.02597	66.1107	4.26287e-16	7.37552e-15
ENSMUSG00000022899	Slc15a2	-1.39513	5.21708	9.62617	0.00191825	0.00526663
ENSMUSG00000104018	4833412K13Rik	-1.3945	-0.0405106	5.08361	0.0241531	0.0483566
ENSMUSG00000029072	Tas1r3	-1.39368	0.214909	7.65976	0.00564661	0.0136957
ENSMUSG00000085929	Gm13421	-1.39348	-0.434152	5.66676	0.0172893	0.0361551
ENSMUSG00000075569	Rsph10b	-1.39205	1.10958	13.1859	0.000282059	0.000956338
ENSMUSG00000031389	Arhgap4	-1.39203	7.42803	48.2146	3.82037e-12	4.44998e-11
ENSMUSG00000086765	Gm11827	-1.39199	0.392684	6.58748	0.0102699	0.0230534
ENSMUSG00000037465	Klf10	-1.39098	2.73009	32.5038	1.1896e-08	9.03838e-08
ENSMUSG00000113856	Gm10790	-1.39062	7.03963	51.8016	6.14008e-13	7.80328e-12
ENSMUSG00000021848	Otx2	-1.39057	1.06665	8.98405	0.00272347	0.0071815
ENSMUSG00000103046	Gm37309	-1.39043	1.98191	11.8512	0.000576245	0.00181216
ENSMUSG00000116645		-1.38815	0.244513	7.26369	0.00703625	0.0165903
ENSMUSG00000035183	Slc24a5	-1.38631	0.297098	8.25445	0.00406521	0.0102675
ENSMUSG00000074733	Zfp950	-1.38582	5.97294	65.6166	5.47759e-16	9.35682e-15
ENSMUSG00000042333	Tnfrsf14	-1.38485	5.31455	22.1898	2.46979e-06	1.29513e-05
ENSMUSG00000109390	Gm45718	-1.38363	0.112509	5.67737	0.0171851	0.0359574
ENSMUSG00000103230	Gm17970	-1.38217	1.63419	7.15216	0.00748737	0.0174941
ENSMUSG00000022519	Srl	-1.3818	2.42305	16.2272	5.61829e-05	0.000222461
ENSMUSG00000109812	Gm45640	-1.37889	3.4576	16.0012	6.33011e-05	0.00024832
ENSMUSG00000097151	Gm26514	-1.37831	0.652104	6.90545	0.00859336	0.0197149
ENSMUSG00000021708	Rasgrf2	-1.37764	2.8502	29.4564	5.71897e-08	3.92761e-07
ENSMUSG00000009731	Kcnd1	-1.37517	6.1044	103.053	3.26253e-24	1.03568e-22
ENSMUSG00000031303	Map3k15	-1.37433	2.47339	20.4276	6.19299e-06	3.02396e-05
ENSMUSG00000104088	Gm38275	-1.37348	0.122162	5.4909	0.0191157	0.0394721
ENSMUSG00000086401	Gm15559	-1.3728	0.375224	9.75336	0.00178995	0.00496695
ENSMUSG00000026064	Ptp4a1	-1.37253	0.853974	13.0785	0.000298702	0.00100768
ENSMUSG00000043336	Filip1l	-1.37156	5.90902	68.6742	1.16153e-16	2.13573e-15
ENSMUSG00000076431	Sox4	-1.37131	4.7827	29.8698	4.62059e-08	3.23332e-07
ENSMUSG00000074794	Arrdc3	-1.37027	5.19582	77.2684	1.49237e-18	3.21818e-17
ENSMUSG00000086491	Gm13291	-1.36811	1.92898	7.35778	0.00667734	0.0158476
ENSMUSG00000101320	Gm28529	-1.36588	0.565979	12.3114	0.000450204	0.0014573
ENSMUSG00000102602	A930004J17Rik	-1.36428	2.84779	13.4679	0.000242677	0.000836423
ENSMUSG00000073145	Gm12000	-1.363	0.729027	5.53259	0.0186655	0.0386612
ENSMUSG00000062175	Tgif2	-1.36131	2.15467	9.52035	0.00203205	0.00554718
ENSMUSG00000083811	Gm13071	-1.35893	0.519775	8.85879	0.00291681	0.00763417
ENSMUSG00000040950	Mgl2	-1.35843	3.37547	38.5953	5.21432e-10	4.69766e-09
ENSMUSG00000026009	Icos	-1.35814	1.59664	14.5782	0.000134465	0.000491387
ENSMUSG00000057706	Mex3b	-1.35803	4.17634	67.7274	1.87734e-16	3.3992e-15
ENSMUSG00000103976	Gm37677	-1.35785	0.387083	6.21787	0.0126467	0.02763
ENSMUSG00000028080	Lrba	-1.35736	7.19804	139.598	3.25885e-32	1.61772e-30
ENSMUSG00000056476	Med12l	-1.35685	5.22748	33.5575	6.91898e-09	5.43561e-08
ENSMUSG00000037820	Tgm2	-1.35672	5.84449	65.3075	6.40763e-16	1.08577e-14
ENSMUSG00000020105	Lrig3	-1.35358	3.66635	51.6735	6.55399e-13	8.2866e-12
ENSMUSG00000087312	Gm13833	-1.35256	0.617387	5.58369	0.0181285	0.0376598
ENSMUSG00000026276	2024-09-02	-1.35194	2.33284	27.9217	1.26328e-07	8.182e-07
ENSMUSG00000112280	A830082N09Rik	-1.35164	0.510803	8.05773	0.004531	0.0113088
ENSMUSG00000113104	Gm47806	-1.35137	0.300717	6.48565	0.0108749	0.0242241
ENSMUSG00000111889	Gm48071	-1.34936	-0.200847	5.58211	0.0181449	0.0376832
ENSMUSG00000103973	BC055308	-1.34935	0.21972	9.37073	0.00220477	0.00595277
ENSMUSG00000045509	Gpr150	-1.34914	1.04937	12.0613	0.000514799	0.00164161
ENSMUSG00000030474	Siglece	-1.34776	5.92369	67.6123	1.99019e-16	3.57726e-15
ENSMUSG00000102151	Gm37472	-1.34573	1.1926	8.76379	0.00307269	0.00800535
ENSMUSG00000025959	Klf7	-1.34551	4.04644	31.6527	1.84356e-08	1.36087e-07
ENSMUSG00000115220	AC154760.1	-1.34489	1.20072	14.3117	0.000154897	0.000558604
ENSMUSG00000089670	Gm16581	-1.34488	-0.1218	5.19921	0.0225972	0.0455858
ENSMUSG00000044098	Rsbn1	-1.34356	4.69135	32.8891	9.75695e-09	7.48741e-08
ENSMUSG00000062098	Btbd3	-1.34247	4.55642	61.5652	4.28327e-15	6.74068e-14
ENSMUSG00000086502	B130055M24Rik	-1.34156	1.36817	13.4006	0.000251542	0.00086476
ENSMUSG00000054293	P2ry10b	-1.33954	4.04255	62.0256	3.39025e-15	5.38111e-14
ENSMUSG00000038607	Gng10	-1.33897	2.03771	11.4644	0.000709429	0.00217956
ENSMUSG00000102336	Gm37233	-1.33805	3.01445	18.6518	1.56896e-05	7.0311e-05
ENSMUSG00000112368	AC166323.1	-1.33761	0.0506202	5.77126	0.0162903	0.034377
ENSMUSG00000108563	Gm44686	-1.33502	2.08547	17.0656	3.61115e-05	0.000150651
ENSMUSG00000030165	Klrd1	-1.33488	1.53516	15.0695	0.000103625	0.000387593
ENSMUSG00000030148	Clec4a2	-1.3324	5.37728	80.0085	3.728e-19	8.51053e-18
ENSMUSG00000026904	Slc4a10	-1.32942	2.42263	12.2625	0.000462163	0.00149047
ENSMUSG00000053964	Lgals4	-1.32933	2.57763	33.4165	7.43898e-09	5.79793e-08
ENSMUSG00000106665	Gm43389	-1.32901	1.41756	8.93098	0.00280375	0.00737348
ENSMUSG00000111082	Gm30934	-1.32827	-0.337049	6.05893	0.0138362	0.0298539
ENSMUSG00000103076	Gm37902	-1.32758	0.565195	7.81949	0.00516859	0.0126861
ENSMUSG00000000202	Btbd17	-1.32718	0.902694	7.56951	0.00593638	0.0143024
ENSMUSG00000005237	Dnah2	-1.3268	1.44911	10.5905	0.00113668	0.00332312
ENSMUSG00000105677	Gm43328	-1.32485	2.83835	21.5377	3.46942e-06	1.76854e-05
ENSMUSG00000066800	Rnasel	-1.32307	5.40651	123.759	9.51012e-29	3.9741e-27
ENSMUSG00000107000	Gm43481	-1.32298	2.6781	24.8351	6.24482e-07	3.62273e-06
ENSMUSG00000111160	Gm48855	-1.32149	-0.0694253	5.42648	0.0198336	0.0407441
ENSMUSG00000102780	Gm38253	-1.32136	2.16068	18.214	1.97422e-05	8.66607e-05
ENSMUSG00000031523	Dlc1	-1.32122	3.45319	43.207	4.92433e-11	5.02731e-10
ENSMUSG00000042155	Klhl23	-1.31996	4.30618	78.5585	7.76645e-19	1.72248e-17
ENSMUSG00000110062	B430319F04Rik	-1.31703	-0.0112147	5.02153	0.025034	0.0498961
ENSMUSG00000038007	Acer2	-1.31681	1.61965	9.27588	0.00232191	0.00623716
ENSMUSG00000044066	Cep68	-1.31476	6.80514	75.5493	3.56398e-18	7.52096e-17
ENSMUSG00000085622	3110056K07Rik	-1.31417	3.82489	50.004	1.5343e-12	1.88512e-11
ENSMUSG00000103869	Gm37420	-1.31405	1.32773	8.68696	0.00320495	0.00830458
ENSMUSG00000073716	Gm13241	-1.3137	1.0126	8.71829	0.00315033	0.00818454
ENSMUSG00000074228	Gm10645	-1.31245	0.70452	5.7888	0.0161285	0.0340745
ENSMUSG00000096967	Gm26621	-1.31186	1.09158	11.2694	0.000787945	0.00239639
ENSMUSG00000041992	Rapgef5	-1.31181	7.1948	102.435	4.45857e-24	1.40331e-22
ENSMUSG00000025746	Il6	-1.30944	2.78704	23.3583	1.3446e-06	7.41638e-06
ENSMUSG00000045392	Olfr1033	-1.30816	1.76798	11.8737	0.000569327	0.00179231
ENSMUSG00000032595	Cdhr4	-1.30784	0.896272	9.87529	0.00167513	0.00468434
ENSMUSG00000102562	Gm37694	-1.30671	0.595113	8.60987	0.00334346	0.0086182
ENSMUSG00000073485	H3f3aos	-1.30621	0.370551	7.57858	0.0059066	0.0142423
ENSMUSG00000004105	Angptl2	-1.30548	1.0709	9.72925	0.00181358	0.00502216
ENSMUSG00000100627	A830008E24Rik	-1.30468	3.26332	32.7914	1.02596e-08	7.84751e-08
ENSMUSG00000022987	Zfp641	-1.30395	2.21034	18.3245	1.86296e-05	8.21423e-05
ENSMUSG00000031200	Mtcp1	-1.30249	3.47986	39.0968	4.03307e-10	3.68052e-09
ENSMUSG00000086247	Gm15787	-1.30197	1.33973	14.5626	0.000135577	0.00049472
ENSMUSG00000085095	Gm15635	-1.30191	5.67275	16.9387	3.86065e-05	0.000160026
ENSMUSG00000055480	Zfp458	-1.30141	2.07134	23.6245	1.17086e-06	6.49925e-06
ENSMUSG00000103332	Pcdhga2	-1.30129	2.13287	14.9829	0.00010849	0.000404253
ENSMUSG00000117297		-1.3012	2.5873	25.05	5.58614e-07	3.27011e-06
ENSMUSG00000044783	Hjurp	-1.3012	6.87739	87.1368	1.01268e-20	2.58733e-19
ENSMUSG00000043872	Zmym1	-1.30039	2.77612	12.8403	0.00033924	0.00112823
ENSMUSG00000045730	Adrb2	-1.2997	6.95543	92.6699	6.17856e-22	1.71481e-20
ENSMUSG00000027224	Duoxa1	-1.29847	1.88091	6.30882	0.0120139	0.0263996
ENSMUSG00000039115	Itga9	-1.29839	6.21563	56.3987	5.91684e-14	8.34393e-13
ENSMUSG00000087036	Gm11748	-1.29835	1.48018	5.71002	0.0168684	0.0353999
ENSMUSG00000105272	Gm43071	-1.29828	2.54552	11.5939	0.000661676	0.0020516
ENSMUSG00000054514	Atad3aos	-1.29791	0.176998	5.59305	0.0180318	0.0374905
ENSMUSG00000018459	Slc13a3	-1.29669	3.89003	54.4234	1.61628e-13	2.15792e-12
ENSMUSG00000064141	Zfp69	-1.29646	5.06827	75.351	3.94049e-18	8.25661e-17
ENSMUSG00000097358	Gm26773	-1.29585	1.47552	9.89203	0.00165997	0.00464545
ENSMUSG00000083111	Gm14421	-1.29223	0.057474	5.60639	0.0178951	0.0372639
ENSMUSG00000027457	Snph	-1.28746	4.05045	38.9374	4.37616e-10	3.97645e-09
ENSMUSG00000042408	Zmym6	-1.28724	5.53196	33.2578	8.07173e-09	6.27457e-08
ENSMUSG00000108120	9930120I10Rik	-1.28686	1.32526	12.5075	0.000405312	0.00132474
ENSMUSG00000004609	Cd33	-1.28682	9.74153	96.5935	8.51286e-23	2.47895e-21
ENSMUSG00000035202	Lars2	-1.28529	8.72626	5.3644	0.0205519	0.0419634
ENSMUSG00000091952	Gm17709	-1.28372	1.28449	10.0008	0.00156471	0.00441226
ENSMUSG00000039431	Mtmr7	-1.28206	1.36951	9.15794	0.00247641	0.00661615
ENSMUSG00000056592	Zfp658	-1.28119	6.22324	96.9211	7.21455e-23	2.11756e-21
ENSMUSG00000031433	Rbm41	-1.28081	3.23803	12.5032	0.000406258	0.00132725
ENSMUSG00000106383	E330034L11Rik	-1.27974	1.1452	8.98599	0.00272057	0.00717515
ENSMUSG00000085337	Gm15964	-1.27842	1.48979	12.3268	0.000446492	0.0014475
ENSMUSG00000115417	AC131586.4	-1.27822	0.829625	11.0736	0.000875671	0.00262914
ENSMUSG00000076258	Gm23935	-1.2778	10.2735	5.12935	0.0235245	0.0472438
ENSMUSG00000093445	Lrch4	-1.27642	3.2346	15.435	8.53939e-05	0.000325072
ENSMUSG00000108923	4933431C10Rik	-1.27628	1.14888	6.53916	0.0105525	0.0236219
ENSMUSG00000084964	Gm15503	-1.27489	3.3533	28.2739	1.05306e-07	6.90511e-07
ENSMUSG00000095868	Gm23136	-1.27482	-0.289131	5.21766	0.0223586	0.0451537
ENSMUSG00000049176	Frmpd4	-1.27452	0.434665	6.21337	0.0126789	0.0276921
ENSMUSG00000063659	Zbtb18	-1.27442	7.87717	86.9684	1.10271e-20	2.80281e-19
ENSMUSG00000078919	Dpm1	-1.27433	3.88841	29.6279	5.23448e-08	3.62095e-07
ENSMUSG00000036273	Lrrk2	-1.2743	1.17752	6.24874	0.0124282	0.0271967
ENSMUSG00000029368	Alb	-1.2726	0.368928	6.49856	0.0107962	0.0240996
ENSMUSG00000017718	Afmid	-1.27233	2.00625	19.8167	8.52331e-06	4.05029e-05
ENSMUSG00000038608	Dock10	-1.27226	8.28377	61.7968	3.80798e-15	6.01832e-14
ENSMUSG00000109847	Gm45278	-1.27138	0.796902	5.1209	0.0236394	0.0474377
ENSMUSG00000097536	2610037D02Rik	-1.27041	1.25664	9.93482	0.00162181	0.00455371
ENSMUSG00000015316	Slamf1	-1.26849	2.5356	24.7449	6.544e-07	3.77556e-06
ENSMUSG00000028076	Cd1d1	-1.26688	3.56326	48.5255	3.26025e-12	3.83987e-11
ENSMUSG00000097815	Gm26809	-1.26602	3.17057	24.9794	5.79475e-07	3.38286e-06
ENSMUSG00000034739	Mfrp	-1.26593	1.78091	6.20413	0.0127453	0.0278207
ENSMUSG00000086495	Gm13778	-1.26591	1.02528	10.8867	0.000968568	0.00287711
ENSMUSG00000104002	Gm38336	-1.26361	1.0019	10.9683	0.000926815	0.00276921
ENSMUSG00000090939	Gm17147	-1.26345	4.33626	16.0986	6.01268e-05	0.000236828
ENSMUSG00000047793	Sned1	-1.26323	1.45939	7.69673	0.00553211	0.0134423
ENSMUSG00000056602	Fry	-1.25962	5.24513	63.2586	1.81277e-15	2.95985e-14
ENSMUSG00000046168	Kcnrg	-1.25927	1.72974	11.1421	0.000843897	0.00254407
ENSMUSG00000052155	Acvr2a	-1.25864	4.2987	30.7716	2.90258e-08	2.08436e-07
ENSMUSG00000021704	Mtx3	-1.25855	5.49193	81.237	2.00206e-19	4.64936e-18
ENSMUSG00000015143	Actn1	-1.25683	4.85732	63.2962	1.77851e-15	2.90713e-14
ENSMUSG00000028525	Pde4b	-1.25649	4.39027	49.4297	2.05606e-12	2.4951e-11
ENSMUSG00000090194	Gm16161	-1.25608	0.748072	5.43595	0.0197263	0.0405632
ENSMUSG00000002265	Peg3	-1.25407	1.29423	7.87911	0.0050009	0.0123256
ENSMUSG00000033446	Lpar6	-1.25226	7.23449	98.0332	4.1142e-23	1.21967e-21
ENSMUSG00000055069	Rab39	-1.25202	5.40668	75.6438	3.39739e-18	7.18993e-17
ENSMUSG00000061393	Acvr2b	-1.25105	3.84884	25.9073	3.58222e-07	2.15852e-06
ENSMUSG00000107726	Gm44037	-1.24825	1.39631	11.0898	0.000868036	0.0026094
ENSMUSG00000004880	Lbr	-1.24759	4.81282	42.1514	8.44752e-11	8.38123e-10
ENSMUSG00000097253	Gm26770	-1.24719	1.04906	9.43139	0.00213302	0.0057812
ENSMUSG00000020709	Adap2	-1.24536	7.58739	26.0548	3.31866e-07	2.00543e-06
ENSMUSG00000028456	Unc13b	-1.24495	3.04582	36.799	1.30959e-09	1.1153e-08
ENSMUSG00000107749	Gm44321	-1.24422	2.1478	14.1875	0.000165463	0.00059209
ENSMUSG00000102143	Gm38057	-1.24388	0.517732	7.86068	0.00505214	0.0124382
ENSMUSG00000104344	Gm38077	-1.24357	1.14675	5.95645	0.0146635	0.03138
ENSMUSG00000063522	2010109I03Rik	-1.24347	1.2947	5.6934	0.0170288	0.0356911
ENSMUSG00000070315	4930581F22Rik	-1.24275	3.59754	43.3003	4.69505e-11	4.79985e-10
ENSMUSG00000042286	Stab1	-1.24258	9.77602	45.1653	1.81086e-11	1.95106e-10
ENSMUSG00000105881	4932422M17Rik	-1.24181	0.998643	10.3447	0.00129846	0.00374501
ENSMUSG00000038530	Rgs4	-1.2414	1.43028	8.43778	0.00367504	0.00935872
ENSMUSG00000084911	Gm16185	-1.24055	3.18521	17.9885	2.22244e-05	9.65229e-05
ENSMUSG00000117121		-1.24029	0.468782	7.3583	0.00667541	0.0158455
ENSMUSG00000047867	Gimap6	-1.23857	4.72397	66.4288	3.62757e-16	6.38081e-15
ENSMUSG00000025537	Phkg1	-1.23838	2.3855	15.8514	6.85141e-05	0.000266858
ENSMUSG00000064916	Gm22573	-1.23743	0.206986	6.35387	0.0117125	0.0258457
ENSMUSG00000087528	9830144P21Rik	-1.23672	1.38991	7.98034	0.0047288	0.0117351
ENSMUSG00000022297	Fzd6	-1.23445	0.926373	7.39574	0.00653784	0.0155592
ENSMUSG00000092035	Peg10	-1.23444	3.66809	48.905	2.68666e-12	3.21551e-11
ENSMUSG00000032846	Zswim6	-1.23395	5.96838	47.4949	5.51477e-12	6.29962e-11
ENSMUSG00000102899	Gm37850	-1.23341	0.627761	7.59203	0.00586268	0.0141479
ENSMUSG00000038205	Prkab2	-1.2316	3.45679	31.3792	2.12242e-08	1.55123e-07
ENSMUSG00000089968	Nckap5los	-1.23127	2.38417	10.8838	0.000970077	0.00288102
ENSMUSG00000021061	Sptb	-1.23097	1.37993	12.7963	0.000347313	0.00115223
ENSMUSG00000034303	Ccdc15	-1.22997	0.983566	8.92865	0.00280732	0.00737955
ENSMUSG00000051149	Adnp	-1.22955	2.04254	8.96201	0.00275651	0.00726216
ENSMUSG00000030344	Akap3	-1.22767	0.508486	5.35778	0.0206301	0.0421055
ENSMUSG00000047139	Cd24a	-1.22747	1.08012	7.81773	0.00517362	0.0126961
ENSMUSG00000020275	Rel	-1.22668	6.25265	76.7742	1.91664e-18	4.10317e-17
ENSMUSG00000000093	Tbx2	-1.22614	0.917207	6.9509	0.00837772	0.019286
ENSMUSG00000103367	Gm38158	-1.22558	4.89979	56.0901	6.92266e-14	9.6757e-13
ENSMUSG00000100813	Gm28874	-1.22534	1.74352	11.4788	0.00070393	0.00216458
ENSMUSG00000097601	Gm26660	-1.22475	0.514834	5.29417	0.021397	0.0434788
ENSMUSG00000048118	Arid4a	-1.22402	6.1824	45.5497	1.48814e-11	1.62465e-10
ENSMUSG00000004151	Etv1	-1.22384	4.61492	78.0365	1.01155e-18	2.22676e-17
ENSMUSG00000026712	Mrc1	-1.22345	6.41408	23.9398	9.93941e-07	5.57368e-06
ENSMUSG00000033439	Trmt13	-1.22315	3.75644	35.4215	2.65544e-09	2.17388e-08
ENSMUSG00000028248	Pnisr	-1.22278	7.93357	68.2042	1.47414e-16	2.68889e-15
ENSMUSG00000079083	Jrkl	-1.22218	4.96614	48.7973	2.83831e-12	3.37788e-11
ENSMUSG00000045268	Zfp691	-1.22206	6.22326	65.9882	4.53631e-16	7.83029e-15
ENSMUSG00000031714	Gab1	-1.2218	6.11117	68.3014	1.40319e-16	2.56264e-15
ENSMUSG00000090936	Gm17705	-1.22149	4.02518	37.1367	1.10133e-09	9.49412e-09
ENSMUSG00000112964	E430024I08Rik	-1.22148	1.90605	11.0051	0.000908606	0.0027181
ENSMUSG00000020142	Slc1a4	-1.2211	2.96164	26.7833	2.27599e-07	1.41644e-06
ENSMUSG00000037112	Sik2	-1.2189	4.60825	16.261	5.51881e-05	0.000219049
ENSMUSG00000107096	Gm43597	-1.21861	1.97559	17.0986	3.5489e-05	0.000148512
ENSMUSG00000038807	Rap1gap2	-1.21773	5.06518	48.2832	3.68901e-12	4.30375e-11
ENSMUSG00000048728	Zfp454	-1.21564	0.866679	7.14773	0.00750589	0.0175244
ENSMUSG00000030084	Plxna1	-1.21501	3.31955	18.2939	1.89313e-05	8.33731e-05
ENSMUSG00000021263	Degs2	-1.21469	1.88667	7.40689	0.00649745	0.0154802
ENSMUSG00000113491	Gm19221	-1.21287	1.39912	8.79159	0.00302623	0.00789402
ENSMUSG00000086291	Gm15513	-1.21265	3.709	38.2311	6.28414e-10	5.617e-09
ENSMUSG00000037355	Uvssa	-1.21186	4.63088	46.999	7.10231e-12	8.04476e-11
ENSMUSG00000075576	Gm12359	-1.21135	1.85948	11.691	0.00062805	0.00195677
ENSMUSG00000108573	Gm44986	-1.21103	0.499922	6.04357	0.0139571	0.0300641
ENSMUSG00000035000	Dpp4	-1.21075	0.36031	6.04564	0.0139407	0.0300356
ENSMUSG00000002109	Ddb2	-1.21044	3.34665	37.9918	7.10418e-10	6.26294e-09
ENSMUSG00000069830	Nlrp1a	-1.20998	3.06926	31.4543	2.04187e-08	1.49532e-07
ENSMUSG00000072915	Gm12258	-1.20882	4.14891	45.4508	1.56522e-11	1.70188e-10
ENSMUSG00000114493	Gm47071	-1.20866	2.12414	18.0197	2.18634e-05	9.50134e-05
ENSMUSG00000042595	Fam199x	-1.20825	4.16471	20.4823	6.01858e-06	2.94773e-05
ENSMUSG00000071337	Tia1	-1.20785	6.19002	99.8827	1.61692e-23	4.93179e-22
ENSMUSG00000030691	Fchsd2	-1.2075	7.18344	114.221	1.16554e-26	4.27836e-25
ENSMUSG00000028212	Ccne2	-1.20648	1.39757	11.2207	0.000808918	0.00245362
ENSMUSG00000085962	Gm16984	-1.20629	0.000806427	5.46154	0.0194395	0.0400494
ENSMUSG00000048895	Cdk5r1	-1.20569	6.3147	77.9335	1.06566e-18	2.33811e-17
ENSMUSG00000057894	Zfp329	-1.20492	5.07089	73.7648	8.80009e-18	1.78573e-16
ENSMUSG00000027981	Rnpc3	-1.20404	4.23703	48.9783	2.58815e-12	3.11116e-11
ENSMUSG00000085890	Tnfsf13os	-1.20375	0.771428	5.14155	0.0233598	0.0469514
ENSMUSG00000097768	2310043M15Rik	-1.20334	0.343294	5.02483	0.0249863	0.0498345
ENSMUSG00000026779	Mastl	-1.20322	-0.127082	5.18363	0.0228007	0.0459524
ENSMUSG00000033949	Trim36	-1.20304	5.52718	97.9581	4.27325e-23	1.26428e-21
ENSMUSG00000099137	Gm10603	-1.20274	1.57379	12.3217	0.000447719	0.00145084
ENSMUSG00000070643	Sox13	-1.20213	2.16019	19.9383	7.99836e-06	3.82293e-05
ENSMUSG00000016552	Foxred2	-1.20061	1.61959	14.1751	0.000166557	0.000595861
ENSMUSG00000090622	A930033H14Rik	-1.19831	2.41398	9.37104	0.0022044	0.00595277
ENSMUSG00000095123	Gm21781	-1.19779	4.09862	39.0891	4.04895e-10	3.69046e-09
ENSMUSG00000099384	1700110C19Rik	-1.19746	2.65665	11.313	0.000769649	0.00234896
ENSMUSG00000049939	Lrrc4	-1.19689	1.796	16.4642	4.95785e-05	0.000198919
ENSMUSG00000006445	Epha2	-1.19665	4.98177	10.9279	0.000947245	0.00281943
ENSMUSG00000021130	Galnt16	-1.19641	2.43912	18.5376	1.66584e-05	7.42925e-05
ENSMUSG00000108621	Gm37494	-1.19507	6.61986	72.761	1.46337e-17	2.90183e-16
ENSMUSG00000112297	Gm17816	-1.19474	0.431337	5.2353	0.022133	0.0447775
ENSMUSG00000103509	Gm38372	-1.19407	2.79333	7.55451	0.005986	0.0144055
ENSMUSG00000090164	BC035044	-1.19369	5.84925	68.1469	1.51756e-16	2.76468e-15
ENSMUSG00000033152	Podxl2	-1.19268	1.43256	7.86037	0.00505301	0.0124382
ENSMUSG00000097709	2810429I04Rik	-1.19195	1.9493	20.0321	7.61532e-06	3.65402e-05
ENSMUSG00000104253	Gm37174	-1.19134	0.702375	9.02626	0.00266129	0.0070351
ENSMUSG00000105349	Gm43604	-1.1913	0.441107	6.09977	0.0135199	0.0292735
ENSMUSG00000016763	Scube1	-1.19045	2.86802	25.7977	3.79135e-07	2.27619e-06
ENSMUSG00000097971	Gm26917	-1.18974	8.48907	14.4063	0.000147309	0.000533843
ENSMUSG00000097488	4732487G21Rik	-1.18904	1.7129	11.3007	0.000774786	0.00236123
ENSMUSG00000025450	Gm9752	-1.189	2.20559	10.3713	0.0012799	0.00369787
ENSMUSG00000110605	Gm32856	-1.18891	2.30334	17.7562	2.51098e-05	0.000107979
ENSMUSG00000076621	Ighj1	-1.18863	1.98847	9.10632	0.00254728	0.00677002
ENSMUSG00000016933	Plcg1	-1.18818	6.99042	105.973	7.47517e-25	2.46281e-23
ENSMUSG00000099398	Ms4a14	-1.18804	1.70422	7.81579	0.00517917	0.0127057
ENSMUSG00000068735	Trp53i11	-1.18759	4.92388	48.587	3.15963e-12	3.73923e-11
ENSMUSG00000027695	Pld1	-1.18692	6.8007	71.4083	2.9044e-17	5.62367e-16
ENSMUSG00000045817	Zfp36l2	-1.18686	8.87361	51.7484	6.30872e-13	8.00385e-12
ENSMUSG00000073664	Nbeal1	-1.18644	5.20139	30.9874	2.59702e-08	1.87678e-07
ENSMUSG00000052821	Cysltr1	-1.1864	6.11699	89.5891	2.93133e-21	7.78512e-20
ENSMUSG00000013973	Dedd	-1.18518	3.80255	17.7096	2.57318e-05	0.000110494
ENSMUSG00000108897	Gm44861	-1.18513	4.90709	12.9629	0.000317717	0.00106335
ENSMUSG00000044937	Ttc41	-1.18474	1.55277	11.5282	0.000685482	0.0021161
ENSMUSG00000097571	Jpx	-1.18223	2.59055	18.8366	1.42409e-05	6.44632e-05
ENSMUSG00000108753	Gm45094	-1.18189	1.53086	9.15346	0.00248248	0.00662756
ENSMUSG00000024298	Zfp871	-1.18175	5.05488	16.5116	4.83529e-05	0.000194529
ENSMUSG00000104358	Gm37127	-1.18174	0.649432	6.64893	0.00992153	0.0223495
ENSMUSG00000052942	Glis3	-1.17959	3.18899	31.6187	1.87617e-08	1.38287e-07
ENSMUSG00000087475	4933406I18Rik	-1.17812	1.88403	14.0312	0.000179797	0.000637675
ENSMUSG00000097504	4930516B21Rik	-1.17811	3.83793	39.4722	3.3277e-10	3.07091e-09
ENSMUSG00000049791	Fzd4	-1.17655	4.80692	47.6133	5.19149e-12	5.96255e-11
ENSMUSG00000039997	Ifi203	-1.17654	2.99752	18.033	2.17103e-05	9.44035e-05
ENSMUSG00000040929	Rfx3	-1.17589	4.12493	49.1354	2.38894e-12	2.88016e-11
ENSMUSG00000025997	Ikzf2	-1.17557	3.36018	26.8976	2.14522e-07	1.34183e-06
ENSMUSG00000054737	Zfp182	-1.17528	4.79227	45.2232	1.75812e-11	1.89838e-10
ENSMUSG00000086826	Gm11739	-1.17275	2.01273	6.77393	0.00924987	0.0210319
ENSMUSG00000030516	Tjp1	-1.17236	7.44968	61.9266	3.56504e-15	5.64039e-14
ENSMUSG00000020785	Camkk1	-1.17225	4.05044	38.1924	6.41015e-10	5.70206e-09
ENSMUSG00000114584	Gm47694	-1.17157	2.80391	14.0904	0.00017423	0.000620311
ENSMUSG00000037762	Slc16a9	-1.17122	1.49038	6.18344	0.0128951	0.0281146
ENSMUSG00000087639	Gm15512	-1.17062	1.66058	7.03043	0.0080136	0.0185575
ENSMUSG00000047643	Gm5454	-1.16978	1.48978	11.5546	0.000675818	0.00209019
ENSMUSG00000022311	Csmd3	-1.16968	6.36757	75.5921	3.48748e-18	7.37005e-17
ENSMUSG00000063611	Gm10134	-1.16946	3.92073	31.5168	1.97721e-08	1.45012e-07
ENSMUSG00000026424	Gpr37l1	-1.16938	2.77155	5.41842	0.0199254	0.0408952
ENSMUSG00000097737	Gm26530	-1.16913	1.86994	18.7223	1.51205e-05	6.80492e-05
ENSMUSG00000097131	D230017M19Rik	-1.16843	3.52961	39.9591	2.59334e-10	2.42652e-09
ENSMUSG00000020437	Myo1g	-1.16748	5.81602	66.2097	4.05408e-16	7.06384e-15
ENSMUSG00000028957	Per3	-1.16702	5.21334	79.5904	4.60654e-19	1.04196e-17
ENSMUSG00000000753	Serpinf1	-1.1651	5.02455	45.4487	1.56693e-11	1.70188e-10
ENSMUSG00000096573	1700009J07Rik	-1.16472	1.04765	7.3224	0.00681004	0.0161418
ENSMUSG00000107876	Gm43936	-1.16338	0.169665	6.98528	0.00821827	0.018978
ENSMUSG00000074899	Sptbn5	-1.16175	2.87763	14.2396	0.00016095	0.000577896
ENSMUSG00000023274	Cd4	-1.16072	1.48101	7.95374	0.0047988	0.0118889
ENSMUSG00000026579	F5	-1.1606	2.6256	13.6445	0.000220889	0.000769029
ENSMUSG00000027677	Ttc14	-1.15925	6.76229	74.3028	6.70069e-18	1.37863e-16
ENSMUSG00000021806	Nid2	-1.15916	5.06868	46.2577	1.03678e-11	1.1523e-10
ENSMUSG00000098041	Gm26981	-1.15741	0.303947	5.46014	0.0194551	0.0400667
ENSMUSG00000040321	Zfp770	-1.15721	4.89386	48.9181	2.66877e-12	3.20115e-11
ENSMUSG00000098066	Gm26944	-1.15655	1.31769	9.81294	0.00173288	0.00483488
ENSMUSG00000106475	Gm43011	-1.15653	0.77554	8.04345	0.00456684	0.011379
ENSMUSG00000097777	Gm16794	-1.15648	1.33511	11.43	0.000722661	0.00221653
ENSMUSG00000044072	Eml6	-1.15584	3.60246	41.6717	1.0796e-10	1.05695e-09
ENSMUSG00000079168	Cd209g	-1.15549	1.92457	9.1388	0.00250245	0.00666885
ENSMUSG00000024013	Fgd2	-1.15537	9.30795	66.1191	4.24482e-16	7.35288e-15
ENSMUSG00000086725	A630052C17Rik	-1.15521	2.6763	26.2921	2.93479e-07	1.79472e-06
ENSMUSG00000005864	Cnga2	-1.15352	0.123721	5.1436	0.0233322	0.0469023
ENSMUSG00000103081	Pcdhgb8	-1.15254	1.0534	6.71103	0.00958183	0.0217033
ENSMUSG00000028644	Ermap	-1.15244	3.193	37.5148	9.07229e-10	7.90379e-09
ENSMUSG00000004661	Arid3b	-1.15202	6.12956	67.5449	2.05941e-16	3.69271e-15
ENSMUSG00000016624	Phf21b	-1.15172	2.83697	11.8552	0.000575012	0.00180867
ENSMUSG00000032306	Mpi	-1.1508	5.98037	81.917	1.41921e-19	3.33244e-18
ENSMUSG00000024274	Zscan30	-1.14988	0.474972	5.10131	0.0239078	0.0479226
ENSMUSG00000032702	Kank1	-1.14852	0.883351	5.44223	0.0196556	0.0404458
ENSMUSG00000060301	2610008E11Rik	-1.14753	4.88577	50.5962	1.13463e-12	1.42122e-11
ENSMUSG00000117333		-1.14749	0.448651	5.82725	0.0157798	0.0334308
ENSMUSG00000014547	Wdfy2	-1.14643	6.88007	82.4637	1.07631e-19	2.54342e-18
ENSMUSG00000067879	3110035E14Rik	-1.14617	1.16033	5.56403	0.0183332	0.0380475
ENSMUSG00000072872	Rybp	-1.14546	4.00453	27.4963	1.57396e-07	1.0049e-06
ENSMUSG00000021200	Asb2	-1.14503	6.33833	48.4992	3.30422e-12	3.88548e-11
ENSMUSG00000100201	Gm29093	-1.1449	1.64466	11.281	0.00078306	0.00238399
ENSMUSG00000026594	Ralgps2	-1.14476	5.29796	67.4803	2.12807e-16	3.80659e-15
ENSMUSG00000024677	Ms4a6b	-1.14414	5.95093	87.7254	7.52015e-21	1.94146e-19
ENSMUSG00000113328	Gm47260	-1.14165	2.65712	12.4914	0.000408825	0.00133504
ENSMUSG00000055435	Maf	-1.14123	8.92132	73.1428	1.20602e-17	2.41744e-16
ENSMUSG00000026830	Ermn	-1.14091	0.888623	5.22057	0.0223213	0.0450967
ENSMUSG00000087674	4930447M23Rik	-1.13844	1.34139	8.48547	0.00357994	0.00915755
ENSMUSG00000038172	Ttc39b	-1.13747	5.88871	76.1355	2.64854e-18	5.63739e-17
ENSMUSG00000048647	Exd1	-1.13528	0.800524	7.05458	0.00790628	0.0183319
ENSMUSG00000042246	Tmc7	-1.13437	5.32867	35.788	2.19997e-09	1.81811e-08
ENSMUSG00000054648	Zfp869	-1.13204	4.83207	24.9618	5.84766e-07	3.40971e-06
ENSMUSG00000037795	N4bp2	-1.13007	4.28883	54.3584	1.67061e-13	2.22843e-12
ENSMUSG00000087408	Cers1	-1.12802	0.718375	5.68637	0.0170972	0.0357889
ENSMUSG00000005628	Tmod4	-1.12653	0.344148	5.14836	0.0232684	0.046793
ENSMUSG00000024276	Zfp397	-1.12646	5.73908	54.2884	1.73122e-13	2.30305e-12
ENSMUSG00000085882	2610507I01Rik	-1.12508	3.31646	13.8098	0.000202279	0.000709078
ENSMUSG00000085227	6330418K02Rik	-1.12499	3.46722	24.8473	6.20556e-07	3.60137e-06
ENSMUSG00000080797	Gm15760	-1.12447	1.21123	9.1428	0.00249699	0.00665888
ENSMUSG00000112925	Gm31763	-1.12443	0.454685	5.41833	0.0199265	0.0408952
ENSMUSG00000073125	Xlr3b	-1.12443	2.47565	5.26266	0.0217877	0.0441696
ENSMUSG00000028989	Angptl7	-1.12336	3.52185	22.6518	1.94177e-06	1.03962e-05
ENSMUSG00000036062	Phf24	-1.12297	1.15833	10.0756	0.00150247	0.00425786
ENSMUSG00000114535	Gm47246	-1.12296	0.536519	5.64084	0.0175468	0.0365901
ENSMUSG00000027896	Slc16a4	-1.12198	1.89916	9.63984	0.00190402	0.00523048
ENSMUSG00000049164	Zfp518a	-1.12185	5.31215	42.8475	5.91766e-11	5.98769e-10
ENSMUSG00000043832	Clec4a3	-1.12051	5.70268	60.783	6.37265e-15	9.85064e-14
ENSMUSG00000026425	Srgap2	-1.11983	9.57202	64.6882	8.77407e-16	1.46495e-14
ENSMUSG00000044551	9930012K11Rik	-1.11855	1.36318	8.03166	0.00459667	0.0114456
ENSMUSG00000102374	Gm38387	-1.11819	0.553673	5.09108	0.0240492	0.0481799
ENSMUSG00000039456	Morc3	-1.11729	6.86638	77.9188	1.07366e-18	2.3495e-17
ENSMUSG00000082860	Gm13204	-1.11636	0.858598	5.60418	0.0179176	0.037295
ENSMUSG00000034009	Rxfp1	-1.11601	1.96916	13.8634	0.000196589	0.00069077
ENSMUSG00000085637	1700048M11Rik	-1.11569	0.814277	8.6547	0.00326219	0.00842633
ENSMUSG00000042377	Fam83g	-1.11502	1.70848	13.4605	0.000243634	0.000839134
ENSMUSG00000031665	Sall1	-1.11396	9.76488	59.4044	1.28379e-14	1.92803e-13
ENSMUSG00000111793	Gm47950	-1.11381	0.996539	5.88217	0.015295	0.032513
ENSMUSG00000078490	Cfap74	-1.11374	6.4007	42.0987	8.67805e-11	8.59266e-10
ENSMUSG00000089984	Fbxo24	-1.1137	1.05686	5.26566	0.0217501	0.0441056
ENSMUSG00000056234	Ncoa4	-1.11276	5.87445	24.9367	5.92429e-07	3.45032e-06
ENSMUSG00000073787	Gm10575	-1.11266	2.706	15.5645	7.97388e-05	0.000305748
ENSMUSG00000050447	Lypd6	-1.11261	2.66813	22.5639	2.03263e-06	1.08239e-05
ENSMUSG00000030330	Ing4	-1.11223	2.13179	12.1528	0.000490142	0.00156975
ENSMUSG00000115955	AL731707.1	-1.11207	0.679528	5.69564	0.0170071	0.0356505
ENSMUSG00000073599	Ecscr	-1.11082	6.81574	31.2563	2.26112e-08	1.64205e-07
ENSMUSG00000079470	Utp14b	-1.11037	1.02257	7.46629	0.00628652	0.0150504
ENSMUSG00000115816	CT009530.1	-1.11022	3.54073	18.3022	1.88485e-05	8.30829e-05
ENSMUSG00000046572	Zfp518b	-1.10836	2.76058	19.3381	1.09498e-05	5.05555e-05
ENSMUSG00000087623	Gm12404	-1.10801	1.81454	10.5566	0.00115774	0.00337998
ENSMUSG00000044950	Pwwp2a	-1.10765	6.8678	94.4701	2.48825e-22	7.02456e-21
ENSMUSG00000084946	Dlx1as	-1.10736	1.01053	9.75366	0.00178966	0.00496695
ENSMUSG00000105504	Gbp5	-1.10491	4.10434	32.6554	1.10035e-08	8.39043e-08
ENSMUSG00000041920	Slc16a6	-1.10238	7.12273	43.8258	3.58934e-11	3.7235e-10
ENSMUSG00000102559	Gm37570	-1.10165	1.02643	6.47656	0.0109306	0.0243226
ENSMUSG00000038872	Zfhx3	-1.10141	7.5664	40.2408	2.24513e-10	2.11677e-09
ENSMUSG00000012640	Zfp715	-1.10136	7.14457	59.1713	1.44528e-14	2.15308e-13
ENSMUSG00000018417	Myo1b	-1.09958	5.62462	68.3706	1.35483e-16	2.47739e-15
ENSMUSG00000070509	Rgma	-1.0991	0.71543	5.40018	0.0201347	0.0412595
ENSMUSG00000000686	Abhd15	-1.09896	4.84472	29.2016	6.52269e-08	4.43633e-07
ENSMUSG00000018476	Kdm6b	-1.09801	4.88222	25.7711	3.84394e-07	2.30589e-06
ENSMUSG00000031907	Zfp90	-1.0976	3.71949	24.4003	7.82571e-07	4.46833e-06
ENSMUSG00000108037	Gm44597	-1.09707	1.96037	7.36213	0.00666117	0.0158193
ENSMUSG00000070868	Skint3	-1.0961	0.688616	5.17042	0.0229747	0.0462695
ENSMUSG00000020700	Map3k3	-1.09553	6.89659	28.128	1.1355e-07	7.39978e-07
ENSMUSG00000024430	Cabyr	-1.09509	0.0353841	5.8211	0.015835	0.0335262
ENSMUSG00000049717	Lig4	-1.09464	3.0637	26.2984	2.92533e-07	1.78968e-06
ENSMUSG00000024330	Col11a2	-1.09342	2.40524	18.48	1.71695e-05	7.62729e-05
ENSMUSG00000028273	Pdlim5	-1.09318	5.63047	48.186	3.87653e-12	4.50829e-11
ENSMUSG00000006705	Pknox1	-1.09254	6.14551	85.8972	1.89535e-20	4.72816e-19
ENSMUSG00000100826	Snhg14	-1.09249	0.682489	6.33469	0.0118399	0.026052
ENSMUSG00000032593	Amigo3	-1.09231	2.58776	18.2997	1.88735e-05	8.3168e-05
ENSMUSG00000097290	1300002E11Rik	-1.09225	3.74388	35.6692	2.33835e-09	1.92601e-08
ENSMUSG00000079364	Gm3558	-1.09086	0.658305	6.95402	0.00836309	0.0192583
ENSMUSG00000053819	Camk2d	-1.09056	6.27807	79.8547	4.02988e-19	9.17138e-18
ENSMUSG00000026271	Gpr35	-1.09046	4.01675	47.5345	5.40454e-12	6.17846e-11
ENSMUSG00000109245	Gm44860	-1.08984	4.34564	10.1039	0.00147954	0.00419837
ENSMUSG00000040651	Fam208a	-1.08934	5.86249	64.8835	7.94606e-16	1.33424e-14
ENSMUSG00000048280	Zfp738	-1.08912	4.80841	26.0748	3.28442e-07	1.98718e-06
ENSMUSG00000029765	Plxna4	-1.08887	6.34566	45.7822	1.32161e-11	1.45034e-10
ENSMUSG00000024174	Pot1b	-1.08841	5.14672	39.796	2.81916e-10	2.63115e-09
ENSMUSG00000107041	Gm42735	-1.08658	0.459542	6.49446	0.0108211	0.0241334
ENSMUSG00000015243	Abca1	-1.0865	8.6238	47.5846	5.26815e-12	6.03654e-11
ENSMUSG00000090173	Fbxw10	-1.0865	2.26039	13.4775	0.000241441	0.000832742
ENSMUSG00000041117	Ccdc8	-1.08619	0.661053	7.06427	0.00786363	0.0182502
ENSMUSG00000084998	Gm16279	-1.08568	1.14097	9.68316	0.00185964	0.00513049
ENSMUSG00000099478	Gm28370	-1.08466	2.79987	17.1867	3.38796e-05	0.0001423
ENSMUSG00000086682	Gm16023	-1.0843	1.30834	9.38625	0.00218619	0.00591014
ENSMUSG00000089774	Slc5a3	-1.08323	4.06776	17.9082	2.31818e-05	0.000100448
ENSMUSG00000030655	Smg1	-1.08307	8.01597	38.1121	6.67935e-10	5.92017e-09
ENSMUSG00000029386	Tctn2	-1.08239	0.966411	5.82008	0.0158443	0.0335409
ENSMUSG00000006369	Fbln1	-1.0821	0.997605	7.01362	0.00808919	0.018712
ENSMUSG00000034107	Ano7	-1.08155	3.96527	26.3972	2.77936e-07	1.70886e-06
ENSMUSG00000116114	AC163018.1	-1.08107	0.800553	6.54654	0.0105088	0.0235434
ENSMUSG00000074342	I830077J02Rik	-1.08006	6.54778	27.716	1.40494e-07	9.04013e-07
ENSMUSG00000086740	Gm17029	-1.07999	1.09993	5.85647	0.0155199	0.0329391
ENSMUSG00000021699	Pde4d	-1.07998	1.74562	7.02249	0.00804923	0.0186254
ENSMUSG00000046908	Ltb4r1	-1.07984	0.578721	7.30638	0.00687102	0.0162603
ENSMUSG00000024924	Vldlr	-1.07878	0.937842	5.55165	0.0184633	0.0382692
ENSMUSG00000027438	Napb	-1.07709	2.84747	15.0186	0.000106455	0.000397272
ENSMUSG00000035711	Dok3	-1.07639	6.1255	42.6379	6.587e-11	6.61069e-10
ENSMUSG00000102861	Gm37637	-1.07487	0.839095	6.59789	0.01021	0.0229363
ENSMUSG00000058396	Gpr182	-1.07479	0.70302	5.72056	0.0167674	0.035223
ENSMUSG00000072761	Gm6712	-1.07452	1.76551	6.4835	0.010888	0.0242475
ENSMUSG00000019564	Arid3a	-1.07361	5.54755	33.7677	6.2101e-09	4.89952e-08
ENSMUSG00000104156	Gm38102	-1.07334	1.65849	8.64434	0.00328079	0.00847142
ENSMUSG00000035236	Scai	-1.07273	4.84165	49.88	1.63444e-12	2.00151e-11
ENSMUSG00000113078	Gm48734	-1.07188	0.33481	5.42379	0.0198642	0.0407916
ENSMUSG00000033705	Stard9	-1.07125	8.14865	22.5978	1.99709e-06	1.06461e-05
ENSMUSG00000014164	Klhl3	-1.07121	4.11467	41.7981	1.01204e-10	9.93437e-10
ENSMUSG00000079645	Gm17193	-1.07039	1.17244	7.43286	0.00640435	0.0153028
ENSMUSG00000033799	Fam208b	-1.07016	5.45252	19.6618	9.24307e-06	4.35316e-05
ENSMUSG00000100280	Gm28417	-1.06883	3.86207	26.0773	3.28025e-07	1.98627e-06
ENSMUSG00000085287	4833418N02Rik	-1.06882	2.06989	12.9912	0.000312962	0.00104933
ENSMUSG00000032265	Fam46a	-1.06862	6.29521	33.5736	6.86175e-09	5.39351e-08
ENSMUSG00000038357	Camp	-1.06662	2.87922	7.72275	0.00545293	0.0132848
ENSMUSG00000039046	Usp6nl	-1.06431	4.887	68.673	1.16221e-16	2.13573e-15
ENSMUSG00000028514	Usp24	-1.0639	7.34915	45.9327	1.22385e-11	1.34805e-10
ENSMUSG00000030660	Pik3c2a	-1.06375	4.90644	22.1979	2.45947e-06	1.29109e-05
ENSMUSG00000097277	2900076A07Rik	-1.06349	3.10018	24.348	8.04085e-07	4.58022e-06
ENSMUSG00000074344	Tmigd3	-1.06312	2.25488	17.2323	3.30774e-05	0.000139208
ENSMUSG00000026604	Ptpn14	-1.06265	1.22982	7.66251	0.00563801	0.0136816
ENSMUSG00000066415	Msl2	-1.06232	6.97346	54.0122	1.99245e-13	2.63399e-12
ENSMUSG00000025437	Usp33	-1.06172	4.94195	18.3255	1.86201e-05	8.21248e-05
ENSMUSG00000055240	Zfp101	-1.06163	3.19883	16.0761	6.08474e-05	0.000239329
ENSMUSG00000028256	Odf2l	-1.06162	3.8433	30.6457	3.09718e-08	2.21443e-07
ENSMUSG00000114025	AC154636.2	-1.06066	2.71482	19.6399	9.34945e-06	4.39627e-05
ENSMUSG00000061882	Ccdc62	-1.06054	4.03653	34.4529	4.36691e-09	3.49944e-08
ENSMUSG00000037940	Inpp4b	-1.05991	6.45713	74.3413	6.57137e-18	1.35579e-16
ENSMUSG00000029178	Klf3	-1.05961	7.25229	91.5972	1.06241e-21	2.91041e-20
ENSMUSG00000078546	Zfp995	-1.05906	1.90282	12.9607	0.0003181	0.00106415
ENSMUSG00000059588	Calcrl	-1.05677	4.35385	46.0915	1.12859e-11	1.24778e-10
ENSMUSG00000031445	Proz	-1.05631	1.86963	13.0624	0.000301289	0.0010141
ENSMUSG00000028698	Pik3r3	-1.05569	1.64574	10.016	0.00155183	0.00437678
ENSMUSG00000032086	Bace1	-1.05544	3.65258	29.4666	5.68874e-08	3.90867e-07
ENSMUSG00000006344	Ggt5	-1.0554	5.80712	72.9735	1.31404e-17	2.61623e-16
ENSMUSG00000022122	Ednrb	-1.05457	2.06713	9.10735	0.00254585	0.00676743
ENSMUSG00000098108	Gm27008	-1.05411	1.58842	6.69372	0.00967532	0.0218882
ENSMUSG00000034653	Ythdc2	-1.05385	4.12481	38.2134	6.34168e-10	5.65476e-09
ENSMUSG00000040459	Arglu1	-1.05303	7.51598	81.9398	1.40296e-19	3.29953e-18
ENSMUSG00000101493	2810405F17Rik	-1.05197	1.18067	7.81443	0.00518307	0.0127083
ENSMUSG00000103039	Gm37123	-1.05133	1.42044	5.50078	0.019008	0.0392772
ENSMUSG00000116815		-1.05101	0.459892	5.62983	0.0176574	0.0368155
ENSMUSG00000078144	Capns2	-1.05033	3.27624	12.5448	0.000397303	0.00130144
ENSMUSG00000034987	Hrh2	-1.04925	4.24981	21.7982	3.02891e-06	1.56175e-05
ENSMUSG00000026409	Pfkfb2	-1.04889	4.01386	38.2154	6.33515e-10	5.65235e-09
ENSMUSG00000105408	Gm7285	-1.04853	1.42468	8.62324	0.003319	0.00856111
ENSMUSG00000038594	Cep85l	-1.04815	4.95043	55.1768	1.10163e-13	1.51033e-12
ENSMUSG00000063535	Zfp773	-1.04784	3.41886	21.6798	3.22163e-06	1.65478e-05
ENSMUSG00000021087	Rtn1	-1.04574	6.27108	66.1232	4.23597e-16	7.34615e-15
ENSMUSG00000070709	Zfp974	-1.04536	3.86446	27.2665	1.77254e-07	1.12056e-06
ENSMUSG00000029832	Nfe2l3	-1.04511	1.00604	8.23918	0.00409956	0.0103395
ENSMUSG00000028517	Plpp3	-1.04487	3.3593	12.3077	0.000451102	0.00145925
ENSMUSG00000034163	Zfc3h1	-1.04463	6.5909	56.8599	4.67983e-14	6.71472e-13
ENSMUSG00000104546	Gm43858	-1.0444	2.601	7.23221	0.00716072	0.0168435
ENSMUSG00000109203	Gm32849	-1.04406	1.40274	5.08844	0.0240858	0.0482467
ENSMUSG00000056174	Col8a2	-1.04352	1.36976	5.13294	0.023476	0.0471592
ENSMUSG00000032375	Aph1b	-1.04333	1.47722	8.67549	0.00322518	0.00835261
ENSMUSG00000042817	Flt3	-1.04329	2.09606	10.5701	0.00114929	0.0033573
ENSMUSG00000039004	Bmp6	-1.04239	0.851824	5.83646	0.0156973	0.0332773
ENSMUSG00000049436	Upk1b	-1.04162	6.88462	45.8352	1.28629e-11	1.41368e-10
ENSMUSG00000055897	Ppp4r1l-ps	-1.04105	5.41985	72.5693	1.61272e-17	3.18517e-16
ENSMUSG00000021134	Srsf5	-1.04046	9.13574	66.4821	3.53091e-16	6.22559e-15
ENSMUSG00000033004	Mycbp2	-1.03962	7.81371	33.2208	8.22659e-09	6.38824e-08
ENSMUSG00000053205	Styx	-1.03944	3.46315	29.6561	5.15902e-08	3.57793e-07
ENSMUSG00000090626	Tex9	-1.03856	1.35726	9.10808	0.00254483	0.00676595
ENSMUSG00000024620	Pdgfrb	-1.0382	1.53207	5.18097	0.0228356	0.0460102
ENSMUSG00000051984	Sec31b	-1.03793	1.18944	6.46566	0.0109979	0.0244355
ENSMUSG00000004127	Trmt10a	-1.03775	3.45776	29.8314	4.71303e-08	3.29022e-07
ENSMUSG00000107200	Gm43039	-1.03771	1.06376	5.28343	0.0215293	0.0437116
ENSMUSG00000032496	Ltf	-1.03752	4.08037	7.74441	0.00538792	0.0131592
ENSMUSG00000024486	Hbegf	-1.03655	1.40594	6.32625	0.0118964	0.0261685
ENSMUSG00000072809	9330160F10Rik	-1.03608	1.0212	6.54525	0.0105164	0.0235569
ENSMUSG00000051396	Gm45902	-1.03608	2.49305	16.7246	4.3217e-05	0.000176556
ENSMUSG00000108883	Gm44623	-1.036	0.921091	5.38314	0.0203322	0.0416097
ENSMUSG00000054545	Ugt1a6a	-1.0354	1.11932	7.73517	0.00541556	0.0132127
ENSMUSG00000072763	5430403G16Rik	-1.03497	1.99266	11.2192	0.000809558	0.00245456
ENSMUSG00000034445	Cyb561a3	-1.03443	6.22276	39.2839	3.66453e-10	3.36465e-09
ENSMUSG00000021254	Gpatch2l	-1.03411	5.03486	19.9994	7.74679e-06	3.71109e-05
ENSMUSG00000053291	Rab4b	-1.03398	1.48345	7.65989	0.00564619	0.0136957
ENSMUSG00000089857	Zfp882	-1.03362	2.85081	14.7098	0.000125391	0.000460503
ENSMUSG00000021908	Gm6768	-1.03359	3.37433	13.3145	0.000263365	0.000899022
ENSMUSG00000085112	A530072M11Rik	-1.03293	1.07669	6.08213	0.0136556	0.029516
ENSMUSG00000035835	Plppr3	-1.03252	3.00809	13.4083	0.000250521	0.000861648
ENSMUSG00000044471	Lncpint	-1.03202	2.27336	8.22203	0.00413848	0.0104258
ENSMUSG00000038664	Herc1	-1.03194	6.53919	47.5813	5.27704e-12	6.03805e-11
ENSMUSG00000036353	P2ry12	-1.03183	11.3983	57.7297	3.00729e-14	4.36573e-13
ENSMUSG00000023044	Csad	-1.03097	6.50047	49.8271	1.67907e-12	2.05107e-11
ENSMUSG00000022263	Trio	-1.02884	7.28573	48.9157	2.67203e-12	3.20115e-11
ENSMUSG00000054387	Mdm4	-1.02776	8.08865	41.4552	1.20605e-10	1.17558e-09
ENSMUSG00000085396	Firre	-1.02747	6.88051	54.0372	1.96732e-13	2.6031e-12
ENSMUSG00000100213	Gm28151	-1.02611	2.96792	18.9984	1.30829e-05	5.96596e-05
ENSMUSG00000112433	Gm30122	-1.02562	0.525688	6.41385	0.0113234	0.0250722
ENSMUSG00000009145	Dqx1	-1.0251	3.30477	24.8613	6.16083e-07	3.57681e-06
ENSMUSG00000097284	4930480K23Rik	-1.0243	0.842726	6.31805	0.0119515	0.0262858
ENSMUSG00000034906	Ncaph	-1.02413	4.16414	29.041	7.08641e-08	4.78891e-07
ENSMUSG00000071103	1700029J07Rik	-1.02132	2.6481	15.7639	7.17598e-05	0.000277891
ENSMUSG00000001036	Epn2	-1.02032	4.9092	57.3954	3.56439e-14	5.15426e-13
ENSMUSG00000086264	Gm15850	-1.01979	2.52929	9.40864	0.00215966	0.00584483
ENSMUSG00000032484	Ngp	-1.0189	4.8482	9.59616	0.00194985	0.00534051
ENSMUSG00000031134	Rbmx	-1.01862	5.93042	61.4521	4.5364e-15	7.12389e-14
ENSMUSG00000054640	Slc8a1	-1.01827	5.25286	17.1829	3.39478e-05	0.000142546
ENSMUSG00000040722	Scamp5	-1.01786	7.77046	71.45	2.84368e-17	5.5133e-16
ENSMUSG00000087370	Tmem170b	-1.01729	7.04608	68.7801	1.10076e-16	2.03289e-15
ENSMUSG00000021071	Trim9	-1.01686	0.94501	5.19477	0.0226549	0.0456897
ENSMUSG00000065434	Mir7-1	-1.01683	1.19744	9.89258	0.00165946	0.00464493
ENSMUSG00000038463	Olfml2b	-1.0159	4.95652	30.5854	3.19486e-08	2.27766e-07
ENSMUSG00000086370	Ftx	-1.01589	3.64048	25.3115	4.87798e-07	2.88179e-06
ENSMUSG00000050714	Zbtb26	-1.01581	4.21327	47.6642	5.05852e-12	5.81435e-11
ENSMUSG00000027860	Vangl1	-1.01522	2.67288	14.8498	0.000116419	0.000431625
ENSMUSG00000021666	Gfm2	-1.01467	9.0983	48.3931	3.48792e-12	4.08203e-11
ENSMUSG00000098320	Vis1	-1.01457	2.18985	8.93781	0.00279328	0.00734856
ENSMUSG00000098206	A430106G13Rik	-1.01437	0.834599	6.27713	0.0122306	0.0268159
ENSMUSG00000026950	Neb	-1.01432	1.21965	7.63819	0.00571451	0.0138287
ENSMUSG00000037972	Snn	-1.01422	7.70439	66.6727	3.20547e-16	5.67887e-15
ENSMUSG00000022900	Ildr1	-1.01367	2.65571	12.8245	0.000342111	0.00113701
ENSMUSG00000041202	Pla2g2d	-1.01358	1.98222	9.74751	0.00179566	0.0049781
ENSMUSG00000028268	Gbp3	-1.01331	4.11241	32.266	1.34447e-08	1.01266e-07
ENSMUSG00000096904	Gm3591	-1.01313	4.381	25.8057	3.77576e-07	2.26776e-06
ENSMUSG00000056724	Nbeal2	-1.01267	7.14978	43.6253	3.97655e-11	4.11077e-10
ENSMUSG00000096718	Zfp781	-1.0109	0.793064	6.66953	0.00980749	0.0221466
ENSMUSG00000090873	Gm17112	-1.01003	2.86417	18.7468	1.49274e-05	6.73029e-05
ENSMUSG00000069892	9930111J21Rik2	-1.00958	5.89366	15.2835	9.25238e-05	0.000349605
ENSMUSG00000007850	Hnrnph1	-1.0095	9.09847	61.5704	4.27187e-15	6.7299e-14
ENSMUSG00000091418	Gm3164	-1.00792	2.68488	15.7386	7.27269e-05	0.000281341
ENSMUSG00000022836	Mylk	-1.007	2.00983	5.46028	0.0194535	0.0400667
ENSMUSG00000068966	Zbtb34	-1.00578	5.80611	66.2527	3.96655e-16	6.92765e-15
ENSMUSG00000067942	Zfp160	-1.0047	5.10862	36.1981	1.78245e-09	1.49055e-08
ENSMUSG00000031431	Tsc22d3	-1.004	6.09463	11.1177	0.000855063	0.00257354
ENSMUSG00000035829	Ppp1r26	-1.00395	3.51489	25.219	5.11759e-07	3.01252e-06
ENSMUSG00000078779	Zfp59	-1.00388	2.91427	12.3602	0.000438595	0.00142659
ENSMUSG00000023993	Treml1	-1.00376	3.0009	21.2309	4.07137e-06	2.05136e-05
ENSMUSG00000085887	Arhgap27os3	-1.00369	3.36756	12.6773	0.000370119	0.00122132
ENSMUSG00000099708	Gm29361	-1.00349	0.833143	6.77748	0.0092315	0.021003
ENSMUSG00000107742	9530085L11Rik	-1.00342	1.70533	10.1893	0.00141258	0.00403171
ENSMUSG00000028545	Bend5	-1.00202	2.23044	12.3299	0.000445757	0.00144607
ENSMUSG00000101599	Gm20342	-1.0019	3.4174	17.9676	2.24692e-05	9.75026e-05
ENSMUSG00000087785	Gm23172	-1.00164	1.69904	9.03691	0.00264582	0.00700173
ENSMUSG00000033207	Mamdc2	9.5128	6.61418	1664.73	0	0
ENSMUSG00000029816	Gpnmb	9.36217	8.36703	321.572	6.58452e-72	1.771e-69
ENSMUSG00000039252	Lgi2	8.67095	5.0124	265.565	1.05094e-59	2.01903e-57
ENSMUSG00000018126	Baiap2l2	8.66185	7.36879	347.589	1.41937e-77	4.46739e-75
ENSMUSG00000020932	Gfap	8.58959	7.17595	296.075	2.3595e-66	5.36987e-64
ENSMUSG00000028031	Dkk2	8.31451	4.63668	558.523	1.7619e-123	1.44799e-120
ENSMUSG00000068129	Cst7	8.20367	10.6744	829.514	2.06707e-182	3.39757e-179
ENSMUSG00000022303	Dcstamp	8.12246	3.60842	560.426	6.7898e-124	5.90833e-121
ENSMUSG00000029158	Yipf7	7.47645	0.820895	99.6165	1.84956e-23	5.61818e-22
ENSMUSG00000029304	Spp1	7.38572	9.10408	306.493	1.26858e-68	3.23554e-66
ENSMUSG00000026347	Tmem163	7.17775	4.35871	464.82	4.29618e-103	2.35383e-100
ENSMUSG00000074336	Apoc4	7.05118	2.12725	56.7723	4.893e-14	7.01378e-13
ENSMUSG00000027533	Fabp5	7.04494	6.76112	461.748	2.00209e-102	1.05775e-99
ENSMUSG00000028238	Atp6v0d2	6.99504	3.91726	447.013	3.22203e-99	1.48948e-96
ENSMUSG00000030329	Pianp	6.94764	6.06281	543.955	2.59978e-120	1.67211e-117
ENSMUSG00000070803	Cited4	6.79137	3.3252	154.729	1.60518e-35	9.85287e-34
ENSMUSG00000028773	Fabp3	6.78722	4.88945	330.884	6.1701e-74	1.75528e-71
ENSMUSG00000070858	Gm1673	6.69294	5.43599	231.24	3.19797e-52	4.68391e-50
ENSMUSG00000030523	Trpm1	6.59981	4.35169	606.117	7.82161e-134	7.23157e-131
ENSMUSG00000020218	Wif1	6.40062	0.880301	72.5205	1.65307e-17	3.26051e-16
ENSMUSG00000024245	Tmem178	6.11785	2.67864	187.344	1.20793e-42	1.1679e-40
ENSMUSG00000104000	Gm38335	6.10949	0.185537	48.8711	2.73344e-12	3.26358e-11
ENSMUSG00000036853	Mcoln3	6.0781	1.39563	92.7738	5.86253e-22	1.63016e-20
ENSMUSG00000031382	Asb11	6.06091	1.3805	123.411	1.13372e-28	4.71099e-27
ENSMUSG00000079049	Serpinb1c	6.01631	0.516242	79.8428	4.05423e-19	9.21263e-18
ENSMUSG00000030785	Cox6a2	5.9532	5.98263	330.208	8.66148e-74	2.41753e-71
ENSMUSG00000044258	Ctla2a	5.95319	2.29431	65.7956	5.00194e-16	8.58396e-15
ENSMUSG00000056367	Actr3b	5.85001	4.7605	294.668	4.77961e-66	1.05529e-63
ENSMUSG00000026475	Rgs16	5.84866	3.23524	184.7	4.56308e-42	4.21885e-40
ENSMUSG00000035273	Hpse	5.79148	5.66203	201.834	8.31123e-46	9.24422e-44
ENSMUSG00000007877	Tcap	5.78076	3.49693	448.245	1.73784e-99	8.29287e-97
ENSMUSG00000050370	Ch25h	5.68375	5.813	305.402	2.19211e-68	5.40464e-66
ENSMUSG00000020053	Igf1	5.53141	7.41529	923.88	6.31872e-203	1.86946e-199
ENSMUSG00000074280	Gm6166	5.4555	-0.37929	41.9463	9.38154e-11	9.25824e-10
ENSMUSG00000015568	Lpl	5.43712	8.77333	980.134	3.73601e-215	1.38167e-211
ENSMUSG00000058934	Igf1os	5.38714	1.64988	116.548	3.60586e-27	1.35729e-25
ENSMUSG00000036760	Kcnk9	5.37575	4.20009	263.873	2.45592e-59	4.65776e-57
ENSMUSG00000035105	Egln3	5.34078	5.16206	754.421	4.3859e-166	4.99082e-163
ENSMUSG00000030789	Itgax	5.32055	9.05419	792.503	2.30141e-174	3.40448e-171
ENSMUSG00000024669	Cd5	5.23426	3.18752	230.972	3.65941e-52	5.30723e-50
ENSMUSG00000097558	Gm26902	5.2217	2.24115	154.587	1.72367e-35	1.05364e-33
ENSMUSG00000099696	2900052N01Rik	5.20446	2.53374	124.198	7.62469e-29	3.21345e-27
ENSMUSG00000032911	Cspg4	5.19618	5.28283	212.152	4.65962e-48	5.8415e-46
ENSMUSG00000024529	Lox	5.15143	4.89167	545.722	1.07288e-120	7.21413e-118
ENSMUSG00000072812	Ahnak2	5.08491	2.41092	156.064	8.19568e-36	5.13723e-34
ENSMUSG00000004552	Ctse	5.04743	4.5193	310.473	1.72268e-69	4.4708e-67
ENSMUSG00000052688	Rab7b	5.0311	5.54706	761.553	1.23428e-167	1.65988e-164
ENSMUSG00000045903	Npas4	4.94965	0.730752	47.5914	5.24981e-12	6.02019e-11
ENSMUSG00000084932	Gm15156	4.90687	2.58583	98.7727	2.83216e-23	8.49821e-22
ENSMUSG00000036617	Etl4	4.88339	5.41717	304.006	4.41615e-68	1.07095e-65
ENSMUSG00000042622	Maff	4.82318	3.81931	126.421	2.48744e-29	1.07593e-27
ENSMUSG00000060843	Ctnna3	4.74796	2.09178	45.8085	1.30394e-11	1.43201e-10
ENSMUSG00000032532	Cck	4.74267	2.9898	218.343	2.07931e-49	2.67472e-47
ENSMUSG00000066705	Fxyd6	4.69973	2.3206	178.194	1.20175e-40	9.87637e-39
ENSMUSG00000079293	Clec7a	4.6608	8.60663	1021.15	4.53762e-224	3.35625e-220
ENSMUSG00000014599	Csf1	4.63193	8.24791	842.037	3.9158e-185	7.2408e-182
ENSMUSG00000027748	Trpc4	4.62545	1.68111	60.6261	6.90146e-15	1.06126e-13
ENSMUSG00000040907	Atp1a3	4.59317	7.51921	922.04	1.587e-202	3.91276e-199
ENSMUSG00000062082	Cd200r4	4.54222	4.35794	436.1	7.64424e-97	3.4267e-94
ENSMUSG00000074657	Kif5a	4.50843	5.48393	111.263	5.18205e-26	1.82519e-24
ENSMUSG00000030103	Bhlhe40	4.43779	5.48158	335.326	6.64871e-75	2.00723e-72
ENSMUSG00000033350	Chst2	4.40741	6.51127	1005.33	1.24793e-220	6.15356e-217
ENSMUSG00000002985	Apoe	4.38757	13.8787	384.522	1.28969e-85	4.76961e-83
ENSMUSG00000067577	A430093F15Rik	4.38174	2.2539	127.78	1.25372e-29	5.47088e-28
ENSMUSG00000033208	S100b	4.35537	2.92533	87.9413	6.74257e-21	1.75295e-19
ENSMUSG00000032093	Cd3e	4.34534	-0.0300141	33.2651	8.04124e-09	6.25745e-08
ENSMUSG00000079017	Ifi27l2a	4.33091	6.10482	218.822	1.63453e-49	2.12102e-47
ENSMUSG00000026185	Igfbp5	4.32037	3.48565	269.214	1.68391e-60	3.27765e-58
ENSMUSG00000053279	Aldh1a1	4.31055	2.78846	89.8041	2.62949e-21	7.034e-20
ENSMUSG00000022265	Ank	4.27202	9.20263	851.267	3.85568e-187	8.14816e-184
ENSMUSG00000025854	Fam20c	4.18602	6.76075	757.355	1.00989e-166	1.24495e-163
ENSMUSG00000053977	Cd8a	4.17443	0.528633	49.2764	2.22322e-12	2.68913e-11
ENSMUSG00000057337	Chst3	4.16691	2.56815	71.9456	2.2121e-17	4.31709e-16
ENSMUSG00000002602	Axl	4.12725	8.76052	735.078	7.04814e-162	7.44737e-159
ENSMUSG00000030361	Klrb1a	4.04644	0.319544	38.4513	5.61362e-10	5.04509e-09
ENSMUSG00000039313	AF529169	4.02172	4.80753	402.253	1.78071e-89	7.31724e-87
ENSMUSG00000059213	Ddn	3.97796	1.5288	39.3114	3.61324e-10	3.32198e-09
ENSMUSG00000035258	Abi3bp	3.94557	1.60998	43.5655	4.09994e-11	4.23241e-10
ENSMUSG00000015709	Arnt2	3.93854	4.56216	385.687	7.19171e-86	2.72787e-83
ENSMUSG00000026285	Pdcd1	3.93119	5.39817	226.073	4.28254e-51	5.86588e-49
ENSMUSG00000017400	Stac2	3.92584	1.09802	59.522	1.20934e-14	1.82362e-13
ENSMUSG00000102882	Gm2065	3.90644	0.344449	42.3131	7.77698e-11	7.74713e-10
ENSMUSG00000063060	Sox7	3.86592	1.75061	87.6329	7.88042e-21	2.02739e-19
ENSMUSG00000076934	Iglv1	3.86577	-0.697075	9.37101	0.00220445	0.00595277
ENSMUSG00000028358	Zfp618	3.85665	0.536789	44.3439	2.75463e-11	2.89618e-10
ENSMUSG00000020658	Efr3b	3.84377	4.76091	227.364	2.23932e-51	3.15488e-49
ENSMUSG00000050390	C77080	3.82771	2.8888	117.248	2.53375e-27	9.66026e-26
ENSMUSG00000086109	Gm13391	3.81109	3.57811	170.455	5.88648e-39	4.37582e-37
ENSMUSG00000024598	Fbn2	3.79673	1.05464	24.8241	6.28084e-07	3.63792e-06
ENSMUSG00000026640	Plxna2	3.79334	2.60799	123.029	1.37431e-28	5.6788e-27
ENSMUSG00000021508	Cxcl14	3.78049	4.01128	110.28	8.51006e-26	2.9621e-24
ENSMUSG00000068758	Il3ra	3.75597	5.64644	333.43	1.72081e-74	5.0912e-72
ENSMUSG00000056737	Capg	3.71735	7.36712	401.932	2.0914e-89	8.36166e-87
ENSMUSG00000048376	F2r	3.70713	1.42502	62.7312	2.36938e-15	3.8181e-14
ENSMUSG00000029189	Sel1l3	3.6338	1.73262	56.2814	6.28081e-14	8.82355e-13
ENSMUSG00000033066	Gas7	3.63036	5.53249	456.38	2.94851e-101	1.45391e-98
ENSMUSG00000068099	1500009C09Rik	3.62348	1.55959	28.7959	8.04231e-08	5.38813e-07
ENSMUSG00000115138	AC130671.1	3.6232	0.0680142	19.7082	9.02109e-06	4.26219e-05
ENSMUSG00000100157	2310034O05Rik	3.60348	0.617218	49.9888	1.54624e-12	1.89822e-11
ENSMUSG00000025586	Cpeb1	3.583	3.61144	182.311	1.51666e-41	1.34347e-39
ENSMUSG00000013523	Bcas1	3.58153	1.9257	69.337	8.29984e-17	1.54634e-15
ENSMUSG00000020532	Acaca	3.58059	6.02932	493.539	2.42032e-109	1.49183e-106
ENSMUSG00000053044	Cd8b1	3.57751	-0.34527	25.6157	4.16637e-07	2.48421e-06
ENSMUSG00000041670	Rims1	3.57664	0.818499	16.3778	5.18881e-05	0.000207196
ENSMUSG00000032220	Myo1e	3.56882	7.29604	644.84	2.96022e-142	2.91937e-139
ENSMUSG00000045502	Hcar2	3.55614	5.78641	162.456	3.28824e-37	2.27304e-35
ENSMUSG00000041801	Phlda3	3.55335	2.27532	99.3768	2.08749e-23	6.31496e-22
ENSMUSG00000048058	Ldlrad3	3.54881	3.50202	186.175	2.17391e-42	2.06145e-40
ENSMUSG00000000359	Rem1	3.53422	-0.229507	22.8298	1.77003e-06	9.57017e-06
ENSMUSG00000011154	Cfap161	3.52883	0.519976	22.1005	2.5874e-06	1.35136e-05
ENSMUSG00000044303	Cdkn2a	3.5278	1.53233	32.4796	1.20452e-08	9.14237e-08
ENSMUSG00000071604	Fam189a2	3.50633	3.01529	122.551	1.74874e-28	7.16596e-27
ENSMUSG00000033307	Mif	3.49494	7.57415	194.445	3.40501e-44	3.57236e-42
ENSMUSG00000024232	Bambi	3.48028	3.34288	206.452	8.16465e-47	9.66237e-45
ENSMUSG00000107091	Gm43343	3.47774	0.978566	38.2179	6.32678e-10	5.64828e-09
ENSMUSG00000050335	Lgals3	3.44669	5.75437	350.858	2.7563e-78	8.8639e-76
ENSMUSG00000034656	Cacna1a	3.44618	6.3263	325.768	8.02557e-73	2.19856e-70
ENSMUSG00000041120	Nbl1	3.44201	5.60482	473.301	6.12932e-105	3.48735e-102
ENSMUSG00000040276	Pacsin1	3.42007	4.88671	370.84	1.22805e-82	4.22477e-80
ENSMUSG00000034353	Ramp1	3.41958	7.0013	262.675	4.48221e-59	8.39308e-57
ENSMUSG00000028278	Rragd	3.37787	3.87273	199.036	3.3903e-45	3.74274e-43
ENSMUSG00000036585	Fgf1	3.36939	4.20785	186.529	1.81933e-42	1.73634e-40
ENSMUSG00000030657	Xylt1	3.36861	5.31103	380.007	1.24006e-84	4.47421e-82
ENSMUSG00000049526	Tmem202	3.3561	0.972336	39.1741	3.87647e-10	3.54856e-09
ENSMUSG00000000682	Cd52	3.35463	7.91375	243.895	5.56487e-55	9.1468e-53
ENSMUSG00000000982	Ccl3	3.35302	8.70988	145.227	1.91543e-33	1.01559e-31
ENSMUSG00000049265	Kcnk3	3.30086	0.732955	32.0331	1.51566e-08	1.13181e-07
ENSMUSG00000038319	Kcnh2	3.29808	3.39301	83.6003	6.05635e-20	1.46392e-18
ENSMUSG00000067279	Ppp1r3c	3.29214	2.0169	37.6004	8.68276e-10	7.5823e-09
ENSMUSG00000085111	Ascl4	3.27725	0.236313	35.4602	2.60309e-09	2.13338e-08
ENSMUSG00000066687	Zbtb16	3.27096	2.07966	39.8669	2.71866e-10	2.54056e-09
ENSMUSG00000026437	Cdk18	3.2617	4.40811	402.723	1.40632e-89	5.94391e-87
ENSMUSG00000031340	Gabre	3.26016	0.684459	29.8519	4.66328e-08	3.26165e-07
ENSMUSG00000018927	Ccl6	3.25808	9.08004	293.65	7.96621e-66	1.733e-63
ENSMUSG00000036067	Slc2a6	3.25119	4.5212	208.535	2.8671e-47	3.44821e-45
ENSMUSG00000106706	C530043K16Rik	3.23433	2.08456	52.0903	5.30063e-13	6.75967e-12
ENSMUSG00000072680	Tmem254c	3.23151	0.671987	24.7492	6.52972e-07	3.77026e-06
ENSMUSG00000042429	Adora1	3.22584	2.96805	104.669	1.44378e-24	4.68374e-23
ENSMUSG00000053025	Sv2b	3.22417	0.171393	32.1781	1.40669e-08	1.05738e-07
ENSMUSG00000037679	Inf2	3.20306	4.94131	298.474	7.08366e-67	1.66331e-64
ENSMUSG00000037852	Cpe	3.19768	5.60598	67.7062	1.89766e-16	3.42761e-15
ENSMUSG00000076441	Ass1	3.18666	1.67768	34.978	3.33444e-09	2.69838e-08
ENSMUSG00000011008	Mcoln2	3.1812	0.067932	23.7956	1.07126e-06	5.98912e-06
ENSMUSG00000044770	Scml4	3.17396	0.743387	44.7149	2.27911e-11	2.42902e-10
ENSMUSG00000033467	Crlf2	3.17354	8.63977	177.401	1.78982e-40	1.44682e-38
ENSMUSG00000051022	Hs3st1	3.17008	2.54711	81.7028	1.58167e-19	3.70217e-18
ENSMUSG00000041552	Ptchd1	3.1679	4.02472	286.745	2.54553e-64	5.37944e-62
ENSMUSG00000086067	Gm16183	3.16734	0.0965639	24.8202	6.29337e-07	3.64375e-06
ENSMUSG00000032231	Anxa2	3.16385	5.46926	347.435	1.53351e-77	4.72607e-75
ENSMUSG00000006800	Sulf2	3.14048	6.34358	397.621	1.81451e-88	7.06371e-86
ENSMUSG00000024640	Psat1	3.12621	7.10735	548.544	2.61036e-121	1.83881e-118
ENSMUSG00000111897	Gm19810	3.11112	1.13536	42.5771	6.79518e-11	6.80115e-10
ENSMUSG00000003418	St8sia6	3.11069	6.13995	479.883	2.26611e-106	1.3409e-103
ENSMUSG00000055865	Fam19a3	3.10208	1.31454	35.7709	2.21942e-09	1.83213e-08
ENSMUSG00000049556	Lingo1	3.09578	0.947662	36.9595	1.20609e-09	1.0331e-08
ENSMUSG00000042388	Dlgap3	3.09281	1.19509	24.1671	8.83294e-07	4.99678e-06
ENSMUSG00000040616	Tmem51	3.08673	2.76035	68.3839	1.34569e-16	2.46371e-15
ENSMUSG00000020205	Phlda1	3.07811	1.44696	40.2235	2.26504e-10	2.13309e-09
ENSMUSG00000086040	Wipf3	3.07576	2.73294	69.8458	6.4125e-17	1.20534e-15
ENSMUSG00000034993	Vat1	3.06979	6.49199	555.713	7.19683e-123	5.32313e-120
ENSMUSG00000079298	Klrb1b	3.05135	2.65354	92.794	5.80313e-22	1.61668e-20
ENSMUSG00000027698	Nceh1	3.04327	6.42106	556.87	4.03254e-123	3.13965e-120
ENSMUSG00000040883	Tmem205	3.03829	4.13196	141.277	1.39966e-32	7.06662e-31
ENSMUSG00000039942	Ptger4	3.03675	3.96506	198.586	4.25041e-45	4.65751e-43
ENSMUSG00000104654	Gm43814	3.03282	-0.135794	23.3957	1.31875e-06	7.28194e-06
ENSMUSG00000026012	Cd28	3.03072	2.61987	51.5088	7.12758e-13	8.99644e-12
ENSMUSG00000033880	Lgals3bp	3.01185	9.72946	367.503	6.54455e-82	2.20031e-79
ENSMUSG00000032011	Thy1	3.00268	2.00222	71.0035	3.56588e-17	6.84178e-16
ENSMUSG00000037600	Kdf1	2.99019	-0.0122333	20.496	5.97564e-06	2.92998e-05
ENSMUSG00000002228	Ppm1j	2.97442	2.35236	98.0743	4.02971e-23	1.19943e-21
ENSMUSG00000040711	Sh3pxd2b	2.97056	4.98473	184.569	4.8735e-42	4.47787e-40
ENSMUSG00000024727	Trpm6	2.95567	0.892193	13.0747	0.000299308	0.00100927
ENSMUSG00000011148	Adssl1	2.94213	6.52736	305.964	1.65404e-68	4.14716e-66
ENSMUSG00000018930	Ccl4	2.93365	7.87364	154.876	1.49021e-35	9.22369e-34
ENSMUSG00000028362	Tnfsf8	2.92043	4.586	250.799	1.73903e-56	3.09945e-54
ENSMUSG00000094152	Slc6a16	2.92036	0.13983	12.8342	0.000340344	0.00113165
ENSMUSG00000006360	Crip1	2.91858	4.94321	169.664	8.76002e-39	6.4152e-37
ENSMUSG00000097365	C030034L19Rik	2.91441	2.74046	83.7115	5.72516e-20	1.38612e-18
ENSMUSG00000074802	Gas2l3	2.91322	4.29619	245.626	2.33371e-55	3.95468e-53
ENSMUSG00000044548	Dact1	2.9027	2.78909	113.058	2.09529e-26	7.5415e-25
ENSMUSG00000031995	St14	2.89311	7.19729	460.245	4.25285e-102	2.16939e-99
ENSMUSG00000049723	Mmp12	2.88687	2.71359	83.1643	7.55078e-20	1.80742e-18
ENSMUSG00000022246	Rai14	2.88302	3.97403	190.826	2.0986e-43	2.15588e-41
ENSMUSG00000016427	Ndufa1	2.87079	5.56622	117.151	2.65972e-27	1.01144e-25
ENSMUSG00000078300	Gm2606	2.86871	0.0805174	29.7518	4.91062e-08	3.41206e-07
ENSMUSG00000021091	Serpina3n	2.86237	0.225172	11.3645	0.000748613	0.00228901
ENSMUSG00000069792	Wfdc17	2.86197	4.88497	137.498	9.38431e-32	4.58159e-30
ENSMUSG00000030325	Klrb1c	2.85886	1.17178	34.4929	4.27799e-09	3.43004e-08
ENSMUSG00000114961	A930002C04Rik	2.85575	-0.024039	17.2367	3.29998e-05	0.00013892
ENSMUSG00000051611	Olfr112	2.85436	0.235116	20.2324	6.85817e-06	3.32088e-05
ENSMUSG00000085939	Cd63-ps	2.85225	5.79813	243.813	5.79773e-55	9.42482e-53
ENSMUSG00000060550	H2-Q7	2.85023	4.94713	227.03	2.64932e-51	3.6973e-49
ENSMUSG00000068606	Gm4841	2.84975	0.60562	25.3041	4.89667e-07	2.89167e-06
ENSMUSG00000020395	Itk	2.84524	-0.203857	12.544	0.000397481	0.00130174
ENSMUSG00000097649	Gm10561	2.8423	0.334351	16.1509	5.84905e-05	0.000230733
ENSMUSG00000087006	Gm13889	2.83413	5.34382	116.91	3.00368e-27	1.13641e-25
ENSMUSG00000038204	Asb10	2.8288	5.86017	355.438	2.77324e-79	9.11656e-77
ENSMUSG00000066861	Oas1g	2.82852	2.69981	119.596	7.75356e-28	3.05863e-26
ENSMUSG00000111942	Gm5182	2.8269	2.87665	80.087	3.58287e-19	8.19186e-18
ENSMUSG00000029608	Rph3a	2.81469	0.670105	17.1669	3.42349e-05	0.00014367
ENSMUSG00000046223	Plaur	2.81324	6.09005	181.785	1.97604e-41	1.70945e-39
ENSMUSG00000026866	Kynu	2.81023	2.63672	77.8086	1.13523e-18	2.47692e-17
ENSMUSG00000067149	Jchain	2.80548	0.825824	10.5043	0.001191	0.0034682
ENSMUSG00000028626	Col9a2	2.80435	1.73662	46.7174	8.19997e-12	9.2245e-11
ENSMUSG00000104621	Gm43185	2.78693	-0.119367	18.1703	2.02003e-05	8.84617e-05
ENSMUSG00000025351	Cd63	2.77344	9.34049	242.659	1.03491e-54	1.66407e-52
ENSMUSG00000102599	Gm38386	2.77218	1.54972	65.5988	5.52717e-16	9.41975e-15
ENSMUSG00000048965	Mrgpre	2.76639	4.72352	294.973	4.1026e-66	9.19541e-64
ENSMUSG00000028716	Pdzk1ip1	2.76334	1.30453	35.959	2.01516e-09	1.67473e-08
ENSMUSG00000039616	Mocos	2.75507	1.99926	60.8233	6.24344e-15	9.69141e-14
ENSMUSG00000036103	Colec12	2.73968	3.98134	83.1485	7.6116e-20	1.81904e-18
ENSMUSG00000041957	Pkp2	2.73574	0.295379	17.2854	3.21654e-05	0.000135639
ENSMUSG00000002033	Cd3g	2.72859	-0.0413813	16.6105	4.58955e-05	0.000185958
ENSMUSG00000039316	Rftn1	2.72537	5.73073	315.464	1.40882e-70	3.72155e-68
ENSMUSG00000015843	Rxrg	2.72341	3.23661	106.458	5.85335e-25	1.94145e-23
ENSMUSG00000050105	Grrp1	2.72205	1.34695	56.748	4.95386e-14	7.09414e-13
ENSMUSG00000104529	Rbakdn	2.72065	-0.350231	10.2413	0.00137334	0.00393107
ENSMUSG00000027712	Anxa5	2.72054	7.28151	416.16	1.67193e-92	7.27437e-90
ENSMUSG00000014602	Kif1a	2.71875	4.2532	183.37	8.90359e-42	8.03114e-40
ENSMUSG00000029641	Rasl11a	2.71852	0.440142	23.831	1.05175e-06	5.88448e-06
ENSMUSG00000064281	Rpl19-ps1	2.71845	-0.608041	11.5534	0.000676244	0.00209063
ENSMUSG00000025492	Ifitm3	2.71249	6.19906	149.367	2.38377e-34	1.37746e-32
ENSMUSG00000028527	Ak4	2.70464	1.47321	29.6381	5.20701e-08	3.60615e-07
ENSMUSG00000050967	Creg2	2.70329	1.02852	41.0621	1.47469e-10	1.41381e-09
ENSMUSG00000029648	Flt1	2.70055	5.68706	83.8922	5.22509e-20	1.26908e-18
ENSMUSG00000095524	Gm15682	2.68716	2.0704	56.4005	5.91144e-14	8.34393e-13
ENSMUSG00000030579	Tyrobp	2.68524	10.8626	161.851	4.45866e-37	3.05356e-35
ENSMUSG00000045045	Lrfn4	2.68451	2.46031	63.5927	1.52998e-15	2.51477e-14
ENSMUSG00000033316	Galnt9	2.68372	0.981984	36.0731	1.90052e-09	1.5857e-08
ENSMUSG00000089651	Gm16353	2.68254	0.328181	21.4485	3.63454e-06	1.84953e-05
ENSMUSG00000020098	Pcbd1	2.67381	-0.168945	14.9339	0.000111344	0.000413742
ENSMUSG00000032193	Ldlr	2.66318	4.88199	197.979	5.76672e-45	6.27258e-43
ENSMUSG00000068240	Gm11808	2.65818	6.87965	180.234	4.30828e-41	3.64185e-39
ENSMUSG00000116757		2.65443	3.69587	44.7869	2.1969e-11	2.34818e-10
ENSMUSG00000052013	Btla	2.65224	2.66387	56.1082	6.85892e-14	9.59924e-13
ENSMUSG00000028459	Cd72	2.65222	5.17595	282.092	2.62829e-63	5.47609e-61
ENSMUSG00000028121	Bcar3	2.65166	2.96984	98.0701	4.03832e-23	1.19958e-21
ENSMUSG00000009687	Fxyd5	2.6379	5.50643	205.517	1.30595e-46	1.52118e-44
ENSMUSG00000028194	Ddah1	2.63745	0.794775	20.857	4.94888e-06	2.4666e-05
ENSMUSG00000091955	Gm9844	2.6355	0.724712	24.0799	9.24195e-07	5.21221e-06
ENSMUSG00000025743	Sdc3	2.63389	8.62466	296.954	1.5183e-66	3.5094e-64
ENSMUSG00000094497	Gm8210	2.63083	-0.453062	18.7861	1.46229e-05	6.60913e-05
ENSMUSG00000023972	Ptk7	2.62761	1.02185	26.2624	2.9804e-07	1.82111e-06
ENSMUSG00000015980	Lrrc27	2.62752	2.71429	74.9863	4.73999e-18	9.88979e-17
ENSMUSG00000075702	Selenom	2.62564	3.36112	104.891	1.29061e-24	4.19604e-23
ENSMUSG00000042842	Serpinb6b	2.62432	1.50431	48.508	3.28952e-12	3.87127e-11
ENSMUSG00000104913	Gm6560	2.62347	3.08525	141.315	1.37328e-32	6.95717e-31
ENSMUSG00000046687	Gm5424	2.62218	1.26576	27.563	1.52058e-07	9.74182e-07
ENSMUSG00000049044	Rapgef4	2.62102	2.33331	46.0382	1.1597e-11	1.28122e-10
ENSMUSG00000015312	Gadd45b	2.61791	3.08535	60.6905	6.67916e-15	1.02922e-13
ENSMUSG00000090894	Olfr110	2.61649	3.37116	78.1782	9.41539e-19	2.08194e-17
ENSMUSG00000038523	1700003F12Rik	2.60887	3.55342	42.9985	5.47806e-11	5.56191e-10
ENSMUSG00000023456	Tpi1	2.60763	8.01469	207.353	5.19235e-47	6.19438e-45
ENSMUSG00000105814	Mir703	2.59604	0.180392	18.5005	1.69856e-05	7.5592e-05
ENSMUSG00000052776	Oas1a	2.58633	4.60892	164.649	1.0912e-37	7.68673e-36
ENSMUSG00000044609	Gm9294	2.57751	0.224896	14.7825	0.00012065	0.000444861
ENSMUSG00000026558	Uck2	2.5739	2.10344	55.1167	1.13579e-13	1.55141e-12
ENSMUSG00000039264	Gimap3	2.56501	1.5575	44.7477	2.24133e-11	2.3922e-10
ENSMUSG00000018924	Alox15	2.56256	-0.226886	16.5595	4.71476e-05	0.000190198
ENSMUSG00000021886	Gpr65	2.56208	4.90161	272.321	3.54032e-61	7.0773e-59
ENSMUSG00000111118	Gm6545	2.55496	0.191042	22.6195	1.97475e-06	1.05346e-05
ENSMUSG00000066180	Gm10155	2.55248	1.98024	49.261	2.24076e-12	2.70813e-11
ENSMUSG00000055737	Ghr	2.55097	1.85489	45.837	1.28512e-11	1.41344e-10
ENSMUSG00000045382	Cxcr4	2.53853	4.75517	90.0553	2.3159e-21	6.21763e-20
ENSMUSG00000106755	Tpi-rs11	2.53726	1.08989	29.1005	6.87206e-08	4.65895e-07
ENSMUSG00000025978	Rftn2	2.53063	2.18872	74.0284	7.69993e-18	1.57763e-16
ENSMUSG00000105879	Gm6204	2.53044	0.641644	24.2075	8.64962e-07	4.90375e-06
ENSMUSG00000073409	H2-Q6	2.53039	5.85473	146.383	1.0704e-33	5.8646e-32
ENSMUSG00000038776	Ephx1	2.52857	6.74407	377.733	3.87685e-84	1.36548e-81
ENSMUSG00000069939	Gm12070	2.52798	2.81217	105.364	1.01656e-24	3.31964e-23
ENSMUSG00000028037	Ifi44	2.52686	1.15898	30.5261	3.29404e-08	2.34611e-07
ENSMUSG00000113198	Gm6988	2.52257	0.563276	26.9744	2.0617e-07	1.29232e-06
ENSMUSG00000076490	Trbc1	2.51954	0.0593356	22.7424	1.85235e-06	9.96793e-06
ENSMUSG00000107176	Gm9794	2.51488	7.74811	211.592	6.17379e-48	7.67469e-46
ENSMUSG00000069188	Gm13192	2.50747	1.27594	40.41	2.05887e-10	1.94364e-09
ENSMUSG00000081251	Gm12164	2.50631	0.479273	28.4088	9.82192e-08	6.48352e-07
ENSMUSG00000085006	BC021767	2.50589	-0.306095	13.5636	0.000230615	0.000799503
ENSMUSG00000022636	Alcam	2.50085	3.49778	113.792	1.44713e-26	5.2598e-25
ENSMUSG00000067063	Gm6990	2.4997	0.114419	20.7665	5.1883e-06	2.57552e-05
ENSMUSG00000034591	Slc41a2	2.4989	1.17007	27.2024	1.83233e-07	1.15589e-06
ENSMUSG00000003363	Pld3	2.49689	9.32582	279.225	1.10779e-62	2.24486e-60
ENSMUSG00000096617	Gm5559	2.49585	4.4509	147.839	5.1451e-34	2.89397e-32
ENSMUSG00000041736	Tspo	2.49422	6.50073	191.61	1.41546e-43	1.46426e-41
ENSMUSG00000039103	Nexn	2.4937	3.25561	129.123	6.37421e-30	2.84875e-28
ENSMUSG00000047798	Cd300lf	2.48931	4.22253	117.14	2.67441e-27	1.01442e-25
ENSMUSG00000093674	Rpl41	2.48854	9.50882	126.908	1.94592e-29	8.46648e-28
ENSMUSG00000040564	Apoc1	2.48428	1.01557	21.2183	4.09842e-06	2.06358e-05
ENSMUSG00000069516	Lyz2	2.48213	10.5941	242.31	1.23333e-54	1.92236e-52
ENSMUSG00000031996	Aplp2	2.46958	8.48711	330.952	5.96169e-74	1.72924e-71
ENSMUSG00000099974	Bcl2a1d	2.46105	3.66961	112.945	2.21895e-26	7.9672e-25
ENSMUSG00000083596	Rpl21-ps15	2.45702	7.15145	204.713	1.95652e-46	2.26115e-44
ENSMUSG00000036894	Rap2b	2.44903	4.84434	184.059	6.29796e-42	5.75097e-40
ENSMUSG00000057841	Rpl32	2.44752	8.86611	219.172	1.37083e-49	1.79457e-47
ENSMUSG00000110057	Gm2225	2.44456	1.40122	37.0185	1.17014e-09	1.00522e-08
ENSMUSG00000031137	Fgf13	2.43997	4.06649	189.95	3.25962e-43	3.28024e-41
ENSMUSG00000039007	Cpq	2.42723	5.05469	303.137	6.82797e-68	1.62913e-65
ENSMUSG00000022296	Baalc	2.42615	1.26365	22.0803	2.61483e-06	1.36285e-05
ENSMUSG00000007891	Ctsd	2.42472	13.872	167.801	2.23548e-38	1.61315e-36
ENSMUSG00000024610	Cd74	2.42365	10.1178	171.812	2.97491e-39	2.2453e-37
ENSMUSG00000005054	Cstb	2.42113	6.02774	145.639	1.55664e-33	8.34325e-32
ENSMUSG00000031266	Gla	2.42076	4.40826	143.589	4.36873e-33	2.25967e-31
ENSMUSG00000060568	Fam78b	2.41912	0.769855	37.6714	8.37236e-10	7.32854e-09
ENSMUSG00000067288	Rps28	2.41228	7.83308	152.843	4.14489e-35	2.4824e-33
ENSMUSG00000071303	Rps8-ps1	2.41004	0.498174	28.088	1.15923e-07	7.54516e-07
ENSMUSG00000005220	Corin	2.40998	0.642451	19.0186	1.29453e-05	5.91232e-05
ENSMUSG00000106743	Gm42847	2.40873	0.0764526	20.8927	4.85751e-06	2.42351e-05
ENSMUSG00000030701	Plekhb1	2.40835	3.55206	54.7093	1.39742e-13	1.8827e-12
ENSMUSG00000044550	Tceal3	2.40661	-0.126851	13.1455	0.000288205	0.000974942
ENSMUSG00000029561	Oasl2	2.4051	5.38417	176.566	2.72473e-40	2.17875e-38
ENSMUSG00000071415	Rpl23	2.40442	8.78569	194.73	2.95016e-44	3.11726e-42
ENSMUSG00000022887	Masp1	2.40431	5.1296	247.725	8.13646e-56	1.41603e-53
ENSMUSG00000097654	Gm26714	2.40312	2.73279	58.6648	1.86961e-14	2.75195e-13
ENSMUSG00000027230	Creb3l1	2.40195	2.4554	50.3022	1.31804e-12	1.63572e-11
ENSMUSG00000072940	Gm10443	2.40184	4.75778	180.03	4.77429e-41	4.01284e-39
ENSMUSG00000113113	Gm2614	2.4016	1.18062	32.5387	1.16841e-08	8.88199e-08
ENSMUSG00000082193	Rpl5-ps1	2.40023	0.00330249	21.5959	3.36562e-06	1.72216e-05
ENSMUSG00000026072	Il1r1	2.39435	3.17505	95.0216	1.88319e-22	5.37799e-21
ENSMUSG00000061848	Gm5805	2.39156	2.55455	90.7544	1.62659e-21	4.40699e-20
ENSMUSG00000033249	Hsf4	2.38533	1.61884	45.3707	1.63059e-11	1.76713e-10
ENSMUSG00000074607	Tox2	2.37503	2.02988	53.3265	2.82473e-13	3.67836e-12
ENSMUSG00000030107	Usp18	2.37231	4.04336	152.431	5.1003e-35	3.03007e-33
ENSMUSG00000080921	Rpl38-ps2	2.37188	4.86173	154	2.31594e-35	1.40409e-33
ENSMUSG00000026435	Slc45a3	2.36614	1.43279	21.7194	3.15582e-06	1.62379e-05
ENSMUSG00000105388	Rpl36a-ps2	2.35556	4.51011	144.386	2.92585e-33	1.52402e-31
ENSMUSG00000041453	Rpl21	2.35445	8.31325	121.042	3.74197e-28	1.50421e-26
ENSMUSG00000028327	Stra6l	2.35359	1.07776	21.1503	4.24632e-06	2.13441e-05
ENSMUSG00000096971	4930556M19Rik	2.3535	1.47195	40.4285	2.03942e-10	1.92774e-09
ENSMUSG00000059461	Gm7331	2.3518	3.23262	99.0623	2.44681e-23	7.35683e-22
ENSMUSG00000037071	Scd1	2.34895	3.36148	31.5175	1.97646e-08	1.45012e-07
ENSMUSG00000026080	Chst10	2.34888	3.80974	140.388	2.18925e-32	1.09411e-30
ENSMUSG00000117239		2.34522	0.338269	25.6716	4.04732e-07	2.41517e-06
ENSMUSG00000024164	C3	2.34293	4.09914	73.923	8.12238e-18	1.6573e-16
ENSMUSG00000073411	H2-D1	2.34145	10.6375	238.399	8.78489e-54	1.33974e-51
ENSMUSG00000083328	Gm11826	2.34131	-0.62071	10.3006	0.0013299	0.00382453
ENSMUSG00000080848	Gm9385	2.33528	1.88213	46.7516	8.05772e-12	9.07828e-11
ENSMUSG00000066487	Gm5786	2.33526	1.01256	22.9661	1.6488e-06	8.98366e-06
ENSMUSG00000096842	Gm10736	2.33241	2.2778	31.2656	2.25035e-08	1.63665e-07
ENSMUSG00000057657	Rps18-ps3	2.33013	0.745855	33.175	8.42259e-09	6.51991e-08
ENSMUSG00000032294	Pkm	2.32499	9.51925	269.85	1.22346e-60	2.41315e-58
ENSMUSG00000026958	Dpp7	2.32228	7.24108	259.097	2.69993e-58	4.9925e-56
ENSMUSG00000061684	Rpl21-ps8	2.31915	3.31608	84.4186	4.00359e-20	9.75702e-19
ENSMUSG00000060143	Gm10076	2.3191	5.27933	39.2816	3.66888e-10	3.36477e-09
ENSMUSG00000052565	Hist1h1d	2.31861	2.71513	38.249	6.22684e-10	5.57251e-09
ENSMUSG00000025289	Prdx4	2.31577	6.1571	158.56	2.33465e-36	1.50159e-34
ENSMUSG00000024661	Fth1	2.31249	11.1985	167.899	2.12824e-38	1.54329e-36
ENSMUSG00000079435	Rpl36a	2.31182	7.61451	181.27	2.55949e-41	2.20131e-39
ENSMUSG00000056888	Glipr1	2.30848	4.19261	177.831	1.44182e-40	1.17839e-38
ENSMUSG00000041841	Rpl37	2.30795	8.27432	163.211	2.24956e-37	1.5697e-35
ENSMUSG00000031146	Plp2	2.30645	2.55126	72.9822	1.30826e-17	2.60823e-16
ENSMUSG00000112895	Gm47567	2.30097	0.416609	18.1791	2.01072e-05	8.80799e-05
ENSMUSG00000058546	Rpl23a	2.297	7.89549	171.324	3.80118e-39	2.85436e-37
ENSMUSG00000020027	Socs2	2.29698	2.12772	37.1032	1.1204e-09	9.64729e-09
ENSMUSG00000059159	Gm8129	2.28912	3.25133	65.3395	6.30464e-16	1.06955e-14
ENSMUSG00000071532	Gm10335	2.28651	5.28231	188.135	8.11918e-43	7.9541e-41
ENSMUSG00000057322	Rpl38	2.28495	8.17458	134.63	3.97885e-31	1.87449e-29
ENSMUSG00000019942	Cdk1	2.28389	3.34532	92.1312	8.11173e-22	2.23458e-20
ENSMUSG00000018774	Cd68	2.28293	10.6399	135.739	2.27541e-31	1.08581e-29
ENSMUSG00000007682	Dio2	2.27856	1.4766	19.6101	9.49642e-06	4.45546e-05
ENSMUSG00000035692	Isg15	2.27741	3.29257	90.1388	2.22024e-21	5.97165e-20
ENSMUSG00000024186	Rgs11	2.27315	3.79125	89.1972	3.57352e-21	9.43985e-20
ENSMUSG00000063556	Gm10132	2.27065	3.15485	76.9388	1.76341e-18	3.78608e-17
ENSMUSG00000027523	Gnas	2.2701	6.45664	121.331	3.23346e-28	1.3069e-26
ENSMUSG00000041697	Cox6a1	2.26947	7.35998	109.529	1.24292e-25	4.29593e-24
ENSMUSG00000078636	Gm7336	2.26931	3.12237	83.0502	7.99967e-20	1.9087e-18
ENSMUSG00000030695	Aldoa	2.26883	9.72272	203.203	4.17729e-46	4.75343e-44
ENSMUSG00000068397	Gm10240	2.26737	1.27047	29.755	4.90237e-08	3.40793e-07
ENSMUSG00000049551	Fzd9	2.26687	0.862998	19.6584	9.2596e-06	4.35956e-05
ENSMUSG00000081049	Rps24-ps3	2.26589	1.78812	54.8806	1.28081e-13	1.73936e-12
ENSMUSG00000020684	Rasl10b	2.26555	1.12499	10.3609	0.00128714	0.0037153
ENSMUSG00000074516	Gm10709	2.2628	3.92012	73.7564	8.83751e-18	1.79087e-16
ENSMUSG00000006931	P3h4	2.26136	3.407	80.2435	3.31006e-19	7.57984e-18
ENSMUSG00000016256	Ctsz	2.25862	11.5964	153.29	3.31032e-35	1.99063e-33
ENSMUSG00000020262	Adarb1	2.25857	5.79578	118.413	1.40767e-27	5.4512e-26
ENSMUSG00000103865	Gm37416	2.25792	2.81683	41.8823	9.69358e-11	9.54708e-10
ENSMUSG00000045055	Rpsa-ps2	2.25618	2.6187	60.1153	8.9459e-15	1.3657e-13
ENSMUSG00000036390	Gadd45a	2.2559	2.0082	52.3214	4.71221e-13	6.0353e-12
ENSMUSG00000084093	Gm16418	2.25458	1.47295	29.6143	5.27156e-08	3.64403e-07
ENSMUSG00000095847	Gm5451	2.25329	1.15307	41.2296	1.35355e-10	1.30359e-09
ENSMUSG00000111964	Gm8942	2.24955	-0.19754	17.8492	2.39123e-05	0.000103371
ENSMUSG00000062353	Gm15772	2.24812	4.80389	190.697	2.23991e-43	2.28517e-41
ENSMUSG00000112908	Gm7392	2.24626	1.56	40.5829	1.88446e-10	1.78813e-09
ENSMUSG00000091957	Rps2-ps10	2.24462	1.69997	38.2187	6.32422e-10	5.64828e-09
ENSMUSG00000001313	Rnd2	2.24443	2.89405	44.342	2.75739e-11	2.89702e-10
ENSMUSG00000062070	Pgk1	2.24034	7.10646	257.011	7.6941e-58	1.40517e-55
ENSMUSG00000039195	1110008P14Rik	2.23862	2.84481	45.0176	1.95276e-11	2.09784e-10
ENSMUSG00000078193	Gm2000	2.23594	5.14252	141.716	1.12221e-32	5.74424e-31
ENSMUSG00000058173	Smco4	2.23552	2.23609	32.0854	1.47541e-08	1.10399e-07
ENSMUSG00000017404	Rpl19	2.23484	8.97792	182.607	1.30655e-41	1.16432e-39
ENSMUSG00000026981	Il1rn	2.22847	1.41447	24.8246	6.27914e-07	3.63792e-06
ENSMUSG00000040811	Eml2	2.22255	3.45947	128.338	9.46832e-30	4.18104e-28
ENSMUSG00000031765	Mt1	2.22162	6.74662	102.031	5.46472e-24	1.70908e-22
ENSMUSG00000057863	Rpl36	2.2178	8.08638	137.964	7.42069e-32	3.63491e-30
ENSMUSG00000068014	Gm14648	2.21515	3.02993	64.8876	7.92944e-16	1.33296e-14
ENSMUSG00000058443	Rpl10-ps3	2.21371	1.31966	37.184	1.07493e-09	9.2774e-09
ENSMUSG00000016496	Cd274	2.21346	5.37117	239.336	5.4879e-54	8.45651e-52
ENSMUSG00000046721	Rpl14-ps1	2.21057	6.69222	247.083	1.12305e-55	1.93178e-53
ENSMUSG00000111875	Gm5425	2.21023	0.426872	18.1015	2.09439e-05	9.14277e-05
ENSMUSG00000017639	Rab11fip4	2.20716	3.7949	111.46	4.6918e-26	1.66441e-24
ENSMUSG00000074796	Slc4a11	2.20464	0.173866	14.1222	0.000171307	0.000611398
ENSMUSG00000073405	H2-T-ps	2.20377	1.64185	44.4397	2.62318e-11	2.76584e-10
ENSMUSG00000033022	Cdo1	2.20182	0.865185	21.9062	2.86307e-06	1.4814e-05
ENSMUSG00000022010	Tsc22d1	2.20059	6.02595	125.427	4.10371e-29	1.7596e-27
ENSMUSG00000047965	Rpl9-ps7	2.19972	2.25618	54.4349	1.60684e-13	2.14724e-12
ENSMUSG00000040952	Rps19	2.19964	8.41139	175.033	5.88829e-40	4.63327e-38
ENSMUSG00000012848	Rps5	2.19852	9.21708	197.519	7.26557e-45	7.84523e-43
ENSMUSG00000066116	Gm10154	2.19846	3.59124	114.232	1.15927e-26	4.26595e-25
ENSMUSG00000022769	Sdf2l1	2.1965	7.53811	245.147	2.9683e-55	4.93372e-53
ENSMUSG00000058542	Gm15590	2.19435	2.40195	65.6075	5.50298e-16	9.38934e-15
ENSMUSG00000038274	Fau	2.19391	9.65211	155.186	1.27483e-35	7.92377e-34
ENSMUSG00000083773	Gm13394	2.19332	1.7777	41.0067	1.51706e-10	1.45349e-09
ENSMUSG00000037563	Rps16	2.19283	8.99119	152.094	6.0426e-35	3.57553e-33
ENSMUSG00000061983	Rps12	2.1928	8.83498	165.907	5.79747e-38	4.12317e-36
ENSMUSG00000057036	Gm7536	2.19071	6.57166	101.408	7.4867e-24	2.3316e-22
ENSMUSG00000018585	Atox1	2.19068	6.70903	119.397	8.57531e-28	3.35594e-26
ENSMUSG00000090200	1700025N21Rik	2.19001	1.52118	24.0032	9.61771e-07	5.40147e-06
ENSMUSG00000029338	Antxr2	2.18818	3.3986	121.116	3.6045e-28	1.4529e-26
ENSMUSG00000083716	Gm13436	2.18711	2.73606	62.4391	2.74806e-15	4.40434e-14
ENSMUSG00000045725	Prr15	2.18643	1.77948	30.7083	2.99879e-08	2.14823e-07
ENSMUSG00000050299	Gm9843	2.18479	5.62424	133.489	7.06852e-31	3.2882e-29
ENSMUSG00000025362	Rps26	2.18395	8.80905	148.521	3.64938e-34	2.07661e-32
ENSMUSG00000060419	Rps16-ps2	2.18382	6.06014	158.312	2.64578e-36	1.69433e-34
ENSMUSG00000081051	Gm15427	2.18022	7.03415	226.376	3.67914e-51	5.08649e-49
ENSMUSG00000062997	Rpl35	2.18019	7.43676	181.824	1.93764e-41	1.68608e-39
ENSMUSG00000063457	Rps15	2.17865	9.2361	159.819	1.23937e-36	8.14841e-35
ENSMUSG00000047676	Rpsa-ps10	2.17601	5.30542	218.293	2.13212e-49	2.71901e-47
ENSMUSG00000039278	Pcsk1n	2.17545	2.21492	34.1543	5.09101e-09	4.05117e-08
ENSMUSG00000078126	Rpl23a-ps3	2.17264	5.59014	185.627	2.86431e-42	2.69884e-40
ENSMUSG00000025508	Rplp2	2.17215	9.07875	160.448	9.03165e-37	6.04548e-35
ENSMUSG00000032715	Trib3	2.17128	0.742021	21.0488	4.47736e-06	2.24444e-05
ENSMUSG00000079523	Tmsb10	2.17028	6.32457	114.385	1.07328e-26	3.95937e-25
ENSMUSG00000073640	Rpl27-ps3	2.1672	2.03773	55.1081	1.1408e-13	1.55681e-12
ENSMUSG00000041481	Serpina3g	2.16606	-0.0267832	16.7966	4.16077e-05	0.000170783
ENSMUSG00000046330	Rpl37a	2.16538	8.99033	148.521	3.64982e-34	2.07661e-32
ENSMUSG00000040852	Plekhh2	2.16489	4.61904	144.749	2.43704e-33	1.28296e-31
ENSMUSG00000024608	Rps14	2.16398	9.59668	179.327	6.79609e-41	5.64801e-39
ENSMUSG00000032959	Pebp1	2.16203	6.63972	193.656	5.06335e-44	5.2748e-42
ENSMUSG00000038539	Atf5	2.16182	4.00925	114.992	7.89985e-27	2.93624e-25
ENSMUSG00000040528	Milr1	2.1601	5.34197	183.688	7.58882e-42	6.8872e-40
ENSMUSG00000039001	Rps21	2.15995	8.66098	128.227	1.00118e-29	4.40788e-28
ENSMUSG00000071052	Rpl7a-ps5	2.15737	4.77762	65.6745	5.31884e-16	9.09613e-15
ENSMUSG00000055413	H2-Q5	2.157	3.68669	76.9773	1.72938e-18	3.71842e-17
ENSMUSG00000066407	Gm10263	2.1569	0.673244	21.3527	3.82087e-06	1.93701e-05
ENSMUSG00000028874	Fgr	2.1563	4.81571	169.635	8.89059e-39	6.47874e-37
ENSMUSG00000055093	Gm8430	2.15504	3.55228	81.5043	1.74881e-19	4.08692e-18
ENSMUSG00000044424	Gm9493	2.15412	4.23042	96.4141	9.32021e-23	2.70872e-21
ENSMUSG00000073702	Rpl31	2.15384	8.38625	109.183	1.47937e-25	5.07757e-24
ENSMUSG00000060377	Rpl36a-ps1	2.15372	0.821763	18.2848	1.90222e-05	8.37238e-05
ENSMUSG00000067038	Rps12-ps3	2.15312	7.02609	174.265	8.66509e-40	6.74645e-38
ENSMUSG00000058905	Gm10051	2.15298	0.516689	18.8667	1.40177e-05	6.35694e-05
ENSMUSG00000094392	Gm3788	2.15257	0.772056	20.1781	7.05573e-06	3.40762e-05
ENSMUSG00000057315	Arhgap24	2.1516	4.90653	160.252	9.96943e-37	6.61335e-35
ENSMUSG00000089762	Ier5l	2.15085	1.30247	33.5182	7.06008e-09	5.5347e-08
ENSMUSG00000002233	Rhoc	2.15055	5.55572	161.529	5.24381e-37	3.54209e-35
ENSMUSG00000032518	Rpsa	2.14914	9.54011	223.527	1.53828e-50	2.06871e-48
ENSMUSG00000017724	Etv4	2.14829	2.61112	37.3765	9.73877e-10	8.45952e-09
ENSMUSG00000050538	B230217C12Rik	2.14598	1.07546	19.1914	1.18247e-05	5.43743e-05
ENSMUSG00000044080	S100a1	2.14528	4.05555	88.9447	4.06005e-21	1.06679e-19
ENSMUSG00000049517	Rps23	2.14395	9.59728	166.924	3.47487e-38	2.48327e-36
ENSMUSG00000021750	Fam107a	2.14155	3.55799	33.0242	9.10197e-09	7.0201e-08
ENSMUSG00000008668	Rps18	2.13922	9.0526	172.474	2.13269e-39	1.63466e-37
ENSMUSG00000061833	Gm6311	2.1392	1.21917	32.944	9.48511e-09	7.30038e-08
ENSMUSG00000004558	Ndrg2	2.13787	5.52999	42.1573	8.42182e-11	8.36134e-10
ENSMUSG00000090733	Rps27	2.13632	8.52936	105.962	7.51451e-25	2.47027e-23
ENSMUSG00000093885	Rpl35a-ps5	2.13338	-0.293378	13.2111	0.000278292	0.000944717
ENSMUSG00000087632	Gm6058	2.13313	-0.101394	14.6634	0.000128518	0.000470938
ENSMUSG00000026764	Kif5c	2.13269	2.05937	23.7431	1.10089e-06	6.14544e-06
ENSMUSG00000021939	Ctsb	2.13239	12.6724	195.735	1.7809e-44	1.90904e-42
ENSMUSG00000036305	Rpl39-ps	2.13027	2.58306	55.5648	9.04278e-14	1.25135e-12
ENSMUSG00000049422	Chchd10	2.1295	2.52569	48.8726	2.73143e-12	3.26358e-11
ENSMUSG00000097660	Gm26762	2.12949	1.7525	28.0042	1.21052e-07	7.86095e-07
ENSMUSG00000027514	Zbp1	2.12871	3.98518	55.0436	1.17888e-13	1.6073e-12
ENSMUSG00000058064	Gm10036	2.12683	2.3371	57.378	3.59605e-14	5.19495e-13
ENSMUSG00000049985	Ankrd55	2.12344	0.149697	13.8334	0.000199751	0.000700882
ENSMUSG00000046432	Bex3	2.12193	3.9688	100.957	9.40181e-24	2.90357e-22
ENSMUSG00000057696	Rpl30-ps1	2.11989	0.925275	28.3232	1.02657e-07	6.75236e-07
ENSMUSG00000060938	Rpl26	2.11848	9.09801	158.667	2.21311e-36	1.42963e-34
ENSMUSG00000025794	Rpl14	2.11658	8.50568	151.663	7.50859e-35	4.42528e-33
ENSMUSG00000066315	Gm12918	2.11536	3.37511	83.3484	6.87951e-20	1.65209e-18
ENSMUSG00000072789	Gm10420	2.11418	0.48177	19.9862	7.80036e-06	3.73554e-05
ENSMUSG00000058838	Rps27a-ps2	2.11219	3.61367	99.3862	2.0776e-23	6.29794e-22
ENSMUSG00000082926	Gm8172	2.11134	0.0252784	20.4937	5.98288e-06	2.93256e-05
ENSMUSG00000064349	mt-Tc	2.11087	2.48759	52.8305	3.63604e-13	4.69764e-12
ENSMUSG00000083833	Gm13841	2.11047	4.59319	122.511	1.7838e-28	7.28943e-27
ENSMUSG00000056313	Tcim	2.10945	4.19409	113.34	1.81728e-26	6.58897e-25
ENSMUSG00000021477	Ctsl	2.10876	10.7585	210.241	1.21721e-47	1.47591e-45
ENSMUSG00000030432	Rpl28	2.10799	8.36725	144.39	2.92013e-33	1.52402e-31
ENSMUSG00000045128	Rpl18a	2.10725	9.57183	150.471	1.36788e-34	7.99805e-33
ENSMUSG00000000740	Rpl13	2.10598	9.93601	157.97	3.14122e-36	2.00293e-34
ENSMUSG00000076609	Igkc	2.10498	3.63984	13.6815	0.000216579	0.000755271
ENSMUSG00000084416	Rpl10a-ps1	2.10486	4.30444	124.491	6.57651e-29	2.78758e-27
ENSMUSG00000066632	Pgk1-rs7	2.10426	0.979756	33.0072	9.18187e-09	7.07803e-08
ENSMUSG00000056498	Tmem154	2.10221	3.58059	69.8063	6.54247e-17	1.22821e-15
ENSMUSG00000044533	Rps2	2.09899	8.96122	217.387	3.36001e-49	4.24826e-47
ENSMUSG00000062456	Rpl9-ps6	2.09896	5.54614	118.25	1.52865e-27	5.87358e-26
ENSMUSG00000041695	Kcnj2	2.09721	7.47847	210.244	1.21507e-47	1.47591e-45
ENSMUSG00000091845	Rpl36-ps12	2.0954	2.69696	46.589	8.75511e-12	9.80427e-11
ENSMUSG00000035885	Cox8a	2.09445	7.00867	117.902	1.82145e-27	6.96246e-26
ENSMUSG00000009927	Rps25	2.09278	9.28066	149.276	2.49586e-34	1.43105e-32
ENSMUSG00000091449	Gm10269	2.09048	1.33308	38.76	4.79259e-10	4.33354e-09
ENSMUSG00000036452	Arhgap26	2.0902	3.87941	113.302	1.85329e-26	6.7031e-25
ENSMUSG00000064109	Hcst	2.08613	4.33905	84.396	4.04964e-20	9.85302e-19
ENSMUSG00000067121	Gm7027	2.08586	1.69033	41.3182	1.29356e-10	1.25233e-09
ENSMUSG00000025723	Nmb	2.08133	1.64581	36.9175	1.23238e-09	1.05501e-08
ENSMUSG00000085442	Gm3362	2.07921	4.10358	90.5798	1.77665e-21	4.80476e-20
ENSMUSG00000108820	Gm44620	2.07853	0.439147	13.7406	0.000209866	0.000734108
ENSMUSG00000029591	Ung	2.07724	1.1638	23.8251	1.05496e-06	5.9002e-06
ENSMUSG00000094989	Rpl9-ps4	2.07671	3.9506	115.389	6.46636e-27	2.40949e-25
ENSMUSG00000105144	Rpl21-ps11	2.07411	1.56882	26.7191	2.35288e-07	1.46306e-06
ENSMUSG00000079641	Rpl39	2.07357	7.97588	119.455	8.32517e-28	3.26669e-26
ENSMUSG00000049871	Nlrc3	2.06881	2.5566	74.7036	5.46974e-18	1.13484e-16
ENSMUSG00000059974	Ntm	2.06383	1.3303	17.7595	2.50668e-05	0.000107889
ENSMUSG00000099764	Rps10-ps2	2.06315	7.51052	167.196	3.0305e-38	2.17622e-36
ENSMUSG00000096145	Vkorc1	2.06193	3.78637	54.7004	1.40379e-13	1.88784e-12
ENSMUSG00000029103	Lrpap1	2.06059	8.02302	154.744	1.59237e-35	9.81498e-34
ENSMUSG00000053173	Rpl18-ps2	2.0604	0.180827	18.5153	1.68544e-05	7.50985e-05
ENSMUSG00000083394	Gm11703	2.05845	3.32469	59.2802	1.36747e-14	2.04955e-13
ENSMUSG00000045594	Glb1	2.05751	7.60373	256.919	8.05726e-58	1.45355e-55
ENSMUSG00000060438	Rps10-ps1	2.05524	3.32563	58.7921	1.75244e-14	2.58929e-13
ENSMUSG00000058600	Rpl30	2.05462	8.02013	65.59	5.55201e-16	9.45119e-15
ENSMUSG00000060019	Gm10073	2.05457	4.10549	76.6112	2.08156e-18	4.44978e-17
ENSMUSG00000021109	Hif1a	2.05364	7.97445	280.395	6.15899e-63	1.26542e-60
ENSMUSG00000081094	Rpl19-ps11	2.05312	4.68376	60.5323	7.23826e-15	1.11074e-13
ENSMUSG00000062006	Rpl34	2.05254	8.53408	108.493	2.09571e-25	7.09426e-24
ENSMUSG00000064372	mt-Tp	2.05189	4.37662	65.3599	6.23953e-16	1.05972e-14
ENSMUSG00000028063	Lmna	2.05055	3.52829	78.3728	8.53197e-19	1.88942e-17
ENSMUSG00000034593	Myo5a	2.04968	6.49718	126.854	1.99929e-29	8.67317e-28
ENSMUSG00000107134	Gm42528	2.04683	-0.0580413	10.0288	0.00154113	0.00435159
ENSMUSG00000045690	Wdr89	2.04585	5.93887	132.963	9.20931e-31	4.27064e-29
ENSMUSG00000083992	Gm11478	2.04528	1.03923	29.9461	4.4423e-08	3.1115e-07
ENSMUSG00000039981	Zc3h12d	2.04343	1.03067	20.4664	6.06867e-06	2.96969e-05
ENSMUSG00000059775	Rps26-ps1	2.04219	4.13406	36.9077	1.23856e-09	1.05969e-08
ENSMUSG00000098181	Rps12-ps24	2.04016	0.547686	17.4851	2.89575e-05	0.000123236
ENSMUSG00000115205	AC117588.1	2.03519	0.195304	17.821	2.42688e-05	0.000104759
ENSMUSG00000048758	Rpl29	2.03484	8.09443	160.212	1.0168e-36	6.71498e-35
ENSMUSG00000081855	Rpl17-ps5	2.03476	3.90671	89.7019	2.76884e-21	7.36681e-20
ENSMUSG00000098893	Gm17828	2.03461	0.0563212	15.8506	6.85447e-05	0.000266908
ENSMUSG00000033763	Mtss1l	2.03333	3.6204	35.1791	3.0073e-09	2.44837e-08
ENSMUSG00000063316	Rpl27	2.03292	8.34348	156.701	5.94888e-36	3.74475e-34
ENSMUSG00000067274	Rplp0	2.03154	10.1733	172.447	2.16121e-39	1.64798e-37
ENSMUSG00000083087	Gm11249	2.03145	1.48768	29.0649	6.99921e-08	4.73864e-07
ENSMUSG00000083621	Gm14586	2.03072	2.3497	45.2583	1.72686e-11	1.86735e-10
ENSMUSG00000060591	Ifitm2	2.03023	3.57697	63.0957	1.96902e-15	3.20085e-14
ENSMUSG00000003429	Rps11	2.02991	9.08677	136.083	1.91327e-31	9.15954e-30
ENSMUSG00000073489	Ifi204	2.02965	5.19508	221.645	3.95796e-50	5.24753e-48
ENSMUSG00000069682	Gm10275	2.02867	6.94522	146.936	8.10566e-34	4.50778e-32
ENSMUSG00000020163	Uqcr11	2.02858	5.38541	77.8683	1.10147e-18	2.40681e-17
ENSMUSG00000081895	Rpl17-ps10	2.02822	7.78746	62.7379	2.36129e-15	3.80922e-14
ENSMUSG00000112148	Lilrb4	2.0254	5.76489	86.9727	1.10027e-20	2.80143e-19
ENSMUSG00000008683	Rps15a	2.02447	8.43771	162.622	3.02532e-37	2.10111e-35
ENSMUSG00000081087	Rps15a-ps7	2.02134	2.57014	56.427	5.8325e-14	8.24858e-13
ENSMUSG00000083496	Gm11263	2.02121	4.00567	67.5377	2.067e-16	3.70183e-15
ENSMUSG00000105769	Gm43351	2.01995	1.65235	20.7839	5.1413e-06	2.55476e-05
ENSMUSG00000060802	B2m	2.01719	11.8366	114.435	1.04643e-26	3.86994e-25
ENSMUSG00000032988	Slc16a8	2.01549	1.95261	28.0662	1.17238e-07	7.62328e-07
ENSMUSG00000035376	Hacd2	2.01491	6.01902	245.61	2.35255e-55	3.95468e-53
ENSMUSG00000054404	Slfn5	2.01446	5.04448	130.453	3.26137e-30	1.48448e-28
ENSMUSG00000025324	Atp10a	2.01336	2.89614	40.8785	1.61995e-10	1.54805e-09
ENSMUSG00000057329	Bcl2	2.0118	4.0703	99.6826	1.78887e-23	5.445e-22
ENSMUSG00000081684	Rps2-ps13	2.01031	4.84323	188.409	7.07386e-43	6.97624e-41
ENSMUSG00000030747	Dgat2	2.00845	1.95291	29.516	5.54565e-08	3.821e-07
ENSMUSG00000066456	Hmgn3	2.00471	3.88678	102.901	3.52239e-24	1.11577e-22
ENSMUSG00000026207	Speg	2.00182	6.1459	229.09	9.41648e-52	1.35241e-49
ENSMUSG00000028234	Rps20	2.00122	8.48785	146.152	1.20233e-33	6.51505e-32
ENSMUSG00000075268	Gm10819	2.00086	2.18727	22.8057	1.79229e-06	9.67993e-06
ENSMUSG00000061787	Rps17	2.00065	8.41038	138.883	4.67123e-32	2.29573e-30
ENSMUSG00000090610	Gm3571	2.00002	0.918212	25.0583	5.56239e-07	3.2575e-06
ENSMUSG00000080859	Rpl10-ps1	1.99988	2.91069	69.4521	7.82948e-17	1.46055e-15
ENSMUSG00000110545	Gm7730	1.99919	1.88704	38.3033	6.05588e-10	5.42937e-09
ENSMUSG00000028019	Pdgfc	1.99883	2.40751	47.8422	4.61942e-12	5.34703e-11
ENSMUSG00000095597	Gm6472	1.9953	6.79664	171.212	4.02307e-39	3.00572e-37
ENSMUSG00000026688	Mgst3	1.99445	3.99888	80.6827	2.65028e-19	6.11625e-18
ENSMUSG00000072692	Rpl37rt	1.99412	5.76117	130.733	2.8319e-30	1.29697e-28
ENSMUSG00000109237	9130214F15Rik	1.99336	0.843295	13.5737	0.000229378	0.000796337
ENSMUSG00000113948	Rpl17-ps3	1.99317	7.23415	194.801	2.84797e-44	3.03094e-42
ENSMUSG00000110679	Rpl10-ps5	1.98923	2.88295	67.668	1.93483e-16	3.48623e-15
ENSMUSG00000063882	Uqcrh	1.98867	6.69534	137.17	1.10691e-31	5.35116e-30
ENSMUSG00000046364	Rpl27a	1.988	9.24258	122.573	1.72965e-28	7.1074e-27
ENSMUSG00000019851	Perp	1.98408	3.09073	50.3953	1.25698e-12	1.56388e-11
ENSMUSG00000091086	Rpl6l	1.98392	6.06631	149.415	2.32752e-34	1.35024e-32
ENSMUSG00000023046	Igfbp6	1.98363	0.362528	10.1202	0.00146656	0.00416489
ENSMUSG00000066362	Rps13-ps1	1.98056	2.99489	66.3588	3.75868e-16	6.58508e-15
ENSMUSG00000113061	Gm11361	1.97906	3.01874	63.9642	1.26698e-15	2.09647e-14
ENSMUSG00000034714	Ttyh2	1.97787	4.6599	185.262	3.44084e-42	3.20128e-40
ENSMUSG00000007892	Rplp1	1.97622	10.3865	103.379	2.76794e-24	8.86281e-23
ENSMUSG00000058558	Rpl5	1.97576	9.57151	159.64	1.35605e-36	8.87612e-35
ENSMUSG00000022893	Adamts1	1.9743	4.96081	55.5786	8.97967e-14	1.24378e-12
ENSMUSG00000096942	Rps19-ps6	1.97411	3.26252	58.8749	1.68026e-14	2.4881e-13
ENSMUSG00000059070	Rpl18	1.97244	8.86284	150.158	1.60139e-34	9.3265e-33
ENSMUSG00000081344	Gm14303	1.97074	5.42537	72.1024	2.04315e-17	3.99792e-16
ENSMUSG00000062328	Rpl17	1.96994	7.45619	44.3296	2.77482e-11	2.90913e-10
ENSMUSG00000106574	Gm2451	1.96818	0.926646	28.4859	9.4383e-08	6.24981e-07
ENSMUSG00000029417	Cxcl9	1.96633	2.09917	20.5574	5.78682e-06	2.84117e-05
ENSMUSG00000004707	Ly9	1.96624	6.80358	234.451	6.37864e-53	9.53123e-51
ENSMUSG00000028998	Tomm7	1.96597	4.5468	77.0002	1.70943e-18	3.68087e-17
ENSMUSG00000081929	Rps11-ps2	1.96458	0.870138	19.0037	1.30463e-05	5.95475e-05
ENSMUSG00000084111	Gm15710	1.96401	3.94833	85.638	2.16085e-20	5.35434e-19
ENSMUSG00000021290	2010107E04Rik	1.964	5.66102	108.868	1.73484e-25	5.91324e-24
ENSMUSG00000030376	Slc8a2	1.96209	0.865594	19.3934	1.06376e-05	4.92371e-05
ENSMUSG00000094530	Gm21399	1.96129	0.125641	14.7327	0.000123878	0.000455966
ENSMUSG00000081559	Gm12411	1.96033	2.95678	15.947	6.51423e-05	0.000255001
ENSMUSG00000034892	Rps29	1.95979	9.08812	77.9437	1.06019e-18	2.33037e-17
ENSMUSG00000059064	Gm10059	1.95965	1.07205	19.9146	8.09782e-06	3.86298e-05
ENSMUSG00000064337	mt-Rnr1	1.95615	7.42037	97.13	6.49233e-23	1.90936e-21
ENSMUSG00000094344	Gm11942	1.95597	2.55034	43.9669	3.33977e-11	3.4817e-10
ENSMUSG00000066724	Gm10175	1.95584	2.77197	63.9237	1.29335e-15	2.13772e-14
ENSMUSG00000106926	Rpl7-ps7	1.9555	0.845999	24.8621	6.15815e-07	3.57666e-06
ENSMUSG00000068523	Gng5	1.9555	7.24575	129.355	5.67011e-30	2.54176e-28
ENSMUSG00000021822	Plau	1.95415	7.87552	203.418	3.74916e-46	4.29933e-44
ENSMUSG00000071068	Treml2	1.95381	5.16474	210.35	1.15218e-47	1.42035e-45
ENSMUSG00000031818	Cox4i1	1.95293	8.26549	142.122	9.14772e-33	4.69869e-31
ENSMUSG00000038900	Rpl12	1.95255	9.12973	144.248	3.13551e-33	1.6275e-31
ENSMUSG00000055013	Agap1	1.95152	4.76066	148.133	4.43634e-34	2.50484e-32
ENSMUSG00000043953	Ccrl2	1.9515	5.29162	70.713	4.13171e-17	7.89668e-16
ENSMUSG00000084106	Gm6136	1.95137	6.91285	202.335	6.45948e-46	7.23903e-44
ENSMUSG00000027239	Mdk	1.95121	2.04532	45.7202	1.36409e-11	1.49253e-10
ENSMUSG00000059291	Rpl11	1.95102	8.88171	134.992	3.31425e-31	1.56638e-29
ENSMUSG00000073421	H2-Ab1	1.94991	8.30652	113.844	1.41007e-26	5.13773e-25
ENSMUSG00000099471	Gm8451	1.94695	2.04192	46.7566	8.03738e-12	9.06226e-11
ENSMUSG00000106037	Gm4332	1.94487	4.65876	87.62	7.9317e-21	2.03704e-19
ENSMUSG00000025498	Irf7	1.94425	4.76959	77.6976	1.20086e-18	2.60856e-17
ENSMUSG00000046093	Hpcal4	1.94391	0.947796	20.2007	6.97289e-06	3.37312e-05
ENSMUSG00000022619	Mapk8ip2	1.94328	0.201684	5.68636	0.0170973	0.0357889
ENSMUSG00000044339	Alkbh2	1.94226	3.52929	66.3574	3.76151e-16	6.58508e-15
ENSMUSG00000033082	Clec1a	1.94156	2.74584	68.0181	1.62005e-16	2.94055e-15
ENSMUSG00000098104	Gm6085	1.93954	-0.436311	8.05482	0.00453828	0.0113226
ENSMUSG00000029614	Rpl6	1.93931	9.42528	143.349	4.93063e-33	2.54142e-31
ENSMUSG00000115457	AC022775.2	1.93914	0.970515	25.8682	3.65532e-07	2.19988e-06
ENSMUSG00000090136	Gm10177	1.93785	3.24945	69.4972	7.65247e-17	1.43114e-15
ENSMUSG00000084131	Rpl3-ps2	1.93607	0.860153	26.3258	2.88406e-07	1.76662e-06
ENSMUSG00000019158	Tmem160	1.93377	5.14448	86.1414	1.67517e-20	4.19303e-19
ENSMUSG00000071324	Armc2	1.93356	1.66798	41.2125	1.36545e-10	1.31419e-09
ENSMUSG00000072949	Acot1	1.93355	1.35121	33.2135	8.2577e-09	6.40464e-08
ENSMUSG00000039081	Zfp503	1.93267	1.40966	15.4369	8.53056e-05	0.00032482
ENSMUSG00000079445	B3gnt7	1.93225	2.88493	37.3376	9.93491e-10	8.62483e-09
ENSMUSG00000026249	Serpine2	1.9316	10.1464	228.767	1.10706e-51	1.57468e-49
ENSMUSG00000046718	Bst2	1.93058	7.22801	94.8278	2.07685e-22	5.90824e-21
ENSMUSG00000081343	Gm16071	1.93048	0.268404	10.4517	0.00122537	0.00356196
ENSMUSG00000063754	Gm10136	1.92821	2.14312	43.9803	3.31693e-11	3.46032e-10
ENSMUSG00000030744	Rps3	1.92781	9.66944	146.209	1.1683e-33	6.35393e-32
ENSMUSG00000037242	Clic4	1.9219	5.26259	130.306	3.51307e-30	1.58926e-28
ENSMUSG00000025161	Slc16a3	1.92161	6.88897	100.966	9.35621e-24	2.89553e-22
ENSMUSG00000036402	Gng12	1.92089	6.95689	205.71	1.18518e-46	1.39146e-44
ENSMUSG00000067847	Romo1	1.91762	4.55811	68.6532	1.17396e-16	2.15464e-15
ENSMUSG00000001289	Pfdn5	1.91733	7.58931	145.356	1.79567e-33	9.58964e-32
ENSMUSG00000063696	Gm8730	1.91595	2.70663	57.2593	3.81973e-14	5.50734e-13
ENSMUSG00000083411	Rpl30-ps10	1.9139	5.04623	31.3176	2.19082e-08	1.59571e-07
ENSMUSG00000060636	Rpl35a	1.91173	8.20514	112.45	2.84746e-26	1.01745e-24
ENSMUSG00000021242	Npc2	1.91155	10.1765	147.747	5.38851e-34	3.00801e-32
ENSMUSG00000061477	Rps7	1.91143	8.60386	157.688	3.62173e-36	2.29941e-34
ENSMUSG00000078974	Sec61g	1.90711	5.13952	68.0442	1.59867e-16	2.9053e-15
ENSMUSG00000049760	2410015M20Rik	1.90672	4.85724	86.7284	1.24497e-20	3.14819e-19
ENSMUSG00000061232	H2-K1	1.90404	10.0286	183.351	8.99042e-42	8.06032e-40
ENSMUSG00000090862	Rps13	1.90385	8.19463	122.373	1.9129e-28	7.79545e-27
ENSMUSG00000031320	Rps4x	1.90374	9.79899	175.353	5.01404e-40	3.96645e-38
ENSMUSG00000002014	Ssr4	1.90281	7.62241	114.069	1.25841e-26	4.59647e-25
ENSMUSG00000025967	Eef1b2	1.90276	8.34138	164.063	1.46554e-37	1.02748e-35
ENSMUSG00000023067	Cdkn1a	1.90168	4.77585	103.072	3.23237e-24	1.02831e-22
ENSMUSG00000047721	Bola2	1.90162	5.36559	96.8947	7.31158e-23	2.14179e-21
ENSMUSG00000008682	Rpl10	1.90118	10.1123	141.358	1.34359e-32	6.83015e-31
ENSMUSG00000034854	Mfsd12	1.90109	6.43518	145.057	2.08649e-33	1.10234e-31
ENSMUSG00000025068	Gsto1	1.89941	5.78818	102.468	4.38348e-24	1.38557e-22
ENSMUSG00000032353	Tmed3	1.89929	7.4692	161.608	5.03793e-37	3.41863e-35
ENSMUSG00000074896	Ifit3	1.89924	4.82515	106.205	6.65027e-25	2.19592e-23
ENSMUSG00000063193	Cd300lb	1.89888	2.74242	63.0912	1.97354e-15	3.20467e-14
ENSMUSG00000086583	Gm15500	1.8984	6.03185	128.068	1.08475e-29	4.76161e-28
ENSMUSG00000038552	Fndc4	1.89797	2.82085	52.6103	4.06741e-13	5.22302e-12
ENSMUSG00000108772	Gm6063	1.89728	-0.251089	10.8627	0.000981226	0.00291121
ENSMUSG00000105870	7330423F06Rik	1.89654	1.46368	20.2	6.97541e-06	3.37323e-05
ENSMUSG00000029455	Aldh2	1.89539	7.20936	248.51	5.48504e-56	9.65955e-54
ENSMUSG00000048915	Efna5	1.89402	0.89767	13.5641	0.000230549	0.000799463
ENSMUSG00000028519	Dab1	1.89171	0.905215	11.8353	0.000581187	0.00182576
ENSMUSG00000025190	Got1	1.89164	6.25752	293.298	9.50598e-66	2.038e-63
ENSMUSG00000083061	Gm12191	1.89119	5.65594	86.4843	1.40855e-20	3.55574e-19
ENSMUSG00000062582	Rpl30-ps8	1.8903	1.058	17.4917	2.88565e-05	0.000122877
ENSMUSG00000068227	Il2rb	1.8898	1.54967	24.1229	9.03773e-07	5.10676e-06
ENSMUSG00000047215	Rpl9	1.88819	8.65044	116.785	3.19959e-27	1.20744e-25
ENSMUSG00000036427	Gpi1	1.88687	8.40164	221.638	3.97298e-50	5.24753e-48
ENSMUSG00000036594	H2-Aa	1.88531	8.28696	98.1028	3.97224e-23	1.1847e-21
ENSMUSG00000096474	Gm5561	1.88011	-0.246231	10.8441	0.000991131	0.00293412
ENSMUSG00000110686	Gm45855	1.87671	3.11081	72.9554	1.32614e-17	2.63676e-16
ENSMUSG00000018537	Pcgf2	1.87644	2.75257	58.2851	2.26751e-14	3.32112e-13
ENSMUSG00000025534	Gusb	1.87543	9.33009	190.439	2.55042e-43	2.58414e-41
ENSMUSG00000081406	Rps6-ps4	1.87517	4.84456	153.983	2.3356e-35	1.41022e-33
ENSMUSG00000078377	Gm4294	1.87461	3.67729	83.4189	6.63853e-20	1.59681e-18
ENSMUSG00000004891	Nes	1.87328	4.09869	85.4841	2.33575e-20	5.76841e-19
ENSMUSG00000037999	Arap2	1.87327	4.70799	110.528	7.50808e-26	2.6257e-24
ENSMUSG00000036751	Cox6b1	1.87224	6.50106	107.01	4.42945e-25	1.47579e-23
ENSMUSG00000037499	Nenf	1.87208	5.49171	85.7818	2.0093e-20	4.99556e-19
ENSMUSG00000032661	Oas3	1.87164	2.45289	54.26	1.75641e-13	2.33237e-12
ENSMUSG00000028936	Rpl22	1.87032	8.07899	146.363	1.08123e-33	5.90206e-32
ENSMUSG00000082475	Gm7206	1.86963	1.4411	30.1566	3.98534e-08	2.80739e-07
ENSMUSG00000058603	Rpl28-ps1	1.86806	4.97398	89.328	3.34497e-21	8.86778e-20
ENSMUSG00000003970	Rpl8	1.86665	9.08978	136.447	1.593e-31	7.67599e-30
ENSMUSG00000047675	Rps8	1.86633	8.84781	106.327	6.2508e-25	2.06864e-23
ENSMUSG00000063229	Ldha	1.86484	8.14135	141.006	1.60445e-32	8.07301e-31
ENSMUSG00000062382	Ftl1-ps1	1.86256	4.43478	104.12	1.90422e-24	6.15046e-23
ENSMUSG00000073616	Cops9	1.8604	5.6599	100.254	1.34026e-23	4.12194e-22
ENSMUSG00000080776	Gm12174	1.85862	3.51674	91.4753	1.12996e-21	3.08403e-20
ENSMUSG00000028495	Rps6	1.85541	9.19286	187.448	1.14659e-42	1.11589e-40
ENSMUSG00000060198	Gm11353	1.85469	2.37898	46.6281	8.5819e-12	9.62487e-11
ENSMUSG00000104699	Rps4x-ps	1.85454	-0.0846191	10.1936	0.00140925	0.00402375
ENSMUSG00000001348	Acp5	1.85414	0.187215	13.0108	0.000309692	0.00103931
ENSMUSG00000032656	2024-03-03	1.85314	2.35968	48.7563	2.89822e-12	3.44642e-11
ENSMUSG00000115855	AC102815.3	1.85167	0.00304668	9.1395	0.00250149	0.0066675
ENSMUSG00000101795	Gm5835	1.85102	0.515291	16.3369	5.30217e-05	0.000211258
ENSMUSG00000083307	AA414768	1.84966	1.82511	36.112	1.86295e-09	1.5561e-08
ENSMUSG00000054793	Cadm4	1.84908	3.75744	72.9979	1.2979e-17	2.59107e-16
ENSMUSG00000066068	Gm13611	1.84739	0.788704	19.516	9.97634e-06	4.65405e-05
ENSMUSG00000000301	Pemt	1.84706	0.672507	16.7603	4.24122e-05	0.000173652
ENSMUSG00000019528	Gyg	1.8465	5.62369	182.25	1.56386e-41	1.37703e-39
ENSMUSG00000114401	Gm38604	1.84598	0.512356	6.63825	0.00998121	0.0224668
ENSMUSG00000050708	Ftl1	1.84594	9.92991	121.001	3.81959e-28	1.53125e-26
ENSMUSG00000047905	Gm8566	1.84434	0.959497	17.3061	3.18169e-05	0.000134323
ENSMUSG00000016252	Atp5e	1.84425	6.54019	85.8355	1.95541e-20	4.86975e-19
ENSMUSG00000039209	Rpl39l	1.84149	0.883952	8.97335	0.00273946	0.00721852
ENSMUSG00000037805	Rpl10a	1.84104	9.35531	154.003	2.3129e-35	1.40409e-33
ENSMUSG00000020057	Dram1	1.83921	1.9833	33.3329	7.76565e-09	6.04935e-08
ENSMUSG00000081058	Hist2h3c2	1.83893	0.684415	20.5824	5.71189e-06	2.80718e-05
ENSMUSG00000024654	Asrgl1	1.83863	3.26091	54.348	1.67945e-13	2.23821e-12
ENSMUSG00000019874	Fabp7	1.83669	-0.0601912	8.58442	0.00339052	0.00872795
ENSMUSG00000068706	Gm10250	1.83401	4.03605	82.9984	8.21193e-20	1.94991e-18
ENSMUSG00000075010	AW112010	1.8339	3.96599	63.4686	1.62946e-15	2.66644e-14
ENSMUSG00000025232	Hexa	1.83336	10.7047	181.913	1.85257e-41	1.6216e-39
ENSMUSG00000043079	Synpo	1.83322	2.14225	22.8477	1.7536e-06	9.49209e-06
ENSMUSG00000014294	Ndufa2	1.83013	5.75928	62.9509	2.1192e-15	3.43367e-14
ENSMUSG00000070000	Fcho1	1.82986	2.00127	28.8489	7.82497e-08	5.2568e-07
ENSMUSG00000095478	Gm9824	1.82913	3.95819	21.3407	3.84485e-06	1.94717e-05
ENSMUSG00000038331	Satb2	1.82837	1.81268	33.9081	5.77791e-09	4.57317e-08
ENSMUSG00000110275	Gm5905	1.82831	1.49084	34.4055	4.47459e-09	3.57604e-08
ENSMUSG00000042712	Tceal9	1.82727	4.69009	87.699	7.62127e-21	1.96414e-19
ENSMUSG00000023992	Trem2	1.82707	11.6846	100.142	1.41824e-23	4.3437e-22
ENSMUSG00000082536	Gm13456	1.82097	5.20495	175.97	3.67661e-40	2.92409e-38
ENSMUSG00000015340	Cybb	1.81969	6.28638	174.403	8.08483e-40	6.32798e-38
ENSMUSG00000039043	Arpin	1.81703	0.345989	11.1995	0.000818198	0.0024767
ENSMUSG00000025795	Rassf3	1.816	6.45515	144.535	2.7136e-33	1.42348e-31
ENSMUSG00000068396	Rpl34-ps1	1.81511	5.54181	46.5125	9.10379e-12	1.01716e-10
ENSMUSG00000072572	Slc39a2	1.81286	1.4429	18.5101	1.69009e-05	7.52606e-05
ENSMUSG00000055839	Elob	1.81136	6.32164	96.801	7.66589e-23	2.24114e-21
ENSMUSG00000036957	Lrfn3	1.80893	2.95309	57.0613	4.22427e-14	6.07875e-13
ENSMUSG00000020635	Fkbp1b	1.80629	2.43424	36.2309	1.75272e-09	1.46817e-08
ENSMUSG00000069972	Rps13-ps2	1.80453	3.0266	48.2446	3.76234e-12	4.38584e-11
ENSMUSG00000025875	Tspan17	1.80315	2.73962	61.0519	5.55896e-15	8.6653e-14
ENSMUSG00000056836	Gm6851	1.80059	0.284463	10.83	0.000998682	0.00295529
ENSMUSG00000004032	Gstm5	1.79985	3.96162	47.0756	6.83019e-12	7.74245e-11
ENSMUSG00000045932	Ifit2	1.79977	4.72477	112.106	3.38742e-26	1.20747e-24
ENSMUSG00000070343	Gm10288	1.79975	3.40225	63.7064	1.44416e-15	2.37636e-14
ENSMUSG00000066543	Rpl17-ps9	1.79798	0.569504	16.5234	4.80529e-05	0.000193533
ENSMUSG00000030342	Cd9	1.79698	10.3901	145.654	1.54486e-33	8.31023e-32
ENSMUSG00000031029	Eif3f	1.79603	8.09537	171.841	2.93156e-39	2.22393e-37
ENSMUSG00000056413	Adap1	1.795	6.21056	135.585	2.4595e-31	1.16988e-29
ENSMUSG00000081214	Rpl35a-ps2	1.79462	1.46881	27.8606	1.30378e-07	8.42218e-07
ENSMUSG00000113902	AC121965.1	1.79187	4.98659	48.4927	3.31525e-12	3.89535e-11
ENSMUSG00000001783	Rtcb	1.79118	7.58252	242.587	1.07329e-54	1.70722e-52
ENSMUSG00000023982	Guca1a	1.79094	3.40451	40.7619	1.71956e-10	1.63796e-09
ENSMUSG00000084319	Tpt1-ps3	1.79044	6.51249	141.536	1.2281e-32	6.26459e-31
ENSMUSG00000082035	Rpl17-ps8	1.78947	0.586191	17.6295	2.68391e-05	0.000114981
ENSMUSG00000062758	Gm16477	1.78923	2.52721	37.5733	8.80404e-10	7.68367e-09
ENSMUSG00000059278	Naa38	1.78911	3.93268	57.5408	3.31038e-14	4.80103e-13
ENSMUSG00000091649	Phf11b	1.78742	5.36204	94.5064	2.44302e-22	6.92329e-21
ENSMUSG00000109509	Rps12-ps4	1.78442	1.33879	17.7568	2.5102e-05	0.000107979
ENSMUSG00000006333	Rps9	1.78394	9.96377	116.061	4.61005e-27	1.73087e-25
ENSMUSG00000057605	Gm6807	1.78333	1.48128	29.0701	6.98069e-08	4.73044e-07
ENSMUSG00000020814	Mxra7	1.78278	2.52354	56.9256	4.52611e-14	6.50045e-13
ENSMUSG00000024248	Cox7a2l	1.78275	7.80401	177.758	1.49572e-40	1.21573e-38
ENSMUSG00000038803	Ost4	1.77843	4.89036	95.0594	1.84758e-22	5.28652e-21
ENSMUSG00000115584	AC154477.1	1.77839	3.78014	70.5639	4.45595e-17	8.48352e-16
ENSMUSG00000110959	Gm47198	1.77811	-0.154641	9.85386	0.00169476	0.00473565
ENSMUSG00000028081	Rps3a1	1.77747	9.68393	136.289	1.7247e-31	8.28359e-30
ENSMUSG00000060126	Tpt1	1.77247	10.8716	130.083	3.92938e-30	1.77218e-28
ENSMUSG00000071451	Psmg4	1.7712	3.79243	70.5736	4.43408e-17	8.45275e-16
ENSMUSG00000049124	Gm8186	1.77062	2.6889	39.7295	2.91691e-10	2.71554e-09
ENSMUSG00000029401	Rilpl2	1.7704	3.85195	102.437	4.45211e-24	1.40331e-22
ENSMUSG00000062461	Gm5453	1.77015	-0.233793	7.44981	0.00634431	0.0151814
ENSMUSG00000012405	Rpl15	1.76984	7.734	124.138	7.86008e-29	3.30324e-27
ENSMUSG00000042737	Dpm3	1.7633	4.67264	73.0988	1.23322e-17	2.46528e-16
ENSMUSG00000023078	Cxcl13	1.7632	1.26896	8.72518	0.00313846	0.00816087
ENSMUSG00000022945	Chaf1b	1.76234	1.3123	18.3605	1.82804e-05	8.08197e-05
ENSMUSG00000020372	Rack1	1.76106	9.49011	160.432	9.10328e-37	6.06598e-35
ENSMUSG00000062933	Gm10123	1.75827	6.45833	69.5861	7.31509e-17	1.36977e-15
ENSMUSG00000005465	Il27ra	1.75784	0.83134	17.3441	3.11869e-05	0.000132002
ENSMUSG00000056290	Ms4a4b	1.75711	0.439071	13.5969	0.000226555	0.000787091
ENSMUSG00000006519	Cyba	1.75684	9.095	84.9246	3.0996e-20	7.59146e-19
ENSMUSG00000084383	Gm13370	1.7557	2.27845	35.1384	3.07079e-09	2.49457e-08
ENSMUSG00000107383	Gm4366	1.75538	4.22839	91.3965	1.17587e-21	3.20343e-20
ENSMUSG00000028871	Rspo1	1.7549	2.72509	37.2468	1.04084e-09	9.01471e-09
ENSMUSG00000053963	Stum	1.75483	0.666558	11.3064	0.000772407	0.00235682
ENSMUSG00000062683	Atp5g2	1.75463	7.0065	115.4	6.4328e-27	2.40304e-25
ENSMUSG00000104145	D130019J16Rik	1.75418	1.82154	19.7414	8.86615e-06	4.19568e-05
ENSMUSG00000069270	Hist1h2ac	1.75274	0.320256	13.6283	0.000222799	0.00077477
ENSMUSG00000079941	Gm11273	1.75134	2.85249	41.4112	1.23348e-10	1.20045e-09
ENSMUSG00000084349	Rpl3-ps1	1.7509	6.25586	125.575	3.80936e-29	1.63813e-27
ENSMUSG00000053565	Eif3k	1.75059	6.89181	145.327	1.82171e-33	9.69372e-32
ENSMUSG00000067147	Rpl7a-ps11	1.74977	3.2419	75.5458	3.57021e-18	7.52338e-17
ENSMUSG00000016758	Bik	1.74933	2.01533	36.6953	1.38109e-09	1.17281e-08
ENSMUSG00000001751	Naglu	1.74728	8.59974	125.084	4.87782e-29	2.08548e-27
ENSMUSG00000084830	Gm14539	1.74519	1.47089	16.8853	3.97074e-05	0.000164168
ENSMUSG00000034570	Inpp5j	1.74388	0.413761	9.32078	0.00226569	0.00609751
ENSMUSG00000044986	Tst	1.74342	1.30068	15.9184	6.61335e-05	0.000258471
ENSMUSG00000051319	1500011K16Rik	1.74275	4.11831	52.8584	3.58474e-13	4.63541e-12
ENSMUSG00000050856	Atp5k	1.74262	4.49025	42.0156	9.05462e-11	8.94756e-10
ENSMUSG00000061451	Tmem151a	1.74172	2.59645	39.6739	3.00117e-10	2.78871e-09
ENSMUSG00000113625	Gm3379	1.73942	1.95557	33.5211	7.04951e-09	5.52967e-08
ENSMUSG00000062611	Rps3a2	1.73879	2.88748	52.6865	3.9128e-13	5.03761e-12
ENSMUSG00000071528	Usmg5	1.73876	5.15544	66.1288	4.22392e-16	7.33385e-15
ENSMUSG00000038738	Shank1	1.73833	1.62148	14.3035	0.000155576	0.000560915
ENSMUSG00000109933	Gm7600	1.73592	1.10577	18.5528	1.65264e-05	7.37925e-05
ENSMUSG00000034932	Mrpl54	1.73494	4.17804	32.2851	1.33128e-08	1.00375e-07
ENSMUSG00000060739	Nsa2	1.73299	6.8206	180.684	3.43692e-41	2.92197e-39
ENSMUSG00000020841	Cpd	1.73243	7.24769	189.31	4.49623e-43	4.4941e-41
ENSMUSG00000037905	Bri3bp	1.73235	5.33667	108.904	1.70377e-25	5.83423e-24
ENSMUSG00000025290	Rps24	1.73123	9.59819	118.518	1.33519e-27	5.1841e-26
ENSMUSG00000110027	C030029H02Rik	1.72903	0.287432	11.6256	0.000650487	0.00202114
ENSMUSG00000074813	Gm14005	1.72681	1.47783	26.1126	3.2207e-07	1.95181e-06
ENSMUSG00000031097	Tnni2	1.72442	4.24475	62.397	2.80748e-15	4.48984e-14
ENSMUSG00000064193	Gm4735	1.72196	2.67288	45.7301	1.35718e-11	1.48724e-10
ENSMUSG00000057278	Snrpg	1.71919	5.25131	73.4106	1.053e-17	2.12221e-16
ENSMUSG00000039013	Siglec5	1.71824	6.06759	223.689	1.41816e-50	1.92467e-48
ENSMUSG00000107355	AI839979	1.71789	0.826472	16.6575	4.47734e-05	0.00018206
ENSMUSG00000037742	Eef1a1	1.71782	12.4428	140.699	1.87179e-32	9.38623e-31
ENSMUSG00000053931	Cnn3	1.71712	2.9711	36.2164	1.76575e-09	1.47742e-08
ENSMUSG00000101249	Gm29216	1.71671	4.61788	59.2269	1.40497e-14	2.09937e-13
ENSMUSG00000022312	Eif3h	1.7154	7.55188	176.664	2.59345e-40	2.08505e-38
ENSMUSG00000024909	Efemp2	1.71525	4.6977	104.132	1.89317e-24	6.12817e-23
ENSMUSG00000030577	Cd22	1.71464	5.59649	78.6073	7.57692e-19	1.68296e-17
ENSMUSG00000030159	Clec1b	1.71454	1.47007	29.5732	5.38437e-08	3.7168e-07
ENSMUSG00000063875	Rps6-ps1	1.71304	0.25814	13.6513	0.00022009	0.00076643
ENSMUSG00000104802	Gm5869	1.71121	1.62216	22.8473	1.75395e-06	9.49209e-06
ENSMUSG00000068267	Cenpb	1.71096	6.61712	97.3084	5.93292e-23	1.74832e-21
ENSMUSG00000024205	Rpl36-ps2	1.70954	0.126869	12.6954	0.000366549	0.00121035
ENSMUSG00000034926	Dhcr24	1.70823	2.73575	32.013	1.53147e-08	1.14189e-07
ENSMUSG00000034612	Chst11	1.70764	6.60333	172.531	2.07209e-39	1.59648e-37
ENSMUSG00000017466	Timp2	1.70734	10.1155	149.297	2.46971e-34	1.42157e-32
ENSMUSG00000068324	Gm10029	1.70681	0.0254517	11.4506	0.000714714	0.00219352
ENSMUSG00000004285	Atp6v1f	1.70467	6.93813	94.4939	2.4585e-22	6.95384e-21
ENSMUSG00000081604	Gm11518	1.70315	3.11196	52.1598	5.11619e-13	6.53573e-12
ENSMUSG00000028494	Plin2	1.70085	6.04555	139.996	2.6678e-32	1.32878e-30
ENSMUSG00000035048	Anapc13	1.70004	5.54977	69.9624	6.04442e-17	1.13905e-15
ENSMUSG00000026672	Optn	1.69998	3.43519	81.823	1.48838e-19	3.48933e-18
ENSMUSG00000014313	Cox6c	1.69934	6.3551	76.8376	1.85613e-18	3.97938e-17
ENSMUSG00000070394	Tmem256	1.69917	4.87755	56.4235	5.84284e-14	8.25531e-13
ENSMUSG00000074800	Gm4149	1.69907	2.55702	32.166	1.41545e-08	1.06342e-07
ENSMUSG00000019843	Fyn	1.69883	5.04188	158.932	1.93613e-36	1.25619e-34
ENSMUSG00000063524	Eno1	1.69858	9.07206	146.645	9.38419e-34	5.17986e-32
ENSMUSG00000043716	Rpl7	1.69833	9.55972	146.455	1.03247e-33	5.67781e-32
ENSMUSG00000037411	Serpine1	1.69397	5.4108	48.583	3.16596e-12	3.74209e-11
ENSMUSG00000026879	Gsn	1.69231	4.63866	145.749	1.47295e-33	7.95232e-32
[truncated: 933 more rows]

## Sheet: M 5X NX vs 5X CIH
	Gene name	logFC	logCPM	LR	PValue	FDR
ENSMUSG00000007877	TCAP	1.14966	3.86732	21.5398	3.47e-06	0.0496772
