# Supplementary material for: Chronic Intermittent Hypoxia Exposure Induces a Unique Microglial Transcriptome in 5XFAD Mice
Source: Mol Neurobiol. 2025 Nov 19;63(1):81. doi: 10.1007/s12035-025-05390-7 (PMC12627174; doi:10.1007/s12035-025-05390-7)
Supplement: Supplementary file 3 — (XLSX 1.01 MB) [file 12035_2025_5390_MOESM3_ESM.xlsx]

## Sheet: Female 5X compare (3)
IH 5X v IH WT		genes	logFC	logCPM	LR	PValue	FDR							NX 5X vs NX WT		genes	logFC	logCPM	LR	PValue	FDR
	Gm39847	26	-2.94024	-0.316351	28.1395	1.12881e-07	6.43168e-07								Ctsk	1413	-5.11352	2.88767	20.3395	6.48492e-06	4.52888e-05		571
	Ccr7	17	-2.55133	-0.543519	15.3244	9.05402e-05	0.000328478								Retnla	54	-4.11479	-0.361401	29.7924	4.80874e-08	4.98453e-07
	4930453L07Rik	29	-2.34903	-0.487214	18.3997	1.79088e-05	7.39923e-05								Pdpn	546	-3.76386	1.76454	14.9198	0.000112177	0.000584169
	Gm9522	64	-2.08823	1.39546	8.20233	0.00418365	0.010487								Acp5	856	-3.20009	2.32095	10.1577	0.00143702	0.00544665
	Efna4	27	-2.00336	-0.0321905	24.2806	8.32737e-07	4.2077e-06								Emb	628	-3.19262	2.73108	38.4185	5.70881e-10	8.04437e-09
	Gm11655	21	-1.92815	-0.225305	18.1566	2.03467e-05	8.2984e-05								Anxa1	1197	-3.16921	2.92851	14.9543	0.000110146	0.00057423
	Gm21761	47	-1.92165	0.404225	26.0079	3.40015e-07	1.81394e-06								Clec4n	954	-2.8143	2.68016	15.1938	9.7023e-05	0.000514342
	Clec4a4	24	-1.90854	-0.348468	15.5494	8.03778e-05	0.000294258								Cxcr2	483	-2.75178	1.73016	11.7649	0.000603569	0.00255762
	Gck	24	-1.8786	-0.175429	9.83462	0.00171258	0.00471752								S100a4	343	-2.75141	1.70888	25.4881	4.45109e-07	3.9117e-06
	Gm51695	34	-1.85925	0.320062	23.0315	1.59367e-06	7.74297e-06								Emp1	749	-2.69825	2.19113	7.84253	0.00510313	0.0161675
	Gm8817	34	-1.79125	0.124468	19.2772	1.1305e-05	4.82175e-05								Gm3227	26	-2.59835	-0.554328	26.0741	3.2856e-07	2.94974e-06
	Gm21103	41	-1.78326	0.534431	27.6122	1.48238e-07	8.34732e-07								Gda	693	-2.58217	2.36054	14.5738	0.000134776	0.000685458
	Dcaf12l1	9	-1.6659	-0.3001	11.5724	0.000669369	0.00203776								Cd24a	509	-2.58164	1.96201	14.9915	0.000107996	0.000564315
	Gm32017	19	-1.65506	-0.249919	13.1011	0.000295129	0.000968262								Rara	230	-2.55257	1.24321	23.2714	1.40677e-06	1.12343e-05
	Gm31095	37	-1.64692	-0.160984	9.35956	0.00221826	0.00596934								Dpep2	232	-2.55133	0.995547	14.6557	0.000129042	0.000661526
	Gm23369	22	-1.64077	-0.281135	13.5869	0.000227776	0.000764775								Krt80	158	-2.54663	0.964873	22.4017	2.21183e-06	1.69438e-05
	Vsnl1	21	-1.6343	-0.18741	11.42	0.000726572	0.00219044								Cd36	3048	-2.54272	4.42242	14.9487	0.000110477	0.000575739
	Gm12977	85	-1.61207	1.55262	30.5054	3.32942e-08	2.02798e-07								Ifitm1	280	-2.5412	1.04258	8.00991	0.0046522	0.0149668
	Gm40773	20	-1.59779	-0.126297	15.6604	7.57959e-05	0.000279267								Steap2	47	-2.4788	1.20948	22.0851	2.60823e-06	1.97664e-05
	Rnf152	4	-1.49991	-0.0866227	7.80791	0.0052018	0.0126863								Hp	529	-2.47144	2.20858	15.9606	6.4675e-05	0.000356759
	Gm42074	30	-1.46928	0.160432	15.6917	7.45517e-05	0.00027509								Sod3	42	-2.37575	0.262209	22.0975	2.59151e-06	1.96713e-05
	Gm15774	222	-1.46362	3.09769	46.1097	1.11811e-11	9.93572e-11								Sell	204	-2.37038	0.969568	12.9038	0.000327919	0.00150153
	Gfra2	6	-1.46277	-0.452635	5.97384	0.0145196	0.0315692								Miat	18	-2.36928	0.153308	15.9853	6.38364e-05	0.000353097
	Gm34105	14	-1.45979	-0.272561	11.8982	0.000561883	0.00173462								Mmp8	375	-2.35936	1.50318	9.46336	0.00209617	0.00757953
	3300005D01Rik	19	-1.45539	-0.0294169	11.6431	0.000644409	0.00196619								Ccr1	1436	-2.32559	3.8861	24.373	7.93737e-07	6.66108e-06
	Cracdl	39	-1.4491	0.791384	17.3025	3.1877e-05	0.000125745								S100a6	650	-2.28857	2.46491	15.1169	0.000101053	0.000533908
	Scn11a	20	-1.4417	0.0199799	12.423	0.000424079	0.00134656								Treml4	96	-2.26308	0.45556	20.1028	7.33874e-06	5.0553e-05
	Gm15612	22	-1.43805	-0.0628931	11.0371	0.000893062	0.00263953								Hif3a	19	-2.21654	-0.371328	21.009	4.57129e-06	3.30672e-05
	Gm47112	21	-1.42746	-0.252464	10.3661	0.0012835	0.00364955								Zfp57	90	-2.21566	1.1146	30.1243	4.05221e-08	4.25016e-07
	Gm52117	31	-1.42351	-0.0837203	10.3542	0.00129178	0.00366959								Hbb-bt	100	-2.20619	0.912603	12.5091	0.000404972	0.00180301
	Steap1	7	-1.42179	-0.00415867	7.08514	0.0077726	0.0181657								Hpca	42	-2.1951	-0.191411	18.526	1.67606e-05	0.00010716
	Gm35117	81	-1.41885	1.50802	23.4642	1.2726e-06	6.27297e-06								Pilrb2	103	-2.19051	0.50772	17.938	2.28214e-05	0.000140697
	LOC118567681	16	-1.41031	-0.220027	8.86213	0.00291148	0.00759501								Anpep	1099	-2.18281	2.83468	7.16502	0.0074339	0.0222749
	Gm40128	33	-1.40949	-0.0199795	9.51843	0.00203419	0.00551888								Gm3764	143	-2.15579	1.89963	17.483	2.89886e-05	0.000175432
	Gm41055	23	-1.40336	-0.220125	11.1928	0.000821149	0.00244443								Kcnk1	46	-2.14846	0.782244	12.9346	0.000322558	0.00147985
	Gm15575	28	-1.39809	0.444121	14.0345	0.000179485	0.000615382								Hbb-bs	944	-2.14088	3.89731	12.5867	0.000388499	0.00173952
	Spats2l	14	-1.39419	-0.153731	11.2233	0.000807772	0.00240718								Gpr37l1	85	-2.12335	1.61806	24.2344	8.52967e-07	7.13276e-06
	Tmem262	24	-1.38502	-0.173863	9.39457	0.0021763	0.00587132								Qrfp	26	-2.12181	-0.401109	16.8351	4.07726e-05	0.000238681
	2500004C02Rik	160	-1.37178	2.61687	30.5953	3.17859e-08	1.94166e-07								Atp8b4	256	-2.11628	1.29485	13.2481	0.000272858	0.00127735
	Cfhr2	42	-1.34943	0.490077	12.4672	0.000414159	0.00131843								Sgms2	227	-2.08541	1.3326	17.4011	3.02657e-05	0.000181916
	Gm41662	39	-1.3371	0.792084	20.3437	6.47052e-06	2.87148e-05								Dnah6	31	-2.07612	0.174011	8.70549	0.00317253	0.0108242
	Gm30639	20	-1.33084	-0.132409	8.81565	0.00298658	0.00776645								Mmp9	740	-2.04279	2.91321	18.3983	1.79218e-05	0.000113762
	Nr6a1os	210	-1.32987	2.78185	47.6598	5.06983e-12	4.65494e-11								Cecr2	55	-2.02527	0.330403	27.6836	1.42872e-07	1.3705e-06
	Gm4925	21	-1.32319	-0.272881	8.66461	0.0032445	0.00835989								Slc7a10	54	-2.01101	1.43206	10.2521	0.00136526	0.00520677
	Pde10a	81	-1.32141	1.6703	20.2316	6.86088e-06	3.03388e-05								Scube3	48	-2.00117	0.483086	21.2083	4.11978e-06	3.00004e-05
	Gm34336	37	-1.29896	0.119548	7.09872	0.00771391	0.0180342								Sfrp1	28	-1.97501	0.0184114	10.6618	0.00109372	0.00430057
	Rgs4	28	-1.29758	1.23094	7.74087	0.00539848	0.0131252								Il2ra	53	-1.97144	-0.203046	10.9798	0.000921088	0.00370267
	Gm29975	31	-1.28796	0.436341	11.687	0.000629389	0.00192628								Enpp2	3805	-1.94903	7.26856	17.8411	2.40145e-05	0.000147474
	Tnfrsf25	28	-1.28104	0.485848	14.434	0.000145159	0.000507854								Crhr2	35	-1.94387	-0.30283	16.8537	4.03746e-05	0.000236869
	Ak5	25	-1.27275	-0.197169	7.01951	0.00806263	0.0187466								Gprc5c	89	-1.94358	0.520866	18.5972	1.61454e-05	0.000103555
	4930521O11Rik	10	-1.26592	-0.251215	7.59854	0.00584156	0.0140671								Clic6	202	-1.91923	3.11269	14.5258	0.000138254	0.00070239
	Xlr4a	65	-1.23449	1.76275	7.18059	0.00736966	0.017319								Pcdh7	64	-1.89779	0.0225501	16.8519	4.04122e-05	0.000236963
	Gm26641	24	-1.23139	-0.140877	6.68792	0.00970682	0.0220941								E130215H24Rik	39	-1.8893	0.222606	18.7787	1.46796e-05	9.53197e-05
	LOC118567660	39	-1.22489	0.522595	10.2298	0.00138189	0.0038944								Krt10	183	-1.88228	0.936201	11.0309	0.000896077	0.00361625
	Gm21992	33	-1.22314	0.0253344	8.92467	0.00281344	0.00736632								Kcne2	71	-1.88066	1.34693	10.572	0.00114815	0.00447157
	LOC115487911	24	-1.22009	-0.0222858	6.53683	0.0105664	0.0238179								Gm42372	25	-1.87901	-0.243797	16.7205	4.33107e-05	0.000251871
	4933431G14Rik	98	-1.21867	1.86759	12.9456	0.00032067	0.0010424								Hba-a1	724	-1.87785	3.65321	13.9988	0.000182931	0.000897777
	Dnase1l2	192	-1.21397	2.76213	31.5009	1.99352e-08	1.25107e-07								Mgst1	216	-1.87359	1.02035	7.97184	0.00475105	0.0152088
	Gm38565	34	-1.20653	1.32715	15.5235	8.14843e-05	0.000298162								Sh3d19	99	-1.87357	1.41871	18.8763	1.39473e-05	9.08565e-05
	Gm13710	129	-1.20225	1.37282	7.02155	0.00805345	0.0187282								Ltf	1220	-1.87099	3.42268	8.47408	0.00360242	0.0120584
	Gm24105	20	-1.20027	-0.0642366	8.58269	0.00339373	0.00870979								Cacnb3	155	-1.85912	0.706495	9.00839	0.00268744	0.00940736
	Gm13291	156	-1.19955	2.87915	24.0879	9.20343e-07	4.6144e-06								Sox17	150	-1.83346	1.01147	8.74989	0.0030962	0.0105894
	Gm4325	22	-1.19927	-0.206675	5.22231	0.0222989	0.045843								Adgre5	821	-1.828	3.10562	14.0404	0.000178922	0.000880029
	Casp12	80	-1.19571	1.57254	18.2963	1.89079e-05	7.7647e-05								Gm34655	52	-1.82799	0.168401	18.2884	1.89857e-05	0.000119657
	Phtf1os	28	-1.19069	0.267784	8.94764	0.00277829	0.00728635								Vat1l	67	-1.81548	2.2468	9.67064	0.00187236	0.00684904
	LOC118567509	31	-1.18045	0.707728	14.1537	0.000168467	0.000580275								S100a9	2194	-1.81515	4.43633	16.1145	5.96249e-05	0.000332401
	LOC118568020	30	-1.17564	0.146205	8.73045	0.00312939	0.0080997								Tlcd5	36	-1.80855	0.0372085	15.8608	6.81747e-05	0.000374168
	Gm14230	104	-1.174	2.31359	31.2626	2.25384e-08	1.40497e-07								Gja1	100	-1.80092	1.47049	13.9287	0.000189875	0.000927672
	Xlr4c	14	-1.17239	0.754752	5.73883	0.0165938	0.0354877								Gm13868	20	-1.79751	-0.0469458	15.9763	6.41399e-05	0.000354367
	Slc15a2	364	-1.16944	3.40238	6.09559	0.013552	0.0296992								Car12	141	-1.79626	2.27689	10.347	0.00129686	0.00498079
	Tmem181c-ps	90	-1.16673	1.93365	27.8883	1.28527e-07	7.27865e-07								Tctn2	45	-1.7782	0.392354	18.2373	1.95022e-05	0.000122638
	Gm35060	161	-1.16646	2.40608	27.3807	1.67092e-07	9.34551e-07								Htra1	209	-1.77209	1.71907	18.092	2.10478e-05	0.00013154
	Gm33864	249	-1.16342	3.0124	43.7326	3.76455e-11	3.19665e-10								Gm34346	44	-1.74838	0.491798	17.7044	2.58026e-05	0.000157635
	Xlr4b	161	-1.15433	2.51174	15.3024	9.16011e-05	0.000331923								Col8a2	72	-1.74474	1.30361	14.2314	0.000161655	0.000806507
	Kcnab1	15	-1.1459	0.243643	7.87433	0.00501414	0.0122829								Gria2	43	-1.73218	0.298177	12.8975	0.000329029	0.00150564
	Fgfbp3	102	-1.14272	1.82879	12.9538	0.000319269	0.00103876								Dsp	141	-1.72729	0.800141	9.29476	0.00229811	0.00823187
	Gm4598	27	-1.14162	0.0833443	8.99208	0.00271152	0.00713078								Npr3	39	-1.72582	0.47243	11.6306	0.000648758	0.00272139
	Gm15850	70	-1.13935	1.49433	17.4629	2.92972e-05	0.000116307								Ovol1	113	-1.71431	1.49977	27.3997	1.65456e-07	1.568e-06
	Tbx6	310	-1.13486	3.91086	38.6472	5.07759e-10	3.82577e-09								Tmem53	25	-1.70544	-0.0309044	15.1776	9.78595e-05	0.000518194
	Mmp23	156	-1.12315	2.85635	30.4607	3.40706e-08	2.07104e-07								Lrrk2	158	-1.7025	1.37319	13.4632	0.000243289	0.00115591
	Olfr1029	23	-1.12102	0.355343	9.77657	0.0017675	0.00485183								Vldlr	41	-1.69549	0.478539	8.90587	0.00284256	0.00986736
	Gm31560	25	-1.11572	-0.254419	5.31653	0.0211241	0.0436745								Gm33858	1291	-1.6929	5.65162	38.1154	6.66817e-10	9.28622e-09
	Pcdhgb8	86	-1.11541	1.60709	17.6742	2.62158e-05	0.000104828								Epha2	1764	-1.69136	5.44282	91.9523	8.87901e-22	4.74072e-20
	Fbxo24	58	-1.11412	1.58187	19.4411	1.03752e-05	4.46479e-05								Stard13	87	-1.68916	0.834261	14.417	0.000146475	0.000738325
	Ankrd24	441	-1.11352	4.30442	72.817	1.42247e-17	2.00667e-16								Fgfr3	109	-1.68567	1.58741	14.1602	0.000167881	0.000833746
	Gm2956	211	-1.11277	3.1087	50.8536	9.9518e-13	9.83375e-12								Sntb1	34	-1.68457	-0.139624	10.4417	0.00123199	0.00475619
	Doc2g	73	-1.11195	1.94484	18.2686	1.91841e-05	7.86946e-05								Pla2g7	1530	-1.66497	3.87434	12.775	0.000351277	0.00159353
	Cpsf4l	86	-1.10961	1.74513	14.3658	0.000150509	0.000524356								Gm3317	190	-1.66029	1.26973	12.4487	0.000418277	0.00185117
	Tmem72	29	-1.10382	1.34106	6.38678	0.0114973	0.0256911								Sema3b	48	-1.65678	0.792158	12.7925	0.000348012	0.00158075
	Srp54b	177	-1.10327	2.94585	9.87571	0.00167475	0.00462106								Nfe2	55	-1.65615	-0.0904623	10.9448	0.000938687	0.00376246
	Cd59a	13	-1.09616	0.704329	6.32151	0.0119282	0.0265266								Hes1	382	-1.64706	3.20784	45.2602	1.72517e-11	3.00608e-10
	Ttll3	1000	-1.09596	5.5364	47.7423	4.86089e-12	4.46861e-11								Klhdc7a	28	-1.64395	0.541541	11.3411	0.000758104	0.00312632
	1700040D17Rik	20	-1.08606	0.161984	8.31605	0.00392963	0.00991617								Sdc2	77	-1.64283	0.74376	13.8328	0.000199822	0.000969242
	Zfp69	1083	-1.08175	5.6626	61.2092	5.13223e-15	6.21663e-14								Fbn1	48	-1.63888	-0.189428	10.1024	0.00148074	0.00558844
	Zfr2	53	-1.08088	1.8342	17.0869	3.57082e-05	0.000139639								Prr22	21	-1.63132	0.0346758	12.113	0.00050072	0.00216693
	Gm22573	21	-1.07196	-0.0666588	5.7227	0.0167469	0.0357449								Gm21188	58	-1.6215	-0.175991	6.6369	0.00998876	0.0286385
	Gm7285	89	-1.06384	2.16194	19.2972	1.1187e-05	4.77744e-05								Iho1	117	-1.61024	1.88437	18.9682	1.32913e-05	8.69834e-05
	Pnp	3197	-1.06366	7.05044	145.559	1.62053e-33	5.73959e-32								Trpm3	346	-1.60852	4.00249	9.30633	0.00228363	0.00818625
	Sigirr	21	-1.06247	0.316767	7.73957	0.00540236	0.0131325								Kcnc3	41	-1.60666	0.383639	16.5734	4.68018e-05	0.00026875
	Rac3	228	-1.06071	3.19568	45.1331	1.84089e-11	1.60336e-10								Pf4	827	-1.60658	3.57376	22.1045	2.58209e-06	1.96208e-05
	6030468B19Rik	467	-1.05814	3.86091	35.392	2.69598e-09	1.86369e-08								LOC118568291	30	-1.60336	0.155368	13.9659	0.000186155	0.000912335
	Rap1gap2	1284	-1.05802	5.67849	147.119	7.39067e-34	2.64274e-32								Slc6a1	87	-1.59722	1.75382	9.22973	0.00238117	0.00847248
	Ccl7	53	-1.0565	1.47095	14.2561	0.000159541	0.000552338								Csrp2	46	-1.59568	-0.116864	11.2514	0.000795621	0.00326202
	Slc2a5	10408	-1.05624	8.83884	140.501	2.06858e-32	6.90037e-31								Gm20337	21	-1.59462	-0.157172	12.3124	0.000449969	0.00197415
	Timd4	22	-1.05471	0.413319	7.0977	0.00771828	0.0180416								Gm8339	39	-1.58934	-0.400932	7.88774	0.00497711	0.0158356
	Marchf10	107	-1.05021	2.38205	21.8013	3.02392e-06	1.41569e-05								Tgfbr3	74	-1.58899	0.865324	14.893	0.000113784	0.000591235
	Cspg4b	11	-1.0489	0.263414	5.64446	0.0175106	0.0371252								Gm31940	31	-1.5846	0.148985	11.317	0.000768005	0.00315887
	Slc16a9	67	-1.04855	1.89482	17.8348	2.4094e-05	9.69941e-05								Pglyrp1	127	-1.57992	0.866401	11.3091	0.000771267	0.00316952
	3110056K07Rik	320	-1.04599	3.4619	30.1035	4.09585e-08	2.4676e-07								Abca4	66	-1.57851	1.59578	8.10913	0.00440429	0.014305
	Gm33387	39	-1.04582	0.8746	9.93454	0.00162206	0.0044898								LOC115487644	40	-1.57757	0.0380431	14.4288	0.000145561	0.000733977
	Gm36685	57	-1.04549	1.41164	17.0107	3.71706e-05	0.000144978								Cfap65	26	-1.57743	0.0477013	6.01998	0.0141448	0.0382083
	Gm41665	30	-1.04254	0.238545	7.2123	0.00724056	0.0170559								Ahnak	2704	-1.57692	4.81821	16.0753	6.08743e-05	0.000338699
	Gm2921	32	-1.04114	0.294678	8.13658	0.00433811	0.0108007								Col4a4	27	-1.57383	0.159998	7.91975	0.0048898	0.0155894
	Txnip	9176	-1.03963	8.64282	122.57	1.73167e-28	4.71184e-27								9930012K11Rik	105	-1.56986	1.64307	26.0354	3.35212e-07	3.00755e-06
	9330136K24Rik	45	-1.03587	0.461899	7.18435	0.00735424	0.0172855								Lcat	27	-1.56478	-0.0924485	14.0375	0.0001792	0.000880994
	Btbd3	632	-1.02939	4.81217	77.2099	1.53723e-18	2.32471e-17								Gm39715	21	-1.56459	-0.310847	12.5303	0.000400397	0.00178622
	Trim15	43	-1.02696	0.922893	11.6641	0.000637179	0.00194612								Sirpb1a	57	-1.56422	-0.13503	5.97013	0.0145502	0.039087
	LOC118567382	104	-1.02483	2.19074	14.3189	0.000154306	0.000536207								Sox13	198	-1.56352	1.76295	17.7935	2.4622e-05	0.000150943
	4930568A12Rik	46	-1.0247	0.970825	11.4372	0.000719876	0.00217333								Gm52823	37	-1.56305	-0.132301	12.6806	0.000369477	0.00166541
	Adgrg1	17861	-1.01924	9.55856	166.897	3.52293e-38	1.48812e-36								Alpl	174	-1.56298	1.12027	7.09779	0.0077179	0.0229799
	Clec4e	27	-1.01837	0.1593	6.59454	0.0102292	0.0231278								Mcemp1	183	-1.56242	0.906189	6.1415	0.0132046	0.0361096
	Inka1	1045	-1.01784	5.31991	91.3685	1.19257e-21	2.17922e-20								Rasgrp2	218	-1.56157	1.7784	16.8638	4.01606e-05	0.000235977
	Gm46162	6564	-1.01726	8.08053	92.6275	6.31253e-22	1.18398e-20								S100a8	1293	-1.56039	3.68867	8.87461	0.00289164	0.0100058
	Zfp691	1963	-1.01533	6.30651	143.362	4.89911e-33	1.69885e-31								Cgnl1	333	-1.559	2.57759	15.845	6.87483e-05	0.000376585
	Gm32849	1289	-1.01328	5.60348	66.935	2.80602e-16	3.65101e-15								Cyp2d22	102	-1.55531	1.24047	22.5017	2.09953e-06	1.6171e-05
	Dapp1	2425	-1.01028	6.7529	106.58	5.50362e-25	1.23964e-23								Frem1	18	-1.5513	0.446282	7.27062	0.00700918	0.0211817
	Mkrn3	64	-1.0062	1.19639	9.26829	0.00233155	0.00623138								Prlr	203	-1.54889	2.90385	7.67264	0.00560643	0.0175072
	Sapcd1	53	-1.00505	0.761166	8.56487	0.00342711	0.00878336								Rnd3	78	-1.54869	0.446325	12.3254	0.000446825	0.00196278
	Gm51749	27	-1.00418	-0.135108	6.46835	0.0109812	0.024645								Ntn4	93	-1.54604	0.453238	6.94452	0.00840765	0.0246345
	LOC118568402	1126	-1.00396	5.66564	71.7702	2.41781e-17	3.36935e-16								Omg	27	-1.54505	0.00522922	10.624	0.00111632	0.00437528
	Tmc7	989	-1.00375	5.38803	103.746	2.3002e-24	5.02907e-23								Ppp1r1b	118	-1.54052	2.08528	9.70164	0.00184104	0.00674666
	Gm51644	161	-1.00266	3.04198	24.5488	7.24505e-07	3.6921e-06								4930445E18Rik	67	-1.5382	1.00478	19.9022	8.15071e-06	5.56048e-05
	Gm35816	110	-1.00243	2.09105	16.4935	4.8817e-05	0.000186883								1110006O24Rik	46	-1.53049	0.641132	16.1375	5.89068e-05	0.000329305
	Trmt10a	394	-1.00086	3.80992	42.918	5.70826e-11	4.77375e-10								Slc38a11	116	-1.53047	0.685599	5.90448	0.0151024	0.0403177
	Plxna4	2095	-1.00029	6.62252	108.142	2.5018e-25	5.76573e-24								Ryr1	27	-1.52973	-0.37091	8.9505	0.00277393	0.0096647
	Kif11	57	1.0005	2.09494	16.8813	3.97928e-05	0.0+A1:G134301545516		395						Mapk11	45	-1.52973	-0.101262	13.3627	0.000256685	0.0012093
	Kcnma1	489	1.00097	5.27721	89.8367	2.58657e-21	4.64119e-20								Plac8	218	-1.52101	1.69912	10.6757	0.00108553	0.0042712
	Impdh1	72	1.00193	2.96967	21.6891	3.20607e-06	1.49486e-05								Syn1	36	-1.52065	-0.0241215	13.9145	0.000191314	0.00093406
	Hmgcs1	554	1.00195	5.57986	108.542	2.0442e-25	4.74045e-24								Gm29941	140	-1.51947	2.28244	22.2063	2.44863e-06	1.86467e-05
	Shcbp1	16	1.003	-0.0243521	5.50589	0.0189525	0.0397966								Myrip	83	-1.51854	0.843542	12.2437	0.00046682	0.00203232
	Itprip	205	1.0061	4.09567	55.3464	1.01055e-13	1.0864e-12								L3mbtl1	30	-1.51652	0.138296	10.7324	0.00105273	0.00415601
	Ptges3l	15	1.00762	0.296198	7.4037	0.00650898	0.0154868								Dancr	70	-1.51376	1.03889	16.586	4.6493e-05	0.000267411
	Tmem120b	153	1.00866	3.67536	60.321	8.05812e-15	9.63252e-14								Ccdc80	51	-1.51328	0.593945	16.0301	6.23422e-05	0.000346049
	Fam162a	150	1.01024	3.6739	49.0796	2.45781e-12	2.33727e-11								Ahr	141	-1.51316	1.08911	13.0558	0.000302348	0.00139756
	Spc25	9	1.01298	0.350798	8.19975	0.00418961	0.0104943								Zfp507	77	-1.51196	0.721449	14.7193	0.000124765	0.000641461
	Akr1a1	4437	1.01349	8.54176	95.7008	1.33628e-22	2.62175e-21								Trim9	34	-1.5082	0.317916	13.5677	0.000230108	0.00109845
	Grhl1	6	1.01361	-0.0339607	6.20215	0.0127595	0.0281237								Hr	61	-1.50549	0.489459	13.4456	0.000245581	0.00116641
	Kif1c	694	1.01741	6.21519	101.505	7.12718e-24	1.51387e-22								Gucy1b1	60	-1.49699	0.184915	8.31814	0.00392511	0.0130031
	Tmsb10	738	1.01846	5.9136	89.9514	2.44078e-21	4.40078e-20								Erp27	20	-1.49388	-0.389253	10.5681	0.00115058	0.00447921
	Rpl15	2320	1.01883	7.58665	89.1433	3.6723e-21	6.50329e-20								Relt	538	-1.49103	3.5645	38.491	5.50059e-10	7.78278e-09
	Rpl7a	858	1.01927	6.59696	61.8379	3.72932e-15	4.55429e-14								Gm5296	34	-1.49033	0.0452079	10.7022	0.00107006	0.00421501
	Srebf1	1144	1.01955	6.56335	167.526	2.56747e-38	1.0876e-36								4930430E12Rik	257	-1.48507	1.26787	5.77709	0.0162364	0.0428148
	Mapk8ip1	65	1.02011	2.84773	15.4777	8.34838e-05	0.000304955								Gm52681	58	-1.47969	1.15138	13.9042	0.000192368	0.000938556
	Zfp704	512	1.02032	5.54945	134.934	3.41406e-31	1.065e-29								Slc38a3	153	-1.4771	2.04713	9.91326	0.00164092	0.00611788
	Bik	33	1.02039	1.43381	9.56238	0.00198605	0.00539811								Gata2	126	-1.47521	0.704155	6.56753	0.0103856	0.0295844
	Clec9a	32	1.02043	1.06319	12.2317	0.000469834	0.00147675								Dnajb7	37	-1.47487	0.401019	14.2636	0.000158904	0.000794818
	Metrnl	93	1.02056	3.08873	29.8479	4.67313e-08	2.79507e-07								Cdc42ep1	72	-1.47421	0.755977	16.0823	6.06474e-05	0.000337641
	Gm15860	22	1.02479	0.570681	9.97323	0.00158833	0.00440624								Gpm6a	136	-1.47213	2.40126	10.4901	0.00120019	0.00464736
	Srxn1	68	1.02594	2.94125	34.4894	4.28573e-09	2.89762e-08								Dock5	182	-1.47093	1.30942	10.5334	0.00117234	0.00455698
	Gm34931	16	1.02749	0.0101807	6.62783	0.0100398	0.0227553								Bmp7	42	-1.46551	-0.075922	8.0228	0.00461922	0.014881
	Atp1a1	4519	1.02857	8.75828	113.597	1.59665e-26	3.92217e-25								Cachd1	47	-1.46386	0.32571	9.85365	0.00169495	0.00628126
	Mir682	176	1.02979	3.23792	5.82083	0.0158375	0.0340474								Otx2	53	-1.4525	0.9005	8.91914	0.00282198	0.00980795
	Arhgap10	9	1.03201	1.18474	9.21976	0.00239417	0.00638061								Gm16124	67	-1.45066	1.11773	16.2014	5.69522e-05	0.000319768
	Nrbf2	374	1.03267	4.88907	92.2708	7.55901e-22	1.40715e-20								Sptb	70	-1.44937	0.880038	14.5156	0.000139004	0.000705189
	Sec61g	153	1.03349	3.84022	33.4091	7.46757e-09	4.92913e-08								Ccdc88c	133	-1.44769	1.39618	13.2203	0.000276936	0.00129276
	Camk2n2	25	1.03413	0.94576	8.0211	0.00462354	0.0114142								Ccdc125	127	-1.44374	1.70516	22.6024	1.99238e-06	1.54129e-05
	Siva1	83	1.03497	3.18399	35.8375	2.14483e-09	1.50008e-08								Zic1	29	-1.44152	0.122942	8.63864	0.00329107	0.0111667
	4930487H11Rik	13	1.03553	0.574323	10.3806	0.00127344	0.00362372								Fxyd1	31	-1.43929	0.634115	8.78091	0.00304399	0.0104512
	Rpl37rt	183	1.03816	4.13904	21.4095	3.70931e-06	1.71025e-05								4930481B07Rik	35	-1.43839	-0.125904	12.4931	0.000408466	0.00181399
	Nmb	33	1.03875	1.50586	16.2855	5.448e-05	0.00020639								Slc4a5	67	-1.43811	1.56747	6.92055	0.00852109	0.0249359
	Adamts17	10	1.0405	0.0882961	5.51289	0.0188768	0.0396719								Rasl2-9	88	-1.43424	1.56396	17.2439	3.28758e-05	0.000196519
	Adam8	97	1.04189	3.39011	35.4921	2.5609e-09	1.77442e-08								Ly6m	45	-1.43344	1.09357	13.2396	0.000274099	0.00128164
	Lrp11	32	1.04257	1.86934	17.8729	2.36161e-05	9.54308e-05								Krt8	44	-1.43319	0.223044	13.6751	0.000217317	0.00104356
	Slc25a24	20	1.04515	1.02589	11.125	0.00085174	0.00252893								Eln	166	-1.43145	1.14698	6.35361	0.0117143	0.0327058
	Rpl10-ps6	6	1.04548	-0.0810601	5.8564	0.0155205	0.0334238								Chp2	128	-1.43038	2.00041	16.6167	4.57453e-05	0.000263753
	Pacsin3	15	1.04697	1.04588	11.6815	0.000631233	0.00193113								C030005K06Rik	29	-1.42972	-0.180812	12.7845	0.000349501	0.00158616
	Tbc1d4	527	1.047	5.50816	141.123	1.51229e-32	5.07876e-31								Dab2ip	321	-1.42645	2.52111	23.3085	1.37987e-06	1.10491e-05
	Kif21a	16	1.0471	1.19841	9.07069	0.00259739	0.00686087								Pdzd2	80	-1.42518	0.965975	12.3268	0.000446504	0.00196198
	Atp5e	462	1.04734	5.57671	53.9378	2.06941e-13	2.16085e-12								Gm46916	80	-1.42517	1.57611	13.4235	0.000248491	0.00117746
	Rgs3	366	1.05085	4.99082	69.6948	6.9229e-17	9.41856e-16								Plekhg3	320	-1.42417	2.45551	17.3611	3.0908e-05	0.000185619
	Dok4	34	1.05189	1.82078	23.0294	1.59543e-06	7.74901e-06								Vav3	150	-1.42124	0.901082	7.03032	0.00801409	0.0236824
	Gm14303	39	1.05421	2.15615	11.1881	0.00082323	0.00245014								Ms4a14	178	-1.42048	1.99403	14.6749	0.000127739	0.000655086
	Gm11478	9	1.05422	0.281674	6.33304	0.0118509	0.0263902								Cpne2	278	-1.41936	2.16536	13.5602	0.000231034	0.0011025
	AI504432	291	1.05479	4.53752	58.5113	2.02131e-14	2.3292e-13								Gm5953	28	-1.41883	0.384928	11.0977	0.000864344	0.00350318
	Mfge8	353	1.05595	5.42316	54.9966	1.2074e-13	1.28689e-12								S1pr5	68	-1.41115	0.571097	9.2707	0.00232849	0.00831125
	Lyplal1	59	1.05764	1.99726	22.3276	2.29876e-06	1.0921e-05								Coro2b	42	-1.40782	0.769134	10.5145	0.00118442	0.00459512
	Nuf2	31	1.0629	1.12138	14.0745	0.000175707	0.000603401								Serpinb8	117	-1.40731	1.29392	13.2477	0.000272911	0.00127735
	Xdh	123	1.06597	3.53192	29.1795	6.59737e-08	3.86992e-07								Cnga2	28	-1.40649	0.160917	12.2945	0.000454295	0.00198758
	Prxl2a	92	1.06598	3.59064	39.9658	2.58445e-10	2.02187e-09								Dscc1	47	-1.40582	0.0854678	11.3572	0.000751563	0.00310297
	Mapkapk2	2072	1.06737	7.48188	156.948	5.25378e-36	2.08349e-34								Hhip	21	-1.40466	-0.0709781	8.7692	0.0030636	0.0104953
	COX1	55470	1.06775	12.2817	73.3801	1.06937e-17	1.52733e-16								Bnip5	47	-1.40432	0.466972	10.6114	0.0011239	0.00439647
	Snrpg	203	1.06955	4.14334	41.4088	1.23498e-10	9.9809e-10								Ltbp4	986	-1.4027	3.49386	5.90245	0.0151199	0.0403489
	Guca1a	79	1.06976	2.57436	20.7938	5.11481e-06	2.31463e-05								Cd93	1025	-1.39953	3.70824	16.7613	4.23897e-05	0.000247023
	Tpt1	12521	1.07119	10.0455	79.8527	4.03391e-19	6.35831e-18								Myorg	43	-1.39875	0.138269	6.33993	0.011805	0.032925
	Ahcy	101	1.07314	3.39657	56.7486	4.95245e-14	5.48111e-13								Gm36338	28	-1.39556	0.726552	8.20273	0.00418273	0.0137248
	Plin3	200	1.07345	4.15074	52.6897	3.90643e-13	3.98146e-12								Gm41926	39	-1.39447	0.239387	12.3113	0.000450232	0.00197468
	Gm2223	25	1.07492	1.72766	20.7372	5.26833e-06	2.37999e-05								Slit1	33	-1.39395	0.186217	6.38282	0.011523	0.0322914
	Gm16477	55	1.07518	1.87692	22.7272	1.86706e-06	8.97186e-06								LOC100861738	275	-1.39388	3.18526	27.4673	1.59771e-07	1.51922e-06
	Cox6b1	600	1.07535	5.66885	86.1509	1.66713e-20	2.82164e-19								Uchl1	57	-1.39184	0.232653	8.88893	0.00286904	0.00994175
	COX2	148	1.07549	3.93615	36.9214	1.22988e-09	8.82521e-09								Gm1604a	26	-1.39166	0.159764	10.1647	0.00143152	0.00543165
	Rpl35a	2123	1.07695	7.43895	25.9633	3.47978e-07	1.85178e-06								Traf1	164	-1.39108	0.96678	6.38559	0.0115051	0.0322667
	Plscr1	58	1.07766	2.38716	26.5852	2.52167e-07	1.36531e-06								Gnai1	42	-1.39017	0.149143	10.181	0.00141894	0.00538537
	Brdt	12	1.07849	0.945483	11.9513	0.000546102	0.00169221								Col18a1	138	-1.38965	1.13099	8.88245	0.00287924	0.00997268
	Timeless	143	1.07894	3.04837	24.6861	6.74693e-07	3.4465e-06								Acacb	70	-1.38754	0.697741	6.65913	0.00986491	0.0283236
	Pgm1	460	1.07931	5.17183	115.148	7.30248e-27	1.82086e-25								Unc13b	395	-1.38569	3.49933	40.3096	2.16747e-10	3.26597e-09
	P4htm	12	1.08077	0.471423	9.09991	0.00255622	0.00676171								Gm9861	77	-1.38545	1.31844	16.3995	5.12987e-05	0.000290912
	Itgal	189	1.08246	3.89809	26.6115	2.48765e-07	1.34787e-06								Erbb3	39	-1.38064	0.103683	9.81557	0.00173041	0.00639424
	Phldb1	363	1.08508	5.14953	75.5645	3.5366e-18	5.20576e-17								Slc28a2	47	-1.3788	0.330836	12.8744	0.000333107	0.00152282
	Ndufa2	348	1.08762	5.0701	46.4209	9.53904e-12	8.54274e-11								Prelp	85	-1.37565	1.48524	7.99934	0.00467944	0.0150339
	Eif3k	782	1.08883	6.07549	98.7441	2.87326e-23	5.90941e-22								E230001N04Rik	33	-1.37464	-0.0121625	12.3398	0.000443397	0.00195075
	Ssr4	1373	1.09043	6.91332	106.951	4.56339e-25	1.03727e-23								Gm22157	31	-1.3732	0.475139	10.6045	0.0011281	0.00440926
	Mtmr11	91	1.091	2.89047	35.3222	2.79436e-09	1.92901e-08								Ifitm6	81	-1.37255	0.565877	11.1686	0.000831922	0.0033873
	Tmem107	12	1.09297	0.515015	11.5993	0.000659763	0.00201057								Olfm1	295	-1.37118	2.17992	12.4728	0.000412916	0.00183031
	Limch1	4	1.09363	1.41165	5.69327	0.0170301	0.0362713								Ccdc8	76	-1.37096	1.10184	16.4807	4.91474e-05	0.000280398
	6330403K07Rik	11	1.09378	0.279074	9.74244	0.00180062	0.00493639								Col23a1	29	-1.37042	-0.214744	11.6287	0.000649427	0.00272259
	Rpl8	4095	1.09486	8.57332	102.145	5.16005e-24	1.10389e-22								Gm32738	44	-1.36853	0.0818433	10.2452	0.00137039	0.0052221
	Gprc5b	26	1.09501	2.40753	8.44464	0.0036612	0.00930336								Bcan	160	-1.36849	2.65421	9.46061	0.00209931	0.00758701
	Rps17	1976	1.09664	7.45601	60.3201	8.06209e-15	9.63252e-14								Gm16193	30	-1.36583	-0.0981768	11.3824	0.000741427	0.00306805
	Cops9	322	1.09708	4.86488	44.6516	2.3541e-11	2.03255e-10								Gm3740	19	-1.36499	-0.231771	10.4552	0.00122307	0.00472431
	Rps11-ps1	16	1.09879	0.229582	7.3071	0.00686826	0.0162436								Kcnj13	169	-1.36378	2.80567	8.56614	0.00342472	0.0115565
	Rps10-ps1	69	1.09924	2.19319	19.3553	1.0852e-05	4.65384e-05								Pdlim7	319	-1.36304	1.63447	5.53517	0.018638	0.0479831
	Micos13	224	1.10088	4.44624	53.3474	2.79485e-13	2.88801e-12								LOC118567393	80	-1.36036	1.41357	12.7933	0.000347855	0.00158054
	Nectin3	4	1.10219	0.213795	5.12253	0.0236172	0.0482339								St6galnac2	44	-1.35779	0.328559	8.68293	0.00321204	0.0109432
	TrnP	165	1.10261	3.8136	53.3289	2.82131e-13	2.91334e-12								Bcam	386	-1.35676	2.24422	7.96986	0.00475626	0.015222
	H2ac18	10	1.10271	0.576251	9.46212	0.00209759	0.00567232								Gm38709	87	-1.35653	1.5211	14.9935	0.000107885	0.000564142
	Ddhd1	411	1.10274	5.24389	143.786	3.95651e-33	1.3784e-31								Aifm3	48	-1.35536	0.888955	10.1325	0.00145678	0.00551215
	Rab36	28	1.10319	1.53538	17.6418	2.66657e-05	0.000106484								Acsl6	39	-1.35336	1.35247	7.02137	0.00805426	0.0237763
	Gm4737	26	1.10353	1.20025	13.5769	0.000228982	0.000768306								A930033H14Rik	150	-1.35226	2.44506	20.3438	6.4702e-06	4.52083e-05
	Gm19582	15	1.10542	0.284896	10.6512	0.00110002	0.00317569								Gm36161	102	-1.34913	0.634176	5.91899	0.0149786	0.0400627
	Cox6c	477	1.10739	5.39514	83.1538	7.59113e-20	1.25073e-18								Pcp4l1	241	-1.34608	2.30985	13.3374	0.000260169	0.00122297
	Ercc6	411	1.10808	5.24383	132.96	9.22412e-31	2.81846e-29								Dnah2	97	-1.34434	1.53077	16.1445	5.86901e-05	0.000328353
	Adgrg5	4	1.10977	0.207688	7.20503	0.00726997	0.017109								Slco1a4	249	-1.34308	2.09771	5.83452	0.0157147	0.0416146
	Ctla2b	312	1.11196	4.64902	77.3905	1.4029e-18	2.12804e-17								Cbs	39	-1.33678	0.27031	11.3789	0.000742834	0.00307231
	COX3	108	1.11197	3.28098	47.8021	4.71488e-12	4.3415e-11								Arhgap27os3	381	-1.33144	3.58902	35.0041	3.29012e-09	4.10149e-08
	Gdf15	9	1.11261	1.20358	8.56394	0.00342887	0.00878637								Kdm6b	1530	-1.32939	5.32506	99.8794	1.61968e-23	1.04643e-21
	Afdn	366	1.11435	5.34592	96.5932	8.51423e-23	1.69049e-21								Nrxn2	75	-1.32618	1.01485	11.9216	0.000554861	0.00237326
	Pcdhgb6	32	1.11451	1.61521	22.0646	2.63632e-06	1.24399e-05								Epor	65	-1.32612	0.867444	13.9388	0.000188856	0.000923333
	Abtb2	7	1.11575	0.188702	7.56449	0.00595294	0.0143145								Slco1c1	301	-1.32263	2.763	16.0131	6.29049e-05	0.000348626
	Rpl27	2190	1.11618	7.59953	49.7887	1.71229e-12	1.65469e-11								Tlr8	478	-1.32251	2.93997	15.2946	9.19777e-05	0.000489245
	Slamf7	117	1.11896	3.37995	49.5377	1.94592e-12	1.8744e-11								Dnm1	38	-1.32168	0.306952	10.6253	0.00111553	0.00437462
	Htatip2	92	1.11957	3.0035	43.2421	4.83677e-11	4.06087e-10								Il6	204	-1.31982	2.3923	20.2245	6.88636e-06	4.77155e-05
	Nrcam	3	1.12137	0.505492	5.35563	0.0206555	0.0428126								LOC118568401	65	-1.3184	1.12795	14.4761	0.000141946	0.000718307
	Mxra7	61	1.12159	2.7253	36.961	1.20516e-09	8.66028e-09								Itga3	56	-1.30427	0.284939	8.16612	0.00426802	0.0139529
	Gys1	156	1.12262	4.09899	80.742	2.57191e-19	4.11478e-18								Gnb4	110	-1.30424	1.13881	13.3825	0.000253979	0.00119875
	AI507597	15	1.12287	-0.146513	7.53575	0.00604866	0.0145143								Gm35358	24	-1.3037	-0.143201	9.76779	0.00177595	0.00654545
	Rpl18	3183	1.12389	8.11181	67.2419	2.40152e-16	3.1384e-15								Gm16578	28	-1.30278	0.22231	11.1894	0.000822663	0.0033525
	3110082I17Rik	176	1.12532	3.88068	59.8271	1.03565e-14	1.22755e-13								Palld	246	-1.30263	1.83488	10.7115	0.00106473	0.00419752
	Mmp19	19	1.12823	0.937271	13.5385	0.000233719	0.00078279								Lamb1	49	-1.30191	0.588085	10.3054	0.00132641	0.00507501
	Gm12758	11	1.1314	0.143412	9.46757	0.00209136	0.00565696								Epn3	35	-1.29935	0.702102	7.20125	0.0072853	0.0218816
	Gm13394	13	1.13413	0.466179	10.5272	0.0011763	0.00336851								Pi16	60	-1.29649	0.157211	8.49195	0.0035672	0.0119659
	Fdft1	198	1.13477	4.1254	90.1584	2.19837e-21	3.98782e-20								Gm5915	29	-1.2953	-0.259654	9.9039	0.00164929	0.00614424
	Gm16418	24	1.1379	0.913401	9.76943	0.00177438	0.00486714								Gm52503	164	-1.29028	2.55026	17.5702	2.76889e-05	0.000168358
	Acot11	62	1.13846	2.68205	28.6338	8.74403e-08	5.04575e-07								Heg1	313	-1.28883	2.63847	18.0341	2.16978e-05	0.000135005
	Coq7	85	1.13886	2.95477	36.555	1.48416e-09	1.05634e-08								Gm31003	5731	-1.28324	7.54826	72.8335	1.41065e-17	5.13094e-16
	Cox8a	1034	1.13902	6.57906	103.417	2.71561e-24	5.89409e-23								Gm3704	68	-1.28232	1.66378	11.1517	0.000839559	0.00341348
	Septin3	16	1.14826	0.817836	9.09405	0.00256442	0.00678102								LOC118568585	26	-1.28194	0.114697	6.60763	0.0101543	0.02903
	Ssx2ip	202	1.15046	4.04449	80.5274	2.86696e-19	4.56235e-18								Mpdz	39	-1.2806	0.0445933	5.90968	0.0150579	0.0402292
	Gramd3	55	1.15527	2.12013	27.5736	1.51231e-07	8.50303e-07								Hbegf	117	-1.28007	1.32753	12.7089	0.000363917	0.00164297
	Mapk8ip2	11	1.15681	0.191388	6.27775	0.0122263	0.0271195								Pygm	105	-1.27978	1.88659	12.3047	0.000451821	0.0019792
	Tmem26	10	1.15702	0.59979	12.8507	0.000337357	0.00109164								LOC118567707	87	-1.27968	1.38147	11.6841	0.000630363	0.00265352
	Gcat	32	1.15791	1.63231	23.1543	1.49508e-06	7.29248e-06								Cav2	491	-1.2796	3.32359	26.022	3.37547e-07	3.02467e-06
	Melk	14	1.15798	0.380427	9.40752	0.00216098	0.00583421								Gm39487	71	-1.279	1.43501	13.9727	0.00018548	0.000909655
	Mpped1	8	1.15816	-0.00796648	7.36275	0.00665889	0.0158006								Pim1	1428	-1.27641	3.93358	9.50974	0.00204384	0.00740925
	ND4L	23	1.1608	1.32029	15.2584	9.37584e-05	0.000339163								LOC118567944	44	-1.27522	0.436831	11.0361	0.00089356	0.00360919
	Lsp1	1479	1.16225	7.06402	63.895	1.31229e-15	1.64433e-14								Spint2	125	-1.27483	1.65771	8.43606	0.00367852	0.012284
	Cdnf	15	1.16261	0.271664	11.5328	0.000683781	0.00207909								Gm39173	189	-1.27481	2.50198	16.2815	5.45929e-05	0.000307866
	Hsd17b7	112	1.1627	2.67902	24.1811	8.76883e-07	4.41339e-06								Nat1	78	-1.26896	0.965054	13.8566	0.000197298	0.000959962
	Cox4i1	1898	1.1628	7.47263	94.2221	2.82034e-22	5.43334e-21								Gm13840	76	-1.26896	1.26727	15.1081	0.000101529	0.000536153
	Tmem160	351	1.16281	4.96219	53.1296	3.12249e-13	3.21543e-12								Gm10406	12	-1.26566	0.237761	6.63285	0.0100115	0.0286805
	Sacs	104	1.16412	3.53705	53.4992	2.587e-13	2.68252e-12								Map7d3	32	-1.26441	0.245341	10.4654	0.00121634	0.0047009
	Rps8	3018	1.16596	8.14684	80.707	2.61788e-19	4.18384e-18								Spata33	25	-1.26295	-0.0790563	10.3943	0.00126408	0.00486944
	Prdx1	1269	1.16711	6.93961	118.175	1.58768e-27	4.08875e-26								Gm50587	101	-1.26264	1.66336	15.0441	0.000105027	0.000551402
	Atp5mpl	207	1.16839	4.47007	61.2824	4.94492e-15	5.99461e-14								Cyb561	59	-1.26208	1.31559	7.06088	0.00787852	0.0233745
	Msantd3	1	1.17016	-0.102721	6.06245	0.0138086	0.0301597								Ndrg4	61	-1.25805	0.914436	5.56767	0.0182951	0.0472799
	Nphp1	57	1.17051	2.85582	28.6094	8.85517e-08	5.10593e-07								Thra	643	-1.2579	4.24754	49.9304	1.59294e-12	3.1879e-11
	Brsk1	19	1.17623	1.32802	10.0632	0.00151264	0.00422457								Gjb6	34	-1.25778	0.0533229	7.2316	0.00716312	0.0215799
	Gm5905	8	1.17884	-0.0581601	8.48053	0.00358967	0.00914654								Gm10614	18	-1.25756	0.338025	5.67784	0.0171805	0.0449033
	Gm36048	10	1.17916	-0.0879246	7.89652	0.00495299	0.012151								LOC115488283	42	-1.2571	1.67146	9.87885	0.0016719	0.00621373
	ATP6	137	1.18223	3.33488	39.2961	3.64176e-10	2.79333e-09								Gm13547	15	-1.25444	-0.0989009	6.88924	0.00867162	0.025277
	Enah	15	1.18509	2.17903	11.4954	0.000697703	0.00211538								Kank1	71	-1.25394	0.396679	7.26259	0.00704057	0.0212584
	Plce1	7	1.18663	1.13833	11.3428	0.000757412	0.00227284								Gsta4	94	-1.24713	0.54783	7.16546	0.00743206	0.0222741
	Slain1	3	1.18796	0.612236	8.2318	0.00411627	0.0103329								Tmem98	38	-1.24425	0.691507	7.51485	0.00611925	0.018863
	Irak1bp1	17	1.18848	1.20096	15.1068	0.000101597	0.000364688								6330418K02Rik	388	-1.24242	3.53177	37.2834	1.02149e-09	1.38043e-08
	Gstm5	94	1.19015	3.33484	48.1501	3.94804e-12	3.65875e-11								Slc2a10	56	-1.24193	0.775782	11.0296	0.000896667	0.0036176
	Fundc2	243	1.19149	4.42004	96.1737	1.05231e-22	2.0728e-21								Cald1	247	-1.24127	1.81203	6.19616	0.0128028	0.0352083
	Gm10175	9	1.19285	0.32252	12.348	0.000441457	0.00139639								Ednrb	98	-1.2395	1.5494	10.7784	0.0010269	0.0040699
	Eno1	3921	1.19296	8.53659	156.717	5.90237e-36	2.32831e-34								Slc14a1	72	-1.23857	1.73266	10.6565	0.00109684	0.00430969
	Slc35e4	119	1.19551	3.37454	53.0346	3.27731e-13	3.36788e-12								Atp2b2	132	-1.2332	2.14225	12.9462	0.000320564	0.00147214
	Cntn2	8	1.19774	2.16698	5.5532	0.0184469	0.038878								Gm46687	77	-1.22839	1.40923	9.59797	0.00194793	0.00710159
	Cdca7l	14	1.20494	0.491238	11.2954	0.000777006	0.00232276								Ehd1	597	-1.22233	2.84557	8.77496	0.00305393	0.0104752
	Syne3	15	1.20676	0.947364	14.4201	0.000146232	0.000510766								Gm33023	52	-1.21916	0.985605	12.1839	0.000482029	0.00209274
	Rpl15-ps3	22	1.20714	1.11616	16.2144	5.65612e-05	0.000213623								LOC118567477	23	-1.21363	-0.0151576	8.58154	0.00339589	0.0114729
	Smpdl3a	397	1.21064	5.29493	98.1711	3.83748e-23	7.82773e-22								Gm40782	33	-1.21312	0.27924	8.76968	0.00306279	0.0104953
	Pcgf2	57	1.21065	2.40031	35.823	2.16083e-09	1.50914e-08								Camp	146	-1.20745	1.55466	5.69714	0.0169926	0.044532
	Gm6477	15	1.21216	0.247953	8.54654	0.00346179	0.00885399								Pik3r3	178	-1.20595	2.27754	21.18	4.18109e-06	3.04312e-05
	Gm10709	38	1.21283	2.12427	14.2679	0.000158547	0.000549406								P2ry10b	600	-1.20546	4.35305	51.2472	8.14363e-13	1.69947e-11
	Cplx2	42	1.21287	2.00672	9.58738	0.0019592	0.00532803								Vwf	974	-1.20489	3.43062	5.93968	0.0148037	0.0396701
	AI839979	20	1.21472	0.833722	13.3015	0.000265193	0.000879319								Stk39	94	-1.20391	2.22621	9.21446	0.00240112	0.00853389
	Gm41358	12	1.21517	0.0309962	9.22255	0.00239052	0.00637316								Gm14537	22	-1.20211	0.138343	5.51499	0.0188541	0.0483887
	Olfr99	9	1.21891	0.130523	10.6402	0.00110656	0.00319147								Gm16867	43	-1.20191	0.430476	8.13803	0.00433463	0.0141185
	Rab13	11	1.21985	0.356274	12.5041	0.00040607	0.00129378								Gm51961	26	-1.19973	0.13595	7.9491	0.00481112	0.0153663
	Gm11942	24	1.22258	1.29337	14.8804	0.000114549	0.00040833								Syt6	114	-1.19885	1.26848	8.80247	0.00300823	0.0103485
	Lmnb1	227	1.22371	4.5309	152.336	5.34912e-35	1.9841e-33								Vangl1	215	-1.19629	2.80893	23.4059	1.31178e-06	1.05577e-05
	Amot	4	1.22692	0.859778	10.7013	0.00107061	0.00310037								Gm38952	62	-1.19544	0.740067	9.05171	0.00262449	0.00920751
	Scimp	55	1.22894	2.35336	35.1977	2.97874e-09	2.04682e-08								A530010L16Rik	40	-1.19522	0.385289	9.28418	0.00231142	0.00826281
	Fads2	20	1.23478	2.40106	15.9085	6.64806e-05	0.000247575								Gm16118	1211	-1.19503	5.33889	52.3085	4.74321e-13	1.02304e-11
	Cenpe	55	1.23478	2.06917	28.9273	7.51465e-08	4.36846e-07								Gm3173	227	-1.19292	3.31045	19.6195	9.45005e-06	6.36103e-05
	Kndc1	9	1.23629	0.981549	6.51397	0.010703	0.0240968								Pip5k1b	32	-1.19222	0.29518	7.91659	0.00489835	0.0156131
	Eef2-ps2	87	1.23712	3.29167	50.1934	1.39314e-12	1.35772e-11								Ggnbp2os	148	-1.19122	1.96667	14.5851	0.000133971	0.000681856
	Lmna	85	1.23734	3.32789	54.8388	1.30831e-13	1.39146e-12								Zfyve28	698	-1.1904	4.46208	42.2459	8.04882e-11	1.27958e-09
	mt-Rnr2	2804	1.24165	8.16196	55.3166	1.02596e-13	1.10217e-12								Gm39859	75	-1.18926	1.53421	12.6448	0.000376619	0.00169329
	Ncan	2	1.24334	0.72128	7.01595	0.00807869	0.0187751								LOC115486538	1187	-1.18529	5.28221	24.4613	7.58186e-07	6.39307e-06
	Gapdh	249	1.24481	4.55545	13.2133	0.000277977	0.000918235								Gm32645	47	-1.18525	1.33378	9.48417	0.00207252	0.00750552
	Slc43a3	95	1.24807	2.89864	48.5202	3.26898e-12	3.06564e-11								Gm52524	38	-1.18346	0.399237	9.85888	0.00169014	0.0062692
	Atf5	156	1.24812	3.78121	28.5401	9.17762e-08	5.28981e-07								Klf2	2088	-1.18087	5.78534	7.9964	0.00468705	0.0150516
	Chchd10	60	1.24848	2.7154	39.9011	2.67151e-10	2.08669e-09								Dusp27	575	-1.18085	4.08093	39.3972	3.45789e-10	5.0543e-09
	Cyb5r3	450	1.24898	5.65589	142.226	8.67892e-33	2.9546e-31								Folr1	65	-1.17837	1.76426	7.79209	0.00524755	0.0165731
	Msmo1	391	1.25279	5.28494	147.386	6.46235e-34	2.32193e-32								Spon1	46	-1.17822	0.130176	9.70267	0.00184001	0.00674462
	LOC118568032	11	1.25329	0.595517	13.0532	0.000302764	0.000988955								Gm41610	83	-1.17723	1.31368	10.9398	0.0009412	0.00377146
	Sag	8	1.2551	0.413889	10.3392	0.00130232	0.00369673								Gm3739	1572	-1.17302	5.83575	36.7772	1.32429e-09	1.75423e-08
	Nsun7	9	1.25669	0.114602	9.1903	0.00243302	0.00647834								Gm7598	31	-1.17141	0.244391	9.72103	0.00182171	0.00668517
	Pcdh9	8	1.25684	0.908394	8.97105	0.00274291	0.00720188								Ddit4	788	-1.16978	4.10451	14.1138	0.000172075	0.000850398
	Shank3	6	1.25823	1.45914	6.6388	0.0099781	0.022643								Mex3b	1004	-1.167	4.55404	48.4863	3.32605e-12	6.35092e-11
	Zfp13	11	1.25954	0.917658	15.3532	8.91682e-05	0.000324132								Col9a3	170	-1.16315	2.95787	10.6879	0.00107837	0.0042442
	Magi2	8	1.26304	0.403738	9.65371	0.0018897	0.0051569								1700009J07Rik	78	-1.16305	1.12051	12.3508	0.000440796	0.00194169
	Mirt1	55	1.26573	1.96464	27.1467	1.88586e-07	1.04458e-06								Gm6855	42	-1.16168	0.771585	8.96074	0.00275843	0.00962254
	Ms4a4b	5	1.26907	-0.228108	5.53257	0.0186657	0.0393007								LOC100861749	2633	-1.16094	6.49453	28.1887	1.10044e-07	1.07529e-06
	Plekhh1	50	1.26935	2.42459	30.7804	2.88948e-08	1.77378e-07								Gm12258	473	-1.16051	3.90482	35.3208	2.79627e-09	3.53886e-08
	2610524H06Rik	13	1.27647	1.09757	13.4074	0.000250635	0.000835319								Mir24-2	92	-1.16046	1.27836	12.7367	0.000358554	0.00162238
	Pfkl	1767	1.27668	7.49494	155.005	1.39698e-35	5.39648e-34								Gm51987	133	-1.15885	2.127	12.2718	0.000459857	0.00200771
	Ddo	5	1.27692	0.279892	6.8819	0.00870727	0.0200733								Dmwd	89	-1.15818	1.64984	12.5663	0.000392765	0.00175528
	Mapt	33	1.27792	2.61951	9.60789	0.00193743	0.00527462								Slc23a1	63	-1.15817	0.817436	9.82844	0.00171834	0.00635776
	Ftl1	17197	1.27871	10.8144	156.983	5.16151e-36	2.05235e-34								I830077J02Rik	3237	-1.15756	6.6881	81.9111	1.42349e-19	6.21636e-18
	Gm5786	6	1.28323	-0.129131	6.66227	0.00984754	0.0223802								5830433I10Rik	36	-1.15711	0.345035	9.28891	0.00230545	0.00824866
	Haao	325	1.28329	4.50587	89.6907	2.78459e-21	4.98451e-20								Itgb7	298	-1.15349	2.3444	11.5212	0.000688075	0.00286847
	Gm12918	51	1.28365	1.99452	29.7922	4.80914e-08	2.87296e-07								Atp1b2	198	-1.15274	2.55944	9.90677	0.00164671	0.00613626
	Mfsd4b3-ps	18	1.28453	-0.227816	6.15426	0.0131096	0.0288271								Gm17025	76	-1.1523	0.992411	9.80395	0.00174137	0.00642805
	Hmmr	17	1.28523	1.18537	22.2148	2.43781e-06	1.15434e-05								9030025P20Rik	138	-1.15114	2.00478	14.9914	0.000108005	0.000564315
	Pqlc3	175	1.28613	3.96155	75.8557	3.05165e-18	4.51869e-17								Gm41361	51	-1.15093	0.422151	6.80386	0.00909611	0.0263515
	Id2	270	1.29148	4.88772	58.8895	1.66782e-14	1.93532e-13								Mical2	247	-1.14849	1.96531	9.10046	0.00255545	0.00899655
	Aldh1l1	28	1.29441	2.01277	30.7279	2.96864e-08	1.81937e-07								Nova1	877	-1.14767	4.76379	46.3446	9.91819e-12	1.79118e-10
	Glipr2	26	1.29547	1.161	16.1215	5.94067e-05	0.000223464								Dbp	389	-1.14585	4.09163	18.2304	1.95734e-05	0.000123031
	Sestd1	27	1.29654	1.99973	26.2438	3.00917e-07	1.61518e-06								Cd79b	509	-1.14534	3.73788	31.5417	1.95206e-08	2.14939e-07
	G0s2	14	1.29692	0.841223	16.8276	4.09338e-05	0.000158701								Idh2	3149	-1.14503	6.45543	93.9565	3.22535e-22	1.81815e-20
	H60b	9	1.29963	0.25334	9.10053	0.00255535	0.00676171								Ptgds	465	-1.14215	3.24618	14.2631	0.000158955	0.000794818
	Iqgap1	429	1.29966	5.64217	98.7127	2.91921e-23	5.98738e-22								Camkk1	736	-1.14061	4.39769	69.2715	8.58019e-17	2.9113e-15
	Tmem229a	18	1.30027	1.49477	10.4434	0.00123092	0.0035121								Abcc9	45	-1.14041	0.470869	8.83398	0.00295673	0.0101936
	Ptpn7	19	1.30314	1.17854	19.4234	1.04718e-05	4.50505e-05								Mfsd6	167	-1.14038	1.51599	8.04126	0.00457236	0.0147502
	Dlgap5	29	1.30316	1.14981	17.6766	2.61825e-05	0.000104751								Ntsr2	57	-1.13837	1.03251	6.6521	0.00990389	0.0284182
	Unc80	5	1.3041	-0.229541	5.70927	0.0168756	0.036004								Gm4356	82	-1.13642	1.49815	11.1541	0.000838477	0.00341006
	Gm39212	22	1.30675	0.982299	17.1717	3.4148e-05	0.00013403								4933439K11Rik	30	-1.13591	-0.194355	6.4743	0.0109446	0.0309221
	Chaf1b	11	1.30831	1.10351	16.1029	5.99929e-05	0.000225329								Emilin1	276	-1.13529	1.82691	6.55569	0.0104549	0.02974
	ND3	36	1.3099	1.89112	19.905	8.13867e-06	3.563e-05								Gm2897	30	-1.1347	0.335259	8.01393	0.00464188	0.0149442
	Rps29	1812	1.31135	7.66286	22.9481	1.66436e-06	8.06806e-06								Gm9949	146	-1.13417	2.53448	13.7954	0.000203829	0.000986651
	Bmerb1	7	1.31418	0.0592218	9.22388	0.00238879	0.00636968								Tm6sf1	3903	-1.13413	6.74103	79.3582	5.18114e-19	2.13104e-17
	Kcna2	10	1.31598	0.570746	10.7906	0.00102014	0.00297387								Rd3	28	-1.13108	0.0083911	5.99887	0.0143151	0.0385651
	N4bp3	71	1.31916	2.04728	11.2793	0.00078376	0.00234201								Mamld1	241	-1.1303	2.51396	17.5536	2.79316e-05	0.000169688
	Rps6-ps4	211	1.31983	4.46012	73.5731	9.69761e-18	1.3904e-16								Ramp2	99	-1.12987	0.787304	6.23119	0.012552	0.0346262
	Tnr	2	1.32148	-0.343051	5.19772	0.0226165	0.0464055								Gm34058	22	-1.12862	0.0557132	7.60559	0.00581878	0.018073
	Map1a	5	1.32634	1.78859	7.14466	0.00751876	0.0176388								Gm15950	16	-1.1285	-0.215017	6.4725	0.0109557	0.0309343
	Rpl34	2082	1.32738	7.75115	94.6138	2.31401e-22	4.46945e-21								Gm12708	49	-1.12815	0.696787	8.32103	0.00391888	0.012987
	Adgrb1	14	1.33174	1.39115	5.54454	0.0185384	0.0390542								Ephb3	260	-1.12691	3.04238	24.9241	5.96321e-07	5.11354e-06
	Mbp	876	1.33272	6.77778	38.0277	6.97475e-10	5.16644e-09								Slamf1	159	-1.12618	2.26033	18.0989	2.09717e-05	0.000131122
	Slc17a7	6	1.33295	0.202906	5.0881	0.0240906	0.0490932								Gm15706	78	-1.12567	1.29448	10.1982	0.00140581	0.0053441
	Fut7	15	1.33433	1.03696	24.2817	8.32237e-07	4.20661e-06								Bmp1	395	-1.12529	3.33417	33.123	8.65077e-09	1.00658e-07
	Cped1	9	1.3346	0.458846	9.43123	0.00213322	0.00576448								Cirbp	2592	-1.12527	6.43872	58.7403	1.79917e-14	4.58674e-13
	Il2rg	213	1.33584	4.12053	72.5059	1.66529e-17	2.33595e-16								Gm32133	46	-1.12022	0.489963	8.5563	0.00344329	0.0116091
	Meg3	32	1.33622	2.05999	10.4536	0.00122407	0.00349456								Gm39000	52	-1.11537	1.02838	10.3697	0.00128099	0.00492653
	Scrn1	12	1.3371	0.202105	9.51915	0.00203339	0.00551772								Plppr4	99	-1.11403	2.04426	9.8421	0.00170563	0.00631422
	Meox1	15	1.33983	-0.0708152	8.66306	0.00324726	0.00836556								Ephb6	42	-1.11305	0.491288	5.8868	0.0152548	0.0406443
	Mcf2l	2	1.33987	0.843518	7.41908	0.00645357	0.0153696								Rbfaos	35	-1.11221	0.706273	7.39056	0.0065567	0.0200196
	Bfsp1	13	1.34045	0.182618	11.9725	0.000539913	0.00167478								Gm33470	45	-1.11146	0.800626	8.87714	0.00288763	0.00999684
	Gdf11	6	1.34272	1.05466	12.0113	0.000528804	0.00164271								1700001C19Rik	66	-1.11085	1.32081	10.4599	0.00121991	0.0047134
	Adcyap1r1	6	1.34345	1.14792	8.00804	0.00465701	0.0114854								Gm32620	17	-1.10999	-0.0336655	6.76931	0.00927385	0.026792
	Gm12174	55	1.34347	2.50635	41.8385	9.91341e-11	8.09522e-10								Lrrc4	147	-1.10745	2.04968	15.0791	0.000103099	0.000543092
	LOC118568383	12	1.34571	-0.254312	8.83816	0.00294997	0.00768643								Id3	111	-1.10521	0.992862	6.06281	0.0138058	0.0374479
	B3gnt3	11	1.34789	1.02314	19.2457	1.14929e-05	4.89493e-05								Slc4a8	72	-1.10473	0.444273	6.9315	0.00846904	0.0247938
	Rilpl2	122	1.35513	3.55154	88.6171	4.79135e-21	8.40515e-20								LOC115487216	46	-1.10359	0.62444	7.95571	0.00479359	0.0153276
	Abat	33	1.3556	2.61446	16.2672	5.50087e-05	0.000208076								Rnase12	19	-1.10225	-0.142044	6.87407	0.00874553	0.0254662
	P2ry2	30	1.35562	1.29089	21.1047	4.34852e-06	1.98655e-05								Zc2hc1c	34	-1.10166	0.248473	8.98854	0.00271677	0.00950535
	Rps3a2	35	1.35591	1.71749	34.2258	4.9075e-09	3.29714e-08								Pla2g2d	91	-1.10157	1.686	9.10905	0.00254347	0.00897223
	Lpar1	4	1.35748	0.202283	9.9459	0.00161208	0.00446632								Klhdc8b	2242	-1.10064	6.11663	61.514	4.39597e-15	1.2099e-13
	Pygl	246	1.35806	4.88886	143.221	5.25852e-33	1.81925e-31								Eps8l2	106	-1.09908	0.757489	5.55332	0.0184456	0.0475646
	Plppr2	6	1.36106	0.613127	11.7196	0.000618452	0.0018967								Gm31619	246	-1.09869	3.18025	19.282	1.12766e-05	7.45227e-05
	Rhoc	331	1.36199	5.12468	93.8436	3.41462e-22	6.52762e-21								Fam228b	82	-1.09718	1.62314	12.0249	0.000524953	0.00225762
	Runx3	39	1.36318	1.86354	28.5194	9.27628e-08	5.34461e-07								Gm36109	61	-1.09494	1.37941	5.61772	0.0177797	0.0461334
	Pygo1	2	1.36719	-0.209198	9.98983	0.00157407	0.00437646								Map4k2	4323	-1.09441	6.91982	66.1258	4.23046e-16	1.30692e-14
	1110008P14Rik	37	1.37525	1.85746	31.5629	1.93084e-08	1.21378e-07								Ushbp1	67	-1.09361	0.375678	5.91535	0.0150095	0.0401303
	Rpl17-ps8	10	1.3753	0.117131	11.9864	0.000535902	0.00166268								Adam4	80	-1.09324	0.983163	8.41454	0.00372232	0.0124127
	Gm5421	15	1.37603	0.33702	15.6355	7.68006e-05	0.00028248								Vtn	223	-1.09224	2.34056	6.3097	0.0120079	0.0333989
	Hip1	161	1.3761	4.64203	84.9667	3.03433e-20	5.10665e-19								Slc16a2	145	-1.09221	2.10479	6.22494	0.0125963	0.0347092
	Septin11	310	1.37998	5.14204	198.288	4.93579e-45	2.72584e-43								LOC118568707	162	-1.09219	2.4942	15.9222	6.59995e-05	0.000363074
	A730081D07Rik	11	1.38205	0.783623	15.8891	6.71643e-05	0.000249934								Sox4	3533	-1.09192	6.57751	89.9638	2.42557e-21	1.24798e-19
	Gm10240	8	1.38259	-0.131027	11.5899	0.000663127	0.00202								Arrdc3	1880	-1.09049	5.36348	39.877	2.70476e-10	4.01149e-09
	Tmem158	18	1.38621	0.875546	17.453	2.94492e-05	0.000116818								Ccdc39	287	-1.08989	3.15881	22.4281	2.18161e-06	1.67304e-05
	Ftl1-ps1	146	1.38686	4.05511	101.766	6.24747e-24	1.3289e-22								Gm33869	491	-1.08799	4.01705	26.5445	2.57539e-07	2.35547e-06
	Aopep	260	1.38687	4.58519	118.81	1.15286e-27	3.01056e-26								Itgae	237	-1.08718	2.96018	13.2353	0.000274726	0.00128372
	Anxa4	371	1.38781	5.3464	160.757	7.73301e-37	3.13334e-35								4933417D19Rik	32	-1.08718	0.200465	7.17544	0.00739083	0.0221788
	Plxnd1	86	1.39449	4.02255	57.201	3.93461e-14	4.40458e-13								Cdkl4	74	-1.08635	1.06986	8.45296	0.0036445	0.012179
	Map2	13	1.39995	1.8823	9.58204	0.0019649	0.00534256								Ccm2l	81	-1.07987	1.32406	8.32735	0.00390525	0.0129586
	Rasal1	6	1.40114	0.515126	11.0938	0.000866152	0.00256661								Gm30908	50	-1.07844	0.73741	8.58984	0.00338044	0.0114316
	Lsamp	2	1.40966	0.580053	7.94693	0.00481691	0.0118464								Pnma2	21	-1.0743	0.332636	5.82759	0.0157767	0.0417398
	Ly6i	9	1.41272	0.188529	11.9221	0.000554729	0.00171503								Akr1c13	52	-1.07356	0.141077	7.10879	0.00767071	0.0228779
	Lrrc8b	124	1.4209	3.46022	73.1357	1.21036e-17	1.71392e-16								Plxnb1	148	-1.07324	2.32994	9.08753	0.00257358	0.00905135
	Neil2	54	1.4218	2.38359	33.679	6.49989e-09	4.31812e-08								Ahrr	97	-1.07304	1.50625	10.4942	0.00119752	0.00463957
	Efhd1	6	1.42531	0.0921219	12.0458	0.000519077	0.00161485								Gm41130	70	-1.07304	0.861857	8.34148	0.00387501	0.0128673
	Csrp1	46	1.42535	3.61112	23.9915	9.67611e-07	4.84163e-06								Sult4a1	88	-1.0723	1.44637	8.95424	0.00276827	0.00964734
	Rps15a-ps7	19	1.43458	0.893983	16.6863	4.40977e-05	0.000170303								Gm11423	94	-1.06865	1.62324	10.8502	0.000987836	0.00393383
	Cstb	370	1.43484	5.24783	157.337	4.32005e-36	1.72698e-34								Gm35658	147	-1.06691	2.59447	13.8265	0.000200491	0.000971487
	Ell2	209	1.43559	4.57995	110.394	8.03436e-26	1.88662e-24								Ly6g5b	42	-1.06483	0.733309	7.79978	0.00522526	0.0165064
	Il1b	475	1.44101	5.7371	31.3544	2.14972e-08	1.34344e-07								Scarf1	182	-1.0637	2.10398	13.1058	0.000294389	0.00136657
	Sparcl1	61	1.44744	4.93298	7.57012	0.00593437	0.0142722								Kiss1r	77	-1.06226	1.65497	9.24446	0.00236209	0.00841026
	mt-Rnr1	991	1.44767	6.91985	60.5148	7.30287e-15	8.76756e-14								Fgfr2	76	-1.05958	1.35453	7.10623	0.00768163	0.0229009
	Me1	4	1.45119	0.943927	13.1698	0.000284495	0.000938103								Gm3558	65	-1.05157	1.14986	8.25473	0.0040646	0.0134087
	Tpm4	611	1.45866	6.06179	202.285	6.62421e-46	3.78443e-44								Aoah	240	-1.05108	2.39351	11.8772	0.000568268	0.00242174
	Rcan2	15	1.46448	1.16163	13.9436	0.000188376	0.000642029								Ttll7	72	-1.05086	1.28467	6.64622	0.00993664	0.0285064
	Col16a1	2	1.46686	0.331	8.10878	0.00440515	0.0109416								Gm13421	136	-1.0503	1.36157	8.89427	0.00286067	0.0099205
	Diaph3	12	1.46836	0.673277	18.5598	1.64658e-05	6.84859e-05								Ccdc152	85	-1.05024	1.24507	8.84979	0.00293122	0.0101255
	Zfp365	6	1.47517	0.810642	11.4512	0.000714463	0.00215874								Izumo4	433	-1.04993	3.73946	34.5853	4.07971e-09	5.0064e-08
	Nrsn1	10	1.47788	0.489246	7.69632	0.00553336	0.0134137								Kcnj12	620	-1.04894	3.88798	27.3541	1.69401e-07	1.60004e-06
	Rgs20	6	1.47819	-0.351385	6.78519	0.00919172	0.0210243								Hrh2	623	-1.04842	4.41438	39.7591	2.87297e-10	4.24281e-09
	Thbs1	374	1.48869	5.19914	227.913	1.69983e-51	1.1521e-49								Nfasc	145	-1.04841	2.52185	7.03457	0.00799509	0.0236361
	Gm10819	19	1.48889	1.40542	21.643	3.28412e-06	1.52839e-05								Nrip1	6769	-1.04618	7.51363	45.8906	1.25046e-11	2.22831e-10
	Rian	9	1.49439	0.441957	6.40675	0.0113687	0.0254151								Pde4b	1070	-1.04427	4.44732	25.3278	4.8369e-07	4.21672e-06
	Gm6789	9	1.49543	0.020592	11.666	0.000636539	0.00194505								Klk8	1749	-1.04386	5.65418	45.5441	1.49241e-11	2.62965e-10
	Pcsk1n	28	1.49849	1.85971	11.6811	0.00063138	0.00193118								Gm52147	215	-1.04321	2.82384	15.7427	7.25668e-05	0.000395511
	Cyp4f18	92	1.50094	3.1492	57.9573	2.67874e-14	3.05372e-13								Ly6g6d	59	-1.04312	0.670106	7.44061	0.00637684	0.0195506
	Kcna3	68	1.50133	2.85284	44.2736	2.85539e-11	2.44975e-10								Cttn	110	-1.04272	1.00539	5.72259	0.016748	0.0439803
	Tub	4	1.50137	0.290041	7.50469	0.00615383	0.0147334								Itga2b	36	-1.04169	0.0345485	7.94837	0.00481306	0.015369
	Mobp	58	1.5147	4.04557	7.06664	0.00785323	0.0183316								Arl4d	132	-1.03982	1.93355	12.3002	0.000452911	0.00198336
	Snhg11	42	1.51563	2.03727	10.8129	0.00100797	0.00294357								Kcnab3	70	-1.03979	0.953734	8.8165	0.00298518	0.0102817
	Sqle	93	1.51672	3.45965	110.815	6.49444e-26	1.53956e-24								T2	22	-1.03838	-0.0852747	5.92875	0.0148958	0.039879
	Zap70	5	1.52602	-0.300489	9.51445	0.00203861	0.00552886								Lrrc25	2272	-1.03819	5.86603	71.6221	2.60618e-17	9.19572e-16
	Ube2c	15	1.53737	1.28555	25.8879	3.61836e-07	1.9221e-06								Palm	184	-1.03708	1.96875	11.14	0.000844879	0.00343216
	Luzp2	9	1.54153	0.725296	11.1715	0.000830629	0.00247019								Gm6277	456	-1.03535	3.87961	30.4178	3.48309e-08	3.69432e-07
	Ptprz1	9	1.54301	1.76745	11.0488	0.00088743	0.00262393								Dbn1	39	-1.0327	0.463276	5.6507	0.0174484	0.0454153
	Mdk	20	1.54416	1.79094	37.5496	8.91194e-10	6.48224e-09								Cd1d1	383	-1.03207	3.34809	24.7345	6.57955e-07	5.59796e-06
	Gria1	4	1.5477	0.579357	9.27935	0.00231752	0.00619625								Gab1	2580	-1.03107	6.13098	39.3828	3.48352e-10	5.08651e-09
	Phactr3	7	1.55288	0.213793	10.7908	0.00102007	0.00297387								Chrnb2	64	-1.03044	1.19844	8.65818	0.00325596	0.0110662
	Sdc1	5	1.55584	0.0253485	12.2563	0.0004637	0.00145962								6330409D20Rik	59	-1.02932	0.935962	7.63434	0.00572675	0.0178122
	Gm15590	22	1.5594	1.23436	29.3988	5.89128e-08	3.47579e-07								0610005C13Rik	47	-1.02911	0.485091	7.98713	0.00471111	0.0151077
	Fuom	37	1.55971	2.08947	43.5656	4.09977e-11	3.46748e-10								LOC118567870	133	-1.02772	2.42743	9.36487	0.00221183	0.007949
	Ephb1	1	1.57114	-0.280051	6.57985	0.010314	0.0233053								Nr1d1	281	-1.02615	3.51571	13.95	0.000187739	0.000918696
	Tshz2	0	1.59443	-0.386196	6.85478	0.00884044	0.0203165								4931402G19Rik	67	-1.02421	0.911267	9.54864	0.00200098	0.00726505
	Ptgs2	67	1.59614	3.27126	19.0723	1.25856e-05	5.32381e-05								Wnk3	80	-1.02356	1.23757	6.87476	0.00874216	0.0254617
	Ifitm2	99	1.61062	3.86427	122.856	1.49973e-28	4.1032e-27								Timp3	474	-1.02259	3.12478	8.06085	0.0045232	0.0146183
	Pak6	4	1.61126	-0.120679	11.5808	0.000666368	0.00202945								Celf4	156	-1.02205	2.22199	10.32	0.00131596	0.00504456
	Gpc1	18	1.61967	1.53503	37.9754	7.16416e-10	5.29098e-09								Gm46165	30	-1.01944	0.489358	6.4931	0.0108294	0.0306327
	Muc3a	10	1.62664	0.405295	15.061	0.000104094	0.000373381								Arhgef10l	1215	-1.01837	4.98134	52.6017	4.08545e-13	8.90679e-12
	Nes	208	1.65025	4.53986	56.4067	5.89305e-14	6.46587e-13								Il17ra	7517	-1.01704	7.60472	60.5729	7.0905e-15	1.8929e-13
	Il1rn	31	1.65408	1.80111	34.6097	4.02903e-09	2.73823e-08								Gm46218	71	-1.01672	1.39442	6.44507	0.0111261	0.0313405
	Ankrd33b	24	1.65536	1.67601	25.0185	5.6784e-07	2.93485e-06								Mir142b	71	-1.0167	1.24785	7.67115	0.00561106	0.0175101
	Dtna	3	1.65967	1.88959	12.0527	0.000517178	0.00160995								Gm46775	44	-1.01657	0.501474	8.03891	0.00457832	0.014766
	Trnp1	6	1.67041	-0.00394329	10.0606	0.00151475	0.00422966								Kazald1	42	-1.01649	0.210178	6.05944	0.0138322	0.0374926
	Rpl21-ps11	5	1.69472	-0.29895	15.4679	8.39192e-05	0.000306096								Znrf1	4404	-1.0161	6.85781	63.5801	1.53978e-15	4.44619e-14
	Gsn	130	1.70907	4.65905	125.914	3.21028e-29	9.20548e-28								Emp3	812	-1.01563	3.75297	15.2363	9.48617e-05	0.000503828
	Asrgl1	58	1.71479	3.11521	61.6873	4.02569e-15	4.90417e-14								Pomk	541	-1.01509	3.94417	42.8055	6.04623e-11	9.78811e-10
	Trim6	2	1.72115	0.0279997	13.0595	0.000301753	0.000986342								1500015A07Rik	70	-1.01449	1.34969	6.9186	0.00853037	0.0249527
	Arpin	6	1.73245	0.20536	21.7225	3.15078e-06	1.47139e-05								Lefty1	305	-1.01205	3.19045	21.8034	3.02067e-06	2.253e-05
	C920009B18Rik	33	1.73248	1.79289	49.0032	2.55548e-12	2.42215e-11								Pdss1	260	-1.01141	3.00892	21.7184	3.15751e-06	2.34149e-05
	Gm28913	12	1.74169	0.547133	19.3926	1.06419e-05	4.57428e-05								Gm33747	73	-1.01126	1.22921	9.86136	0.00168787	0.00626814
	Gm6311	9	1.74915	0.105515	22.7679	1.82797e-06	8.79821e-06								Fcrlb	177	-1.00802	1.44924	6.1811	0.0129122	0.0354609
	Plin2	391	1.75643	5.7824	302.048	1.17923e-67	1.22961e-65								Chsy1	3795	-1.0079	6.75348	83.4648	6.4861e-20	2.9414e-18
	Rimklb	0	1.76156	0.54423	10.1295	0.00145917	0.00409056								Per3	774	-1.00389	5.32745	10.4359	0.0012359	0.00476998
	Drp2	5	1.79793	0.278963	15.1246	0.000100642	0.000361609								Foxp3	39	-1.00095	0.197188	6.38845	0.0114865	0.0322275
	Fbxo2	6	1.80176	0.256739	15.3955	8.71942e-05	0.000317497								Apod	141	-1.0004	1.75404	5.85478	0.0155348	0.0412231
	Mlc1	2	1.80547	1.4601	10.8464	0.000989867	0.00289353							105	Lipa	4339	1.00069	7.60695	59.4246	1.27069e-14	3.30495e-13
	Insyn1	4	1.80599	-0.145582	13.8524	0.000197741	0.000671338								Ergic3	3973	1.00622	7.67755	58.706	1.83081e-14	4.64232e-13
	Gcm2	3	1.80759	-0.344996	12.9103	0.00032677	0.00106039								Raver2	26	1.00664	0.505814	5.65226	0.0174329	0.0453833
	Rgs6	2	1.8157	-0.201417	13.9383	0.000188913	0.000643563								Man2b2	7346	1.0071	8.72998	48.6364	3.08094e-12	5.93092e-11
	Rem1	2	1.83168	-0.289895	10.776	0.00102823	0.00299509								Gm27042	34	1.00918	0.917518	8.48994	0.00357115	0.0119764
	Aldoc	36	1.83939	3.3287	17.1867	3.38809e-05	0.000133087								Gga2	760	1.00996	5.35028	67.4868	2.121e-16	6.836e-15
	Scn3b	3	1.84027	-0.318967	18.0351	2.16868e-05	8.82804e-05								Rps19-ps6	67	1.01302	2.44324	10.8021	0.00101382	0.00402373
	Gm10076	142	1.84974	4.45544	21.8593	2.93387e-06	1.37786e-05								Nucb1	7419	1.02334	8.50363	58.8519	1.69994e-14	4.34944e-13
	Rab11fip1	29	1.85131	2.08513	59.0296	1.55315e-14	1.81071e-13								Clybl	68	1.02746	1.8948	13.0978	0.000295638	0.00137147
	Rab15	4	1.85418	0.211327	10.0335	0.00153718	0.00428509								Gm46060	30	1.03149	1.19609	7.45948	0.00631032	0.0193718
	Cd44	128	1.8566	3.87847	175.619	4.38554e-40	1.99978e-38								Ccl5	154	1.03262	2.56583	6.84731	0.00887747	0.0257864
	Tmod2	29	1.85723	2.28532	23.8453	1.04397e-06	5.20973e-06								Iqgap3	676	1.03738	5.15668	74.2627	6.83838e-18	2.55969e-16
	Rph3a	13	1.86773	0.886251	13.671	0.000217791	0.000734061								Gm4705	18	1.04757	-0.107991	5.52332	0.0187646	0.0482203
	Ikbke	46	1.87706	2.7361	31.4347	2.0626e-08	1.29225e-07								H2-T22	1077	1.05782	5.87577	53.8041	2.21513e-13	4.95916e-12
	Gadd45a	22	1.8838	1.69697	48.729	2.93885e-12	2.76649e-11								Rpl36-ps12	50	1.05848	1.19968	8.80601	0.00300241	0.0103335
	Rasl10b	5	1.89023	1.28877	14.6394	0.000130162	0.000459808								Ifih1	871	1.062	5.59016	55.6061	8.85472e-14	2.06401e-12
	Gadd45b	75	1.89086	3.6963	25.9976	3.41839e-07	1.82237e-06								Phf11d	492	1.06367	4.95433	64.9427	7.7109e-16	2.33123e-14
	B4galnt4	5	1.93298	-0.301204	13.5389	0.000233663	0.00078278								Cxcl10	398	1.06626	3.98052	6.05675	0.0138533	0.0375327
	Dlgap3	10	1.96024	1.10226	12.7681	0.000352577	0.0011372								Dnaaf4	14	1.06704	-0.00772176	7.77029	0.00531124	0.0167444
	Igfbp6	5	1.97652	0.188955	22.624	1.97009e-06	9.44264e-06								Dhx58	588	1.07037	5.16086	54.4707	1.57784e-13	3.59498e-12
	Sec14l5	2	1.97776	0.663965	7.0024	0.00814004	0.0189118								Gm15459	379	1.07225	4.09526	26.8154	2.23849e-07	2.07144e-06
	Sdr39u1	7	1.98581	0.0952425	20.6412	5.53911e-06	2.49377e-05								Rpl9-ps7	85	1.07633	1.93318	12.1353	0.000494759	0.00214405
	Gm42323	5	1.99808	-0.0425261	18.2555	1.93167e-05	7.91948e-05								Epb41l5	85	1.07718	2.35528	17.7351	2.53901e-05	0.000155249
	Gm32673	4	2.0369	-0.00490422	20.3367	6.49419e-06	2.88113e-05								Maged1	2413	1.07782	7.10895	93.3388	4.40668e-22	2.42607e-20
	Ankrd55	2	2.09959	-0.152228	21.6763	3.22746e-06	1.50436e-05								Gm31292	22	1.08384	0.97338	10.0953	0.0014865	0.00560419
	H19	0	2.10184	1.55582	5.64056	0.0175496	0.0372024								Hspa1b	2618	1.08433	7.14787	19.3498	1.08831e-05	7.22594e-05
	Plp2	26	2.1099	2.27346	62.3193	2.92047e-15	3.59004e-14								Lyst	2551	1.08755	7.07068	99.5409	1.9215e-23	1.21916e-21
	Arhgef26	1	2.14804	0.0177712	17.7636	2.50117e-05	0.000100417								Gm34432	78	1.0933	2.26227	14.4583	0.0001433	0.000724124
	Il4i1	3	2.16015	-0.197208	23.2699	1.40789e-06	6.90336e-06								Mb21d2	156	1.09367	3.0363	20.9013	4.83568e-06	3.47486e-05
	Tst	8	2.18459	0.991344	46.9654	7.22522e-12	6.54527e-11								Tgoln1	6059	1.0954	8.32095	66.1992	4.07585e-16	1.26745e-14
	Pla2r1	0	2.19785	-0.754452	9.35034	0.00222945	0.00598978								Fnip2	3458	1.09556	7.33568	82.5682	1.02084e-19	4.51373e-18
	Cacna1e	43	2.21896	2.16667	56.6806	5.12673e-14	5.65838e-13								Gm51770	27	1.09733	0.361617	8.15215	0.00430102	0.0140316
	Adcy1	2	2.25619	0.567287	10.8943	0.000964621	0.00282972								Ly6e	20603	1.09858	10.1077	29.7225	4.98529e-08	5.14492e-07
	F2rl1	0	2.26123	-0.185386	12.6171	0.000382245	0.00122231								H2bc8	140	1.10073	3.04865	9.57785	0.00196939	0.00717059
	Scg3	7	2.28999	1.61495	22.7363	1.85825e-06	8.93532e-06								Mpst	361	1.10115	4.21507	38.5257	5.40367e-10	7.66866e-09
	Rapgef4	22	2.38507	3.32861	24.1459	8.93044e-07	4.48658e-06								Gm41107	52	1.10418	1.69894	9.74974	0.00179348	0.00660119
	Mak	1	2.41654	-0.0553783	24.9736	5.81197e-07	2.99766e-06								Rora	356	1.1079	4.18323	36.967	1.20145e-09	1.60523e-08
	Kif5c	39	2.43213	2.98594	50.4434	1.2265e-12	1.20239e-11								Npr1	92	1.10905	2.30879	13.9301	0.000189737	0.000927318
	Gfra1	3	2.44997	0.205823	26.5459	2.57344e-07	1.39132e-06								Cfb	87	1.12744	1.53819	7.88539	0.00498359	0.0158527
	Wasf3	7	2.48467	2.12129	36.0179	1.95508e-09	1.3764e-08								Xaf1	685	1.12838	5.42935	67.5154	2.09051e-16	6.75377e-15
	Shc3	4	2.49391	0.983295	23.5553	1.21375e-06	5.99873e-06								2210418O10Rik	12	1.13013	-0.0153342	8.52208	0.00350864	0.0118048
	Vegfa	87	2.53984	4.26215	179.857	5.2066e-41	2.45682e-39								H2-T23	6560	1.13705	8.48052	58.3247	2.2224e-14	5.58522e-13
	Acpp	0	2.56251	-0.385558	20.7853	5.13764e-06	2.32355e-05								Gm14648	20	1.1422	0.862627	9.85917	0.00168987	0.0062692
	Slc1a2	34	2.56874	5.05831	25.9218	3.55524e-07	1.89059e-06								Chic1	131	1.14693	3.30889	25.7726	3.84099e-07	3.40302e-06
	Slc7a2	2	2.57688	1.84328	46.4463	9.41648e-12	8.44312e-11								Lrrc9	70	1.14738	2.09725	14.6469	0.00012965	0.000664402
	Ass1	11	2.59237	1.72841	94.7306	2.18141e-22	4.24081e-21								Gm21399	31	1.16435	0.127461	8.00219	0.00467208	0.0150171
	Ntm	5	2.6098	1.30004	47.4082	5.76406e-12	5.25354e-11								Shroom4	41	1.17517	0.754825	7.74017	0.00540058	0.0169655
	Stra6l	6	2.66098	1.50792	38.367	5.86141e-10	4.38752e-09								Gm30189	26	1.18554	1.0937	10.1217	0.00146534	0.00553915
	Col2a1	2	2.68587	-0.0303568	16.2262	5.62103e-05	0.000212351								LOC118567384	71	1.1947	1.00533	6.34041	0.0118017	0.0329225
	Ddn	20	2.71538	2.31142	22.5866	2.00876e-06	9.61562e-06								Socs6	1947	1.19568	6.8306	115.333	6.65192e-27	5.70412e-25
	Pgk1-rs7	4	2.75411	-0.391531	31.1394	2.40153e-08	1.49143e-07				530				Amotl2	88	1.20527	1.95581	12.3156	0.000449198	0.00197137
	Rims1	2	2.86021	1.71863	25.6179	4.16163e-07	2.19195e-06								Stat2	1648	1.21686	6.62447	53.971	2.03473e-13	4.56249e-12
	Ptprt	4	2.96281	1.09402	46.2509	1.04039e-11	9.28383e-11								Clec1b	24	1.21741	0.39649	7.50125	0.00616562	0.0189853
	Lgals3	133	3.03009	5.06273	321.051	8.5514e-72	1.02831e-69								Pcdhga7	35	1.23224	1.08336	15.1801	9.77254e-05	0.000517678
	Slc41a2	3	3.17025	1.52287	71.136	3.33434e-17	4.62927e-16								Atp6v0c-ps2	40	1.2584	0.975477	13.1966	0.000280452	0.00130745
	Gm30474	3	3.17604	-0.023443	28.3727	1.00069e-07	5.74338e-07								Adcy4	116	1.26106	1.99716	8.47063	0.00360926	0.0120755
	Mir155hg	0	3.4058	-0.499645	33.5821	6.83168e-09	4.52542e-08								Zfp541	24	1.2791	0.883463	12.6742	0.000370733	0.00167001
	Stac2	6	3.48042	1.39541	90.1423	2.21637e-21	4.01559e-20								Rps13-ps1	36	1.2862	1.02122	13.7734	0.000206235	0.000996157
	Selenbp2	1	3.96282	-0.0488543	41.5641	1.1407e-10	9.24905e-10								Lrfn3	69	1.28637	2.90803	18.9998	1.30735e-05	8.57169e-05
	LOC118568382	1	4.06276	-0.656579	36.0695	1.90406e-09	1.34175e-08								Gdap10	107	1.28929	2.77117	28.9074	7.59241e-08	7.608e-07
	Scrg1	2	4.10142	-0.368189	38.4608	5.58635e-10	4.19005e-09								F830016B08Rik	149	1.30063	3.90637	20.1545	7.14337e-06	4.93032e-05
	Spp1	162	6.90458	9.35979	357.681	9.00628e-80	1.29128e-77								Ifi208	34	1.32259	1.22339	12.309	0.000450775	0.00197584
	Atp6v0d2	1	8.20447	4.48754	736.084	4.25835e-162	1.54869e-159								LOC115487221	18	1.33856	0.567679	12.2384	0.000468159	0.00203752
	Gpnmb	16	9.47735	8.81468	917.417	1.60568e-201	8.25594e-199								H3c15	21	1.34215	-0.0529139	8.22866	0.0041234	0.0135679
															H2bc6	92	1.34733	2.17711	15.6292	7.70537e-05	0.000416671
															AY512915	4	1.35593	-0.332717	6.92004	0.00852349	0.0249377
															Rps18-ps4	14	1.37215	0.24895	12.9984	0.000311761	0.0014359
															Itgad	17	1.3756	-0.0471698	9.29156	0.00230212	0.00824416
															Gpc4	32	1.37935	0.75322	5.50984	0.0189097	0.0485051
															Gbp2	327	1.41377	4.3165	17.8344	2.40991e-05	0.00014793
															Rpl17-ps9	18	1.41799	0.0903827	11.2215	0.000808544	0.00330543
															Cxcr6	17	1.42394	0.650737	13.5305	0.000234713	0.00111854
															H3c14	21	1.44515	0.508242	16.8599	4.02418e-05	0.000236356
															Nek5	35	1.45143	1.40231	21.319	3.88858e-06	2.84632e-05
															Cxcl9	115	1.45755	2.24447	14.1183	0.000171663	0.000848955
															Gm13680	143	1.46216	3.15134	35.2433	2.90978e-09	3.6631e-08
															Atf3	2879	1.46775	7.4355	53.3495	2.79177e-13	6.16237e-12
															Pdyn	43	1.47091	0.890672	9.06589	0.00260422	0.0091432
															Gm52775	20	1.48458	1.09255	17.279	3.2273e-05	0.000193405
															TrnN	30	1.50426	0.956747	15.8563	6.83373e-05	0.000374914
															Gm36897	47	1.5222	1.44172	20.202	6.96812e-06	4.82584e-05
															Rtp4	430	1.56646	5.05615	67.725	1.87962e-16	6.11374e-15
															H3c4	16	1.59583	0.0703778	17.4961	2.87897e-05	0.000174602
															H2ac7	16	1.60091	0.0178873	13.1136	0.000293167	0.00136135
															Rpl34-ps1	564	1.72079	5.54365	28.4625	9.55287e-08	9.4125e-07
															Gbp4	125	1.74339	2.8974	21.999	2.72795e-06	2.05635e-05
															H1f4	31	1.75087	1.05169	13.0037	0.000310872	0.00143231
															Col3a1	11	1.76364	-0.0918804	13.0758	0.000299143	0.001385
															Zfp9	11	1.8012	0.132388	22.4763	2.12758e-06	1.63515e-05
															TrnW	11	1.9128	-0.165935	11.6219	0.00065181	0.0027315
															Nptxr	38	1.93034	1.38073	26.4295	2.73328e-07	2.49504e-06
															LOC118568312	21172	1.97368	11.1534	8.71085	0.00316322	0.0108081
															H2bc3	10	1.98348	-0.590508	11.8961	0.000562503	0.00240014
															Hbb-y	30	2.04112	2.35646	5.86682	0.0154289	0.0409883
															H4c12	13	2.28833	-0.000478772	30.1259	4.0488e-08	4.24974e-07
															Iigp1	94	2.29155	3.65651	29.7626	4.88322e-08	5.05064e-07
															Lars2	1420	2.34946	7.52884	12.6004	0.000385672	0.0017285
															Igf1os	8	3.2928	-0.385073	31.6936	1.80514e-08	1.99695e-07
															LOC118568405	6	3.39676	-0.0368122	46.0298	1.16466e-11	2.08592e-10
															Olfr98	3	3.64564	-0.584584	37.5407	8.95245e-10	1.22267e-08
															Gpr31c	1	4.19519	-0.756319	39.8777	2.70374e-10	4.01149e-09
															Dpys	4	4.78581	-0.310441	65.5894	5.55373e-16	1.70086e-14
															Rn7sk	67	5.2132	5.77636	27.7093	1.40981e-07	1.35328e-06
															Rpph1	14	5.78564	4.18433	28.3363	1.01964e-07	1.00048e-06
															Rmrp	10	6.64461	3.68173	20.8248	5.0326e-06	3.60538e-05

## Sheet: Female 5X compare (2)
	Gene name	logFC	logCPM	LR	PValue	FDR							NX 5X vs NX WT	Gene name	logFC	logCPM	LR	PValue	FDR
IH 5X v IH WT	1500009C09Rik	3.47569	1.25273	70.9518	3.66065e-17	5.07285e-16	1500009C09Rik							1500009C09Rik	2.66949	0.485352	36.3143	1.67928e-09	2.19595e-08	1500009C09Rik
	1600010M07Rik	-1.12064	1.29641	17.7321	2.54293e-05	0.000102012	1600010M07Rik							1600010M07Rik	-1.46726	1.30208	15.6289	7.70675e-05	0.000416671	1600010M07Rik
	1700003F12Rik	1.83468	3.16039	65.2242	6.68435e-16	8.48981e-15	1700003F12Rik							1700003F12Rik	1.26622	2.85748	21.331	3.86434e-06	2.83151e-05	1700003F12Rik
	1700011L22Rik	-1.77157	0.03403	14.9464	0.000110609	0.000395704	1700011L22Rik							1700011L22Rik	-1.6111	-0.176366	10.3013	0.0013294	0.00508506	1700011L22Rik
	1700020L24Rik	-2.16274	1.10985	44.0555	3.19201e-11	2.7307e-10	1700020L24Rik							1700020L24Rik	-2.13051	0.998567	31.2934	2.2183e-08	2.41437e-07	1700020L24Rik
	2310022B05Rik	1.27987	4.98519	149.627	2.09144e-34	7.64351e-33	2310022B05Rik							2310022B05Rik	1.158	4.95422	57.7935	2.91136e-14	7.20154e-13	2310022B05Rik
	2310034O05Rik	2.58118	0.908064	43.7288	3.77189e-11	3.20106e-10	2310034O05Rik							2310034O05Rik	4.0473	0.438177	81.5028	1.75011e-19	7.57259e-18	2310034O05Rik
	2310047D07Rik	-1.53695	3.2555	63.852	1.34128e-15	1.67925e-14	2310047D07Rik							2310047D07Rik	-1.47003	2.92769	32.0943	1.46866e-08	1.64529e-07	2310047D07Rik
	2900052N01Rik	5.63672	2.27325	124.106	7.98413e-29	2.22526e-27	2900052N01Rik							2900052N01Rik	3.55337	1.59023	66.7353	3.10521e-16	9.80707e-15	2900052N01Rik
	4833418N02Rik	-1.05775	2.1039	23.7543	1.09452e-06	5.44737e-06	4833418N02Rik							4833418N02Rik	-1.07004	1.89099	12.6635	0.000372855	0.00167797	4833418N02Rik
	4930486L24Rik	1.82236	1.99536	46.3863	9.70909e-12	8.68981e-11	4930486L24Rik							4930486L24Rik	1.78326	1.90129	35.7401	2.25478e-09	2.88976e-08	4930486L24Rik
	4930512H18Rik	1.0235	0.394748	5.39927	0.0201451	0.0419223	4930512H18Rik							4930512H18Rik	1.40267	0.209859	10.0478	0.00152532	0.00573679	4930512H18Rik
	4930556M19Rik	3.79976	1.70346	163.963	1.54148e-37	6.38472e-36	4930556M19Rik							4930556M19Rik	3.30845	1.48457	61.3912	4.67888e-15	1.274e-13	4930556M19Rik
	4930581F22Rik	-1.02089	2.9748	32.9831	9.29631e-09	6.07438e-08	4930581F22Rik							4930581F22Rik	-1.12761	2.75462	20.6751	5.44189e-06	3.8731e-05	4930581F22Rik
	4930597O21Rik	2.01042	0.119716	23.291	1.39253e-06	6.83251e-06	4930597O21Rik							4930597O21Rik	3.26868	0.0290885	36.9877	1.18877e-09	1.59129e-08	4930597O21Rik
	4933432I03Rik	1.05632	0.711722	9.87749	0.00167313	0.00461771	4933432I03Rik							4933432I03Rik	1.0312	0.712447	8.48415	0.00358255	0.0120089	4933432I03Rik
	5330438D12Rik	-1.05602	2.11225	15.4937	8.2783e-05	0.000302692	5330438D12Rik							5330438D12Rik	-1.20406	1.84877	12.0867	0.000507831	0.00219238	5330438D12Rik
	5730435O14Rik	-2.48017	0.852882	54.1734	1.83558e-13	1.92749e-12	5730435O14Rik							5730435O14Rik	-2.59332	0.141885	27.8474	1.31271e-07	1.26609e-06	5730435O14Rik
	5730552O08Rik	2.0737	0.693148	31.0449	2.52133e-08	1.56063e-07	5730552O08Rik							5730552O08Rik	1.80282	0.383581	22.8597	1.74263e-06	1.36299e-05	5730552O08Rik
	5830444B04Rik	-1.01266	3.53775	13.841	0.000198942	0.000675263	5830444B04Rik							5830444B04Rik	-1.21092	3.74137	20.4526	6.11253e-06	4.28999e-05	5830444B04Rik
	5930430L01Rik	1.96383	1.44608	39.6347	3.06187e-10	2.37049e-09	5930430L01Rik							5930430L01Rik	2.07811	1.22693	28.1847	1.10272e-07	1.07677e-06	5930430L01Rik
	8030442B05Rik	-1.94217	2.82196	98.8059	2.78506e-23	5.74386e-22	8030442B05Rik							8030442B05Rik	-1.84713	2.51826	36.4441	1.57109e-09	2.06209e-08	8030442B05Rik
	9130214F15Rik	2.3591	1.05663	40.2838	2.19628e-10	1.73091e-09	9130214F15Rik							9130214F15Rik	2.61539	0.761452	31.153	2.38475e-08	2.58955e-07	9130214F15Rik
	9330175E14Rik	1.4496	0.363084	10.2845	0.00134153	0.00379501	9330175E14Rik							9330175E14Rik	1.48412	0.28684	8.70929	0.00316593	0.0108147	9330175E14Rik
	A2m	-1.19092	1.61498	5.42968	0.0197973	0.0413095	A2m							A2m	-1.59189	1.60334	6.09841	0.0135303	0.0368411	A2m
	A430093F15Rik	3.79954	2.25042	180.304	4.16037e-41	1.98196e-39	A430093F15Rik							A430093F15Rik	3.75473	2.01952	113.752	1.4767e-26	1.24368e-24	A430093F15Rik
	A930002C04Rik	3.84859	0.312043	73.4546	1.02978e-17	1.47361e-16	A930002C04Rik							A930002C04Rik	4.01853	0.189669	70.0296	5.84204e-17	2.01117e-15	A930002C04Rik
	AA414768	1.58089	1.86033	45.6397	1.42128e-11	1.25401e-10	AA414768							AA414768	1.46403	1.74892	18.9702	1.32775e-05	8.69336e-05	AA414768
	Abca5	1.97922	2.61718	89.5129	3.04639e-21	5.42709e-20	Abca5							Abca5	1.53188	2.68061	29.7748	4.85249e-08	5.02462e-07	Abca5
	Abca8b	2.35766	0.0122287	22.1812	2.48096e-06	1.17366e-05	Abca8b							Abca8b	2.28727	-0.0337363	29.6414	5.1984e-08	5.3376e-07	Abca8b
	Abcb1b	1.13341	6.04802	197.443	7.54868e-45	4.10797e-43	Abcb1b							Abcb1b	1.25337	6.04881	77.6701	1.21771e-18	4.86704e-17	Abcb1b
	Abcg3	-1.53806	3.82219	95.6929	1.34158e-22	2.62869e-21	Abcg3							Abcg3	-1.67677	3.58211	61.3674	4.73596e-15	1.28616e-13	Abcg3
	Abhd15	-1.18564	6.19792	108.128	2.51967e-25	5.79797e-24	Abhd15							Abhd15	-1.09951	6.22176	35.2924	2.83735e-09	3.58443e-08	Abhd15
	Abi3bp	5.14939	2.43916	294.248	5.90184e-66	5.98655e-64	Abi3bp							Abi3bp	5.09618	2.39682	135.858	2.14306e-31	2.44533e-29	Abi3bp
	Acaca	3.98477	6.55596	587.999	6.82648e-130	1.92056e-127	Acaca							Acaca	4.07302	6.77767	895.368	9.9712e-197	1.41082e-192	Acaca
	Acod1	1.41413	0.712331	11.4426	0.000717807	0.00216752	Acod1							Acod1	-2.6362	2.29154	6.47426	0.0109448	0.0309221	Acod1
	Acot1	1.42962	0.983081	25.1685	5.25331e-07	2.72555e-06	Acot1							Acot1	1.01876	1.15503	8.00848	0.00465588	0.0149753	Acot1
	Actn1	-1.33776	5.00599	215.485	8.73697e-49	5.42821e-47	Actn1							Actn1	-1.61357	5.00712	59.9325	9.81691e-15	2.59141e-13	Actn1
	Actr3b	6.0282	4.5322	708.033	5.35792e-156	1.81573e-153	Actr3b							Actr3b	5.07998	4.39084	244.334	4.46301e-55	1.66177e-52	Actr3b
	Acvr2b	-1.20934	6.11185	108.516	2.07144e-25	4.79616e-24	Acvr2b							Acvr2b	-1.13844	6.02674	36.5507	1.48744e-09	1.95593e-08	Acvr2b
	Acy1	-1.37067	4.24985	135.471	2.60441e-31	8.17566e-30	Acy1							Acy1	-1.35409	4.06701	77.5158	1.31662e-18	5.2036e-17	Acy1
	Ada	-1.55144	1.29967	25.4058	4.64512e-07	2.42519e-06	Ada							Ada	-1.44442	0.940723	15.6664	7.55546e-05	0.000409587	Ada
	Adamts1	2.39065	6.06312	59.0303	1.55266e-14	1.81071e-13	Adamts1							Adamts1	2.40864	6.20306	79.5206	4.77228e-19	1.9686e-17	Adamts1
	Adamtsl2	-2.21029	3.16719	97.4481	5.52874e-23	1.11858e-21	Adamtsl2							Adamtsl2	-2.32895	3.17014	66.2463	3.97952e-16	1.24296e-14	Adamtsl2
	Adap1	1.32007	6.07447	218.856	1.60702e-49	1.01967e-47	Adap1							Adap1	1.24753	6.00604	89.4477	3.14847e-21	1.58533e-19	Adap1
	Adarb1	1.74498	5.95996	327.321	3.68308e-73	4.61499e-71	Adarb1							Adarb1	1.92196	5.9556	173.464	1.2964e-39	2.41352e-37	Adarb1
	Adcy3	1.5598	4.61985	202.953	4.73612e-46	2.72665e-44	Adcy3							Adcy3	1.76345	4.7739	157.327	4.3419e-36	6.75094e-34	Adcy3
	Adcy8	-1.94509	3.73905	216.848	4.40586e-49	2.77197e-47	Adcy8							Adcy8	-2.36531	3.63341	54.3206	1.70305e-13	3.86162e-12	Adcy8
	Adgre4	-1.29826	1.63691	15.3017	9.16332e-05	0.000331935	Adgre4							Adgre4	-1.47128	1.73535	15.9705	6.43359e-05	0.000355166	Adgre4
	Adgrg3	2.28491	1.09032	34.5087	4.24345e-09	2.87218e-08	Adgrg3							Adgrg3	1.42567	1.04321	8.93828	0.00279255	0.00972718	Adgrg3
	Adora1	3.39246	3.41681	283.594	1.23708e-63	1.1978e-61	Adora1							Adora1	3.29927	3.64196	183.587	7.98654e-42	1.73849e-39	Adora1
	Adra2a	-1.56058	1.4282	16.4321	5.04232e-05	0.000192538	Adra2a							Adra2a	-1.35389	1.46396	13.5068	0.000237696	0.00113162	Adra2a
	Adrb2	-1.37629	6.9386	174.264	8.66661e-40	3.88071e-38	Adrb2							Adrb2	-1.53957	6.91178	89.5433	3e-21	1.52687e-19	Adrb2
	Adssl1	2.61955	6.27758	594.827	2.23357e-131	6.40475e-129	Adssl1							Adssl1	2.297	6.2404	127.356	1.55265e-29	1.60353e-27	Adssl1
	Adtrp	-1.94016	1.35839	46.7777	7.95144e-12	7.16398e-11	Adtrp							Adtrp	-2.19994	1.24234	29.7162	5.00161e-08	5.158e-07	Adtrp
	Afm	-1.65246	1.88447	34.539	4.17798e-09	2.83172e-08	Afm							Afm	-1.9726	1.53158	18.8243	1.43329e-05	9.33252e-05	Afm
	Agap1	1.68192	4.86429	247.61	8.6189e-56	6.90948e-54	Agap1							Agap1	1.43562	4.80076	38.0953	6.73734e-10	9.37332e-09	Agap1
	Ager	-1.40631	1.56926	30.924	2.68333e-08	1.65335e-07	Ager							Ager	-1.52809	1.23026	16.0286	6.23928e-05	0.000346195	Ager
	Ahnak2	5.48291	3.36388	472.89	7.53302e-105	1.58204e-102	Ahnak2							Ahnak2	3.37196	3.3586	23.899	1.01526e-06	8.35654e-06	Ahnak2
	Aifm2	2.01772	1.88181	57.1111	4.11878e-14	4.59694e-13	Aifm2							Aifm2	1.25218	2.10446	14.5663	0.000135316	0.000687957	Aifm2
	Ak4	3.7944	2.52499	135.183	3.01149e-31	9.43368e-30	Ak4							Ak4	2.96176	2.6198	30.3424	3.62132e-08	3.83232e-07	Ak4
	Akap1	1.27607	5.48283	114.636	9.4541e-27	2.3417e-25	Akap1							Akap1	1.32466	5.38255	64.7045	8.70137e-16	2.60838e-14	Akap1
	Akap3	-1.86616	1.35888	30.9403	2.66087e-08	1.64155e-07	Akap3							Akap3	-1.72583	0.833979	20.9872	4.62366e-06	3.33947e-05	Akap3
	Akap5	1.79723	4.46686	234.516	6.173e-53	4.38312e-51	Akap5							Akap5	1.6769	4.41403	84.0956	4.71425e-20	2.15167e-18	Akap5
	Akt3	1.30105	6.18923	175.775	4.05445e-40	1.86592e-38	Akt3							Akt3	1.36601	6.2006	98.3452	3.51452e-23	2.14341e-21	Akt3
	Alb	-1.32768	0.144496	6.71233	0.00957483	0.021817	Alb							Alb	-1.4423	0.0535938	7.82115	0.00516383	0.0163379	Alb
	Alcam	2.89405	3.7025	207.976	3.79689e-47	2.24665e-45	Alcam							Alcam	1.82719	3.92019	16.0932	6.0299e-05	0.000336026	Alcam
	Aldh1a1	4.78062	2.38157	124.288	7.28475e-29	2.03414e-27	Aldh1a1							Aldh1a1	3.51629	1.83488	74.102	7.41826e-18	2.76942e-16	Aldh1a1
	Aldh1b1	1.38085	1.76928	32.7613	1.04198e-08	6.7552e-08	Aldh1b1							Aldh1b1	1.04871	1.61146	10.1828	0.00141755	0.00538297	Aldh1b1
	Aldh1l2	1.05651	3.62698	29.3737	5.96827e-08	3.51751e-07	Aldh1l2							Aldh1l2	1.09075	3.60631	23.5655	1.20731e-06	9.78366e-06	Aldh1l2
	Aldh2	1.54589	7.0728	197.027	9.30124e-45	4.98888e-43	Aldh2							Aldh2	1.44888	7.15424	83.3973	6.71149e-20	3.03389e-18	Aldh2
	Aldoa	1.61595	9.15374	260.791	1.15396e-58	9.83241e-57	Aldoa							Aldoa	1.39889	9.32949	42.9762	5.54102e-11	9.0531e-10	Aldoa
	Alkbh2	1.50653	3.71172	96.5317	8.78277e-23	1.74149e-21	Alkbh2							Alkbh2	1.30604	3.75124	50.5742	1.14741e-12	2.34946e-11	Alkbh2
	Angptl2	-1.24309	0.539105	8.01731	0.00463323	0.0114343	Angptl2							Angptl2	-1.42553	0.639769	10.9034	0.000959902	0.00383745	Angptl2
	Angptl7	-1.59247	3.73378	115.804	5.24674e-27	1.31707e-25	Angptl7							Angptl7	-1.71363	3.54696	51.0538	8.98671e-13	1.86441e-11	Angptl7
	Ank	4.19692	9.21743	1199.62	7.36302e-263	9.9809e-260	Ank							Ank	4.15008	9.22912	452.346	2.2262e-100	3.14986e-97	Ank
	Ano7	-1.10516	4.2566	49.6882	1.8023e-12	1.74055e-11	Ano7							Ano7	-1.12739	3.81541	38.6876	4.97371e-10	7.10121e-09	Ano7
	Antxr2	2.51634	3.50717	184.399	5.30803e-42	2.60356e-40	Antxr2							Antxr2	1.92643	3.83737	25.4838	4.46103e-07	3.91801e-06	Antxr2
	Anxa2	3.03235	5.02014	348.402	9.44559e-78	1.29214e-75	Anxa2							Anxa2	1.53953	5.22478	8.20081	0.00418717	0.013733	Anxa2
	Anxa5	2.4122	6.93938	346.481	2.47375e-77	3.32307e-75	Anxa5							Anxa5	2.013	7.04281	59.9218	9.87012e-15	2.6006e-13	Anxa5
	Apbb2	2.16132	6.12017	679.43	8.89124e-150	2.82079e-147	Apbb2							Apbb2	1.96047	6.14539	141.065	1.55716e-32	1.89934e-30	Apbb2
	Aplp2	2.66722	8.73717	526.174	1.92043e-116	4.69434e-114	Aplp2							Aplp2	2.63279	8.77376	183.127	1.00606e-41	2.12458e-39	Aplp2
	Apobec2	-2.51395	1.1296	63.1221	1.94281e-15	2.41612e-14	Apobec2							Apobec2	-2.70445	0.85363	35.7434	2.25094e-09	2.88744e-08	Apobec2
	Apoc1	2.67343	0.208511	29.2914	6.22705e-08	3.66278e-07	Apoc1							Apoc1	1.91231	0.25726	15.3686	8.8446e-05	0.000472742	Apoc1
	Apoc4	6.40071	1.8881	97.1072	6.56739e-23	1.31799e-21	Apoc4							Apoc4	7.15151	2.00672	70.9042	3.75003e-17	1.31335e-15	Apoc4
	Apoe	3.99567	13.4595	560.517	6.48782e-124	1.7275e-121	Apoe							Apoe	3.70232	13.6024	72.2443	1.90137e-17	6.82804e-16	Apoe
	Aqp1	-1.02701	1.5789	6.17735	0.0129396	0.0284996	Aqp1							Aqp1	-1.63647	1.38152	8.96983	0.00274475	0.00958899	Aqp1
	Arap2	2.42763	5.50285	515.001	5.17799e-114	1.24531e-111	Arap2							Arap2	2.57789	5.63788	189.039	5.15425e-43	1.21546e-40	Arap2
	Arhgap24	2.36779	5.5212	514.128	8.01877e-114	1.8979e-111	Arhgap24							Arhgap24	2.28304	5.52278	173.727	1.13551e-39	2.14217e-37	Arhgap24
	Arhgap26	2.22177	4.108	366.943	8.66743e-82	1.2924e-79	Arhgap26							Arhgap26	2.13888	4.11137	119.519	8.06227e-28	7.40734e-26	Arhgap26
	Arhgap4	-1.31494	8.19586	128.035	1.10296e-29	3.2311e-28	Arhgap4							Arhgap4	-1.28131	8.0584	61.9512	3.52067e-15	9.78663e-14	Arhgap4
	Arhgef5	1.14946	2.32412	25.3777	4.71336e-07	2.45823e-06	Arhgef5							Arhgef5	1.13388	2.46771	14.7934	0.000119952	0.000618741	Arhgef5
	Arid3b	-1.01604	6.21577	121.696	2.69039e-28	7.28065e-27	Arid3b							Arid3b	-1.11866	6.07553	60.0032	9.47038e-15	2.50461e-13	Arid3b
	Armc2	3.38406	2.00904	126.401	2.51174e-29	7.27234e-28	Armc2							Armc2	3.44523	2.09553	69.4072	8.0096e-17	2.73079e-15	Armc2
	Armc3	-1.14932	1.8018	20.4502	6.12021e-06	2.73147e-05	Armc3							Armc3	-1.41765	1.59833	20.956	4.69957e-06	3.3891e-05	Armc3
	Arnt2	4.2601	5.14025	607.099	4.78303e-134	1.4264e-131	Arnt2							Arnt2	3.90734	5.17999	364.471	2.99302e-81	2.49108e-78	Arnt2
	Arrdc4	1.88903	5.85143	293.89	7.06395e-66	7.11693e-64	Arrdc4							Arrdc4	1.97007	5.80386	139.152	4.08066e-32	4.85187e-30	Arrdc4
	Asb10	2.5272	5.65254	425.814	1.32408e-94	2.37871e-92	Asb10							Asb10	2.32601	5.55359	110.956	6.05068e-26	4.89206e-24	Asb10
	Asb11	6.64804	1.40834	163.877	1.60945e-37	6.6478e-36	Asb11							Asb11	5.17314	1.227	91.0049	1.43319e-21	7.45523e-20	Asb11
	Asb2	-1.04628	6.30461	157.655	3.68162e-36	1.47969e-34	Asb2							Asb2	-1.21903	6.17504	77.9427	1.06075e-18	4.27593e-17	Asb2
	Ascl4	2.57976	-0.227247	26.6776	2.40397e-07	1.30823e-06	Ascl4							Ascl4	3.34791	-0.256318	38.6689	5.02139e-10	7.15485e-09	Ascl4
	Atg7	1.16107	4.50089	106.733	5.09426e-25	1.15266e-23	Atg7							Atg7	1.08407	4.58436	43.8025	3.63243e-11	6.13309e-10	Atg7
	Atox1	1.39296	5.72354	152.886	4.0568e-35	1.51987e-33	Atox1							Atox1	1.21973	5.716	57.7472	2.98067e-14	7.36012e-13	Atox1
	Atp10a	2.45128	3.57081	155.607	1.03151e-35	4.02638e-34	Atp10a							Atp10a	2.73109	3.65787	59.1717	1.44496e-14	3.73079e-13	Atp10a
	Atp1a3	4.18807	7.36905	1243.15	2.55421e-272	3.80858e-269	Atp1a3							Atp1a3	3.72936	7.54315	292.984	1.11289e-65	5.24874e-63	Atp1a3
	Atp1b1	-1.05586	3.073	8.87987	0.00288332	0.0075321	Atp1b1							Atp1b1	-2.16273	2.93677	33.464	7.25935e-09	8.54829e-08	Atp1b1
	Atp1b3	1.1377	8.14163	152.529	4.85628e-35	1.8103e-33	Atp1b3							Atp1b3	1.14372	8.19708	67.4506	2.16036e-16	6.94704e-15	Atp1b3
	Atp2a1	1.66352	1.42562	38.1452	6.56728e-10	4.87916e-09	Atp2a1							Atp2a1	1.17613	1.25315	9.72534	0.00181745	0.00667577	Atp2a1
	Atp2b3	-1.13311	3.16432	12.0333	0.00052259	0.0016251	Atp2b3							Atp2b3	-1.76383	3.20839	8.52084	0.00351103	0.0118083	Atp2b3
	Atp6v0e2	1.46048	1.2701	26.0008	3.41278e-07	1.82002e-06	Atp6v0e2							Atp6v0e2	1.87773	1.30276	23.8202	1.05768e-06	8.68043e-06	Atp6v0e2
	Atp6v1a	1.30083	6.86907	184.707	4.5478e-42	2.24544e-40	Atp6v1a							Atp6v1a	1.19261	7.03982	50.174	1.40697e-12	2.83175e-11	Atp6v1a
	Atxn10	1.04854	6.8804	117.036	2.81884e-27	7.18492e-26	Atxn10							Atxn10	1.04411	6.9093	74.0021	7.80321e-18	2.90546e-16	Atxn10
	Avpr2	-1.86591	2.02577	55.7033	8.42777e-14	9.11948e-13	Avpr2							Avpr2	-1.20802	1.735	11.0326	0.000895222	0.00361384	Avpr2
	AW112010	1.09345	3.77906	52.9985	3.33803e-13	3.42555e-12	AW112010							AW112010	1.27221	3.87002	38.9889	4.26224e-10	6.12249e-09	AW112010
	Axl	4.25044	9.07937	940.548	1.50439e-206	1.1216e-203	Axl							Axl	3.80788	9.22753	223.892	1.28048e-50	4.0261e-48	Axl
	B230217C12Rik	1.97556	0.980906	42.9483	5.62063e-11	4.70574e-10	B230217C12Rik							B230217C12Rik	1.73228	0.598563	21.924	2.83666e-06	2.13262e-05	B230217C12Rik
	B2m	1.35302	11.2248	144.661	2.54767e-33	8.93842e-32	B2m							B2m	1.57654	11.4054	38.0659	6.83957e-10	9.50619e-09	B2m
	B3gnt7	1.68455	3.15595	78.9399	6.4027e-19	9.96562e-18	B3gnt7							B3gnt7	1.51077	3.17104	40.0074	2.53006e-10	3.77216e-09	B3gnt7
	B430209F14Rik	-1.14956	2.15394	28.9968	7.24963e-08	4.21933e-07	B430209F14Rik							B430209F14Rik	-1.07694	1.95223	12.4655	0.000414531	0.00183689	B430209F14Rik
	Baalc	2.26114	1.21547	23.6068	1.18167e-06	5.84992e-06	Baalc							Baalc	1.04518	0.676183	5.65893	0.0173667	0.0452415	Baalc
	Bag1	1.16257	6.47943	155.616	1.0272e-35	4.02009e-34	Bag1							Bag1	1.00016	6.48055	59.3822	1.29839e-14	3.36465e-13	Bag1
	Baiap2l2	7.52829	6.50447	2099.92	0	0	Baiap2l2							Baiap2l2	7.60185	6.42791	577.146	1.5665e-127	3.69407e-124	Baiap2l2
	Bambi	2.84977	2.9671	176.998	2.19215e-40	1.01199e-38	Bambi							Bambi	2.75626	3.06684	85.0792	2.86643e-20	1.32974e-18	Bambi
	Bank1	-2.28081	4.90167	356.449	1.67066e-79	2.3725e-77	Bank1							Bank1	-2.40586	4.92381	131.33	2.09718e-30	2.24796e-28	Bank1
	BC021767	4.61631	1.99509	113.208	1.94305e-26	4.73411e-25	BC021767							BC021767	4.70208	1.47229	61.1775	5.21534e-15	1.41093e-13	BC021767
	BC035044	-1.37746	5.51368	193.487	5.51146e-44	2.91423e-42	BC035044							BC035044	-1.41538	5.53731	69.0058	9.81754e-17	3.30734e-15	BC035044
	BC051537	-1.14232	0.786722	11.5592	0.000674159	0.00205193	BC051537							BC051537	-1.37563	0.193438	12.5265	0.000401218	0.00178848	BC051537
	Bcar3	3.38545	3.23341	219.27	1.30534e-49	8.38965e-48	Bcar3							Bcar3	3.32056	3.51939	125.495	3.96585e-29	3.89672e-27	Bcar3
	Bcas1	2.36443	2.24932	17.2865	3.21456e-05	0.000126671	Bcas1							Bcas1	1.21743	1.83542	7.66388	0.00563373	0.0175654	Bcas1
	Bcat1	-1.70156	0.39955	18.206	1.98251e-05	8.10339e-05	Bcat1							Bcat1	-3.11909	0.0739139	41.0143	1.51123e-10	2.31913e-09	Bcat1
	Bcl2	1.57347	4.65837	137.569	9.05271e-32	2.94727e-30	Bcl2							Bcl2	1.84897	4.64717	103.93	2.09617e-24	1.46102e-22	Bcl2
	Bcl2a1b	1.39032	6.54662	153.097	3.64887e-35	1.37049e-33	Bcl2a1b							Bcl2a1b	1.1999	6.59818	62.0842	3.29075e-15	9.20173e-14	Bcl2a1b
	Bcl2a1d	1.91135	3.09079	93.2677	4.56796e-22	8.64376e-21	Bcl2a1d							Bcl2a1d	1.20952	3.21033	14.0355	0.000179395	0.000881648	Bcl2a1d
	Bcl6	1.12665	5.19773	118.763	1.17997e-27	3.07598e-26	Bcl6							Bcl6	1.02043	5.18826	42.5205	6.99439e-11	1.12204e-09	Bcl6
	Bex3	1.71886	3.43461	96.1381	1.07142e-22	2.10765e-21	Bex3							Bex3	1.4416	3.26923	38.1884	6.42342e-10	8.97186e-09	Bex3
	Bhlhe40	4.18331	5.73352	1102.43	9.77612e-242	9.71811e-239	Bhlhe40							Bhlhe40	3.27813	5.93414	38.4617	5.58397e-10	7.89287e-09	Bhlhe40
	Bmp2	-1.31098	1.04397	23.1468	1.50097e-06	7.31882e-06	Bmp2							Bmp2	-1.16439	0.807665	8.11511	0.00438978	0.0142686	Bmp2
	Bnc2	-1.38505	1.34206	25.6006	4.19904e-07	2.21087e-06	Bnc2							Bnc2	-1.1646	1.08602	9.20645	0.00241163	0.00856696	Bnc2
	Bnip3	1.40441	5.73823	92.412	7.03857e-22	1.3119e-20	Bnip3							Bnip3	1.08861	5.78133	31.0864	2.46789e-08	2.67162e-07	Bnip3
	Bola2	1.18513	4.3687	49.4992	1.98454e-12	1.90913e-11	Bola2							Bola2	1.02651	4.26703	29.9404	4.45522e-08	4.64531e-07	Bola2
	Bri3bp	1.26521	5.23209	154.368	1.92404e-35	7.35625e-34	Bri3bp							Bri3bp	1.34632	5.29898	74.7518	5.33767e-18	2.00325e-16	Bri3bp
	Bst2	1.20888	6.91024	108.288	2.32414e-25	5.3729e-24	Bst2							Bst2	1.33839	7.06705	68.356	1.36493e-16	4.52279e-15	Bst2
	Btla	2.71699	2.82998	69.2897	8.50115e-17	1.14612e-15	Btla							Btla	2.45985	2.52728	42.8554	5.8939e-11	9.5634e-10	Btla
	C030034L19Rik	2.36549	2.11727	87.0461	1.06019e-20	1.81916e-19	C030034L19Rik							C030034L19Rik	2.14485	2.19961	33.8532	5.94298e-09	7.11398e-08	C030034L19Rik
	C1rl	-1.39082	2.98727	60.4581	7.51598e-15	9.00167e-14	C1rl							C1rl	-1.41784	3.01241	43.2283	4.87111e-11	8.03279e-10	C1rl
	C2	1.38866	2.61481	39.0679	4.09329e-10	3.11881e-09	C2							C2	1.83973	3.10043	50.5161	1.18193e-12	2.40968e-11	C2
	C3	3.40235	5.12632	232.157	2.01818e-52	1.41282e-50	C3							C3	2.31273	5.32873	26.0095	3.39739e-07	3.04046e-06	C3
	C330008A17Rik	3.54965	0.323008	55.5768	8.98772e-14	9.69724e-13	C330008A17Rik							C330008A17Rik	4.33125	0.0316896	52.2342	4.92597e-13	1.06085e-11	C330008A17Rik
	C77080	3.67018	3.19476	245.91	2.02347e-55	1.57145e-53	C77080							C77080	3.01531	3.57213	33.5852	6.82088e-09	8.08957e-08	C77080
	Cacna1a	2.85802	6.71924	696.31	1.89742e-153	6.2872e-151	Cacna1a							Cacna1a	2.80955	6.56157	313.329	4.11271e-70	2.32763e-67	Cacna1a
	Cacna1s	1.21607	3.09057	43.4018	4.45773e-11	3.75532e-10	Cacna1s							Cacna1s	1.19992	3.13479	29.8736	4.61154e-08	4.80122e-07	Cacna1s
	Cacnb2	-1.41352	3.42072	51.24	8.17373e-13	8.14696e-12	Cacnb2							Cacnb2	-1.38236	3.26941	32.1797	1.40552e-08	1.57831e-07	Cacnb2
	Cacnb4	2.90359	2.78564	175.314	5.11301e-40	2.30333e-38	Cacnb4							Cacnb4	2.90229	2.54273	102.274	4.835e-24	3.25764e-22	Cacnb4
	Cadm1	1.39592	8.08345	166.399	4.52703e-38	1.89614e-36	Cadm1							Cadm1	1.43869	8.01645	126.2	2.77985e-29	2.80944e-27	Cadm1
	Cadm4	1.6981	3.44333	67.7625	1.84421e-16	2.43139e-15	Cadm4							Cadm4	1.24058	3.38743	32.2774	1.33659e-08	1.50809e-07	Cadm4
	Camk2n1	-1.21469	6.22966	62.9207	2.15196e-15	2.66289e-14	Camk2n1							Camk2n1	-1.78597	6.18598	152.47	5.00096e-35	7.14733e-33	Camk2n1
	Capg	2.83785	6.6852	696.246	1.95897e-153	6.35003e-151	Capg							Capg	2.09416	6.67806	55.7259	8.33127e-14	1.95164e-12	Capg
	Capn1	1.46706	4.38919	129.85	4.42051e-30	1.32358e-28	Capn1							Capn1	1.51212	4.54814	74.8366	5.11331e-18	1.92415e-16	Capn1
	Capn5	1.20458	1.11569	19.5173	9.96915e-06	4.29748e-05	Capn5							Capn5	1.21029	1.0907	11.7009	0.000624686	0.00263526	Capn5
	Car13	1.61006	0.933738	30.8109	2.84429e-08	1.74748e-07	Car13							Car13	1.14569	1.23715	8.18056	0.00423416	0.0138646	Car13
	Card11	1.09434	4.31678	59.5665	1.18229e-14	1.39251e-13	Card11							Card11	1.23448	4.23096	36.6715	1.39811e-09	1.8436e-08	Card11
	Cass4	-1.66557	4.1453	159.062	1.81354e-36	7.32837e-35	Cass4							Cass4	-2.27628	3.99943	142.104	9.22808e-33	1.16579e-30	Cass4
	Cav1	-1.11687	1.90162	7.64937	0.00567921	0.013717	Cav1							Cav1	-1.68628	1.6135	11.6837	0.000630513	0.00265352	Cav1
	Cbr2	-1.3145	3.20436	37.2411	1.04393e-09	7.5417e-09	Cbr2							Cbr2	-1.28664	3.32565	26.6126	2.48614e-07	2.27974e-06	Cbr2
	Ccdc162	-2.10642	3.56141	137.241	1.06782e-31	3.44639e-30	Ccdc162							Ccdc162	-2.1463	3.29632	55.0816	1.1563e-13	2.67766e-12	Ccdc162
	Cck	4.43237	2.80415	247.346	9.84114e-56	7.80539e-54	Cck							Cck	3.97124	2.7932	118.503	1.34557e-27	1.21264e-25	Cck
	Ccl24	-1.44413	1.69781	28.3989	9.87219e-08	5.67261e-07	Ccl24							Ccl24	-1.42475	1.69606	10.5768	0.00114517	0.00446138	Ccl24
	Ccl3	2.80747	7.29543	128.247	9.91328e-30	2.90978e-28	Ccl3							Ccl3	2.30865	7.33092	104.723	1.40496e-24	1.01943e-22	Ccl3
	Ccl4	2.38587	7.42712	73.3749	1.07221e-17	1.52993e-16	Ccl4							Ccl4	2.11213	7.55638	71.7639	2.42548e-17	8.60103e-16	Ccl4
	Ccl6	2.26068	8.20319	366.309	1.1908e-81	1.75802e-79	Ccl6							Ccl6	1.51821	8.26095	39.2069	3.81191e-10	5.52045e-09	Ccl6
	Ccn1	-1.47181	1.01559	21.1098	4.33702e-06	1.9819e-05	Ccn1							Ccn1	-1.79526	0.533732	12.8717	0.000333596	0.00152456	Ccn1
	Ccr1l1	-2.07373	1.40487	50.7113	1.07002e-12	1.05593e-11	Ccr1l1							Ccr1l1	-2.73796	1.30924	39.2614	3.70707e-10	5.38515e-09	Ccr1l1
	Ccr2	-1.07939	4.27509	70.5791	4.42178e-17	6.10492e-16	Ccr2							Ccr2	-1.49615	4.46491	32.4608	1.21623e-08	1.38109e-07	Ccr2
	Ccr3	-2.67307	1.2539	65.1483	6.94677e-16	8.8081e-15	Ccr3							Ccr3	-3.27628	1.04222	59.6884	1.11131e-14	2.91723e-13	Ccr3
	Ccr5	-1.1271	8.94475	138.055	7.08734e-32	2.32262e-30	Ccr5							Ccr5	-1.24403	8.95147	56.3625	6.02677e-14	1.43799e-12	Ccr5
	Ccrl2	2.01556	5.55406	58.6904	1.84538e-14	2.13637e-13	Ccrl2							Ccrl2	2.02919	5.97927	42.2622	7.98208e-11	1.2704e-09	Ccrl2
	Cd163	-1.3342	4.03179	41.8358	9.92703e-11	8.10191e-10	Cd163							Cd163	-1.08101	4.29073	28.0716	1.16909e-07	1.13843e-06	Cd163
	Cd200r4	4.54192	4.7551	926.001	2.18556e-203	1.41691e-200	Cd200r4							Cd200r4	3.88829	4.82285	108.539	2.04772e-25	1.5577e-23	Cd200r4
	Cd209a	-2.19449	3.35879	69.5319	7.51889e-17	1.02108e-15	Cd209a							Cd209a	-2.2239	3.63976	54.2938	1.72648e-13	3.90847e-12	Cd209a
	Cd209b	-1.41376	1.30594	12.2572	0.000463463	0.00145926	Cd209b							Cd209b	-1.66511	1.61034	15.9273	6.58212e-05	0.000362375	Cd209b
	Cd209c	-2.16605	0.855967	23.2229	1.4427e-06	7.05779e-06	Cd209c							Cd209c	-2.34769	0.857744	34.3394	4.62926e-09	5.63193e-08	Cd209c
	Cd209f	-1.21707	3.05991	18.7132	1.51926e-05	6.35626e-05	Cd209f							Cd209f	-1.45299	3.21034	32.9655	9.38082e-09	1.08174e-07	Cd209f
	Cd209g	-1.0922	1.53093	8.94111	0.00278824	0.00730547	Cd209g							Cd209g	-1.77523	1.5656	24.8692	6.13552e-07	5.24541e-06	Cd209g
	Cd22	1.45667	6.05079	137.975	7.38184e-32	2.41383e-30	Cd22							Cd22	1.613	6.11898	140.75	1.82502e-32	2.18833e-30	Cd22
	Cd244a	1.43582	3.34714	80.3879	3.07672e-19	4.89094e-18	Cd244a							Cd244a	1.34776	3.43384	38.5062	5.45813e-10	7.73043e-09	Cd244a
	Cd274	1.31273	6.23438	180.386	3.99178e-41	1.90774e-39	Cd274							Cd274	1.39863	6.36696	141.194	1.4592e-32	1.79532e-30	Cd274
	Cd28	4.19942	3.10468	208.855	2.44171e-47	1.45633e-45	Cd28							Cd28	3.68914	3.02036	54.7164	1.39242e-13	3.1931e-12	Cd28
	Cd300c	-1.08205	-0.149937	5.48706	0.0191578	0.0401605	Cd300c							Cd300c	-1.35662	-0.274203	10.6421	0.00110541	0.00433855	Cd300c
	Cd300lb	2.11204	3.10826	152.619	4.64003e-35	1.73402e-33	Cd300lb							Cd300lb	1.31442	3.25139	8.07331	0.00449219	0.0145396	Cd300lb
	Cd300ld4	-1.53819	3.6802	67.9304	1.69367e-16	2.24284e-15	Cd300ld4							Cd300ld4	-1.68177	3.46609	63.9985	1.24516e-15	3.64003e-14	Cd300ld4
	Cd300lf	2.79676	4.35049	238.707	7.52585e-54	5.6109e-52	Cd300lf							Cd300lf	1.45769	4.47463	9.07296	0.00259417	0.00911695	Cd300lf
	Cd34	1.30897	8.08917	173.282	1.42008e-39	6.32084e-38	Cd34							Cd34	1.30727	8.1356	101.693	6.48428e-24	4.34816e-22	Cd34
	Cd38	-1.05905	1.6364	14.7287	0.000124142	0.000439584	Cd38							Cd38	-1.66855	2.38226	16.3461	5.27645e-05	0.000298387	Cd38
	Cd46	-1.09701	2.44366	21.1186	4.31716e-06	1.97343e-05	Cd46							Cd46	-1.40637	2.25051	27.1736	1.85984e-07	1.74734e-06	Cd46
	Cd5	4.38422	3.25731	384.056	1.6293e-85	2.47903e-83	Cd5							Cd5	3.85955	3.27995	198.098	5.43165e-45	1.39732e-42	Cd5
	Cd52	2.31567	7.15185	410.681	2.6056e-91	4.3169e-89	Cd52							Cd52	2.14959	7.2638	153.235	3.4031e-35	4.96396e-33	Cd52
	Cd6	3.18673	0.0140732	40.8236	1.66607e-10	1.32992e-09	Cd6							Cd6	4.28708	-0.229568	62.6665	2.44848e-15	6.9011e-14	Cd6
	Cd63	2.00397	8.96654	222.311	2.83291e-50	1.84461e-48	Cd63							Cd63	1.86697	8.95114	88.1678	6.01314e-21	2.95417e-19	Cd63
	Cd68	1.55243	9.82046	264.1	2.19204e-59	1.90032e-57	Cd68							Cd68	1.62773	9.81133	66.1339	4.21298e-16	1.30437e-14	Cd68
	Cd69	1.62696	0.991351	16.6218	4.56224e-05	0.0001756	Cd69							Cd69	1.49952	1.21934	13.7735	0.000206219	0.000996157	Cd69
	Cd72	2.29416	5.15467	261.426	8.39019e-59	7.19e-57	Cd72							Cd72	1.57027	5.14208	56.7428	4.96711e-14	1.20342e-12	Cd72
	Cd74	2.00576	9.69111	67.3156	2.31346e-16	3.03128e-15	Cd74							Cd74	2.11578	10.0518	38.4152	5.71865e-10	8.04437e-09	Cd74
	Cd83	1.38613	7.93205	231.672	2.57471e-52	1.794e-50	Cd83							Cd83	1.56744	8.12781	110.512	7.56702e-26	5.98762e-24	Cd83
	Cd9	1.33992	10.2603	127.004	1.85423e-29	5.40009e-28	Cd9							Cd9	1.18374	10.2352	32.8567	9.92104e-09	1.13939e-07	Cd9
	Cdh23	-1.29009	6.00887	151.63	7.63397e-35	2.81062e-33	Cdh23							Cdh23	-1.10828	5.97333	36.3552	1.64439e-09	2.1543e-08	Cdh23
	Cdhr4	-1.48979	1.91776	32.7265	1.06083e-08	6.86848e-08	Cdhr4							Cdhr4	-1.31925	1.50514	10.7101	0.00106551	0.00419941	Cdhr4
	Cdk1	1.66103	2.78463	64.3205	1.0574e-15	1.32942e-14	Cdk1							Cdk1	1.14537	2.68769	15.0091	0.000106994	0.000560064	Cdk1
	Cdk18	2.94479	4.2769	252.982	5.81317e-57	4.81556e-55	Cdk18							Cdk18	2.18287	4.15167	62.0791	3.2993e-15	9.20745e-14	Cdk18
	Cdk5r1	-1.07764	6.62834	188.692	6.13603e-43	3.11205e-41	Cdk5r1							Cdk5r1	-1.15216	6.47691	110.51	7.57498e-26	5.98762e-24	Cdk5r1
	Cdkn1a	1.42328	4.87384	87.1543	1.00378e-20	1.72635e-19	Cdkn1a							Cdkn1a	1.26617	5.02302	27.8261	1.32726e-07	1.27925e-06	Cdkn1a
	Cdkn2a	2.74376	1.3235	63.4893	1.61242e-15	2.01195e-14	Cdkn2a							Cdkn2a	2.83418	1.46374	49.839	1.66896e-12	3.32593e-11	Cdkn2a
	Cdkn2b	1.48821	0.101985	10.4268	0.00124202	0.00354175	Cdkn2b							Cdkn2b	1.25688	0.258744	11.7524	0.000607636	0.00257178	Cdkn2b
	Cdo1	2.37589	1.49458	43.9262	3.40988e-11	2.91041e-10	Cdo1							Cdo1	2.95906	1.46628	46.4092	9.59636e-12	1.73853e-10	Cdo1
	Cebpd	-1.22338	5.79239	216.821	4.46549e-49	2.79769e-47	Cebpd							Cebpd	-1.30009	5.74478	92.489	6.77015e-22	3.62844e-20	Cebpd
	Cenpb	1.26728	6.47135	124.364	7.01359e-29	1.96948e-27	Cenpb							Cenpb	1.01843	6.46824	31.1406	2.39997e-08	2.60407e-07	Cenpb
	Cep170b	2.02535	2.25026	66.6549	3.23451e-16	4.18661e-15	Cep170b							Cep170b	1.6851	2.14382	20.4699	6.05754e-06	4.25773e-05	Cep170b
	Cep68	-1.11582	7.00417	133.589	6.72026e-31	2.07037e-29	Cep68							Cep68	-1.17837	6.9492	110.721	6.81102e-26	5.47552e-24	Cep68
	Cfap161	4.14372	1.35081	87.5205	8.34104e-21	1.44117e-19	Cfap161							Cfap161	5.02857	1.44216	60.4492	7.55006e-15	2.008e-13	Cfap161
	Cfap74	-1.31493	6.85405	107.289	3.84798e-25	8.77327e-24	Cfap74							Cfap74	-1.00434	6.707	49.6999	1.79156e-12	3.55025e-11	Cfap74
	Cfp	-1.06821	2.74501	33.9492	5.65691e-09	3.78592e-08	Cfp							Cfp	-1.71712	3.27991	18.2038	1.9848e-05	0.000124592	Cfp
	Cgref1	-1.37462	0.969913	19.2799	1.12886e-05	4.81613e-05	Cgref1							Cgref1	-1.39816	1.04726	15.6687	7.54625e-05	0.000409558	Cgref1
	Ch25h	5.02118	5.78373	919.316	6.20642e-202	3.55938e-199	Ch25h							Ch25h	4.6737	5.79293	175.396	4.90703e-40	9.77881e-38	Ch25h
	Chd5	1.29546	1.28347	18.5617	1.64496e-05	6.84375e-05	Chd5							Chd5	1.00537	1.22185	8.42524	0.00370047	0.0123515	Chd5
	Chst10	2.86697	4.19074	451.65	3.1558e-100	6.11119e-98	Chst10							Chst10	2.85317	4.24603	148.383	3.91225e-34	5.37422e-32	Chst10
	Chst11	1.70893	6.91617	338.649	1.25639e-75	1.65788e-73	Chst11							Chst11	1.52352	6.92715	152.491	4.94837e-35	7.14434e-33	Chst11
	Chst2	4.21429	6.73188	1082.77	1.8366e-237	1.7116e-234	Chst2							Chst2	3.97596	6.72883	698.753	5.58183e-154	2.63258e-150	Chst2
	Chst3	4.177	3.2183	288.172	1.2442e-64	1.22054e-62	Chst3							Chst3	5.12548	3.16568	222.304	2.84321e-50	8.74535e-48	Chst3
	Chst7	-1.23776	5.73665	180.163	4.46546e-41	2.12052e-39	Chst7							Chst7	-1.38236	5.69457	76.207	2.55429e-18	9.8476e-17	Chst7
	Chst8	-1.51001	4.56502	143.878	3.77707e-33	1.31897e-31	Chst8							Chst8	-1.40092	4.43764	63.0589	2.00615e-15	5.73434e-14	Chst8
	Cited4	6.55735	2.74054	448.945	1.22381e-99	2.3099e-97	Cited4							Cited4	6.12794	2.93904	149.728	1.98777e-34	2.78464e-32	Cited4
	Clcf1	-1.24035	5.81476	148.143	4.41458e-34	1.59e-32	Clcf1							Clcf1	-1.04637	5.57554	41.8442	9.88412e-11	1.55562e-09	Clcf1
	Cldn2	-1.11697	1.30179	7.31133	0.00685212	0.0162126	Cldn2							Cldn2	-1.45045	1.22374	7.6686	0.00561901	0.0175302	Cldn2
	Clec10a	-1.02615	3.22314	12.7829	0.0003498	0.00112881	Clec10a							Clec10a	-1.84702	3.618	44.1958	2.97112e-11	5.05876e-10	Clec10a
	Clec12a	-1.18442	2.65587	29.3649	5.99546e-08	3.53074e-07	Clec12a							Clec12a	-1.69558	2.83611	22.6825	1.91096e-06	1.48155e-05	Clec12a
	Clec1a	2.5496	2.95292	145.589	1.59685e-33	5.66919e-32	Clec1a							Clec1a	2.52519	3.21723	80.7847	2.51698e-19	1.06945e-17	Clec1a
	Clec4a1	-1.30155	2.78192	54.0364	1.9681e-13	2.05795e-12	Clec4a1							Clec4a1	-1.77549	2.80538	49.1949	2.31747e-12	4.53525e-11	Clec4a1
	Clec4a2	-1.74374	5.16551	236.101	2.78564e-53	2.02618e-51	Clec4a2							Clec4a2	-1.94223	5.1716	174.558	7.4758e-40	1.4691e-37	Clec4a2
	Clec4a3	-1.45356	5.4485	165.603	6.75384e-38	2.82091e-36	Clec4a3							Clec4a3	-1.42657	5.45607	101.132	8.6036e-24	5.68843e-22	Clec4a3
	Clec7a	4.30763	8.53338	978.938	6.7977e-215	5.33477e-212	Clec7a							Clec7a	3.61484	8.64767	121.632	2.77826e-28	2.62064e-26	Clec7a
	Clic4	2.19633	5.68063	197.251	8.3122e-45	4.4907e-43	Clic4							Clic4	1.50248	5.7737	25.9506	3.50263e-07	3.1287e-06	Clic4
	Cmah	-1.13576	1.64247	14.0075	0.000182086	0.000623012	Cmah							Cmah	-1.71805	1.81456	19.8658	8.30713e-06	5.65628e-05	Cmah
	Cmpk2	1.53322	3.28918	32.5707	1.14934e-08	7.40617e-08	Cmpk2							Cmpk2	1.66485	3.44763	33.0618	8.92769e-09	1.0337e-07	Cmpk2
	Cnn2	-1.13875	4.01892	72.5225	1.65136e-17	2.31859e-16	Cnn2							Cnn2	-1.43088	4.09643	55.6671	8.5842e-14	2.00425e-12	Cnn2
	Cnn3	1.96073	2.95401	49.0211	2.53225e-12	2.40346e-11	Cnn3							Cnn3	1.60237	2.95608	33.636	6.64513e-09	7.92097e-08	Cnn3
	Coa5	1.00331	6.62796	122.674	1.64355e-28	4.48846e-27	Coa5							Coa5	1.04404	6.71618	83.3717	6.79871e-20	3.06353e-18	Coa5
	Col11a2	-1.04274	2.82713	24.8358	6.24265e-07	3.20317e-06	Col11a2							Col11a2	-1.42382	2.73246	20.5955	5.67289e-06	4.01529e-05	Col11a2
	Col27a1	-1.08376	8.64354	113.097	2.05456e-26	4.99763e-25	Col27a1							Col27a1	-1.06577	8.55777	43.434	4.38509e-11	7.28224e-10	Col27a1
	Col6a3	-1.86181	6.72377	112.399	2.92154e-26	7.03766e-25	Col6a3							Col6a3	-1.98845	6.49962	87.3908	8.90618e-21	4.31553e-19	Col6a3
	Col8a1	-1.3867	1.62415	12.5483	0.000396561	0.00126592	Col8a1							Col8a1	-1.9965	1.59217	15.638	7.66968e-05	0.000415301	Col8a1
	Col9a2	2.50555	1.81886	104.625	1.47568e-24	3.25983e-23	Col9a2							Col9a2	2.65365	1.68603	49.4233	2.06283e-12	4.05374e-11	Col9a2
	Colec12	3.9664	4.7844	211.737	5.74134e-48	3.50857e-46	Colec12							Colec12	3.99314	4.93248	101.649	6.62863e-24	4.42399e-22	Colec12
	Corin	3.83121	1.09887	101.431	7.40147e-24	1.56766e-22	Corin							Corin	3.97077	0.875678	64.4699	9.80203e-16	2.91363e-14	Corin
	Coro1c	1.38032	6.72504	232.56	1.64868e-52	1.15959e-50	Coro1c							Coro1c	1.23486	6.71171	69.1789	8.9925e-17	3.0439e-15	Coro1c
	Cox6a1	1.21434	6.83239	122.6	1.70554e-28	4.64924e-27	Cox6a1							Cox6a1	1.07446	6.80743	40.9486	1.5629e-10	2.39323e-09	Cox6a1
	Cox6a2	4.66143	5.14889	480.356	1.78753e-106	3.86288e-104	Cox6a2							Cox6a2	4.24517	4.98126	486.937	6.61049e-108	1.03924e-104	Cox6a2
	Cox7a2l	1.21785	7.31977	109.197	1.46897e-25	3.42248e-24	Cox7a2l							Cox7a2l	1.18712	7.35432	73.5131	9.99683e-18	3.69308e-16	Cox7a2l
	Cpd	2.24751	7.77456	429.831	1.76897e-95	3.21672e-93	Cpd							Cpd	1.87501	7.77153	123.335	1.17787e-28	1.12606e-26	Cpd
	Cpe	3.71479	5.68568	68.4497	1.30154e-16	1.739e-15	Cpe							Cpe	2.16019	5.15026	36.0211	1.95194e-09	2.5268e-08	Cpe
	Cpeb1	3.84073	4.41469	603.785	2.51522e-133	7.35382e-131	Cpeb1							Cpeb1	3.71226	4.34036	276.736	3.86204e-62	1.65588e-59	Cpeb1
	Cpq	2.86043	5.3217	392.062	2.94444e-87	4.57339e-85	Cpq							Cpq	2.92567	5.50347	449.239	1.0562e-99	1.35857e-96	Cpq
	Creb3l1	1.32364	2.07112	27.3341	1.71168e-07	9.55195e-07	Creb3l1							Creb3l1	1.23003	2.16422	16.6485	4.49864e-05	0.000260439	Creb3l1
	Creb3l2	1.12279	5.9089	86.3479	1.50906e-20	2.56868e-19	Creb3l2							Creb3l2	1.33823	6.051	60.9427	5.87609e-15	1.57762e-13	Creb3l2
	Creg1	1.01967	8.73096	106.505	5.71371e-25	1.28503e-23	Creg1							Creg1	1.04123	8.79749	49.1687	2.34872e-12	4.59005e-11	Creg1
	Creg2	2.8004	1.37772	88.8003	4.36752e-21	7.67973e-20	Creg2							Creg2	1.58308	1.30747	8.86017	0.00291461	0.0100754	Creg2
	Crem	1.02432	3.31486	39.9017	2.67067e-10	2.08669e-09	Crem							Crem	1.39141	3.48465	34.7059	3.8347e-09	4.73449e-08	Crem
	Crip1	2.2786	3.72276	78.4185	8.33675e-19	1.28552e-17	Crip1							Crip1	1.32123	3.56218	9.62332	0.00192122	0.00701325	Crip1
	Crlf2	2.1707	8.06631	397.746	1.70464e-88	2.73311e-86	Crlf2							Crlf2	2.02058	8.08802	148.725	3.29405e-34	4.56936e-32	Crlf2
	Crppa	1.49584	0.143551	11.3446	0.000756691	0.00227114	Crppa							Crppa	1.28999	0.0720733	11.3157	0.000768526	0.00316009	Crppa
	Cryba4	-1.17622	5.06846	148.747	3.25693e-34	1.18161e-32	Cryba4							Cryba4	-1.22862	5.00208	100.415	1.23599e-23	8.09632e-22	Cryba4
	Crybb1	-2.06722	7.16824	461.424	2.35555e-102	4.81146e-100	Crybb1							Crybb1	-1.84218	7.18854	256.702	8.9833e-58	3.53069e-55	Crybb1
	Csad	-1.05067	6.59778	122.972	1.41417e-28	3.87624e-27	Csad							Csad	-1.07343	6.41641	73.9043	8.19988e-18	3.04515e-16	Csad
	Csf1	4.31897	8.67278	1163.37	5.57611e-255	6.3958e-252	Csf1							Csf1	4.00113	8.62637	232.675	1.55586e-52	5.24141e-50	Csf1
	Cspg4	5.20811	5.82208	214.889	1.17809e-48	7.289e-47	Cspg4							Cspg4	5.05734	5.53465	309.435	2.8997e-69	1.51955e-66	Cspg4
	Cst7	7.39004	9.83416	1842.58	0	0	Cst7							Cst7	7.11336	9.89084	512.134	2.17715e-113	4.40065e-110	Cst7
	Ctla2a	5.13006	2.60994	183.22	9.60256e-42	4.69455e-40	Ctla2a							Ctla2a	4.36124	2.63585	53.6139	2.44025e-13	5.43734e-12	Ctla2a
	Ctnna3	5.59054	2.10277	242.391	1.18411e-54	9.05446e-53	Ctnna3							Ctnna3	7.71033	2.12663	208.822	2.48245e-47	7.16819e-45	Ctnna3
	Ctnnd2	-1.79586	3.16304	62.1804	3.13394e-15	3.84294e-14	Ctnnd2							Ctnnd2	-2.34534	3.19989	63.763	1.40326e-15	4.06027e-14	Ctnnd2
	Ctsa	1.03934	10.6556	124.592	6.24972e-29	1.75829e-27	Ctsa							Ctsa	1.10355	10.6517	25.0342	5.63237e-07	4.84158e-06	Ctsa
	Ctsb	1.81724	12.4765	264.742	1.58792e-59	1.39279e-57	Ctsb							Ctsb	1.79866	12.5429	32.8806	9.79946e-09	1.12726e-07	Ctsb
	Ctsd	1.80873	14.1591	326.423	5.77988e-73	7.12263e-71	Ctsd							Ctsd	1.94612	14.223	26.8656	2.18112e-07	2.01967e-06	Ctsd
	Ctse	5.50466	5.30578	815.513	2.28676e-179	1.03327e-176	Ctse							Ctse	5.1408	5.40317	430.345	1.367e-95	1.48782e-92	Ctse
	Ctsl	1.73846	10.5044	275.717	6.44042e-62	6.00207e-60	Ctsl							Ctsl	1.40153	10.5553	29.7503	4.91441e-08	5.07547e-07	Ctsl
	Ctsz	1.51461	11.0432	200.518	1.6101e-45	8.95827e-44	Ctsz							Ctsz	1.52393	11.0419	37.6645	8.40209e-10	1.15419e-08	Ctsz
	Cxcl13	2.32746	2.03299	20.5752	5.7333e-06	2.57188e-05	Cxcl13							Cxcl13	1.24652	2.29614	7.50613	0.00614892	0.018938	Cxcl13
	Cxcl14	3.6843	3.69101	257.333	6.54385e-58	5.48176e-56	Cxcl14							Cxcl14	2.14472	4.0208	22.8552	1.7468e-06	1.36549e-05	Cxcl14
	Cxcr4	2.82766	4.7834	347.913	1.20659e-77	1.63559e-75	Cxcr4							Cxcr4	2.02489	5.2115	15.8697	6.78576e-05	0.000372572	Cxcr4
	Cybb	2.2994	6.73237	203.854	3.01205e-46	1.76128e-44	Cybb							Cybb	1.72702	7.05354	36.1586	1.81896e-09	2.36984e-08	Cybb
	Cyp51	1.85792	4.80496	200.873	1.34659e-45	7.52021e-44	Cyp51							Cyp51	1.4721	4.70122	75.0148	4.67206e-18	1.76751e-16	Cyp51
	Cytip	1.43305	3.83851	92.2342	7.70008e-22	1.43162e-20	Cytip							Cytip	1.07125	3.99047	16.4551	4.98169e-05	0.000283724	Cytip
	D930028M14Rik	-1.53431	1.24003	29.6945	5.05782e-08	3.01307e-07	D930028M14Rik							D930028M14Rik	-1.74997	0.698805	16.715	4.34356e-05	0.000252494	D930028M14Rik
	Daam1	1.10657	5.2973	89.6996	2.77214e-21	4.9682e-20	Daam1							Daam1	1.26778	5.41199	118.131	1.62302e-27	1.45342e-25	Daam1
	Dab1	2.97646	1.0417	53.7216	2.31006e-13	2.40372e-12	Dab1							Dab1	2.62464	0.880125	46.346	9.91109e-12	1.79118e-10	Dab1
	Dact1	2.56906	3.53512	201.533	9.6665e-46	5.43914e-44	Dact1							Dact1	2.78177	3.52359	174.229	8.82365e-40	1.68711e-37	Dact1
	Dact3	-1.13573	3.04341	37.9391	7.29895e-10	5.38519e-09	Dact3							Dact3	-1.15823	2.8682	18.4355	1.75753e-05	0.000111813	Dact3
	Dcstamp	7.21588	3.87501	935.924	1.52232e-205	1.03179e-202	Dcstamp							Dcstamp	5.4944	3.8838	52.4177	4.48654e-13	9.69162e-12	Dcstamp
	Ddah1	2.84591	0.873894	34.5902	4.06953e-09	2.76324e-08	Ddah1							Ddah1	1.42133	0.599337	10.4999	0.00119384	0.00462658	Ddah1
	Ddx31	1.26012	5.67549	174.947	6.15003e-40	2.76214e-38	Ddx31							Ddx31	1.48513	5.75213	90.7868	1.60019e-21	8.29346e-20	Ddx31
	Dgat2	1.9759	1.71337	50.1453	1.42773e-12	1.38871e-11	Dgat2							Dgat2	1.85629	1.86702	23.0489	1.57936e-06	1.24909e-05	Dgat2
	Dgki	1.88764	1.0735	35.2766	2.86052e-09	1.97079e-08	Dgki							Dgki	1.7542	1.08597	22.2981	2.33442e-06	1.78154e-05	Dgki
	Dgkz	1.22632	8.19092	173.386	1.34828e-39	6.01923e-38	Dgkz							Dgkz	1.27393	8.22387	94.6917	2.22469e-22	1.26924e-20	Dgkz
	Dhcr24	1.81656	3.04062	49.0532	2.4911e-12	2.36742e-11	Dhcr24							Dhcr24	1.27332	2.82009	22.896	1.71007e-06	1.34197e-05	Dhcr24
	Dhcr7	1.37384	5.23646	212.777	3.4047e-48	2.09783e-46	Dhcr7							Dhcr7	1.13685	5.13067	77.8444	1.11484e-18	4.46853e-17	Dhcr7
	Dhx32	1.09604	5.51875	143.156	5.43506e-33	1.87164e-31	Dhx32							Dhx32	1.02212	5.51216	57.2458	3.84601e-14	9.44742e-13	Dhx32
	Dio2	4.42864	1.52457	73.2906	1.11897e-17	1.59056e-16	Dio2							Dio2	1.6926	1.36934	14.9104	0.000112743	0.000586345	Dio2
	Dipk2a	1.08894	5.36674	164.643	1.09484e-37	4.54738e-36	Dipk2a							Dipk2a	1.22171	5.4083	109.135	1.51607e-25	1.17862e-23	Dipk2a
	Dkk2	8.91344	5.19959	1595.3	0	0	Dkk2							Dkk2	8.88536	5.41956	446.031	5.27224e-99	6.21641e-96	Dkk2
	Dlc1	-1.21225	3.60571	48.8763	2.72629e-12	2.57459e-11	Dlc1							Dlc1	-1.21167	3.45151	34.4043	4.47729e-09	5.45643e-08	Dlc1
	Dll1	1.61433	2.87123	54.5378	1.52484e-13	1.61369e-12	Dll1							Dll1	1.29715	2.57215	17.46	2.93413e-05	0.000177338	Dll1
	Dmc1	2.45147	-0.150606	29.7628	4.88268e-08	2.91222e-07	Dmc1							Dmc1	1.42188	-0.150572	13.8533	0.000197651	0.000961351	Dmc1
	Dna2	1.88552	4.71738	168.703	1.42023e-38	6.1029e-37	Dna2							Dna2	1.41184	4.54655	92.8356	5.68227e-22	3.0804e-20	Dna2
	Dnajb14	1.4718	6.79564	316.113	1.01766e-70	1.1763e-68	Dnajb14							Dnajb14	1.45563	6.93432	160.162	1.0427e-36	1.63924e-34	Dnajb14
	Dok3	-1.5778	5.87576	198.065	5.52218e-45	3.01616e-43	Dok3							Dok3	-1.8612	5.75036	104.058	1.96455e-24	1.38291e-22	Dok3
	Dpp4	-1.40127	0.378042	12.5267	0.00040118	0.00127957	Dpp4							Dpp4	-2.22391	0.67909	17.9783	2.23433e-05	0.000138261	Dpp4
	Dpp7	1.89028	6.90812	415.222	2.67643e-92	4.58716e-90	Dpp7							Dpp7	1.93239	6.95725	154.226	2.06659e-35	3.04585e-33	Dpp7
	Dram1	2.49676	1.35677	77.2628	1.49658e-18	2.26783e-17	Dram1							Dram1	1.52694	1.48175	12.6384	0.000377906	0.001698	Dram1
	Drc7	-1.247	1.21147	6.82422	0.008993	0.0206109	Drc7							Drc7	-1.83276	1.14983	16.1808	5.75751e-05	0.000322626	Drc7
	Dtnbp1	1.01221	5.67	103.915	2.11212e-24	4.62465e-23	Dtnbp1							Dtnbp1	1.03046	5.62287	58.0173	2.59829e-14	6.4724e-13	Dtnbp1
	Dubr	1.2336	3.18234	42.8195	6.00322e-11	5.00918e-10	Dubr							Dubr	1.28984	3.25921	30.7876	2.87866e-08	3.08328e-07	Dubr
	Duoxa1	-2.19891	1.70509	32.2933	1.32568e-08	8.49107e-08	Duoxa1							Duoxa1	-2.54384	1.56182	40.205	2.28665e-10	3.43094e-09	Duoxa1
	Dusp3	1.05254	6.66512	140.448	2.12429e-32	7.07037e-31	Dusp3							Dusp3	1.1373	6.62331	57.0812	4.18174e-14	1.01662e-12	Dusp3
	E330020D12Rik	-1.35249	3.5254	71.1684	3.27991e-17	4.5622e-16	E330020D12Rik							E330020D12Rik	-1.05139	3.25855	26.7424	2.32468e-07	2.1428e-06	E330020D12Rik
	Ear2	-1.48622	0.587932	10.1446	0.00144728	0.00406334	Ear2							Ear2	-2.52647	0.788878	24.6869	6.74419e-07	5.72427e-06	Ear2
	Echs1	1.17307	6.25815	134.548	4.14668e-31	1.28815e-29	Echs1							Echs1	1.14705	6.23029	62.861	2.21816e-15	6.32757e-14	Echs1
	Ecrg4	-1.37875	1.91102	10.8691	0.000977809	0.00286278	Ecrg4							Ecrg4	-2.18553	1.94388	14.7568	0.000122305	0.000629956	Ecrg4
	Ecscr	-1.84313	6.57157	400.224	4.92136e-89	8.064e-87	Ecscr							Ecscr	-2.20974	6.31896	162.941	2.57652e-37	4.14263e-35	Ecscr
	Eef1a1	1.5631	12.3276	200.978	1.27776e-45	7.16269e-44	Eef1a1							Eef1a1	1.4864	12.4384	23.4538	1.27951e-06	1.03156e-05	Eef1a1
	Eef1a1-ps1	1.3617	1.05469	21.1614	4.22183e-06	1.93222e-05	Eef1a1-ps1							Eef1a1-ps1	1.3895	1.18878	14.4374	0.000144893	0.000731394	Eef1a1-ps1
	Eef1b2	1.24618	7.84209	118.341	1.4603e-27	3.77374e-26	Eef1b2							Eef1b2	1.10203	7.88339	51.3449	7.74846e-13	1.62179e-11	Eef1b2
	Eef1g	1.21913	7.65483	138.878	4.68299e-32	1.54487e-30	Eef1g							Eef1g	1.12672	7.67635	69.08	9.45495e-17	3.1928e-15	Eef1g
	Eef2	1.23106	10.6273	149.743	1.97294e-34	7.22813e-33	Eef2							Eef2	1.19621	10.7109	27.3674	1.68244e-07	1.59123e-06	Eef2
	Eef2k	-1.0435	7.63722	112.491	2.78874e-26	6.73954e-25	Eef2k							Eef2k	-1.09353	7.60027	49.8697	1.64298e-12	3.27878e-11	Eef2k
	Eepd1	1.5184	5.04694	175.401	4.89406e-40	2.21138e-38	Eepd1							Eepd1	1.76465	5.15246	102.495	4.32375e-24	2.95539e-22	Eepd1
	Efcab6	-1.70181	1.16116	26.0609	3.30816e-07	1.76803e-06	Efcab6							Efcab6	-1.66643	0.957708	21.2455	4.04059e-06	2.94693e-05	Efcab6
	Efemp2	1.32423	4.31306	110.603	7.22988e-26	1.70308e-24	Efemp2							Efemp2	1.27593	4.31177	59.4106	1.27977e-14	3.32248e-13	Efemp2
	Efna5	2.21356	1.3598	48.466	3.36064e-12	3.14172e-11	Efna5							Efna5	3.00007	1.26781	65.962	4.59698e-16	1.41705e-14	Efna5
	Efnb1	-1.09356	5.24493	140.576	1.99194e-32	6.65961e-31	Efnb1							Efnb1	-1.02212	5.20828	48.5283	3.25562e-12	6.22484e-11	Efnb1
	Efnb2	-1.04681	2.51683	21.61	3.34114e-06	1.55057e-05	Efnb2							Efnb2	-1.18256	2.37729	17.2589	3.26169e-05	0.000195219	Efnb2
	Efr3b	4.32364	5.43476	333.972	1.31109e-74	1.69997e-72	Efr3b							Efr3b	3.93727	5.42336	357.073	1.22158e-79	9.09694e-77	Efr3b
	Egln3	5.3773	5.39224	1301.5	5.32848e-285	8.8281e-282	Egln3							Egln3	4.35746	5.54771	89.0633	3.82387e-21	1.9118e-19	Egln3
	Egr2	1.32581	5.56054	31.2055	2.3211e-08	1.44499e-07	Egr2							Egr2	1.37508	5.47047	27.0939	1.93812e-07	1.81246e-06	Egr2
	Eif3f	1.21997	7.48757	154.542	1.76315e-35	6.77585e-34	Eif3f							Eif3f	1.26116	7.52223	96.8806	7.36372e-23	4.4148e-21	Eif3f
	Eif3h	1.14322	6.91377	120.656	4.5445e-28	1.22095e-26	Eif3h							Eif3h	1.15942	6.9784	73.3789	1.07004e-17	3.93245e-16	Eif3h
	Eif4b	1.16948	8.1978	128.272	9.78672e-30	2.8783e-28	Eif4b							Eif4b	1.17503	8.28256	68.7516	1.1168e-16	3.72679e-15	Eif4b
	Eml2	2.01943	3.7709	137.031	1.187e-31	3.81452e-30	Eml2							Eml2	1.6529	3.73609	63.2893	1.78467e-15	5.12197e-14	Eml2
	Eno1b	1.243	2.59914	40.7163	1.76016e-10	1.39902e-09	Eno1b							Eno1b	1.00238	2.82607	12.6572	0.000374126	0.00168315	Eno1b
	Enpp1	1.64293	4.81633	202.52	5.88677e-46	3.37606e-44	Enpp1							Enpp1	1.79666	4.81073	156.698	5.96006e-36	9.16618e-34	Enpp1
	Enpp5	-1.40344	3.12348	42.1659	8.38503e-11	6.90388e-10	Enpp5							Enpp5	-1.62045	2.99016	40.1554	2.34536e-10	3.50788e-09	Enpp5
	Ephx1	2.17139	6.09299	319.403	1.95367e-71	2.3305e-69	Ephx1							Ephx1	1.96031	6.01577	171.613	3.28829e-39	5.88936e-37	Ephx1
	Epn2	-1.03518	4.95461	120.409	5.14784e-28	1.37316e-26	Epn2							Epn2	-1.16429	4.86893	86.8555	1.16749e-20	5.54321e-19	Epn2
	Eps8	-1.2072	2.84574	54.3937	1.6409e-13	1.72915e-12	Eps8							Eps8	-1.43794	2.97605	31.531	1.96281e-08	2.15955e-07	Eps8
	Erc1	1.10088	2.19132	24.2623	8.40692e-07	4.24359e-06	Erc1							Erc1	1.41982	2.31492	18.0739	2.12492e-05	0.000132622	Erc1
	Ermap	-1.06494	3.36723	55.3018	1.03376e-13	1.10975e-12	Ermap							Ermap	-1.08847	3.17224	29.1863	6.5744e-08	6.65134e-07	Ermap
	Esrrg	1.44182	1.24047	27.8898	1.28426e-07	7.27565e-07	Esrrg							Esrrg	1.14961	1.10861	8.96798	0.00274753	0.0095916	Esrrg
	Etl4	5.29406	5.94757	1576.98	0	0	Etl4							Etl4	5.51334	6.05529	500.507	7.37346e-111	1.30409e-107	Etl4
	Etv1	-1.05826	4.79514	86.8015	1.19979e-20	2.05162e-19	Etv1							Etv1	-1.03179	4.73292	37.7849	7.89915e-10	1.09252e-08	Etv1
	Etv4	2.31595	2.50706	82.7427	9.34588e-20	1.52803e-18	Etv4							Etv4	2.1448	2.18504	54.8368	1.30968e-13	3.01311e-12	Etv4
	F13a1	-1.0578	4.9063	24.8697	6.13373e-07	3.15162e-06	F13a1							F13a1	-1.29448	5.17205	33.3969	7.51446e-09	8.8161e-08	F13a1
	F2r	3.3792	1.45636	88.3708	5.42648e-21	9.47473e-20	F2r							F2r	2.94139	1.40787	31.6024	1.89199e-08	2.08694e-07	F2r
	F5	-1.12568	2.81141	12.6171	0.000382245	0.00122231	F5							F5	-1.77938	2.86618	15.0633	0.000103964	0.000547037	F5
	F630028O10Rik	-1.61008	0.817778	20.0772	7.43788e-06	3.2735e-05	F630028O10Rik							F630028O10Rik	-2.14399	0.918442	22.5399	2.05823e-06	1.58789e-05	F630028O10Rik
	F630206G17Rik	2.08306	0.368685	26.642	2.44866e-07	1.32929e-06	F630206G17Rik							F630206G17Rik	2.00486	0.194022	16.7572	4.24815e-05	0.000247456	F630206G17Rik
	Fabp3	6.04731	4.32308	918.844	7.85866e-202	4.18502e-199	Fabp3							Fabp3	6.18097	4.35145	405.46	3.56685e-90	3.60481e-87	Fabp3
	Fabp5	6.78969	6.36507	1690.12	0	0	Fabp5							Fabp5	2.7779	6.53443	7.19035	0.00732966	0.0220092	Fabp5
	Fads6	-1.39835	3.75176	87.1671	9.97281e-21	1.71714e-19	Fads6							Fads6	-1.57715	3.68163	68.3229	1.38802e-16	4.58856e-15	Fads6
	Fam107a	2.81349	3.44922	38.2794	6.13059e-10	4.57066e-09	Fam107a							Fam107a	1.35177	2.85291	24.8868	6.07972e-07	5.20084e-06	Fam107a
	Fam110a	-1.5628	5.35756	241.742	1.63998e-54	1.24764e-52	Fam110a							Fam110a	-1.68285	5.24879	118.691	1.2241e-27	1.11024e-25	Fam110a
	Fam181b	-1.8578	0.551832	20.8863	4.87367e-06	2.21289e-05	Fam181b							Fam181b	-2.31398	0.555828	27.128	1.9042e-07	1.78664e-06	Fam181b
	Fam189a2	3.83175	2.67057	138.797	4.87785e-32	1.6056e-30	Fam189a2							Fam189a2	4.00943	2.81863	144.653	2.55709e-33	3.38134e-31	Fam189a2
	Fam20c	4.00648	6.64242	1163.94	4.19019e-255	5.20667e-252	Fam20c							Fam20c	3.20987	6.74277	74.8874	4.98345e-18	1.88029e-16	Fam20c
	Fam72a	-1.60969	4.77015	173.168	1.50443e-39	6.67635e-38	Fam72a							Fam72a	-1.56834	4.5557	95.86	1.23304e-22	7.20923e-21	Fam72a
	Fam78b	1.92393	0.901152	40.7926	1.69274e-10	1.34975e-09	Fam78b							Fam78b	1.48208	1.2164	13.6226	0.000223479	0.00107005	Fam78b
	Fam83g	-1.03525	2.04596	25.0015	5.72852e-07	2.95769e-06	Fam83g							Fam83g	-1.5538	1.77467	22.8818	1.72274e-06	1.34993e-05	Fam83g
	Fasn	1.47081	5.92685	219.048	1.45864e-49	9.33465e-48	Fasn							Fasn	1.39583	5.9354	111.379	4.88715e-26	4.02025e-24	Fasn
	Fau	1.26699	8.99493	76.8132	1.87914e-18	2.8189e-17	Fau							Fau	1.1395	8.97363	42.9328	5.66541e-11	9.235e-10	Fau
	Fblim1	1.00233	6.05047	123.303	1.1972e-28	3.28757e-27	Fblim1							Fblim1	1.12871	6.08652	52.7073	3.87155e-13	8.46654e-12	Fblim1
	Fbln1	-1.30792	0.768456	12.7124	0.000363235	0.00116703	Fbln1							Fbln1	-1.46634	0.682573	14.5119	0.000139276	0.000706061	Fbln1
	Fbn2	3.70346	1.61392	77.2315	1.52051e-18	2.30176e-17	Fbn2							Fbn2	4.43428	1.45922	113.345	1.81359e-26	1.50944e-24	Fbn2
	Fbxw10	-1.26624	2.48666	43.8772	3.49637e-11	2.97891e-10	Fbxw10							Fbxw10	-1.39059	2.39455	23.4801	1.26215e-06	1.01872e-05	Fbxw10
	Fcho1	1.3463	2.10378	36.1391	1.83724e-09	1.29589e-08	Fcho1							Fcho1	1.13298	1.95945	12.549	0.000396418	0.00176993	Fcho1
	Fcrl1	-1.06777	5.33919	115.3	6.76652e-27	1.69288e-25	Fcrl1							Fcrl1	-1.06945	5.29161	63.487	1.61432e-15	4.6425e-14	Fcrl1
	Fdps	1.4371	4.25333	140.715	1.85693e-32	6.22218e-31	Fdps							Fdps	1.07114	4.16828	42.603	6.70572e-11	1.07695e-09	Fdps
	Fgd2	-1.25196	9.29188	143.207	5.29656e-33	1.82817e-31	Fgd2							Fgd2	-1.26045	9.17373	38.3851	5.8073e-10	8.15963e-09	Fgd2
	Fgf1	3.37919	4.43257	727.762	2.74731e-160	9.75361e-158	Fgf1							Fgf1	3.38522	4.48588	275.846	6.03775e-62	2.51259e-59	Fgf1
	Fgf11	-2.07093	4.47071	207.375	5.13552e-47	3.01479e-45	Fgf11							Fgf11	-2.08584	4.29791	127.408	1.51256e-29	1.57362e-27	Fgf11
	Fgf13	2.48321	4.29078	413.548	6.19122e-92	1.04906e-89	Fgf13							Fgf13	2.45388	4.21441	163.275	2.17812e-37	3.58351e-35	Fgf13
	Fgf2	1.20496	4.3798	83.9955	4.95895e-20	8.25255e-19	Fgf2							Fgf2	1.59762	4.32891	83.572	6.14358e-20	2.79503e-18	Fgf2
	Fgl2	1.76368	6.09644	117.883	1.83957e-27	4.72115e-26	Fgl2							Fgl2	1.86121	6.48181	87.1275	1.01744e-20	4.89177e-19	Fgl2
	Fgr	2.36566	4.9669	311.557	1.00032e-69	1.12149e-67	Fgr							Fgr	1.37594	4.97949	22.1576	2.51154e-06	1.9095e-05	Fgr
	Filip1l	-1.4836	5.73811	211.28	7.22091e-48	4.37687e-46	Filip1l							Filip1l	-1.36375	5.6365	56.2058	6.5269e-14	1.54948e-12	Filip1l
	Fkbp10	1.15576	0.426099	7.85153	0.00507778	0.0124224	Fkbp10							Fkbp10	1.52787	0.188635	16.4991	4.86741e-05	0.000278146	Fkbp10
	Flt1	3.24267	6.41926	49.0818	2.45509e-12	2.33617e-11	Flt1							Flt1	3.62795	6.63615	75.6431	3.39864e-18	1.29966e-16	Flt1
	Flt3	-1.27581	2.01678	27.4252	1.63291e-07	9.14664e-07	Flt3							Flt3	-1.74307	1.90627	23.8017	1.06789e-06	8.75413e-06	Flt3
	Fmn1	1.78302	5.02281	274.081	1.46359e-61	1.34713e-59	Fmn1							Fmn1	1.92696	5.134	132.388	1.23061e-30	1.3819e-28	Fmn1
	Fndc4	1.5711	2.89619	74.5006	6.06207e-18	8.73348e-17	Fndc4							Fndc4	1.78024	2.89472	37.3178	1.00366e-09	1.35892e-08	Fndc4
	Foxd2	1.00762	0.642467	10.3491	0.00129538	0.00367905	Foxd2							Foxd2	1.00688	0.75912	8.39488	0.00376279	0.0125329	Foxd2
	Foxd2os	1.14971	0.224041	8.48595	0.003579	0.00912247	Foxd2os							Foxd2os	1.05197	0.0390562	8.06385	0.00451573	0.0146041	Foxd2os
	Foxred2	-1.26017	1.26295	15.4713	8.37666e-05	0.000305763	Foxred2							Foxred2	-1.27127	1.3891	7.95124	0.00480545	0.0153551	Foxred2
	Frmpd4	-1.21489	1.18793	18.4522	1.74222e-05	7.21617e-05	Frmpd4							Frmpd4	-1.49349	1.04542	15.1012	0.000101899	0.000537573	Frmpd4
	Fth1	1.71018	10.5689	312.044	7.83281e-70	8.8481e-68	Fth1							Fth1	1.47542	10.7843	23.1882	1.46899e-06	1.16834e-05	Fth1
	Fuca1	1.12085	7.31829	134.654	3.93001e-31	1.22339e-29	Fuca1							Fuca1	1.14539	7.35555	87.8272	7.14301e-21	3.49711e-19	Fuca1
	Fxyd5	2.1173	4.89328	237.31	1.51782e-53	1.1204e-51	Fxyd5							Fxyd5	1.11012	5.05954	6.6894	0.00969879	0.0278976	Fxyd5
	Fxyd6	4.24209	2.42968	228.403	1.3293e-51	9.1342e-50	Fxyd6							Fxyd6	4.50066	2.38391	142.952	6.02101e-33	7.74466e-31	Fxyd6
	Fyn	1.79354	5.25718	240.439	3.15488e-54	2.36394e-52	Fyn							Fyn	1.73157	5.28696	176.559	2.73387e-40	5.52593e-38	Fyn
	Fzd7	1.39516	6.00266	117.738	1.97879e-27	5.06971e-26	Fzd7							Fzd7	1.09068	6.18652	43.684	3.85913e-11	6.49261e-10	Fzd7
	Fzd9	2.39916	0.790247	49.8021	1.70062e-12	1.64449e-11	Fzd9							Fzd9	2.51462	0.768798	26.62	2.47666e-07	2.27411e-06	Fzd9
	Gaa	1.20322	8.0603	171.065	4.33157e-39	1.88854e-37	Gaa							Gaa	1.27201	8.12596	102.918	3.49364e-24	2.41129e-22	Gaa
	Gab3	1.07505	2.49024	31.6788	1.81898e-08	1.14878e-07	Gab3							Gab3	1.38066	2.53127	26.6262	2.46879e-07	2.26972e-06	Gab3
	Gabbr1	-1.15095	7.24136	106.701	5.17644e-25	1.16948e-23	Gabbr1							Gabbr1	-1.11941	7.04044	60.1898	8.6136e-15	2.28656e-13	Gabbr1
	Gabre	2.95057	0.855821	75.4485	3.75061e-18	5.50989e-17	Gabre							Gabre	3.47341	0.89841	73.196	1.17393e-17	4.30309e-16	Gabre
	Gadl1	-1.46901	1.81417	39.6676	3.01085e-10	2.33219e-09	Gadl1							Gadl1	-1.69148	1.59848	14.6022	0.000132761	0.000677645	Gadl1
	Galc	1.42095	6.61998	255.025	2.08412e-57	1.73611e-55	Galc							Galc	1.43885	6.67892	116.806	3.16607e-27	2.78241e-25	Galc
	Galns	1.45201	5.24964	182.507	1.37447e-41	6.65413e-40	Galns							Galns	1.27696	5.31024	46.7852	7.921e-12	1.45174e-10	Galns
	Galnt16	-1.14664	2.96677	44.0389	3.21912e-11	2.74915e-10	Galnt16							Galnt16	-1.4746	2.66854	28.6084	8.85968e-08	8.79072e-07	Galnt16
	Galnt9	2.70669	0.727056	49.8536	1.65653e-12	1.60393e-11	Galnt9							Galnt9	2.94329	0.91577	43.1189	5.15109e-11	8.47475e-10	Galnt9
	Gas2l3	3.07094	4.57385	456.515	2.75649e-101	5.48027e-99	Gas2l3							Gas2l3	2.78637	4.74011	146.161	1.1971e-33	1.61312e-31	Gas2l3
	Gas7	3.94751	5.6851	925.484	2.83202e-203	1.75951e-200	Gas7							Gas7	3.46479	5.73231	171.381	3.6949e-39	6.53489e-37	Gas7
	Gbp6	2.47204	2.9725	92.1495	8.03686e-22	1.49052e-20	Gbp6							Gbp6	3.16766	3.51258	100.383	1.25627e-23	8.1912e-22	Gbp6
	Gbp7	-1.31776	5.5546	100.074	1.4678e-23	3.07824e-22	Gbp7							Gbp7	-1.11527	5.5467	31.4413	2.05564e-08	2.24944e-07	Gbp7
	Gca	1.1998	4.0627	97.6913	4.88972e-23	9.9198e-22	Gca							Gca	1.2288	3.96628	49.5174	1.9662e-12	3.87461e-11	Gca
	Gcnt2	1.71341	5.97789	268.644	2.24113e-60	2.02531e-58	Gcnt2							Gcnt2	1.69058	6.19621	105.415	9.90496e-25	7.37607e-23	Gcnt2
	Gdf9	-1.14753	2.5977	34.2252	4.90889e-09	3.29714e-08	Gdf9							Gdf9	-1.28587	2.38737	21.3837	3.75954e-06	2.76044e-05	Gdf9
	Gem	1.11895	4.39597	6.41918	0.0112894	0.025253	Gem							Gem	1.27699	4.03107	21.1788	4.18369e-06	3.04344e-05	Gem
	Gfap	8.40738	6.91497	355.218	3.09681e-79	4.35628e-77	Gfap							Gfap	7.79343	6.2636	603.861	2.42086e-133	6.85056e-130	Gfap
	Ggct	1.25754	1.77164	23.1187	1.52306e-06	7.42167e-06	Ggct							Ggct	1.20093	1.98578	15.437	8.53003e-05	0.000457684	Ggct
	Ggh	1.24095	5.70177	137.257	1.05957e-31	3.42717e-30	Ggh							Ggh	1.23105	5.80263	93.2091	4.70517e-22	2.58037e-20	Ggh
	Ggt5	-1.32681	5.79235	169.518	9.42999e-39	4.07567e-37	Ggt5							Ggt5	-1.39924	5.72573	96.2717	1.00151e-22	5.929e-21	Ggt5
	Ggta1	-1.62293	6.72463	303.167	6.72641e-68	7.11329e-66	Ggta1							Ggta1	-1.77579	6.61448	167.152	3.09837e-38	5.21891e-36	Ggta1
	Ghr	3.29827	2.22501	153.177	3.50412e-35	1.31944e-33	Ghr							Ghr	2.97542	2.05131	64.7833	8.36046e-16	2.51151e-14	Ghr
	Gimap1	-1.31516	3.92811	119.674	7.45478e-28	1.9674e-26	Gimap1							Gimap1	-1.62476	3.87892	96.0371	1.12749e-22	6.61945e-21	Gimap1
	Gimap5	-1.46319	1.03801	21.7632	3.08458e-06	1.44182e-05	Gimap5							Gimap5	-1.38777	1.04231	14.4681	0.000142551	0.000720858	Gimap5
	Gimap6	-1.45212	4.35676	118.29	1.49778e-27	3.86391e-26	Gimap6							Gimap6	-1.85881	4.33207	82.5434	1.03375e-19	4.55656e-18	Gimap6
	Gimap9	-1.66931	2.6038	67.142	2.52642e-16	3.29872e-15	Gimap9							Gimap9	-2.04439	2.80963	66.7623	3.06301e-16	9.69541e-15	Gimap9
	Gla	2.34379	4.4164	326.208	6.43664e-73	7.86694e-71	Gla							Gla	1.78942	4.47695	27.0859	1.94612e-07	1.81874e-06	Gla
	Glb1	1.76506	7.31295	385.455	8.08038e-86	1.24213e-83	Glb1							Glb1	1.91529	7.46265	190.068	3.07249e-43	7.36824e-41	Glb1
	Glipr1	1.7592	3.89564	157.096	4.877e-36	1.94441e-34	Glipr1							Glipr1	1.26201	3.99986	25.187	5.20309e-07	4.51094e-06	Glipr1
	Glmp	1.06596	7.6288	146.242	1.14926e-33	4.09967e-32	Glmp							Glmp	1.1057	7.62248	82.5275	1.04208e-19	4.579e-18	Glmp
	Gltp	1.11455	7.31527	157.427	4.12935e-36	1.65518e-34	Gltp							Gltp	1.04061	7.35825	51.9538	5.68217e-13	1.22184e-11	Gltp
	Gm10073	1.44848	2.07524	19.5988	9.55282e-06	4.13115e-05	Gm10073							Gm10073	1.27255	1.6874	14.1356	0.000170094	0.000843261	Gm10073
	Gm10132	1.13691	3.32883	39.4332	3.39475e-10	2.61597e-09	Gm10132							Gm10132	1.23297	3.36761	32.218	1.37805e-08	1.55239e-07	Gm10132
	Gm10154	1.41781	2.22031	17.6675	2.63081e-05	0.000105141	Gm10154							Gm10154	1.15766	2.14495	12.6535	0.000374854	0.00168589	Gm10154
	Gm10155	1.92494	0.284981	29.3983	5.89282e-08	3.47579e-07	Gm10155							Gm10155	1.37355	0.104594	10.2102	0.00139669	0.0053166	Gm10155
	Gm10177	1.07338	1.91127	14.5866	0.000133866	0.000471887	Gm10177							Gm10177	1.20125	1.88773	12.2717	0.00045989	0.00200771	Gm10177
	Gm10275	1.43965	5.92476	111.475	4.65612e-26	1.11799e-24	Gm10275							Gm10275	1.24159	5.89006	61.4699	4.49566e-15	1.23035e-13	Gm10275
	Gm10288	1.2617	1.64971	20.437	6.16252e-06	2.74871e-05	Gm10288							Gm10288	1.30729	1.54334	15.4137	8.63602e-05	0.000462495	Gm10288
	Gm10335	1.26412	4.87623	56.1886	6.58432e-14	7.19786e-13	Gm10335							Gm10335	1.2871	4.90281	61.5934	4.22229e-15	1.16455e-13	Gm10335
	Gm10369	1.48087	0.469917	15.3499	8.93266e-05	0.000324549	Gm10369							Gm10369	1.35502	0.192526	11.5436	0.00067983	0.00283744	Gm10369
	Gm10384	-1.0087	4.14931	49.2874	2.21078e-12	2.11178e-11	Gm10384							Gm10384	-1.01854	3.72318	22.7062	1.88756e-06	1.46501e-05	Gm10384
	Gm10443	1.35434	3.06105	19.0958	1.24316e-05	5.26166e-05	Gm10443							Gm10443	1.41941	2.91943	27.2289	1.80737e-07	1.70143e-06	Gm10443
	Gm10561	2.69838	-0.158647	30.5493	3.25483e-08	1.98417e-07	Gm10561							Gm10561	1.92919	-0.131653	17.0199	3.69899e-05	0.00021935	Gm10561
	Gm10615	-1.34152	1.09463	16.3674	5.21752e-05	0.000198668	Gm10615							Gm10615	-1.04532	0.483049	7.12841	0.0075872	0.0226815	Gm10615
	Gm10677	1.41004	0.761678	14.3079	0.000155208	0.00053909	Gm10677							Gm10677	1.51333	0.931612	20.4936	5.98322e-06	4.20758e-05	Gm10677
	Gm10790	-1.40593	6.97618	218.903	1.56943e-49	1.00008e-47	Gm10790							Gm10790	-1.43468	6.77354	73.0815	1.24405e-17	4.54832e-16	Gm10790
	Gm11249	1.45843	2.52042	17.0362	3.66732e-05	0.000143188	Gm11249							Gm11249	1.16229	2.64446	10.4162	0.00124916	0.00481589	Gm11249
	Gm11263	1.32588	-0.085612	9.77584	0.0017682	0.00485286	Gm11263							Gm11263	1.31001	-0.169857	5.69322	0.0170306	0.0446068	Gm11263
	Gm11523	-1.86647	4.40423	175.527	4.59372e-40	2.08198e-38	Gm11523							Gm11523	-2.08039	4.08598	93.6396	3.78541e-22	2.10039e-20	Gm11523
	Gm11545	1.61162	4.62063	105.76	8.32323e-25	1.86069e-23	Gm11545							Gm11545	1.6977	4.60172	116.248	4.195e-27	3.6639e-25	Gm11545
	Gm11703	1.48372	3.27575	75.2064	4.23986e-18	6.19809e-17	Gm11703							Gm11703	1.57674	3.2892	53.3856	2.74102e-13	6.06928e-12	Gm11703
	Gm11808	1.50172	6.24669	137.431	9.70444e-32	3.15257e-30	Gm11808							Gm11808	1.38689	6.31602	58.7563	1.78461e-14	4.55784e-13	Gm11808
	Gm11827	-1.99632	0.361107	21.4951	3.54737e-06	1.64015e-05	Gm11827							Gm11827	-2.13142	-0.00732316	23.157	1.49302e-06	1.18612e-05	Gm11827
	Gm12070	1.75418	1.49363	43.4991	4.24149e-11	3.58328e-10	Gm12070							Gm12070	1.53973	1.56205	21.5069	3.52553e-06	2.59941e-05	Gm12070
	Gm12163	2.04152	-0.134239	22.9135	1.69456e-06	8.20645e-06	Gm12163							Gm12163	2.06616	-0.452729	19.269	1.13533e-05	7.49945e-05	Gm12163
	Gm12164	1.73872	0.765536	25.3511	4.77884e-07	2.49065e-06	Gm12164							Gm12164	1.45503	0.467097	16.1817	5.75459e-05	0.00032259	Gm12164
	Gm12474	1.6304	2.09498	34.4179	4.44617e-09	2.99579e-08	Gm12474							Gm12474	2.01036	2.02814	31.8275	1.68494e-08	1.86982e-07	Gm12474
	Gm12867	1.10615	0.807653	11.7672	0.000602853	0.00185228	Gm12867							Gm12867	1.27786	0.655077	12.4735	0.000412765	0.00183021	Gm12867
	Gm12958	-2.21633	0.0431441	26.9722	2.06398e-07	1.13859e-06	Gm12958							Gm12958	-1.97299	0.082487	19.2062	1.17331e-05	7.73806e-05	Gm12958
	Gm13067	-1.29277	1.54988	22.2454	2.39936e-06	1.13794e-05	Gm13067							Gm13067	-1.80003	1.43745	23.909	1.00996e-06	8.31778e-06	Gm13067
	Gm13293	-1.91297	3.03742	58.322	2.22541e-14	2.55845e-13	Gm13293							Gm13293	-1.58572	2.847	28.7482	8.24279e-08	8.21319e-07	Gm13293
	Gm13391	3.37228	4.63337	530.48	2.22109e-117	5.51978e-115	Gm13391							Gm13391	3.27455	4.68628	325.888	7.5581e-73	5.09236e-70	Gm13391
	Gm13408	1.25668	0.403825	13.0916	0.000296627	0.000971448	Gm13408							Gm13408	1.11457	0.338558	9.18808	0.00243597	0.00864906	Gm13408
	Gm13436	1.29947	0.638431	12.7638	0.00035339	0.00113933	Gm13436							Gm13436	1.18902	0.631996	11.4928	0.000698668	0.00290749	Gm13436
	Gm13456	1.69876	3.97948	66.7956	3.01164e-16	3.90492e-15	Gm13456							Gm13456	1.70056	4.04782	87.6822	7.68626e-21	3.73721e-19	Gm13456
	Gm13479	-1.4286	4.54229	187.404	1.17224e-42	5.86552e-41	Gm13479							Gm13479	-1.51301	4.42356	61.2893	4.9274e-15	1.33559e-13	Gm13479
	Gm13778	-1.76722	2.90216	89.2705	3.44349e-21	6.11989e-20	Gm13778							Gm13778	-2.03541	2.53588	50.932	9.56203e-13	1.97508e-11	Gm13778
	Gm13841	1.2587	4.08252	88.9291	4.0921e-21	7.21244e-20	Gm13841							Gm13841	1.20741	4.17201	48.8456	2.76929e-12	5.38223e-11	Gm13841
	Gm13889	2.08368	5.26281	105.452	9.7244e-25	2.16742e-23	Gm13889							Gm13889	2.38656	5.58752	77.9351	1.06483e-18	4.28021e-17	Gm13889
	Gm14154	-1.09726	0.739086	13.6467	0.000220625	0.000742605	Gm14154							Gm14154	-1.54635	0.417241	14.5232	0.000138447	0.000702864	Gm14154
	Gm14586	1.18538	0.848226	15.1294	0.000100389	0.00036096	Gm14586							Gm14586	1.02379	0.578263	8.33007	0.00389942	0.0129423	Gm14586
	Gm14681	1.50672	2.10397	30.277	3.74539e-08	2.26378e-07	Gm14681							Gm14681	1.39314	2.3377	25.8135	3.76044e-07	3.33374e-06	Gm14681
	Gm14834	-1.23711	-0.0775383	8.89775	0.00285522	0.00746523	Gm14834							Gm14834	-1.528	-0.282504	10.6018	0.00112976	0.0044133	Gm14834
	Gm15232	-1.08485	1.85761	18.5986	1.61339e-05	6.72553e-05	Gm15232							Gm15232	-1.81633	1.51087	25.9063	3.58402e-07	3.19134e-06	Gm15232
	Gm15246	-1.34853	1.85587	30.8646	2.76678e-08	1.70126e-07	Gm15246							Gm15246	-1.35056	1.60299	14.078	0.000175381	0.00086462	Gm15246
	Gm15283	2.74251	0.429904	42.1773	8.33605e-11	6.87114e-10	Gm15283							Gm15283	4.01566	0.334373	64.3494	1.04199e-15	3.07788e-14	Gm15283
	Gm15337	2.10911	1.14142	42.3578	7.60117e-11	6.28624e-10	Gm15337							Gm15337	1.24578	0.979158	13.7261	0.000211495	0.00101784	Gm15337
	Gm15427	1.20743	6.32432	84.9141	3.11605e-20	5.23827e-19	Gm15427							Gm15427	1.21716	6.45308	43.7057	3.81662e-11	6.42874e-10	Gm15427
	Gm15500	1.41265	5.60025	92.2063	7.80954e-22	1.45016e-20	Gm15500							Gm15500	1.23405	5.46476	45.1812	1.79623e-11	3.11839e-10	Gm15500
	Gm15523	-1.56809	3.55305	103.258	2.94152e-24	6.37515e-23	Gm15523							Gm15523	-1.40654	3.48055	49.7035	1.78827e-12	3.54871e-11	Gm15523
	Gm15682	1.39795	2.76353	45.9528	1.21134e-11	1.07195e-10	Gm15682							Gm15682	1.62953	2.89008	38.6094	5.17682e-10	7.36149e-09	Gm15682
	Gm15707	-1.28447	0.683064	14.235	0.000161337	0.000557648	Gm15707							Gm15707	-1.32341	0.370826	10.2678	0.00135376	0.00517125	Gm15707
	Gm15710	1.37908	2.69901	40.5716	1.89543e-10	1.50015e-09	Gm15710							Gm15710	1.24622	2.63918	22.6071	1.98748e-06	1.53834e-05	Gm15710
	Gm15772	1.53523	3.93725	97.0455	6.77527e-23	1.35788e-21	Gm15772							Gm15772	1.21831	3.99102	27.2797	1.76048e-07	1.66061e-06	Gm15772
	Gm15880	1.4571	3.06002	55.0378	1.18234e-13	1.26108e-12	Gm15880							Gm15880	1.51227	2.98014	33.6652	6.54624e-09	7.81627e-08	Gm15880
	Gm15912	-1.38773	1.46666	31.168	2.36638e-08	1.47082e-07	Gm15912							Gm15912	-1.89786	1.29737	26.4499	2.70463e-07	2.47049e-06	Gm15912
	Gm16071	1.17268	1.23747	14.2378	0.000161104	0.000557101	Gm16071							Gm16071	1.65684	1.03153	17.8739	2.36041e-05	0.000145206	Gm16071
	Gm16183	3.30256	2.59865	199.732	2.38982e-45	1.32471e-43	Gm16183							Gm16183	3.13218	2.37816	96.3215	9.76614e-23	5.80593e-21	Gm16183
	Gm16315	1.16062	1.00368	15.8708	6.78171e-05	0.000252112	Gm16315							Gm16315	1.16757	0.662925	11.4214	0.000726021	0.00301334	Gm16315
	Gm1673	6.14272	4.58187	534.953	2.36245e-118	6.07354e-116	Gm1673							Gm1673	6.01707	4.49965	277.134	3.1633e-62	1.39867e-59	Gm1673
	Gm17828	1.55081	1.48096	20.0709	7.46253e-06	3.28338e-05	Gm17828							Gm17828	1.06045	1.37653	5.84071	0.0156595	0.0415065	Gm17828
	Gm19688	-1.77124	-0.235227	15.0038	0.000107295	0.000384494	Gm19688							Gm19688	-1.78464	-0.318229	13.6177	0.000224069	0.00107215	Gm19688
	Gm19689	-1.64705	0.673467	25.7048	3.97835e-07	2.10061e-06	Gm19689							Gm19689	-1.44755	0.324397	10.251	0.00136608	0.00520849	Gm19689
	Gm2000	1.28715	3.98415	70.1542	5.48442e-17	7.50948e-16	Gm2000							Gm2000	1.06473	3.87356	28.8117	7.97686e-08	7.96504e-07	Gm2000
	Gm20045	-1.6002	2.94687	44.7546	2.23343e-11	1.93461e-10	Gm20045							Gm20045	-1.48392	2.34303	24.0174	9.54705e-07	7.9273e-06	Gm20045
	Gm20257	-1.09796	2.67892	29.4866	5.63048e-08	3.32763e-07	Gm20257							Gm20257	-1.14666	2.31163	15.4307	8.55876e-05	0.000459052	Gm20257
	Gm20559	1.51508	3.96543	58.2982	2.25251e-14	2.58562e-13	Gm20559							Gm20559	1.19648	3.60743	23.3927	1.32081e-06	1.06183e-05	Gm20559
	Gm2065	3.42549	3.26895	249.61	3.15836e-56	2.5876e-54	Gm2065							Gm2065	3.20417	3.19482	141.448	1.28391e-32	1.59351e-30	Gm2065
	Gm21057	-1.09158	2.15016	24.6466	6.8867e-07	3.5155e-06	Gm21057							Gm21057	-1.10782	1.68187	10.886	0.000968946	0.0038684	Gm21057
	Gm21358	-1.68506	1.1385	33.0447	9.00656e-09	5.89021e-08	Gm21358							Gm21358	-1.97994	0.761796	28.4314	9.70784e-08	9.53862e-07	Gm21358
	Gm2225	1.07055	0.220398	7.19372	0.00731592	0.0172041	Gm2225							Gm2225	1.18545	0.0544744	9.12903	0.00251585	0.00889698	Gm2225
	Gm26634	-1.08301	0.39657	8.38669	0.00377979	0.0095786	Gm26634							Gm26634	-1.03268	0.271721	5.88068	0.0153079	0.040751	Gm26634
	Gm26728	1.21878	2.47021	32.0284	1.51935e-08	9.67337e-08	Gm26728							Gm26728	1.47579	2.54246	23.5746	1.20161e-06	9.74304e-06	Gm26728
	Gm26797	1.74102	1.50498	20.0127	7.69299e-06	3.37577e-05	Gm26797							Gm26797	1.77932	1.41262	25.6368	4.121e-07	3.6329e-06	Gm26797
	Gm26947	1.05328	4.03174	67.2862	2.34815e-16	3.07403e-15	Gm26947							Gm26947	1.24919	3.89514	39.7613	2.86971e-10	4.24279e-09	Gm26947
	Gm27008	-1.62007	3.02796	68.3212	1.3892e-16	1.8528e-15	Gm27008							Gm27008	-1.43736	2.80815	25.8666	3.65852e-07	3.24949e-06	Gm27008
	Gm28809	1.51713	2.22822	48.3732	3.52354e-12	3.28551e-11	Gm28809							Gm28809	1.53578	2.22334	25.0829	5.49168e-07	4.73503e-06	Gm28809
	Gm28874	-1.40821	0.570257	15.5527	8.02365e-05	0.000293911	Gm28874							Gm28874	-2.47239	0.180972	22.9674	1.6477e-06	1.29735e-05	Gm28874
	Gm29901	1.35411	0.868689	21.2627	4.00451e-06	1.83784e-05	Gm29901							Gm29901	1.06473	0.776941	6.12479	0.01333	0.0364103	Gm29901
	Gm29927	-2.60486	1.02317	58.4223	2.11475e-14	2.43311e-13	Gm29927							Gm29927	-2.09882	0.978256	20.9923	4.61133e-06	3.33227e-05	Gm29927
	Gm2a	1.008	8.43099	114.81	8.66291e-27	2.1493e-25	Gm2a							Gm2a	1.02498	8.54095	52.4444	4.42613e-13	9.57573e-12	Gm2a
	Gm30013	-1.22884	0.438343	12.9939	0.00031251	0.00101877	Gm30013							Gm30013	-2.12713	0.00151669	20.7215	5.31168e-06	3.79571e-05	Gm30013
	Gm30122	-1.25209	0.731652	12.4114	0.000426731	0.00135296	Gm30122							Gm30122	-1.53117	0.656105	14.4622	0.000142998	0.000722859	Gm30122
	Gm30327	-1.53979	1.03212	19.7748	8.71255e-06	3.79751e-05	Gm30327							Gm30327	-1.48622	0.564116	12.9482	0.000320223	0.00147105	Gm30327
	Gm30411	-1.40142	-0.0636285	7.98987	0.00470397	0.0115929	Gm30411							Gm30411	-1.2425	-0.156185	7.84724	0.00508983	0.0161326	Gm30411
	Gm3052	-1.44947	3.57994	82.425	1.09758e-19	1.78863e-18	Gm3052							Gm3052	-1.07514	3.40255	13.2989	0.000265566	0.00124709	Gm3052
	Gm30604	-1.67318	0.118624	16.9688	3.80001e-05	0.000148175	Gm30604							Gm30604	-2.92202	-0.113726	33.5859	6.81863e-09	8.08957e-08	Gm30604
	Gm30712	2.19049	0.500372	33.5596	6.91121e-09	4.57494e-08	Gm30712							Gm30712	1.60825	0.561984	15.0903	0.000102486	0.000540266	Gm30712
	Gm30723	-2.30461	4.66594	198.087	5.46054e-45	2.99346e-43	Gm30723							Gm30723	-2.24624	4.37687	65.4002	6.11342e-16	1.8562e-14	Gm30723
	Gm30757	2.64701	0.438153	39.8317	2.76818e-10	2.15655e-09	Gm30757							Gm30757	2.43111	0.170112	30.0799	4.1461e-08	4.34221e-07	Gm30757
	Gm30789	-1.83043	5.76242	280.961	4.63545e-63	4.43072e-61	Gm30789							Gm30789	-1.81897	5.70119	76.3274	2.40329e-18	9.3418e-17	Gm30789
	Gm30845	2.72344	2.00208	127.192	1.68682e-29	4.92215e-28	Gm30845							Gm30845	2.56019	2.1675	59.6483	1.13419e-14	2.9663e-13	Gm30845
	Gm30873	4.60454	-0.416831	57.0058	4.34537e-14	4.84258e-13	Gm30873							Gm30873	3.79388	-0.482814	48.2474	3.75703e-12	7.12577e-11	Gm30873
	Gm31223	-1.99387	0.837843	41.3245	1.28945e-10	1.03986e-09	Gm31223							Gm31223	-3.00757	0.913044	54.6323	1.45326e-13	3.32721e-12	Gm31223
	Gm31386	-1.05218	0.204481	6.65481	0.00988887	0.0224707	Gm31386							Gm31386	-1.61065	-0.378801	13.871	0.000195792	0.00095329	Gm31386
	Gm31388	-1.1006	0.672621	10.9361	0.000943065	0.00277085	Gm31388							Gm31388	-1.23373	0.492096	7.6056	0.00581875	0.018073	Gm31388
	Gm31482	-1.6654	1.21335	37.6586	8.42745e-10	6.16593e-09	Gm31482							Gm31482	-2.20036	1.06802	37.5244	9.02759e-10	1.23055e-08	Gm31482
	Gm31726	-1.20665	1.44195	16.8481	4.0494e-05	0.000157037	Gm31726							Gm31726	-1.46666	1.33901	17.1816	3.39704e-05	0.000202548	Gm31726
	Gm32006	-1.4831	3.91512	58.7804	1.76291e-14	2.04248e-13	Gm32006							Gm32006	-1.6975	3.48098	40.2353	2.25143e-10	3.38528e-09	Gm32006
	Gm32098	-1.77841	4.59496	203.732	3.20301e-46	1.85837e-44	Gm32098							Gm32098	-1.58397	4.37473	80.2539	3.2927e-19	1.38244e-17	Gm32098
	Gm32131	1.36021	0.421642	12.9443	0.000320897	0.00104291	Gm32131							Gm32131	1.09454	0.352046	6.81349	0.00904716	0.0262258	Gm32131
	Gm32249	-2.23557	4.83594	302.179	1.10444e-67	1.15974e-65	Gm32249							Gm32249	-2.65001	4.58491	170.675	5.2697e-39	9.20506e-37	Gm32249
	Gm32317	-1.3404	2.54647	42.0258	9.00792e-11	7.38818e-10	Gm32317							Gm32317	-1.23604	2.26949	19.4133	1.05271e-05	7.01922e-05	Gm32317
	Gm32438	1.56602	0.911704	28.774	8.13365e-08	4.70811e-07	Gm32438							Gm32438	1.40384	0.834194	14.5958	0.000133211	0.000679206	Gm32438
	Gm32605	-1.71217	4.0822	77.6978	1.20078e-18	1.83263e-17	Gm32605							Gm32605	-1.82136	3.87733	93.89	3.33559e-22	1.86543e-20	Gm32605
	Gm3264	-1.02326	4.46201	74.5707	5.85057e-18	8.45329e-17	Gm3264							Gm3264	-1.09145	4.2394	31.4997	1.99476e-08	2.18859e-07	Gm3264
	Gm32643	1.24854	2.79602	32.1979	1.39238e-08	8.89539e-08	Gm32643							Gm32643	1.00217	2.45682	13.2282	0.000275764	0.00128814	Gm32643
	Gm32854	2.38916	1.28141	45.6	1.45042e-11	1.27715e-10	Gm32854							Gm32854	2.61267	1.06817	44.0824	3.14833e-11	5.35406e-10	Gm32854
	Gm32914	2.91357	0.241803	34.546	4.16302e-09	2.82287e-08	Gm32914							Gm32914	4.03083	0.0547456	33.1913	8.35244e-09	9.74267e-08	Gm32914
	Gm32992	-1.54186	0.928905	23.8472	1.04294e-06	5.2063e-06	Gm32992							Gm32992	-1.57067	0.810323	14.2468	0.000160337	0.000801061	Gm32992
	Gm33048	-1.83679	0.101859	17.9444	2.27453e-05	9.23121e-05	Gm33048							Gm33048	-2.3887	-0.30481	25.2774	4.96481e-07	4.32024e-06	Gm33048
	Gm33100	-1.04339	0.78953	7.63869	0.00571292	0.0137863	Gm33100							Gm33100	-1.49758	0.928074	13.9471	0.000188026	0.000919594	Gm33100
	Gm33434	-1.28428	0.444109	13.8266	0.00020048	0.000680172	Gm33434							Gm33434	-2.69373	0.230597	32.8767	9.81942e-09	1.12864e-07	Gm33434
	Gm33641	-1.0263	1.76041	17.9693	2.245e-05	9.11633e-05	Gm33641							Gm33641	-1.33045	1.56597	13.4362	0.000246817	0.0011711	Gm33641
	Gm33699	-1.47308	3.12966	96.8283	7.5609e-23	1.50521e-21	Gm33699							Gm33699	-1.4178	2.91922	35.7738	2.21603e-09	2.84525e-08	Gm33699
	Gm34189	1.36606	3.31592	71.8448	2.32801e-17	3.24723e-16	Gm34189							Gm34189	1.76268	3.05699	51.0178	9.15317e-13	1.89617e-11	Gm34189
	Gm34194	2.52172	0.267606	39.8324	2.76715e-10	2.15655e-09	Gm34194							Gm34194	2.44516	-0.368441	24.3561	8.00745e-07	6.71591e-06	Gm34194
	Gm34589	-1.1673	4.47009	40.2673	2.21489e-10	1.74373e-09	Gm34589							Gm34589	-1.40639	4.1519	58.7312	1.80751e-14	4.59841e-13	Gm34589
	Gm34643	2.67177	0.540075	47.2119	6.37133e-12	5.79639e-11	Gm34643							Gm34643	1.70714	0.369033	12.8486	0.000337736	0.001541	Gm34643
	Gm34836	-1.12846	5.49931	124.954	5.20807e-29	1.47358e-27	Gm34836							Gm34836	-1.28472	5.30669	69.2803	8.54175e-17	2.90522e-15	Gm34836
	Gm34849	-1.01596	0.787749	9.78752	0.001757	0.00482747	Gm34849							Gm34849	-1.98409	0.601316	14.6971	0.000126238	0.000648192	Gm34849
	Gm34861	-1.09984	2.73768	29.1149	6.82107e-08	3.9839e-07	Gm34861							Gm34861	-1.3706	2.29796	16.7308	4.30749e-05	0.000250603	Gm34861
	Gm35242	-2.04561	0.658845	37.576	8.79181e-10	6.40424e-09	Gm35242							Gm35242	-2.16342	0.152423	25.8928	3.60905e-07	3.20958e-06	Gm35242
	Gm35243	-1.31959	2.46838	37.3454	9.89544e-10	7.16963e-09	Gm35243							Gm35243	-1.61223	2.15305	26.7872	2.27136e-07	2.09774e-06	Gm35243
	Gm35247	-1.94477	2.27388	47.3603	5.90665e-12	5.38021e-11	Gm35247							Gm35247	-2.48505	2.04057	48.4646	3.36308e-12	6.41298e-11	Gm35247
	Gm35828	-1.53925	4.32971	113.58	1.61075e-26	3.95031e-25	Gm35828							Gm35828	-1.35561	4.05707	56.6517	5.20247e-14	1.254e-12	Gm35828
	Gm35831	-1.08791	3.56917	35.8507	2.13032e-09	1.49131e-08	Gm35831							Gm35831	-1.18236	3.43953	23.1495	1.4988e-06	1.19004e-05	Gm35831
	Gm35853	-1.18029	1.14267	20.2165	6.91529e-06	3.05522e-05	Gm35853							Gm35853	-1.52542	1.114	18.0497	2.15212e-05	0.000134083	Gm35853
	Gm35866	-1.50122	1.75962	41.2887	1.31324e-10	1.0579e-09	Gm35866							Gm35866	-1.53481	1.68513	23.4365	1.29109e-06	1.0403e-05	Gm35866
	Gm35887	-2.03242	0.279311	25.4684	4.49689e-07	2.35192e-06	Gm35887							Gm35887	-1.59932	0.468774	16.5484	4.74252e-05	0.000271777	Gm35887
	Gm35999	-1.72017	2.11148	32.6742	1.08973e-08	7.04639e-08	Gm35999							Gm35999	-1.88767	2.00024	29.1249	6.78599e-08	6.84843e-07	Gm35999
	Gm36003	-1.63282	2.2771	38.3466	5.92315e-10	4.42707e-09	Gm36003							Gm36003	-1.84815	1.98111	30.5464	3.2598e-08	3.46789e-07	Gm36003
	Gm36043	1.78879	2.0824	45.3123	1.6799e-11	1.46915e-10	Gm36043							Gm36043	1.64434	2.24248	26.3968	2.78001e-07	2.53443e-06	Gm36043
	Gm36266	-1.50266	2.71734	73.3557	1.0827e-17	1.54265e-16	Gm36266							Gm36266	-1.33637	2.38003	16.3026	5.39908e-05	0.000304713	Gm36266
	Gm36304	2.31864	0.144229	30.6659	3.0651e-08	1.87387e-07	Gm36304							Gm36304	2.63553	0.178267	36.8902	1.24973e-09	1.66189e-08	Gm36304
	Gm36365	-1.71117	6.88956	266.663	6.05608e-60	5.37513e-58	Gm36365							Gm36365	-1.82528	6.66767	173.106	1.55201e-39	2.85186e-37	Gm36365
	Gm36417	-1.0356	0.185796	7.64262	0.00570051	0.0137608	Gm36417							Gm36417	-1.99122	-0.0583474	17.4894	2.88907e-05	0.000174989	Gm36417
	Gm36449	-1.7797	0.286086	21.3173	3.89209e-06	1.78955e-05	Gm36449							Gm36449	-1.53541	-0.107168	12.8673	0.00033437	0.00152679	Gm36449
	Gm36462	-1.46761	0.977838	21.6582	3.25806e-06	1.5172e-05	Gm36462							Gm36462	-1.75105	0.865519	18.3369	1.85086e-05	0.000117119	Gm36462
	Gm36774	-2.38946	0.925057	42.8573	5.88805e-11	4.91583e-10	Gm36774							Gm36774	-2.94494	0.711543	41.9832	9.20593e-11	1.45244e-09	Gm36774
	Gm36778	-1.59742	1.73588	35.809	2.1764e-09	1.5193e-08	Gm36778							Gm36778	-1.20056	1.36114	12.5899	0.00038784	0.00173721	Gm36778
	Gm36851	-1.05162	2.24885	17.7743	2.48725e-05	9.98854e-05	Gm36851							Gm36851	-1.14241	2.10841	10.0279	0.00154189	0.00578988	Gm36851
	Gm36884	-2.44235	2.55931	120.389	5.19971e-28	1.38452e-26	Gm36884							Gm36884	-2.36179	2.46572	71.609	2.62351e-17	9.23383e-16	Gm36884
	Gm38521	-1.08375	0.504218	7.7238	0.00544976	0.0132369	Gm38521							Gm38521	-1.47079	0.00584944	12.203	0.00047713	0.00207274	Gm38521
	Gm38729	1.0529	1.54934	14.0413	0.000178843	0.000613463	Gm38729							Gm38729	1.06029	1.14199	9.28437	0.00231118	0.00826281	Gm38729
	Gm38843	-1.11685	3.2203	34.5284	4.20067e-09	2.84451e-08	Gm38843							Gm38843	-1.40649	2.93509	34.9032	3.46508e-09	4.30821e-08	Gm38843
	Gm38907	-1.90269	0.255939	24.8834	6.09029e-07	3.13254e-06	Gm38907							Gm38907	-2.22819	-0.0929558	12.5377	0.000398826	0.00178012	Gm38907
	Gm38987	-1.91933	0.0914912	15.8891	6.71634e-05	0.000249934	Gm38987							Gm38987	-2.62959	-0.213834	22.3966	2.2177e-06	1.69796e-05	Gm38987
	Gm39285	-2.16477	2.89869	121.412	3.10461e-28	8.3864e-27	Gm39285							Gm39285	-1.9667	2.66183	42.887	5.79943e-11	9.43174e-10	Gm39285
	Gm39308	-1.01553	0.591946	9.13796	0.00250361	0.00664258	Gm39308							Gm39308	-1.43962	0.418943	15.2194	9.57144e-05	0.000508166	Gm39308
	Gm39348	-1.87932	2.04177	69.096	9.37837e-17	1.25983e-15	Gm39348							Gm39348	-2.20596	1.64117	30.8473	2.79157e-08	3.00365e-07	Gm39348
	Gm39439	-1.30106	0.674781	13.8634	0.000196591	0.000667739	Gm39439							Gm39439	-1.92877	0.620389	20.6516	5.50917e-06	3.91312e-05	Gm39439
	Gm39518	1.89722	2.12077	55.093	1.14961e-13	1.22792e-12	Gm39518							Gm39518	2.02109	2.16596	36.0783	1.8955e-09	2.46276e-08	Gm39518
	Gm39565	-1.03964	2.93872	38.3287	5.97764e-10	4.46556e-09	Gm39565							Gm39565	-1.3728	2.81279	19.6321	9.38773e-06	6.32509e-05	Gm39565
	Gm39624	-1.74223	1.67716	33.0547	8.96036e-09	5.86257e-08	Gm39624							Gm39624	-1.81905	1.48465	22.3012	2.33058e-06	1.77957e-05	Gm39624
	Gm39673	-1.28621	6.10184	100.544	1.15804e-23	2.43204e-22	Gm39673							Gm39673	-1.53459	5.76508	80.5376	2.85228e-19	1.20469e-17	Gm39673
	Gm39884	-1.44165	2.14471	31.3551	2.14897e-08	1.34344e-07	Gm39884							Gm39884	-1.26432	1.86396	18.1258	2.06778e-05	0.000129456	Gm39884
	Gm40096	-1.2833	2.63651	37.5855	8.74907e-10	6.38246e-09	Gm40096							Gm40096	-1.83976	2.29726	40.0157	2.51928e-10	3.76402e-09	Gm40096
	Gm40106	2.10618	-0.0966723	24.5286	7.32135e-07	3.72971e-06	Gm40106							Gm40106	1.83787	-0.0962568	19.9776	7.83552e-06	5.37135e-05	Gm40106
	Gm40579	-2.81211	0.240777	31.5834	1.9106e-08	1.20257e-07	Gm40579							Gm40579	-2.93325	-0.0793838	38.5427	5.35697e-10	7.61002e-09	Gm40579
	Gm40841	-1.31617	7.1163	113.861	1.39766e-26	3.43903e-25	Gm40841							Gm40841	-1.36081	6.90938	61.5105	4.40385e-15	1.2099e-13	Gm40841
	Gm40860	-1.94657	3.11343	104.223	1.80799e-24	3.98802e-23	Gm40860							Gm40860	-2.14627	2.81151	64.7986	8.29587e-16	2.49741e-14	Gm40860
	Gm40863	-1.89294	1.85195	39.4256	3.40806e-10	2.62488e-09	Gm40863							Gm40863	-2.49056	1.4476	43.6794	3.86821e-11	6.50016e-10	Gm40863
	Gm41071	-1.81385	3.99201	120.308	5.41564e-28	1.43944e-26	Gm41071							Gm41071	-2.45273	3.69269	80.6351	2.71493e-19	1.1501e-17	Gm41071
	Gm41308	-1.4801	1.77132	37.0054	1.17803e-09	8.46943e-09	Gm41308							Gm41308	-1.57562	1.43116	21.6615	3.25247e-06	2.40309e-05	Gm41308
	Gm41425	-1.54389	0.192805	16.1022	6.00142e-05	0.000225352	Gm41425							Gm41425	-1.52494	-0.0952437	11.6135	0.000654739	0.00274161	Gm41425
	Gm41556	-1.88013	0.859197	32.9336	9.53625e-09	6.21754e-08	Gm41556							Gm41556	-1.93706	0.495228	18.0776	2.12077e-05	0.00013248	Gm41556
	Gm41569	-1.36375	1.29962	21.1219	4.30977e-06	1.97065e-05	Gm41569							Gm41569	-1.64883	0.787045	15.7169	7.35645e-05	0.000400372	Gm41569
	Gm41598	-1.47321	3.70831	86.2082	1.61957e-20	2.7505e-19	Gm41598							Gm41598	-1.8036	3.47284	59.0262	1.55584e-14	3.98796e-13	Gm41598
	Gm41611	-1.37527	2.87383	45.4493	1.56641e-11	1.37554e-10	Gm41611							Gm41611	-1.43039	2.77764	20.7963	5.10824e-06	3.65587e-05	Gm41611
	Gm41750	-1.30654	2.07893	39.2844	3.66354e-10	2.80859e-09	Gm41750							Gm41750	-1.21615	1.95745	10.5988	0.00113164	0.00441943	Gm41750
	Gm41823	3.97322	-0.325423	40.7557	1.72502e-10	1.37329e-09	Gm41823							Gm41823	3.71117	-0.357399	45.329	1.66562e-11	2.91591e-10	Gm41823
	Gm41914	2.61717	0.830274	58.0728	2.52592e-14	2.89056e-13	Gm41914							Gm41914	2.44028	0.757807	23.0223	1.6013e-06	1.26362e-05	Gm41914
	Gm4204	1.20235	4.0508	72.3478	1.80428e-17	2.52853e-16	Gm4204							Gm4204	1.33702	4.15007	51.4284	7.4255e-13	1.56344e-11	Gm4204
	Gm42043	-1.51522	2.07664	44.8086	2.17263e-11	1.88459e-10	Gm42043							Gm42043	-2.27129	1.94629	44.7762	2.20891e-11	3.8161e-10	Gm42043
	Gm42333	1.33582	1.01375	15.8651	6.80197e-05	0.000252802	Gm42333							Gm42333	1.15724	0.730314	8.10487	0.00441465	0.0143329	Gm42333
	Gm42364	-1.85805	0.206089	18.8714	1.39831e-05	5.87501e-05	Gm42364							Gm42364	-1.84272	-0.201556	16.9527	3.83224e-05	0.000226967	Gm42364
	Gm4332	1.27261	3.41423	35.0407	3.22892e-09	2.21465e-08	Gm4332							Gm4332	1.33967	3.43612	37.3873	9.6849e-10	1.31686e-08	Gm4332
	Gm4366	1.09043	3.25957	40.8765	1.62159e-10	1.29609e-09	Gm4366							Gm4366	1.06906	3.1094	21.396	3.73559e-06	2.74571e-05	Gm4366
	Gm43837	-1.92805	-0.0757754	17.784	2.47459e-05	9.94035e-05	Gm43837							Gm43837	-1.1477	0.145483	6.89155	0.00866041	0.0252652	Gm43837
	Gm44026	2.68214	0.238747	20.8432	4.98453e-06	2.25965e-05	Gm44026							Gm44026	3.77934	-0.268619	38.9347	4.38225e-10	6.28211e-09	Gm44026
	Gm44040	1.14828	0.301106	8.82407	0.00297283	0.0077361	Gm44040							Gm44040	1.43216	0.17466	15.8079	7.01083e-05	0.000383441	Gm44040
	Gm45855	1.22633	2.27798	25.6867	4.01588e-07	2.11967e-06	Gm45855							Gm45855	1.48951	2.2808	23.8125	1.06188e-06	8.7099e-06	Gm45855
	Gm45969	3.94675	1.60497	155.295	1.20693e-35	4.67443e-34	Gm45969							Gm45969	3.03892	1.66104	64.208	1.11952e-15	3.29315e-14	Gm45969
	Gm46116	-1.54326	4.88517	149.299	2.46712e-34	8.99444e-33	Gm46116							Gm46116	-1.45225	4.71377	80.1127	3.53651e-19	1.48042e-17	Gm46116
	Gm46591	1.8052	1.48318	47.5792	5.28257e-12	4.83835e-11	Gm46591							Gm46591	1.36111	1.38859	16.4874	4.89743e-05	0.000279636	Gm46591
	Gm46626	-1.34742	1.47427	25.7285	3.92985e-07	2.07868e-06	Gm46626							Gm46626	-1.20323	1.31249	10.577	0.00114504	0.00446138	Gm46626
	Gm46816	-1.28031	3.3517	57.3492	3.64913e-14	4.10657e-13	Gm46816							Gm46816	-1.09118	3.15752	20.4194	6.21971e-06	4.35828e-05	Gm46816
	Gm47754	-1.2934	2.14145	23.7329	1.10676e-06	5.50095e-06	Gm47754							Gm47754	-1.3525	1.93916	16.5158	4.82464e-05	0.000275925	Gm47754
	Gm4786	1.45277	1.2752	10.5691	0.00114993	0.00330187	Gm4786							Gm4786	1.18834	1.01789	11.1471	0.000841636	0.00342094	Gm4786
	Gm4841	1.56452	0.431637	13.182	0.000282654	0.000933063	Gm4841							Gm4841	2.49866	0.906889	24.6803	6.76736e-07	5.73705e-06	Gm4841
	Gm4951	1.28377	3.93043	34.5337	4.18938e-09	2.83816e-08	Gm4951							Gm4951	1.79947	4.28198	54.1313	1.87529e-13	4.2318e-12	Gm4951
	Gm51448	-2.38216	0.531377	40.1197	2.38862e-10	1.87654e-09	Gm51448							Gm51448	-2.39759	0.505398	24.3291	8.1201e-07	6.80636e-06	Gm51448
	Gm5148	1.197	4.1692	44.6263	2.38466e-11	2.05654e-10	Gm5148							Gm5148	1.11939	4.10419	36.961	1.20519e-09	1.60718e-08	Gm5148
	Gm51544	-1.28692	1.11184	18.8714	1.39832e-05	5.87501e-05	Gm51544							Gm51544	-1.48179	0.993232	17.9132	2.31213e-05	0.000142484	Gm51544
	Gm51697	-1.11306	0.288119	8.50568	0.0035404	0.00903182	Gm51697							Gm51697	-1.23828	0.334562	9.85934	0.00168972	0.0062692	Gm51697
	Gm51701	-1.3385	4.17237	87.9909	6.57565e-21	1.14277e-19	Gm51701							Gm51701	-1.277	4.01072	51.0979	8.7873e-13	1.82572e-11	Gm51701
	Gm5182	3.40439	3.6033	333.008	2.12662e-74	2.73362e-72	Gm5182							Gm5182	3.49676	3.81706	303.268	6.39289e-68	3.23046e-65	Gm5182
	Gm51871	-1.15921	1.47837	18.5162	1.68469e-05	6.9954e-05	Gm51871							Gm51871	-1.40463	1.37697	13.411	0.000250147	0.00118412	Gm51871
	Gm52013	-1.15234	2.32388	26.3569	2.83799e-07	1.5277e-06	Gm52013							Gm52013	-1.60836	2.20498	22.0212	2.6966e-06	2.03815e-05	Gm52013
	Gm52024	-1.51398	0.0197121	14.6762	0.000127651	0.000451363	Gm52024							Gm52024	-1.22193	-0.367974	7.82308	0.00515832	0.0163241	Gm52024
	Gm52528	-1.52871	0.632893	19.7614	8.77383e-06	3.82087e-05	Gm52528							Gm52528	-1.43001	0.562046	10.6265	0.0011148	0.00437295	Gm52528
	Gm52546	3.24462	3.3846	210.819	9.1028e-48	5.49521e-46	Gm52546							Gm52546	3.17479	3.41953	188.581	6.48812e-43	1.50493e-40	Gm52546
	Gm52697	-2.29956	2.74003	101.891	5.86597e-24	1.24954e-22	Gm52697							Gm52697	-2.57085	2.41763	52.4485	4.41676e-13	9.57011e-12	Gm52697
	Gm52698	1.30906	0.621113	13.8392	0.000199138	0.000675772	Gm52698							Gm52698	1.35616	0.481235	14.8031	0.000119342	0.000615817	Gm52698
	Gm52743	-1.15593	3.14507	33.2948	7.91948e-09	5.21357e-08	Gm52743							Gm52743	-1.4631	3.28288	21.8598	2.93316e-06	2.1912e-05	Gm52743
	Gm52866	-1.52694	1.84576	36.6778	1.39355e-09	9.93747e-09	Gm52866							Gm52866	-1.42871	1.34018	12.8688	0.000334097	0.00152636	Gm52866
	Gm52877	-1.51603	1.42564	34.9031	3.46534e-09	2.36917e-08	Gm52877							Gm52877	-1.95893	1.50077	26.937	2.10199e-07	1.95536e-06	Gm52877
	Gm5424	2.49585	1.027	46.8692	7.58852e-12	6.86188e-11	Gm5424							Gm5424	1.32403	1.2626	7.58923	0.00587179	0.0182033	Gm5424
	Gm5425	1.61195	0.229025	15.1284	0.00010044	0.000361018	Gm5425							Gm5425	1.20756	0.211516	9.77954	0.00176464	0.00650884	Gm5425
	Gm5431	1.18655	4.21446	59.7848	1.05819e-14	1.25128e-13	Gm5431							Gm5431	1.72567	4.44478	104.013	2.00996e-24	1.40787e-22	Gm5431
	Gm5602	1.46953	0.995892	15.373	8.8242e-05	0.000320999	Gm5602							Gm5602	1.24489	1.05283	13.0396	0.00030498	0.00140834	Gm5602
	Gm572	-1.39228	2.04908	27.817	1.33351e-07	7.53751e-07	Gm572							Gm572	-1.34944	1.71606	16.1152	5.96023e-05	0.000332401	Gm572
	Gm5805	1.71211	3.07985	22.2282	2.42096e-06	1.14709e-05	Gm5805							Gm5805	1.24516	3.28909	12.2972	0.000453638	0.00198593	Gm5805
	Gm5820	1.67193	1.25129	31.8948	1.6275e-08	1.03311e-07	Gm5820							Gm5820	1.71644	1.12464	19.0526	1.27164e-05	8.34141e-05	Gm5820
	Gm6136	1.43571	5.97259	160.997	6.85279e-37	2.79186e-35	Gm6136							Gm6136	1.40282	6.04714	101.059	8.92747e-24	5.8751e-22	Gm6136
	Gm6166	4.60938	-0.194829	62.2361	3.04648e-15	3.73877e-14	Gm6166							Gm6166	1.90417	0.213739	6.45913	0.0110384	0.031143	Gm6166
	Gm6344	1.16706	6.07516	73.3548	1.0832e-17	1.54265e-16	Gm6344							Gm6344	1.18233	6.18772	56.1469	6.7255e-14	1.58863e-12	Gm6344
	Gm6610	-1.15238	1.53008	14.8232	0.000118075	0.00041955	Gm6610							Gm6610	-1.75466	1.22348	20.0513	7.53929e-06	5.18587e-05	Gm6610
	Gm6749	-1.67695	1.7121	26.7416	2.32559e-07	1.2686e-06	Gm6749							Gm6749	-2.09873	1.3375	34.7777	3.69587e-09	4.56707e-08	Gm6749
	Gm6807	1.62766	1.8243	19.6503	9.29879e-06	4.03065e-05	Gm6807							Gm6807	1.27929	1.91117	14.0917	0.000174112	0.000858967	Gm6807
	Gm7033	-1.68267	2.42497	42.6754	6.46198e-11	5.37993e-10	Gm7033							Gm7033	-2.48286	2.11243	49.8755	1.63818e-12	3.27381e-11	Gm7033
	Gm7143	1.29673	0.882074	12.9148	0.000325993	0.00105809	Gm7143							Gm7143	1.09778	0.913378	9.82801	0.00171874	0.00635776	Gm7143
	Gm7331	1.5812	0.731284	19.3267	1.10158e-05	4.71323e-05	Gm7331							Gm7331	1.37619	0.772353	14.8534	0.000116197	0.000601564	Gm7331
	Gm7336	1.87055	3.26746	37.6225	8.58464e-10	6.27171e-09	Gm7336							Gm7336	1.58511	3.54884	37.5782	8.78215e-10	1.20173e-08	Gm7336
	Gm7609	2.14	0.251875	26.82	2.23312e-07	1.22239e-06	Gm7609							Gm7609	1.97819	0.323578	11.3494	0.000754719	0.00311509	Gm7609
	Gm7694	-1.31484	4.80939	125.367	4.23051e-29	1.19926e-27	Gm7694							Gm7694	-1.32527	4.59092	41.779	1.02195e-10	1.60662e-09	Gm7694
	Gm7997	-1.17643	1.32738	13.3642	0.000256473	0.000852491	Gm7997							Gm7997	-1.24633	1.00532	8.45654	0.00363733	0.012158	Gm7997
	Gm8129	1.93439	0.463083	15.1877	9.73375e-05	0.000350919	Gm8129							Gm8129	1.4145	0.141939	9.32585	0.00225944	0.00810361	Gm8129
	Gm8292	1.11233	1.25738	9.30507	0.00228521	0.00611993	Gm8292							Gm8292	1.05571	0.92351	6.89881	0.00862533	0.025168	Gm8292
	Gm8325	1.00397	1.35212	5.07125	0.0243259	0.0495185	Gm8325							Gm8325	1.06026	1.0109	8.31006	0.00394261	0.0130458	Gm8325
	Gm8451	1.03861	0.428153	8.36503	0.00382511	0.009677	Gm8451							Gm8451	1.07681	0.550502	8.1341	0.00434403	0.0141458	Gm8451
	Gm8730	1.08912	1.92135	21.366	3.79439e-06	1.74678e-05	Gm8730							Gm8730	1.25661	1.99191	19.394	1.06341e-05	7.07619e-05	Gm8730
	Gm8995	1.29602	8.14496	106.052	7.18162e-25	1.6103e-23	Gm8995							Gm8995	1.47714	8.22782	66.9286	2.81527e-16	8.97147e-15	Gm8995
	Gm9054	-1.09411	0.218182	8.08629	0.00446013	0.0110602	Gm9054							Gm9054	-1.17596	-0.0189219	8.46414	0.00362217	0.0121158	Gm9054
	Gm9118	1.2308	1.7635	18.5299	1.67259e-05	6.95096e-05	Gm9118							Gm9118	1.02752	1.78316	12.4233	0.00042401	0.00187537	Gm9118
	Gm9157	-1.0272	0.709635	10.6369	0.00110853	0.00319593	Gm9157							Gm9157	-1.59593	0.505403	19.7401	8.8718e-06	6.01183e-05	Gm9157
	Gm9493	1.01761	3.11135	25.6682	4.05449e-07	2.13854e-06	Gm9493							Gm9493	1.18088	3.16943	25.1668	5.25806e-07	4.55008e-06	Gm9493
	Gm9616	1.29486	5.13389	67.8833	1.7346e-16	2.29296e-15	Gm9616							Gm9616	1.21318	5.18779	56.0014	7.24211e-14	1.70497e-12	Gm9616
	Gm9618	-2.44744	-0.142171	26.9324	2.10701e-07	1.15932e-06	Gm9618							Gm9618	-2.66598	-0.382515	23.9754	9.75757e-07	8.08645e-06	Gm9618
	Gm9794	1.6504	6.75854	97.4278	5.58565e-23	1.12856e-21	Gm9794							Gm9794	1.50706	6.70779	87.1527	1.00456e-20	4.85101e-19	Gm9794
	Gm9843	1.42382	4.0816	57.6697	3.10036e-14	3.50755e-13	Gm9843							Gm9843	1.09847	3.82744	33.4146	7.44639e-09	8.74348e-08	Gm9843
	Gm9899	4.37477	-0.167718	55.8331	7.88921e-14	8.54459e-13	Gm9899							Gm9899	4.62398	-0.193907	49.6854	1.80485e-12	3.57158e-11	Gm9899
	Gnas	2.05038	10.2507	398.146	1.39463e-88	2.26036e-86	Gnas							Gnas	2.08835	10.2828	77.6345	1.23983e-18	4.92761e-17	Gnas
	Gng12	1.99263	7.20441	438.501	2.29427e-97	4.22345e-95	Gng12							Gng12	1.88843	7.22084	184.598	4.80261e-42	1.0786e-39	Gng12
	Gng5	1.12649	6.31066	128.888	7.17472e-30	2.11846e-28	Gng5							Gng5	1.22274	6.37171	67.6959	1.90758e-16	6.19044e-15	Gng5
	Gnptab	1.63099	6.41753	289.087	7.86168e-65	7.76328e-63	Gnptab							Gnptab	1.61319	6.48966	183.693	7.5709e-42	1.67376e-39	Gnptab
	Got1	1.67766	6.12085	259.182	2.58714e-58	2.17948e-56	Got1							Got1	1.84159	6.13853	156.558	6.39477e-36	9.72899e-34	Got1
	Gp9	-1.80414	3.92463	209.696	1.60042e-47	9.58391e-46	Gp9							Gp9	-2.19488	3.86613	117.548	2.17737e-27	1.92548e-25	Gp9
	Gpd1	-1.18675	3.41568	48.4581	3.37418e-12	3.15241e-11	Gpd1							Gpd1	-1.12999	3.35308	25.2624	5.00377e-07	4.35147e-06	Gpd1
	Gpd2	1.5457	3.73481	125.992	3.08739e-29	8.88727e-28	Gpd2							Gpd2	1.46854	3.8073	54.1063	1.89933e-13	4.27924e-12	Gpd2
	Gper1	1.19597	1.59223	10.5946	0.00113419	0.0032592	Gper1							Gper1	1.29113	1.57057	7.29107	0.00692982	0.021003	Gper1
	Gpi1	1.64344	8.1531	300.935	2.06111e-67	2.13425e-65	Gpi1							Gpi1	1.55384	8.27213	87.6935	7.64269e-21	3.72884e-19	Gpi1
	Gpm6b	2.55807	4.54322	48.71	2.96747e-12	2.79166e-11	Gpm6b							Gpm6b	1.43635	4.07146	30.1348	4.03029e-08	4.23345e-07	Gpm6b
	Gpr132	-1.46263	1.31699	26.9982	2.03642e-07	1.12463e-06	Gpr132							Gpr132	-1.43175	1.40805	7.67447	0.00560075	0.0174934	Gpr132
	Gpr137c	1.78234	2.28496	53.4272	2.68351e-13	2.77874e-12	Gpr137c							Gpr137c	2.24599	2.46398	43.2789	4.74663e-11	7.86417e-10	Gpr137c
	Gpr150	-1.64221	1.20003	34.4739	4.3201e-09	2.91876e-08	Gpr150							Gpr150	-1.22527	0.937391	11.2203	0.000809056	0.00330561	Gpr150
	Gpr153	1.52899	1.62853	23.1556	1.49411e-06	7.29013e-06	Gpr153							Gpr153	1.65698	1.75532	23.5591	1.21136e-06	9.80526e-06	Gpr153
	Gpr162	1.06199	4.92404	57.2956	3.74998e-14	4.21054e-13	Gpr162							Gpr162	1.16591	4.75161	29.4113	5.8535e-08	5.97124e-07	Gpr162
	Gpr165	-2.20776	4.52779	125.476	4.00437e-29	1.13949e-27	Gpr165							Gpr165	-2.39056	4.49668	108.704	1.88442e-25	1.44122e-23	Gpr165
	Gpr65	2.2377	5.36653	304.705	3.11027e-68	3.31266e-66	Gpr65							Gpr65	1.94963	5.29036	136.59	1.4822e-31	1.71898e-29	Gpr65
	Gprasp2	-1.1485	5.06661	133.468	7.14371e-31	2.19629e-29	Gprasp2							Gprasp2	-1.08114	5.04349	51.4023	7.52514e-13	1.57972e-11	Gprasp2
	Gpx3	1.52503	3.66186	47.0941	6.76599e-12	6.14794e-11	Gpx3							Gpx3	1.11895	3.83155	14.898	0.000113485	0.000589899	Gpx3
	Grap	-1.44606	5.57658	247.254	1.03088e-55	8.13306e-54	Grap							Grap	-1.73849	5.62384	120.861	4.09878e-28	3.81537e-26	Grap
	Grasp	1.07012	1.92157	9.34509	0.00223583	0.006003	Grasp							Grasp	1.40442	1.8378	18.3141	1.87316e-05	0.000118319	Grasp
	Grrp1	1.42244	0.776995	11.2034	0.000816493	0.00243154	Grrp1							Grrp1	1.05193	0.698309	6.22397	0.0126032	0.0347203	Grrp1
	Grtp1	-1.17032	0.652058	8.19968	0.00418978	0.0104943	Grtp1							Grtp1	-1.1187	0.481341	8.96929	0.00274556	0.00958946	Grtp1
	Gsto1	1.32171	5.13392	132.252	1.31801e-30	4.01079e-29	Gsto1							Gsto1	1.14111	5.0713	52.8406	3.61745e-13	7.9354e-12	Gsto1
	Gtf3c4	1.44725	6.82715	246.698	1.36272e-55	1.06945e-53	Gtf3c4							Gtf3c4	1.65304	6.90873	127.135	1.73586e-29	1.76696e-27	Gtf3c4
	Gucy2g	1.67203	-0.246417	9.98168	0.00158106	0.00438852	Gucy2g							Gucy2g	1.67145	-0.238538	12.6008	0.000385582	0.0017285	Gucy2g
	Gusb	1.70025	9.1598	362.494	8.06353e-81	1.17878e-78	Gusb							Gusb	1.73907	9.1561	91.778	9.69675e-22	5.14116e-20	Gusb
	Gvin1	1.03425	4.03267	39.455	3.35712e-10	2.58965e-09	Gvin1							Gvin1	1.45582	4.18675	40.9199	1.58595e-10	2.42329e-09	Gvin1
	Gvin2	1.0172	4.29882	57.8664	2.8054e-14	3.18351e-13	Gvin2							Gvin2	1.25806	4.33245	40.4457	2.02161e-10	3.0527e-09	Gvin2
	Gvin3	2.25202	5.7675	175.711	4.18834e-40	1.91571e-38	Gvin3							Gvin3	2.39883	6.09427	155.248	1.23584e-35	1.84062e-33	Gvin3
	Gvin-ps6	2.94638	-0.229265	22.3346	2.29039e-06	1.08903e-05	Gvin-ps6							Gvin-ps6	2.91225	-0.23952	34.081	5.28647e-09	6.36581e-08	Gvin-ps6
	Gyg	1.7824	5.4302	244.283	4.58015e-55	3.53858e-53	Gyg							Gyg	1.67659	5.52486	86.879	1.15365e-20	5.49598e-19	Gyg
	H1f2	1.30655	5.07228	14.0541	0.000177622	0.000609836	H1f2							H1f2	1.61426	5.77192	22.8814	1.72307e-06	1.34993e-05	H1f2
	H1f3	1.91983	0.509721	10.1725	0.00142549	0.00400669	H1f3							H1f3	2.85435	1.86511	21.8301	2.97897e-06	2.22425e-05	H1f3
	H2-Aa	1.43018	7.87209	33.1229	8.6515e-09	5.66546e-08	H2-Aa							H2-Aa	1.59154	8.24978	23.1828	1.47311e-06	1.17095e-05	H2-Aa
	H2-Ab1	1.35517	7.8628	35.6634	2.3453e-09	1.6311e-08	H2-Ab1							H2-Ab1	1.37711	8.18906	20.8842	4.87901e-06	3.50066e-05	H2-Ab1
	H2bc4	1.19354	4.81231	20.892	4.85912e-06	2.20696e-05	H2bc4							H2bc4	1.69958	5.45167	48.6319	3.08803e-12	5.93649e-11	H2bc4
	H2-D1	1.91137	10.4613	207.747	4.25903e-47	2.51014e-45	H2-D1							H2-D1	1.97081	10.6544	64.3154	1.06013e-15	3.12494e-14	H2-D1
	H2-K1	1.47618	9.45383	140.218	2.38475e-32	7.90199e-31	H2-K1							H2-K1	1.5845	9.62176	53.3508	2.78996e-13	6.16237e-12	H2-K1
	H2-M3	1.0799	6.20799	113.375	1.78605e-26	4.35872e-25	H2-M3							H2-M3	1.1832	6.26162	78.2774	8.95404e-19	3.63011e-17	H2-M3
	H2-Q4	1.2827	6.88908	110.849	6.38497e-26	1.51602e-24	H2-Q4							H2-Q4	1.39198	7.01916	70.0815	5.69041e-17	1.96855e-15	H2-Q4
	H2-Q5	1.97681	3.68016	108.747	1.84351e-25	4.2817e-24	H2-Q5							H2-Q5	2.15085	3.80831	66.2348	4.00282e-16	1.24749e-14	H2-Q5
	H2-Q6	2.01905	1.80244	27.3426	1.70418e-07	9.51724e-07	H2-Q6							H2-Q6	2.59452	2.43009	36.5838	1.46242e-09	1.92481e-08	H2-Q6
	H2-Q7	2.65472	2.47251	59.4212	1.27291e-14	1.49688e-13	H2-Q7							H2-Q7	2.82176	2.66917	60.1385	8.84108e-15	2.34256e-13	H2-Q7
	H2-Q9	2.12956	1.52096	24.1914	8.72197e-07	4.39369e-06	H2-Q9							H2-Q9	2.85861	1.51583	48.3733	3.52333e-12	6.70047e-11	H2-Q9
	H2-T-ps	1.75373	1.39731	30.9628	2.63027e-08	1.62469e-07	H2-T-ps							H2-T-ps	1.53506	1.43224	19.8992	8.1634e-06	5.56645e-05	H2-T-ps
	Hacd2	1.46734	5.64249	234.954	4.95417e-53	3.53453e-51	Hacd2							Hacd2	1.45381	5.64529	104.401	1.65207e-24	1.17463e-22	Hacd2
	Hcar2	3.37088	6.33041	417.727	7.62574e-93	1.32218e-90	Hcar2							Hcar2	2.51876	6.58495	42.849	5.91317e-11	9.58367e-10	Hcar2
	Hcst	1.44016	3.47341	59.5908	1.1678e-14	1.37653e-13	Hcst							Hcst	1.29341	3.3599	30.5339	3.28091e-08	3.48772e-07	Hcst
	Hdgfl3	-1.16787	4.09193	60.7885	6.35467e-15	7.66002e-14	Hdgfl3							Hdgfl3	-1.86065	3.90638	94.433	2.53531e-22	1.44065e-20	Hdgfl3
	Hectd2	1.66935	3.63392	134.45	4.35463e-31	1.34993e-29	Hectd2							Hectd2	2.20554	3.82913	125.545	3.8672e-29	3.85024e-27	Hectd2
	Hectd2os	6.94318	0.270962	117.675	2.04217e-27	5.22313e-26	Hectd2os							Hectd2os	6.35304	0.338803	93.6107	3.84098e-22	2.12289e-20	Hectd2os
	Helz2	1.56526	4.93462	41.217	1.36229e-10	1.09564e-09	Helz2							Helz2	1.97954	5.2282	57.9877	2.63766e-14	6.53594e-13	Helz2
	Hepacam2	-2.05757	0.0305462	18.6564	1.56522e-05	6.53572e-05	Hepacam2							Hepacam2	-2.40357	0.0890424	19.5866	9.61395e-06	6.456e-05	Hepacam2
	Hexa	1.36003	10.4394	179.11	7.5825e-41	3.55543e-39	Hexa							Hexa	1.42473	10.4635	42.9825	5.52306e-11	9.03419e-10	Hexa
	Hgf	1.14675	2.55745	34.4033	4.47969e-09	3.01565e-08	Hgf							Hgf	1.05161	2.68713	12.0916	0.000506492	0.0021882	Hgf
	Hif1a	2.5653	8.81793	781.754	5.00262e-172	1.963e-169	Hif1a							Hif1a	2.60793	8.97794	213.359	2.54152e-48	7.65105e-46	Hif1a
	Hjurp	-1.01249	6.75901	125.596	3.76918e-29	1.07461e-27	Hjurp							Hjurp	-1.00536	6.63906	46.3194	1.00467e-11	1.81083e-10	Hjurp
	Hlf	-2.20641	4.26702	228.23	1.44972e-51	9.91594e-50	Hlf							Hlf	-2.32981	4.02587	56.158	6.68751e-14	1.5823e-12	Hlf
	Hmcn2	1.34391	0.658978	6.76898	0.00927557	0.0211906	Hmcn2							Hmcn2	1.20095	-0.0625932	8.8463	0.00293684	0.0101424	Hmcn2
	Hmgn3	1.54032	3.68184	125.454	4.04814e-29	1.14975e-27	Hmgn3							Hmgn3	1.45558	3.69405	65.5802	5.57972e-16	1.70513e-14	Hmgn3
	Hpse	6.71305	6.33914	1432.15	2.17252654585006e-313	4.62779190359576e-310	Hpse							Hpse	5.7084	6.45746	143.07	5.67563e-33	7.36738e-31	Hpse
	Hs3st1	3.47257	2.08897	102.905	3.51551e-24	7.60809e-23	Hs3st1							Hs3st1	2.73027	1.55611	36.2583	1.72822e-09	2.25369e-08	Hs3st1
	Hsf2bp	-2.32697	3.37929	120.469	4.99465e-28	1.33708e-26	Hsf2bp							Hsf2bp	-2.65163	3.18466	44.5534	2.47512e-11	4.25005e-10	Hsf2bp
	Hsf4	1.95693	1.74085	60.7976	6.32563e-15	7.63119e-14	Hsf4							Hsf4	1.68126	1.36105	21.9031	2.86766e-06	2.15135e-05	Hsf4
	Hspa12a	1.00213	4.89299	77.594	1.26553e-18	1.92554e-17	Hspa12a							Hspa12a	1.27374	4.81658	66.7756	3.04248e-16	9.65203e-15	Hspa12a
	Htr2c	-1.36469	1.92674	9.48675	0.00206961	0.00560376	Htr2c							Htr2c	-2.13308	2.00793	10.2493	0.00136738	0.00521205	Htr2c
	Idi1	1.63659	2.4712	65.1741	6.85645e-16	8.70099e-15	Idi1							Idi1	1.293	2.42594	18.2901	1.89689e-05	0.000119604	Idi1
	Ier3	1.09479	5.27937	22.3422	2.28138e-06	1.08509e-05	Ier3							Ier3	1.18548	5.52623	18.0277	2.17712e-05	0.000135343	Ier3
	Ier5l	1.20565	0.984236	15.8176	6.97524e-05	0.00025879	Ier5l							Ier5l	1.21942	0.883127	8.68402	0.00321012	0.0109393	Ier5l
	Ifi204	2.15959	5.69334	96.9781	7.00985e-23	1.40301e-21	Ifi204							Ifi204	2.32285	5.99691	110.458	7.77659e-26	6.11283e-24	Ifi204
	Ifi206	1.49534	2.71053	17.7277	2.54891e-05	0.000102196	Ifi206							Ifi206	2.77287	3.24117	78.8333	6.75795e-19	2.75557e-17	Ifi206
	Ifi207	2.07206	5.27236	158.98	1.89042e-36	7.61837e-35	Ifi207							Ifi207	2.21652	5.57951	86.0974	1.71287e-20	8.10546e-19	Ifi207
	Ifi209	1.06867	4.7937	24.1412	8.95254e-07	4.49466e-06	Ifi209							Ifi209	1.43568	5.08088	37.2941	1.0159e-09	1.37419e-08	Ifi209
	Ifi211	2.01417	3.0607	67.465	2.1446e-16	2.81746e-15	Ifi211							Ifi211	2.24952	3.41859	44.4199	2.64977e-11	4.53893e-10	Ifi211
	Ifi213	1.29785	4.46534	23.807	1.06496e-06	5.30915e-06	Ifi213							Ifi213	1.52364	4.81453	50.6906	1.08135e-12	2.22708e-11	Ifi213
	Ifi27l2a	3.21783	5.42895	318.963	2.43667e-71	2.88359e-69	Ifi27l2a							Ifi27l2a	2.99184	5.69975	146.037	1.27445e-33	1.70115e-31	Ifi27l2a
	Ifi44	2.88623	2.52374	91.8827	9.19679e-22	1.6993e-20	Ifi44							Ifi44	3.2675	3.03558	57.9977	2.62426e-14	6.51416e-13	Ifi44
	Ifit1	1.37997	3.12874	23.6599	1.14955e-06	5.70037e-06	Ifit1							Ifit1	1.95556	3.42151	33.1359	8.59352e-09	1.00074e-07	Ifit1
	Ifit2	1.78998	5.54775	38.9283	4.39671e-10	3.33975e-09	Ifit2							Ifit2	2.42407	5.8637	93.7565	3.56829e-22	1.9877e-20	Ifit2
	Ifit3	1.34768	5.03537	26.6525	2.43532e-07	1.32305e-06	Ifit3							Ifit3	2.06969	5.22049	71.4831	2.79643e-17	9.81804e-16	Ifit3
	Ifit3b	1.49344	2.70708	17.8434	2.39852e-05	9.66345e-05	Ifit3b							Ifit3b	1.66428	2.66731	23.7339	1.10619e-06	9.05754e-06	Ifit3b
	Ifitm3	2.0006	5.47286	106.616	5.40303e-25	1.21883e-23	Ifitm3							Ifitm3	1.86338	5.88127	31.499	1.99539e-08	2.18859e-07	Ifitm3
	Igbp1	1.05076	5.77649	93.6395	3.78548e-22	7.20885e-21	Igbp1							Igbp1	1.04172	5.8118	61.8285	3.74719e-15	1.03553e-13	Igbp1
	Igf1	5.83645	7.30756	799.081	8.54927e-176	3.64223e-173	Igf1							Igf1	5.07156	7.3964	169.005	1.22023e-38	2.1055e-36	Igf1
	Igfbp2	-1.0822	3.14182	10.6018	0.00112978	0.00324964	Igfbp2							Igfbp2	-1.90422	2.81139	16.6704	4.44686e-05	0.000257758	Igfbp2
	Igfbp5	4.60858	4.22021	311.506	1.0262e-69	1.14192e-67	Igfbp5							Igfbp5	4.40062	4.43573	146.737	8.95985e-34	1.21897e-31	Igfbp5
	Igsf10	1.72183	2.70196	67.9063	1.71455e-16	2.26847e-15	Igsf10							Igsf10	2.22367	2.83603	79.6068	4.56842e-19	1.89556e-17	Igsf10
	Il12rb2	1.04116	3.65797	49.4785	2.0056e-12	1.92814e-11	Il12rb2							Il12rb2	1.32824	3.47279	37.472	9.27349e-10	1.26285e-08	Il12rb2
	Il18bp	1.01799	3.08253	22.7192	1.87482e-06	9.00045e-06	Il18bp							Il18bp	1.24415	3.32777	19.5489	9.80572e-06	6.56918e-05	Il18bp
	Il1bos	-1.73423	0.980406	22.1755	2.48826e-06	1.17673e-05	Il1bos							Il1bos	-1.6822	0.809809	13.9582	0.000186925	0.000915157	Il1bos
	Il1r1	2.35339	3.79649	236.24	2.59807e-53	1.89901e-51	Il1r1							Il1r1	2.10683	3.88111	107.951	2.75565e-25	2.08501e-23	Il1r1
	Il27ra	1.75611	1.1544	34.8319	3.5944e-09	2.45628e-08	Il27ra							Il27ra	1.79303	1.28579	18.9431	1.34676e-05	8.80558e-05	Il27ra
	Il3ra	2.48427	4.88006	211.293	7.1736e-48	4.36594e-46	Il3ra							Il3ra	2.4802	4.87307	205.226	1.51167e-46	4.11319e-44	Il3ra
	Il7r	-2.00901	4.0645	279.245	1.09704e-62	1.04191e-60	Il7r							Il7r	-1.95599	4.20076	110.997	5.92593e-26	4.81873e-24	Il7r
	Ildr1	-1.45971	2.6616	43.7171	3.79441e-11	3.21834e-10	Ildr1							Ildr1	-1.28949	2.69791	30.6837	3.03705e-08	3.24311e-07	Ildr1
	Inf2	3.12549	5.19074	355.081	3.3174e-79	4.58016e-77	Inf2							Inf2	2.48366	5.28742	45.5576	1.48216e-11	2.61485e-10	Inf2
	Insig1	1.75225	5.15053	227.496	2.09576e-51	1.41028e-49	Insig1							Insig1	1.56031	4.96815	104.8	1.35139e-24	9.85606e-23	Insig1
	Iqcd	-1.25216	0.151583	9.59407	0.00195206	0.00531057	Iqcd							Iqcd	-1.41814	0.139396	12.8835	0.000331499	0.00151645	Iqcd
	Iqcg	1.79256	1.26218	32.1235	1.44676e-08	9.22299e-08	Iqcg							Iqcg	2.18018	1.3314	34.0878	5.26819e-09	6.3492e-08	Iqcg
	Irf4	-1.48264	3.3733	52.8196	3.6564e-13	3.73941e-12	Irf4							Irf4	-1.35938	3.36392	32.4088	1.24922e-08	1.41515e-07	Irf4
	Irf7	1.43366	4.91256	29.7965	4.79856e-08	2.86779e-07	Irf7							Irf7	1.75253	5.20039	47.2898	6.12312e-12	1.13547e-10	Irf7
	Irs3	-1.09331	1.14121	14.2672	0.000158605	0.00054948	Irs3							Irs3	-1.10565	0.499122	10.0714	0.00150586	0.00567264	Irs3
	Isg15	1.13771	3.51144	17.2268	3.31723e-05	0.000130441	Isg15							Isg15	1.60186	3.76976	28.7217	8.35634e-08	8.32047e-07	Isg15
	Itga5	1.14257	6.24186	155.363	1.16617e-35	4.52832e-34	Itga5							Itga5	1.00906	6.20728	43.1063	5.18458e-11	8.51005e-10	Itga5
	Itga9	-1.3997	6.4327	163.14	2.33111e-37	9.60198e-36	Itga9							Itga9	-1.23771	6.43129	85.1281	2.79645e-20	1.30155e-18	Itga9
	Itgax	4.85216	9.15601	1113.62	3.61642e-244	3.85174e-241	Itgax							Itgax	4.45509	9.3193	131.407	2.01755e-30	2.1791e-28	Itgax
	Ivns1abp	-1.17342	10.8873	142.016	9.64694e-33	3.27666e-31	Ivns1abp							Ivns1abp	-1.15036	10.773	25.2275	5.09517e-07	4.42551e-06	Ivns1abp
	Kbtbd11	2.07126	3.67511	167.952	2.07255e-38	8.85496e-37	Kbtbd11							Kbtbd11	1.67476	3.77758	57.1882	3.96033e-14	9.67716e-13	Kbtbd11
	Kcna7	1.11132	1.0163	11.2276	0.000805884	0.00240235	Kcna7							Kcna7	1.26078	0.569606	10.1931	0.00140967	0.00535592	Kcna7
	Kcnd1	-1.41088	6.14118	135.938	2.05881e-31	6.50402e-30	Kcnd1							Kcnd1	-1.36015	5.97475	71.7044	2.4997e-17	8.84205e-16	Kcnd1
	Kcng2	-1.49205	0.343634	15.6868	7.47421e-05	0.000275725	Kcng2							Kcng2	-1.72856	0.263767	17.0734	3.59633e-05	0.0002138	Kcng2
	Kcnh2	3.96616	3.72385	165.056	8.89414e-38	3.70449e-36	Kcnh2							Kcnh2	3.77083	3.84747	82.8048	9.05698e-20	4.01716e-18	Kcnh2
	Kcnip3	-1.05802	4.68414	44.4986	2.54537e-11	2.18881e-10	Kcnip3							Kcnip3	-1.25326	4.61829	42.3355	7.68854e-11	1.22644e-09	Kcnip3
	Kcnj2	2.28534	7.89071	475.467	2.07075e-105	4.41099e-103	Kcnj2							Kcnj2	2.02424	7.829	143.186	5.35265e-33	7.01246e-31	Kcnj2
	Kcnk12	-1.5458	4.80338	172.169	2.48551e-39	1.09004e-37	Kcnk12							Kcnk12	-1.63643	4.60538	85.2463	2.63427e-20	1.23011e-18	Kcnk12
	Kcnk3	5.20075	2.09718	162.197	3.74762e-37	1.53942e-35	Kcnk3							Kcnk3	5.50611	2.14252	82.163	1.25315e-19	5.48941e-18	Kcnk3
	Kcnk9	6.06748	5.05672	510.258	5.57344e-113	1.27855e-110	Kcnk9							Kcnk9	6.5078	5.3298	788.18	2.00419e-173	1.41786e-169	Kcnk9
	Kcnq3	1.48335	0.38103	9.07253	0.00259479	0.00685521	Kcnq3							Kcnq3	1.32378	0.406783	10.1558	0.00143851	0.0054494	Kcnq3
	Kcp	-1.3692	2.82536	59.5605	1.1859e-14	1.39566e-13	Kcp							Kcp	-1.78399	2.70598	45.4834	1.53939e-11	2.70569e-10	Kcp
	Kdf1	2.89069	-0.0783129	38.1414	6.5798e-10	4.88603e-09	Kdf1							Kdf1	3.09796	0.0688046	48.6655	3.03565e-12	5.85967e-11	Kdf1
	Khdrbs3	-1.13581	4.9189	110.663	7.01328e-26	1.65729e-24	Khdrbs3							Khdrbs3	-1.25956	4.81536	88.2356	5.81061e-21	2.86461e-19	Khdrbs3
	Kif1a	3.74979	5.10059	210.084	1.31661e-47	7.91612e-46	Kif1a							Kif1a	3.50238	5.3455	119.028	1.03241e-27	9.42422e-26	Kif1a
	Kif5a	3.7135	6.39745	45.3453	1.65184e-11	1.4463e-10	Kif5a							Kif5a	2.16031	5.91265	9.85989	0.00168921	0.0062692	Kif5a
	Kl	-1.21315	4.02461	11.8742	0.000569169	0.00175639	Kl							Kl	-1.8865	3.97093	14.325	0.000153808	0.000771164	Kl
	Klf7	-1.15371	5.79892	89.4336	3.17099e-21	5.64232e-20	Klf7							Klf7	-1.49118	5.68864	132.241	1.32524e-30	1.47644e-28	Klf7
	Klhl23	-1.12719	4.49421	115.965	4.83763e-27	1.21642e-25	Klhl23							Klhl23	-1.22882	4.30563	54.5513	1.5144e-13	3.46158e-12	Klhl23
	Klk9	-1.59452	1.56781	29.7569	4.89774e-08	2.92004e-07	Klk9							Klk9	-2.09818	1.11181	25.719	3.94913e-07	3.49445e-06	Klk9
	Klra2	-1.15398	1.73868	20.5088	5.9359e-06	2.65637e-05	Klra2							Klra2	-1.86558	1.81049	16.3183	5.3544e-05	0.000302433	Klra2
	Klrb1a	6.47697	-0.159314	69.2266	8.7777e-17	1.18127e-15	Klrb1a							Klrb1a	2.96733	-0.0642402	41.43	1.2217e-10	1.89331e-09	Klrb1a
	Klrb1b	3.25205	3.04233	221.942	3.4099e-50	2.21065e-48	Klrb1b							Klrb1b	3.34893	3.54036	104.1	1.92326e-24	1.36061e-22	Klrb1b
	Klrb1c	2.44488	1.12416	53.2131	2.99249e-13	3.08583e-12	Klrb1c							Klrb1c	2.6079	0.974459	39.6056	3.10787e-10	4.55681e-09	Klrb1c
	Klrd1	-2.08413	1.32852	54.4215	1.61786e-13	1.70607e-12	Klrd1							Klrd1	-1.9057	1.2521	29.2309	6.42449e-08	6.51613e-07	Klrd1
	Kmo	-1.36911	0.223278	13.2174	0.000277354	0.000916814	Kmo							Kmo	-2.29474	0.179617	20.4566	6.09985e-06	4.28322e-05	Kmo
	Kng2	-1.57554	0.76374	18.3954	1.79489e-05	7.4117e-05	Kng2							Kng2	-2.4182	0.678411	32.3065	1.3167e-08	1.48683e-07	Kng2
	Kynu	3.13077	2.90607	167.584	2.49395e-38	1.05947e-36	Kynu							Kynu	3.37986	2.90774	99.5103	1.95146e-23	1.23264e-21	Kynu
	Lamc1	1.14099	4.86632	71.0696	3.44849e-17	4.78329e-16	Lamc1							Lamc1	1.30519	4.90555	81.2277	2.01148e-19	8.62438e-18	Lamc1
	Lamtor3-ps	-1.031	3.65674	32.4623	1.21527e-08	7.80064e-08	Lamtor3-ps							Lamtor3-ps	-1.45615	3.53361	24.2478	8.47031e-07	7.0957e-06	Lamtor3-ps
	Lancl2	1.42979	1.93091	37.0628	1.14385e-09	8.23961e-09	Lancl2							Lancl2	1.16095	1.86399	13.5582	0.00023128	0.0011033	Lancl2
	Lbp	-1.38721	1.39572	10.5274	0.00117621	0.00336851	Lbp							Lbp	-1.64937	1.26485	10.1178	0.00146844	0.00554645	Lbp
	Ldha	1.52539	7.736	197.341	7.94583e-45	4.30838e-43	Ldha							Ldha	1.13838	7.9008	33.6149	6.71751e-09	7.98707e-08	Ldha
	Ldlr	2.99484	5.37263	454.296	8.37925e-101	1.64399e-98	Ldlr							Ldlr	2.49197	5.21516	133.5	7.02785e-31	7.95496e-29	Ldlr
	Ldlrad3	4.17446	4.0992	439.308	1.5311e-97	2.85378e-95	Ldlrad3							Ldlrad3	3.89882	4.10855	165.657	6.57226e-38	1.09401e-35	Ldlrad3
	Lfng	-1.14201	6.11127	111.06	5.7395e-26	1.3715e-24	Lfng							Lfng	-1.25111	6.07734	78.8914	6.5621e-19	2.69122e-17	Lfng
	Lgals3bp	2.66749	9.66799	339.711	7.3768e-76	9.82103e-74	Lgals3bp							Lgals3bp	2.9784	9.94158	204.443	2.24084e-46	5.9822e-44	Lgals3bp
	Lgals4	-1.19421	2.40977	33.1701	8.44391e-09	5.53681e-08	Lgals4							Lgals4	-1.38608	2.22971	22.5097	2.09081e-06	1.61126e-05	Lgals4
	Lgi2	7.94668	5.40626	885.036	1.75743e-194	8.735e-192	Lgi2							Lgi2	6.97115	5.35768	324.155	1.80217e-72	1.15904e-69	Lgi2
	Lilrb4a	3.15244	7.87408	783.036	2.63298e-172	1.06109e-169	Lilrb4a							Lilrb4a	2.276	7.76092	50.3004	1.31925e-12	2.67422e-11	Lilrb4a
	Lin7b	-1.15984	0.853944	14.8119	0.000118786	0.00042159	Lin7b							Lin7b	-1.73671	0.451025	20.2717	6.71875e-06	4.67603e-05	Lin7b
	Lingo1	3.59608	0.782071	75	4.70706e-18	6.8609e-17	Lingo1							Lingo1	3.26592	0.363247	35.3323	2.77989e-09	3.52128e-08	Lingo1
	LOC102631992	-1.64298	5.45061	115.414	6.38791e-27	1.60084e-25	LOC102631992							LOC102631992	-1.5826	5.14345	68.9276	1.02144e-16	3.41664e-15	LOC102631992
	LOC102636563	-1.92285	-0.159749	17.8965	2.33248e-05	9.44842e-05	LOC102636563							LOC102636563	-1.84717	-0.332535	14.5766	0.000134578	0.000684698	LOC102636563
	LOC102639987	-1.36624	0.623279	16.347	5.27394e-05	0.000200509	LOC102639987							LOC102639987	-1.94281	0.365597	20.2302	6.86609e-06	4.75984e-05	LOC102639987
	LOC108167736	-1.34635	4.85709	54.0313	1.97324e-13	2.06187e-12	LOC108167736							LOC108167736	-1.36293	4.61583	42.1057	8.64727e-11	1.36704e-09	LOC108167736
	LOC115488490	2.50749	0.0138449	26.2011	3.0765e-07	1.64776e-06	LOC115488490							LOC115488490	3.83863	-0.294347	56.3719	5.99813e-14	1.43357e-12	LOC115488490
	LOC115490435	-1.49882	1.14098	23.6753	1.14039e-06	5.65868e-06	LOC115490435							LOC115490435	-1.85424	0.88716	20.3949	6.2997e-06	4.40823e-05	LOC115490435
	LOC118567423	-1.38014	0.244609	14.1456	0.000169195	0.000582648	LOC118567423							LOC118567423	-1.0113	0.379067	7.446	0.00635777	0.0195048	LOC118567423
	LOC118567435	1.50737	0.207591	12.5682	0.000392371	0.00125389	LOC118567435							LOC118567435	1.91957	0.145785	20.248	6.80262e-06	4.72278e-05	LOC118567435
	LOC118567482	-1.93094	0.28592	19.008	1.30173e-05	5.49395e-05	LOC118567482							LOC118567482	-2.67907	-0.0126597	34.6308	3.98555e-09	4.90361e-08	LOC118567482
	LOC118567557	3.43697	0.143895	51.3289	7.81166e-13	7.80172e-12	LOC118567557							LOC118567557	3.06758	0.445571	48.1106	4.02834e-12	7.60975e-11	LOC118567557
	LOC118567690	1.153	2.13966	29.2298	6.42825e-08	3.77369e-07	LOC118567690							LOC118567690	1.07958	1.97086	13.847	0.00019831	0.000963894	LOC118567690
	LOC118567734	-1.14208	3.80998	51.0331	9.08201e-13	9.01011e-12	LOC118567734							LOC118567734	-1.36243	3.65145	33.3313	7.77213e-09	9.1033e-08	LOC118567734
	LOC118567790	-1.65711	1.54938	33.7126	6.38863e-09	4.24892e-08	LOC118567790							LOC118567790	-1.53122	1.21041	15.0452	0.000104967	0.000551293	LOC118567790
	LOC118567856	1.05009	1.87385	15.6665	7.55519e-05	0.000278506	LOC118567856							LOC118567856	1.10096	1.83631	9.06453	0.00260615	0.0091477	LOC118567856
	LOC118567875	2.23762	1.72817	67.8561	1.75874e-16	2.32076e-15	LOC118567875							LOC118567875	2.71505	1.6986	45.5361	1.4985e-11	2.6371e-10	LOC118567875
	LOC118567924	2.40774	5.14593	52.4238	4.47263e-13	4.53992e-12	LOC118567924							LOC118567924	2.04512	5.47298	102.436	4.45433e-24	3.03001e-22	LOC118567924
	LOC118568037	-1.69854	2.95191	93.6067	3.84887e-22	7.32021e-21	LOC118568037							LOC118568037	-1.53852	2.76883	29.9562	4.41922e-08	4.61118e-07	LOC118568037
	LOC118568063	-1.87845	1.08375	27.5059	1.56614e-07	8.79572e-07	LOC118568063							LOC118568063	-1.83195	1.08485	17.5087	2.85994e-05	0.000173596	LOC118568063
	LOC118568068	-1.67186	2.07182	42.0295	8.99053e-11	7.38204e-10	LOC118568068							LOC118568068	-1.9525	1.56792	30.2498	3.79837e-08	3.9928e-07	LOC118568068
	LOC118568088	2.26958	1.40371	64.3961	1.0176e-15	1.28046e-14	LOC118568088							LOC118568088	2.47282	1.23686	38.1577	6.52501e-10	9.0958e-09	LOC118568088
	LOC118568295	-1.30839	0.926997	18.6669	1.55662e-05	6.50343e-05	LOC118568295							LOC118568295	-1.11366	0.91526	9.75488	0.00178847	0.00658644	LOC118568295
	LOC118568309	-1.01596	3.05534	27.1263	1.90586e-07	1.05526e-06	LOC118568309							LOC118568309	-1.14706	2.59603	20.5459	5.82188e-06	4.11252e-05	LOC118568309
	LOC118568485	-2.10378	0.882787	35.3418	2.76627e-09	1.91051e-08	LOC118568485							LOC118568485	-2.37532	0.526352	27.5306	1.54629e-07	1.47528e-06	LOC118568485
	LOC118568492	-2.73957	0.684027	58.4337	2.10261e-14	2.42101e-13	LOC118568492							LOC118568492	-2.70944	0.669266	32.9858	9.28343e-09	1.07138e-07	LOC118568492
	LOC118568498	-1.56241	4.00225	119.599	7.74373e-28	2.04005e-26	LOC118568498							LOC118568498	-1.47564	3.76762	32.4991	1.19249e-08	1.35522e-07	LOC118568498
	LOC118568508	1.84956	0.190539	16.8103	4.13081e-05	0.000160027	LOC118568508							LOC118568508	2.04529	-0.164972	23.4592	1.27592e-06	1.02924e-05	LOC118568508
	LOC118568587	-1.40431	1.81542	26.5782	2.53081e-07	1.36976e-06	LOC118568587							LOC118568587	-1.71884	1.35635	20.7226	5.30858e-06	3.79541e-05	LOC118568587
	LOC118568604	2.07735	0.014503	21.5635	3.42305e-06	1.58562e-05	LOC118568604							LOC118568604	1.71692	-0.0999097	13.3993	0.000251723	0.00119009	LOC118568604
	LOC118568626	2.34783	3.63383	212.38	4.15614e-48	2.55029e-46	LOC118568626							LOC118568626	2.37989	3.48664	84.2186	4.42991e-20	2.03503e-18	LOC118568626
	LOC118568655	-1.62366	4.61548	168.254	1.78061e-38	7.6295e-37	LOC118568655							LOC118568655	-1.69514	4.21831	63.9019	1.30771e-15	3.80716e-14	LOC118568655
	LOC118568759	1.69311	1.7289	27.3714	1.679e-07	9.38715e-07	LOC118568759							LOC118568759	1.93761	1.92747	34.826	3.60521e-09	4.46283e-08	LOC118568759
	LOC118568792	2.73266	1.17144	73.3978	1.05983e-17	1.51516e-16	LOC118568792							LOC118568792	3.08985	1.27558	50.2486	1.35452e-12	2.73007e-11	LOC118568792
	LOC68395	2.8534	2.27521	101.198	8.32399e-24	1.75557e-22	LOC68395							LOC68395	2.57439	2.75068	46.3432	9.92495e-12	1.79118e-10	LOC68395
	Lox	5.15465	5.46094	919.127	6.82181e-202	3.76741e-199	Lox							Lox	5.1874	5.60564	290.262	4.35975e-65	1.98987e-62	Lox
	Lpar6	-1.29698	7.53125	183.162	9.88601e-42	4.81733e-40	Lpar6							Lpar6	-1.33988	7.43955	131.449	1.97476e-30	2.14929e-28	Lpar6
	Lpl	4.97017	8.87249	1038.31	8.44671e-228	7.40876e-225	Lpl							Lpl	3.31693	8.7934	51.106	8.75104e-13	1.82086e-11	Lpl
	Lrba	-1.32643	7.22885	201.896	8.05655e-46	4.56537e-44	Lrba							Lrba	-1.48658	7.20204	127.235	1.64997e-29	1.6917e-27	Lrba
	Lrfn4	2.16627	2.2908	86.6033	1.32625e-20	2.26267e-19	Lrfn4							Lrfn4	2.1914	2.31529	50.3008	1.31898e-12	2.67422e-11	Lrfn4
	Lrguk	1.07548	5.27725	31.0326	2.53736e-08	1.5699e-07	Lrguk							Lrguk	1.579	5.44012	91.777	9.70168e-22	5.14116e-20	Lrguk
	Lrpap1	1.74306	7.74036	305.54	2.04607e-68	2.19489e-66	Lrpap1							Lrpap1	1.63191	7.79599	86.0209	1.78047e-20	8.39729e-19	Lrpap1
	Lrrc14b	1.32087	1.4001	23.4655	1.27174e-06	6.2708e-06	Lrrc14b							Lrrc14b	1.80792	1.39081	27.4232	1.6346e-07	1.55221e-06	Lrrc14b
	Lrrc27	2.12511	2.6236	97.3097	5.92886e-23	1.19305e-21	Lrrc27							Lrrc27	2.64546	2.56975	69.8637	6.35486e-17	2.17712e-15	Lrrc27
	Lrrc70	-1.40314	2.32254	48.846	2.76868e-12	2.61124e-11	Lrrc70							Lrrc70	-1.67484	2.22831	30.8253	2.82338e-08	3.02866e-07	Lrrc70
	Lrrc8c	1.43588	2.68849	51.0604	8.95658e-13	8.89158e-12	Lrrc8c							Lrrc8c	1.11511	2.71529	13.3166	0.000263069	0.00123578	Lrrc8c
	Lst1	-1.55191	4.48274	223.544	1.52516e-50	9.97441e-49	Lst1							Lst1	-1.41752	4.42194	87.1227	1.01991e-20	4.89177e-19	Lst1
	Ltb	-1.66717	2.84316	89.172	3.61941e-21	6.42488e-20	Ltb							Ltb	-2.0406	2.84505	52.4743	4.35906e-13	9.45956e-12	Ltb
	Ltb4r1	-1.66534	0.47574	18.4256	1.76666e-05	7.30472e-05	Ltb4r1							Ltb4r1	-2.21638	0.4808	18.703	1.52743e-05	9.85035e-05	Ltb4r1
	Ltc4s	-1.00527	7.48663	136.744	1.3721e-31	4.39041e-30	Ltc4s							Ltc4s	-1.05082	7.35036	84.3093	4.23118e-20	1.95006e-18	Ltc4s
	Ly6c2	1.34592	1.85646	7.46018	0.00630786	0.0150635	Ly6c2							Ly6c2	1.43496	2.07432	6.72304	0.00951751	0.0274284	Ly6c2
	Ly6g6e	-1.52696	0.690578	23.231	1.43662e-06	7.03034e-06	Ly6g6e							Ly6g6e	-1.26102	0.384567	10.6242	0.00111619	0.00437528	Ly6g6e
	Ly9	1.72135	7.08402	225.397	6.01622e-51	3.96937e-49	Ly9							Ly9	1.87272	7.20032	226.867	2.87557e-51	9.46197e-49	Ly9
	Lypd6	-1.17121	3.20524	46.8506	7.66092e-12	6.91896e-11	Lypd6							Lypd6	-1.52145	3.09397	43.0059	5.45752e-11	8.93732e-10	Lypd6
	Lyve1	-1.77862	2.63688	51.2117	8.29232e-13	8.25964e-12	Lyve1							Lyve1	-1.24903	2.69578	19.3445	1.09131e-05	7.24248e-05	Lyve1
	Lyz2	2.0458	10.0761	226.485	3.48364e-51	2.31895e-49	Lyz2							Lyz2	1.07239	10.3536	5.74297	0.0165548	0.043554	Lyz2
	Maf	-1.11187	8.87436	160.902	7.18802e-37	2.92045e-35	Maf							Maf	-1.10196	8.8417	51.6117	6.76381e-13	1.42838e-11	Maf
	Maff	3.29554	4.03023	198.178	5.21716e-45	2.87059e-43	Maff							Maff	2.9921	4.00142	70.894	3.76939e-17	1.31687e-15	Maff
	Magef1	-1.06309	3.82973	47.9033	4.47761e-12	4.1341e-11	Magef1							Magef1	-1.31488	3.44359	33.1969	8.32833e-09	9.72257e-08	Magef1
	Mamdc2	9.66633	7.01681	2241.3	0	0	Mamdc2							Mamdc2	6.14234	7.19002	31.4698	2.02567e-08	2.21836e-07	Mamdc2
	Mansc1	1.20087	1.86156	20.6454	5.5271e-06	2.48986e-05	Mansc1							Mansc1	1.12936	1.88513	12.9223	0.00032469	0.00148819	Mansc1
	Mapk12	-1.80958	2.10755	60.0602	9.19983e-15	1.09393e-13	Mapk12							Mapk12	-2.38312	1.88273	48.5439	3.22982e-12	6.18386e-11	Mapk12
	Marchf3	1.87263	2.86519	95.1241	1.7882e-22	3.49461e-21	Marchf3							Marchf3	1.55951	2.89426	44.2626	2.87144e-11	4.90676e-10	Marchf3
	Masp1	2.00655	5.22877	235.759	3.30661e-53	2.38188e-51	Masp1							Masp1	2.10123	5.33077	210.288	1.18874e-47	3.50407e-45	Masp1
	Mboat1	-1.744	2.75707	88.3976	5.35346e-21	9.3582e-20	Mboat1							Mboat1	-1.84326	2.51537	44.2372	2.90894e-11	4.96484e-10	Mboat1
	Mcam	1.86192	3.25717	12.7564	0.000354788	0.00114285	Mcam							Mcam	1.46618	3.20354	10.3247	0.00131259	0.00503438	Mcam
	Mcoln2	3.89789	0.923279	87.3927	8.8977e-21	1.5338e-19	Mcoln2							Mcoln2	2.36488	0.848853	9.11589	0.00253399	0.0089477	Mcoln2
	Mcoln3	6.99874	2.25116	248.463	5.61835e-56	4.52839e-54	Mcoln3							Mcoln3	5.27075	2.42831	56.5162	5.57382e-14	1.34122e-12	Mcoln3
	Mdfi	-1.11929	4.71052	122.144	2.14647e-28	5.82988e-27	Mdfi							Mdfi	-1.0426	4.47644	47.1396	6.61053e-12	1.22105e-10	Mdfi
	Mdfic	1.73588	4.51703	193.109	6.66422e-44	3.51131e-42	Mdfic							Mdfic	1.41878	4.6388	44.7694	2.21662e-11	3.82475e-10	Mdfic
	Megf9	1.75523	3.30344	80.934	2.33381e-19	3.73785e-18	Megf9							Megf9	1.60208	3.40738	61.8323	3.73988e-15	1.03553e-13	Megf9
	Mfap3l	1.36791	3.02923	73.5435	9.84444e-18	1.41009e-16	Mfap3l							Mfap3l	1.0812	2.94451	20.644	5.53105e-06	3.92668e-05	Mfap3l
	Mfsd12	1.42117	6.59903	241.636	1.72968e-54	1.3092e-52	Mfsd12							Mfsd12	1.26051	6.57904	79.7576	4.23287e-19	1.76149e-17	Mfsd12
	Mgl2	-1.55873	3.44051	57.9404	2.70184e-14	3.07535e-13	Mgl2							Mgl2	-2.3511	3.87608	66.2637	3.94452e-16	1.23476e-14	Mgl2
	Mgst3	1.47084	3.35529	70.3232	5.0342e-17	6.91206e-16	Mgst3							Mgst3	1.09977	3.2797	21.7977	3.02965e-06	2.25851e-05	Mgst3
	Mical1	1.24784	6.20509	147.144	7.29758e-34	2.61573e-32	Mical1							Mical1	1.10908	6.16549	73.0152	1.28656e-17	4.69164e-16	Mical1
	Mif	2.55716	6.37104	459.118	7.48023e-102	1.50727e-99	Mif							Mif	2.19459	6.46966	105.203	1.10236e-24	8.12356e-23	Mif
	Milr1	1.58663	5.14161	187.918	9.05313e-43	4.54516e-41	Milr1							Milr1	1.49902	5.11114	79.9876	3.76769e-19	1.57254e-17	Milr1
	Minar1	4.67742	5.25249	940.078	1.90333e-206	1.35146e-203	Minar1							Minar1	4.51315	5.2686	392.889	1.94541e-87	1.83504e-84	Minar1
	Mir17hg	-1.11038	2.97363	35.4515	2.61477e-09	1.81007e-08	Mir17hg							Mir17hg	-1.43503	2.42685	26.55	2.5681e-07	2.35033e-06	Mir17hg
	Mir7115	-1.05852	3.58341	20.8428	4.98574e-06	2.25965e-05	Mir7115							Mir7115	-1.13347	3.36988	19.7145	8.99177e-06	6.0743e-05	Mir7115
	Mmp11	-1.24591	2.05518	31.6235	1.87148e-08	1.17895e-07	Mmp11							Mmp11	-1.74859	1.76018	31.0209	2.5526e-08	2.757e-07	Mmp11
	Mmp12	1.80856	2.60075	40.5781	1.8891e-10	1.49593e-09	Mmp12							Mmp12	-4.04312	5.99471	12.2814	0.000457496	0.00199973	Mmp12
	Mmp15	-1.88254	2.01432	37.7897	7.87971e-10	5.78505e-09	Mmp15							Mmp15	-2.03734	1.9887	36.8484	1.27683e-09	1.69632e-08	Mmp15
	Mmp28	-2.36311	3.22338	223.913	1.26751e-50	8.32593e-49	Mmp28							Mmp28	-2.04244	2.95796	35.1402	3.06807e-09	3.83821e-08	Mmp28
	Mndal	-1.07654	2.74427	23.5892	1.19253e-06	5.89973e-06	Mndal							Mndal	-1.15044	2.90086	11.9886	0.000535266	0.00229848	Mndal
	Mocos	2.60695	2.39559	152.154	5.86408e-35	2.16434e-33	Mocos							Mocos	1.92603	2.77041	15.8467	6.8686e-05	0.000376535	Mocos
	Mpeg1	1.08971	11.9087	110.899	6.2252e-26	1.48044e-24	Mpeg1							Mpeg1	1.24572	12.027	20.2492	6.79834e-06	4.72213e-05	Mpeg1
	Mpi	-1.21579	5.63445	175.539	4.56494e-40	2.07524e-38	Mpi							Mpi	-1.09403	5.5109	56.1764	6.62509e-14	1.57016e-12	Mpi
	Mrc1	-1.09326	6.2561	35.5532	2.48178e-09	1.7216e-08	Mrc1							Mrc1	-1.14044	6.50056	30.6598	3.0747e-08	3.28084e-07	Mrc1
	Mrc2	1.63477	8.36511	306.159	1.49924e-68	1.61993e-66	Mrc2							Mrc2	1.63589	8.39342	141.923	1.01092e-32	1.26579e-30	Mrc2
	Mrgpre	2.21322	4.48248	242.438	1.15649e-54	8.88884e-53	Mrgpre							Mrgpre	2.39733	4.63983	239.151	6.02251e-54	2.13031e-51	Mrgpre
	Mrvi1	-1.34371	0.775823	5.94395	0.0147679	0.0320157	Mrvi1							Mrvi1	-1.70576	0.583043	13.3751	0.00025499	0.00120262	Mrvi1
	Ms4a4a	-1.19683	2.0379	18.1614	2.02947e-05	8.27944e-05	Ms4a4a							Ms4a4a	-1.2646	2.21536	14.8045	0.000119249	0.000615562	Ms4a4a
	Ms4a6b	-1.2018	5.46212	132.241	1.32519e-30	4.02441e-29	Ms4a6b							Ms4a6b	-1.16043	5.4539	68.151	1.51441e-16	4.99474e-15	Ms4a6b
	Mt1	1.57381	5.79659	220.591	6.72144e-50	4.33867e-48	Mt1							Mt1	1.41569	5.7024	67.5152	2.09072e-16	6.75377e-15	Mt1
	Mt2	2.60899	2.52537	116.519	3.6582e-27	9.26102e-26	Mt2							Mt2	1.46364	2.51116	14.2343	0.000161402	0.00080553	Mt2
	Mtss1	-1.62331	5.81513	338.202	1.57209e-75	2.05627e-73	Mtss1							Mtss1	-1.75833	5.83495	130.602	3.02572e-30	3.19484e-28	Mtss1
	Mtss2	2.29767	3.37384	50.8783	9.8276e-13	9.72392e-12	Mtss2							Mtss2	1.2347	2.88077	17.5422	2.81e-05	0.000170638	Mtss2
	Mx1	1.23253	4.99733	18.8061	1.44704e-05	6.06943e-05	Mx1							Mx1	1.49149	5.00302	49.9405	1.58476e-12	3.17604e-11	Mx1
	Myb	-1.03944	0.537768	9.49116	0.00206464	0.00559234	Myb							Myb	-1.81184	0.0965143	19.7347	8.89724e-06	6.0233e-05	Myb
	Mycl	-2.43587	3.39139	233.301	1.1365e-52	8.03146e-51	Mycl							Mycl	-2.46515	3.38874	131.91	1.56566e-30	1.71725e-28	Mycl
	Myh10	1.42668	5.19156	118.713	1.21029e-27	3.14951e-26	Myh10							Myh10	1.56292	5.29013	93.1896	4.75169e-22	2.59582e-20	Myh10
	Myl2	-1.04606	3.01707	34.7589	3.73168e-09	2.54776e-08	Myl2							Myl2	-1.21569	2.92917	29.691	5.06694e-08	5.21904e-07	Myl2
	Mymk	-1.50828	3.73701	93.8956	3.32611e-22	6.38296e-21	Mymk							Mymk	-1.31433	3.73574	54.2297	1.78371e-13	4.03158e-12	Mymk
	Myo18b	-1.41867	6.37474	170.98	4.51982e-39	1.96487e-37	Myo18b							Myo18b	-1.44207	6.27225	36.3251	1.67001e-09	2.18584e-08	Myo18b
	Myo1e	3.52355	7.56405	713.641	3.23206e-157	1.12077e-154	Myo1e							Myo1e	3.57311	7.73601	239.859	4.22043e-54	1.53115e-51	Myo1e
	Myo1g	-1.0558	5.90174	126.186	2.8001e-29	8.07589e-28	Myo1g							Myo1g	-1.09146	5.89802	41.4968	1.18067e-10	1.83373e-09	Myo1g
	Myo5a	2.79417	7.27671	777.152	5.00904e-171	1.91512e-168	Myo5a							Myo5a	2.57149	7.36626	224.932	7.59855e-51	2.44345e-48	Myo5a
	Naglu	1.23985	8.3251	145.442	1.71919e-33	6.0746e-32	Naglu							Naglu	1.22023	8.31182	82.9027	8.61953e-20	3.83515e-18	Naglu
	Nap1l1	1.30136	6.43155	152.303	5.439e-35	2.01243e-33	Nap1l1							Nap1l1	1.17918	6.54584	58.6598	1.87431e-14	4.74411e-13	Nap1l1
	Napsa	-1.54205	1.09856	17.9293	2.29265e-05	9.2997e-05	Napsa							Napsa	-2.28106	1.25384	19.8323	8.45434e-06	5.75099e-05	Napsa
	Nat8l	1.31948	5.74328	226.228	3.96262e-51	2.62607e-49	Nat8l							Nat8l	1.47671	5.60437	113.937	1.34518e-26	1.1397e-24	Nat8l
	Nbeal2	-1.03069	7.33667	103.716	2.33521e-24	5.09814e-23	Nbeal2							Nbeal2	-1.02395	7.21776	49.3883	2.09993e-12	4.12093e-11	Nbeal2
	Nbl1	2.45098	4.91584	274.742	1.05084e-61	9.73232e-60	Nbl1							Nbl1	2.6296	4.96269	233.399	1.08167e-52	3.73283e-50	Nbl1
	Ncaph	-1.31614	4.09709	109.766	1.10257e-25	2.57284e-24	Ncaph							Ncaph	-1.52942	4.07387	75.8834	3.00915e-18	1.15383e-16	Ncaph
	Nceh1	3.24614	6.77201	751.464	1.92818e-165	7.18778e-163	Nceh1							Nceh1	2.92927	6.90524	178.89	8.46869e-41	1.73657e-38	Nceh1
	Ncs1	-1.08443	4.33766	93.6879	3.69407e-22	7.04378e-21	Ncs1							Ncs1	-1.32125	4.26875	48.618	3.11004e-12	5.97068e-11	Ncs1
	Ndrg2	2.67296	5.23027	86.9482	1.11401e-20	1.90712e-19	Ndrg2							Ndrg2	1.19771	4.84171	28.1526	1.1212e-07	1.09406e-06	Ndrg2
	Ndufa1	2.18579	4.48531	161.275	5.9577e-37	2.43384e-35	Ndufa1							Ndufa1	1.71825	4.44527	81.0435	2.20801e-19	9.4384e-18	Ndufa1
	Nenf	1.10872	4.92625	56.7877	4.85496e-14	5.38232e-13	Nenf							Nenf	1.02414	4.80147	33.1121	8.69971e-09	1.01061e-07	Nenf
	Nexn	2.52168	3.41461	197.146	8.76187e-45	4.71654e-43	Nexn							Nexn	2.73485	3.39662	104.637	1.46697e-24	1.05361e-22	Nexn
	Nfil3	1.5569	3.74336	69.9912	5.95703e-17	8.12675e-16	Nfil3							Nfil3	1.38022	3.96827	19.8355	8.43999e-06	5.74398e-05	Nfil3
	Nhs	-1.88328	1.48643	44.2711	2.85901e-11	2.45145e-10	Nhs							Nhs	-2.32447	1.29429	22.0184	2.7005e-06	2.04001e-05	Nhs
	Nhsl2	-1.41261	4.96732	78.3905	8.45577e-19	1.30118e-17	Nhsl2							Nhsl2	-1.58412	4.87659	98.7517	2.8623e-23	1.76081e-21	Nhsl2
	Nim1k	2.00203	0.809392	29.8862	4.58162e-08	2.74584e-07	Nim1k							Nim1k	1.77358	0.791309	21.0545	4.46412e-06	3.2358e-05	Nim1k
	Nlrc3	1.90419	2.89692	110.253	8.62411e-26	2.01874e-24	Nlrc3							Nlrc3	1.99118	2.71002	49.4738	2.01043e-12	3.95627e-11	Nlrc3
	Nlrc4	-1.40482	0.902907	16.9167	3.90576e-05	0.00015198	Nlrc4							Nlrc4	-1.46824	1.03754	16.6469	4.50237e-05	0.000260457	Nlrc4
	Nlrc5	1.7195	5.76567	76.767	1.92363e-18	2.87984e-17	Nlrc5							Nlrc5	2.17326	6.00922	91.043	1.40584e-21	7.39449e-20	Nlrc5
	Nlrp1b	-1.15048	7.31606	91.5612	1.08191e-21	1.98675e-20	Nlrp1b							Nlrp1b	-1.11386	7.19901	27.8888	1.28495e-07	1.241e-06	Nlrp1b
	Nme2	1.23578	6.09767	137.216	1.08142e-31	3.48273e-30	Nme2							Nme2	1.06878	6.07456	48.7348	2.9302e-12	5.66385e-11	Nme2
	Npas4	3.98356	1.90382	87.8571	7.03581e-21	1.22082e-19	Npas4							Npas4	3.40384	1.29639	45.4064	1.60112e-11	2.81069e-10	Npas4
	Npc2	1.46039	9.81055	172.749	1.85735e-39	8.16959e-38	Npc2							Npc2	1.4411	9.84653	53.6177	2.43554e-13	5.4354e-12	Npc2
	Npm1	1.14143	7.46331	93.5055	4.05076e-22	7.69438e-21	Npm1							Npm1	1.15317	7.54636	76.6657	2.02487e-18	7.91432e-17	Npm1
	Nr4a3	1.25934	1.46489	10.027	0.00154261	0.00429701	Nr4a3							Nr4a3	1.3854	1.44045	8.60301	0.00335608	0.0113628	Nr4a3
	Nrap	1.50013	1.90764	23.047	1.58085e-06	7.68572e-06	Nrap							Nrap	1.38514	1.53763	17.0439	3.65248e-05	0.000216774	Nrap
	Nrarp	-1.90315	3.50807	116.129	4.45334e-27	1.12169e-25	Nrarp							Nrarp	-2.52551	3.406	140.95	1.64987e-32	1.99522e-30	Nrarp
	Nrm	-1.09035	5.41924	143.536	4.48714e-33	1.55962e-31	Nrm							Nrm	-1.2674	5.26873	109.018	1.60841e-25	1.24357e-23	Nrm
	Nrp1	1.4623	8.60954	227.493	2.09967e-51	1.41028e-49	Nrp1							Nrp1	1.37647	8.65431	80.9066	2.36647e-19	1.00853e-17	Nrp1
	Nrp2	1.18894	6.5378	154.304	1.98764e-35	7.57998e-34	Nrp2							Nrp2	1.04341	6.56216	47.0676	6.85783e-12	1.26508e-10	Nrp2
	Nsa2	1.2498	6.40939	118.668	1.23781e-27	3.20992e-26	Nsa2							Nsa2	1.18646	6.43215	70.4333	4.76101e-17	1.65512e-15	Nsa2
	Nsa2-ps1	1.29741	2.19467	34.5056	4.25025e-09	2.87548e-08	Nsa2-ps1							Nsa2-ps1	1.23464	2.0791	16.8957	3.94909e-05	0.000232815	Nsa2-ps1
	Nsg2	-1.00621	1.73937	6.31481	0.0119734	0.0266152	Nsg2							Nsg2	-1.74329	1.64498	12.8788	0.000332324	0.00151973	Nsg2
	Ntn3	1.89598	0.151821	25.5859	4.23114e-07	2.22542e-06	Ntn3							Ntn3	2.06802	0.0164898	24.7586	6.49772e-07	5.53499e-06	Ntn3
	Nup210l	-1.20648	2.25433	25.5967	4.20757e-07	2.2138e-06	Nup210l							Nup210l	-1.09907	2.13731	12.3845	0.000432915	0.00190998	Nup210l
	Oas1a	2.23517	5.14241	116.933	2.96981e-27	7.55679e-26	Oas1a							Oas1a	2.42254	5.4261	104.655	1.45386e-24	1.04952e-22	Oas1a
	Oas1g	2.783	3.33837	141.75	1.10312e-32	3.73831e-31	Oas1g							Oas1g	2.79867	3.55804	78.8782	6.60598e-19	2.70139e-17	Oas1g
	Oas2	1.17037	4.87345	18.571	1.63688e-05	6.81394e-05	Oas2							Oas2	1.48323	5.26388	35.6607	2.34856e-09	3.00179e-08	Oas2
	Oas3	2.3452	3.4957	62.817	2.26829e-15	2.8022e-14	Oas3							Oas3	2.80927	3.94152	67.3714	2.24883e-16	7.21512e-15	Oas3
	Oasl1	1.95301	2.60949	24.3282	8.1243e-07	4.12326e-06	Oasl1							Oasl1	1.84921	2.64103	23.6519	1.15434e-06	9.39742e-06	Oasl1
	Oasl2	2.60729	5.803	114.102	1.23764e-26	3.05032e-25	Oasl2							Oasl2	2.88785	6.07841	103.482	2.62835e-24	1.82297e-22	Oasl2
	Ogfod3	1.08213	3.78559	50.2093	1.38188e-12	1.34763e-11	Ogfod3							Ogfod3	1.32297	3.8214	45.5625	1.47844e-11	2.61155e-10	Ogfod3
	Olfm4	1.24263	3.82167	51.5043	7.1442e-13	7.14947e-12	Olfm4							Olfm4	1.01309	3.58102	20.1564	7.13611e-06	4.92771e-05	Olfm4
	Olfml2b	-1.04423	5.17024	76.8796	1.81708e-18	2.73406e-17	Olfml2b							Olfml2b	-1.09753	5.05394	53.5521	2.51821e-13	5.60221e-12	Olfml2b
	Olfr110	2.32868	3.49816	250.876	1.67302e-56	1.37825e-54	Olfr110							Olfr110	2.62941	3.5119	107.529	3.40826e-25	2.5515e-23	Olfr110
	Olfr111	2.18089	6.90868	276.48	4.39189e-62	4.14478e-60	Olfr111							Olfr111	2.36009	6.87194	92.7869	5.82398e-22	3.14517e-20	Olfr111
	Olfr112	4.11946	0.653668	95.9731	1.16454e-22	2.28781e-21	Olfr112							Olfr112	3.06324	0.471343	55.7343	8.29565e-14	1.94652e-12	Olfr112
	Olfr114	2.78706	-0.218646	27.5197	1.55506e-07	8.73679e-07	Olfr114							Olfr114	2.63344	-0.087714	28.5255	9.24721e-08	9.13041e-07	Olfr114
	Optn	2.18473	3.84669	237.432	1.42774e-53	1.05916e-51	Optn							Optn	1.8724	3.93718	99.3229	2.14508e-23	1.33117e-21	Optn
	Osbpl3	1.206	4.50495	112.991	2.16782e-26	5.256e-25	Osbpl3							Osbpl3	1.55487	4.5866	124.477	6.62546e-29	6.37712e-27	Osbpl3
	Osbpl6	-1.02916	1.66413	15.4688	8.38767e-05	0.000306035	Osbpl6							Osbpl6	-1.22851	1.39614	9.27022	0.0023291	0.00831134	Osbpl6
	Osm	1.16852	5.47066	46.5385	8.98353e-12	8.06948e-11	Osm							Osm	1.19991	5.53065	26.1624	3.13876e-07	2.82868e-06	Osm
	Otulinl	-1.0436	8.41855	155.657	1.00625e-35	3.94846e-34	Otulinl							Otulinl	-1.04648	8.36822	51.9338	5.74028e-13	1.23059e-11	Otulinl
	Ovgp1	-1.06882	0.898985	10.7727	0.00103006	0.00299809	Ovgp1							Ovgp1	-1.69086	1.02926	19.2421	1.15148e-05	7.59904e-05	Ovgp1
	P2rx1	-1.91666	3.48133	153.572	2.87189e-35	1.08687e-33	P2rx1							P2rx1	-2.18573	3.48582	78.6037	7.59066e-19	3.08622e-17	P2rx1
	P2ry12	-1.06967	11.3357	135.063	3.19847e-31	9.99841e-30	P2ry12							P2ry12	-1.01526	11.2991	16.0678	6.11158e-05	0.000339775	P2ry12
	P3h3	1.04101	6.07145	154.749	1.58861e-35	6.12087e-34	P3h3							P3h3	1.10952	6.00232	72.0651	2.08217e-17	7.43957e-16	P3h3
	P3h4	1.24033	3.183	45.4229	1.58767e-11	1.39257e-10	P3h4							P3h4	1.37358	3.12691	30.9204	2.68825e-08	2.89909e-07	P3h4
	Pabpc1	1.13353	9.29735	136.541	1.51932e-31	4.84073e-30	Pabpc1							Pabpc1	1.11498	9.35989	39.7257	2.92261e-10	4.30749e-09	Pabpc1
	Pacsin1	3.09011	4.99935	410.787	2.4707e-91	4.1394e-89	Pacsin1							Pacsin1	3.31804	4.98913	316.808	7.17972e-71	4.23274e-68	Pacsin1
	Paqr8	1.43254	3.07465	29.5125	5.55573e-08	3.28476e-07	Paqr8							Paqr8	1.13234	2.79603	19.1468	1.21039e-05	7.97289e-05	Paqr8
	Patl2	-1.33869	0.337559	10.2745	0.00134878	0.00381263	Patl2							Patl2	-1.59205	-0.10813	12.4781	0.000411743	0.00182683	Patl2
	Pcdhb22	1.74782	3.27382	102.815	3.68003e-24	7.94108e-23	Pcdhb22							Pcdhb22	1.56891	3.26785	58.0442	2.56288e-14	6.39546e-13	Pcdhb22
	Pcdhga4	1.13543	2.9962	31.0832	2.47197e-08	1.53199e-07	Pcdhga4							Pcdhga4	1.44974	3.0058	42.9175	5.70968e-11	9.29647e-10	Pcdhga4
	Pcdhgb1	1.45092	1.42607	26.7012	2.37477e-07	1.29376e-06	Pcdhgb1							Pcdhgb1	1.35245	1.61102	17.4211	2.99478e-05	0.000180445	Pcdhgb1
	Pcnx2	-1.84529	3.93429	119.867	6.76399e-28	1.79144e-26	Pcnx2							Pcnx2	-1.74098	3.65793	68.076	1.57313e-16	5.15235e-15	Pcnx2
	Pcolce	-1.01523	2.70222	23.1789	1.4761e-06	7.20934e-06	Pcolce							Pcolce	-1.59188	2.52285	30.2973	3.70637e-08	3.9077e-07	Pcolce
	Pdcd1	3.5046	5.5693	422.883	5.7531e-94	1.02124e-91	Pdcd1							Pdcd1	3.17135	5.50537	142.226	8.67839e-33	1.10622e-30	Pdcd1
	Pde1b	-1.34542	6.85055	107.031	4.38221e-25	9.97606e-24	Pde1b							Pde1b	-1.49008	6.63675	72.3368	1.81436e-17	6.56558e-16	Pde1b
	Pde2a	-1.10586	7.23174	70.9256	3.70962e-17	5.13594e-16	Pde2a							Pde2a	-1.08289	7.154	40.2115	2.27906e-10	3.42318e-09	Pde2a
	Pdgfc	2.23852	2.4356	81.3609	1.88042e-19	3.02825e-18	Pdgfc							Pdgfc	2.38566	2.44724	52.5727	4.14608e-13	9.02505e-12	Pdgfc
	Pdgfrb	-1.0641	1.65156	8.26392	0.00404407	0.010174	Pdgfrb							Pdgfrb	-1.56662	1.58348	13.6665	0.000218318	0.00104676	Pdgfrb
	Pdlim4	-1.65331	5.37827	314.121	2.76386e-70	3.14594e-68	Pdlim4							Pdlim4	-1.56025	5.26369	119.744	7.19871e-28	6.65716e-26	Pdlim4
	Pdzk1ip1	1.62982	0.751532	22.0566	2.64724e-06	1.24875e-05	Pdzk1ip1							Pdzk1ip1	2.06882	0.454097	28.909	7.58614e-08	7.6071e-07	Pdzk1ip1
	Pdzrn3	1.50756	0.302898	12.2876	0.000455966	0.00143862	Pdzrn3							Pdzrn3	1.8435	0.223985	13.7547	0.000208303	0.00100464	Pdzrn3
	Pdzrn4	-1.79029	0.232159	17.6256	2.68949e-05	0.000107285	Pdzrn4							Pdzrn4	-3.45673	-0.315414	39.5611	3.17946e-10	4.65695e-09	Pdzrn4
	Pea15a	1.40396	8.47281	196.513	1.2047e-44	6.43848e-43	Pea15a							Pea15a	1.24132	8.44778	72.3204	1.82949e-17	6.60345e-16	Pea15a
	Pebp1	1.72128	6.27946	330.241	8.51796e-74	1.08557e-71	Pebp1							Pebp1	1.52946	6.45034	77.5699	1.28109e-18	5.07737e-17	Pebp1
	Pecam1	-1.79168	5.00847	137.292	1.04082e-31	3.37384e-30	Pecam1							Pecam1	-1.94658	4.89628	139.003	4.39852e-32	5.18622e-30	Pecam1
	Perp	1.94021	3.25996	102.691	3.91708e-24	8.42821e-23	Perp							Perp	1.36303	3.21128	22.9401	1.67126e-06	1.31414e-05	Perp
	Pfdn5	1.18876	6.76724	94.0941	3.00878e-22	5.78889e-21	Pfdn5							Pfdn5	1.0634	6.75258	59.6268	1.14663e-14	2.99329e-13	Pfdn5
	Pgam1	1.48228	6.70398	179.078	7.70258e-41	3.60041e-39	Pgam1							Pgam1	1.17188	6.89988	38.453	5.60884e-10	7.92011e-09	Pgam1
	Pgam1-ps2	1.3308	0.441117	14.4413	0.000144596	0.000506061	Pgam1-ps2							Pgam1-ps2	1.01565	0.799963	5.7687	0.0163141	0.0429848	Pgam1-ps2
	Pgk1	2.02146	7.11796	266.796	5.66411e-60	5.05734e-58	Pgk1							Pgk1	1.54026	7.3307	48.214	3.82154e-12	7.23842e-11	Pgk1
	Phf11a	1.90351	2.1845	30.6155	3.14565e-08	1.92233e-07	Phf11a							Phf11a	1.71616	2.41634	26.1019	3.23871e-07	2.91319e-06	Phf11a
	Phf11b	1.33671	5.04132	70.4486	4.72417e-17	6.51036e-16	Phf11b							Phf11b	1.35976	5.08694	67.2695	2.36817e-16	7.58081e-15	Phf11b
	Phf24	-1.73129	2.18614	26.5715	2.53967e-07	1.37405e-06	Phf24							Phf24	-2.36629	1.89245	26.9012	2.14128e-07	1.98799e-06	Phf24
	Phlda1	2.55259	2.93548	112.487	2.79459e-26	6.74275e-25	Phlda1							Phlda1	2.31145	2.79961	25.7035	3.98101e-07	3.52046e-06	Phlda1
	Phlda3	3.96067	2.69741	166.765	3.76474e-38	1.58576e-36	Phlda3							Phlda3	3.13828	2.68139	63.5355	1.57504e-15	4.53875e-14	Phlda3
	Phyhd1	-1.15691	8.93464	153.453	3.05054e-35	1.15156e-33	Phyhd1							Phyhd1	-1.23878	8.7496	64.0651	1.20377e-15	3.52632e-14	Phyhd1
	Pianp	6.0394	5.67564	788.031	2.15954e-173	8.94468e-171	Pianp							Pianp	6.13756	5.67596	357.323	1.07759e-79	8.47049e-77	Pianp
	Pkd2l2	-1.53931	1.05601	24.9748	5.80851e-07	2.99691e-06	Pkd2l2							Pkd2l2	-1.30182	0.908673	12.1249	0.000497539	0.00215502	Pkd2l2
	Pkm	1.9203	9.36743	327.146	4.02259e-73	4.9984e-71	Pkm							Pkm	1.66778	9.56959	50.5551	1.15864e-12	2.3656e-11	Pkm
	Pkp2	4.32908	1.14367	104.214	1.81645e-24	4.00076e-23	Pkp2							Pkp2	3.1794	1.02296	27.194	1.84031e-07	1.73013e-06	Pkp2
	Plau	2.27654	8.20613	247.514	9.04679e-56	7.21373e-54	Plau							Plau	2.09346	8.20775	97.479	5.44297e-23	3.29113e-21	Plau
	Plaur	2.17221	5.72129	189.679	3.7366e-43	1.9081e-41	Plaur							Plaur	1.53485	5.60452	41.6385	1.09809e-10	1.71678e-09	Plaur
	Plbd1	-1.22287	2.77005	30.1286	4.04315e-08	2.4375e-07	Plbd1							Plbd1	-1.91791	3.26344	19.1072	1.23576e-05	8.11737e-05	Plbd1
	Plbd2	1.15282	7.37927	191.1	1.82919e-43	9.53671e-42	Plbd2							Plbd2	1.28886	7.43061	99.399	2.06432e-23	1.29438e-21	Plbd2
	Pld3	1.98559	8.81268	395.63	4.92375e-88	7.81042e-86	Pld3							Pld3	2.0437	8.87939	115.135	7.35329e-27	6.26757e-25	Pld3
	Plek	1.20397	9.80347	148.47	3.74377e-34	1.35166e-32	Plek							Plek	1.16699	9.85033	34.8661	3.53169e-09	4.37948e-08	Plek
	Plekha6	1.96004	2.39367	50.8586	9.92646e-13	9.81521e-12	Plekha6							Plekha6	1.99312	1.94024	25.3292	4.83341e-07	4.21627e-06	Plekha6
	Plekhb1	2.5921	3.24124	25.5022	4.41886e-07	2.31557e-06	Plekhb1							Plekhb1	1.47318	2.87265	15.0571	0.000104306	0.000548637	Plekhb1
	Plekhb2	1.06581	6.80477	145.59	1.59579e-33	5.66919e-32	Plekhb2							Plekhb2	1.01931	6.93175	72.2677	1.879e-17	6.76486e-16	Plekhb2
	Plekhh2	2.40501	5.30115	639.401	4.51055e-141	1.40118e-138	Plekhh2							Plekhh2	2.4243	5.33081	183.473	8.45712e-42	1.81303e-39	Plekhh2
	Plekhm2	1.20041	7.12614	152.417	5.13787e-35	1.91049e-33	Plekhm2							Plekhm2	1.37257	7.18632	181.221	2.62308e-41	5.45795e-39	Plekhm2
	Plvap	-1.28391	1.53835	20.0541	7.528e-06	3.31023e-05	Plvap							Plvap	-1.20718	1.2618	11.0504	0.00088667	0.00358545	Plvap
	Plxna1	-1.20255	3.63919	56.9368	4.5004e-14	5.00787e-13	Plxna1							Plxna1	-2.07947	4.09302	59.6763	1.11813e-14	2.92971e-13	Plxna1
	Plxna2	3.5379	3.15243	100.015	1.51225e-23	3.16258e-22	Plxna2							Plxna2	3.49844	3.10663	54.4657	1.58188e-13	3.59838e-12	Plxna2
	Plxnc1	2.34396	3.96488	228.028	1.60438e-51	1.09237e-49	Plxnc1							Plxnc1	1.83343	4.21519	20.2619	6.75326e-06	4.69311e-05	Plxnc1
	Pmaip1	1.37114	4.39158	91.6053	1.05807e-21	1.94777e-20	Pmaip1							Pmaip1	1.02597	4.45047	26.966	2.0707e-07	1.92752e-06	Pmaip1
	Pnp2	-1.29918	1.98358	32.2699	1.34178e-08	8.58313e-08	Pnp2							Pnp2	-1.22204	1.99976	14.9101	0.00011276	0.000586345	Pnp2
	Pnpla3	-1.74315	1.06533	27.6958	1.41969e-07	8.01246e-07	Pnpla3							Pnpla3	-2.02452	0.685963	28.215	1.08558e-07	1.06223e-06	Pnpla3
	Podxl2	-1.14297	1.19674	14.7812	0.000120734	0.000428125	Podxl2							Podxl2	-1.78115	1.0132	21.1207	4.31253e-06	3.13234e-05	Podxl2
	Pogk	1.06807	6.23349	125.937	3.17396e-29	9.11886e-28	Pogk							Pogk	1.10247	6.20827	62.0014	3.43217e-15	9.55942e-14	Pogk
	Postn	1.17642	3.84126	51.1776	8.43748e-13	8.39861e-12	Postn							Postn	1.12889	3.917	21.315	3.89678e-06	2.84938e-05	Postn
	Ppm1j	2.29095	2.34099	96.8672	7.41357e-23	1.47984e-21	Ppm1j							Ppm1j	2.16162	2.15244	49.6703	1.81878e-12	3.59413e-11	Ppm1j
	Ppp1r3c	4.56148	2.33428	236.452	2.33529e-53	1.71535e-51	Ppp1r3c							Ppp1r3c	4.02769	2.25879	83.2115	7.37289e-20	3.29082e-18	Ppp1r3c
	Ppp1r3e	1.76695	1.7715	47.4449	5.65709e-12	5.15919e-11	Ppp1r3e							Ppp1r3e	1.42971	1.73023	20.0677	7.47465e-06	5.14642e-05	Ppp1r3e
	Prdx4	1.79466	5.35845	259.437	2.27618e-58	1.92842e-56	Prdx4							Prdx4	1.57512	5.33863	137.802	8.05234e-32	9.41592e-30	Prdx4
	Prdx6	1.41635	5.21381	216.555	5.10276e-49	3.18357e-47	Prdx6							Prdx6	1.12552	5.27941	43.2344	4.85591e-11	8.01707e-10	Prdx6
	Prelid2	1.19435	2.08502	30.8952	2.72344e-08	1.67737e-07	Prelid2							Prelid2	1.29015	2.05147	16.6659	4.45741e-05	0.000258263	Prelid2
	Prickle1	1.45811	4.12657	167.809	2.22674e-38	9.48656e-37	Prickle1							Prickle1	1.32613	4.00044	46.5962	8.72304e-12	1.5864e-10	Prickle1
	Prkab1	-1.0512	6.73635	154.181	2.11442e-35	8.04289e-34	Prkab1							Prkab1	-1.20123	6.60291	111.363	4.92721e-26	4.02978e-24	Prkab1
	Prkca	-1.59351	5.81762	310.264	1.9131e-69	2.09752e-67	Prkca							Prkca	-1.44093	5.78049	92.9996	5.23051e-22	2.8464e-20	Prkca
	Prkg1	1.61047	3.3344	97.288	5.99412e-23	1.20456e-21	Prkg1							Prkg1	1.73726	3.30955	47.723	4.9091e-12	9.16343e-11	Prkg1
	Prnp	2.28243	4.14618	72.7342	1.4834e-17	2.08866e-16	Prnp							Prnp	1.6292	4.24942	43.2586	4.79632e-11	7.92794e-10	Prnp
	Prr15	1.95419	1.97566	73.1423	1.20629e-17	1.70979e-16	Prr15							Prr15	1.826	2.09351	33.8713	5.88811e-09	7.05426e-08	Prr15
	Prr5l	1.64129	4.28987	129.158	6.26137e-30	1.85245e-28	Prr5l							Prr5l	1.3956	4.43663	49.0019	2.55715e-12	4.9905e-11	Prr5l
	Prrg1	1.04619	0.0254697	6.59961	0.0102001	0.0230724	Prrg1							Prrg1	1.11939	0.208072	6.45254	0.0110794	0.03124	Prrg1
	Prrg3	3.95609	0.295282	55.2672	1.0521e-13	1.12862e-12	Prrg3							Prrg3	4.83371	0.451976	55.0304	1.18677e-13	2.74373e-12	Prrg3
	Psat1	2.65943	7.21679	810.767	2.46072e-178	1.07917e-175	Psat1							Psat1	2.70245	7.2866	294.365	5.56395e-66	2.71463e-63	Psat1
	Ptchd1	3.33711	6.57417	531.518	1.32021e-117	3.33654e-115	Ptchd1							Ptchd1	3.13608	6.45166	125.533	3.89133e-29	3.85024e-27	Ptchd1
	Ptger3	-2.94658	1.99147	133.909	5.71876e-31	1.76547e-29	Ptger3							Ptger3	-3.08893	1.77035	36.4474	1.56839e-09	2.06046e-08	Ptger3
	Ptger4	2.9268	4.36861	379.326	1.74462e-84	2.62768e-82	Ptger4							Ptger4	2.44657	4.26568	80.5152	2.88482e-19	1.2148e-17	Ptger4
	Ptk7	2.27742	1.37666	48.5147	3.27826e-12	3.07242e-11	Ptk7							Ptk7	2.26848	1.23249	31.9838	1.55467e-08	1.73068e-07	Ptk7
	Ptpn14	-1.38552	2.06488	19.0507	1.2729e-05	5.38142e-05	Ptpn14							Ptpn14	-1.41117	1.54887	19.1363	1.21707e-05	8.00946e-05	Ptpn14
	Ptprg	1.39532	3.05043	13.578	0.000228853	0.000768046	Ptprg							Ptprg	1.12657	2.71159	10.8196	0.00100429	0.00399147	Ptprg
	Ptprk	-1.07164	0.634293	5.50977	0.0189106	0.0397372	Ptprk							Ptprk	-1.39463	0.457242	8.22884	0.00412299	0.0135679	Ptprk
	Ptpru	2.04347	1.806	47.6889	4.99511e-12	4.58916e-11	Ptpru							Ptpru	1.86827	1.85102	27.3793	1.67209e-07	1.58356e-06	Ptpru
	Pwwp2b	1.23022	3.86746	78.5008	7.9967e-19	1.23692e-17	Pwwp2b							Pwwp2b	1.41362	4.04642	81.601	1.66529e-19	7.24991e-18	Pwwp2b
	Qpct	1.34679	2.16034	33.4184	7.43164e-09	4.90758e-08	Qpct							Qpct	1.28148	2.1198	14.381	0.000149301	0.000751498	Qpct
	Qprt	-1.5625	1.99937	47.8619	4.57332e-12	4.21724e-11	Qprt							Qprt	-1.7233	2.09859	33.0745	8.86927e-09	1.02813e-07	Qprt
	Qrich2	-1.12914	0.459119	10.9699	0.000926033	0.0027251	Qrich2							Qrich2	-1.4053	-0.0973971	9.62551	0.00191893	0.00700852	Qrich2
	Rab11fip4	2.70828	4.35133	502.901	2.22261e-111	4.87372e-109	Rab11fip4							Rab11fip4	2.53244	4.42695	172.783	1.82532e-39	3.31108e-37	Rab11fip4
	Rab3d	1.76194	3.61218	126.377	2.54244e-29	7.34696e-28	Rab3d							Rab3d	1.34897	3.71262	32.0111	1.53298e-08	1.70923e-07	Rab3d
	Rab7b	5.13413	5.87154	922.73	1.12384e-202	6.70301e-200	Rab7b							Rab7b	4.02604	5.87175	99.3067	2.16273e-23	1.33626e-21	Rab7b
	Rack1	1.23137	8.80477	127.462	1.47182e-29	4.30319e-28	Rack1							Rack1	1.10649	8.82824	45.1748	1.80213e-11	3.12479e-10	Rack1
	Rai14	3.24917	4.59798	542.869	4.48016e-120	1.17199e-117	Rai14							Rai14	2.6491	4.74137	64.9193	7.80297e-16	2.35404e-14	Rai14
	Ralgps1	-1.31636	5.84194	203.184	4.2171e-46	2.43725e-44	Ralgps1							Ralgps1	-1.32119	5.83685	66.5943	3.33557e-16	1.05111e-14	Ralgps1
	Ramp1	2.63449	6.09718	394.057	1.08314e-87	1.70008e-85	Ramp1							Ramp1	2.2596	5.98996	200.164	1.92286e-45	5.03826e-43	Ramp1
	Rap2b	2.22379	5.70999	327.618	3.17317e-73	4.00976e-71	Rap2b							Rap2b	2.09979	5.84762	120.941	3.93759e-28	3.6896e-26	Rap2b
	Rasgrp4	-1.69221	4.85507	261.73	7.20216e-59	6.20759e-57	Rasgrp4							Rasgrp4	-1.86715	4.76347	89.4796	3.09817e-21	1.57118e-19	Rasgrp4
	Rasl11a	2.67836	-0.043876	36.5177	1.51289e-09	1.07576e-08	Rasl11a							Rasl11a	2.52556	0.157972	21.7871	3.04638e-06	2.26859e-05	Rasl11a
	Rassf3	1.96518	6.53535	510.046	6.19742e-113	1.40015e-110	Rassf3							Rassf3	1.91502	6.72225	174.475	7.79406e-40	1.51066e-37	Rassf3
	Rell1	1.50053	4.78552	117.954	1.77452e-27	4.56205e-26	Rell1							Rell1	1.46475	4.85877	89.455	3.13695e-21	1.58517e-19	Rell1
	Reps2	1.68023	2.80885	61.7299	3.93944e-15	4.80302e-14	Reps2							Reps2	1.80611	2.98652	44.2747	2.85383e-11	4.88256e-10	Reps2
	Rftn1	2.36493	5.78598	578.644	7.3953e-128	2.04206e-125	Rftn1							Rftn1	2.25772	5.76009	132.088	1.43148e-30	1.58234e-28	Rftn1
	Rftn2	2.96911	2.59847	193.52	5.41949e-44	2.8758e-42	Rftn2							Rftn2	3.1443	2.6411	94.6955	2.22047e-22	1.26924e-20	Rftn2
	Rgs1	1.3644	5.797	31.2086	2.31736e-08	1.44336e-07	Rgs1							Rgs1	1.0248	6.13879	18.1959	1.99311e-05	0.000125058	Rgs1
	Rgs11	2.36488	4.04869	248.757	4.84682e-56	3.92777e-54	Rgs11							Rgs11	2.1311	3.81202	91.0308	1.41455e-21	7.41277e-20	Rgs11
	Rgs16	6.45412	4.5552	1337.21	9.27072e-293	1.72795e-289	Rgs16							Rgs16	6.43844	4.84152	205.866	1.0963e-46	3.04148e-44	Rgs16
	Rgs18	-1.79262	0.0778246	13.1203	0.000292113	0.000960673	Rgs18							Rgs18	-1.26079	0.42077	7.73768	0.00540804	0.0169852	Rgs18
	Rims2	1.89448	0.195169	19.3305	1.09936e-05	4.70512e-05	Rims2							Rims2	1.50452	-0.188748	8.66701	0.00324022	0.0110233	Rims2
	Ripk4	2.34602	-0.358681	21.3069	3.91323e-06	1.7976e-05	Ripk4							Ripk4	2.56068	-0.360494	24.5984	7.06112e-07	5.97893e-06	Ripk4
	Rnase10	-1.7384	0.232795	16.6081	4.59537e-05	0.00017683	Rnase10							Rnase10	-1.42545	0.372898	9.76914	0.00177465	0.00654236	Rnase10
	Rnd2	1.73281	2.19445	62.5082	2.65338e-15	3.2725e-14	Rnd2							Rnd2	1.04408	1.71947	11.4476	0.000715865	0.0029738	Rnd2
	Robo2	2.58416	0.729656	18.0014	2.20737e-05	8.97574e-05	Robo2							Robo2	3.60811	0.403452	51.6179	6.74248e-13	1.426e-11	Robo2
	Ropn1l	1.20244	1.18106	12.9234	0.000324504	0.00105395	Ropn1l							Ropn1l	1.4437	1.12923	18.4217	1.77031e-05	0.000112475	Ropn1l
	Rpl10	1.13835	9.36753	111.442	4.73376e-26	1.13299e-24	Rpl10							Rpl10	1.10936	9.43217	35.4325	2.64047e-09	3.35368e-08	Rpl10
	Rpl10a	1.15131	8.57534	118.682	1.22929e-27	3.19337e-26	Rpl10a							Rpl10a	1.10691	8.59275	56.0618	7.02296e-14	1.65613e-12	Rpl10a
	Rpl10a-ps1	1.39015	2.86455	56.6927	5.09528e-14	5.62783e-13	Rpl10a-ps1							Rpl10a-ps1	1.42949	2.9189	37.0295	1.16356e-09	1.55901e-08	Rpl10a-ps1
	Rpl10-ps1	1.36661	1.22793	25.4919	4.44238e-07	2.32504e-06	Rpl10-ps1							Rpl10-ps1	1.71253	1.05893	23.2764	1.40311e-06	1.12162e-05	Rpl10-ps1
	Rpl10-ps5	1.22331	1.185	21.1906	4.15796e-06	1.90533e-05	Rpl10-ps5							Rpl10-ps5	1.31392	1.31336	14.8807	0.000114531	0.000594458	Rpl10-ps5
	Rpl11	1.13627	8.10635	63.5187	1.58855e-15	1.98382e-14	Rpl11							Rpl11	1.06588	8.08224	40.6	1.86807e-10	2.83598e-09	Rpl11
	Rpl12	1.25469	8.38926	97.9521	4.28622e-23	8.71921e-22	Rpl12							Rpl12	1.09937	8.37766	41.9828	9.208e-11	1.45244e-09	Rpl12
	Rpl13	1.32538	9.09471	120.749	4.33693e-28	1.16729e-26	Rpl13							Rpl13	1.19128	9.08822	42.8755	5.83366e-11	9.47652e-10	Rpl13
	Rpl13a	1.18317	9.48136	70.4084	4.8214e-17	6.63822e-16	Rpl13a							Rpl13a	1.00718	9.45585	26.3092	2.90903e-07	2.64014e-06	Rpl13a
	Rpl14	1.30109	7.83175	119.953	6.47639e-28	1.71832e-26	Rpl14							Rpl14	1.251	7.83455	64.4001	1.01554e-15	3.01235e-14	Rpl14
	Rpl14-ps1	1.38436	6.16626	96.4861	8.9874e-23	1.7797e-21	Rpl14-ps1							Rpl14-ps1	1.1735	6.28697	61.3899	4.68216e-15	1.274e-13	Rpl14-ps1
	Rpl17	1.44038	6.4734	26.751	2.31437e-07	1.26409e-06	Rpl17							Rpl17	1.30284	6.42144	18.02	2.18593e-05	0.000135712	Rpl17
	Rpl17-ps10	1.15642	7.17075	39.693	2.97184e-10	2.30437e-09	Rpl17-ps10							Rpl17-ps10	1.09608	7.29383	38.2458	6.23697e-10	8.72867e-09	Rpl17-ps10
	Rpl17-ps3	1.18262	6.70265	72.1441	2.00043e-17	2.79817e-16	Rpl17-ps3							Rpl17-ps3	1.00909	6.65233	36.2807	1.70849e-09	2.23001e-08	Rpl17-ps3
	Rpl18a	1.29315	8.87097	97.603	5.11253e-23	1.03577e-21	Rpl18a							Rpl18a	1.17902	8.88077	40.4923	1.97395e-10	2.98711e-09	Rpl18a
	Rpl19	1.4985	8.67297	154.124	2.17536e-35	8.25362e-34	Rpl19							Rpl19	1.31872	8.68055	61.4319	4.58326e-15	1.2519e-13	Rpl19
	Rpl19-ps11	1.22331	3.50151	22.9206	1.68837e-06	8.18175e-06	Rpl19-ps11							Rpl19-ps11	1.15548	3.34	24.4015	7.82098e-07	6.5712e-06	Rpl19-ps11
	Rpl21	2.44655	6.82271	144.341	2.99326e-33	1.04771e-31	Rpl21							Rpl21	1.82253	6.73732	50.2578	1.34816e-12	2.72502e-11	Rpl21
	Rpl21-ps15	1.56604	6.69886	203.735	3.1972e-46	1.85837e-44	Rpl21-ps15							Rpl21-ps15	1.4557	6.77617	89.8694	2.54413e-21	1.30424e-19	Rpl21-ps15
	Rpl22	1.13719	7.39575	74.3364	6.58767e-18	9.48154e-17	Rpl22							Rpl22	1.03063	7.38438	48.0426	4.17063e-12	7.86804e-11	Rpl22
	Rpl23	1.56806	7.9052	113.063	2.09009e-26	5.0758e-25	Rpl23							Rpl23	1.36615	7.90278	69.7975	6.57171e-17	2.24597e-15	Rpl23
	Rpl23a	1.40559	8.27931	110.642	7.08644e-26	1.67193e-24	Rpl23a							Rpl23a	1.23664	8.32422	51.6644	6.58466e-13	1.39471e-11	Rpl23a
	Rpl23a-ps3	1.41033	4.09594	88.5797	4.88284e-21	8.55558e-20	Rpl23a-ps3							Rpl23a-ps3	1.25622	4.00431	47.8497	4.60186e-12	8.64698e-11	Rpl23a-ps3
	Rpl24	1.17266	7.3678	79.4249	5.00899e-19	7.86201e-18	Rpl24							Rpl24	1.05979	7.39046	51.3174	7.85759e-13	1.6422e-11	Rpl24
	Rpl26	1.36751	8.20286	116.142	4.42537e-27	1.11653e-25	Rpl26							Rpl26	1.28533	8.21265	58.4355	2.1007e-14	5.30764e-13	Rpl26
	Rpl27a	1.44392	8.48746	107.923	2.79433e-25	6.41019e-24	Rpl27a							Rpl27a	1.21109	8.52659	58.0952	2.49739e-14	6.24304e-13	Rpl27a
	Rpl28-ps1	1.1803	3.54419	50.507	1.18742e-12	1.16484e-11	Rpl28-ps1							Rpl28-ps1	1.23926	3.56502	32.0678	1.48884e-08	1.66395e-07	Rpl28-ps1
	Rpl29	1.09777	7.03364	81.5209	1.73417e-19	2.80457e-18	Rpl29							Rpl29	1.00148	7.00052	52.9596	3.40475e-13	7.49204e-12	Rpl29
	Rpl3	1.20143	9.18184	107.662	3.1873e-25	7.30044e-24	Rpl3							Rpl3	1.05086	9.21773	35.2373	2.91878e-09	3.66766e-08	Rpl3
	Rpl30	1.46613	7.78821	54.807	1.32965e-13	1.41314e-12	Rpl30							Rpl30	1.26267	7.63099	45.0329	1.93754e-11	3.35137e-10	Rpl30
	Rpl31	1.25337	7.38022	81.3607	1.8806e-19	3.02825e-18	Rpl31							Rpl31	1.08441	7.29556	40.4947	1.9715e-10	2.98711e-09	Rpl31
	Rpl32	1.54652	7.9806	129.932	4.24083e-30	1.27234e-28	Rpl32							Rpl32	1.41747	7.96493	81.2816	1.95736e-19	8.41785e-18	Rpl32
	Rpl35	1.25304	7.56342	94.5813	2.35226e-22	4.53746e-21	Rpl35							Rpl35	1.04157	7.54007	48.411	3.45616e-12	6.58159e-11	Rpl35
	Rpl36	1.32244	7.14546	80.2534	3.29339e-19	5.21314e-18	Rpl36							Rpl36	1.22457	7.07345	84.3316	4.18379e-20	1.93452e-18	Rpl36
	Rpl36a	1.54559	6.85066	111.467	4.67569e-26	1.12089e-24	Rpl36a							Rpl36a	1.33306	6.82306	85.7331	2.05936e-20	9.64828e-19	Rpl36a
	Rpl36a-ps2	1.59264	3.17556	37.8266	7.73205e-10	5.68224e-09	Rpl36a-ps2							Rpl36a-ps2	1.34697	2.90129	29.8352	4.7037e-08	4.88998e-07	Rpl36a-ps2
	Rpl37	1.36232	7.21657	55.1545	1.11418e-13	1.19179e-12	Rpl37							Rpl37	1.23669	7.12253	67.9757	1.65521e-16	5.40868e-15	Rpl37
	Rpl37a	1.41017	7.85029	78.2578	9.04347e-19	1.38874e-17	Rpl37a							Rpl37a	1.26306	7.78808	62.8487	2.23211e-15	6.35455e-14	Rpl37a
	Rpl38	1.67739	6.52689	56.2665	6.32843e-14	6.9232e-13	Rpl38							Rpl38	1.3471	6.36676	55.1755	1.10233e-13	2.56105e-12	Rpl38
	Rpl38-ps2	1.38184	3.45776	19.6101	9.49637e-06	4.10793e-05	Rpl38-ps2							Rpl38-ps2	1.18432	3.19998	20.695	5.38552e-06	3.84211e-05	Rpl38-ps2
	Rpl39	1.44317	6.76258	69.455	7.81791e-17	1.06072e-15	Rpl39							Rpl39	1.29558	6.61945	83.3459	6.88804e-20	3.0888e-18	Rpl39
	Rpl39-ps	1.46684	0.820458	17.1315	3.48784e-05	0.000136645	Rpl39-ps							Rpl39-ps	1.25725	0.668741	11.6903	0.000628277	0.00264647	Rpl39-ps
	Rpl3-ps1	1.07501	5.32097	53.1135	3.14815e-13	3.23962e-12	Rpl3-ps1							Rpl3-ps1	1.03929	5.19925	61.8582	3.69095e-15	1.02398e-13	Rpl3-ps1
	Rpl4	1.20506	9.47115	123.81	9.27068e-29	2.57901e-27	Rpl4							Rpl4	1.1086	9.53291	33.2471	8.11587e-09	9.49755e-08	Rpl4
	Rpl41	1.56537	8.22463	192.138	1.08558e-43	5.69968e-42	Rpl41							Rpl41	1.63178	8.15856	52.6275	4.03195e-13	8.80371e-12	Rpl41
	Rpl5	1.46439	8.91694	180.438	3.8882e-41	1.86421e-39	Rpl5							Rpl5	1.3019	8.93134	52.5155	4.26855e-13	9.27738e-12	Rpl5
	Rpl6	1.32301	8.82668	145.014	2.13263e-33	7.49993e-32	Rpl6							Rpl6	1.21343	8.86502	45.6153	1.4391e-11	2.54522e-10	Rpl6
	Rpl6l	1.38016	4.91672	65.8025	4.98458e-16	6.37436e-15	Rpl6l							Rpl6l	1.23888	4.94455	62.7334	2.36664e-15	6.69713e-14	Rpl6l
	Rpl7	1.11588	8.8607	89.9452	2.44843e-21	4.40925e-20	Rpl7							Rpl7	1.05467	8.88522	38.9659	4.31272e-10	6.18872e-09	Rpl7
	Rpl7a-ps11	1.19057	2.06074	29.6153	5.26877e-08	3.12749e-07	Rpl7a-ps11							Rpl7a-ps11	1.13919	2.02474	14.3916	0.000148465	0.000747822	Rpl7a-ps11
	Rpl7a-ps5	1.16132	3.453	15.0666	0.000103784	0.000372449	Rpl7a-ps5							Rpl7a-ps5	1.19028	3.24052	13.7651	0.000207146	0.000999968	Rpl7a-ps5
	Rpl9	1.22465	7.95859	115.04	7.71069e-27	1.91943e-25	Rpl9							Rpl9	1.04258	7.91259	56.2277	6.45461e-14	1.53489e-12	Rpl9
	Rpl9-ps4	1.24508	3.82926	39.5423	3.21026e-10	2.48279e-09	Rpl9-ps4							Rpl9-ps4	1.06887	4.00212	19.7806	8.68615e-06	5.8945e-05	Rpl9-ps4
	Rpl9-ps6	1.31173	5.09855	148.571	3.55808e-34	1.28773e-32	Rpl9-ps6							Rpl9-ps6	1.44719	5.26378	75.2638	4.11838e-18	1.56642e-16	Rpl9-ps6
	Rplp0	1.41953	9.44908	171.371	3.71284e-39	1.62352e-37	Rplp0							Rplp0	1.26201	9.48762	41.544	1.15249e-10	1.79588e-09	Rplp0
	Rplp1	1.2203	9.67023	85.0048	2.9764e-20	5.01482e-19	Rplp1							Rplp1	1.04496	9.63657	26.2978	2.92619e-07	2.65402e-06	Rplp1
	Rplp2	1.32527	8.25755	104.132	1.89272e-24	4.16258e-23	Rplp2							Rplp2	1.1343	8.16081	52.9504	3.42079e-13	7.51565e-12	Rplp2
	Rps10	1.19935	7.74772	84.1118	4.67566e-20	7.78981e-19	Rps10							Rps10	1.05296	7.69639	55.7141	8.38159e-14	1.96018e-12	Rps10
	Rps10-ps2	1.15251	6.5471	99.9718	1.54586e-23	3.22382e-22	Rps10-ps2							Rps10-ps2	1.08321	6.54848	51.7831	6.19821e-13	1.32275e-11	Rps10-ps2
	Rps11	1.34031	5.43502	82.4053	1.10858e-19	1.8046e-18	Rps11							Rps11	1.04166	5.2469	43.2668	4.77622e-11	7.90394e-10	Rps11
	Rps12	1.36714	7.69684	75.6711	3.35081e-18	4.93715e-17	Rps12							Rps12	1.2063	7.61793	57.1904	3.95602e-14	9.67716e-13	Rps12
	Rps12-ps3	1.33321	6.33212	92.7357	5.97651e-22	1.12378e-20	Rps12-ps3							Rps12-ps3	1.3846	6.35089	66.4248	3.63497e-16	1.14038e-14	Rps12-ps3
	Rps12-ps4	1.58033	1.119	28.342	1.01664e-07	5.8327e-07	Rps12-ps4							Rps12-ps4	1.20518	1.02193	10.3782	0.00127511	0.0049078	Rps12-ps4
	Rps13	1.14549	7.6204	91.4457	1.14697e-21	2.10363e-20	Rps13							Rps13	1.10669	7.58822	57.1092	4.12264e-14	1.00398e-12	Rps13
	Rps13-ps2	1.11432	1.18102	14.2421	0.000160738	0.000555966	Rps13-ps2							Rps13-ps2	1.01869	1.23913	8.86551	0.00290609	0.0100509	Rps13-ps2
	Rps14	1.43701	8.79533	103.422	2.70819e-24	5.88656e-23	Rps14							Rps14	1.28565	8.79603	53.4905	2.59846e-13	5.77168e-12	Rps14
	Rps15	1.26547	8.41308	93.4511	4.16358e-22	7.89862e-21	Rps15							Rps15	1.11333	8.39929	48.7475	2.91129e-12	5.635e-11	Rps15
	Rps15a	1.22293	7.59961	106.077	7.09265e-25	1.59275e-23	Rps15a							Rps15a	1.12187	7.559	62.3809	2.83057e-15	7.94637e-14	Rps15a
	Rps15a-ps6	1.49049	0.703836	20.3728	6.37278e-06	2.83352e-05	Rps15a-ps6							Rps15a-ps6	1.33311	0.667575	12.3809	0.000433744	0.00191265	Rps15a-ps6
	Rps16	1.3954	8.19821	92.4971	6.74243e-22	1.25985e-20	Rps16							Rps16	1.16521	8.18821	51.4117	7.489e-13	1.57447e-11	Rps16
	Rps16-ps2	1.39235	5.1685	84.3422	4.1614e-20	6.96416e-19	Rps16-ps2							Rps16-ps2	1.08834	5.18536	39.6355	3.06062e-10	4.49685e-09	Rps16-ps2
	Rps18	1.37862	8.11866	108.915	1.69435e-25	3.94141e-24	Rps18							Rps18	1.26942	8.06492	72.1112	2.03403e-17	7.28595e-16	Rps18
	Rps19	1.40416	7.66857	99.3934	2.07015e-23	4.29917e-22	Rps19							Rps19	1.18013	7.62392	59.8208	1.03897e-14	2.73242e-13	Rps19
	Rps2	1.33412	8.40393	131.061	2.40054e-30	7.24584e-29	Rps2							Rps2	1.20141	8.42956	51.8186	6.08716e-13	1.30102e-11	Rps2
	Rps20	1.27832	7.83801	105.636	8.85894e-25	1.97748e-23	Rps20							Rps20	1.14785	7.82533	62.7874	2.30273e-15	6.52932e-14	Rps20
	Rps21	1.34	7.44786	54.1299	1.87666e-13	1.96786e-12	Rps21							Rps21	1.14539	7.32876	46.1648	1.08714e-11	1.9545e-10	Rps21
	Rps23	1.29946	8.59186	63.8428	1.34755e-15	1.68568e-14	Rps23							Rps23	1.12054	8.53366	48.8126	2.8163e-12	5.4661e-11	Rps23
	Rps24	1.15006	8.81303	81.8493	1.46872e-19	2.37786e-18	Rps24							Rps24	1.05788	8.79636	39.9653	2.58511e-10	3.84613e-09	Rps24
	Rps24-ps3	1.36228	0.6022	19.8402	8.41915e-06	3.67607e-05	Rps24-ps3							Rps24-ps3	1.52136	0.393747	17.5957	2.73212e-05	0.000166337	Rps24-ps3
	Rps25	1.30333	8.35696	110.765	6.66122e-26	1.5766e-24	Rps25							Rps25	1.16739	8.35776	49.329	2.16436e-12	4.24148e-11	Rps25
	Rps26	1.36794	7.6904	135.611	2.42679e-31	7.63415e-30	Rps26							Rps26	1.2315	7.74007	64.4811	9.74627e-16	2.90316e-14	Rps26
	Rps27	1.65864	7.16147	40.888	1.61204e-10	1.28955e-09	Rps27							Rps27	1.42395	7.01339	51.5286	7.05612e-13	1.48788e-11	Rps27
	Rps27a-ps2	1.98297	1.97138	31.6249	1.87014e-08	1.1786e-07	Rps27a-ps2							Rps27a-ps2	1.38275	1.69064	19.2057	1.17364e-05	7.73806e-05	Rps27a-ps2
	Rps28	1.67886	6.72671	42.9417	5.63948e-11	4.71887e-10	Rps28							Rps28	1.44712	6.41788	61.0358	5.60471e-15	1.50762e-13	Rps28
	Rps2-ps10	1.33265	2.76038	27.1101	1.92193e-07	1.06337e-06	Rps2-ps10							Rps2-ps10	1.17047	2.92905	12.9027	0.000328107	0.0015019	Rps2-ps10
	Rps2-ps13	1.27797	4.21152	91.3994	1.17411e-21	2.14811e-20	Rps2-ps13							Rps2-ps13	1.26409	4.18103	42.2195	8.15842e-11	1.29454e-09	Rps2-ps13
	Rps3	1.19709	9.05909	84.7028	3.46755e-20	5.81604e-19	Rps3							Rps3	1.04417	9.09203	35.0951	3.13994e-09	3.92118e-08	Rps3
	Rps3a1	1.22211	9.17427	83.2104	7.37685e-20	1.21677e-18	Rps3a1							Rps3a1	1.0503	9.20034	31.415	2.08366e-08	2.27482e-07	Rps3a1
	Rps3a3	1.35022	1.23323	18.8869	1.38699e-05	5.83232e-05	Rps3a3							Rps3a3	1.30504	1.1557	16.5964	4.62399e-05	0.000266279	Rps3a3
	Rps4x	1.2501	9.13365	110.971	6.0042e-26	1.43246e-24	Rps4x							Rps4x	1.15986	9.16353	42.1494	8.45589e-11	1.33828e-09	Rps4x
	Rps5	1.4943	8.31893	132.277	1.30122e-30	3.9678e-29	Rps5							Rps5	1.33752	8.3494	62.1489	3.18437e-15	8.9219e-14	Rps5
	Rps6	1.28937	8.87911	129.738	4.67551e-30	1.39433e-28	Rps6							Rps6	1.14322	8.9271	42.7637	6.17663e-11	9.98779e-10	Rps6
	Rps7	1.17398	7.9127	85.9643	1.83213e-20	3.09738e-19	Rps7							Rps7	1.10275	7.92064	51.3664	7.66383e-13	1.60645e-11	Rps7
	Rps7-ps3	1.23656	6.2906	97.3487	5.81321e-23	1.17136e-21	Rps7-ps3							Rps7-ps3	1.09103	6.40765	45.3618	1.63797e-11	2.87183e-10	Rps7-ps3
	Rpsa	1.64923	8.87254	190.597	2.35505e-43	1.21509e-41	Rpsa							Rpsa	1.41926	8.89723	58.371	2.17064e-14	5.46484e-13	Rpsa
	Rpsa-ps10	1.58143	4.78308	123.761	9.50068e-29	2.63317e-27	Rpsa-ps10							Rpsa-ps10	1.52893	4.77994	79.584	4.62155e-19	1.912e-17	Rpsa-ps10
	Rragd	3.48637	4.37429	570.163	5.1742e-126	1.40277e-123	Rragd							Rragd	3.48846	4.57029	318.042	3.86731e-71	2.37907e-68	Rragd
	Rsad2	1.82381	3.41092	40.5887	1.87891e-10	1.48865e-09	Rsad2							Rsad2	1.91816	3.642	23.1973	1.46204e-06	1.16412e-05	Rsad2
	Rspo1	1.23405	2.50812	30.4829	3.3683e-08	2.04999e-07	Rspo1							Rspo1	1.42983	2.57968	28.8445	7.84265e-08	7.84209e-07	Rspo1
	Rtcb	1.54025	7.50048	177.854	1.42578e-40	6.623e-39	Rtcb							Rtcb	1.58063	7.57756	131.259	2.17289e-30	2.3116e-28	Rtcb
	Rtkn2	1.31109	0.472255	14.9125	0.000112614	0.000402105	Rtkn2							Rtkn2	1.53259	-0.0324447	12.8408	0.000339139	0.0015459	Rtkn2
	Rtn1	-1.20188	6.35704	202.06	7.41863e-46	4.22211e-44	Rtn1							Rtn1	-1.40039	6.35775	125.684	3.60471e-29	3.61724e-27	Rtn1
	Rttn	1.01007	4.79786	82.7196	9.45568e-20	1.54429e-18	Rttn							Rttn	1.31497	4.88277	84.1012	4.70074e-20	2.15167e-18	Rttn
	Runx2	1.93705	1.5299	48.3721	3.52546e-12	3.28551e-11	Runx2							Runx2	1.42339	1.73472	12.3473	0.000441623	0.00194355	Runx2
	Rusc2	1.01062	5.59182	110.078	9.42165e-26	2.20198e-24	Rusc2							Rusc2	1.11869	5.62528	76.7455	1.94471e-18	7.62207e-17	Rusc2
	Rxfp1	-1.17124	2.79336	31.6808	1.81709e-08	1.14808e-07	Rxfp1							Rxfp1	-1.12522	2.47966	6.52378	0.0106442	0.0301812	Rxfp1
	Rxrg	2.30408	3.94437	102.331	4.69716e-24	1.00776e-22	Rxrg							Rxrg	2.27834	3.57639	135.973	2.02214e-31	2.32611e-29	Rxrg
	S100a1	1.56839	3.26466	76.3134	2.42034e-18	3.59341e-17	S100a1							S100a1	1.14354	3.21637	22.3525	2.2692e-06	1.73551e-05	S100a1
	S100a10	-1.39898	2.0118	31.3144	2.19441e-08	1.37022e-07	S100a10							S100a10	-2.05903	2.32847	19.5644	9.7265e-06	6.52848e-05	S100a10
	S100b	4.50615	2.84596	94.6164	2.31101e-22	4.46945e-21	S100b							S100b	2.89119	2.23227	33.0739	8.87236e-09	1.02813e-07	S100b
	Samd9l	2.05341	5.32831	129.224	6.05853e-30	1.796e-28	Samd9l							Samd9l	1.78993	5.24769	57.7126	3.03346e-14	7.47742e-13	Samd9l
	Satb2	1.98181	2.49979	73.9344	8.0756e-18	1.16007e-16	Satb2							Satb2	1.94029	2.26772	41.0703	1.46854e-10	2.25607e-09	Satb2
	Sc5d	1.41032	5.0113	173.003	1.63393e-39	7.22952e-38	Sc5d							Sc5d	1.09687	4.84903	59.0991	1.49926e-14	3.86395e-13	Sc5d
	Scamp5	-1.04649	8.25134	136.652	1.43671e-31	4.58731e-30	Scamp5							Scamp5	-1.07044	8.0868	56.4905	5.64699e-14	1.35582e-12	Scamp5
	Scarb1	1.01752	6.1581	112.178	3.26579e-26	7.85424e-25	Scarb1							Scarb1	1.06929	6.01504	73.503	1.00482e-17	3.7024e-16	Scarb1
	Scd1	2.72841	3.33298	48.3572	3.5523e-12	3.30639e-11	Scd1							Scd1	1.24126	2.92229	14.3388	0.000152687	0.000766632	Scd1
	Scd2	1.69766	8.17453	300.798	2.20773e-67	2.27031e-65	Scd2							Scd2	1.48386	8.16089	102.711	3.87713e-24	2.66298e-22	Scd2
	Scml4	4.81566	0.949242	135.679	2.34483e-31	7.39192e-30	Scml4							Scml4	4.30928	0.835959	71.8788	2.28829e-17	8.15543e-16	Scml4
	Scpep1	1.14886	7.20194	156.719	5.89492e-36	2.32831e-34	Scpep1							Scpep1	1.18264	7.29235	93.9089	3.30382e-22	1.85499e-20	Scpep1
	Scube1	-1.39522	3.28979	89.8892	2.51875e-21	4.53041e-20	Scube1							Scube1	-1.11703	3.11852	24.4478	7.63489e-07	6.43396e-06	Scube1
	Sdc3	2.39495	8.7144	318.151	3.66166e-71	4.29914e-69	Sdc3							Sdc3	2.47754	8.94075	160.996	6.85526e-37	1.08983e-34	Sdc3
	Sdf2l1	1.38455	6.80254	190.804	2.12214e-43	1.09872e-41	Sdf2l1							Sdf2l1	1.33573	6.8773	83.343	6.89843e-20	3.0888e-18	Sdf2l1
	Sdf4	1.2743	8.3693	190.817	2.1083e-43	1.09536e-41	Sdf4							Sdf4	1.28662	8.43004	94.0805	3.0295e-22	1.71458e-20	Sdf4
	Sec16b	-1.29277	3.12704	33.7794	6.17282e-09	4.10906e-08	Sec16b							Sec16b	-1.79005	2.90645	44.1959	2.97106e-11	5.05876e-10	Sec16b
	Sel1l3	4.04074	1.99143	128.422	9.07535e-30	2.67436e-28	Sel1l3							Sel1l3	3.35753	1.91673	31.602	1.89239e-08	2.08694e-07	Sel1l3
	Selenom	1.76171	3.3435	76.7056	1.98442e-18	2.9649e-17	Selenom							Selenom	1.94799	3.40912	47.8267	4.65619e-12	8.72588e-11	Selenom
	Sema4b	-2.1309	5.24156	181.091	2.80019e-41	1.34689e-39	Sema4b							Sema4b	-2.35857	5.02129	252.913	6.01822e-57	2.3014e-54	Sema4b
	Sema6d	-1.85247	4.34179	139.399	3.60278e-32	1.19115e-30	Sema6d							Sema6d	-1.94405	4.23688	50.2509	1.35292e-12	2.73007e-11	Sema6d
	Serpina3n	4.69918	0.325556	54.4781	1.57188e-13	1.66111e-12	Serpina3n							Serpina3n	4.24901	-0.249729	59.0371	1.54729e-14	3.97326e-13	Serpina3n
	Serpinb1c	5.49413	1.00359	124.289	7.28229e-29	2.03414e-27	Serpinb1c							Serpinb1c	5.33171	0.85029	97.5265	5.31394e-23	3.22691e-21	Serpinb1c
	Serpinb6a	1.35294	4.09638	84.851	3.21723e-20	5.40226e-19	Serpinb6a							Serpinb6a	1.04764	4.23311	13.5987	0.000226338	0.00108155	Serpinb6a
	Serpinb6b	3.29347	1.38536	81.443	1.80386e-19	2.91097e-18	Serpinb6b							Serpinb6b	2.07933	1.44944	20.4186	6.22215e-06	4.35828e-05	Serpinb6b
	Serpine1	1.77909	5.69508	133.381	7.46309e-31	2.28505e-29	Serpine1							Serpine1	1.79269	5.63444	56.7012	5.07322e-14	1.22493e-12	Serpine1
	Serpine2	1.77184	10.0423	289.818	5.44849e-65	5.41617e-63	Serpine2							Serpine2	1.89844	10.0348	88.6848	4.63e-21	2.30669e-19	Serpine2
	Serpinf1	-1.91575	4.83566	268.974	1.89869e-60	1.72631e-58	Serpinf1							Serpinf1	-2.35964	4.79448	186.62	1.73874e-42	3.96797e-40	Serpinf1
	Setbp1	-1.31853	2.82908	35.7679	2.22285e-09	1.54956e-08	Setbp1							Setbp1	-1.49795	2.75601	32.5769	1.14567e-08	1.30621e-07	Setbp1
	Sfmbt2	-1.41118	2.32743	33.7607	6.2324e-09	4.14687e-08	Sfmbt2							Sfmbt2	-1.18446	1.71174	13.6737	0.000217481	0.00104381	Sfmbt2
	Sgsh	-1.48687	4.55822	131.62	1.81214e-30	5.49203e-29	Sgsh							Sgsh	-1.71407	4.42409	125.078	4.89258e-29	4.74145e-27	Sgsh
	Sh3bgrl	1.80541	5.02453	229.208	8.87081e-52	6.12373e-50	Sh3bgrl							Sh3bgrl	1.21446	5.29041	24.6173	6.99208e-07	5.92401e-06	Sh3bgrl
	Sh3pxd2b	3.37755	5.35264	508.347	1.45164e-112	3.23066e-110	Sh3pxd2b							Sh3pxd2b	2.66863	5.5408	69.9595	6.05338e-17	2.07887e-15	Sh3pxd2b
	Shcbp1l	1.38408	1.87229	29.5694	5.39502e-08	3.19734e-07	Shcbp1l							Shcbp1l	1.77222	1.77614	34.0639	5.33321e-09	6.41663e-08	Shcbp1l
	Shisa5	1.01642	7.89925	114.527	9.9914e-27	2.47068e-25	Shisa5							Shisa5	1.2243	8.01603	67.8615	1.7539e-16	5.71796e-15	Shisa5
	Shisa7	1.33714	3.78896	76.8606	1.83458e-18	2.7576e-17	Shisa7							Shisa7	1.32774	3.85229	47.8306	4.64673e-12	8.71971e-11	Shisa7
	Shoc1	-1.41296	0.680371	13.4222	0.000248661	0.00082895	Shoc1							Shoc1	-1.67464	0.272372	15.4464	8.48799e-05	0.000455601	Shoc1
	Siglece	-1.86567	5.96893	264.887	1.47664e-59	1.30285e-57	Siglece							Siglece	-2.02248	5.79446	208.36	3.13061e-47	8.85901e-45	Siglece
	Siglecf	1.381	6.06204	230.24	5.28548e-52	3.66566e-50	Siglecf							Siglecf	1.3372	6.18116	81.3569	1.8842e-19	8.12791e-18	Siglecf
	Siglecg	-2.16871	2.45221	80.3278	3.17174e-19	5.03126e-18	Siglecg							Siglecg	-2.34573	2.37036	39.9466	2.60997e-10	3.87904e-09	Siglecg
	Sil1	1.12892	5.64504	136.854	1.29792e-31	4.162e-30	Sil1							Sil1	1.14843	5.65768	60.5044	7.34159e-15	1.95624e-13	Sil1
	Skint3	-1.77629	1.04395	35.7034	2.29756e-09	1.59865e-08	Skint3							Skint3	-2.16584	1.00154	28.4358	9.68575e-08	9.52354e-07	Skint3
	Slc12a5	-1.30048	1.64471	18.0063	2.20178e-05	8.95547e-05	Slc12a5							Slc12a5	-2.29001	1.47607	23.0326	1.59281e-06	1.25903e-05	Slc12a5
	Slc13a3	-1.67098	4.29982	123.573	1.04453e-28	2.8896e-27	Slc13a3							Slc13a3	-1.59763	4.13645	81.5625	1.69805e-19	7.36986e-18	Slc13a3
	Slc13a4	-1.09366	1.48405	9.69211	0.00185061	0.00505764	Slc13a4							Slc13a4	-2.31852	1.51965	18.515	1.68569e-05	0.000107727	Slc13a4
	Slc15a3	1.34614	7.99075	208.72	2.61295e-47	1.55226e-45	Slc15a3							Slc15a3	1.33616	8.06242	76.2484	2.50139e-18	9.67699e-17	Slc15a3
	Slc16a1	1.27707	5.08086	122.035	2.26778e-28	6.14816e-27	Slc16a1							Slc16a1	1.16977	5.05945	92.7297	5.99459e-22	3.225e-20	Slc16a1
	Slc16a3	1.75717	6.45766	246.302	1.66218e-55	1.29763e-53	Slc16a3							Slc16a3	1.37696	6.53125	70.0764	5.70513e-17	1.96883e-15	Slc16a3
	Slc16a8	2.04224	2.13906	47.8013	4.71681e-12	4.3415e-11	Slc16a8							Slc16a8	2.16297	2.10283	35.7078	2.29242e-09	2.93533e-08	Slc16a8
	Slc18a1	1.10041	0.544008	11.3847	0.000740536	0.00222668	Slc18a1							Slc18a1	1.16074	0.565827	9.11777	0.00253139	0.00894521	Slc18a1
	Slc1a4	-1.15128	3.34401	30.6907	3.02612e-08	1.85308e-07	Slc1a4							Slc1a4	-1.19246	3.22017	23.6253	1.17041e-06	9.51189e-06	Slc1a4
	Slc22a4	-1.11706	0.581656	9.50296	0.00205141	0.00556156	Slc22a4							Slc22a4	-1.42449	0.741078	12.3746	0.000435223	0.00191837	Slc22a4
	Slc25a13	1.34947	3.04773	60.2905	8.18418e-15	9.77057e-14	Slc25a13							Slc25a13	1.16257	3.14248	25.9514	3.50125e-07	3.1287e-06	Slc25a13
	Slc25a25	1.4562	5.6872	136.108	1.88994e-31	6.00873e-30	Slc25a25							Slc25a25	1.31171	5.54043	66.1346	4.21151e-16	1.30437e-14	Slc25a25
	Slc25a37	-1.1545	7.63522	155.428	1.12896e-35	4.39526e-34	Slc25a37							Slc25a37	-1.19046	7.56219	63.8348	1.353e-15	3.93094e-14	Slc25a37
	Slc25a43	1.44427	2.36591	34.6237	4.0001e-09	2.72106e-08	Slc25a43							Slc25a43	1.20034	2.36531	18.7895	1.45969e-05	9.49135e-05	Slc25a43
	Slc26a11	-1.7369	3.40974	120.594	4.68829e-28	1.25732e-26	Slc26a11							Slc26a11	-2.1638	3.38441	47.1676	6.51676e-12	1.20688e-10	Slc26a11
	Slc2a1	1.22144	6.71173	104.023	1.99941e-24	4.3843e-23	Slc2a1							Slc2a1	1.10141	6.87109	29.4201	5.82707e-08	5.95287e-07	Slc2a1
	Slc2a12	-1.35557	1.44396	8.82519	0.002971	0.00773597	Slc2a12							Slc2a12	-1.85957	1.31216	16.9258	3.88687e-05	0.00022953	Slc2a12
	Slc2a3	1.06047	4.25539	82.5616	1.02426e-19	1.67098e-18	Slc2a3							Slc2a3	1.05984	4.25375	44.4555	2.60204e-11	4.46258e-10	Slc2a3
	Slc2a6	2.92458	4.2925	293.656	7.94213e-66	7.948e-64	Slc2a6							Slc2a6	2.31833	4.23739	70.8127	3.92809e-17	1.36893e-15	Slc2a6
	Slc36a2	-1.72086	2.17822	51.7812	6.20428e-13	6.23817e-12	Slc36a2							Slc36a2	-2.22157	2.10269	29.6219	5.25087e-08	5.38757e-07	Slc36a2
	Slc39a12	-1.76976	3.87294	182.321	1.50906e-41	7.28208e-40	Slc39a12							Slc39a12	-2.06838	3.722	75.5151	3.62631e-18	1.38298e-16	Slc39a12
	Slc39a2	1.28943	1.3403	24.3088	8.20646e-07	4.15788e-06	Slc39a2							Slc39a2	1.18705	1.02778	9.39177	0.00217961	0.00784716	Slc39a2
	Slc40a1	-1.47857	7.27672	311.333	1.11909e-69	1.23605e-67	Slc40a1							Slc40a1	-1.30645	7.21012	97.4212	5.60431e-23	3.37427e-21	Slc40a1
	Slc43a1	-1.21009	1.48734	20.5179	5.90771e-06	2.64534e-05	Slc43a1							Slc43a1	-1.55202	1.1958	14.2169	0.0001629	0.000811862	Slc43a1
	Slc44a1	1.53793	6.35799	267.588	3.80679e-60	3.41947e-58	Slc44a1							Slc44a1	1.49257	6.46007	115.584	5.8629e-27	5.05818e-25	Slc44a1
	Slc45a3	2.91374	1.85845	82.7468	9.32646e-20	1.52653e-18	Slc45a3							Slc45a3	2.65276	1.45591	36.964	1.20328e-09	1.60615e-08	Slc45a3
	Slc4a10	-1.04112	2.55304	9.4786	0.00207883	0.00562668	Slc4a10							Slc4a10	-2.10751	2.51979	15.0657	0.000103831	0.000546542	Slc4a10
	Slc4a11	2.03961	0.0794983	13.5847	0.00022804	0.000765491	Slc4a11							Slc4a11	2.96533	0.505571	22.2865	2.34854e-06	1.79038e-05	Slc4a11
	Slc5a10	-2.11673	2.00391	65.2632	6.55335e-16	8.33053e-15	Slc5a10							Slc5a10	-2.40767	1.9143	46.852	7.65569e-12	1.40676e-10	Slc5a10
	Slc5a5	-1.39368	1.07658	19.2566	1.14275e-05	4.86984e-05	Slc5a5							Slc5a5	-2.2351	1.06214	30.638	3.10952e-08	3.31299e-07	Slc5a5
	Slc6a16	2.33657	0.15739	15.7829	7.10414e-05	0.00026318	Slc6a16							Slc6a16	3.98612	-0.133558	37.7731	7.947e-10	1.09807e-08	Slc6a16
	Slc8a2	1.27991	1.20872	17.7972	2.45744e-05	9.8768e-05	Slc8a2							Slc8a2	1.36397	1.01658	16.3141	5.36632e-05	0.000302985	Slc8a2
	Slco4a1	-1.9442	5.61179	125.815	3.37557e-29	9.66088e-28	Slco4a1							Slco4a1	-2.24878	5.55849	77.2357	1.51728e-18	5.97995e-17	Slco4a1
	Slfn4	-1.03918	1.59718	7.31804	0.00682658	0.0161599	Slfn4							Slfn4	-3.24186	3.12853	14.6769	0.000127602	0.000654618	Slfn4
	Slfn5	2.21688	5.94853	83.8549	5.32456e-20	8.85111e-19	Slfn5							Slfn5	2.4081	6.21436	94.982	1.92122e-22	1.10952e-20	Slfn5
	Slfn9	1.29012	4.12162	37.0118	1.17415e-09	8.44561e-09	Slfn9							Slfn9	1.45421	4.24832	47.7604	4.81611e-12	9.00173e-11	Slfn9
	Smco4	1.55042	1.7676	32.5224	1.1783e-08	7.57311e-08	Smco4							Smco4	1.3493	1.71642	19.4006	1.05971e-05	7.05595e-05	Smco4
	Smpd3	-1.31835	0.450927	13.9928	0.000183512	0.000627317	Smpd3							Smpd3	-1.32155	0.468636	10.7343	0.0010517	0.00415423	Smpd3
	Smpdl3b	-1.14072	3.40476	50.6172	1.12255e-12	1.10484e-11	Smpdl3b							Smpdl3b	-1.02471	3.40184	24.049	9.39147e-07	7.80728e-06	Smpdl3b
	Snap25	-1.13563	1.72709	7.34121	0.00673913	0.0159782	Snap25							Snap25	-1.46985	1.24983	6.66892	0.00981089	0.0281971	Snap25
	Snn	-1.0543	7.70911	178.177	1.21186e-40	5.6469e-39	Snn							Snn	-1.08527	7.6304	98.7298	2.8942e-23	1.77273e-21	Snn
	Snph	-1.46541	4.3736	68.2053	1.47329e-16	1.96145e-15	Snph							Snph	-1.46449	4.16849	47.1648	6.52621e-12	1.20705e-10	Snph
	Snta1	-1.17054	6.33073	191.664	1.37794e-43	7.20926e-42	Snta1							Snta1	-1.12821	6.3568	55.5528	9.09804e-14	2.11724e-12	Snta1
	Soat1	1.17073	7.27578	189.462	4.16667e-43	2.12045e-41	Soat1							Soat1	1.26279	7.34411	99.3959	2.0675e-23	1.29438e-21	Soat1
	Socs2	2.11708	2.84886	124.349	7.06608e-29	1.98049e-27	Socs2							Socs2	1.88088	2.52488	34.5332	4.1904e-09	5.13134e-08	Socs2
	Sorbs1	1.85735	3.89229	50.6541	1.10165e-12	1.08642e-11	Sorbs1							Sorbs1	1.22005	3.33578	22.3024	2.32913e-06	1.77942e-05	Sorbs1
	Sostdc1	-1.56683	1.2915	13.778	0.000205732	0.000697516	Sostdc1							Sostdc1	-2.41287	1.53536	18.579	1.63005e-05	0.000104502	Sostdc1
	Sox5	2.19394	0.98407	29.9978	4.32541e-08	2.6017e-07	Sox5							Sox5	2.59931	0.911675	35.3949	2.69196e-09	3.41602e-08	Sox5
	Sox7	5.1209	3.07346	276.356	4.67484e-62	4.38406e-60	Sox7							Sox7	4.9672	3.30083	111.583	4.40868e-26	3.64786e-24	Sox7
	Sp100	1.29311	5.96974	78.0996	9.79717e-19	1.50139e-17	Sp100							Sp100	1.49815	6.1698	90.1969	2.15599e-21	1.11332e-19	Sp100
	Spata45	-1.38369	0.347091	12.9149	0.000325981	0.00105809	Spata45							Spata45	-1.22701	0.112076	6.90295	0.00860538	0.0251254	Spata45
	Speg	1.41896	6.04993	201.889	8.08302e-46	4.56537e-44	Speg							Speg	1.41302	5.91061	95.8155	1.26107e-22	7.34272e-21	Speg
	Spns3	-1.04786	3.72767	54.6213	1.46141e-13	1.54766e-12	Spns3							Spns3	-1.11885	3.53911	21.2552	4.02028e-06	2.93514e-05	Spns3
	Spryd7	1.29999	3.95707	92.5307	6.62899e-22	1.24021e-20	Spryd7							Spryd7	1.37419	4.08728	51.8382	6.02682e-13	1.29007e-11	Spryd7
	Sptbn1	1.36787	5.88093	58.5652	1.9666e-14	2.27142e-13	Sptbn1							Sptbn1	1.24144	5.8668	43.5141	4.20919e-11	7.03138e-10	Sptbn1
	Srebf2	1.54891	6.70592	249.524	3.29751e-56	2.68684e-54	Srebf2							Srebf2	1.28807	6.64383	101.25	8.10957e-24	5.38696e-22	Srebf2
	Srl	-1.11609	3.46048	57.2479	3.84199e-14	4.31061e-13	Srl							Srl	-1.46798	3.31917	45.2399	1.74314e-11	3.03366e-10	Srl
	St14	2.45283	7.05249	608.029	3.0019e-134	9.13496e-132	St14							St14	2.52509	7.04304	309.901	2.29509e-69	1.24897e-66	St14
	St8sia4	1.48493	5.44021	218.82	1.63608e-49	1.03371e-47	St8sia4							St8sia4	1.42413	5.57482	63.8225	1.36149e-15	3.94748e-14	St8sia4
	St8sia6	2.9193	5.69323	467.088	1.37879e-103	2.85544e-101	St8sia6							St8sia6	3.01648	5.92369	334.672	9.23288e-75	6.5318e-72	St8sia6
	Stab1	-1.42811	9.88373	106.803	4.9168e-25	1.1159e-23	Stab1							Stab1	-1.49218	9.785	43.4546	4.33913e-11	7.22287e-10	Stab1
	Stard4	1.92167	3.66126	187.301	1.23468e-42	6.15731e-41	Stard4							Stard4	1.69474	3.54261	68.1044	1.55066e-16	5.09055e-15	Stard4
	Stat1	1.13595	7.38573	67.9779	1.6534e-16	2.1934e-15	Stat1							Stat1	1.69172	7.71249	102.344	4.66708e-24	3.15954e-22	Stat1
	Stk32c	1.38528	-0.176237	10.7261	0.00105637	0.00306331	Stk32c							Stk32c	1.45475	0.0641828	8.68678	0.00320526	0.0109254	Stk32c
	Strip2	-1.2762	1.89201	9.37296	0.0022021	0.00593449	Strip2							Strip2	-1.64084	1.86509	7.37658	0.00660786	0.020141	Strip2
	Stum	1.6145	0.804069	18.2997	1.88732e-05	7.75683e-05	Stum							Stum	2.0167	0.600877	20.5448	5.82508e-06	4.11272e-05	Stum
	Stx3	1.43923	3.98688	113.536	1.64665e-26	4.03172e-25	Stx3							Stx3	1.44736	3.87612	57.4384	3.4873e-14	8.58118e-13	Stx3
	Sulf1	-1.07699	2.27331	6.36208	0.0116585	0.0260044	Sulf1							Sulf1	-1.49141	2.20171	7.15194	0.00748828	0.0224189	Sulf1
	Sulf2	2.9766	6.24566	876.524	1.24516e-192	5.9892e-190	Sulf2							Sulf2	2.7537	6.29143	194.671	3.03938e-44	7.41451e-42	Sulf2
	Sv2b	2.46171	0.344496	35.0222	3.25971e-09	2.23268e-08	Sv2b							Sv2b	2.85344	-0.176949	32.6027	1.13058e-08	1.29004e-07	Sv2b
	Synj2	1.46319	5.78792	241.567	1.79053e-54	1.34841e-52	Synj2							Synj2	1.43532	5.82583	104.5	1.57223e-24	1.12351e-22	Synj2
	Synpo	2.02014	2.21016	28.7017	8.44279e-08	4.88136e-07	Synpo							Synpo	1.82217	1.9507	25.745	3.89632e-07	3.44988e-06	Synpo
	Syt11	1.2204	5.59731	137.639	8.73967e-32	2.85158e-30	Syt11							Syt11	1.04813	5.64608	46.7663	7.99785e-12	1.46204e-10	Syt11
	Tafa3	2.13161	1.43191	52.7977	3.69741e-13	3.77617e-12	Tafa3							Tafa3	2.09207	1.46172	34.4522	4.36858e-09	5.33313e-08	Tafa3
	Tbc1d10c	-1.33187	1.31045	21.6384	3.292e-06	1.5311e-05	Tbc1d10c							Tbc1d10c	-1.21149	0.983603	9.81837	0.00172777	0.00638616	Tbc1d10c
	Tbx19	-1.63103	0.502001	11.0649	0.000879791	0.00260186	Tbx19							Tbx19	-2.90857	-0.116484	30.7456	2.94169e-08	3.14841e-07	Tbx19
	Tcap	4.61363	2.25298	186.349	1.99184e-42	9.90013e-41	Tcap							Tcap	3.55631	1.94924	99.784	1.69953e-23	1.09303e-21	Tcap
	Tceal9	1.41997	4.58907	138.582	5.43734e-32	1.78582e-30	Tceal9							Tceal9	1.23859	4.56386	59.05	1.53716e-14	3.95442e-13	Tceal9
	Tcf24	1.51472	2.45933	54.2743	1.74371e-13	1.83619e-12	Tcf24							Tcf24	1.74957	2.56641	32.7776	1.0333e-08	1.18382e-07	Tcf24
	Tcf7l2	-1.07896	4.38748	119.789	7.03568e-28	1.86009e-26	Tcf7l2							Tcf7l2	-1.08622	4.3111	41.469	1.19756e-10	1.85793e-09	Tcf7l2
	Tcim	1.69858	4.53359	141.487	1.2593e-32	4.25792e-31	Tcim							Tcim	1.69075	4.69723	99.5758	1.88795e-23	1.20327e-21	Tcim
	Tcstv1	-1.92043	0.808625	32.8586	9.91092e-09	6.44491e-08	Tcstv1							Tcstv1	-1.93139	0.565948	17.6542	2.64926e-05	0.000161534	Tcstv1
	Tecpr1	1.27697	6.81201	281.857	2.95746e-63	2.84508e-61	Tecpr1							Tecpr1	1.26975	6.77329	91.0188	1.42315e-21	7.43033e-20	Tecpr1
	Tent5c	1.15218	8.52918	154.393	1.90025e-35	7.28398e-34	Tent5c							Tent5c	1.42411	8.67891	99.7031	1.77046e-23	1.13349e-21	Tent5c
	Tet1	-1.24357	3.6715	61.3134	4.8675e-15	5.91037e-14	Tet1							Tet1	-1.28582	3.49636	33.6225	6.69137e-09	7.96268e-08	Tet1
	Tex101	-1.1547	0.873895	14.8328	0.000117477	0.000417767	Tex101							Tex101	-1.27215	0.457996	10.6126	0.0011232	0.00439496	Tex101
	Tgm1	-1.34971	1.37375	27.8908	1.28359e-07	7.27467e-07	Tgm1							Tgm1	-1.66202	1.22647	16.8152	4.12012e-05	0.000240692	Tgm1
	Tgm2	-1.47178	6.63253	177.662	1.5704e-40	7.27213e-39	Tgm2							Tgm2	-1.89141	6.77903	151.095	9.98927e-35	1.41338e-32	Tgm2
	Tgtp2	1.08654	2.52053	15.2285	9.52527e-05	0.000343818	Tgtp2							Tgtp2	2.06313	3.19673	32.6274	1.11632e-08	1.27584e-07	Tgtp2
	Thy1	2.0762	1.19275	44.0588	3.18657e-11	2.72761e-10	Thy1							Thy1	1.52156	0.607521	10.979	0.000921489	0.00370297	Thy1
	Tigar	1.59482	3.9998	179.305	6.87205e-41	3.23247e-39	Tigar							Tigar	1.52591	3.92389	76.2469	2.5032e-18	9.67699e-17	Tigar
	Timp2	1.26626	9.94667	172.922	1.70177e-39	7.50744e-38	Timp2							Timp2	1.33516	10.0115	44.0499	3.20112e-11	5.4373e-10	Timp2
	Tll2	-1.00627	0.164868	8.18212	0.00423052	0.010577	Tll2							Tll2	-1.95175	-0.206606	19.4991	1.00648e-05	6.72997e-05	Tll2
	Tlr2	1.37039	8.01254	142.664	6.9631e-33	2.39232e-31	Tlr2							Tlr2	1.4746	8.08402	96.3552	9.60149e-23	5.73213e-21	Tlr2
	Tlr5	-1.39292	5.01611	89.8838	2.52571e-21	4.53746e-20	Tlr5							Tlr5	-1.40671	4.82338	89.7404	2.71556e-21	1.38709e-19	Tlr5
	Tmed3	1.32143	7.0324	227.327	2.28138e-51	1.52545e-49	Tmed3							Tmed3	1.29566	7.05418	110.687	6.92847e-26	5.53847e-24	Tmed3
	Tmem106a	1.26702	5.99295	142.594	7.21049e-33	2.47162e-31	Tmem106a							Tmem106a	1.29658	6.10122	57.2212	3.89458e-14	9.55017e-13	Tmem106a
	Tmem119	-1.21664	10.937	129.76	4.62357e-30	1.3816e-28	Tmem119							Tmem119	-1.21597	10.9016	26.3237	2.88729e-07	2.62546e-06	Tmem119
	Tmem132a	1.06053	6.34896	151.3	9.00976e-35	3.30898e-33	Tmem132a							Tmem132a	1.18359	6.42444	77.9614	1.05074e-18	4.2477e-17	Tmem132a
	Tmem151a	2.51152	2.19063	29.8639	4.63468e-08	2.77541e-07	Tmem151a							Tmem151a	1.70896	2.13784	16.9556	3.8264e-05	0.000226716	Tmem151a
	Tmem154	2.2299	4.38009	297.305	1.27327e-66	1.30039e-64	Tmem154							Tmem154	1.89709	4.37209	167.444	2.67638e-38	4.56242e-36	Tmem154
	Tmem163	7.32715	3.99357	823.237	4.78731e-181	2.23074e-178	Tmem163							Tmem163	6.78064	3.77421	376.989	5.62898e-84	4.97778e-81	Tmem163
	Tmem178	6.56469	2.63005	309.277	3.13861e-69	3.41604e-67	Tmem178							Tmem178	5.0753	2.52462	125.138	4.74854e-29	4.63359e-27	Tmem178
	Tmem202	2.39824	0.552418	37.5802	8.77288e-10	6.39669e-09	Tmem202							Tmem202	2.38259	0.641824	30.0401	4.23212e-08	4.42574e-07	Tmem202
	Tmem204	-2.13408	4.56475	188.218	7.78685e-43	3.93592e-41	Tmem204							Tmem204	-2.14701	4.52315	105.358	1.01954e-24	7.55261e-23	Tmem204
	Tmem205	2.66116	3.5179	184.551	4.91782e-42	2.42012e-40	Tmem205							Tmem205	2.24823	3.40427	88.502	5.07842e-21	2.52121e-19	Tmem205
	Tmem238	1.37322	1.09473	19.8034	8.58293e-06	3.74649e-05	Tmem238							Tmem238	1.00627	1.12304	7.4605	0.00630673	0.0193696	Tmem238
	Tmem254a	1.01491	4.42106	30.5835	3.19808e-08	1.95277e-07	Tmem254a							Tmem254a	1.15561	4.26262	41.6003	1.11978e-10	1.74876e-09	Tmem254a
	Tmem44	-2.53189	5.44229	314.499	2.28699e-70	2.62318e-68	Tmem44							Tmem44	-2.80974	5.23454	156	8.46468e-36	1.27412e-33	Tmem44
	Tmem51	3.78484	3.489	355.083	3.31388e-79	4.58016e-77	Tmem51							Tmem51	3.2449	3.65768	68.1222	1.53672e-16	5.05652e-15	Tmem51
	Tmem52	-1.78785	2.8865	57.1557	4.0264e-14	4.50395e-13	Tmem52							Tmem52	-1.84092	2.85645	38.3669	5.86169e-10	8.21972e-09	Tmem52
	Tmem82	1.06887	0.721226	9.34334	0.00223797	0.00600619	Tmem82							Tmem82	1.07677	0.404464	9.3033	0.00228741	0.00819771	Tmem82
	Tnf	1.62127	5.06657	26.7464	2.31979e-07	1.26659e-06	Tnf							Tnf	1.49352	5.18837	15.6789	7.50582e-05	0.000407677	Tnf
	Tnfsf8	2.49298	5.28334	449.582	8.89439e-100	1.70031e-97	Tnfsf8							Tnfsf8	2.42487	5.40474	260.295	1.47971e-58	5.98183e-56	Tnfsf8
	Tnik	1.4593	0.574089	14.3072	0.00015527	0.000539177	Tnik							Tnik	1.32091	0.666954	12.6645	0.000372659	0.00167797	Tnik
	Tomm7	1.20704	4.48529	46.1772	1.08024e-11	9.61069e-11	Tomm7							Tomm7	1.04799	4.42039	23.2637	1.41244e-06	1.12716e-05	Tomm7
	Tox2	3.06475	2.22817	113.465	1.70683e-26	4.17221e-25	Tox2							Tox2	2.70655	2.16861	54.5452	1.51914e-13	3.46682e-12	Tox2
	Tpd52	1.26642	7.63407	175.735	4.13631e-40	1.89774e-38	Tpd52							Tpd52	1.23724	7.68888	61.4944	4.43996e-15	1.21746e-13	Tpd52
	Tpi1	2.03798	7.45343	286.634	2.69216e-64	2.62371e-62	Tpi1							Tpi1	1.71	7.65432	72.574	1.60885e-17	5.83681e-16	Tpi1
	Tpi-rs11	2.0815	-0.118504	19.6747	9.18102e-06	3.99004e-05	Tpi-rs11							Tpi-rs11	1.91274	0.169273	22.091	2.60021e-06	1.97162e-05	Tpi-rs11
	Tppp	-1.3884	6.2771	142.23	8.66287e-33	2.9546e-31	Tppp							Tppp	-1.35375	6.22041	77.6391	1.23694e-18	4.92761e-17	Tppp
	Trem2	1.24443	10.9812	145.259	1.88524e-33	6.64559e-32	Trem2							Trem2	1.28946	10.9565	29.3741	5.96695e-08	6.07821e-07	Trem2
	Treml1	-1.0795	2.6117	31.082	2.47353e-08	1.53231e-07	Treml1							Treml1	-1.38408	2.34059	16.4018	5.12363e-05	0.000290675	Treml1
	Treml2	2.19392	5.39701	321.471	6.9253e-72	8.39537e-70	Treml2							Treml2	2.17159	5.59473	195.957	1.59298e-44	4.02483e-42	Treml2
	Trerf1	1.52805	2.52991	54.7243	1.3868e-13	1.47178e-12	Trerf1							Trerf1	1.27988	2.38714	17.9637	2.25157e-05	0.000139055	Trerf1
	Trib3	2.411	0.757184	37.1888	1.0723e-09	7.73914e-09	Trib3							Trib3	2.09872	0.730636	21.8722	2.91433e-06	2.18058e-05	Trib3
	Trim16	-1.45606	1.2165	26.7771	2.28324e-07	1.248e-06	Trim16							Trim16	-1.80495	1.03745	29.3579	6.01694e-08	6.12033e-07	Trim16
	Trim72	1.1021	1.46968	13.2234	0.000276474	0.000914485	Trim72							Trim72	1.6452	1.18302	25.4181	4.61559e-07	4.04622e-06	Trim72
	TrnC	1.0779	1.29307	8.1559	0.00429212	0.0107005	TrnC							TrnC	1.1432	1.48581	11.6038	0.000658185	0.0027536	TrnC
	Trp53cor1	-1.72399	2.13615	58.9587	1.61016e-14	1.87279e-13	Trp53cor1							Trp53cor1	-1.89829	1.94128	29.5138	5.55195e-08	5.68412e-07	Trp53cor1
	Trp53i11	-1.34248	5.01674	129.978	4.14322e-30	1.24556e-28	Trp53i11							Trp53i11	-1.52603	4.87081	118.049	1.69126e-27	1.50501e-25	Trp53i11
	Trp53inp2	1.39952	5.29831	182.821	1.1733e-41	5.6987e-40	Trp53inp2							Trp53inp2	1.21874	5.05449	64.1628	1.14553e-15	3.36267e-14	Trp53inp2
	Trpc4	5.05386	2.04807	190.2	2.8746e-43	1.47804e-41	Trpc4							Trpc4	5.80853	2.14879	104.962	1.2452e-24	9.12866e-23	Trpc4
	Trpm1	6.9166	4.22857	991.766	1.10675e-217	9.16821e-215	Trpm1							Trpm1	8.32453	4.33761	605.315	1.16896e-133	4.13491e-130	Trpm1
	Trpm6	4.78968	2.17182	179.983	4.88735e-41	2.3135e-39	Trpm6							Trpm6	5.56302	2.35664	113.695	1.5198e-26	1.2724e-24	Trpm6
	Trps1	1.35009	3.81192	102.026	5.48046e-24	1.16909e-22	Trps1							Trps1	1.29973	3.95748	42.6147	6.66562e-11	1.07275e-09	Trps1
	Tsc22d1	1.82215	5.82149	235.114	4.57104e-53	3.27686e-51	Tsc22d1							Tsc22d1	1.76956	5.72346	108.898	1.70874e-25	1.31397e-23	Tsc22d1
	Tsc22d3	-1.16822	5.41496	63.0578	2.00729e-15	2.49422e-14	Tsc22d3							Tsc22d3	-1.31394	5.40374	28.5399	9.17862e-08	9.07535e-07	Tsc22d3
	Tsku	1.58714	0.193106	12.1334	0.000495275	0.00154878	Tsku							Tsku	1.21204	0.16499	7.10361	0.00769288	0.0229295	Tsku
	Tslp	-1.52582	0.760732	14.8215	0.000118179	0.000419762	Tslp							Tslp	-2.71567	0.453795	41.7191	1.05374e-10	1.65109e-09	Tslp
	Tspan17	1.50401	2.76799	51.9784	5.61135e-13	5.66108e-12	Tspan17							Tspan17	1.18344	2.99554	23.0741	1.5588e-06	1.23454e-05	Tspan17
	Tspan18	-2.10836	5.01434	359.416	3.77414e-80	5.4637e-78	Tspan18							Tspan18	-2.00242	4.94148	85.8461	1.94498e-20	9.14268e-19	Tspan18
	Tspan5	1.12943	4.34429	82.8303	8.94078e-20	1.46824e-18	Tspan5							Tspan5	1.13285	4.32279	51.1846	8.40777e-13	1.75201e-11	Tspan5
	Tspo	1.59006	5.8653	141.45	1.28301e-32	4.32828e-31	Tspo							Tspo	1.36531	5.96428	59.3629	1.3112e-14	3.39162e-13	Tspo
	Tstd1	-1.10826	2.96956	45.5637	1.47753e-11	1.29979e-10	Tstd1							Tstd1	-1.37471	2.65788	27.5586	1.52408e-07	1.45606e-06	Tstd1
	Ttc9	-1.17643	4.1243	87.0854	1.03935e-20	1.78545e-19	Ttc9							Ttc9	-1.04943	4.04375	42.3122	7.78074e-11	1.23975e-09	Ttc9
	Ttr	-1.34765	8.43867	12.7274	0.00036033	0.00115895	Ttr							Ttr	-2.21432	8.2772	22.5295	2.06942e-06	1.59565e-05	Ttr
	Ttyh2	2.04447	4.52859	317.747	4.48306e-71	5.22241e-69	Ttyh2							Ttyh2	1.78128	4.60811	99.365	2.10001e-23	1.30895e-21	Ttyh2
	Tuba4a	1.58239	3.30588	66.3498	3.77596e-16	4.86212e-15	Tuba4a							Tuba4a	1.33456	3.36217	27.5613	1.52191e-07	1.45497e-06	Tuba4a
	Txndc16	1.12754	6.31113	123.766	9.48034e-29	2.63243e-27	Txndc16							Txndc16	1.25255	6.41482	91.3026	1.23296e-21	6.50936e-20	Txndc16
	Tyrobp	1.76219	9.97269	194.38	3.51739e-44	1.87314e-42	Tyrobp							Tyrobp	1.69784	9.98768	61.0365	5.60255e-15	1.50762e-13	Tyrobp
	Uba52	1.54679	8.02007	170.847	4.83149e-39	2.09425e-37	Uba52							Uba52	1.42656	8.00157	76.5939	2.09985e-18	8.18477e-17	Uba52
	Ube2l6	1.33165	4.74538	116.861	3.07905e-27	7.82142e-26	Ube2l6							Ube2l6	1.53184	4.88269	68.9427	1.01369e-16	3.39873e-15	Ube2l6
	Uck2	2.13061	2.49819	82.0769	1.30894e-19	2.12379e-18	Uck2							Uck2	1.71195	2.58406	32.1678	1.41419e-08	1.58678e-07	Uck2
	Unc13a	1.29892	3.56547	58.8981	1.66054e-14	1.92838e-13	Unc13a							Unc13a	1.21687	3.50477	35.7907	2.19692e-09	2.82327e-08	Unc13a
	Unc5a	-1.10976	2.13906	28.1818	1.10441e-07	6.29984e-07	Unc5a							Unc5a	-1.18426	2.06171	16.6795	4.42556e-05	0.000256734	Unc5a
	Unc5cl	-1.18946	1.20545	16.8958	3.94896e-05	0.000153501	Unc5cl							Unc5cl	-1.82289	1.05569	16.5544	4.72746e-05	0.000271025	Unc5cl
	Unc79	-1.00905	1.91759	12.0503	0.000517844	0.00161168	Unc79							Unc79	-2.45217	1.17405	40.8934	1.60765e-10	2.4538e-09	Unc79
	Ung	1.5514	1.11115	17.3189	3.16022e-05	0.00012478	Ung							Ung	1.05995	0.876432	7.00739	0.00811738	0.0239526	Ung
	Upk1b	-1.60904	7.01985	235.842	3.17301e-53	2.29673e-51	Upk1b							Upk1b	-1.67942	6.95055	76.1797	2.58994e-18	9.9579e-17	Upk1b
	Uqcrh	1.30245	5.87912	112.863	2.31201e-26	5.5965e-25	Uqcrh							Uqcrh	1.09389	5.83924	55.9691	7.36184e-14	1.73028e-12	Uqcrh
	Usp12	1.4275	8.17035	264.515	1.77972e-59	1.55189e-57	Usp12							Usp12	1.39936	8.19445	123.27	1.21685e-28	1.15552e-26	Usp12
	Usp18	1.97024	4.39118	64.9475	7.69204e-16	9.72824e-15	Usp18							Usp18	2.22879	4.64341	95.095	1.81467e-22	1.05229e-20	Usp18
	Usp30	1.3143	5.74839	189.705	3.68835e-43	1.88993e-41	Usp30							Usp30	1.4464	5.78131	89.0781	3.79521e-21	1.9042e-19	Usp30
	Vat1	2.76265	6.32535	512.717	1.62613e-113	3.78863e-111	Vat1							Vat1	2.06169	6.34268	39.7814	2.84042e-10	4.20388e-09	Vat1
	Vipr1	-1.19075	4.25958	103.623	2.44727e-24	5.3272e-23	Vipr1							Vipr1	-1.07798	4.13291	27.4834	1.58446e-07	1.50764e-06	Vipr1
	Vkorc1	1.26509	5.93716	125.785	3.4263e-29	9.78727e-28	Vkorc1							Vkorc1	1.31966	5.95844	94.7603	2.14892e-22	1.23598e-20	Vkorc1
	Vps13c	1.19638	7.44786	169.128	1.14722e-38	4.94397e-37	Vps13c							Vps13c	1.45176	7.57092	163.172	2.29453e-37	3.73165e-35	Vps13c
	Vstm4	-1.5503	0.40312	17.9782	2.23445e-05	9.07597e-05	Vstm4							Vstm4	-1.14399	0.073874	8.63425	0.00329901	0.0111857	Vstm4
	Wfdc17	2.61908	3.89999	101.118	8.66456e-24	1.82482e-22	Wfdc17							Wfdc17	1.44861	4.24743	8.33457	0.00388976	0.0129132	Wfdc17
	Wif1	6.19188	0.975534	149.108	2.71541e-34	9.8755e-33	Wif1							Wif1	9.54807	1.31842	107.573	3.33373e-25	2.50899e-23	Wif1
	Wipf3	3.49945	2.70663	188.205	7.83579e-43	3.94728e-41	Wipf3							Wipf3	3.58377	2.67375	115.81	5.23161e-27	4.54123e-25	Wipf3
	Xylt1	3.59064	3.88647	421.943	9.21774e-94	1.61701e-91	Xylt1							Xylt1	3.67685	4.20872	195.308	2.20699e-44	5.47836e-42	Xylt1
	Ydjc	1.93207	2.0193	57.6551	3.12346e-14	3.531e-13	Ydjc							Ydjc	1.55186	1.73345	19.328	1.10081e-05	7.29868e-05	Ydjc
	Yipf7	8.14246	1.39311	185.419	3.17989e-42	1.57526e-40	Yipf7							Yipf7	7.79157	1.06525	109.206	1.46231e-25	1.1431e-23	Yipf7
	Zbp1	1.99187	4.018	45.9761	1.19702e-11	1.05991e-10	Zbp1							Zbp1	2.5523	4.50374	86.9369	1.12037e-20	5.35543e-19	Zbp1
	Zbtb16	2.98369	2.58761	136.045	1.95056e-31	6.18826e-30	Zbtb16							Zbtb16	3.3147	2.68161	128.399	9.17806e-30	9.61929e-28	Zbtb16
	Zbtb42	1.92236	1.81032	40.5153	1.95086e-10	1.54238e-09	Zbtb42							Zbtb42	1.22835	1.92451	9.72886	0.00181397	0.00666472	Zbtb42
	Zc2hc1a	1.21116	2.4764	43.3841	4.49822e-11	3.78515e-10	Zc2hc1a							Zc2hc1a	1.26917	2.46651	26.0275	3.36583e-07	3.01795e-06	Zc2hc1a
	Zc3h12d	2.43755	1.08455	52.4449	4.4249e-13	4.49453e-12	Zc3h12d							Zc3h12d	1.52356	1.31403	16.4783	4.9211e-05	0.000280647	Zc3h12d
	Zfand2a	1.47966	5.58792	270.606	8.37384e-61	7.66026e-59	Zfand2a							Zfand2a	1.40191	5.6683	96.126	1.07801e-22	6.35529e-21	Zfand2a
	Zfhx3	-1.07019	7.97115	98.544	3.17882e-23	6.50197e-22	Zfhx3							Zfhx3	-1.04252	7.94667	40.4706	1.996e-10	3.01724e-09	Zfhx3
	Zfp334	-1.18671	2.18336	32.1765	1.40787e-08	8.98659e-08	Zfp334							Zfp334	-1.34333	2.1199	20.2447	6.81425e-06	4.72751e-05	Zfp334
	Zfp385c	-1.10514	2.11126	20.6422	5.53611e-06	2.49317e-05	Zfp385c							Zfp385c	-1.2683	1.59807	13.7873	0.00020472	0.000990283	Zfp385c
	Zfp503	1.72281	1.88614	50.1844	1.39953e-12	1.36306e-11	Zfp503							Zfp503	1.35855	1.83916	18.7881	1.46079e-05	9.4941e-05	Zfp503
	Zfp618	2.86432	0.995746	54.0978	1.90754e-13	1.99883e-12	Zfp618							Zfp618	2.82319	0.652088	34.1307	5.15316e-09	6.22116e-08	Zfp618
	Zfp658	-1.05999	6.22455	134.325	4.63798e-31	1.43479e-29	Zfp658							Zfp658	-1.00558	6.12951	38.383	5.81373e-10	8.16057e-09	Zfp658
	Gm39847	-2.94024	-0.316351	28.1395	1.12881e-07	6.43168e-07	#N/A							Ctsk	-5.11352	2.88767	20.3395	6.48492e-06	4.52888e-05	#N/A	571
	Ccr7	-2.55133	-0.543519	15.3244	9.05402e-05	0.000328478	#N/A							Retnla	-4.11479	-0.361401	29.7924	4.80874e-08	4.98453e-07	#N/A
	4930453L07Rik	-2.34903	-0.487214	18.3997	1.79088e-05	7.39923e-05	#N/A							Pdpn	-3.76386	1.76454	14.9198	0.000112177	0.000584169	#N/A
	Gm9522	-2.08823	1.39546	8.20233	0.00418365	0.010487	#N/A							Acp5	-3.20009	2.32095	10.1577	0.00143702	0.00544665	#N/A
	Efna4	-2.00336	-0.0321905	24.2806	8.32737e-07	4.2077e-06	#N/A							Emb	-3.19262	2.73108	38.4185	5.70881e-10	8.04437e-09	#N/A
	Gm11655	-1.92815	-0.225305	18.1566	2.03467e-05	8.2984e-05	#N/A							Anxa1	-3.16921	2.92851	14.9543	0.000110146	0.00057423	#N/A
	Gm21761	-1.92165	0.404225	26.0079	3.40015e-07	1.81394e-06	#N/A							Clec4n	-2.8143	2.68016	15.1938	9.7023e-05	0.000514342	#N/A
	Clec4a4	-1.90854	-0.348468	15.5494	8.03778e-05	0.000294258	#N/A							Cxcr2	-2.75178	1.73016	11.7649	0.000603569	0.00255762	#N/A
	Gck	-1.8786	-0.175429	9.83462	0.00171258	0.00471752	#N/A							S100a4	-2.75141	1.70888	25.4881	4.45109e-07	3.9117e-06	#N/A
	Gm51695	-1.85925	0.320062	23.0315	1.59367e-06	7.74297e-06	#N/A							Emp1	-2.69825	2.19113	7.84253	0.00510313	0.0161675	#N/A
	Gm8817	-1.79125	0.124468	19.2772	1.1305e-05	4.82175e-05	#N/A							Gm3227	-2.59835	-0.554328	26.0741	3.2856e-07	2.94974e-06	#N/A
	Gm21103	-1.78326	0.534431	27.6122	1.48238e-07	8.34732e-07	#N/A							Gda	-2.58217	2.36054	14.5738	0.000134776	0.000685458	#N/A
	Dcaf12l1	-1.6659	-0.3001	11.5724	0.000669369	0.00203776	#N/A							Cd24a	-2.58164	1.96201	14.9915	0.000107996	0.000564315	#N/A
	Gm32017	-1.65506	-0.249919	13.1011	0.000295129	0.000968262	#N/A							Rara	-2.55257	1.24321	23.2714	1.40677e-06	1.12343e-05	#N/A
	Gm31095	-1.64692	-0.160984	9.35956	0.00221826	0.00596934	#N/A							Dpep2	-2.55133	0.995547	14.6557	0.000129042	0.000661526	#N/A
	Gm23369	-1.64077	-0.281135	13.5869	0.000227776	0.000764775	#N/A							Krt80	-2.54663	0.964873	22.4017	2.21183e-06	1.69438e-05	#N/A
	Vsnl1	-1.6343	-0.18741	11.42	0.000726572	0.00219044	#N/A							Cd36	-2.54272	4.42242	14.9487	0.000110477	0.000575739	#N/A
	Gm12977	-1.61207	1.55262	30.5054	3.32942e-08	2.02798e-07	#N/A							Ifitm1	-2.5412	1.04258	8.00991	0.0046522	0.0149668	#N/A
	Gm40773	-1.59779	-0.126297	15.6604	7.57959e-05	0.000279267	#N/A							Steap2	-2.4788	1.20948	22.0851	2.60823e-06	1.97664e-05	#N/A
	Rnf152	-1.49991	-0.0866227	7.80791	0.0052018	0.0126863	#N/A							Hp	-2.47144	2.20858	15.9606	6.4675e-05	0.000356759	#N/A
	Gm42074	-1.46928	0.160432	15.6917	7.45517e-05	0.00027509	#N/A							Sod3	-2.37575	0.262209	22.0975	2.59151e-06	1.96713e-05	#N/A
	Gm15774	-1.46362	3.09769	46.1097	1.11811e-11	9.93572e-11	#N/A							Sell	-2.37038	0.969568	12.9038	0.000327919	0.00150153	#N/A
	Gfra2	-1.46277	-0.452635	5.97384	0.0145196	0.0315692	#N/A							Miat	-2.36928	0.153308	15.9853	6.38364e-05	0.000353097	#N/A
	Gm34105	-1.45979	-0.272561	11.8982	0.000561883	0.00173462	#N/A							Mmp8	-2.35936	1.50318	9.46336	0.00209617	0.00757953	#N/A
	3300005D01Rik	-1.45539	-0.0294169	11.6431	0.000644409	0.00196619	#N/A							Ccr1	-2.32559	3.8861	24.373	7.93737e-07	6.66108e-06	#N/A
	Cracdl	-1.4491	0.791384	17.3025	3.1877e-05	0.000125745	#N/A							S100a6	-2.28857	2.46491	15.1169	0.000101053	0.000533908	#N/A
	Scn11a	-1.4417	0.0199799	12.423	0.000424079	0.00134656	#N/A							Treml4	-2.26308	0.45556	20.1028	7.33874e-06	5.0553e-05	#N/A
	Gm15612	-1.43805	-0.0628931	11.0371	0.000893062	0.00263953	#N/A							Hif3a	-2.21654	-0.371328	21.009	4.57129e-06	3.30672e-05	#N/A
	Gm47112	-1.42746	-0.252464	10.3661	0.0012835	0.00364955	#N/A							Zfp57	-2.21566	1.1146	30.1243	4.05221e-08	4.25016e-07	#N/A
	Gm52117	-1.42351	-0.0837203	10.3542	0.00129178	0.00366959	#N/A							Hbb-bt	-2.20619	0.912603	12.5091	0.000404972	0.00180301	#N/A
	Steap1	-1.42179	-0.00415867	7.08514	0.0077726	0.0181657	#N/A							Hpca	-2.1951	-0.191411	18.526	1.67606e-05	0.00010716	#N/A
	Gm35117	-1.41885	1.50802	23.4642	1.2726e-06	6.27297e-06	#N/A							Pilrb2	-2.19051	0.50772	17.938	2.28214e-05	0.000140697	#N/A
	LOC118567681	-1.41031	-0.220027	8.86213	0.00291148	0.00759501	#N/A							Anpep	-2.18281	2.83468	7.16502	0.0074339	0.0222749	#N/A
	Gm40128	-1.40949	-0.0199795	9.51843	0.00203419	0.00551888	#N/A							Gm3764	-2.15579	1.89963	17.483	2.89886e-05	0.000175432	#N/A
	Gm41055	-1.40336	-0.220125	11.1928	0.000821149	0.00244443	#N/A							Kcnk1	-2.14846	0.782244	12.9346	0.000322558	0.00147985	#N/A
	Gm15575	-1.39809	0.444121	14.0345	0.000179485	0.000615382	#N/A							Hbb-bs	-2.14088	3.89731	12.5867	0.000388499	0.00173952	#N/A
	Spats2l	-1.39419	-0.153731	11.2233	0.000807772	0.00240718	#N/A							Gpr37l1	-2.12335	1.61806	24.2344	8.52967e-07	7.13276e-06	#N/A
	Tmem262	-1.38502	-0.173863	9.39457	0.0021763	0.00587132	#N/A							Qrfp	-2.12181	-0.401109	16.8351	4.07726e-05	0.000238681	#N/A
	2500004C02Rik	-1.37178	2.61687	30.5953	3.17859e-08	1.94166e-07	#N/A							Atp8b4	-2.11628	1.29485	13.2481	0.000272858	0.00127735	#N/A
	Cfhr2	-1.34943	0.490077	12.4672	0.000414159	0.00131843	#N/A							Sgms2	-2.08541	1.3326	17.4011	3.02657e-05	0.000181916	#N/A
	Gm41662	-1.3371	0.792084	20.3437	6.47052e-06	2.87148e-05	#N/A							Dnah6	-2.07612	0.174011	8.70549	0.00317253	0.0108242	#N/A
	Gm30639	-1.33084	-0.132409	8.81565	0.00298658	0.00776645	#N/A							Mmp9	-2.04279	2.91321	18.3983	1.79218e-05	0.000113762	#N/A
	Nr6a1os	-1.32987	2.78185	47.6598	5.06983e-12	4.65494e-11	#N/A							Cecr2	-2.02527	0.330403	27.6836	1.42872e-07	1.3705e-06	#N/A
	Gm4925	-1.32319	-0.272881	8.66461	0.0032445	0.00835989	#N/A							Slc7a10	-2.01101	1.43206	10.2521	0.00136526	0.00520677	#N/A
	Pde10a	-1.32141	1.6703	20.2316	6.86088e-06	3.03388e-05	#N/A							Scube3	-2.00117	0.483086	21.2083	4.11978e-06	3.00004e-05	#N/A
	Gm34336	-1.29896	0.119548	7.09872	0.00771391	0.0180342	#N/A							Sfrp1	-1.97501	0.0184114	10.6618	0.00109372	0.00430057	#N/A
	Rgs4	-1.29758	1.23094	7.74087	0.00539848	0.0131252	#N/A							Il2ra	-1.97144	-0.203046	10.9798	0.000921088	0.00370267	#N/A
	Gm29975	-1.28796	0.436341	11.687	0.000629389	0.00192628	#N/A							Enpp2	-1.94903	7.26856	17.8411	2.40145e-05	0.000147474	#N/A
	Tnfrsf25	-1.28104	0.485848	14.434	0.000145159	0.000507854	#N/A							Crhr2	-1.94387	-0.30283	16.8537	4.03746e-05	0.000236869	#N/A
	Ak5	-1.27275	-0.197169	7.01951	0.00806263	0.0187466	#N/A							Gprc5c	-1.94358	0.520866	18.5972	1.61454e-05	0.000103555	#N/A
	4930521O11Rik	-1.26592	-0.251215	7.59854	0.00584156	0.0140671	#N/A							Clic6	-1.91923	3.11269	14.5258	0.000138254	0.00070239	#N/A
	Xlr4a	-1.23449	1.76275	7.18059	0.00736966	0.017319	#N/A							Pcdh7	-1.89779	0.0225501	16.8519	4.04122e-05	0.000236963	#N/A
	Gm26641	-1.23139	-0.140877	6.68792	0.00970682	0.0220941	#N/A							E130215H24Rik	-1.8893	0.222606	18.7787	1.46796e-05	9.53197e-05	#N/A
	LOC118567660	-1.22489	0.522595	10.2298	0.00138189	0.0038944	#N/A							Krt10	-1.88228	0.936201	11.0309	0.000896077	0.00361625	#N/A
	Gm21992	-1.22314	0.0253344	8.92467	0.00281344	0.00736632	#N/A							Kcne2	-1.88066	1.34693	10.572	0.00114815	0.00447157	#N/A
	LOC115487911	-1.22009	-0.0222858	6.53683	0.0105664	0.0238179	#N/A							Gm42372	-1.87901	-0.243797	16.7205	4.33107e-05	0.000251871	#N/A
	4933431G14Rik	-1.21867	1.86759	12.9456	0.00032067	0.0010424	#N/A							Hba-a1	-1.87785	3.65321	13.9988	0.000182931	0.000897777	#N/A
	Dnase1l2	-1.21397	2.76213	31.5009	1.99352e-08	1.25107e-07	#N/A							Mgst1	-1.87359	1.02035	7.97184	0.00475105	0.0152088	#N/A
	Gm38565	-1.20653	1.32715	15.5235	8.14843e-05	0.000298162	#N/A							Sh3d19	-1.87357	1.41871	18.8763	1.39473e-05	9.08565e-05	#N/A
	Gm13710	-1.20225	1.37282	7.02155	0.00805345	0.0187282	#N/A							Ltf	-1.87099	3.42268	8.47408	0.00360242	0.0120584	#N/A
	Gm24105	-1.20027	-0.0642366	8.58269	0.00339373	0.00870979	#N/A							Cacnb3	-1.85912	0.706495	9.00839	0.00268744	0.00940736	#N/A
	Gm13291	-1.19955	2.87915	24.0879	9.20343e-07	4.6144e-06	#N/A							Sox17	-1.83346	1.01147	8.74989	0.0030962	0.0105894	#N/A
	Gm4325	-1.19927	-0.206675	5.22231	0.0222989	0.045843	#N/A							Adgre5	-1.828	3.10562	14.0404	0.000178922	0.000880029	#N/A
	Casp12	-1.19571	1.57254	18.2963	1.89079e-05	7.7647e-05	#N/A							Gm34655	-1.82799	0.168401	18.2884	1.89857e-05	0.000119657	#N/A
	Phtf1os	-1.19069	0.267784	8.94764	0.00277829	0.00728635	#N/A							Vat1l	-1.81548	2.2468	9.67064	0.00187236	0.00684904	#N/A
	LOC118567509	-1.18045	0.707728	14.1537	0.000168467	0.000580275	#N/A							S100a9	-1.81515	4.43633	16.1145	5.96249e-05	0.000332401	#N/A
	LOC118568020	-1.17564	0.146205	8.73045	0.00312939	0.0080997	#N/A							Tlcd5	-1.80855	0.0372085	15.8608	6.81747e-05	0.000374168	#N/A
	Gm14230	-1.174	2.31359	31.2626	2.25384e-08	1.40497e-07	#N/A							Gja1	-1.80092	1.47049	13.9287	0.000189875	0.000927672	#N/A
	Xlr4c	-1.17239	0.754752	5.73883	0.0165938	0.0354877	#N/A							Gm13868	-1.79751	-0.0469458	15.9763	6.41399e-05	0.000354367	#N/A
	Slc15a2	-1.16944	3.40238	6.09559	0.013552	0.0296992	#N/A							Car12	-1.79626	2.27689	10.347	0.00129686	0.00498079	#N/A
	Tmem181c-ps	-1.16673	1.93365	27.8883	1.28527e-07	7.27865e-07	#N/A							Tctn2	-1.7782	0.392354	18.2373	1.95022e-05	0.000122638	#N/A
	Gm35060	-1.16646	2.40608	27.3807	1.67092e-07	9.34551e-07	#N/A							Htra1	-1.77209	1.71907	18.092	2.10478e-05	0.00013154	#N/A
	Gm33864	-1.16342	3.0124	43.7326	3.76455e-11	3.19665e-10	#N/A							Gm34346	-1.74838	0.491798	17.7044	2.58026e-05	0.000157635	#N/A
	Xlr4b	-1.15433	2.51174	15.3024	9.16011e-05	0.000331923	#N/A							Col8a2	-1.74474	1.30361	14.2314	0.000161655	0.000806507	#N/A
	Kcnab1	-1.1459	0.243643	7.87433	0.00501414	0.0122829	#N/A							Gria2	-1.73218	0.298177	12.8975	0.000329029	0.00150564	#N/A
	Fgfbp3	-1.14272	1.82879	12.9538	0.000319269	0.00103876	#N/A							Dsp	-1.72729	0.800141	9.29476	0.00229811	0.00823187	#N/A
	Gm4598	-1.14162	0.0833443	8.99208	0.00271152	0.00713078	#N/A							Npr3	-1.72582	0.47243	11.6306	0.000648758	0.00272139	#N/A
	Gm15850	-1.13935	1.49433	17.4629	2.92972e-05	0.000116307	#N/A							Ovol1	-1.71431	1.49977	27.3997	1.65456e-07	1.568e-06	#N/A
	Tbx6	-1.13486	3.91086	38.6472	5.07759e-10	3.82577e-09	#N/A							Tmem53	-1.70544	-0.0309044	15.1776	9.78595e-05	0.000518194	#N/A
	Mmp23	-1.12315	2.85635	30.4607	3.40706e-08	2.07104e-07	#N/A							Lrrk2	-1.7025	1.37319	13.4632	0.000243289	0.00115591	#N/A
	Olfr1029	-1.12102	0.355343	9.77657	0.0017675	0.00485183	#N/A							Vldlr	-1.69549	0.478539	8.90587	0.00284256	0.00986736	#N/A
	Gm31560	-1.11572	-0.254419	5.31653	0.0211241	0.0436745	#N/A							Gm33858	-1.6929	5.65162	38.1154	6.66817e-10	9.28622e-09	#N/A
	Pcdhgb8	-1.11541	1.60709	17.6742	2.62158e-05	0.000104828	#N/A							Epha2	-1.69136	5.44282	91.9523	8.87901e-22	4.74072e-20	#N/A
	Fbxo24	-1.11412	1.58187	19.4411	1.03752e-05	4.46479e-05	#N/A							Stard13	-1.68916	0.834261	14.417	0.000146475	0.000738325	#N/A
	Ankrd24	-1.11352	4.30442	72.817	1.42247e-17	2.00667e-16	#N/A							Fgfr3	-1.68567	1.58741	14.1602	0.000167881	0.000833746	#N/A
	Gm2956	-1.11277	3.1087	50.8536	9.9518e-13	9.83375e-12	#N/A							Sntb1	-1.68457	-0.139624	10.4417	0.00123199	0.00475619	#N/A
	Doc2g	-1.11195	1.94484	18.2686	1.91841e-05	7.86946e-05	#N/A							Pla2g7	-1.66497	3.87434	12.775	0.000351277	0.00159353	#N/A
	Cpsf4l	-1.10961	1.74513	14.3658	0.000150509	0.000524356	#N/A							Gm3317	-1.66029	1.26973	12.4487	0.000418277	0.00185117	#N/A
	Tmem72	-1.10382	1.34106	6.38678	0.0114973	0.0256911	#N/A							Sema3b	-1.65678	0.792158	12.7925	0.000348012	0.00158075	#N/A
	Srp54b	-1.10327	2.94585	9.87571	0.00167475	0.00462106	#N/A							Nfe2	-1.65615	-0.0904623	10.9448	0.000938687	0.00376246	#N/A
	Cd59a	-1.09616	0.704329	6.32151	0.0119282	0.0265266	#N/A							Hes1	-1.64706	3.20784	45.2602	1.72517e-11	3.00608e-10	#N/A
	Ttll3	-1.09596	5.5364	47.7423	4.86089e-12	4.46861e-11	#N/A							Klhdc7a	-1.64395	0.541541	11.3411	0.000758104	0.00312632	#N/A
	1700040D17Rik	-1.08606	0.161984	8.31605	0.00392963	0.00991617	#N/A							Sdc2	-1.64283	0.74376	13.8328	0.000199822	0.000969242	#N/A
	Zfp69	-1.08175	5.6626	61.2092	5.13223e-15	6.21663e-14	#N/A							Fbn1	-1.63888	-0.189428	10.1024	0.00148074	0.00558844	#N/A
	Zfr2	-1.08088	1.8342	17.0869	3.57082e-05	0.000139639	#N/A							Prr22	-1.63132	0.0346758	12.113	0.00050072	0.00216693	#N/A
	Gm22573	-1.07196	-0.0666588	5.7227	0.0167469	0.0357449	#N/A							Gm21188	-1.6215	-0.175991	6.6369	0.00998876	0.0286385	#N/A
	Gm7285	-1.06384	2.16194	19.2972	1.1187e-05	4.77744e-05	#N/A							Iho1	-1.61024	1.88437	18.9682	1.32913e-05	8.69834e-05	#N/A
	Pnp	-1.06366	7.05044	145.559	1.62053e-33	5.73959e-32	#N/A							Trpm3	-1.60852	4.00249	9.30633	0.00228363	0.00818625	#N/A
	Sigirr	-1.06247	0.316767	7.73957	0.00540236	0.0131325	#N/A							Kcnc3	-1.60666	0.383639	16.5734	4.68018e-05	0.00026875	#N/A
	Rac3	-1.06071	3.19568	45.1331	1.84089e-11	1.60336e-10	#N/A							Pf4	-1.60658	3.57376	22.1045	2.58209e-06	1.96208e-05	#N/A
	6030468B19Rik	-1.05814	3.86091	35.392	2.69598e-09	1.86369e-08	#N/A							LOC118568291	-1.60336	0.155368	13.9659	0.000186155	0.000912335	#N/A
	Rap1gap2	-1.05802	5.67849	147.119	7.39067e-34	2.64274e-32	#N/A							Slc6a1	-1.59722	1.75382	9.22973	0.00238117	0.00847248	#N/A
	Ccl7	-1.0565	1.47095	14.2561	0.000159541	0.000552338	#N/A							Csrp2	-1.59568	-0.116864	11.2514	0.000795621	0.00326202	#N/A
	Slc2a5	-1.05624	8.83884	140.501	2.06858e-32	6.90037e-31	#N/A							Gm20337	-1.59462	-0.157172	12.3124	0.000449969	0.00197415	#N/A
	Timd4	-1.05471	0.413319	7.0977	0.00771828	0.0180416	#N/A							Gm8339	-1.58934	-0.400932	7.88774	0.00497711	0.0158356	#N/A
	Marchf10	-1.05021	2.38205	21.8013	3.02392e-06	1.41569e-05	#N/A							Tgfbr3	-1.58899	0.865324	14.893	0.000113784	0.000591235	#N/A
	Cspg4b	-1.0489	0.263414	5.64446	0.0175106	0.0371252	#N/A							Gm31940	-1.5846	0.148985	11.317	0.000768005	0.00315887	#N/A
	Slc16a9	-1.04855	1.89482	17.8348	2.4094e-05	9.69941e-05	#N/A							Pglyrp1	-1.57992	0.866401	11.3091	0.000771267	0.00316952	#N/A
	3110056K07Rik	-1.04599	3.4619	30.1035	4.09585e-08	2.4676e-07	#N/A							Abca4	-1.57851	1.59578	8.10913	0.00440429	0.014305	#N/A
	Gm33387	-1.04582	0.8746	9.93454	0.00162206	0.0044898	#N/A							LOC115487644	-1.57757	0.0380431	14.4288	0.000145561	0.000733977	#N/A
	Gm36685	-1.04549	1.41164	17.0107	3.71706e-05	0.000144978	#N/A							Cfap65	-1.57743	0.0477013	6.01998	0.0141448	0.0382083	#N/A
	Gm41665	-1.04254	0.238545	7.2123	0.00724056	0.0170559	#N/A							Ahnak	-1.57692	4.81821	16.0753	6.08743e-05	0.000338699	#N/A
	Gm2921	-1.04114	0.294678	8.13658	0.00433811	0.0108007	#N/A							Col4a4	-1.57383	0.159998	7.91975	0.0048898	0.0155894	#N/A
	Txnip	-1.03963	8.64282	122.57	1.73167e-28	4.71184e-27	#N/A							9930012K11Rik	-1.56986	1.64307	26.0354	3.35212e-07	3.00755e-06	#N/A
	9330136K24Rik	-1.03587	0.461899	7.18435	0.00735424	0.0172855	#N/A							Lcat	-1.56478	-0.0924485	14.0375	0.0001792	0.000880994	#N/A
	Btbd3	-1.02939	4.81217	77.2099	1.53723e-18	2.32471e-17	#N/A							Gm39715	-1.56459	-0.310847	12.5303	0.000400397	0.00178622	#N/A
	Trim15	-1.02696	0.922893	11.6641	0.000637179	0.00194612	#N/A							Sirpb1a	-1.56422	-0.13503	5.97013	0.0145502	0.039087	#N/A
	LOC118567382	-1.02483	2.19074	14.3189	0.000154306	0.000536207	#N/A							Sox13	-1.56352	1.76295	17.7935	2.4622e-05	0.000150943	#N/A
	4930568A12Rik	-1.0247	0.970825	11.4372	0.000719876	0.00217333	#N/A							Gm52823	-1.56305	-0.132301	12.6806	0.000369477	0.00166541	#N/A
	Adgrg1	-1.01924	9.55856	166.897	3.52293e-38	1.48812e-36	#N/A							Alpl	-1.56298	1.12027	7.09779	0.0077179	0.0229799	#N/A
	Clec4e	-1.01837	0.1593	6.59454	0.0102292	0.0231278	#N/A							Mcemp1	-1.56242	0.906189	6.1415	0.0132046	0.0361096	#N/A
	Inka1	-1.01784	5.31991	91.3685	1.19257e-21	2.17922e-20	#N/A							Rasgrp2	-1.56157	1.7784	16.8638	4.01606e-05	0.000235977	#N/A
	Gm46162	-1.01726	8.08053	92.6275	6.31253e-22	1.18398e-20	#N/A							S100a8	-1.56039	3.68867	8.87461	0.00289164	0.0100058	#N/A
	Zfp691	-1.01533	6.30651	143.362	4.89911e-33	1.69885e-31	#N/A							Cgnl1	-1.559	2.57759	15.845	6.87483e-05	0.000376585	#N/A
	Gm32849	-1.01328	5.60348	66.935	2.80602e-16	3.65101e-15	#N/A							Cyp2d22	-1.55531	1.24047	22.5017	2.09953e-06	1.6171e-05	#N/A
	Dapp1	-1.01028	6.7529	106.58	5.50362e-25	1.23964e-23	#N/A							Frem1	-1.5513	0.446282	7.27062	0.00700918	0.0211817	#N/A
	Mkrn3	-1.0062	1.19639	9.26829	0.00233155	0.00623138	#N/A							Prlr	-1.54889	2.90385	7.67264	0.00560643	0.0175072	#N/A
	Sapcd1	-1.00505	0.761166	8.56487	0.00342711	0.00878336	#N/A							Rnd3	-1.54869	0.446325	12.3254	0.000446825	0.00196278	#N/A
	Gm51749	-1.00418	-0.135108	6.46835	0.0109812	0.024645	#N/A							Ntn4	-1.54604	0.453238	6.94452	0.00840765	0.0246345	#N/A
	LOC118568402	-1.00396	5.66564	71.7702	2.41781e-17	3.36935e-16	#N/A							Omg	-1.54505	0.00522922	10.624	0.00111632	0.00437528	#N/A
	Tmc7	-1.00375	5.38803	103.746	2.3002e-24	5.02907e-23	#N/A							Ppp1r1b	-1.54052	2.08528	9.70164	0.00184104	0.00674666	#N/A
	Gm51644	-1.00266	3.04198	24.5488	7.24505e-07	3.6921e-06	#N/A							4930445E18Rik	-1.5382	1.00478	19.9022	8.15071e-06	5.56048e-05	#N/A
	Gm35816	-1.00243	2.09105	16.4935	4.8817e-05	0.000186883	#N/A							1110006O24Rik	-1.53049	0.641132	16.1375	5.89068e-05	0.000329305	#N/A
	Trmt10a	-1.00086	3.80992	42.918	5.70826e-11	4.77375e-10	#N/A							Slc38a11	-1.53047	0.685599	5.90448	0.0151024	0.0403177	#N/A
	Plxna4	-1.00029	6.62252	108.142	2.5018e-25	5.76573e-24	#N/A							Ryr1	-1.52973	-0.37091	8.9505	0.00277393	0.0096647	#N/A
	Kif11	1.0005	2.09494	16.8813	3.97928e-05	0.0+A1:G134301545516	#N/A							Mapk11	-1.52973	-0.101262	13.3627	0.000256685	0.0012093	#N/A
	Kcnma1	1.00097	5.27721	89.8367	2.58657e-21	4.64119e-20	#N/A							Plac8	-1.52101	1.69912	10.6757	0.00108553	0.0042712	#N/A
	Impdh1	1.00193	2.96967	21.6891	3.20607e-06	1.49486e-05	#N/A							Syn1	-1.52065	-0.0241215	13.9145	0.000191314	0.00093406	#N/A
	Hmgcs1	1.00195	5.57986	108.542	2.0442e-25	4.74045e-24	#N/A							Gm29941	-1.51947	2.28244	22.2063	2.44863e-06	1.86467e-05	#N/A
	Shcbp1	1.003	-0.0243521	5.50589	0.0189525	0.0397966	#N/A							Myrip	-1.51854	0.843542	12.2437	0.00046682	0.00203232	#N/A
	Itprip	1.0061	4.09567	55.3464	1.01055e-13	1.0864e-12	#N/A							L3mbtl1	-1.51652	0.138296	10.7324	0.00105273	0.00415601	#N/A
	Ptges3l	1.00762	0.296198	7.4037	0.00650898	0.0154868	#N/A							Dancr	-1.51376	1.03889	16.586	4.6493e-05	0.000267411	#N/A
	Tmem120b	1.00866	3.67536	60.321	8.05812e-15	9.63252e-14	#N/A							Ccdc80	-1.51328	0.593945	16.0301	6.23422e-05	0.000346049	#N/A
	Fam162a	1.01024	3.6739	49.0796	2.45781e-12	2.33727e-11	#N/A							Ahr	-1.51316	1.08911	13.0558	0.000302348	0.00139756	#N/A
	Spc25	1.01298	0.350798	8.19975	0.00418961	0.0104943	#N/A							Zfp507	-1.51196	0.721449	14.7193	0.000124765	0.000641461	#N/A
	Akr1a1	1.01349	8.54176	95.7008	1.33628e-22	2.62175e-21	#N/A							Trim9	-1.5082	0.317916	13.5677	0.000230108	0.00109845	#N/A
	Grhl1	1.01361	-0.0339607	6.20215	0.0127595	0.0281237	#N/A							Hr	-1.50549	0.489459	13.4456	0.000245581	0.00116641	#N/A
	Kif1c	1.01741	6.21519	101.505	7.12718e-24	1.51387e-22	#N/A							Gucy1b1	-1.49699	0.184915	8.31814	0.00392511	0.0130031	#N/A
	Tmsb10	1.01846	5.9136	89.9514	2.44078e-21	4.40078e-20	#N/A							Erp27	-1.49388	-0.389253	10.5681	0.00115058	0.00447921	#N/A
	Rpl15	1.01883	7.58665	89.1433	3.6723e-21	6.50329e-20	#N/A							Relt	-1.49103	3.5645	38.491	5.50059e-10	7.78278e-09	#N/A
	Rpl7a	1.01927	6.59696	61.8379	3.72932e-15	4.55429e-14	#N/A							Gm5296	-1.49033	0.0452079	10.7022	0.00107006	0.00421501	#N/A
	Srebf1	1.01955	6.56335	167.526	2.56747e-38	1.0876e-36	#N/A							4930430E12Rik	-1.48507	1.26787	5.77709	0.0162364	0.0428148	#N/A
	Mapk8ip1	1.02011	2.84773	15.4777	8.34838e-05	0.000304955	#N/A							Gm52681	-1.47969	1.15138	13.9042	0.000192368	0.000938556	#N/A
	Zfp704	1.02032	5.54945	134.934	3.41406e-31	1.065e-29	#N/A							Slc38a3	-1.4771	2.04713	9.91326	0.00164092	0.00611788	#N/A
	Bik	1.02039	1.43381	9.56238	0.00198605	0.00539811	#N/A							Gata2	-1.47521	0.704155	6.56753	0.0103856	0.0295844	#N/A
	Clec9a	1.02043	1.06319	12.2317	0.000469834	0.00147675	#N/A							Dnajb7	-1.47487	0.401019	14.2636	0.000158904	0.000794818	#N/A
	Metrnl	1.02056	3.08873	29.8479	4.67313e-08	2.79507e-07	#N/A							Cdc42ep1	-1.47421	0.755977	16.0823	6.06474e-05	0.000337641	#N/A
	Gm15860	1.02479	0.570681	9.97323	0.00158833	0.00440624	#N/A							Gpm6a	-1.47213	2.40126	10.4901	0.00120019	0.00464736	#N/A
	Srxn1	1.02594	2.94125	34.4894	4.28573e-09	2.89762e-08	#N/A							Dock5	-1.47093	1.30942	10.5334	0.00117234	0.00455698	#N/A
	Gm34931	1.02749	0.0101807	6.62783	0.0100398	0.0227553	#N/A							Bmp7	-1.46551	-0.075922	8.0228	0.00461922	0.014881	#N/A
	Atp1a1	1.02857	8.75828	113.597	1.59665e-26	3.92217e-25	#N/A							Cachd1	-1.46386	0.32571	9.85365	0.00169495	0.00628126	#N/A
	Mir682	1.02979	3.23792	5.82083	0.0158375	0.0340474	#N/A							Otx2	-1.4525	0.9005	8.91914	0.00282198	0.00980795	#N/A
	Arhgap10	1.03201	1.18474	9.21976	0.00239417	0.00638061	#N/A							Gm16124	-1.45066	1.11773	16.2014	5.69522e-05	0.000319768	#N/A
	Nrbf2	1.03267	4.88907	92.2708	7.55901e-22	1.40715e-20	#N/A							Sptb	-1.44937	0.880038	14.5156	0.000139004	0.000705189	#N/A
	Sec61g	1.03349	3.84022	33.4091	7.46757e-09	4.92913e-08	#N/A							Ccdc88c	-1.44769	1.39618	13.2203	0.000276936	0.00129276	#N/A
	Camk2n2	1.03413	0.94576	8.0211	0.00462354	0.0114142	#N/A							Ccdc125	-1.44374	1.70516	22.6024	1.99238e-06	1.54129e-05	#N/A
	Siva1	1.03497	3.18399	35.8375	2.14483e-09	1.50008e-08	#N/A							Zic1	-1.44152	0.122942	8.63864	0.00329107	0.0111667	#N/A
	4930487H11Rik	1.03553	0.574323	10.3806	0.00127344	0.00362372	#N/A							Fxyd1	-1.43929	0.634115	8.78091	0.00304399	0.0104512	#N/A
	Rpl37rt	1.03816	4.13904	21.4095	3.70931e-06	1.71025e-05	#N/A							4930481B07Rik	-1.43839	-0.125904	12.4931	0.000408466	0.00181399	#N/A
	Nmb	1.03875	1.50586	16.2855	5.448e-05	0.00020639	#N/A							Slc4a5	-1.43811	1.56747	6.92055	0.00852109	0.0249359	#N/A
	Adamts17	1.0405	0.0882961	5.51289	0.0188768	0.0396719	#N/A							Rasl2-9	-1.43424	1.56396	17.2439	3.28758e-05	0.000196519	#N/A
	Adam8	1.04189	3.39011	35.4921	2.5609e-09	1.77442e-08	#N/A							Ly6m	-1.43344	1.09357	13.2396	0.000274099	0.00128164	#N/A
	Lrp11	1.04257	1.86934	17.8729	2.36161e-05	9.54308e-05	#N/A							Krt8	-1.43319	0.223044	13.6751	0.000217317	0.00104356	#N/A
	Slc25a24	1.04515	1.02589	11.125	0.00085174	0.00252893	#N/A							Eln	-1.43145	1.14698	6.35361	0.0117143	0.0327058	#N/A
	Rpl10-ps6	1.04548	-0.0810601	5.8564	0.0155205	0.0334238	#N/A							Chp2	-1.43038	2.00041	16.6167	4.57453e-05	0.000263753	#N/A
	Pacsin3	1.04697	1.04588	11.6815	0.000631233	0.00193113	#N/A							C030005K06Rik	-1.42972	-0.180812	12.7845	0.000349501	0.00158616	#N/A
	Tbc1d4	1.047	5.50816	141.123	1.51229e-32	5.07876e-31	#N/A							Dab2ip	-1.42645	2.52111	23.3085	1.37987e-06	1.10491e-05	#N/A
	Kif21a	1.0471	1.19841	9.07069	0.00259739	0.00686087	#N/A							Pdzd2	-1.42518	0.965975	12.3268	0.000446504	0.00196198	#N/A
	Atp5e	1.04734	5.57671	53.9378	2.06941e-13	2.16085e-12	#N/A							Gm46916	-1.42517	1.57611	13.4235	0.000248491	0.00117746	#N/A
	Rgs3	1.05085	4.99082	69.6948	6.9229e-17	9.41856e-16	#N/A							Plekhg3	-1.42417	2.45551	17.3611	3.0908e-05	0.000185619	#N/A
	Dok4	1.05189	1.82078	23.0294	1.59543e-06	7.74901e-06	#N/A							Vav3	-1.42124	0.901082	7.03032	0.00801409	0.0236824	#N/A
	Gm14303	1.05421	2.15615	11.1881	0.00082323	0.00245014	#N/A							Ms4a14	-1.42048	1.99403	14.6749	0.000127739	0.000655086	#N/A
	Gm11478	1.05422	0.281674	6.33304	0.0118509	0.0263902	#N/A							Cpne2	-1.41936	2.16536	13.5602	0.000231034	0.0011025	#N/A
	AI504432	1.05479	4.53752	58.5113	2.02131e-14	2.3292e-13	#N/A							Gm5953	-1.41883	0.384928	11.0977	0.000864344	0.00350318	#N/A
	Mfge8	1.05595	5.42316	54.9966	1.2074e-13	1.28689e-12	#N/A							S1pr5	-1.41115	0.571097	9.2707	0.00232849	0.00831125	#N/A
	Lyplal1	1.05764	1.99726	22.3276	2.29876e-06	1.0921e-05	#N/A							Coro2b	-1.40782	0.769134	10.5145	0.00118442	0.00459512	#N/A
	Nuf2	1.0629	1.12138	14.0745	0.000175707	0.000603401	#N/A							Serpinb8	-1.40731	1.29392	13.2477	0.000272911	0.00127735	#N/A
	Xdh	1.06597	3.53192	29.1795	6.59737e-08	3.86992e-07	#N/A							Cnga2	-1.40649	0.160917	12.2945	0.000454295	0.00198758	#N/A
	Prxl2a	1.06598	3.59064	39.9658	2.58445e-10	2.02187e-09	#N/A							Dscc1	-1.40582	0.0854678	11.3572	0.000751563	0.00310297	#N/A
	Mapkapk2	1.06737	7.48188	156.948	5.25378e-36	2.08349e-34	#N/A							Hhip	-1.40466	-0.0709781	8.7692	0.0030636	0.0104953	#N/A
	COX1	1.06775	12.2817	73.3801	1.06937e-17	1.52733e-16	#N/A							Bnip5	-1.40432	0.466972	10.6114	0.0011239	0.00439647	#N/A
	Snrpg	1.06955	4.14334	41.4088	1.23498e-10	9.9809e-10	#N/A							Ltbp4	-1.4027	3.49386	5.90245	0.0151199	0.0403489	#N/A
	Guca1a	1.06976	2.57436	20.7938	5.11481e-06	2.31463e-05	#N/A							Cd93	-1.39953	3.70824	16.7613	4.23897e-05	0.000247023	#N/A
	Tpt1	1.07119	10.0455	79.8527	4.03391e-19	6.35831e-18	#N/A							Myorg	-1.39875	0.138269	6.33993	0.011805	0.032925	#N/A
	Ahcy	1.07314	3.39657	56.7486	4.95245e-14	5.48111e-13	#N/A							Gm36338	-1.39556	0.726552	8.20273	0.00418273	0.0137248	#N/A
	Plin3	1.07345	4.15074	52.6897	3.90643e-13	3.98146e-12	#N/A							Gm41926	-1.39447	0.239387	12.3113	0.000450232	0.00197468	#N/A
	Gm2223	1.07492	1.72766	20.7372	5.26833e-06	2.37999e-05	#N/A							Slit1	-1.39395	0.186217	6.38282	0.011523	0.0322914	#N/A
	Gm16477	1.07518	1.87692	22.7272	1.86706e-06	8.97186e-06	#N/A							LOC100861738	-1.39388	3.18526	27.4673	1.59771e-07	1.51922e-06	#N/A
	Cox6b1	1.07535	5.66885	86.1509	1.66713e-20	2.82164e-19	#N/A							Uchl1	-1.39184	0.232653	8.88893	0.00286904	0.00994175	#N/A
	COX2	1.07549	3.93615	36.9214	1.22988e-09	8.82521e-09	#N/A							Gm1604a	-1.39166	0.159764	10.1647	0.00143152	0.00543165	#N/A
	Rpl35a	1.07695	7.43895	25.9633	3.47978e-07	1.85178e-06	#N/A							Traf1	-1.39108	0.96678	6.38559	0.0115051	0.0322667	#N/A
	Plscr1	1.07766	2.38716	26.5852	2.52167e-07	1.36531e-06	#N/A							Gnai1	-1.39017	0.149143	10.181	0.00141894	0.00538537	#N/A
	Brdt	1.07849	0.945483	11.9513	0.000546102	0.00169221	#N/A							Col18a1	-1.38965	1.13099	8.88245	0.00287924	0.00997268	#N/A
	Timeless	1.07894	3.04837	24.6861	6.74693e-07	3.4465e-06	#N/A							Acacb	-1.38754	0.697741	6.65913	0.00986491	0.0283236	#N/A
	Pgm1	1.07931	5.17183	115.148	7.30248e-27	1.82086e-25	#N/A							Unc13b	-1.38569	3.49933	40.3096	2.16747e-10	3.26597e-09	#N/A
	P4htm	1.08077	0.471423	9.09991	0.00255622	0.00676171	#N/A							Gm9861	-1.38545	1.31844	16.3995	5.12987e-05	0.000290912	#N/A
	Itgal	1.08246	3.89809	26.6115	2.48765e-07	1.34787e-06	#N/A							Erbb3	-1.38064	0.103683	9.81557	0.00173041	0.00639424	#N/A
	Phldb1	1.08508	5.14953	75.5645	3.5366e-18	5.20576e-17	#N/A							Slc28a2	-1.3788	0.330836	12.8744	0.000333107	0.00152282	#N/A
	Ndufa2	1.08762	5.0701	46.4209	9.53904e-12	8.54274e-11	#N/A							Prelp	-1.37565	1.48524	7.99934	0.00467944	0.0150339	#N/A
	Eif3k	1.08883	6.07549	98.7441	2.87326e-23	5.90941e-22	#N/A							E230001N04Rik	-1.37464	-0.0121625	12.3398	0.000443397	0.00195075	#N/A
	Ssr4	1.09043	6.91332	106.951	4.56339e-25	1.03727e-23	#N/A							Gm22157	-1.3732	0.475139	10.6045	0.0011281	0.00440926	#N/A
	Mtmr11	1.091	2.89047	35.3222	2.79436e-09	1.92901e-08	#N/A							Ifitm6	-1.37255	0.565877	11.1686	0.000831922	0.0033873	#N/A
	Tmem107	1.09297	0.515015	11.5993	0.000659763	0.00201057	#N/A							Olfm1	-1.37118	2.17992	12.4728	0.000412916	0.00183031	#N/A
	Limch1	1.09363	1.41165	5.69327	0.0170301	0.0362713	#N/A							Ccdc8	-1.37096	1.10184	16.4807	4.91474e-05	0.000280398	#N/A
	6330403K07Rik	1.09378	0.279074	9.74244	0.00180062	0.00493639	#N/A							Col23a1	-1.37042	-0.214744	11.6287	0.000649427	0.00272259	#N/A
	Rpl8	1.09486	8.57332	102.145	5.16005e-24	1.10389e-22	#N/A							Gm32738	-1.36853	0.0818433	10.2452	0.00137039	0.0052221	#N/A
	Gprc5b	1.09501	2.40753	8.44464	0.0036612	0.00930336	#N/A							Bcan	-1.36849	2.65421	9.46061	0.00209931	0.00758701	#N/A
	Rps17	1.09664	7.45601	60.3201	8.06209e-15	9.63252e-14	#N/A							Gm16193	-1.36583	-0.0981768	11.3824	0.000741427	0.00306805	#N/A
	Cops9	1.09708	4.86488	44.6516	2.3541e-11	2.03255e-10	#N/A							Gm3740	-1.36499	-0.231771	10.4552	0.00122307	0.00472431	#N/A
	Rps11-ps1	1.09879	0.229582	7.3071	0.00686826	0.0162436	#N/A							Kcnj13	-1.36378	2.80567	8.56614	0.00342472	0.0115565	#N/A
	Rps10-ps1	1.09924	2.19319	19.3553	1.0852e-05	4.65384e-05	#N/A							Pdlim7	-1.36304	1.63447	5.53517	0.018638	0.0479831	#N/A
	Micos13	1.10088	4.44624	53.3474	2.79485e-13	2.88801e-12	#N/A							LOC118567393	-1.36036	1.41357	12.7933	0.000347855	0.00158054	#N/A
	Nectin3	1.10219	0.213795	5.12253	0.0236172	0.0482339	#N/A							St6galnac2	-1.35779	0.328559	8.68293	0.00321204	0.0109432	#N/A
	TrnP	1.10261	3.8136	53.3289	2.82131e-13	2.91334e-12	#N/A							Bcam	-1.35676	2.24422	7.96986	0.00475626	0.015222	#N/A
	H2ac18	1.10271	0.576251	9.46212	0.00209759	0.00567232	#N/A							Gm38709	-1.35653	1.5211	14.9935	0.000107885	0.000564142	#N/A
	Ddhd1	1.10274	5.24389	143.786	3.95651e-33	1.3784e-31	#N/A							Aifm3	-1.35536	0.888955	10.1325	0.00145678	0.00551215	#N/A
	Rab36	1.10319	1.53538	17.6418	2.66657e-05	0.000106484	#N/A							Acsl6	-1.35336	1.35247	7.02137	0.00805426	0.0237763	#N/A
	Gm4737	1.10353	1.20025	13.5769	0.000228982	0.000768306	#N/A							A930033H14Rik	-1.35226	2.44506	20.3438	6.4702e-06	4.52083e-05	#N/A
	Gm19582	1.10542	0.284896	10.6512	0.00110002	0.00317569	#N/A							Gm36161	-1.34913	0.634176	5.91899	0.0149786	0.0400627	#N/A
	Cox6c	1.10739	5.39514	83.1538	7.59113e-20	1.25073e-18	#N/A							Pcp4l1	-1.34608	2.30985	13.3374	0.000260169	0.00122297	#N/A
	Ercc6	1.10808	5.24383	132.96	9.22412e-31	2.81846e-29	#N/A							Dnah2	-1.34434	1.53077	16.1445	5.86901e-05	0.000328353	#N/A
	Adgrg5	1.10977	0.207688	7.20503	0.00726997	0.017109	#N/A							Slco1a4	-1.34308	2.09771	5.83452	0.0157147	0.0416146	#N/A
	Ctla2b	1.11196	4.64902	77.3905	1.4029e-18	2.12804e-17	#N/A							Cbs	-1.33678	0.27031	11.3789	0.000742834	0.00307231	#N/A
	COX3	1.11197	3.28098	47.8021	4.71488e-12	4.3415e-11	#N/A							Arhgap27os3	-1.33144	3.58902	35.0041	3.29012e-09	4.10149e-08	#N/A
	Gdf15	1.11261	1.20358	8.56394	0.00342887	0.00878637	#N/A							Kdm6b	-1.32939	5.32506	99.8794	1.61968e-23	1.04643e-21	#N/A
	Afdn	1.11435	5.34592	96.5932	8.51423e-23	1.69049e-21	#N/A							Nrxn2	-1.32618	1.01485	11.9216	0.000554861	0.00237326	#N/A
	Pcdhgb6	1.11451	1.61521	22.0646	2.63632e-06	1.24399e-05	#N/A							Epor	-1.32612	0.867444	13.9388	0.000188856	0.000923333	#N/A
	Abtb2	1.11575	0.188702	7.56449	0.00595294	0.0143145	#N/A							Slco1c1	-1.32263	2.763	16.0131	6.29049e-05	0.000348626	#N/A
	Rpl27	1.11618	7.59953	49.7887	1.71229e-12	1.65469e-11	#N/A							Tlr8	-1.32251	2.93997	15.2946	9.19777e-05	0.000489245	#N/A
	Slamf7	1.11896	3.37995	49.5377	1.94592e-12	1.8744e-11	#N/A							Dnm1	-1.32168	0.306952	10.6253	0.00111553	0.00437462	#N/A
	Htatip2	1.11957	3.0035	43.2421	4.83677e-11	4.06087e-10	#N/A							Il6	-1.31982	2.3923	20.2245	6.88636e-06	4.77155e-05	#N/A
	Nrcam	1.12137	0.505492	5.35563	0.0206555	0.0428126	#N/A							LOC118568401	-1.3184	1.12795	14.4761	0.000141946	0.000718307	#N/A
	Mxra7	1.12159	2.7253	36.961	1.20516e-09	8.66028e-09	#N/A							Itga3	-1.30427	0.284939	8.16612	0.00426802	0.0139529	#N/A
	Gys1	1.12262	4.09899	80.742	2.57191e-19	4.11478e-18	#N/A							Gnb4	-1.30424	1.13881	13.3825	0.000253979	0.00119875	#N/A
	AI507597	1.12287	-0.146513	7.53575	0.00604866	0.0145143	#N/A							Gm35358	-1.3037	-0.143201	9.76779	0.00177595	0.00654545	#N/A
	Rpl18	1.12389	8.11181	67.2419	2.40152e-16	3.1384e-15	#N/A							Gm16578	-1.30278	0.22231	11.1894	0.000822663	0.0033525	#N/A
	3110082I17Rik	1.12532	3.88068	59.8271	1.03565e-14	1.22755e-13	#N/A							Palld	-1.30263	1.83488	10.7115	0.00106473	0.00419752	#N/A
	Mmp19	1.12823	0.937271	13.5385	0.000233719	0.00078279	#N/A							Lamb1	-1.30191	0.588085	10.3054	0.00132641	0.00507501	#N/A
	Gm12758	1.1314	0.143412	9.46757	0.00209136	0.00565696	#N/A							Epn3	-1.29935	0.702102	7.20125	0.0072853	0.0218816	#N/A
	Gm13394	1.13413	0.466179	10.5272	0.0011763	0.00336851	#N/A							Pi16	-1.29649	0.157211	8.49195	0.0035672	0.0119659	#N/A
	Fdft1	1.13477	4.1254	90.1584	2.19837e-21	3.98782e-20	#N/A							Gm5915	-1.2953	-0.259654	9.9039	0.00164929	0.00614424	#N/A
	Gm16418	1.1379	0.913401	9.76943	0.00177438	0.00486714	#N/A							Gm52503	-1.29028	2.55026	17.5702	2.76889e-05	0.000168358	#N/A
	Acot11	1.13846	2.68205	28.6338	8.74403e-08	5.04575e-07	#N/A							Heg1	-1.28883	2.63847	18.0341	2.16978e-05	0.000135005	#N/A
	Coq7	1.13886	2.95477	36.555	1.48416e-09	1.05634e-08	#N/A							Gm31003	-1.28324	7.54826	72.8335	1.41065e-17	5.13094e-16	#N/A
	Cox8a	1.13902	6.57906	103.417	2.71561e-24	5.89409e-23	#N/A							Gm3704	-1.28232	1.66378	11.1517	0.000839559	0.00341348	#N/A
	Septin3	1.14826	0.817836	9.09405	0.00256442	0.00678102	#N/A							LOC118568585	-1.28194	0.114697	6.60763	0.0101543	0.02903	#N/A
	Ssx2ip	1.15046	4.04449	80.5274	2.86696e-19	4.56235e-18	#N/A							Mpdz	-1.2806	0.0445933	5.90968	0.0150579	0.0402292	#N/A
	Gramd3	1.15527	2.12013	27.5736	1.51231e-07	8.50303e-07	#N/A							Hbegf	-1.28007	1.32753	12.7089	0.000363917	0.00164297	#N/A
	Mapk8ip2	1.15681	0.191388	6.27775	0.0122263	0.0271195	#N/A							Pygm	-1.27978	1.88659	12.3047	0.000451821	0.0019792	#N/A
	Tmem26	1.15702	0.59979	12.8507	0.000337357	0.00109164	#N/A							LOC118567707	-1.27968	1.38147	11.6841	0.000630363	0.00265352	#N/A
	Gcat	1.15791	1.63231	23.1543	1.49508e-06	7.29248e-06	#N/A							Cav2	-1.2796	3.32359	26.022	3.37547e-07	3.02467e-06	#N/A
	Melk	1.15798	0.380427	9.40752	0.00216098	0.00583421	#N/A							Gm39487	-1.279	1.43501	13.9727	0.00018548	0.000909655	#N/A
	Mpped1	1.15816	-0.00796648	7.36275	0.00665889	0.0158006	#N/A							Pim1	-1.27641	3.93358	9.50974	0.00204384	0.00740925	#N/A
	ND4L	1.1608	1.32029	15.2584	9.37584e-05	0.000339163	#N/A							LOC118567944	-1.27522	0.436831	11.0361	0.00089356	0.00360919	#N/A
	Lsp1	1.16225	7.06402	63.895	1.31229e-15	1.64433e-14	#N/A							Spint2	-1.27483	1.65771	8.43606	0.00367852	0.012284	#N/A
	Cdnf	1.16261	0.271664	11.5328	0.000683781	0.00207909	#N/A							Gm39173	-1.27481	2.50198	16.2815	5.45929e-05	0.000307866	#N/A
	Hsd17b7	1.1627	2.67902	24.1811	8.76883e-07	4.41339e-06	#N/A							Nat1	-1.26896	0.965054	13.8566	0.000197298	0.000959962	#N/A
	Cox4i1	1.1628	7.47263	94.2221	2.82034e-22	5.43334e-21	#N/A							Gm13840	-1.26896	1.26727	15.1081	0.000101529	0.000536153	#N/A
	Tmem160	1.16281	4.96219	53.1296	3.12249e-13	3.21543e-12	#N/A							Gm10406	-1.26566	0.237761	6.63285	0.0100115	0.0286805	#N/A
	Sacs	1.16412	3.53705	53.4992	2.587e-13	2.68252e-12	#N/A							Map7d3	-1.26441	0.245341	10.4654	0.00121634	0.0047009	#N/A
	Rps8	1.16596	8.14684	80.707	2.61788e-19	4.18384e-18	#N/A							Spata33	-1.26295	-0.0790563	10.3943	0.00126408	0.00486944	#N/A
	Prdx1	1.16711	6.93961	118.175	1.58768e-27	4.08875e-26	#N/A							Gm50587	-1.26264	1.66336	15.0441	0.000105027	0.000551402	#N/A
	Atp5mpl	1.16839	4.47007	61.2824	4.94492e-15	5.99461e-14	#N/A							Cyb561	-1.26208	1.31559	7.06088	0.00787852	0.0233745	#N/A
	Msantd3	1.17016	-0.102721	6.06245	0.0138086	0.0301597	#N/A							Ndrg4	-1.25805	0.914436	5.56767	0.0182951	0.0472799	#N/A
	Nphp1	1.17051	2.85582	28.6094	8.85517e-08	5.10593e-07	#N/A							Thra	-1.2579	4.24754	49.9304	1.59294e-12	3.1879e-11	#N/A
	Brsk1	1.17623	1.32802	10.0632	0.00151264	0.00422457	#N/A							Gjb6	-1.25778	0.0533229	7.2316	0.00716312	0.0215799	#N/A
	Gm5905	1.17884	-0.0581601	8.48053	0.00358967	0.00914654	#N/A							Gm10614	-1.25756	0.338025	5.67784	0.0171805	0.0449033	#N/A
	Gm36048	1.17916	-0.0879246	7.89652	0.00495299	0.012151	#N/A							LOC115488283	-1.2571	1.67146	9.87885	0.0016719	0.00621373	#N/A
	ATP6	1.18223	3.33488	39.2961	3.64176e-10	2.79333e-09	#N/A							Gm13547	-1.25444	-0.0989009	6.88924	0.00867162	0.025277	#N/A
	Enah	1.18509	2.17903	11.4954	0.000697703	0.00211538	#N/A							Kank1	-1.25394	0.396679	7.26259	0.00704057	0.0212584	#N/A
	Plce1	1.18663	1.13833	11.3428	0.000757412	0.00227284	#N/A							Gsta4	-1.24713	0.54783	7.16546	0.00743206	0.0222741	#N/A
	Slain1	1.18796	0.612236	8.2318	0.00411627	0.0103329	#N/A							Tmem98	-1.24425	0.691507	7.51485	0.00611925	0.018863	#N/A
	Irak1bp1	1.18848	1.20096	15.1068	0.000101597	0.000364688	#N/A							6330418K02Rik	-1.24242	3.53177	37.2834	1.02149e-09	1.38043e-08	#N/A
	Gstm5	1.19015	3.33484	48.1501	3.94804e-12	3.65875e-11	#N/A							Slc2a10	-1.24193	0.775782	11.0296	0.000896667	0.0036176	#N/A
	Fundc2	1.19149	4.42004	96.1737	1.05231e-22	2.0728e-21	#N/A							Cald1	-1.24127	1.81203	6.19616	0.0128028	0.0352083	#N/A
	Gm10175	1.19285	0.32252	12.348	0.000441457	0.00139639	#N/A							Ednrb	-1.2395	1.5494	10.7784	0.0010269	0.0040699	#N/A
	Eno1	1.19296	8.53659	156.717	5.90237e-36	2.32831e-34	#N/A							Slc14a1	-1.23857	1.73266	10.6565	0.00109684	0.00430969	#N/A
	Slc35e4	1.19551	3.37454	53.0346	3.27731e-13	3.36788e-12	#N/A							Atp2b2	-1.2332	2.14225	12.9462	0.000320564	0.00147214	#N/A
	Cntn2	1.19774	2.16698	5.5532	0.0184469	0.038878	#N/A							Gm46687	-1.22839	1.40923	9.59797	0.00194793	0.00710159	#N/A
	Cdca7l	1.20494	0.491238	11.2954	0.000777006	0.00232276	#N/A							Ehd1	-1.22233	2.84557	8.77496	0.00305393	0.0104752	#N/A
	Syne3	1.20676	0.947364	14.4201	0.000146232	0.000510766	#N/A							Gm33023	-1.21916	0.985605	12.1839	0.000482029	0.00209274	#N/A
	Rpl15-ps3	1.20714	1.11616	16.2144	5.65612e-05	0.000213623	#N/A							LOC118567477	-1.21363	-0.0151576	8.58154	0.00339589	0.0114729	#N/A
	Smpdl3a	1.21064	5.29493	98.1711	3.83748e-23	7.82773e-22	#N/A							Gm40782	-1.21312	0.27924	8.76968	0.00306279	0.0104953	#N/A
	Pcgf2	1.21065	2.40031	35.823	2.16083e-09	1.50914e-08	#N/A							Camp	-1.20745	1.55466	5.69714	0.0169926	0.044532	#N/A
	Gm6477	1.21216	0.247953	8.54654	0.00346179	0.00885399	#N/A							Pik3r3	-1.20595	2.27754	21.18	4.18109e-06	3.04312e-05	#N/A
	Gm10709	1.21283	2.12427	14.2679	0.000158547	0.000549406	#N/A							P2ry10b	-1.20546	4.35305	51.2472	8.14363e-13	1.69947e-11	#N/A
	Cplx2	1.21287	2.00672	9.58738	0.0019592	0.00532803	#N/A							Vwf	-1.20489	3.43062	5.93968	0.0148037	0.0396701	#N/A
	AI839979	1.21472	0.833722	13.3015	0.000265193	0.000879319	#N/A							Stk39	-1.20391	2.22621	9.21446	0.00240112	0.00853389	#N/A
	Gm41358	1.21517	0.0309962	9.22255	0.00239052	0.00637316	#N/A							Gm14537	-1.20211	0.138343	5.51499	0.0188541	0.0483887	#N/A
	Olfr99	1.21891	0.130523	10.6402	0.00110656	0.00319147	#N/A							Gm16867	-1.20191	0.430476	8.13803	0.00433463	0.0141185	#N/A
	Rab13	1.21985	0.356274	12.5041	0.00040607	0.00129378	#N/A							Gm51961	-1.19973	0.13595	7.9491	0.00481112	0.0153663	#N/A
	Gm11942	1.22258	1.29337	14.8804	0.000114549	0.00040833	#N/A							Syt6	-1.19885	1.26848	8.80247	0.00300823	0.0103485	#N/A
	Lmnb1	1.22371	4.5309	152.336	5.34912e-35	1.9841e-33	#N/A							Vangl1	-1.19629	2.80893	23.4059	1.31178e-06	1.05577e-05	#N/A
	Amot	1.22692	0.859778	10.7013	0.00107061	0.00310037	#N/A							Gm38952	-1.19544	0.740067	9.05171	0.00262449	0.00920751	#N/A
	Scimp	1.22894	2.35336	35.1977	2.97874e-09	2.04682e-08	#N/A							A530010L16Rik	-1.19522	0.385289	9.28418	0.00231142	0.00826281	#N/A
	Fads2	1.23478	2.40106	15.9085	6.64806e-05	0.000247575	#N/A							Gm16118	-1.19503	5.33889	52.3085	4.74321e-13	1.02304e-11	#N/A
	Cenpe	1.23478	2.06917	28.9273	7.51465e-08	4.36846e-07	#N/A							Gm3173	-1.19292	3.31045	19.6195	9.45005e-06	6.36103e-05	#N/A
	Kndc1	1.23629	0.981549	6.51397	0.010703	0.0240968	#N/A							Pip5k1b	-1.19222	0.29518	7.91659	0.00489835	0.0156131	#N/A
	Eef2-ps2	1.23712	3.29167	50.1934	1.39314e-12	1.35772e-11	#N/A							Ggnbp2os	-1.19122	1.96667	14.5851	0.000133971	0.000681856	#N/A
	Lmna	1.23734	3.32789	54.8388	1.30831e-13	1.39146e-12	#N/A							Zfyve28	-1.1904	4.46208	42.2459	8.04882e-11	1.27958e-09	#N/A
	mt-Rnr2	1.24165	8.16196	55.3166	1.02596e-13	1.10217e-12	#N/A							Gm39859	-1.18926	1.53421	12.6448	0.000376619	0.00169329	#N/A
	Ncan	1.24334	0.72128	7.01595	0.00807869	0.0187751	#N/A							LOC115486538	-1.18529	5.28221	24.4613	7.58186e-07	6.39307e-06	#N/A
	Gapdh	1.24481	4.55545	13.2133	0.000277977	0.000918235	#N/A							Gm32645	-1.18525	1.33378	9.48417	0.00207252	0.00750552	#N/A
	Slc43a3	1.24807	2.89864	48.5202	3.26898e-12	3.06564e-11	#N/A							Gm52524	-1.18346	0.399237	9.85888	0.00169014	0.0062692	#N/A
	Atf5	1.24812	3.78121	28.5401	9.17762e-08	5.28981e-07	#N/A							Klf2	-1.18087	5.78534	7.9964	0.00468705	0.0150516	#N/A
	Chchd10	1.24848	2.7154	39.9011	2.67151e-10	2.08669e-09	#N/A							Dusp27	-1.18085	4.08093	39.3972	3.45789e-10	5.0543e-09	#N/A
	Cyb5r3	1.24898	5.65589	142.226	8.67892e-33	2.9546e-31	#N/A							Folr1	-1.17837	1.76426	7.79209	0.00524755	0.0165731	#N/A
	Msmo1	1.25279	5.28494	147.386	6.46235e-34	2.32193e-32	#N/A							Spon1	-1.17822	0.130176	9.70267	0.00184001	0.00674462	#N/A
	LOC118568032	1.25329	0.595517	13.0532	0.000302764	0.000988955	#N/A							Gm41610	-1.17723	1.31368	10.9398	0.0009412	0.00377146	#N/A
	Sag	1.2551	0.413889	10.3392	0.00130232	0.00369673	#N/A							Gm3739	-1.17302	5.83575	36.7772	1.32429e-09	1.75423e-08	#N/A
	Nsun7	1.25669	0.114602	9.1903	0.00243302	0.00647834	#N/A							Gm7598	-1.17141	0.244391	9.72103	0.00182171	0.00668517	#N/A
	Pcdh9	1.25684	0.908394	8.97105	0.00274291	0.00720188	#N/A							Ddit4	-1.16978	4.10451	14.1138	0.000172075	0.000850398	#N/A
	Shank3	1.25823	1.45914	6.6388	0.0099781	0.022643	#N/A							Mex3b	-1.167	4.55404	48.4863	3.32605e-12	6.35092e-11	#N/A
	Zfp13	1.25954	0.917658	15.3532	8.91682e-05	0.000324132	#N/A							Col9a3	-1.16315	2.95787	10.6879	0.00107837	0.0042442	#N/A
	Magi2	1.26304	0.403738	9.65371	0.0018897	0.0051569	#N/A							1700009J07Rik	-1.16305	1.12051	12.3508	0.000440796	0.00194169	#N/A
	Mirt1	1.26573	1.96464	27.1467	1.88586e-07	1.04458e-06	#N/A							Gm6855	-1.16168	0.771585	8.96074	0.00275843	0.00962254	#N/A
	Ms4a4b	1.26907	-0.228108	5.53257	0.0186657	0.0393007	#N/A							LOC100861749	-1.16094	6.49453	28.1887	1.10044e-07	1.07529e-06	#N/A
	Plekhh1	1.26935	2.42459	30.7804	2.88948e-08	1.77378e-07	#N/A							Gm12258	-1.16051	3.90482	35.3208	2.79627e-09	3.53886e-08	#N/A
	2610524H06Rik	1.27647	1.09757	13.4074	0.000250635	0.000835319	#N/A							Mir24-2	-1.16046	1.27836	12.7367	0.000358554	0.00162238	#N/A
	Pfkl	1.27668	7.49494	155.005	1.39698e-35	5.39648e-34	#N/A							Gm51987	-1.15885	2.127	12.2718	0.000459857	0.00200771	#N/A
	Ddo	1.27692	0.279892	6.8819	0.00870727	0.0200733	#N/A							Dmwd	-1.15818	1.64984	12.5663	0.000392765	0.00175528	#N/A
	Mapt	1.27792	2.61951	9.60789	0.00193743	0.00527462	#N/A							Slc23a1	-1.15817	0.817436	9.82844	0.00171834	0.00635776	#N/A
	Ftl1	1.27871	10.8144	156.983	5.16151e-36	2.05235e-34	#N/A							I830077J02Rik	-1.15756	6.6881	81.9111	1.42349e-19	6.21636e-18	#N/A
	Gm5786	1.28323	-0.129131	6.66227	0.00984754	0.0223802	#N/A							5830433I10Rik	-1.15711	0.345035	9.28891	0.00230545	0.00824866	#N/A
	Haao	1.28329	4.50587	89.6907	2.78459e-21	4.98451e-20	#N/A							Itgb7	-1.15349	2.3444	11.5212	0.000688075	0.00286847	#N/A
	Gm12918	1.28365	1.99452	29.7922	4.80914e-08	2.87296e-07	#N/A							Atp1b2	-1.15274	2.55944	9.90677	0.00164671	0.00613626	#N/A
	Mfsd4b3-ps	1.28453	-0.227816	6.15426	0.0131096	0.0288271	#N/A							Gm17025	-1.1523	0.992411	9.80395	0.00174137	0.00642805	#N/A
	Hmmr	1.28523	1.18537	22.2148	2.43781e-06	1.15434e-05	#N/A							9030025P20Rik	-1.15114	2.00478	14.9914	0.000108005	0.000564315	#N/A
	Pqlc3	1.28613	3.96155	75.8557	3.05165e-18	4.51869e-17	#N/A							Gm41361	-1.15093	0.422151	6.80386	0.00909611	0.0263515	#N/A
	Id2	1.29148	4.88772	58.8895	1.66782e-14	1.93532e-13	#N/A							Mical2	-1.14849	1.96531	9.10046	0.00255545	0.00899655	#N/A
	Aldh1l1	1.29441	2.01277	30.7279	2.96864e-08	1.81937e-07	#N/A							Nova1	-1.14767	4.76379	46.3446	9.91819e-12	1.79118e-10	#N/A
	Glipr2	1.29547	1.161	16.1215	5.94067e-05	0.000223464	#N/A							Dbp	-1.14585	4.09163	18.2304	1.95734e-05	0.000123031	#N/A
	Sestd1	1.29654	1.99973	26.2438	3.00917e-07	1.61518e-06	#N/A							Cd79b	-1.14534	3.73788	31.5417	1.95206e-08	2.14939e-07	#N/A
	G0s2	1.29692	0.841223	16.8276	4.09338e-05	0.000158701	#N/A							Idh2	-1.14503	6.45543	93.9565	3.22535e-22	1.81815e-20	#N/A
	H60b	1.29963	0.25334	9.10053	0.00255535	0.00676171	#N/A							Ptgds	-1.14215	3.24618	14.2631	0.000158955	0.000794818	#N/A
	Iqgap1	1.29966	5.64217	98.7127	2.91921e-23	5.98738e-22	#N/A							Camkk1	-1.14061	4.39769	69.2715	8.58019e-17	2.9113e-15	#N/A
	Tmem229a	1.30027	1.49477	10.4434	0.00123092	0.0035121	#N/A							Abcc9	-1.14041	0.470869	8.83398	0.00295673	0.0101936	#N/A
	Ptpn7	1.30314	1.17854	19.4234	1.04718e-05	4.50505e-05	#N/A							Mfsd6	-1.14038	1.51599	8.04126	0.00457236	0.0147502	#N/A
	Dlgap5	1.30316	1.14981	17.6766	2.61825e-05	0.000104751	#N/A							Ntsr2	-1.13837	1.03251	6.6521	0.00990389	0.0284182	#N/A
	Unc80	1.3041	-0.229541	5.70927	0.0168756	0.036004	#N/A							Gm4356	-1.13642	1.49815	11.1541	0.000838477	0.00341006	#N/A
	Gm39212	1.30675	0.982299	17.1717	3.4148e-05	0.00013403	#N/A							4933439K11Rik	-1.13591	-0.194355	6.4743	0.0109446	0.0309221	#N/A
	Chaf1b	1.30831	1.10351	16.1029	5.99929e-05	0.000225329	#N/A							Emilin1	-1.13529	1.82691	6.55569	0.0104549	0.02974	#N/A
	ND3	1.3099	1.89112	19.905	8.13867e-06	3.563e-05	#N/A							Gm2897	-1.1347	0.335259	8.01393	0.00464188	0.0149442	#N/A
	Rps29	1.31135	7.66286	22.9481	1.66436e-06	8.06806e-06	#N/A							Gm9949	-1.13417	2.53448	13.7954	0.000203829	0.000986651	#N/A
	Bmerb1	1.31418	0.0592218	9.22388	0.00238879	0.00636968	#N/A							Tm6sf1	-1.13413	6.74103	79.3582	5.18114e-19	2.13104e-17	#N/A
	Kcna2	1.31598	0.570746	10.7906	0.00102014	0.00297387	#N/A							Rd3	-1.13108	0.0083911	5.99887	0.0143151	0.0385651	#N/A
	N4bp3	1.31916	2.04728	11.2793	0.00078376	0.00234201	#N/A							Mamld1	-1.1303	2.51396	17.5536	2.79316e-05	0.000169688	#N/A
	Rps6-ps4	1.31983	4.46012	73.5731	9.69761e-18	1.3904e-16	#N/A							Ramp2	-1.12987	0.787304	6.23119	0.012552	0.0346262	#N/A
	Tnr	1.32148	-0.343051	5.19772	0.0226165	0.0464055	#N/A							Gm34058	-1.12862	0.0557132	7.60559	0.00581878	0.018073	#N/A
	Map1a	1.32634	1.78859	7.14466	0.00751876	0.0176388	#N/A							Gm15950	-1.1285	-0.215017	6.4725	0.0109557	0.0309343	#N/A
	Rpl34	1.32738	7.75115	94.6138	2.31401e-22	4.46945e-21	#N/A							Gm12708	-1.12815	0.696787	8.32103	0.00391888	0.012987	#N/A
	Adgrb1	1.33174	1.39115	5.54454	0.0185384	0.0390542	#N/A							Ephb3	-1.12691	3.04238	24.9241	5.96321e-07	5.11354e-06	#N/A
	Mbp	1.33272	6.77778	38.0277	6.97475e-10	5.16644e-09	#N/A							Slamf1	-1.12618	2.26033	18.0989	2.09717e-05	0.000131122	#N/A
	Slc17a7	1.33295	0.202906	5.0881	0.0240906	0.0490932	#N/A							Gm15706	-1.12567	1.29448	10.1982	0.00140581	0.0053441	#N/A
	Fut7	1.33433	1.03696	24.2817	8.32237e-07	4.20661e-06	#N/A							Bmp1	-1.12529	3.33417	33.123	8.65077e-09	1.00658e-07	#N/A
	Cped1	1.3346	0.458846	9.43123	0.00213322	0.00576448	#N/A							Cirbp	-1.12527	6.43872	58.7403	1.79917e-14	4.58674e-13	#N/A
	Il2rg	1.33584	4.12053	72.5059	1.66529e-17	2.33595e-16	#N/A							Gm32133	-1.12022	0.489963	8.5563	0.00344329	0.0116091	#N/A
	Meg3	1.33622	2.05999	10.4536	0.00122407	0.00349456	#N/A							Gm39000	-1.11537	1.02838	10.3697	0.00128099	0.00492653	#N/A
	Scrn1	1.3371	0.202105	9.51915	0.00203339	0.00551772	#N/A							Plppr4	-1.11403	2.04426	9.8421	0.00170563	0.00631422	#N/A
	Meox1	1.33983	-0.0708152	8.66306	0.00324726	0.00836556	#N/A							Ephb6	-1.11305	0.491288	5.8868	0.0152548	0.0406443	#N/A
	Mcf2l	1.33987	0.843518	7.41908	0.00645357	0.0153696	#N/A							Rbfaos	-1.11221	0.706273	7.39056	0.0065567	0.0200196	#N/A
	Bfsp1	1.34045	0.182618	11.9725	0.000539913	0.00167478	#N/A							Gm33470	-1.11146	0.800626	8.87714	0.00288763	0.00999684	#N/A
	Gdf11	1.34272	1.05466	12.0113	0.000528804	0.00164271	#N/A							1700001C19Rik	-1.11085	1.32081	10.4599	0.00121991	0.0047134	#N/A
	Adcyap1r1	1.34345	1.14792	8.00804	0.00465701	0.0114854	#N/A							Gm32620	-1.10999	-0.0336655	6.76931	0.00927385	0.026792	#N/A
	Gm12174	1.34347	2.50635	41.8385	9.91341e-11	8.09522e-10	#N/A							Lrrc4	-1.10745	2.04968	15.0791	0.000103099	0.000543092	#N/A
	LOC118568383	1.34571	-0.254312	8.83816	0.00294997	0.00768643	#N/A							Id3	-1.10521	0.992862	6.06281	0.0138058	0.0374479	#N/A
	B3gnt3	1.34789	1.02314	19.2457	1.14929e-05	4.89493e-05	#N/A							Slc4a8	-1.10473	0.444273	6.9315	0.00846904	0.0247938	#N/A
	Rilpl2	1.35513	3.55154	88.6171	4.79135e-21	8.40515e-20	#N/A							LOC115487216	-1.10359	0.62444	7.95571	0.00479359	0.0153276	#N/A
	Abat	1.3556	2.61446	16.2672	5.50087e-05	0.000208076	#N/A							Rnase12	-1.10225	-0.142044	6.87407	0.00874553	0.0254662	#N/A
	P2ry2	1.35562	1.29089	21.1047	4.34852e-06	1.98655e-05	#N/A							Zc2hc1c	-1.10166	0.248473	8.98854	0.00271677	0.00950535	#N/A
	Rps3a2	1.35591	1.71749	34.2258	4.9075e-09	3.29714e-08	#N/A							Pla2g2d	-1.10157	1.686	9.10905	0.00254347	0.00897223	#N/A
	Lpar1	1.35748	0.202283	9.9459	0.00161208	0.00446632	#N/A							Klhdc8b	-1.10064	6.11663	61.514	4.39597e-15	1.2099e-13	#N/A
	Pygl	1.35806	4.88886	143.221	5.25852e-33	1.81925e-31	#N/A							Eps8l2	-1.09908	0.757489	5.55332	0.0184456	0.0475646	#N/A
	Plppr2	1.36106	0.613127	11.7196	0.000618452	0.0018967	#N/A							Gm31619	-1.09869	3.18025	19.282	1.12766e-05	7.45227e-05	#N/A
	Rhoc	1.36199	5.12468	93.8436	3.41462e-22	6.52762e-21	#N/A							Fam228b	-1.09718	1.62314	12.0249	0.000524953	0.00225762	#N/A
	Runx3	1.36318	1.86354	28.5194	9.27628e-08	5.34461e-07	#N/A							Gm36109	-1.09494	1.37941	5.61772	0.0177797	0.0461334	#N/A
	Pygo1	1.36719	-0.209198	9.98983	0.00157407	0.00437646	#N/A							Map4k2	-1.09441	6.91982	66.1258	4.23046e-16	1.30692e-14	#N/A
	1110008P14Rik	1.37525	1.85746	31.5629	1.93084e-08	1.21378e-07	#N/A							Ushbp1	-1.09361	0.375678	5.91535	0.0150095	0.0401303	#N/A
	Rpl17-ps8	1.3753	0.117131	11.9864	0.000535902	0.00166268	#N/A							Adam4	-1.09324	0.983163	8.41454	0.00372232	0.0124127	#N/A
	Gm5421	1.37603	0.33702	15.6355	7.68006e-05	0.00028248	#N/A							Vtn	-1.09224	2.34056	6.3097	0.0120079	0.0333989	#N/A
	Hip1	1.3761	4.64203	84.9667	3.03433e-20	5.10665e-19	#N/A							Slc16a2	-1.09221	2.10479	6.22494	0.0125963	0.0347092	#N/A
	Septin11	1.37998	5.14204	198.288	4.93579e-45	2.72584e-43	#N/A							LOC118568707	-1.09219	2.4942	15.9222	6.59995e-05	0.000363074	#N/A
	A730081D07Rik	1.38205	0.783623	15.8891	6.71643e-05	0.000249934	#N/A							Sox4	-1.09192	6.57751	89.9638	2.42557e-21	1.24798e-19	#N/A
	Gm10240	1.38259	-0.131027	11.5899	0.000663127	0.00202	#N/A							Arrdc3	-1.09049	5.36348	39.877	2.70476e-10	4.01149e-09	#N/A
	Tmem158	1.38621	0.875546	17.453	2.94492e-05	0.000116818	#N/A							Ccdc39	-1.08989	3.15881	22.4281	2.18161e-06	1.67304e-05	#N/A
	Ftl1-ps1	1.38686	4.05511	101.766	6.24747e-24	1.3289e-22	#N/A							Gm33869	-1.08799	4.01705	26.5445	2.57539e-07	2.35547e-06	#N/A
	Aopep	1.38687	4.58519	118.81	1.15286e-27	3.01056e-26	#N/A							Itgae	-1.08718	2.96018	13.2353	0.000274726	0.00128372	#N/A
	Anxa4	1.38781	5.3464	160.757	7.73301e-37	3.13334e-35	#N/A							4933417D19Rik	-1.08718	0.200465	7.17544	0.00739083	0.0221788	#N/A
	Plxnd1	1.39449	4.02255	57.201	3.93461e-14	4.40458e-13	#N/A							Cdkl4	-1.08635	1.06986	8.45296	0.0036445	0.012179	#N/A
	Map2	1.39995	1.8823	9.58204	0.0019649	0.00534256	#N/A							Ccm2l	-1.07987	1.32406	8.32735	0.00390525	0.0129586	#N/A
	Rasal1	1.40114	0.515126	11.0938	0.000866152	0.00256661	#N/A							Gm30908	-1.07844	0.73741	8.58984	0.00338044	0.0114316	#N/A
	Lsamp	1.40966	0.580053	7.94693	0.00481691	0.0118464	#N/A							Pnma2	-1.0743	0.332636	5.82759	0.0157767	0.0417398	#N/A
	Ly6i	1.41272	0.188529	11.9221	0.000554729	0.00171503	#N/A							Akr1c13	-1.07356	0.141077	7.10879	0.00767071	0.0228779	#N/A
	Lrrc8b	1.4209	3.46022	73.1357	1.21036e-17	1.71392e-16	#N/A							Plxnb1	-1.07324	2.32994	9.08753	0.00257358	0.00905135	#N/A
	Neil2	1.4218	2.38359	33.679	6.49989e-09	4.31812e-08	#N/A							Ahrr	-1.07304	1.50625	10.4942	0.00119752	0.00463957	#N/A
	Efhd1	1.42531	0.0921219	12.0458	0.000519077	0.00161485	#N/A							Gm41130	-1.07304	0.861857	8.34148	0.00387501	0.0128673	#N/A
	Csrp1	1.42535	3.61112	23.9915	9.67611e-07	4.84163e-06	#N/A							Sult4a1	-1.0723	1.44637	8.95424	0.00276827	0.00964734	#N/A
	Rps15a-ps7	1.43458	0.893983	16.6863	4.40977e-05	0.000170303	#N/A							Gm11423	-1.06865	1.62324	10.8502	0.000987836	0.00393383	#N/A
	Cstb	1.43484	5.24783	157.337	4.32005e-36	1.72698e-34	#N/A							Gm35658	-1.06691	2.59447	13.8265	0.000200491	0.000971487	#N/A
	Ell2	1.43559	4.57995	110.394	8.03436e-26	1.88662e-24	#N/A							Ly6g5b	-1.06483	0.733309	7.79978	0.00522526	0.0165064	#N/A
	Il1b	1.44101	5.7371	31.3544	2.14972e-08	1.34344e-07	#N/A							Scarf1	-1.0637	2.10398	13.1058	0.000294389	0.00136657	#N/A
	Sparcl1	1.44744	4.93298	7.57012	0.00593437	0.0142722	#N/A							Kiss1r	-1.06226	1.65497	9.24446	0.00236209	0.00841026	#N/A
	mt-Rnr1	1.44767	6.91985	60.5148	7.30287e-15	8.76756e-14	#N/A							Fgfr2	-1.05958	1.35453	7.10623	0.00768163	0.0229009	#N/A
	Me1	1.45119	0.943927	13.1698	0.000284495	0.000938103	#N/A							Gm3558	-1.05157	1.14986	8.25473	0.0040646	0.0134087	#N/A
	Tpm4	1.45866	6.06179	202.285	6.62421e-46	3.78443e-44	#N/A							Aoah	-1.05108	2.39351	11.8772	0.000568268	0.00242174	#N/A
	Rcan2	1.46448	1.16163	13.9436	0.000188376	0.000642029	#N/A							Ttll7	-1.05086	1.28467	6.64622	0.00993664	0.0285064	#N/A
	Col16a1	1.46686	0.331	8.10878	0.00440515	0.0109416	#N/A							Gm13421	-1.0503	1.36157	8.89427	0.00286067	0.0099205	#N/A
	Diaph3	1.46836	0.673277	18.5598	1.64658e-05	6.84859e-05	#N/A							Ccdc152	-1.05024	1.24507	8.84979	0.00293122	0.0101255	#N/A
	Zfp365	1.47517	0.810642	11.4512	0.000714463	0.00215874	#N/A							Izumo4	-1.04993	3.73946	34.5853	4.07971e-09	5.0064e-08	#N/A
	Nrsn1	1.47788	0.489246	7.69632	0.00553336	0.0134137	#N/A							Kcnj12	-1.04894	3.88798	27.3541	1.69401e-07	1.60004e-06	#N/A
	Rgs20	1.47819	-0.351385	6.78519	0.00919172	0.0210243	#N/A							Hrh2	-1.04842	4.41438	39.7591	2.87297e-10	4.24281e-09	#N/A
	Thbs1	1.48869	5.19914	227.913	1.69983e-51	1.1521e-49	#N/A							Nfasc	-1.04841	2.52185	7.03457	0.00799509	0.0236361	#N/A
	Gm10819	1.48889	1.40542	21.643	3.28412e-06	1.52839e-05	#N/A							Nrip1	-1.04618	7.51363	45.8906	1.25046e-11	2.22831e-10	#N/A
	Rian	1.49439	0.441957	6.40675	0.0113687	0.0254151	#N/A							Pde4b	-1.04427	4.44732	25.3278	4.8369e-07	4.21672e-06	#N/A
	Gm6789	1.49543	0.020592	11.666	0.000636539	0.00194505	#N/A							Klk8	-1.04386	5.65418	45.5441	1.49241e-11	2.62965e-10	#N/A
	Pcsk1n	1.49849	1.85971	11.6811	0.00063138	0.00193118	#N/A							Gm52147	-1.04321	2.82384	15.7427	7.25668e-05	0.000395511	#N/A
	Cyp4f18	1.50094	3.1492	57.9573	2.67874e-14	3.05372e-13	#N/A							Ly6g6d	-1.04312	0.670106	7.44061	0.00637684	0.0195506	#N/A
	Kcna3	1.50133	2.85284	44.2736	2.85539e-11	2.44975e-10	#N/A							Cttn	-1.04272	1.00539	5.72259	0.016748	0.0439803	#N/A
	Tub	1.50137	0.290041	7.50469	0.00615383	0.0147334	#N/A							Itga2b	-1.04169	0.0345485	7.94837	0.00481306	0.015369	#N/A
	Mobp	1.5147	4.04557	7.06664	0.00785323	0.0183316	#N/A							Arl4d	-1.03982	1.93355	12.3002	0.000452911	0.00198336	#N/A
	Snhg11	1.51563	2.03727	10.8129	0.00100797	0.00294357	#N/A							Kcnab3	-1.03979	0.953734	8.8165	0.00298518	0.0102817	#N/A
	Sqle	1.51672	3.45965	110.815	6.49444e-26	1.53956e-24	#N/A							T2	-1.03838	-0.0852747	5.92875	0.0148958	0.039879	#N/A
	Zap70	1.52602	-0.300489	9.51445	0.00203861	0.00552886	#N/A							Lrrc25	-1.03819	5.86603	71.6221	2.60618e-17	9.19572e-16	#N/A
	Ube2c	1.53737	1.28555	25.8879	3.61836e-07	1.9221e-06	#N/A							Palm	-1.03708	1.96875	11.14	0.000844879	0.00343216	#N/A
	Luzp2	1.54153	0.725296	11.1715	0.000830629	0.00247019	#N/A							Gm6277	-1.03535	3.87961	30.4178	3.48309e-08	3.69432e-07	#N/A
	Ptprz1	1.54301	1.76745	11.0488	0.00088743	0.00262393	#N/A							Dbn1	-1.0327	0.463276	5.6507	0.0174484	0.0454153	#N/A
	Mdk	1.54416	1.79094	37.5496	8.91194e-10	6.48224e-09	#N/A							Cd1d1	-1.03207	3.34809	24.7345	6.57955e-07	5.59796e-06	#N/A
	Gria1	1.5477	0.579357	9.27935	0.00231752	0.00619625	#N/A							Gab1	-1.03107	6.13098	39.3828	3.48352e-10	5.08651e-09	#N/A
	Phactr3	1.55288	0.213793	10.7908	0.00102007	0.00297387	#N/A							Chrnb2	-1.03044	1.19844	8.65818	0.00325596	0.0110662	#N/A
	Sdc1	1.55584	0.0253485	12.2563	0.0004637	0.00145962	#N/A							6330409D20Rik	-1.02932	0.935962	7.63434	0.00572675	0.0178122	#N/A
	Gm15590	1.5594	1.23436	29.3988	5.89128e-08	3.47579e-07	#N/A							0610005C13Rik	-1.02911	0.485091	7.98713	0.00471111	0.0151077	#N/A
	Fuom	1.55971	2.08947	43.5656	4.09977e-11	3.46748e-10	#N/A							LOC118567870	-1.02772	2.42743	9.36487	0.00221183	0.007949	#N/A
	Ephb1	1.57114	-0.280051	6.57985	0.010314	0.0233053	#N/A							Nr1d1	-1.02615	3.51571	13.95	0.000187739	0.000918696	#N/A
	Tshz2	1.59443	-0.386196	6.85478	0.00884044	0.0203165	#N/A							4931402G19Rik	-1.02421	0.911267	9.54864	0.00200098	0.00726505	#N/A
	Ptgs2	1.59614	3.27126	19.0723	1.25856e-05	5.32381e-05	#N/A							Wnk3	-1.02356	1.23757	6.87476	0.00874216	0.0254617	#N/A
	Ifitm2	1.61062	3.86427	122.856	1.49973e-28	4.1032e-27	#N/A							Timp3	-1.02259	3.12478	8.06085	0.0045232	0.0146183	#N/A
	Pak6	1.61126	-0.120679	11.5808	0.000666368	0.00202945	#N/A							Celf4	-1.02205	2.22199	10.32	0.00131596	0.00504456	#N/A
	Gpc1	1.61967	1.53503	37.9754	7.16416e-10	5.29098e-09	#N/A							Gm46165	-1.01944	0.489358	6.4931	0.0108294	0.0306327	#N/A
	Muc3a	1.62664	0.405295	15.061	0.000104094	0.000373381	#N/A							Arhgef10l	-1.01837	4.98134	52.6017	4.08545e-13	8.90679e-12	#N/A
	Nes	1.65025	4.53986	56.4067	5.89305e-14	6.46587e-13	#N/A							Il17ra	-1.01704	7.60472	60.5729	7.0905e-15	1.8929e-13	#N/A
	Il1rn	1.65408	1.80111	34.6097	4.02903e-09	2.73823e-08	#N/A							Gm46218	-1.01672	1.39442	6.44507	0.0111261	0.0313405	#N/A
	Ankrd33b	1.65536	1.67601	25.0185	5.6784e-07	2.93485e-06	#N/A							Mir142b	-1.0167	1.24785	7.67115	0.00561106	0.0175101	#N/A
	Dtna	1.65967	1.88959	12.0527	0.000517178	0.00160995	#N/A							Gm46775	-1.01657	0.501474	8.03891	0.00457832	0.014766	#N/A
	Trnp1	1.67041	-0.00394329	10.0606	0.00151475	0.00422966	#N/A							Kazald1	-1.01649	0.210178	6.05944	0.0138322	0.0374926	#N/A
	Rpl21-ps11	1.69472	-0.29895	15.4679	8.39192e-05	0.000306096	#N/A							Znrf1	-1.0161	6.85781	63.5801	1.53978e-15	4.44619e-14	#N/A
	Gsn	1.70907	4.65905	125.914	3.21028e-29	9.20548e-28	#N/A							Emp3	-1.01563	3.75297	15.2363	9.48617e-05	0.000503828	#N/A
	Asrgl1	1.71479	3.11521	61.6873	4.02569e-15	4.90417e-14	#N/A							Pomk	-1.01509	3.94417	42.8055	6.04623e-11	9.78811e-10	#N/A
	Trim6	1.72115	0.0279997	13.0595	0.000301753	0.000986342	#N/A							1500015A07Rik	-1.01449	1.34969	6.9186	0.00853037	0.0249527	#N/A
	Arpin	1.73245	0.20536	21.7225	3.15078e-06	1.47139e-05	#N/A							Lefty1	-1.01205	3.19045	21.8034	3.02067e-06	2.253e-05	#N/A
	C920009B18Rik	1.73248	1.79289	49.0032	2.55548e-12	2.42215e-11	#N/A							Pdss1	-1.01141	3.00892	21.7184	3.15751e-06	2.34149e-05	#N/A
	Gm28913	1.74169	0.547133	19.3926	1.06419e-05	4.57428e-05	#N/A							Gm33747	-1.01126	1.22921	9.86136	0.00168787	0.00626814	#N/A
	Gm6311	1.74915	0.105515	22.7679	1.82797e-06	8.79821e-06	#N/A							Fcrlb	-1.00802	1.44924	6.1811	0.0129122	0.0354609	#N/A
	Plin2	1.75643	5.7824	302.048	1.17923e-67	1.22961e-65	#N/A							Chsy1	-1.0079	6.75348	83.4648	6.4861e-20	2.9414e-18	#N/A
	Rimklb	1.76156	0.54423	10.1295	0.00145917	0.00409056	#N/A							Per3	-1.00389	5.32745	10.4359	0.0012359	0.00476998	#N/A
	Drp2	1.79793	0.278963	15.1246	0.000100642	0.000361609	#N/A							Foxp3	-1.00095	0.197188	6.38845	0.0114865	0.0322275	#N/A
	Fbxo2	1.80176	0.256739	15.3955	8.71942e-05	0.000317497	#N/A							Apod	-1.0004	1.75404	5.85478	0.0155348	0.0412231	#N/A
	Mlc1	1.80547	1.4601	10.8464	0.000989867	0.00289353	#N/A							Lipa	1.00069	7.60695	59.4246	1.27069e-14	3.30495e-13	#N/A
	Insyn1	1.80599	-0.145582	13.8524	0.000197741	0.000671338	#N/A							Ergic3	1.00622	7.67755	58.706	1.83081e-14	4.64232e-13	#N/A
	Gcm2	1.80759	-0.344996	12.9103	0.00032677	0.00106039	#N/A							Raver2	1.00664	0.505814	5.65226	0.0174329	0.0453833	#N/A
	Rgs6	1.8157	-0.201417	13.9383	0.000188913	0.000643563	#N/A							Man2b2	1.0071	8.72998	48.6364	3.08094e-12	5.93092e-11	#N/A
	Rem1	1.83168	-0.289895	10.776	0.00102823	0.00299509	#N/A							Gm27042	1.00918	0.917518	8.48994	0.00357115	0.0119764	#N/A
	Aldoc	1.83939	3.3287	17.1867	3.38809e-05	0.000133087	#N/A							Gga2	1.00996	5.35028	67.4868	2.121e-16	6.836e-15	#N/A
	Scn3b	1.84027	-0.318967	18.0351	2.16868e-05	8.82804e-05	#N/A							Rps19-ps6	1.01302	2.44324	10.8021	0.00101382	0.00402373	#N/A
	Gm10076	1.84974	4.45544	21.8593	2.93387e-06	1.37786e-05	#N/A							Nucb1	1.02334	8.50363	58.8519	1.69994e-14	4.34944e-13	#N/A
	Rab11fip1	1.85131	2.08513	59.0296	1.55315e-14	1.81071e-13	#N/A							Clybl	1.02746	1.8948	13.0978	0.000295638	0.00137147	#N/A
	Rab15	1.85418	0.211327	10.0335	0.00153718	0.00428509	#N/A							Gm46060	1.03149	1.19609	7.45948	0.00631032	0.0193718	#N/A
	Cd44	1.8566	3.87847	175.619	4.38554e-40	1.99978e-38	#N/A							Ccl5	1.03262	2.56583	6.84731	0.00887747	0.0257864	#N/A
	Tmod2	1.85723	2.28532	23.8453	1.04397e-06	5.20973e-06	#N/A							Iqgap3	1.03738	5.15668	74.2627	6.83838e-18	2.55969e-16	#N/A
	Rph3a	1.86773	0.886251	13.671	0.000217791	0.000734061	#N/A							Gm4705	1.04757	-0.107991	5.52332	0.0187646	0.0482203	#N/A
	Ikbke	1.87706	2.7361	31.4347	2.0626e-08	1.29225e-07	#N/A							H2-T22	1.05782	5.87577	53.8041	2.21513e-13	4.95916e-12	#N/A
	Gadd45a	1.8838	1.69697	48.729	2.93885e-12	2.76649e-11	#N/A							Rpl36-ps12	1.05848	1.19968	8.80601	0.00300241	0.0103335	#N/A
	Rasl10b	1.89023	1.28877	14.6394	0.000130162	0.000459808	#N/A							Ifih1	1.062	5.59016	55.6061	8.85472e-14	2.06401e-12	#N/A
	Gadd45b	1.89086	3.6963	25.9976	3.41839e-07	1.82237e-06	#N/A							Phf11d	1.06367	4.95433	64.9427	7.7109e-16	2.33123e-14	#N/A
	B4galnt4	1.93298	-0.301204	13.5389	0.000233663	0.00078278	#N/A							Cxcl10	1.06626	3.98052	6.05675	0.0138533	0.0375327	#N/A
	Dlgap3	1.96024	1.10226	12.7681	0.000352577	0.0011372	#N/A							Dnaaf4	1.06704	-0.00772176	7.77029	0.00531124	0.0167444	#N/A
	Igfbp6	1.97652	0.188955	22.624	1.97009e-06	9.44264e-06	#N/A							Dhx58	1.07037	5.16086	54.4707	1.57784e-13	3.59498e-12	#N/A
	Sec14l5	1.97776	0.663965	7.0024	0.00814004	0.0189118	#N/A							Gm15459	1.07225	4.09526	26.8154	2.23849e-07	2.07144e-06	#N/A
	Sdr39u1	1.98581	0.0952425	20.6412	5.53911e-06	2.49377e-05	#N/A							Rpl9-ps7	1.07633	1.93318	12.1353	0.000494759	0.00214405	#N/A
	Gm42323	1.99808	-0.0425261	18.2555	1.93167e-05	7.91948e-05	#N/A							Epb41l5	1.07718	2.35528	17.7351	2.53901e-05	0.000155249	#N/A
	Gm32673	2.0369	-0.00490422	20.3367	6.49419e-06	2.88113e-05	#N/A							Maged1	1.07782	7.10895	93.3388	4.40668e-22	2.42607e-20	#N/A
	Ankrd55	2.09959	-0.152228	21.6763	3.22746e-06	1.50436e-05	#N/A							Gm31292	1.08384	0.97338	10.0953	0.0014865	0.00560419	#N/A
	H19	2.10184	1.55582	5.64056	0.0175496	0.0372024	#N/A							Hspa1b	1.08433	7.14787	19.3498	1.08831e-05	7.22594e-05	#N/A
	Plp2	2.1099	2.27346	62.3193	2.92047e-15	3.59004e-14	#N/A							Lyst	1.08755	7.07068	99.5409	1.9215e-23	1.21916e-21	#N/A
	Arhgef26	2.14804	0.0177712	17.7636	2.50117e-05	0.000100417	#N/A							Gm34432	1.0933	2.26227	14.4583	0.0001433	0.000724124	#N/A
	Il4i1	2.16015	-0.197208	23.2699	1.40789e-06	6.90336e-06	#N/A							Mb21d2	1.09367	3.0363	20.9013	4.83568e-06	3.47486e-05	#N/A
	Tst	2.18459	0.991344	46.9654	7.22522e-12	6.54527e-11	#N/A							Tgoln1	1.0954	8.32095	66.1992	4.07585e-16	1.26745e-14	#N/A
	Pla2r1	2.19785	-0.754452	9.35034	0.00222945	0.00598978	#N/A							Fnip2	1.09556	7.33568	82.5682	1.02084e-19	4.51373e-18	#N/A
	Cacna1e	2.21896	2.16667	56.6806	5.12673e-14	5.65838e-13	#N/A							Gm51770	1.09733	0.361617	8.15215	0.00430102	0.0140316	#N/A
	Adcy1	2.25619	0.567287	10.8943	0.000964621	0.00282972	#N/A							Ly6e	1.09858	10.1077	29.7225	4.98529e-08	5.14492e-07	#N/A
	F2rl1	2.26123	-0.185386	12.6171	0.000382245	0.00122231	#N/A							H2bc8	1.10073	3.04865	9.57785	0.00196939	0.00717059	#N/A
	Scg3	2.28999	1.61495	22.7363	1.85825e-06	8.93532e-06	#N/A							Mpst	1.10115	4.21507	38.5257	5.40367e-10	7.66866e-09	#N/A
	Rapgef4	2.38507	3.32861	24.1459	8.93044e-07	4.48658e-06	#N/A							Gm41107	1.10418	1.69894	9.74974	0.00179348	0.00660119	#N/A
	Mak	2.41654	-0.0553783	24.9736	5.81197e-07	2.99766e-06	#N/A							Rora	1.1079	4.18323	36.967	1.20145e-09	1.60523e-08	#N/A
	Kif5c	2.43213	2.98594	50.4434	1.2265e-12	1.20239e-11	#N/A							Npr1	1.10905	2.30879	13.9301	0.000189737	0.000927318	#N/A
	Gfra1	2.44997	0.205823	26.5459	2.57344e-07	1.39132e-06	#N/A							Cfb	1.12744	1.53819	7.88539	0.00498359	0.0158527	#N/A
	Wasf3	2.48467	2.12129	36.0179	1.95508e-09	1.3764e-08	#N/A							Xaf1	1.12838	5.42935	67.5154	2.09051e-16	6.75377e-15	#N/A
	Shc3	2.49391	0.983295	23.5553	1.21375e-06	5.99873e-06	#N/A							2210418O10Rik	1.13013	-0.0153342	8.52208	0.00350864	0.0118048	#N/A
	Vegfa	2.53984	4.26215	179.857	5.2066e-41	2.45682e-39	#N/A							H2-T23	1.13705	8.48052	58.3247	2.2224e-14	5.58522e-13	#N/A
	Acpp	2.56251	-0.385558	20.7853	5.13764e-06	2.32355e-05	#N/A							Gm14648	1.1422	0.862627	9.85917	0.00168987	0.0062692	#N/A
	Slc1a2	2.56874	5.05831	25.9218	3.55524e-07	1.89059e-06	#N/A							Chic1	1.14693	3.30889	25.7726	3.84099e-07	3.40302e-06	#N/A
	Slc7a2	2.57688	1.84328	46.4463	9.41648e-12	8.44312e-11	#N/A							Lrrc9	1.14738	2.09725	14.6469	0.00012965	0.000664402	#N/A
	Ass1	2.59237	1.72841	94.7306	2.18141e-22	4.24081e-21	#N/A							Gm21399	1.16435	0.127461	8.00219	0.00467208	0.0150171	#N/A
	Ntm	2.6098	1.30004	47.4082	5.76406e-12	5.25354e-11	#N/A							Shroom4	1.17517	0.754825	7.74017	0.00540058	0.0169655	#N/A
	Stra6l	2.66098	1.50792	38.367	5.86141e-10	4.38752e-09	#N/A							Gm30189	1.18554	1.0937	10.1217	0.00146534	0.00553915	#N/A
	Col2a1	2.68587	-0.0303568	16.2262	5.62103e-05	0.000212351	#N/A							LOC118567384	1.1947	1.00533	6.34041	0.0118017	0.0329225	#N/A
	Ddn	2.71538	2.31142	22.5866	2.00876e-06	9.61562e-06	#N/A							Socs6	1.19568	6.8306	115.333	6.65192e-27	5.70412e-25	#N/A
	Pgk1-rs7	2.75411	-0.391531	31.1394	2.40153e-08	1.49143e-07	#N/A			530				Amotl2	1.20527	1.95581	12.3156	0.000449198	0.00197137	#N/A
	Rims1	2.86021	1.71863	25.6179	4.16163e-07	2.19195e-06	#N/A							Stat2	1.21686	6.62447	53.971	2.03473e-13	4.56249e-12	#N/A
	Ptprt	2.96281	1.09402	46.2509	1.04039e-11	9.28383e-11	#N/A							Clec1b	1.21741	0.39649	7.50125	0.00616562	0.0189853	#N/A
	Lgals3	3.03009	5.06273	321.051	8.5514e-72	1.02831e-69	#N/A							Pcdhga7	1.23224	1.08336	15.1801	9.77254e-05	0.000517678	#N/A
	Slc41a2	3.17025	1.52287	71.136	3.33434e-17	4.62927e-16	#N/A							Atp6v0c-ps2	1.2584	0.975477	13.1966	0.000280452	0.00130745	#N/A
	Gm30474	3.17604	-0.023443	28.3727	1.00069e-07	5.74338e-07	#N/A							Adcy4	1.26106	1.99716	8.47063	0.00360926	0.0120755	#N/A
	Mir155hg	3.4058	-0.499645	33.5821	6.83168e-09	4.52542e-08	#N/A							Zfp541	1.2791	0.883463	12.6742	0.000370733	0.00167001	#N/A
	Stac2	3.48042	1.39541	90.1423	2.21637e-21	4.01559e-20	#N/A							Rps13-ps1	1.2862	1.02122	13.7734	0.000206235	0.000996157	#N/A
	Selenbp2	3.96282	-0.0488543	41.5641	1.1407e-10	9.24905e-10	#N/A							Lrfn3	1.28637	2.90803	18.9998	1.30735e-05	8.57169e-05	#N/A
	LOC118568382	4.06276	-0.656579	36.0695	1.90406e-09	1.34175e-08	#N/A							Gdap10	1.28929	2.77117	28.9074	7.59241e-08	7.608e-07	#N/A
	Scrg1	4.10142	-0.368189	38.4608	5.58635e-10	4.19005e-09	#N/A							F830016B08Rik	1.30063	3.90637	20.1545	7.14337e-06	4.93032e-05	#N/A
	Spp1	6.90458	9.35979	357.681	9.00628e-80	1.29128e-77	#N/A							Ifi208	1.32259	1.22339	12.309	0.000450775	0.00197584	#N/A
	Atp6v0d2	8.20447	4.48754	736.084	4.25835e-162	1.54869e-159	#N/A							LOC115487221	1.33856	0.567679	12.2384	0.000468159	0.00203752	#N/A
	Gpnmb	9.47735	8.81468	917.417	1.60568e-201	8.25594e-199	#N/A							H3c15	1.34215	-0.0529139	8.22866	0.0041234	0.0135679	#N/A
														H2bc6	1.34733	2.17711	15.6292	7.70537e-05	0.000416671	#N/A
														AY512915	1.35593	-0.332717	6.92004	0.00852349	0.0249377	#N/A
														Rps18-ps4	1.37215	0.24895	12.9984	0.000311761	0.0014359	#N/A
														Itgad	1.3756	-0.0471698	9.29156	0.00230212	0.00824416	#N/A
														Gpc4	1.37935	0.75322	5.50984	0.0189097	0.0485051	#N/A
														Gbp2	1.41377	4.3165	17.8344	2.40991e-05	0.00014793	#N/A
														Rpl17-ps9	1.41799	0.0903827	11.2215	0.000808544	0.00330543	#N/A
														Cxcr6	1.42394	0.650737	13.5305	0.000234713	0.00111854	#N/A
														H3c14	1.44515	0.508242	16.8599	4.02418e-05	0.000236356	#N/A
														Nek5	1.45143	1.40231	21.319	3.88858e-06	2.84632e-05	#N/A
														Cxcl9	1.45755	2.24447	14.1183	0.000171663	0.000848955	#N/A
														Gm13680	1.46216	3.15134	35.2433	2.90978e-09	3.6631e-08	#N/A
														Atf3	1.46775	7.4355	53.3495	2.79177e-13	6.16237e-12	#N/A
														Pdyn	1.47091	0.890672	9.06589	0.00260422	0.0091432	#N/A
														Gm52775	1.48458	1.09255	17.279	3.2273e-05	0.000193405	#N/A
														TrnN	1.50426	0.956747	15.8563	6.83373e-05	0.000374914	#N/A
														Gm36897	1.5222	1.44172	20.202	6.96812e-06	4.82584e-05	#N/A
														Rtp4	1.56646	5.05615	67.725	1.87962e-16	6.11374e-15	#N/A
														H3c4	1.59583	0.0703778	17.4961	2.87897e-05	0.000174602	#N/A
														H2ac7	1.60091	0.0178873	13.1136	0.000293167	0.00136135	#N/A
														Rpl34-ps1	1.72079	5.54365	28.4625	9.55287e-08	9.4125e-07	#N/A
														Gbp4	1.74339	2.8974	21.999	2.72795e-06	2.05635e-05	#N/A
														H1f4	1.75087	1.05169	13.0037	0.000310872	0.00143231	#N/A
														Col3a1	1.76364	-0.0918804	13.0758	0.000299143	0.001385	#N/A
														Zfp9	1.8012	0.132388	22.4763	2.12758e-06	1.63515e-05	#N/A
														TrnW	1.9128	-0.165935	11.6219	0.00065181	0.0027315	#N/A
														Nptxr	1.93034	1.38073	26.4295	2.73328e-07	2.49504e-06	#N/A
[truncated: 14 more rows]

## Sheet: Male 5X compare
IH 5X v IH WT	Gene name	logFC	logCPM	LR	PValue	FDR			NX 5X vs WT	Gene Name	logFC	logCPM	LR	PValue	FDR
	1110008P14Rik	2.23862	2.84481	45.0176	1.95276e-11	2.09784e-10	1110008P14Rik			1110008P14Rik	1.12574	2.71441	11.7086	0.000622135	0.00543827	1110008P14Rik
	1500009C09Rik	3.62348	1.55959	28.7959	8.04231e-08	5.38813e-07	1500009C09Rik			1500009C09Rik	3.7336	2.18245	42.7053	6.36398e-11	2.4843e-09	1500009C09Rik
	1700003F12Rik	2.60887	3.55342	42.9985	5.47806e-11	5.56191e-10	1700003F12Rik			1700003F12Rik	1.51268	3.25577	18.6441	1.57538e-05	0.000230238	1700003F12Rik
	1700009J07Rik	-1.16472	1.04765	7.3224	0.00681004	0.0161418	1700009J07Rik			1700009J07Rik	-1.21512	1.19603	8.05783	0.00453075	0.027934	1700009J07Rik
	1700020L24Rik	-1.98378	1.35253	19.5221	9.94434e-06	4.64059e-05	1700020L24Rik			1700020L24Rik	-1.70621	2.04713	10.4612	0.00121906	0.00954931	1700020L24Rik
	2010109I03Rik	-1.24347	1.2947	5.6934	0.0170288	0.0356911	2010109I03Rik			2010109I03Rik	-1.15547	2.03428	8.08086	0.00447353	0.027675	2010109I03Rik
	2010111I01Rik	1.51872	4.86913	61.2946	4.91425e-15	7.7009e-14	2010111I01Rik			2010111I01Rik	1.1241	4.85202	32.1632	1.41753e-08	4.06725e-07	2010111I01Rik
	2310002F09Rik	-2.29022	-0.406579	10.3609	0.00128716	0.0037153	2310002F09Rik			2310002F09Rik	-2.10638	0.341081	11.453	0.00071378	0.0060992	2310002F09Rik
	2310034O05Rik	3.60348	0.617218	49.9888	1.54624e-12	1.89822e-11	2310034O05Rik			2310034O05Rik	3.31837	0.438351	14.7311	0.000123982	0.00139329	2310034O05Rik
	2900052N01Rik	5.20446	2.53374	124.198	7.62469e-29	3.21345e-27	2900052N01Rik			2900052N01Rik	7.4483	2.88765	147.614	5.76112e-34	1.29486e-31	2900052N01Rik
	4833418N02Rik	-1.06882	2.06989	12.9912	0.000312962	0.00104933	4833418N02Rik			4833418N02Rik	-1.33531	2.44414	13.6577	0.000219343	0.00225797	4833418N02Rik
	4930516B21Rik	-1.17811	3.83793	39.4722	3.3277e-10	3.07091e-09	4930516B21Rik			4930516B21Rik	-1.52703	3.26055	31.797	1.71154e-08	4.82681e-07	4930516B21Rik
	4930556M19Rik	2.3535	1.47195	40.4285	2.03942e-10	1.92774e-09	4930556M19Rik			4930556M19Rik	3.2251	2.01722	74.9348	4.8652e-18	4.27044e-16	4930556M19Rik
	8030442B05Rik	-1.81951	2.78664	45.5145	1.51513e-11	1.6529e-10	8030442B05Rik			8030442B05Rik	-1.1223	2.74792	12.5525	0.000395685	0.00367769	8030442B05Rik
	9130214F15Rik	1.99336	0.843295	13.5737	0.000229378	0.000796337	9130214F15Rik			9130214F15Rik	1.56613	0.908693	8.81303	0.00299086	0.0199489	9130214F15Rik
	9330159M07Rik	-1.87053	1.44414	24.9663	5.83415e-07	3.40317e-06	9330159M07Rik			9330159M07Rik	-1.15294	2.07675	8.18424	0.00422559	0.026426	9330159M07Rik
	9330175E14Rik	1.62349	1.70567	25.1256	5.37161e-07	3.15326e-06	9330175E14Rik			9330175E14Rik	2.36717	1.49872	22.1499	2.52164e-06	4.47976e-05	9330175E14Rik
	A430093F15Rik	4.38174	2.2539	127.78	1.25372e-29	5.47088e-28	A430093F15Rik			A430093F15Rik	4.09061	2.24015	50.1859	1.39847e-12	6.51604e-11	A430093F15Rik
	A830008E24Rik	-1.30468	3.26332	32.7914	1.02596e-08	7.84751e-08	A830008E24Rik			A830008E24Rik	-1.1059	3.38758	16.3518	5.2605e-05	0.000670397	A830008E24Rik
	A930002C04Rik	2.85575	-0.024039	17.2367	3.29998e-05	0.00013892	A930002C04Rik			A930002C04Rik	3.56159	0.205869	17.0393	3.66139e-05	0.00048918	A930002C04Rik
	AA414768	1.84966	1.82511	36.112	1.86295e-09	1.5561e-08	AA414768			AA414768	1.22084	1.85997	11.1653	0.000833401	0.00692974	AA414768
	Abcg3	-1.59231	3.63996	60.3786	7.82609e-15	1.19846e-13	Abcg3			Abcg3	-1.15773	3.58187	19.6019	9.53768e-06	0.000146613	Abcg3
	Abhd15	-1.09896	4.84472	29.2016	6.52269e-08	4.43633e-07	Abhd15			Abhd15	-1.18433	4.45235	25.5091	4.40294e-07	9.27745e-06	Abhd15
	Abi3bp	3.94557	1.60998	43.5655	4.09994e-11	4.23241e-10	Abi3bp			Abi3bp	3.68387	1.28921	25.4022	4.6539e-07	9.79234e-06	Abi3bp
	Acaca	3.58059	6.02932	493.539	2.42032e-109	1.49183e-106	Acaca			Acaca	3.84814	6.00836	240.202	3.55371e-54	1.55046e-51	Acaca
	Acot1	1.93355	1.35121	33.2135	8.2577e-09	6.40464e-08	Acot1			Acot1	1.3902	1.30433	8.70409	0.00317497	0.0209143	Acot1
	Actn1	-1.25683	4.85732	63.2962	1.77851e-15	2.90713e-14	Actn1			Actn1	-1.50251	5.11862	55.0465	1.17714e-13	6.3497e-12	Actn1
	Actr3b	5.85001	4.7605	294.668	4.77961e-66	1.05529e-63	Actr3b			Actr3b	5.88234	4.98588	304.915	2.79953e-68	1.80557e-65	Actr3b
	Adamts1	1.9743	4.96081	55.5786	8.97967e-14	1.24378e-12	Adamts1			Adamts1	1.99633	4.55823	50.665	1.09557e-12	5.29372e-11	Adamts1
	Adamtsl2	-2.11398	2.81365	53.5228	2.55614e-13	3.34629e-12	Adamtsl2			Adamtsl2	-1.70812	2.82046	17.5818	2.75213e-05	0.000380122	Adamtsl2
	Adap1	1.795	6.21056	135.585	2.4595e-31	1.16988e-29	Adap1			Adap1	1.3407	6.32203	47.039	6.95894e-12	3.01839e-10	Adap1
	Adarb1	2.25857	5.79578	118.413	1.40767e-27	5.4512e-26	Adarb1			Adarb1	2.44968	5.3208	95.5533	1.43964e-22	1.80979e-20	Adarb1
	Adcy3	1.07967	3.88561	26.1178	3.2121e-07	1.9482e-06	Adcy3			Adcy3	1.3703	3.87739	22.0596	2.64315e-06	4.66213e-05	Adcy3
	Adcy8	-2.47655	3.09306	88.7402	4.50226e-21	1.18088e-19	Adcy8			Adcy8	-2.11306	3.34886	44.8674	2.10838e-11	8.76069e-10	Adcy8
	Adora1	3.22584	2.96805	104.669	1.44378e-24	4.68374e-23	Adora1			Adora1	3.36708	3.23918	87.1162	1.02328e-20	1.11613e-18	Adora1
	Adrb2	-1.2997	6.95543	92.6699	6.17856e-22	1.71481e-20	Adrb2			Adrb2	-1.2178	6.83521	71.4591	2.83071e-17	2.28211e-15	Adrb2
	Adssl1	2.94213	6.52736	305.964	1.65404e-68	4.14716e-66	Adssl1			Adssl1	1.99257	6.54172	106.332	6.23562e-25	9.15833e-23	Adssl1
	AF529169	4.02172	4.80753	402.253	1.78071e-89	7.31724e-87	AF529169			AF529169	4.3822	4.89776	252.648	6.8737e-57	3.18639e-54	AF529169
	Afm	-2.38604	1.97469	56.6094	5.31576e-14	7.54665e-13	Afm			Afm	-1.67492	1.90684	15.8763	6.76219e-05	0.000824921	Afm
	Agap1	1.95152	4.76066	148.133	4.43634e-34	2.50484e-32	Agap1			Agap1	1.42144	4.54256	50.7783	1.03413e-12	5.01317e-11	Agap1
	Ahnak2	5.08491	2.41092	156.064	8.19568e-36	5.13723e-34	Ahnak2			Ahnak2	4.35028	2.07709	59.3133	1.34461e-14	8.20823e-13	Ahnak2
	Aifm2	1.64984	1.5182	14.278	0.000157699	0.000567877	Aifm2			Aifm2	2.05875	1.75391	27.9046	1.27445e-07	3.02557e-06	Aifm2
	Ak4	2.70464	1.47321	29.6381	5.20701e-08	3.60615e-07	Ak4			Ak4	3.98073	1.68294	30.4661	3.39759e-08	9.09745e-07	Ak4
	Akap1	1.09439	4.95989	68.8399	1.06791e-16	1.97718e-15	Akap1			Akap1	1.20229	5.20093	43.591	4.04688e-11	1.63574e-09	Akap1
	Akap5	1.30018	3.46034	48.1988	3.85114e-12	4.48229e-11	Akap5			Akap5	1.78077	3.48112	32.9929	9.24969e-09	2.73872e-07	Akap5
	Akt3	1.12086	5.23684	26.8872	2.15682e-07	1.34852e-06	Akt3			Akt3	1.89751	5.13723	50.0358	1.50969e-12	6.99837e-11	Akt3
	Alb	-1.2726	0.368928	6.49856	0.0107962	0.0240996	Alb			Alb	-2.20459	0.840456	14.6692	0.000128124	0.00142902	Alb
	Alcam	2.50085	3.49778	113.792	1.44713e-26	5.2598e-25	Alcam			Alcam	2.52289	3.21594	57.6521	3.12836e-14	1.80569e-12	Alcam
	Aldh1a1	4.31055	2.78846	89.8041	2.62949e-21	7.034e-20	Aldh1a1			Aldh1a1	4.53463	3.30024	72.2447	1.90101e-17	1.56664e-15	Aldh1a1
	Aldh2	1.89539	7.20936	248.51	5.48504e-56	9.65955e-54	Aldh2			Aldh2	1.12239	7.24886	33.6401	6.63099e-09	2.01566e-07	Aldh2
	Aldoa	2.26883	9.72272	203.203	4.17729e-46	4.75343e-44	Aldoa			Aldoa	1.39758	9.6366	38.7477	4.82285e-10	1.70745e-08	Aldoa
	Aldoc	1.08716	3.85558	7.26126	0.00704578	0.0166101	Aldoc			Aldoc	2.36707	3.90071	23.1489	1.49932e-06	2.79197e-05	Aldoc
	Alkbh2	1.94226	3.52929	66.3574	3.76151e-16	6.58508e-15	Alkbh2			Alkbh2	1.15006	3.40675	16.2503	5.55011e-05	0.000695946	Alkbh2
	Angptl7	-1.12336	3.52185	22.6518	1.94177e-06	1.03962e-05	Angptl7			Angptl7	-1.35041	3.54828	32.3526	1.28582e-08	3.70366e-07	Angptl7
	Ank	4.27202	9.20263	851.267	3.85568e-187	8.14816e-184	Ank			Ank	4.06172	8.99743	439.026	1.76356e-97	2.01235e-94	Ank
	Ankrd37	1.50801	1.88714	12.6089	0.000383908	0.00126259	Ankrd37			Ankrd37	1.17786	1.91241	9.72158	0.00182117	0.0133211	Ankrd37
	Ano7	-1.08155	3.96527	26.3972	2.77936e-07	1.70886e-06	Ano7			Ano7	-1.23944	4.34412	32.3834	1.26561e-08	3.65966e-07	Ano7
	Anp32b	1.41046	6.4003	121.514	2.94884e-28	1.19513e-26	Anp32b			Anp32b	1.01258	6.40528	25.3472	4.78852e-07	1.00329e-05	Anp32b
	Antxr2	2.18818	3.3986	121.116	3.6045e-28	1.4529e-26	Antxr2			Antxr2	2.03351	3.61442	76.2976	2.43983e-18	2.16721e-16	Antxr2
	Anxa2	3.16385	5.46926	347.435	1.53351e-77	4.72607e-75	Anxa2			Anxa2	1.81134	5.38601	38.4268	5.68476e-10	1.99356e-08	Anxa2
	Anxa4	1.46703	5.03259	121.541	2.90938e-28	1.18237e-26	Anxa4			Anxa4	1.15861	5.00107	45.1536	1.82172e-11	7.59085e-10	Anxa4
	Anxa5	2.72054	7.28151	416.16	1.67193e-92	7.27437e-90	Anxa5			Anxa5	1.93488	7.20791	112.961	2.20064e-26	3.43624e-24	Anxa5
	Apbb2	1.66169	6.2914	185.3	3.37514e-42	3.16003e-40	Apbb2			Apbb2	1.65843	6.24756	95.499	1.47966e-22	1.84447e-20	Apbb2
	Aplp2	2.46958	8.48711	330.952	5.96169e-74	1.72924e-71	Aplp2			Aplp2	2.46428	8.41926	222.269	2.89427e-50	1.12983e-47	Aplp2
	Apobec2	-1.69266	0.937673	13.3192	0.000262703	0.000897083	Apobec2			Apobec2	-2.63282	1.57309	30.2728	3.75345e-08	9.94262e-07	Apobec2
	Apoc1	2.48428	1.01557	21.2183	4.09842e-06	2.06358e-05	Apoc1			Apoc1	1.6759	0.965885	8.03485	0.00458858	0.0282318	Apoc1
	Apoc4	7.05118	2.12725	56.7723	4.893e-14	7.01378e-13	Apoc4			Apoc4	6.5315	0.954609	64.0352	1.22217e-15	8.20347e-14	Apoc4
	Apoe	4.38757	13.8787	384.522	1.28969e-85	4.76961e-83	Apoe			Apoe	3.28092	13.5808	115.525	6.04006e-27	9.63422e-25	Apoe
	Arap2	1.87327	4.70799	110.528	7.50808e-26	2.6257e-24	Arap2			Arap2	2.32965	5.0027	80.5085	2.89457e-19	2.78819e-17	Arap2
	Arhgap24	2.1516	4.90653	160.252	9.96943e-37	6.61335e-35	Arhgap24			Arhgap24	2.09989	5.0414	137.552	9.13203e-32	1.78243e-29	Arhgap24
	Arhgap26	2.0902	3.87941	113.302	1.85329e-26	6.7031e-25	Arhgap26			Arhgap26	2.14162	3.73081	59.0039	1.5736e-14	9.4124e-13	Arhgap26
	Arhgap27os3	-1.00369	3.36756	12.6773	0.000370119	0.00122132	Arhgap27os3			Arhgap27os3	-1.08173	3.60569	16.3823	5.17657e-05	0.000661156	Arhgap27os3
	Arhgef5	1.29497	2.16044	14.5739	0.000134771	0.000492386	Arhgef5			Arhgef5	1.30202	2.18066	13.6677	0.000218172	0.00225217	Arhgef5
	Armc2	1.93356	1.66798	41.2125	1.36545e-10	1.31419e-09	Armc2			Armc2	2.41145	2.00835	29.8383	4.69615e-08	1.22862e-06	Armc2
	Arnt2	3.93854	4.56216	385.687	7.19171e-86	2.72787e-83	Arnt2			Arnt2	3.92288	4.61888	225.153	6.79949e-51	2.72604e-48	Arnt2
	Arrdc4	1.62213	5.5403	72.6364	1.5588e-17	3.0828e-16	Arrdc4			Arrdc4	2.17256	5.27348	114.738	8.98149e-27	1.41736e-24	Arrdc4
	Asb10	2.8288	5.86017	355.438	2.77324e-79	9.11656e-77	Asb10			Asb10	2.26794	5.83804	126.03	3.0282e-29	5.41208e-27	Asb10
	Asb11	6.06091	1.3805	123.411	1.13372e-28	4.71099e-27	Asb11			Asb11	7.72217	1.00825	86.2286	1.60293e-20	1.72303e-18	Asb11
	Asb2	-1.14503	6.33833	48.4992	3.30422e-12	3.88548e-11	Asb2			Asb2	-1.49822	6.6082	70.7411	4.0731e-17	3.26597e-15	Asb2
	Asrgl1	1.83863	3.26091	54.348	1.67945e-13	2.23821e-12	Asrgl1			Asrgl1	2.45513	3.61392	70.5371	4.51702e-17	3.58318e-15	Asrgl1
	Ass1	3.18666	1.67768	34.978	3.33444e-09	2.69838e-08	Ass1			Ass1	2.29737	1.42212	16.2971	5.41456e-05	0.00068299	Ass1
	Atf5	2.16182	4.00925	114.992	7.89985e-27	2.93624e-25	Atf5			Atf5	1.54512	4.13137	18.7629	1.4802e-05	0.000218264	Atf5
	Atox1	2.19068	6.70903	119.397	8.57531e-28	3.35594e-26	Atox1			Atox1	1.03352	6.54667	19.8872	8.21497e-06	0.000129227	Atox1
	Atp10a	2.01336	2.89614	40.8785	1.61995e-10	1.54805e-09	Atp10a			Atp10a	2.03151	3.12423	20.523	5.89188e-06	9.61497e-05	Atp10a
	Atp1a3	4.59317	7.51921	922.04	1.587e-202	3.91276e-199	Atp1a3			Atp1a3	3.74654	7.48844	299.811	3.62179e-67	2.14903e-64	Atp1a3
	Atp2a1	1.28864	0.563274	7.21021	0.00724902	0.0170133	Atp2a1			Atp2a1	1.57231	0.595767	7.50332	0.00615853	0.0356162	Atp2a1
	Atp5k	1.74262	4.49025	42.0156	9.05462e-11	8.94756e-10	Atp5k			Atp5k	1.01012	4.12504	9.52534	0.00202654	0.0144987	Atp5k
	Atp6v0d2	6.99504	3.91726	447.013	3.22203e-99	1.48948e-96	Atp6v0d2			Atp6v0d2	7.14719	3.72127	308.828	3.93088e-69	2.7767e-66	Atp6v0d2
	Atp6v1a	1.00808	6.71703	63.8892	1.31619e-15	2.17061e-14	Atp6v1a			Atp6v1a	1.22552	6.71121	53.433	2.67566e-13	1.37338e-11	Atp6v1a
	Axl	4.12725	8.76052	735.078	7.04814e-162	7.44737e-159	Axl			Axl	3.93976	8.72911	360.518	2.17219e-80	2.14815e-77	Axl
	B2m	2.01719	11.8366	114.435	1.04643e-26	3.86994e-25	B2m			B2m	1.21927	11.8129	23.3684	1.33758e-06	2.52761e-05	B2m
	B3gnt7	1.93225	2.88493	37.3376	9.93491e-10	8.62483e-09	B3gnt7			B3gnt7	1.58054	3.29494	26.6112	2.48792e-07	5.47565e-06	B3gnt7
	B430319F04Rik	-1.31703	-0.0112147	5.02153	0.025034	0.0498961	B430319F04Rik			B430319F04Rik	-1.92626	0.579513	7.77797	0.00528873	0.0315834	B430319F04Rik
	Baalc	2.42615	1.26365	22.0803	2.61483e-06	1.36285e-05	Baalc			Baalc	3.44264	0.944571	32.0199	1.52603e-08	4.3701e-07	Baalc
	Bag1	1.67823	6.93379	131.54	1.88622e-30	8.69247e-29	Bag1			Bag1	1.03826	6.96327	22.9356	1.67517e-06	3.06907e-05	Bag1
	Baiap2l2	8.66185	7.36879	347.589	1.41937e-77	4.46739e-75	Baiap2l2			Baiap2l2	7.46265	7.0914	302.127	1.1334e-67	7.00539e-65	Baiap2l2
	Bambi	3.48028	3.34288	206.452	8.16465e-47	9.66237e-45	Bambi			Bambi	3.00623	3.10182	92.6311	6.3008e-22	7.59887e-20	Bambi
	Bank1	-2.11457	4.71727	151.385	8.63538e-35	5.06917e-33	Bank1			Bank1	-1.75335	5.13242	81.2097	2.02992e-19	1.99416e-17	Bank1
	BC035044	-1.19369	5.84925	68.1469	1.51756e-16	2.76468e-15	BC035044			BC035044	-1.28456	5.97826	47.4487	5.64617e-12	2.47797e-10	BC035044
	Bcar3	2.65166	2.96984	98.0701	4.03832e-23	1.19958e-21	Bcar3			Bcar3	2.84584	3.14853	89.5325	3.01649e-21	3.36441e-19	Bcar3
	Bcas1	3.58153	1.9257	69.337	8.29984e-17	1.54634e-15	Bcas1			Bcas1	4.56565	2.63749	68.6418	1.18073e-16	8.89085e-15	Bcas1
	Bcat1	-2.51693	0.305786	20.3556	6.43032e-06	3.12804e-05	Bcat1			Bcat1	-1.6753	0.37522	7.20035	0.00728893	0.0408787	Bcat1
	Bcl2	2.0118	4.0703	99.6826	1.78887e-23	5.445e-22	Bcl2			Bcl2	1.64631	4.41158	39.0103	4.21566e-10	1.50325e-08	Bcl2
	Bcl2a1d	2.46105	3.66961	112.945	2.21895e-26	7.9672e-25	Bcl2a1d			Bcl2a1d	1.32693	3.64443	19.1083	1.23506e-05	0.000185059	Bcl2a1d
	Begain	1.3991	-0.0177	7.4005	0.00652056	0.0155278	Begain			Begain	2.04736	0.33666	7.12529	0.0076004	0.0422739	Begain
	Bend5	-1.00202	2.23044	12.3299	0.000445757	0.00144607	Bend5			Bend5	-1.01914	2.68792	9.01101	0.00268359	0.0182775	Bend5
	Bex3	2.12193	3.9688	100.957	9.40181e-24	2.90357e-22	Bex3			Bex3	1.19048	3.91464	16.5119	4.83449e-05	0.000624693	Bex3
	Bhlhe40	4.43779	5.48158	335.326	6.64871e-75	2.00723e-72	Bhlhe40			Bhlhe40	4.51035	5.51413	308.384	4.91099e-69	3.31135e-66	Bhlhe40
	Bnc2	-1.77846	-0.2446	6.2482	0.0124319	0.027201	Bnc2			Bnc2	-2.17822	-0.174927	7.25663	0.00706398	0.039843	Bnc2
	Bri3bp	1.73235	5.33667	108.904	1.70377e-25	5.83423e-24	Bri3bp			Bri3bp	1.30537	5.24287	54.8445	1.30453e-13	6.98606e-12	Bri3bp
	Bst2	1.93058	7.22801	94.8278	2.07685e-22	5.90824e-21	Bst2			Bst2	1.13093	7.33999	18.0807	2.11742e-05	0.000299426	Bst2
	Btla	2.65224	2.66387	56.1082	6.85892e-14	9.59924e-13	Btla			Btla	1.92806	2.01202	15.9536	6.49142e-05	0.000798456	Btla
	C030034L19Rik	2.91441	2.74046	83.7115	5.72516e-20	1.38612e-18	C030034L19Rik			C030034L19Rik	2.64002	1.9748	33.994	5.52815e-09	1.70134e-07	C030034L19Rik
	C3	2.34293	4.09914	73.923	8.12238e-18	1.6573e-16	C3			C3	1.31441	4.21046	23.05	1.57841e-06	2.91583e-05	C3
	C77080	3.82771	2.8888	117.248	2.53375e-27	9.66026e-26	C77080			C77080	3.59735	2.44558	49.4502	2.03475e-12	9.34475e-11	C77080
	Cacna1a	3.44618	6.3263	325.768	8.02557e-73	2.19856e-70	Cacna1a			Cacna1a	3.23445	6.13531	118.136	1.61868e-27	2.63863e-25	Cacna1a
	Cacnb2	-1.73261	3.32644	71.1995	3.22865e-17	6.21893e-16	Cacnb2			Cacnb2	-1.63351	3.12101	27.8328	1.32264e-07	3.11665e-06	Cacnb2
	Cacnb4	1.57578	2.48441	17.8852	2.34638e-05	0.00010164	Cacnb4			Cacnb4	2.08915	2.41922	18.2694	1.91767e-05	0.00027379	Cacnb4
	Cadm1	1.61121	8.21809	169.713	8.54593e-39	6.28955e-37	Cadm1			Cadm1	1.46488	8.15299	91.92	9.025e-22	1.06287e-19	Cadm1
	Cadm4	1.84908	3.75744	72.9979	1.2979e-17	2.59107e-16	Cadm4			Cadm4	1.85206	3.62011	38.1398	6.5853e-10	2.28774e-08	Cadm4
	Capg	3.71735	7.36712	401.932	2.0914e-89	8.36166e-87	Capg			Capg	2.27636	7.09775	104.519	1.55685e-24	2.19946e-22	Capg
	Capn1	1.56512	4.38819	107.021	4.40564e-25	1.47117e-23	Capn1			Capn1	1.41456	4.41663	36.4164	1.59356e-09	5.28834e-08	Capn1
	Cass4	-2.01009	4.28522	64.5751	9.2924e-16	1.548e-14	Cass4			Cass4	-1.80864	4.65092	62.355	2.86808e-15	1.84979e-13	Cass4
	Ccdc152	-1.43653	1.1647	11.9344	0.00055108	0.0017434	Ccdc152			Ccdc152	-1.84833	1.04096	10.5046	0.00119078	0.00940079	Ccdc152
	Ccdc162	-1.87785	3.18202	36.5744	1.46946e-09	1.24144e-08	Ccdc162			Ccdc162	-2.26957	3.65237	68.3272	1.385e-16	1.02697e-14	Ccdc162
	Ccdc62	-1.06054	4.03653	34.4529	4.36691e-09	3.49944e-08	Ccdc62			Ccdc62	-1.05597	4.06443	20.9013	4.83556e-06	8.05058e-05	Ccdc62
	Cck	4.74267	2.9898	218.343	2.07931e-49	2.67472e-47	Cck			Cck	4.75765	2.9691	76.7996	1.89213e-18	1.71145e-16	Cck
	Ccl3	3.35302	8.70988	145.227	1.91543e-33	1.01559e-31	Ccl3			Ccl3	2.58595	8.25782	102.822	3.66707e-24	4.99058e-22	Ccl3
	Ccl4	2.93365	7.87364	154.876	1.49021e-35	9.22369e-34	Ccl4			Ccl4	2.29727	7.38231	88.5888	4.86033e-21	5.3406e-19	Ccl4
	Ccl6	3.25808	9.08004	293.65	7.96621e-66	1.733e-63	Ccl6			Ccl6	2.12266	8.94232	104.792	1.3566e-24	1.93498e-22	Ccl6
	Ccr1l1	-3.94567	0.709018	55.3656	1.00073e-13	1.37581e-12	Ccr1l1			Ccr1l1	-1.63231	1.08372	8.62631	0.00331342	0.021643	Ccr1l1
	Ccr3	-2.23546	0.837667	18.6608	1.5616e-05	7.0066e-05	Ccr3			Ccr3	-2.23307	1.16346	14.1722	0.000166821	0.00180235	Ccr3
	Cd200r4	4.54222	4.35794	436.1	7.64424e-97	3.4267e-94	Cd200r4			Cd200r4	4.22429	4.24438	174.895	6.31014e-40	1.87209e-37	Cd200r4
	Cd209a	-1.60418	3.89787	42.4684	7.1834e-11	7.18e-10	Cd209a			Cd209a	-2.14871	4.1127	81.8175	1.49249e-19	1.49592e-17	Cd209a
	Cd209g	-1.15549	1.92457	9.1388	0.00250245	0.00666885	Cd209g			Cd209g	-1.31528	1.90477	9.78619	0.00175828	0.012912	Cd209g
	Cd22	1.71464	5.59649	78.6073	7.57692e-19	1.68296e-17	Cd22			Cd22	1.19046	5.65129	42.8707	5.84809e-11	2.29499e-09	Cd22
	Cd274	2.21346	5.37117	239.336	5.4879e-54	8.45651e-52	Cd274			Cd274	2.22778	5.42201	165.329	7.75282e-38	2.09101e-35	Cd274
	Cd28	3.03072	2.61987	51.5088	7.12758e-13	8.99644e-12	Cd28			Cd28	2.3672	2.18149	38.1678	6.49155e-10	2.26046e-08	Cd28
	Cd300lb	1.89888	2.74242	63.0912	1.97354e-15	3.20467e-14	Cd300lb			Cd300lb	1.57484	2.89137	23.2488	1.42343e-06	2.66269e-05	Cd300lb
	Cd300lf	2.48931	4.22253	117.14	2.67441e-27	1.01442e-25	Cd300lf			Cd300lf	2.63648	4.30686	107.21	4.00338e-25	5.99859e-23	Cd300lf
	Cd34	1.49116	8.83447	148.325	4.02894e-34	2.28353e-32	Cd34			Cd34	1.13562	8.80945	50.582	1.14287e-12	5.4865e-11	Cd34
	Cd46	-1.50543	1.98359	20.3474	6.45817e-06	3.14055e-05	Cd46			Cd46	-1.45413	2.14389	16.64	4.5188e-05	0.000589033	Cd46
	Cd5	5.23426	3.18752	230.972	3.65941e-52	5.30723e-50	Cd5			Cd5	5.217	3.35183	99.7928	1.69201e-23	2.20169e-21	Cd5
	Cd52	3.35463	7.91375	243.895	5.56487e-55	9.1468e-53	Cd52			Cd52	1.86828	7.50912	67.3044	2.32658e-16	1.66727e-14	Cd52
	Cd63	2.77344	9.34049	242.659	1.03491e-54	1.66407e-52	Cd63			Cd63	1.88808	9.15347	55.9009	7.62188e-14	4.25049e-12	Cd63
	Cd63-ps	2.85225	5.79813	243.813	5.79773e-55	9.42482e-53	Cd63-ps			Cd63-ps	1.83806	5.67154	59.512	1.21552e-14	7.48177e-13	Cd63-ps
	Cd68	2.28293	10.6399	135.739	2.27541e-31	1.08581e-29	Cd68			Cd68	1.12999	10.6154	23.3468	1.3527e-06	2.54967e-05	Cd68
	Cd72	2.65222	5.17595	282.092	2.62829e-63	5.47609e-61	Cd72			Cd72	2.22368	5.04729	92.6128	6.35947e-22	7.60777e-20	Cd72
	Cd74	2.42365	10.1178	171.812	2.97491e-39	2.2453e-37	Cd74			Cd74	1.26597	10.1144	13.4242	0.000248399	0.00248299	Cd74
	Cd83	1.59191	7.96616	178.279	1.15125e-40	9.51424e-39	Cd83			Cd83	1.28534	7.96837	66.7855	3.02714e-16	2.12818e-14	Cd83
	Cd9	1.79698	10.3901	145.654	1.54486e-33	8.31023e-32	Cd9			Cd9	1.05193	10.3585	26.4616	2.68823e-07	5.89898e-06	Cd9
	Cdh23	-1.40298	5.84527	89.8741	2.53808e-21	6.80179e-20	Cdh23			Cdh23	-1.2045	5.90941	55.2947	1.03747e-13	5.67892e-12	Cdh23
	Cdk1	2.28389	3.34532	92.1312	8.11173e-22	2.23458e-20	Cdk1			Cdk1	1.49175	3.30208	19.12	1.22753e-05	0.00018449	Cdk1
	Cdk18	3.2617	4.40811	402.723	1.40632e-89	5.94391e-87	Cdk18			Cdk18	3.53293	4.46572	184.778	4.38875e-42	1.44673e-39	Cdk18
	Cdkn1a	1.90168	4.77585	103.072	3.23237e-24	1.02831e-22	Cdkn1a			Cdkn1a	1.36364	4.56401	34.6576	3.93094e-09	1.2328e-07	Cdkn1a
	Cdkn2a	3.5278	1.53233	32.4796	1.20452e-08	9.14237e-08	Cdkn2a			Cdkn2a	3.76011	1.27113	26.8707	2.17532e-07	4.85975e-06	Cdkn2a
	Ceacam1	-1.4881	5.07889	50.0222	1.52016e-12	1.86931e-11	Ceacam1			Ceacam1	-1.01687	5.01603	24.4405	7.66425e-07	1.51994e-05	Ceacam1
	Cenpb	1.71096	6.61712	97.3084	5.93292e-23	1.74832e-21	Cenpb			Cenpb	1.20785	6.82706	25.652	4.08869e-07	8.63984e-06	Cenpb
	Cenpe	1.07005	1.61699	10.7467	0.00104464	0.0030753	Cenpe			Cenpe	1.2195	1.60997	7.11118	0.00766046	0.0425282	Cenpe
	Cep170b	1.44781	1.7498	17.9787	2.23396e-05	9.69687e-05	Cep170b			Cep170b	1.44275	1.96144	9.05868	0.00261451	0.0179165	Cep170b
	Cfap161	3.52883	0.519976	22.1005	2.5874e-06	1.35136e-05	Cfap161			Cfap161	6.66416	0.0159868	49.31	2.18549e-12	9.97524e-11	Cfap161
	Ch25h	5.68375	5.813	305.402	2.19211e-68	5.40464e-66	Ch25h			Ch25h	5.57501	5.82991	210.944	8.54732e-48	3.25105e-45	Ch25h
	Chp2	-1.42903	1.41673	13.3967	0.000252066	0.000866361	Chp2			Chp2	-1.34937	1.78155	10.1204	0.00146634	0.0110978	Chp2
	Chpf	1.15553	1.33309	7.94014	0.004835	0.0119666	Chpf			Chpf	1.4236	0.793847	7.90302	0.00493523	0.0299179	Chpf
	Chst10	2.34888	3.80974	140.388	2.18925e-32	1.09411e-30	Chst10			Chst10	2.3853	3.88984	83.173	7.51765e-20	7.79838e-18	Chst10
	Chst11	1.70764	6.60333	172.531	2.07209e-39	1.59648e-37	Chst11			Chst11	1.60029	6.75471	89.346	3.31456e-21	3.66926e-19	Chst11
	Chst2	4.40741	6.51127	1005.33	1.24793e-220	6.15356e-217	Chst2			Chst2	4.36509	6.37908	487.788	4.31686e-108	7.11514e-105	Chst2
	Chst3	4.16691	2.56815	71.9456	2.2121e-17	4.31709e-16	Chst3			Chst3	4.98161	2.51754	82.0641	1.31743e-19	1.33855e-17	Chst3
	Cited4	6.79137	3.3252	154.729	1.60518e-35	9.85287e-34	Cited4			Cited4	5.78643	3.23158	80.8877	2.38915e-19	2.32855e-17	Cited4
	Clec1a	1.94156	2.74584	68.0181	1.62005e-16	2.94055e-15	Clec1a			Clec1a	2.24265	3.12339	61.9988	3.43671e-15	2.19742e-13	Clec1a
	Clec4a2	-1.3324	5.37728	80.0085	3.728e-19	8.51053e-18	Clec4a2			Clec4a2	-1.68968	5.59371	69.6947	6.92327e-17	5.34895e-15	Clec4a2
	Clec4a3	-1.12051	5.70268	60.783	6.37265e-15	9.85064e-14	Clec4a3			Clec4a3	-1.36298	5.77084	63.6944	1.45296e-15	9.66511e-14	Clec4a3
	Clec7a	4.6608	8.60663	1021.15	4.53762e-224	3.35625e-220	Clec7a			Clec7a	4.15826	8.54449	473.014	7.07762e-105	1.04989e-101	Clec7a
	Clic4	1.9219	5.26259	130.306	3.51307e-30	1.58926e-28	Clic4			Clic4	2.03913	5.42814	78.1622	9.49161e-19	8.85525e-17	Clic4
	Cmpk2	1.30973	2.71988	31.2351	2.28593e-08	1.65926e-07	Cmpk2			Cmpk2	1.45394	2.88449	18.6965	1.53266e-05	0.00022481	Cmpk2
	Cnn3	1.71712	2.9711	36.2164	1.76575e-09	1.47742e-08	Cnn3			Cnn3	1.53346	3.15405	17.2214	3.32675e-05	0.000447407	Cnn3
	Col6a3	-1.96323	5.66263	99.3644	2.10062e-23	6.34173e-22	Col6a3			Col6a3	-1.45069	5.35297	38.486	5.51481e-10	1.93855e-08	Col6a3
	Col9a2	2.80435	1.73662	46.7174	8.19997e-12	9.2245e-11	Col9a2			Col9a2	2.23712	1.49695	15.8487	6.86143e-05	0.000833599	Col9a2
	Colec12	2.73968	3.98134	83.1485	7.6116e-20	1.81904e-18	Colec12			Colec12	2.24238	3.92195	72.5085	1.66318e-17	1.3783e-15	Colec12
	Coro1c	1.15351	6.56977	69.4617	7.79129e-17	1.45526e-15	Coro1c			Coro1c	1.04114	6.6747	47.2112	6.37363e-12	2.78898e-10	Coro1c
	Cox6a1	2.26947	7.35998	109.529	1.24292e-25	4.29593e-24	Cox6a1			Cox6a1	1.11954	7.24047	16.5277	4.79452e-05	0.000620348	Cox6a1
	Cox6a2	5.9532	5.98263	330.208	8.66148e-74	2.41753e-71	Cox6a2			Cox6a2	4.15665	5.51247	196.222	1.39438e-44	4.92482e-42	Cox6a2
	Cox8a	2.09445	7.00867	117.902	1.82145e-27	6.96246e-26	Cox8a			Cox8a	1.01095	6.93986	13.7827	0.000205214	0.00213624	Cox8a
	Cpd	1.73243	7.24769	189.31	4.49623e-43	4.4941e-41	Cpd			Cpd	2.07245	7.36698	101.488	7.18847e-24	9.52087e-22	Cpd
	Cpe	3.19768	5.60598	67.7062	1.89766e-16	3.42761e-15	Cpe			Cpe	4.51826	5.97508	107.304	3.81875e-25	5.78033e-23	Cpe
	Cpeb1	3.583	3.61144	182.311	1.51666e-41	1.34347e-39	Cpeb1			Cpeb1	4.24019	3.73751	174.231	8.81143e-40	2.56292e-37	Cpeb1
	Cplx2	1.6733	1.84162	14.6796	0.000127417	0.000467175	Cplx2			Cplx2	1.5536	2.45844	14.81	0.000118906	0.00134236	Cplx2
	Cpq	2.42723	5.05469	303.137	6.82797e-68	1.62913e-65	Cpq			Cpq	2.30984	5.07342	89.6555	2.83465e-21	3.18554e-19	Cpq
	Creb3l1	2.40195	2.4554	50.3022	1.31804e-12	1.63572e-11	Creb3l1			Creb3l1	1.5988	2.47864	13.8472	0.000198291	0.00208023	Creb3l1
	Creg2	2.70329	1.02852	41.0621	1.47469e-10	1.41381e-09	Creg2			Creg2	2.36008	0.731642	19.956	7.92441e-06	0.000125054	Creg2
	Crem	1.17967	3.16447	29.4915	5.61641e-08	3.86435e-07	Crem			Crem	1.35991	3.12844	23.8603	1.03584e-06	2.00073e-05	Crem
	Crip1	2.91858	4.94321	169.664	8.76002e-39	6.4152e-37	Crip1			Crip1	1.556	4.70012	22.0188	2.69997e-06	4.75105e-05	Crip1
	Crlf2	3.17354	8.63977	177.401	1.78982e-40	1.44682e-38	Crlf2			Crlf2	2.18323	8.39675	49.8625	1.64904e-12	7.6205e-11	Crlf2
	Csf1	4.63193	8.24791	842.037	3.9158e-185	7.2408e-182	Csf1			Csf1	4.24333	8.2021	611.472	5.35342e-135	1.98532e-131	Csf1
	Cspg4	5.19618	5.28283	212.152	4.65962e-48	5.8415e-46	Cspg4			Cspg4	3.86462	4.85421	34.8619	3.53944e-09	1.12188e-07	Cspg4
	Cst7	8.20367	10.6744	829.514	2.06707e-182	3.39757e-179	Cst7			Cst7	7.0007	10.4256	576.419	2.25424e-127	5.57323e-124	Cst7
	Cstb	2.42113	6.02774	145.639	1.55664e-33	8.34325e-32	Cstb			Cstb	1.27775	5.8751	27.8221	1.32998e-07	3.12661e-06	Cstb
	Ctla2a	5.95319	2.29431	65.7956	5.00194e-16	8.58396e-15	Ctla2a			Ctla2a	3.95265	1.88054	64.6521	8.93593e-16	6.05277e-14	Ctla2a
	Ctnna3	4.74796	2.09178	45.8085	1.30394e-11	1.43201e-10	Ctnna3			Ctnna3	3.49952	1.7045	44.5748	2.44819e-11	1.00879e-09	Ctnna3
	Ctnnd2	-1.5698	3.00931	31.318	2.19034e-08	1.59571e-07	Ctnnd2			Ctnnd2	-1.51415	3.01012	20.854	4.95653e-06	8.22429e-05	Ctnnd2
	Ctsb	2.13239	12.6724	195.735	1.7809e-44	1.90904e-42	Ctsb			Ctsb	1.72331	12.6591	68.4167	1.32351e-16	9.86582e-15	Ctsb
	Ctsd	2.42472	13.872	167.801	2.23548e-38	1.61315e-36	Ctsd			Ctsd	1.67535	13.7757	42.7281	6.29027e-11	2.462e-09	Ctsd
	Ctse	5.04743	4.5193	310.473	1.72268e-69	4.4708e-67	Ctse			Ctse	4.81498	4.36819	297.203	1.33982e-66	7.64421e-64	Ctse
	Ctsl	2.10876	10.7585	210.241	1.21721e-47	1.47591e-45	Ctsl			Ctsl	1.57361	10.7302	62.0977	3.26838e-15	2.09884e-13	Ctsl
	Ctsz	2.25862	11.5964	153.29	3.31032e-35	1.99063e-33	Ctsz			Ctsz	1.34725	11.5657	30.3035	3.69451e-08	9.80401e-07	Ctsz
	Cxcl14	3.78049	4.01128	110.28	8.51006e-26	2.9621e-24	Cxcl14			Cxcl14	3.3031	3.46611	65.8153	4.95234e-16	3.43285e-14	Cxcl14
	Cxcr4	2.53853	4.75517	90.0553	2.3159e-21	6.21763e-20	Cxcr4			Cxcr4	1.56466	4.37307	27.8396	1.31803e-07	3.11333e-06	Cxcr4
	Cybb	1.81969	6.28638	174.403	8.08483e-40	6.32798e-38	Cybb			Cybb	1.31584	6.42958	43.7234	3.78222e-11	1.54136e-09	Cybb
	Cyp51	1.42658	4.60833	56.0889	6.92663e-14	9.6757e-13	Cyp51			Cyp51	1.69207	4.54719	67.9878	1.64507e-16	1.19622e-14	Cyp51
	Cyr61	-1.60055	1.48734	14.1217	0.00017136	0.000611416	Cyr61			Cyr61	-1.91507	0.996491	11.2048	0.000815856	0.0068221	Cyr61
	Dab1	1.89171	0.905215	11.8353	0.000581187	0.00182576	Dab1			Dab1	2.86988	0.884244	15.778	7.12274e-05	0.000860413	Dab1
	Dact1	2.9027	2.78909	113.058	2.09529e-26	7.5415e-25	Dact1			Dact1	2.99074	2.60079	72.8438	1.4033e-17	1.17846e-15	Dact1
	Dcstamp	8.12246	3.60842	560.426	6.7898e-124	5.90833e-121	Dcstamp			Dcstamp	6.52272	3.25003	271.505	5.33165e-61	2.55128e-58	Dcstamp
	Ddah1	2.63745	0.794775	20.857	4.94888e-06	2.4666e-05	Ddah1			Ddah1	2.27249	1.4983	16.8815	3.97882e-05	0.00052698	Ddah1
	Ddn	3.97796	1.5288	39.3114	3.61324e-10	3.32198e-09	Ddn			Ddn	2.738	2.10691	30.6619	3.07138e-08	8.31402e-07	Ddn
	Ddx31	1.34246	5.7459	101.179	8.40388e-24	2.61173e-22	Ddx31			Ddx31	1.37558	5.94267	69.5883	7.30695e-17	5.61613e-15	Ddx31
	Dgat2	2.00845	1.95291	29.516	5.54565e-08	3.821e-07	Dgat2			Dgat2	1.24193	1.93738	8.06012	0.00452502	0.0279219	Dgat2
	Dhcr24	1.70823	2.73575	32.013	1.53147e-08	1.14189e-07	Dhcr24			Dhcr24	1.44595	2.8536	9.46769	0.00209123	0.0148926	Dhcr24
	Dhcr7	1.20797	5.36365	98.2312	3.72278e-23	1.11255e-21	Dhcr7			Dhcr7	1.00433	5.6108	29.2545	6.34679e-08	1.61213e-06	Dhcr7
	Dio2	2.27856	1.4766	19.6101	9.49642e-06	4.45546e-05	Dio2			Dio2	4.20176	1.92839	39.3566	3.53066e-10	1.26813e-08	Dio2
	Dkk2	8.31451	4.63668	558.523	1.7619e-123	1.44799e-120	Dkk2			Dkk2	7.94418	4.29269	344.05	8.37103e-77	6.89866e-74	Dkk2
	Dlgap3	3.09281	1.19509	24.1671	8.83294e-07	4.99678e-06	Dlgap3			Dlgap3	2.92094	1.69175	22.7313	1.86312e-06	3.37867e-05	Dlgap3
	Dna2	1.18752	3.93665	45.005	1.96532e-11	2.1098e-10	Dna2			Dna2	1.66298	3.96331	29.0218	7.15681e-08	1.79555e-06	Dna2
	Dnajb14	1.10981	7.07522	100.209	1.37134e-23	4.20875e-22	Dnajb14			Dnajb14	1.40003	7.1117	81.5003	1.75235e-19	1.74459e-17	Dnajb14
	Dnph1	1.15286	0.859367	7.32082	0.00681604	0.0161508	Dnph1			Dnph1	1.34153	1.11183	8.33518	0.00388845	0.0246607	Dnph1
	Dok3	-1.07639	6.1255	42.6379	6.587e-11	6.61069e-10	Dok3			Dok3	-1.58846	6.2429	49.4369	2.04852e-12	9.37892e-11	Dok3
	Dpp7	2.32228	7.24108	259.097	2.69993e-58	4.9925e-56	Dpp7			Dpp7	1.84849	7.1185	106.887	4.71357e-25	6.99212e-23	Dpp7
	Dram1	1.83921	1.9833	33.3329	7.76565e-09	6.04935e-08	Dram1			Dram1	1.39361	2.07417	7.28526	0.00695226	0.0393827	Dram1
	Duoxa1	-1.29847	1.88091	6.30882	0.0120139	0.0263996	Duoxa1			Duoxa1	-1.37024	2.62776	11.6885	0.000628889	0.00548761	Duoxa1
	Echs1	1.29985	6.52958	107.867	2.87457e-25	9.6207e-24	Echs1			Echs1	1.05795	6.57692	42.9222	5.69593e-11	2.24121e-09	Echs1
	Ecscr	-1.11082	6.81574	31.2563	2.26112e-08	1.64205e-07	Ecscr			Ecscr	-2.08505	7.37166	76.7394	1.9507e-18	1.74318e-16	Ecscr
	Eef1a1	1.71782	12.4428	140.699	1.87179e-32	9.38623e-31	Eef1a1			Eef1a1	1.20649	12.5119	34.8197	3.61699e-09	1.14158e-07	Eef1a1
	Eef1b2	1.90276	8.34138	164.063	1.46554e-37	1.02748e-35	Eef1b2			Eef1b2	1.1583	8.38393	21.9777	2.75837e-06	4.84232e-05	Eef1b2
	Eef1g	1.63994	7.92676	179.567	6.02503e-41	5.03549e-39	Eef1g			Eef1g	1.03936	7.9371	27.7172	1.40408e-07	3.28001e-06	Eef1g
	Efemp2	1.71525	4.6977	104.132	1.89317e-24	6.12817e-23	Efemp2			Efemp2	1.16056	4.62769	21.6914	3.20232e-06	5.54943e-05	Efemp2
	Efr3b	3.84377	4.76091	227.364	2.23932e-51	3.15488e-49	Efr3b			Efr3b	4.29003	5.1796	125.313	4.34775e-29	7.67791e-27	Efr3b
	Egln3	5.34078	5.16206	754.421	4.3859e-166	4.99082e-163	Egln3			Egln3	5.68789	5.16429	283.033	1.6391e-63	8.68371e-61	Egln3
	Egr2	1.63307	4.7878	65.9465	4.6332e-16	7.96039e-15	Egr2			Egr2	1.64848	4.76889	72.5229	1.65107e-17	1.37596e-15	Egr2
	Eif4b	1.07632	8.05777	86.0804	1.72764e-20	4.31707e-19	Eif4b			Eif4b	1.12473	8.10729	56.0146	7.19334e-14	4.02664e-12	Eif4b
	Ell2	1.13133	4.1698	41.9098	9.55822e-11	9.42003e-10	Ell2			Ell2	1.08212	4.09116	26.8498	2.199e-07	4.89788e-06	Ell2
	Eml2	2.22255	3.45947	128.338	9.46832e-30	4.18104e-28	Eml2			Eml2	1.8375	3.38274	37.7378	8.09212e-10	2.79159e-08	Eml2
	Enpp1	1.29993	4.59972	74.6246	5.69299e-18	1.1795e-16	Enpp1			Enpp1	1.37062	4.64643	54.1135	1.89233e-13	9.95421e-12	Enpp1
	Epha2	-1.19665	4.98177	10.9279	0.000947245	0.00281943	Epha2			Epha2	-1.44027	5.39612	53.7063	2.32817e-13	1.21179e-11	Epha2
	Ephx1	2.52857	6.74407	377.733	3.87685e-84	1.36548e-81	Ephx1			Ephx1	1.88155	6.54418	103.525	2.57163e-24	3.5652e-22	Ephx1
	Eps8	-1.47241	2.83971	28.275	1.05246e-07	6.90422e-07	Eps8			Eps8	-1.22242	2.80923	16.8972	3.94587e-05	0.00052402	Eps8
	Ermap	-1.15244	3.193	37.5148	9.07229e-10	7.90379e-09	Ermap			Ermap	-1.10673	3.1305	14.7866	0.000120389	0.00135599	Ermap
	Etl4	4.88339	5.41717	304.006	4.41615e-68	1.07095e-65	Etl4			Etl4	4.89802	5.37255	183.781	7.24344e-42	2.32938e-39	Etl4
	Etv4	2.14829	2.61112	37.3765	9.73877e-10	8.45952e-09	Etv4			Etv4	2.09329	2.71386	27.1986	1.83588e-07	4.18445e-06	Etv4
	F2r	3.70713	1.42502	62.7312	2.36938e-15	3.8181e-14	F2r			F2r	3.52828	0.959282	16.819	4.11194e-05	0.000541229	F2r
	Fabp3	6.78722	4.88945	330.884	6.1701e-74	1.75528e-71	Fabp3			Fabp3	5.34522	4.59908	173.495	1.27597e-39	3.63994e-37	Fabp3
	Fabp5	7.04494	6.76112	461.748	2.00209e-102	1.05775e-99	Fabp5			Fabp5	6.51986	6.44873	285.026	6.03125e-64	3.31362e-61	Fabp5
	Fabp7	1.83669	-0.0601912	8.58442	0.00339052	0.00872795	Fabp7			Fabp7	2.71129	-0.116433	12.7932	0.000347888	0.0032996	Fabp7
	Fads6	-1.50547	3.24495	44.7623	2.2247e-11	2.37617e-10	Fads6			Fads6	-1.11246	3.37492	19.1506	1.208e-05	0.000181924	Fads6
	Fam107a	2.14155	3.55799	33.0242	9.10197e-09	7.0201e-08	Fam107a			Fam107a	2.91543	4.00746	52.084	5.31753e-13	2.6739e-11	Fam107a
	Fam129b	1.30428	5.4757	99.2783	2.19402e-23	6.61022e-22	Fam129b			Fam129b	1.11675	5.65011	30.8744	2.75278e-08	7.53409e-07	Fam129b
	Fam189a2	3.50633	3.01529	122.551	1.74874e-28	7.16596e-27	Fam189a2			Fam189a2	2.77459	2.76439	65.8157	4.95113e-16	3.43285e-14	Fam189a2
	Fam19a3	3.10208	1.31454	35.7709	2.21942e-09	1.83213e-08	Fam19a3			Fam19a3	3.1387	0.9824	20.7683	5.18341e-06	8.56243e-05	Fam19a3
	Fam20c	4.18602	6.76075	757.355	1.00989e-166	1.24495e-163	Fam20c			Fam20c	3.86584	6.62584	439.762	1.2199e-97	1.508e-94	Fam20c
	Fam72a	-1.39656	4.02597	66.1107	4.26287e-16	7.37552e-15	Fam72a			Fam72a	-1.40778	3.85529	33.3044	7.88058e-09	2.36163e-07	Fam72a
	Fam78b	2.41912	0.769855	37.6714	8.37236e-10	7.32854e-09	Fam78b			Fam78b	2.75148	0.606175	15.4548	8.4501e-05	0.000998795	Fam78b
	Fasn	1.18155	5.70855	62.7859	2.30443e-15	3.72562e-14	Fasn			Fasn	1.07882	5.66959	36.5768	1.46769e-09	4.89252e-08	Fasn
	Fblim1	1.2023	5.80846	85.6867	2.10829e-20	5.23289e-19	Fblim1			Fblim1	1.28341	5.87908	54.796	1.33709e-13	7.12716e-12	Fblim1
	Fbn2	3.79673	1.05464	24.8241	6.28084e-07	3.63792e-06	Fbn2			Fbn2	2.97908	0.540828	13.9728	0.000185479	0.00196809	Fbn2
	Fbxo2	1.61717	0.532197	8.11353	0.0043936	0.0109955	Fbxo2			Fbxo2	2.67825	0.789878	9.44341	0.00211909	0.0150621	Fbxo2
	Fbxw10	-1.0865	2.26039	13.4775	0.000241441	0.000832742	Fbxw10			Fbxw10	-1.11077	2.4938	14.7336	0.000123822	0.00139255	Fbxw10
	Fcho1	1.82986	2.00127	28.8489	7.82497e-08	5.2568e-07	Fcho1			Fcho1	1.26062	2.0336	7.60265	0.00582826	0.0341725	Fcho1
	Fgd2	-1.15537	9.30795	66.1191	4.24482e-16	7.35288e-15	Fgd2			Fgd2	-1.21697	9.36649	50.3056	1.31571e-12	6.23553e-11	Fgd2
	Fgf1	3.36939	4.20785	186.529	1.81933e-42	1.73634e-40	Fgf1			Fgf1	3.08603	4.36034	163.315	2.13464e-37	5.55531e-35	Fgf1
	Fgf11	-1.84563	4.11615	108.896	1.7105e-25	5.84376e-24	Fgf11			Fgf11	-1.80465	4.05079	61.01	5.67848e-15	3.58445e-13	Fgf11
	Fgf13	2.43997	4.06649	189.95	3.25962e-43	3.28024e-41	Fgf13			Fgf13	2.21775	4.05663	69.8291	6.46726e-17	5.04923e-15	Fgf13
	Fgf2	1.10374	4.45522	41.2327	1.35143e-10	1.30239e-09	Fgf2			Fgf2	1.42252	4.45399	26.3912	2.78801e-07	6.09093e-06	Fgf2
	Fgl2	1.46793	5.37161	125.053	4.95422e-29	2.11204e-27	Fgl2			Fgl2	1.53154	5.61858	55.777	8.11776e-14	4.51007e-12	Fgl2
	Fgr	2.1563	4.81571	169.635	8.89059e-39	6.47874e-37	Fgr			Fgr	1.47344	5.06103	56.2048	6.53006e-14	3.68315e-12	Fgr
	Filip1l	-1.37156	5.90902	68.6742	1.16153e-16	2.13573e-15	Filip1l			Filip1l	-1.25208	5.38064	52.6904	3.90501e-13	1.9838e-11	Filip1l
	Flt1	2.70055	5.68706	83.8922	5.22509e-20	1.26908e-18	Flt1			Flt1	2.20896	5.9839	23.4775	1.26384e-06	2.40357e-05	Flt1
	Flt3	-1.04329	2.09606	10.5701	0.00114929	0.0033573	Flt3			Flt3	-1.39389	2.13258	11.65	0.000642036	0.00557282	Flt3
	Fmn1	1.36014	4.11879	48.5922	3.15128e-12	3.73234e-11	Fmn1			Fmn1	2.17383	4.2698	60.3619	7.89253e-15	4.91923e-13	Fmn1
	Fndc4	1.89797	2.82085	52.6103	4.06741e-13	5.22302e-12	Fndc4			Fndc4	1.69751	2.87492	28.4262	9.73386e-08	2.37097e-06	Fndc4
	Foxred2	-1.20061	1.61959	14.1751	0.000166557	0.000595861	Foxred2			Foxred2	-1.55522	1.44333	13.6605	0.000219013	0.00225613	Foxred2
	Fth1	2.31249	11.1985	167.899	2.12824e-38	1.54329e-36	Fth1			Fth1	1.38439	11.1094	26.8741	2.17149e-07	4.8585e-06	Fth1
	Ftl1	1.84594	9.92991	121.001	3.81959e-28	1.53125e-26	Ftl1			Ftl1	1.08277	9.87368	15.9073	6.65219e-05	0.000813108	Ftl1
	Ftl1-ps1	1.86256	4.43478	104.12	1.90422e-24	6.15046e-23	Ftl1-ps1			Ftl1-ps1	1.168	4.40644	16.4507	4.99308e-05	0.000641831	Ftl1-ps1
	Fundc2	1.54056	4.68914	60.225	8.46125e-15	1.29305e-13	Fundc2			Fundc2	1.15104	4.71655	28.0701	1.17e-07	2.80385e-06	Fundc2
	Fuom	1.68833	2.52643	29.4222	5.82066e-08	3.99189e-07	Fuom			Fuom	1.0247	2.57223	10.1023	0.00148087	0.0112021	Fuom
	Fxyd5	2.6379	5.50643	205.517	1.30595e-46	1.52118e-44	Fxyd5			Fxyd5	1.38595	5.50865	22.89	1.71545e-06	3.13001e-05	Fxyd5
	Fxyd6	4.69973	2.3206	178.194	1.20175e-40	9.87637e-39	Fxyd6			Fxyd6	4.49755	2.22143	50.182	1.40125e-12	6.51604e-11	Fxyd6
	Fyn	1.69883	5.04188	158.932	1.93613e-36	1.25619e-34	Fyn			Fyn	1.38373	4.9872	54.5203	1.53854e-13	8.15095e-12	Fyn
	Fzd9	2.26687	0.862998	19.6584	9.2596e-06	4.35956e-05	Fzd9			Fzd9	2.01773	0.993993	12.0973	0.000504951	0.00453691	Fzd9
	Gabre	3.26016	0.684459	29.8519	4.66328e-08	3.26165e-07	Gabre			Gabre	4.05817	0.472221	27.8313	1.32364e-07	3.11665e-06	Gabre
	Gadd45a	2.2559	2.0082	52.3214	4.71221e-13	6.0353e-12	Gadd45a			Gadd45a	1.37582	1.68888	7.73089	0.00542839	0.0323262	Gadd45a
	Gadl1	-1.52031	1.28363	14.4472	0.000144142	0.000523135	Gadl1			Gadl1	-2.05334	1.31198	16.8653	4.0129e-05	0.000531021	Gadl1
	Galc	1.09744	6.34973	79.6253	4.52598e-19	1.02531e-17	Galc			Galc	1.18802	6.34925	62.5538	2.59259e-15	1.67941e-13	Galc
	Galnt9	2.68372	0.981984	36.0731	1.90052e-09	1.5857e-08	Galnt9			Galnt9	1.84451	0.644934	11.2699	0.00078776	0.00661326	Galnt9
	Gas2l3	2.91322	4.29619	245.626	2.33371e-55	3.95468e-53	Gas2l3			Gas2l3	2.82823	4.45092	132.191	1.35902e-30	2.58457e-28	Gas2l3
	Gas7	3.63036	5.53249	456.38	2.94851e-101	1.45391e-98	Gas7			Gas7	3.08646	5.36297	274.613	1.12095e-61	5.54272e-59	Gas7
	Gbp7	-1.74937	4.99959	146.841	8.50103e-34	4.70995e-32	Gbp7			Gbp7	-1.10392	4.84397	34.3247	4.66425e-09	1.45662e-07	Gbp7
	Gcnt2	1.6403	5.46089	92.3898	7.11804e-22	1.96817e-20	Gcnt2			Gcnt2	1.64778	5.46306	81.2157	2.02382e-19	1.99416e-17	Gcnt2
	Gdf11	1.43123	0.579009	7.20789	0.00725838	0.0170218	Gdf11			Gdf11	1.64106	0.616792	7.26197	0.00704299	0.0397397	Gdf11
	Gfap	8.58959	7.17595	296.075	2.3595e-66	5.36987e-64	Gfap			Gfap	9.99585	7.59141	324.602	1.44082e-72	1.1249e-69	Gfap
	Ggh	1.64915	6.141	162.169	3.80068e-37	2.61504e-35	Ggh			Ggh	1.10041	6.12771	41.8464	9.87309e-11	3.74572e-09	Ggh
	Ggt5	-1.0554	5.80712	72.9735	1.31404e-17	2.61623e-16	Ggt5			Ggt5	-1.01625	5.92059	35.8372	2.14511e-09	7.05554e-08	Ggt5
	Ggta1	-1.81164	6.65134	237.401	1.45025e-53	2.18914e-51	Ggta1			Ggta1	-1.51802	6.53704	101.267	8.03743e-24	1.05511e-21	Ggta1
	Ghr	2.55097	1.85489	45.837	1.28512e-11	1.41344e-10	Ghr			Ghr	2.56221	1.40158	24.5052	7.41114e-07	1.47964e-05	Ghr
	Gimap3	2.56501	1.5575	44.7477	2.24133e-11	2.3922e-10	Gimap3			Gimap3	2.15643	0.935098	14.4851	0.000141276	0.00155929	Gimap3
	Gimap6	-1.23857	4.72397	66.4288	3.62757e-16	6.38081e-15	Gimap6			Gimap6	-1.57277	4.82534	70.1226	5.57311e-17	4.37415e-15	Gimap6
	Gimap9	-1.47232	2.99843	30.3229	3.65774e-08	2.58771e-07	Gimap9			Gimap9	-1.63136	2.96718	23.3202	1.37154e-06	2.58191e-05	Gimap9
	Gla	2.42076	4.40826	143.589	4.36873e-33	2.25967e-31	Gla			Gla	2.24717	4.44602	105.382	1.00739e-24	1.45084e-22	Gla
	Glb1	2.05751	7.60373	256.919	8.05726e-58	1.45355e-55	Glb1			Glb1	1.41812	7.60838	78.4035	8.40038e-19	7.88679e-17	Glb1
	Glipr1	2.30848	4.19261	177.831	1.44182e-40	1.17839e-38	Glipr1			Glipr1	1.59502	4.28257	48.7577	2.89618e-12	1.30583e-10	Glipr1
	Gm10132	2.27065	3.15485	76.9388	1.76341e-18	3.78608e-17	Gm10132			Gm10132	1.13244	3.27482	17.0562	3.62888e-05	0.000485838	Gm10132
	Gm10154	2.19846	3.59124	114.232	1.15927e-26	4.26595e-25	Gm10154			Gm10154	1.04435	3.62651	14.1567	0.000168198	0.00181326	Gm10154
	Gm10155	2.55248	1.98024	49.261	2.24076e-12	2.70813e-11	Gm10155			Gm10155	1.1788	1.79984	6.94725	0.00839481	0.0456986	Gm10155
	Gm10177	1.93785	3.24945	69.4972	7.65247e-17	1.43114e-15	Gm10177			Gm10177	1.25594	3.07992	12.0772	0.000510428	0.00458058	Gm10177
	Gm10240	2.26737	1.27047	29.755	4.90237e-08	3.40793e-07	Gm10240			Gm10240	1.30658	1.12713	9.36379	0.00221314	0.0156245	Gm10240
	Gm10275	2.02867	6.94522	146.936	8.10566e-34	4.50778e-32	Gm10275			Gm10275	1.16373	6.93167	20.0649	7.48593e-06	0.000119021	Gm10275
	Gm10335	2.28651	5.28231	188.135	8.11918e-43	7.9541e-41	Gm10335			Gm10335	1.0168	5.1437	12.6116	0.000383362	0.0035766	Gm10335
	Gm10443	2.40184	4.75778	180.03	4.77429e-41	4.01284e-39	Gm10443			Gm10443	1.47295	4.4341	21.3081	3.91075e-06	6.65276e-05	Gm10443
	Gm10561	2.8423	0.334351	16.1509	5.84905e-05	0.000230733	Gm10561			Gm10561	2.45621	0.10401	7.18237	0.00736235	0.0412016	Gm10561
	Gm10790	-1.39062	7.03963	51.8016	6.14008e-13	7.80328e-12	Gm10790			Gm10790	-1.3874	7.30405	68.4947	1.2722e-16	9.53125e-15	Gm10790
	Gm10819	2.00086	2.18727	22.8057	1.79229e-06	9.67993e-06	Gm10819			Gm10819	1.26881	1.69497	7.39936	0.00652471	0.0373697	Gm10819
	Gm11249	2.03145	1.48768	29.0649	6.99921e-08	4.73864e-07	Gm11249			Gm11249	1.55822	1.52444	9.87213	0.00167801	0.01239	Gm11249
	Gm11263	2.02121	4.00567	67.5377	2.067e-16	3.70183e-15	Gm11263			Gm11263	1.36245	3.85398	17.3822	3.05672e-05	0.000417143	Gm11263
	Gm11361	1.97906	3.01874	63.9642	1.26698e-15	2.09647e-14	Gm11361			Gm11361	1.29003	2.93263	16.3523	5.25922e-05	0.000670397	Gm11361
	Gm11545	1.19155	2.10233	10.3338	0.00130617	0.00376503	Gm11545			Gm11545	1.68812	2.24016	20.379	6.3523e-06	0.000102871	Gm11545
	Gm11703	2.05845	3.32469	59.2802	1.36747e-14	2.04955e-13	Gm11703			Gm11703	1.27097	3.34382	16.6962	4.38688e-05	0.00057436	Gm11703
	Gm11808	2.65818	6.87965	180.234	4.30828e-41	3.64185e-39	Gm11808			Gm11808	1.08881	6.67486	10.6389	0.00110731	0.00882635	Gm11808
	Gm12070	2.52798	2.81217	105.364	1.01656e-24	3.31964e-23	Gm12070			Gm12070	1.17167	2.69087	14.2039	0.000164028	0.00177602	Gm12070
	Gm12164	2.50631	0.479273	28.4088	9.82192e-08	6.48352e-07	Gm12164			Gm12164	2.48693	0.358287	10.0877	0.0014926	0.0112621	Gm12164
	Gm12411	1.96033	2.95678	15.947	6.51423e-05	0.000255001	Gm12411			Gm12411	1.41552	2.69045	9.00464	0.00269295	0.0183328	Gm12411
	Gm12918	2.11536	3.37511	83.3484	6.87951e-20	1.65209e-18	Gm12918			Gm12918	1.06583	3.38106	11.3592	0.000750771	0.00635313	Gm12918
	Gm13391	3.81109	3.57811	170.455	5.88648e-39	4.37582e-37	Gm13391			Gm13391	3.06463	3.38083	91.6205	1.05e-21	1.22643e-19	Gm13391
	Gm13394	2.19332	1.7777	41.0067	1.51706e-10	1.45349e-09	Gm13394			Gm13394	1.31625	1.63899	10.3894	0.00126744	0.00985904	Gm13394
	Gm13456	1.82097	5.20495	175.97	3.67661e-40	2.92409e-38	Gm13456			Gm13456	1.26561	5.23826	35.0951	3.13986e-09	1.00381e-07	Gm13456
	Gm13778	-1.26591	1.02528	10.8867	0.000968568	0.00287711	Gm13778			Gm13778	-1.8189	1.69678	16.2278	5.61637e-05	0.000702346	Gm13778
	Gm13889	2.83413	5.34382	116.91	3.00368e-27	1.13641e-25	Gm13889			Gm13889	2.29753	5.16251	36.2649	1.72238e-09	5.69039e-08	Gm13889
	Gm14648	2.21515	3.02993	64.8876	7.92944e-16	1.33296e-14	Gm14648			Gm14648	1.17908	2.86086	14.0678	0.000176336	0.00188728	Gm14648
	Gm14681	1.57723	2.44948	37.8448	7.66042e-10	6.72925e-09	Gm14681			Gm14681	1.33366	2.51438	15.5391	8.0815e-05	0.000959048	Gm14681
	Gm15156	4.90687	2.58583	98.7727	2.83216e-23	8.49821e-22	Gm15156			Gm15156	3.17802	2.2794	59.0753	1.51755e-14	9.15098e-13	Gm15156
	Gm15500	1.8984	6.03185	128.068	1.08475e-29	4.76161e-28	Gm15500			Gm15500	1.15522	6.10752	24.3648	7.97105e-07	1.57657e-05	Gm15500
	Gm15513	-1.21265	3.709	38.2311	6.28414e-10	5.617e-09	Gm15513			Gm15513	-1.47767	3.73702	39.8769	2.70488e-10	9.83435e-09	Gm15513
	Gm15590	2.19435	2.40195	65.6075	5.50298e-16	9.38934e-15	Gm15590			Gm15590	1.08135	2.29055	8.86397	0.00290854	0.0194963	Gm15590
	Gm15682	2.68716	2.0704	56.4005	5.91144e-14	8.34393e-13	Gm15682			Gm15682	1.52557	2.11631	11.5351	0.000682946	0.00586886	Gm15682
	Gm15707	-1.71893	0.079906	9.34403	0.00223713	0.00603244	Gm15707			Gm15707	-1.62089	0.510226	8.57728	0.00340384	0.0221071	Gm15707
	Gm15710	1.96401	3.94833	85.638	2.16085e-20	5.35434e-19	Gm15710			Gm15710	1.09362	3.99099	12.5003	0.000406882	0.0037676	Gm15710
	Gm15753	1.54004	2.26992	30.3944	3.52536e-08	2.50003e-07	Gm15753			Gm15753	1.28335	2.34717	11.5114	0.0006917	0.00593665	Gm15753
	Gm15850	-1.01979	2.52929	9.40864	0.00215966	0.00584483	Gm15850			Gm15850	-1.29323	2.96282	23.6639	1.14714e-06	2.19853e-05	Gm15850
	Gm15880	1.4956	2.91446	32.9331	9.53829e-09	7.33188e-08	Gm15880			Gm15880	1.08039	3.30282	18.4662	1.72945e-05	0.000249074	Gm15880
	Gm15912	-1.57396	1.58704	23.1089	1.5308e-06	8.39332e-06	Gm15912			Gm15912	-2.29895	2.03441	28.4612	9.5596e-08	2.34392e-06	Gm15912
	Gm16071	1.93048	0.268404	10.4517	0.00122537	0.00356196	Gm16071			Gm16071	2.48744	0.369839	10.9462	0.000937972	0.0076534	Gm16071
	Gm16353	2.68254	0.328181	21.4485	3.63454e-06	1.84953e-05	Gm16353			Gm16353	2.96346	0.464309	17.8591	2.37882e-05	0.0003329	Gm16353
	Gm16712	-1.63442	2.26823	38.9395	4.37139e-10	3.97455e-09	Gm16712			Gm16712	-1.0285	1.89077	7.27963	0.00697408	0.0394562	Gm16712
	Gm1673	6.69294	5.43599	231.24	3.19797e-52	4.68391e-50	Gm1673			Gm1673	5.81209	4.86721	91.2265	1.28131e-21	1.4734e-19	Gm1673
	Gm19688	-1.719	-0.163645	7.21875	0.00721457	0.0169567	Gm19688			Gm19688	-2.43723	-0.0269289	11.8111	0.000588802	0.00518663	Gm19688
	Gm2000	2.23594	5.14252	141.716	1.12221e-32	5.74424e-31	Gm2000			Gm2000	1.08473	5.02474	15.0029	0.000107345	0.00123152	Gm2000
	Gm2065	3.90644	0.344449	42.3131	7.77698e-11	7.74713e-10	Gm2065			Gm2065	2.83819	0.518572	11.9147	0.000556917	0.00494986	Gm2065
	Gm2225	2.44456	1.40122	37.0185	1.17014e-09	1.00522e-08	Gm2225			Gm2225	1.51186	1.57733	12.2586	0.000463114	0.00421044	Gm2225
	Gm2451	1.96818	0.926646	28.4859	9.4383e-08	6.24981e-07	Gm2451			Gm2451	1.28784	0.753627	6.86422	0.00879386	0.0475394	Gm2451
	Gm26714	2.40312	2.73279	58.6648	1.86961e-14	2.75195e-13	Gm26714			Gm26714	3.03783	2.79922	54.2536	1.76216e-13	9.30246e-12	Gm26714
	Gm26797	1.35999	0.311553	5.96292	0.0146098	0.0312891	Gm26797			Gm26797	1.83628	0.48043	8.90492	0.00284404	0.0191418	Gm26797
	Gm26902	5.2217	2.24115	154.587	1.72367e-35	1.05364e-33	Gm26902			Gm26902	6.45966	2.39852	117.405	2.3406e-27	3.77397e-25	Gm26902
	Gm27008	-1.05411	1.58842	6.69372	0.00967532	0.0218882	Gm27008			Gm27008	-1.09942	1.63112	8.44491	0.00366067	0.0234466	Gm27008
	Gm28151	-1.02611	2.96792	18.9984	1.30829e-05	5.96596e-05	Gm28151			Gm28151	-1.34611	3.06618	23.4189	1.30291e-06	2.47154e-05	Gm28151
	Gm28286	-1.77935	3.36676	52.6784	3.92898e-13	5.05403e-12	Gm28286			Gm28286	-1.31575	3.59616	33.8968	5.81133e-09	1.78479e-07	Gm28286
	Gm28417	-1.06883	3.86207	26.0773	3.28025e-07	1.98627e-06	Gm28417			Gm28417	-1.24205	4.01458	28.7859	8.0838e-08	2.00192e-06	Gm28417
	Gm28874	-1.22534	1.74352	11.4788	0.00070393	0.00216458	Gm28874			Gm28874	-2.34944	1.92312	39.3052	3.62478e-10	1.29879e-08	Gm28874
	Gm29264	-1.99371	1.40734	29.3673	5.98781e-08	4.09702e-07	Gm29264			Gm29264	-1.82578	1.24106	7.53767	0.00604222	0.0350941	Gm29264
	Gm3379	1.73942	1.95557	33.5211	7.04951e-09	5.52967e-08	Gm3379			Gm3379	1.24308	1.72701	8.17492	0.00424736	0.0265286	Gm3379
	Gm33858	-1.73487	4.64021	21.383	3.76096e-06	1.90926e-05	Gm33858			Gm33858	-1.93695	5.51265	52.1941	5.02763e-13	2.53673e-11	Gm33858
	Gm3591	-1.01313	4.381	25.8057	3.77576e-07	2.26776e-06	Gm3591			Gm3591	-1.22573	4.56572	41.3595	1.26654e-10	4.7444e-09	Gm3591
	Gm37168	1.34838	1.60981	19.3148	1.10843e-05	5.11187e-05	Gm37168			Gm37168	1.88519	2.11082	20.9252	4.77558e-06	7.96861e-05	Gm37168
	Gm37317	-3.32687	2.03415	92.0789	8.32902e-22	2.29017e-20	Gm37317			Gm37317	-1.99064	1.95181	10.72	0.00105983	0.0085073	Gm37317
	Gm37416	2.25792	2.81683	41.8823	9.69358e-11	9.54708e-10	Gm37416			Gm37416	2.35986	2.84235	31.3529	2.1514e-08	5.98759e-07	Gm37416
	Gm38158	-1.22558	4.89979	56.0901	6.92266e-14	9.6757e-13	Gm38158			Gm38158	-1.01181	4.98468	28.8414	7.85537e-08	1.95514e-06	Gm38158
	Gm38335	6.10949	0.185537	48.8711	2.73344e-12	3.26358e-11	Gm38335			Gm38335	3.14942	-0.0850597	11.5967	0.000660689	0.00571646	Gm38335
	Gm38386	2.77218	1.54972	65.5988	5.52717e-16	9.41975e-15	Gm38386			Gm38386	3.11818	1.34581	40.7143	1.76192e-10	6.50158e-09	Gm38386
	Gm40841	-1.57854	4.59589	93.4752	4.11319e-22	1.15021e-20	Gm40841			Gm40841	-1.31653	4.54769	26.9711	2.06522e-07	4.65585e-06	Gm40841
	Gm41071	-1.84819	2.80514	30.8106	2.84476e-08	2.04483e-07	Gm41071			Gm41071	-2.2445	3.3414	59.0207	1.56022e-14	9.37017e-13	Gm41071
	Gm4204	1.18369	4.19189	28.7968	8.0383e-08	5.38813e-07	Gm4204			Gm4204	1.13002	4.28345	32.6857	1.0833e-08	3.16332e-07	Gm4204
	Gm42847	2.40873	0.0764526	20.8927	4.85751e-06	2.42351e-05	Gm42847			Gm42847	5.41832	-0.00369026	32.7314	1.05814e-08	3.09594e-07	Gm42847
	Gm42944	-2.53715	4.72247	234.299	6.88231e-53	1.0181e-50	Gm42944			Gm42944	-1.29909	4.58726	26.1674	3.13066e-07	6.78951e-06	Gm42944
	Gm43185	2.78693	-0.119367	18.1703	2.02003e-05	8.84617e-05	Gm43185			Gm43185	3.57252	0.108918	15.1594	9.88035e-05	0.00114147	Gm43185
	Gm4332	1.94487	4.65876	87.62	7.9317e-21	2.03704e-19	Gm4332			Gm4332	1.1415	4.59596	13.4621	0.00024343	0.00244319	Gm4332
	Gm43351	2.01995	1.65235	20.7839	5.1413e-06	2.55476e-05	Gm43351			Gm43351	2.22967	1.86745	22.0684	2.63111e-06	4.65195e-05	Gm43351
	Gm4349	1.39559	0.375692	9.27217	0.00232662	0.00624867	Gm4349			Gm4349	2.34774	0.151649	11.1188	0.000854557	0.00708184	Gm4349
	Gm43814	3.03282	-0.135794	23.3957	1.31875e-06	7.28194e-06	Gm43814			Gm43814	2.9491	0.42594	16.4051	5.11466e-05	0.000655189	Gm43814
	Gm43936	-1.16338	0.169665	6.98528	0.00821827	0.018978	Gm43936			Gm43936	-3.00128	0.540632	24.2396	8.50653e-07	1.67134e-05	Gm43936
	Gm44037	-1.24825	1.39631	11.0898	0.000868036	0.0026094	Gm44037			Gm44037	-1.15621	1.78905	9.47346	0.00208466	0.0148593	Gm44037
	Gm44620	2.07853	0.439147	13.7406	0.000209866	0.000734108	Gm44620			Gm44620	3.86827	0.937716	25.9475	3.50823e-07	7.54219e-06	Gm44620
	Gm45338	1.09902	1.75736	9.55215	0.00199715	0.00546097	Gm45338			Gm45338	1.03413	1.96954	9.67612	0.00186679	0.0136039	Gm45338
	Gm45431	-1.44138	0.0055896	5.70006	0.0169643	0.035571	Gm45431			Gm45431	-2.66717	1.00947	22.805	1.79299e-06	3.26747e-05	Gm45431
	Gm45855	1.87671	3.11081	72.9554	1.32614e-17	2.63676e-16	Gm45855			Gm45855	1.32122	3.15532	15.1865	9.73962e-05	0.00112873	Gm45855
	Gm48071	-1.34936	-0.200847	5.58211	0.0181449	0.0376832	Gm48071			Gm48071	-1.49689	0.559839	7.80375	0.0052138	0.0312256	Gm48071
	Gm4841	2.84975	0.60562	25.3041	4.89667e-07	2.89167e-06	Gm4841			Gm4841	2.8459	0.666851	17.6739	2.62205e-05	0.000364532	Gm4841
	Gm48614	-1.79463	1.39111	22.147	2.52552e-06	1.32108e-05	Gm48614			Gm48614	-1.84954	1.36085	13.544	0.00023304	0.00236128	Gm48614
	Gm4951	1.04888	2.81864	16.3709	5.20801e-05	0.000207829	Gm4951			Gm4951	1.26441	2.79116	20.1194	7.27552e-06	0.000116173	Gm4951
	Gm5182	2.8269	2.87665	80.087	3.58287e-19	8.19186e-18	Gm5182			Gm5182	2.65781	2.89623	24.4637	7.57227e-07	1.50371e-05	Gm5182
	Gm5424	2.62218	1.26576	27.563	1.52058e-07	9.74182e-07	Gm5424			Gm5424	2.79211	1.20782	31.9919	1.5482e-08	4.42505e-07	Gm5424
	Gm5559	2.49585	4.4509	147.839	5.1451e-34	2.89397e-32	Gm5559			Gm5559	1.02172	4.38906	14.2111	0.000163402	0.00177057	Gm5559
	Gm5637	1.23835	2.33559	26.2531	2.99478e-07	1.82838e-06	Gm5637			Gm5637	1.14686	2.62402	8.81414	0.00298905	0.0199458	Gm5637
	Gm5786	2.33526	1.01256	22.9661	1.6488e-06	8.98366e-06	Gm5786			Gm5786	1.41975	0.685249	7.8623	0.00504761	0.0304746	Gm5786
	Gm5805	2.39156	2.55455	90.7544	1.62659e-21	4.40699e-20	Gm5805			Gm5805	1.15292	2.42354	11.6444	0.00064397	0.00558634	Gm5805
	Gm5869	1.71121	1.62216	22.8473	1.75395e-06	9.49209e-06	Gm5869			Gm5869	1.38491	1.56741	12.9729	0.000316024	0.00304805	Gm5869
	Gm6136	1.95137	6.91285	202.335	6.45948e-46	7.23903e-44	Gm6136			Gm6136	1.0583	6.93097	28.4332	9.69892e-08	2.36634e-06	Gm6136
	Gm6166	5.4555	-0.37929	41.9463	9.38154e-11	9.25824e-10	Gm6166			Gm6166	3.59793	-0.487981	13.866	0.000196317	0.0020639	Gm6166
	Gm6274	1.36067	1.36957	9.56124	0.00198729	0.00543603	Gm6274			Gm6274	1.37531	1.34449	7.61562	0.00578647	0.0339941	Gm6274
	Gm6311	2.1392	1.21917	32.944	9.48511e-09	7.30038e-08	Gm6311			Gm6311	1.37005	1.26548	8.00738	0.00465871	0.028604	Gm6311
	Gm6545	2.55496	0.191042	22.6195	1.97475e-06	1.05346e-05	Gm6545			Gm6545	2.58179	0.215377	10.9441	0.000939044	0.00765793	Gm6545
	Gm6560	2.62347	3.08525	141.315	1.37328e-32	6.95717e-31	Gm6560			Gm6560	1.52348	2.91458	28.9781	7.3201e-08	1.83114e-06	Gm6560
	Gm7027	2.08586	1.69033	41.3182	1.29356e-10	1.25233e-09	Gm7027			Gm7027	1.04336	1.79368	6.7895	0.00916957	0.0491407	Gm7027
	Gm7206	1.86963	1.4411	30.1566	3.98534e-08	2.80739e-07	Gm7206			Gm7206	1.11742	1.53594	7.95515	0.00479509	0.0292589	Gm7206
	Gm7331	2.3518	3.23262	99.0623	2.44681e-23	7.35683e-22	Gm7331			Gm7331	1.25934	3.19871	13.5553	0.000231639	0.00235352	Gm7331
	Gm7336	2.26931	3.12237	83.0502	7.99967e-20	1.9087e-18	Gm7336			Gm7336	1.18521	3.18516	15.7707	7.15006e-05	0.000863011	Gm7336
	Gm7694	-1.49427	4.85295	103.289	2.89714e-24	9.25646e-23	Gm7694			Gm7694	-1.4133	4.80829	53.4435	2.66138e-13	1.3708e-11	Gm7694
	Gm8129	2.28912	3.25133	65.3395	6.30464e-16	1.06955e-14	Gm8129			Gm8129	1.46765	3.13291	14.4198	0.000146255	0.00160588	Gm8129
	Gm8159	-1.57927	-0.365787	5.2147	0.0223968	0.0452184	Gm8159			Gm8159	-2.506	0.845199	16.2784	5.46848e-05	0.000687453	Gm8159
	Gm8430	2.15504	3.55228	81.5043	1.74881e-19	4.08692e-18	Gm8430			Gm8430	1.08188	3.53619	11.5617	0.000673246	0.00579624	Gm8430
	Gm8730	1.91595	2.70663	57.2593	3.81973e-14	5.50734e-13	Gm8730			Gm8730	1.0317	2.9647	9.17709	0.00245063	0.0169952	Gm8730
	Gm9294	2.57751	0.224896	14.7825	0.00012065	0.000444861	Gm9294			Gm9294	2.03644	0.190276	9.39075	0.00218083	0.015427	Gm9294
	Gm9385	2.33528	1.88213	46.7516	8.05772e-12	9.07828e-11	Gm9385			Gm9385	1.36797	1.63157	8.65932	0.00325393	0.0213456	Gm9385
	Gm9794	2.51488	7.74811	211.592	6.17379e-48	7.67469e-46	Gm9794			Gm9794	1.31574	7.63131	27.1981	1.83637e-07	4.18445e-06	Gm9794
	Gm9843	2.18479	5.62424	133.489	7.06852e-31	3.2882e-29	Gm9843			Gm9843	1.00009	5.52278	11.6744	0.000633646	0.00551391	Gm9843
	Gnas	2.2701	6.45664	121.331	3.23346e-28	1.3069e-26	Gnas			Gnas	1.93221	6.41086	76.769	1.92174e-18	1.72771e-16	Gnas
	Gng12	1.92089	6.95689	205.71	1.18518e-46	1.39146e-44	Gng12			Gng12	1.80504	6.9574	130.64	2.96767e-30	5.50281e-28	Gng12
	Gnptab	1.3619	6.00507	130.379	3.38551e-30	1.53625e-28	Gnptab			Gnptab	1.71553	6.00205	103.258	2.94268e-24	4.04182e-22	Gnptab
	Got1	1.89164	6.25752	293.298	9.50598e-66	2.038e-63	Got1			Got1	1.69321	6.23434	85.2916	2.57448e-20	2.68943e-18	Got1
	Gpd2	1.19975	3.48235	37.4722	9.27268e-10	8.06413e-09	Gpd2			Gpd2	1.3802	3.48087	34.0192	5.45721e-09	1.68651e-07	Gpd2
	Gpi1	1.88687	8.40164	221.638	3.97298e-50	5.24753e-48	Gpi1			Gpi1	1.34957	8.31898	49.1048	2.42644e-12	1.10073e-10	Gpi1
	Gpm6b	1.66911	4.31654	25.5134	4.3933e-07	2.61319e-06	Gpm6b			Gpm6b	2.94575	4.5478	45.7798	1.32322e-11	5.62424e-10	Gpm6b
	Gpnmb	9.36217	8.36703	321.572	6.58452e-72	1.771e-69	Gpnmb			Gpnmb	8.50594	8.03049	499.24	1.39073e-110	2.94715e-107	Gpnmb
	Gpr150	-1.34914	1.04937	12.0613	0.000514799	0.00164161	Gpr150			Gpr150	-1.58881	1.24444	11.1307	0.00084912	0.00704466	Gpr150
	Gpr153	1.67945	0.939853	18.8161	1.4395e-05	6.51207e-05	Gpr153			Gpr153	1.30683	0.943695	7.06345	0.00786724	0.0434323	Gpr153
	Gpr162	1.40464	5.64145	101.599	6.7978e-24	2.12152e-22	Gpr162			Gpr162	1.12722	5.78845	39.5596	3.18201e-10	1.15408e-08	Gpr162
	Gpr165	-3.13743	4.16303	118.918	1.09133e-27	4.24844e-26	Gpr165			Gpr165	-1.60948	3.30809	11.2349	0.000802721	0.00672744	Gpr165
	Gpr65	2.56208	4.90161	272.321	3.54032e-61	7.0773e-59	Gpr65			Gpr65	1.61139	4.81527	58.0528	2.55173e-14	1.49025e-12	Gpr65
	Grrp1	2.72205	1.34695	56.748	4.95386e-14	7.09414e-13	Grrp1			Grrp1	1.95199	1.05816	10.8072	0.00101108	0.00818241	Grrp1
	Gsn	1.69231	4.63866	145.749	1.47295e-33	7.95232e-32	Gsn			Gsn	1.18423	4.75248	33.522	7.04632e-09	2.12882e-07	Gsn
	Gstm5	1.79985	3.96162	47.0756	6.83019e-12	7.74245e-11	Gstm5			Gstm5	1.15399	4.08459	16.8885	3.96419e-05	0.000525982	Gstm5
	Gsto1	1.89941	5.78818	102.468	4.38348e-24	1.38557e-22	Gsto1			Gsto1	1.07881	5.71761	20.3797	6.35011e-06	0.000102871	Gsto1
	Gtf3c4	1.17782	6.42362	68.0638	1.5829e-16	2.88018e-15	Gtf3c4			Gtf3c4	1.60641	6.51282	79.2864	5.3729e-19	5.10907e-17	Gtf3c4
	Gusb	1.87543	9.33009	190.439	2.55042e-43	2.58414e-41	Gusb			Gusb	1.53768	9.25915	85.4763	2.345e-20	2.46707e-18	Gusb
	Gyg	1.8465	5.62369	182.25	1.56386e-41	1.37703e-39	Gyg			Gyg	1.64906	5.60611	71.8793	2.28766e-17	1.87487e-15	Gyg
	H2-D1	2.34145	10.6375	238.399	8.78489e-54	1.33974e-51	H2-D1			H2-D1	1.89529	10.6715	60.8436	6.17941e-15	3.88413e-13	H2-D1
	H2-K1	1.90404	10.0286	183.351	8.99042e-42	8.06032e-40	H2-K1			H2-K1	1.45844	10.1441	35.078	3.16751e-09	1.01047e-07	H2-K1
	H2-M3	1.32315	6.20485	93.1631	4.81569e-22	1.34412e-20	H2-M3			H2-M3	1.08553	6.30393	33.5441	6.96677e-09	2.10908e-07	H2-M3
	H2-Q4	1.39077	6.38194	77.5532	1.29197e-18	2.79827e-17	H2-Q4			H2-Q4	1.24332	6.47275	31.3899	2.11073e-08	5.89184e-07	H2-Q4
	H2-Q5	2.157	3.68669	76.9773	1.72938e-18	3.71842e-17	H2-Q5			H2-Q5	2.01856	3.55709	28.7705	8.14841e-08	2.01456e-06	H2-Q5
	H2-Q6	2.53039	5.85473	146.383	1.0704e-33	5.8646e-32	H2-Q6			H2-Q6	2.26396	6.01599	54.9738	1.22149e-13	6.56509e-12	H2-Q6
	H2-Q7	2.85023	4.94713	227.03	2.64932e-51	3.6973e-49	H2-Q7			H2-Q7	2.40515	5.12661	51.1319	8.6363e-13	4.25182e-11	H2-Q7
	H2-T-ps	2.20377	1.64185	44.4397	2.62318e-11	2.76584e-10	H2-T-ps			H2-T-ps	2.48252	1.72902	28.6212	8.80152e-08	2.16207e-06	H2-T-ps
	Hacd2	2.01491	6.01902	245.61	2.35255e-55	3.95468e-53	Hacd2			Hacd2	1.34903	5.86319	58.7078	1.82911e-14	1.08532e-12	Hacd2
	Hbegf	-1.03655	1.40594	6.32625	0.0118964	0.0261685	Hbegf			Hbegf	-1.24136	1.52717	10.1663	0.00143034	0.0108864	Hbegf
	Hcar2	3.55614	5.78641	162.456	3.28824e-37	2.27304e-35	Hcar2			Hcar2	2.63395	5.78273	191.695	1.35662e-43	4.57367e-41	Hcar2
	Hcst	2.08613	4.33905	84.396	4.04964e-20	9.85302e-19	Hcst			Hcst	1.01492	4.24592	13.5684	0.000230029	0.00234037	Hcst
	Hdgfl3	-1.91297	3.60835	48.2953	3.66639e-12	4.28073e-11	Hdgfl3			Hdgfl3	-1.03974	3.29144	11.3667	0.000747727	0.00634179	Hdgfl3
	Helz2	1.1924	3.95094	20.5512	5.80584e-06	2.84956e-05	Helz2			Helz2	1.64855	4.06515	32.9492	9.45973e-09	2.78977e-07	Helz2
	Hexa	1.83336	10.7047	181.913	1.85257e-41	1.6216e-39	Hexa			Hexa	1.32737	10.7	44.4116	2.6611e-11	1.09348e-09	Hexa
	Hif1a	2.05364	7.97445	280.395	6.15899e-63	1.26542e-60	Hif1a			Hif1a	2.31038	8.18714	183.744	7.38041e-42	2.32938e-39	Hif1a
	Hist1h1c	1.56146	6.19118	51.7167	6.41153e-13	8.12036e-12	Hist1h1c			Hist1h1c	1.23563	5.65181	22.7998	1.79784e-06	3.2723e-05	Hist1h1c
	Hist1h1d	2.31861	2.71513	38.249	6.22684e-10	5.57251e-09	Hist1h1d			Hist1h1d	2.81272	1.58942	27.0809	1.95113e-07	4.41878e-06	Hist1h1d
	Hist1h2bc	1.50443	5.40071	134.371	4.53341e-31	2.11554e-29	Hist1h2bc			Hist1h2bc	1.23191	4.87767	16.8013	4.15048e-05	0.000545818	Hist1h2bc
	Hist1h4i	1.30764	2.92309	17.8098	2.44125e-05	0.000105287	Hist1h4i			Hist1h4i	1.2054	2.19242	9.01165	0.00268264	0.0182775	Hist1h4i
	Hlf	-2.0002	4.07505	62.3607	2.85978e-15	4.56855e-14	Hlf			Hlf	-1.90063	3.798	43.3104	4.6709e-11	1.8676e-09	Hlf
	Hmgn3	2.00471	3.88678	102.901	3.52239e-24	1.11577e-22	Hmgn3			Hmgn3	1.5078	3.95239	31.8228	1.689e-08	4.77681e-07	Hmgn3
	Hmmr	1.37147	1.36988	16.7835	4.18956e-05	0.000171727	Hmmr			Hmmr	1.70097	1.06109	11.5962	0.000660877	0.00571646	Hmmr
	Hpcal4	1.94391	0.947796	20.2007	6.97289e-06	3.37312e-05	Hpcal4			Hpcal4	2.24374	0.776775	9.39543	0.00217527	0.015395	Hpcal4
	Hpse	5.79148	5.66203	201.834	8.31123e-46	9.24422e-44	Hpse			Hpse	5.32322	5.70857	688.6	9.00989e-152	6.68264e-148	Hpse
	Hrh2	-1.04925	4.24981	21.7982	3.02891e-06	1.56175e-05	Hrh2			Hrh2	-1.22541	4.55106	27.2721	1.76747e-07	4.04608e-06	Hrh2
	Hs3st1	3.17008	2.54711	81.7028	1.58167e-19	3.70217e-18	Hs3st1			Hs3st1	2.50028	2.28579	33.7801	6.17079e-09	1.88355e-07	Hs3st1
	Hsf2bp	-2.1875	2.80698	74.9674	4.78551e-18	9.95668e-17	Hsf2bp			Hsf2bp	-2.58191	2.97702	77.3616	1.42359e-18	1.29555e-16	Hsf2bp
	Hsf4	2.38533	1.61884	45.3707	1.63059e-11	1.76713e-10	Hsf4			Hsf4	2.23188	1.59104	24.7849	6.40982e-07	1.29895e-05	Hsf4
	Hspb11	1.35278	2.09739	19.5811	9.64184e-06	4.51366e-05	Hspb11			Hspb11	1.01317	2.72344	7.23036	0.00716809	0.0403179	Hspb11
	I830077J02Rik	-1.08006	6.54778	27.716	1.40494e-07	9.04013e-07	I830077J02Rik			I830077J02Rik	-1.04009	6.9981	41.3026	1.30392e-10	4.8599e-09	I830077J02Rik
	Ifi204	2.02965	5.19508	221.645	3.95796e-50	5.24753e-48	Ifi204			Ifi204	2.19629	5.31044	90.2345	2.11538e-21	2.41381e-19	Ifi204
	Ifi206	1.00067	2.0581	12.3243	0.000447089	0.00144912	Ifi206			Ifi206	1.60573	2.26671	25.2879	4.93803e-07	1.03025e-05	Ifi206
	Ifi207	1.66997	4.74545	129.058	6.58697e-30	2.93497e-28	Ifi207			Ifi207	2.03704	4.82007	91.5676	1.07846e-21	1.24984e-19	Ifi207
	Ifi27l2a	4.33091	6.10482	218.822	1.63453e-49	2.12102e-47	Ifi27l2a			Ifi27l2a	3.02885	6.09456	74.3712	6.47274e-18	5.61501e-16	Ifi27l2a
	Ifi44	2.52686	1.15898	30.5261	3.29404e-08	2.34611e-07	Ifi44			Ifi44	2.35209	1.56221	28.4218	9.75622e-08	2.37252e-06	Ifi44
	Ifit1	1.38858	2.89767	26.1114	3.22275e-07	1.95226e-06	Ifit1			Ifit1	2.04838	3.17658	31.8209	1.69059e-08	4.77681e-07	Ifit1
	Ifit2	1.79977	4.72477	112.106	3.38742e-26	1.20747e-24	Ifit2			Ifit2	1.92866	5.04818	74.1653	7.18405e-18	6.19582e-16	Ifit2
	Ifit3	1.89924	4.82515	106.205	6.65027e-25	2.19592e-23	Ifit3			Ifit3	1.525	5.21226	38.1774	6.45964e-10	2.25464e-08	Ifit3
	Ifit3b	1.24688	2.27294	11.424	0.000724996	0.00222277	Ifit3b			Ifit3b	1.31972	2.90071	16.8369	4.07331e-05	0.000537576	Ifit3b
	Ifitm3	2.71249	6.19906	149.367	2.38377e-34	1.37746e-32	Ifitm3			Ifitm3	1.42909	6.4125	18.5313	1.67133e-05	0.000241643	Ifitm3
	Igf1	5.53141	7.41529	923.88	6.31872e-203	1.86946e-199	Igf1			Igf1	4.85918	7.30534	596.071	1.19788e-131	3.55388e-128	Igf1
	Igf1os	5.38714	1.64988	116.548	3.60586e-27	1.35729e-25	Igf1os			Igf1os	3.74873	1.10848	27.923	1.26243e-07	3.00719e-06	Igf1os
	Igfbp5	4.32037	3.48565	269.214	1.68391e-60	3.27765e-58	Igfbp5			Igfbp5	3.63046	3.52661	43.3521	4.57249e-11	1.8332e-09	Igfbp5
	Igfbp6	1.98363	0.362528	10.1202	0.00146656	0.00416489	Igfbp6			Igfbp6	2.11869	0.214657	6.93309	0.00846154	0.0460012	Igfbp6
	Igsf10	1.36955	1.41237	14.6803	0.000127371	0.000467175	Igsf10			Igsf10	2.01324	1.46156	13.52	0.000236031	0.00238507	Igsf10
	Ikbke	1.08419	1.69008	8.97818	0.00273222	0.00720201	Ikbke			Ikbke	2.70988	1.65525	30.5744	3.21298e-08	8.66569e-07	Ikbke
	Il18bp	1.36454	3.39573	31.9599	1.57389e-08	1.17293e-07	Il18bp			Il18bp	1.06829	3.40151	17.2829	3.22077e-05	0.000435921	Il18bp
	Il1r1	2.39435	3.17505	95.0216	1.88319e-22	5.37799e-21	Il1r1			Il1r1	2.13906	3.17261	51.4524	7.33534e-13	3.62708e-11	Il1r1
	Il1rn	2.22847	1.41447	24.8246	6.27914e-07	3.63792e-06	Il1rn			Il1rn	1.86406	1.50514	14.1637	0.000167575	0.00180918	Il1rn
	Il27ra	1.75784	0.83134	17.3441	3.11869e-05	0.000132002	Il27ra			Il27ra	1.98152	0.63964	12.9938	0.000312522	0.00302608	Il27ra
	Il3ra	3.75597	5.64644	333.43	1.72081e-74	5.0912e-72	Il3ra			Il3ra	2.41034	5.49098	62.8051	2.28205e-15	1.49128e-13	Il3ra
	Il6	-1.30944	2.78704	23.3583	1.3446e-06	7.41638e-06	Il6			Il6	-1.13303	3.00276	12.8529	0.000336964	0.00321449	Il6
	Il7r	-1.59668	4.25682	77.9313	1.06687e-18	2.33811e-17	Il7r			Il7r	-1.94466	4.27086	69.7148	6.85285e-17	5.32226e-15	Il7r
	Ildr1	-1.01367	2.65571	12.8245	0.000342111	0.00113701	Ildr1			Ildr1	-1.12791	2.65135	15.3525	8.92014e-05	0.00104602	Ildr1
	Impdh1	1.21805	2.70481	20.669	5.45937e-06	2.69561e-05	Impdh1			Impdh1	1.03211	2.94039	9.14072	0.00249982	0.0172717	Impdh1
	Inf2	3.20306	4.94131	298.474	7.08366e-67	1.66331e-64	Inf2			Inf2	2.81906	4.72397	146.199	1.17428e-33	2.52453e-31	Inf2
	Insig1	1.21741	4.57333	41.3753	1.25634e-10	1.22029e-09	Insig1			Insig1	1.31705	4.74829	33.3078	7.86678e-09	2.36163e-07	Insig1
	Irf4	-1.75448	3.28625	67.7147	1.88953e-16	3.41708e-15	Irf4			Irf4	-1.2208	3.26102	21.8737	2.91195e-06	5.07589e-05	Irf4
	Irf7	1.94425	4.76959	77.6976	1.20086e-18	2.60856e-17	Irf7			Irf7	1.35849	4.92994	23.1889	1.46839e-06	2.74334e-05	Irf7
	Itga5	1.27316	6.2643	131.122	2.32901e-30	1.06997e-28	Itga5			Itga5	1.24837	6.21164	68.3179	1.39153e-16	1.02697e-14	Itga5
	Itga9	-1.29839	6.21563	56.3987	5.91684e-14	8.34393e-13	Itga9			Itga9	-1.10604	6.0245	26.4224	2.74339e-07	6.01114e-06	Itga9
	Itgae	-1.51363	2.71957	28.3171	1.02983e-07	6.77078e-07	Itgae			Itgae	-1.31177	2.70373	10.418	0.00124795	0.00973293	Itgae
	Itgax	5.32055	9.05419	792.503	2.30141e-174	3.40448e-171	Itgax			Itgax	4.76398	8.89789	614.836	9.9303e-136	4.9102e-132	Itgax
	Kbtbd11	1.56622	3.24099	43.109	5.17739e-11	5.2711e-10	Kbtbd11			Kbtbd11	1.97173	3.2307	50.4657	1.21267e-12	5.76561e-11	Kbtbd11
	Kcnd1	-1.37517	6.1044	103.053	3.26253e-24	1.03568e-22	Kcnd1			Kcnd1	-1.23273	5.99567	65.6631	5.34983e-16	3.67404e-14	Kcnd1
	Kcnh2	3.29808	3.39301	83.6003	6.05635e-20	1.46392e-18	Kcnh2			Kcnh2	2.808	3.22916	47.9383	4.39846e-12	1.9361e-10	Kcnh2
	Kcnj2	2.09721	7.47847	210.244	1.21507e-47	1.47591e-45	Kcnj2			Kcnj2	2.3191	7.5198	156.378	6.99949e-36	1.67468e-33	Kcnj2
	Kcnk3	3.30086	0.732955	32.0331	1.51566e-08	1.13181e-07	Kcnk3			Kcnk3	2.11424	0.861065	9.5188	0.00203377	0.0145393	Kcnk3
	Kcnk9	5.37575	4.20009	263.873	2.45592e-59	4.65776e-57	Kcnk9			Kcnk9	6.55111	4.41207	124.872	5.42967e-29	9.36554e-27	Kcnk9
	Kdf1	2.99019	-0.0122333	20.496	5.97564e-06	2.92998e-05	Kdf1			Kdf1	2.41788	0.441707	13.7984	0.000203508	0.00212146	Kdf1
	Kdm6b	-1.09801	4.88222	25.7711	3.84394e-07	2.30589e-06	Kdm6b			Kdm6b	-1.30342	4.91938	41.4596	1.20332e-10	4.53045e-09	Kdm6b
	Kif1a	2.71875	4.2532	183.37	8.90359e-42	8.03114e-40	Kif1a			Kif1a	2.9783	4.48995	149.76	1.95585e-34	4.53329e-32	Kif1a
	Kif5a	4.50843	5.48393	111.263	5.18205e-26	1.82519e-24	Kif5a			Kif5a	4.97463	6.04728	279.653	8.93671e-63	4.57128e-60	Kif5a
	Kif5c	2.13269	2.05937	23.7431	1.10089e-06	6.14544e-06	Kif5c			Kif5c	2.51797	2.47758	43.6765	3.874e-11	1.57444e-09	Kif5c
	Kiss1r	-1.47934	0.9749	11.1438	0.000843117	0.00254224	Kiss1r			Kiss1r	-1.20177	1.03465	7.02571	0.00803477	0.0441927	Kiss1r
	Klhl23	-1.31996	4.30618	78.5585	7.76645e-19	1.72248e-17	Klhl23			Klhl23	-1.11184	4.11513	25.9727	3.46276e-07	7.45524e-06	Klhl23
	Klk10	-3.70458	-0.61543	22.602	1.99281e-06	1.06271e-05	Klk10			Klk10	-3.17645	-0.420715	10.8917	0.000965987	0.00786037	Klk10
	Klrb1a	4.04644	0.319544	38.4513	5.61362e-10	5.04509e-09	Klrb1a			Klrb1a	2.75679	-0.0185094	7.00854	0.00811217	0.0444865	Klrb1a
	Klrb1b	3.05135	2.65354	92.794	5.80313e-22	1.61668e-20	Klrb1b			Klrb1b	3.03771	2.50296	80.8774	2.4017e-19	2.32855e-17	Klrb1b
	Klrb1c	2.85886	1.17178	34.4929	4.27799e-09	3.43004e-08	Klrb1c			Klrb1c	1.66835	0.994846	11.117	0.000855391	0.00708479	Klrb1c
	Klrd1	-1.33488	1.53516	15.0695	0.000103625	0.000387593	Klrd1			Klrd1	-1.87761	1.93035	23.6812	1.13686e-06	2.18165e-05	Klrd1
	Kynu	2.81023	2.63672	77.8086	1.13523e-18	2.47692e-17	Kynu			Kynu	2.86711	2.65256	72.9789	1.31041e-17	1.11716e-15	Kynu
	Lamc1	1.04403	4.50099	39.3028	3.62928e-10	3.33466e-09	Lamc1			Lamc1	1.25285	4.45301	37.0973	1.12379e-09	3.81471e-08	Lamc1
	Lancl2	1.30371	1.74319	17.7565	2.51059e-05	0.000107979	Lancl2			Lancl2	1.18844	1.57273	7.72713	0.0054397	0.0323676	Lancl2
	Ldha	1.86484	8.14135	141.006	1.60445e-32	8.07301e-31	Ldha			Ldha	1.37141	8.10898	50.5747	1.14712e-12	5.48914e-11	Ldha
	Ldlr	2.66318	4.88199	197.979	5.76672e-45	6.27258e-43	Ldlr			Ldlr	2.61019	5.15407	104.004	2.01924e-24	2.8258e-22	Ldlr
	Ldlrad3	3.54881	3.50202	186.175	2.17391e-42	2.06145e-40	Ldlrad3			Ldlrad3	3.53325	3.71863	158.812	2.05687e-36	5.08526e-34	Ldlrad3
	Lgals3	3.44669	5.75437	350.858	2.7563e-78	8.8639e-76	Lgals3			Lgals3	1.81707	5.54914	33.0475	8.99335e-09	2.68425e-07	Lgals3
	Lgals3bp	3.01185	9.72946	367.503	6.54455e-82	2.20031e-79	Lgals3bp			Lgals3bp	2.35563	9.81068	125.187	4.63128e-29	8.0824e-27	Lgals3bp
	Lgi2	8.67095	5.0124	265.565	1.05094e-59	2.01903e-57	Lgi2			Lgi2	8.33197	5.18348	373.005	4.14862e-83	4.39576e-80	Lgi2
	Lingo1	3.09578	0.947662	36.9595	1.20609e-09	1.0331e-08	Lingo1			Lingo1	3.89102	1.06098	40.3807	2.08993e-10	7.65482e-09	Lingo1
	Lmna	2.05055	3.52829	78.3728	8.53197e-19	1.88942e-17	Lmna			Lmna	1.31764	3.77612	16.2803	5.46294e-05	0.000687339	Lmna
	Lox	5.15143	4.89167	545.722	1.07288e-120	7.21413e-118	Lox			Lox	5.81637	4.84214	191.991	1.1686e-43	4.03141e-41	Lox
	Lpar6	-1.25226	7.23449	98.0332	4.1142e-23	1.21967e-21	Lpar6			Lpar6	-1.20954	7.10356	64.9439	7.70601e-16	5.24362e-14	Lpar6
	Lpl	5.43712	8.77333	980.134	3.73601e-215	1.38167e-211	Lpl			Lpl	5.46625	8.87576	707.263	7.87793e-156	1.16861e-151	Lpl
	Lrba	-1.35736	7.19804	139.598	3.25885e-32	1.61772e-30	Lrba			Lrba	-1.44983	7.26677	94.3371	2.66111e-22	3.26239e-20	Lrba
	Lrfn4	2.68451	2.46031	63.5927	1.52998e-15	2.51477e-14	Lrfn4			Lrfn4	2.85826	2.11177	31.3878	2.11302e-08	5.89184e-07	Lrfn4
	Lrpap1	2.06059	8.02302	154.744	1.59237e-35	9.81498e-34	Lrpap1			Lrpap1	1.47318	7.99902	67.0798	2.60742e-16	1.85065e-14	Lrpap1
	Lrrc27	2.62752	2.71429	74.9863	4.73999e-18	9.88979e-17	Lrrc27			Lrrc27	2.14325	2.74884	37.9694	7.18637e-10	2.48491e-08	Lrrc27
	Ly9	1.96624	6.80358	234.451	6.37864e-53	9.53123e-51	Ly9			Ly9	1.85638	6.94602	162.282	3.59032e-37	9.18254e-35	Ly9
	Lyz2	2.48213	10.5941	242.31	1.23333e-54	1.92236e-52	Lyz2			Lyz2	1.52939	10.622	41.9226	9.49599e-11	3.62117e-09	Lyz2
	Lyzl4	1.53747	3.18096	45.7231	1.3621e-11	1.49146e-10	Lyzl4			Lyzl4	1.48623	3.10942	16.4269	5.05635e-05	0.00064884	Lyzl4
	Maf	-1.14123	8.92132	73.1428	1.20602e-17	2.41744e-16	Maf			Maf	-1.03525	8.75366	44.2415	2.90264e-11	1.18944e-09	Maf
	Maff	4.82318	3.81931	126.421	2.48744e-29	1.07593e-27	Maff			Maff	3.6579	3.8504	140.495	2.07496e-32	4.15946e-30	Maff
	Mamdc2	9.5128	6.61418	1664.73	0	0	Mamdc2			Mamdc2	7.98065	6.43397	137.798	8.06672e-32	1.59549e-29	Mamdc2
	Masp1	2.40431	5.1296	247.725	8.13646e-56	1.41603e-53	Masp1			Masp1	2.25048	5.23501	145.019	2.1273e-33	4.50806e-31	Masp1
	Mb21d2	1.04366	2.86991	12.0119	0.000528616	0.00167663	Mb21d2			Mb21d2	1.2212	2.60545	18.6104	1.60344e-05	0.000233879	Mb21d2
	Mbp	1.36647	6.61812	98.2902	3.61343e-23	1.08205e-21	Mbp			Mbp	1.56727	6.9348	48.2202	3.80936e-12	1.69186e-10	Mbp
	Mcoln2	3.1812	0.067932	23.7956	1.07126e-06	5.98912e-06	Mcoln2			Mcoln2	2.40709	0.126452	9.57653	0.0019708	0.0141779	Mcoln2
	Mcoln3	6.0781	1.39563	92.7738	5.86253e-22	1.63016e-20	Mcoln3			Mcoln3	5.21982	0.960524	50.8326	1.00588e-12	4.8922e-11	Mcoln3
	Mdfic	1.50031	4.25507	49.0158	2.5391e-12	3.05622e-11	Mdfic			Mdfic	1.33116	4.25726	41.9738	9.25044e-11	3.53662e-09	Mdfic
	Mdk	1.95121	2.04532	45.7202	1.36409e-11	1.49253e-10	Mdk			Mdk	1.40759	2.43015	9.70319	0.00183949	0.0134418	Mdk
	Me1	1.43666	0.922242	8.38167	0.00379024	0.0096322	Me1			Me1	2.45064	1.12218	26.6331	2.45996e-07	5.43021e-06	Me1
	Megf9	1.08595	3.92124	36.7918	1.3144e-09	1.11875e-08	Megf9			Megf9	1.1511	4.06089	21.2108	4.11436e-06	6.95923e-05	Megf9
	Mex3b	-1.35803	4.17634	67.7274	1.87734e-16	3.3992e-15	Mex3b			Mex3b	-1.0767	3.97297	20.8341	5.00835e-06	8.30099e-05	Mex3b
	Mfrp	-1.26593	1.78091	6.20413	0.0127453	0.0278207	Mfrp			Mfrp	-1.66933	2.14842	14.023	0.00018059	0.00192586	Mfrp
	Mfsd12	1.90109	6.43518	145.057	2.08649e-33	1.10234e-31	Mfsd12			Mfsd12	1.17882	6.5495	33.217	8.24287e-09	2.46522e-07	Mfsd12
	Mgl2	-1.35843	3.37547	38.5953	5.21432e-10	4.69766e-09	Mgl2			Mgl2	-1.85212	3.55866	33.4833	7.18787e-09	2.16717e-07	Mgl2
[truncated: 2,372 more rows]

## Sheet: male compare summary
In IH not NX	logFC	logCPM	LR	PValue	FDR				In NX not IH	logFC	logCPM	LR	PValue	FDR
[truncated: 1,977 more rows]
